# Supplementary material for: SKA1 promotes tumor metastasis via SAFB-mediated transcription repression of DUSP6 in clear cell renal cell carcinoma
Source: Aging (Albany NY). 2022 Dec 2;14(23):9679–98. doi: 10.18632/aging.204418 (PMC9792197; doi:10.18632/aging.204418)
Supplement: Supplementary Table 3A [file aging-14-204418-s004.xlsx]

## Sheet: Slide lists
	Sample	Sample_Label	Chip_Barcode	Chip_Label
	E1373-3_(PrimeView).CEL	NC
	E1373-1_(PrimeView).CEL	NC
	E1373-2_(PrimeView).CEL	NC
	E1374-2_(PrimeView).CEL	KD
	E1374-3_(PrimeView).CEL	KD
	E1374-1_(PrimeView).CEL	KD

## Sheet: Normalized_Data
Supplementary Table 3A. The list of 535 differentially expressed genes from SKA1 silencing group compared with the vector control group.
Probe	KD	KD	KD	NC	NC	NC	P-value	P-value	Fold change	Fold change	Fold change	Fold change	Annotation	Annotation	Annotation	Annotation	Annotation	Annotation
probeSet	E1374-1_(PrimeView).CEL	E1374-2_(PrimeView).CEL	E1374-3_(PrimeView).CEL	E1373-1_(PrimeView).CEL	E1373-2_(PrimeView).CEL	E1373-3_(PrimeView).CEL	Corrected p-value	P-value	Fold change	Log Fold change	Absolute Fold change	Regulation	Gene Symbol	Entrez Gene	Gene Ontology Biological Process	Gene Ontology Cellular Component	Gene Ontology Molecular Function	Alignments
11764191_at	-0.243043	0.0968232	-0.0765195	-0.163464	0.126843	0.0765195	0.691385	0.545914	-1.06256	-0.087546	1.06256	down						chr17:62342072-62343073 (+) // 99.8 // q23.3
11727050_a_at	-0.0518727	-0.0423298	-0.222787	0.120613	0.0423293	0.234542	0.11386	0.0422871	-1.17949	-0.238158	1.17949	down	PPP6C	5537	0000082 // G1/S transition of mitotic cell cycle // traceable author statement /// 0006470 // protein dephosphorylation // inferred from direct assay /// 0006470 // protein dephosphorylation // inferred from electronic annotation /// 0006470 // protein dephosphorylation // traceable author statement /// 0007049 // cell cycle // inferred from electronic annotation	0005737 // cytoplasm // inferred from electronic annotation /// 0005829 // cytosol // inferred from direct assay	0004721 // phosphoprotein phosphatase activity // inferred from electronic annotation /// 0004722 // protein serine/threonine phosphatase activity // inferred from direct assay /// 0004722 // protein serine/threonine phosphatase activity // inferred from electronic annotation /// 0004722 // protein serine/threonine phosphatase activity // traceable author statement /// 0005515 // protein binding …	chr9:127908852-127952218 (-) // 96.0 // q33.3
11750344_a_at	-0.0574694	-0.0741816	-0.0854111	0.0964508	0.0574694	0.101921	0.00567229	0.000621489	-1.11546	-0.157634	1.11546	down	ALOX15	246	0006629 // lipid metabolic process // non-traceable author statement /// 0006691 // leukotriene metabolic process // inferred from electronic annotation /// 0006954 // inflammatory response // traceable author statement /// 0019370 // leukotriene biosynthetic process // inferred from electronic annotation /// 0055114 // oxidation-reduction process // inferred from electronic annotation	0005634 // nucleus // inferred from direct assay /// 0005730 // nucleolus // inferred from direct assay /// 0005737 // cytoplasm // inferred from direct assay /// 0005737 // cytoplasm // inferred from electronic annotation	0005506 // iron ion binding // inferred from electronic annotation /// 0016165 // lipoxygenase activity // inferred from electronic annotation /// 0016165 // lipoxygenase activity // traceable author statement /// 0016491 // oxidoreductase activity // inferred from electronic annotation /// 0016702 // oxidoreductase activity, acting on single donors with incorporation of molecular oxygen, incorpo…	chr17:4534590-4545230 (-) // 97.77 // p13.2
11759307_at	0.0126438	-2.38419e-05	-0.0596323	-0.0164852	0.0535679	2.38419e-05	0.576997	0.41298	-1.01963	-0.0280396	1.01963	down	RREB1	6239	0006351 // transcription, DNA-dependent // inferred from electronic annotation /// 0006355 // regulation of transcription, DNA-dependent // traceable author statement /// 0006355 // regulation of transcription, DNA-dependent // inferred from electronic annotation /// 0006366 // transcription from RNA polymerase II promoter // traceable author statement /// 0007265 // Ras protein signal transducti…	0005622 // intracellular // inferred from electronic annotation /// 0005634 // nucleus // traceable author statement /// 0005634 // nucleus // inferred from electronic annotation /// 0005737 // cytoplasm // traceable author statement /// 0016604 // nuclear body // traceable author statement /// 0016607 // nuclear speck // inferred from electronic annotation	0003676 // nucleic acid binding // inferred from electronic annotation /// 0003677 // DNA binding // inferred from electronic annotation /// 0008270 // zinc ion binding // inferred from electronic annotation /// 0046872 // metal ion binding // inferred from electronic annotation	chr6:7108053-7252213 (+) // 95.0 // p24.3
11761403_at	-0.233551	-0.073885	0.232218	0.073885	0.182277	-0.161573	0.849742	0.756192	-1.04001	-0.0566022	1.04001	down	ISCU	23479	0009399 // nitrogen fixation // traceable author statement /// 0016226 // iron-sulfur cluster assembly // traceable author statement /// 0016226 // iron-sulfur cluster assembly // inferred from electronic annotation	0005634 // nucleus // traceable author statement /// 0005634 // nucleus // inferred from electronic annotation /// 0005737 // cytoplasm // inferred from direct assay /// 0005737 // cytoplasm // inferred from electronic annotation /// 0005739 // mitochondrion // inferred from direct assay /// 0005739 // mitochondrion // inferred from electronic annotation /// 0005829 // cytosol // inferred from di…	0005506 // iron ion binding // traceable author statement /// 0005506 // iron ion binding // inferred from electronic annotation /// 0005515 // protein binding // inferred from physical interaction /// 0032947 // protein complex scaffold // inferred from direct assay /// 0046872 // metal ion binding // inferred from electronic annotation /// 0051536 // iron-sulfur cluster binding // inferred from…	chr12:108956373-108961684 (+) // 80.72 // q23.3
11757172_at	-0.0161591	0.0361137	0.0159111	-0.00799847	-0.0421195	0.00799847	0.453472	0.287662	1.01818	0.025995	1.01818	up	SNORA47	677828				chr5:76376258-76376396 (-) // 100.0 // q13.3
11763268_at	-0.210473	-0.120996	-0.0299182	0.130531	0.0299187	0.181721	0.0811415	0.026804	-1.17651	-0.23452	1.17651	down	FAM120B	84498	0006351 // transcription, DNA-dependent // inferred from electronic annotation /// 0006355 // regulation of transcription, DNA-dependent // inferred from electronic annotation /// 0030154 // cell differentiation // inferred from electronic annotation	0005634 // nucleus // inferred from electronic annotation		chr6:170599790-170716404 (+) // 88.48 // q27
11727695_a_at	0.0343776	-0.0343776	-0.0937104	0.114908	-0.276931	0.304903	0.792344	0.676015	-1.05619	-0.0788635	1.05619	down	KLRC4-KLRK1 /// KLRK1	100528032 /// 22914	0002223 // stimulatory C-type lectin receptor signaling pathway // inferred from electronic annotation /// 0007165 // signal transduction // traceable author statement /// 0030101 // natural killer cell activation // inferred from electronic annotation /// 0030101 // natural killer cell activation // traceable author statement /// 0031295 // T cell costimulation // traceable author statement /// …	0005886 // plasma membrane // traceable author statement /// 0005887 // integral to plasma membrane // traceable author statement /// 0009897 // external side of plasma membrane // inferred from electronic annotation /// 0009986 // cell surface // inferred from electronic annotation /// 0016020 // membrane // inferred from electronic annotation /// 0016021 // integral to membrane // traceable aut…	0004872 // receptor activity // traceable author statement /// 0004872 // receptor activity // inferred from electronic annotation /// 0005515 // protein binding // inferred from physical interaction /// 0030246 // carbohydrate binding // inferred from electronic annotation /// 0032394 // MHC class Ib receptor activity // inferred from electronic annotation /// 0042288 // MHC class I protein bind…	chr12:10524951-10542640 (-) // 54.21 // p13.2
11730840_a_at	0.041028	0.0635309	0.0663948	-0.241196	-0.109231	-0.0410285	0.0970955	0.0341343	1.13876	0.18747	1.13876	up	ZMYND8	23613	0000122 // negative regulation of transcription from RNA polymerase II promoter // inferred from sequence or structural similarity /// 0016310 // phosphorylation // inferred from electronic annotation	0005634 // nucleus // inferred from sequence or structural similarity	0001106 // RNA polymerase II transcription corepressor activity // inferred from sequence or structural similarity /// 0005515 // protein binding // inferred from physical interaction /// 0008270 // zinc ion binding // inferred from electronic annotation /// 0016301 // kinase activity // inferred from electronic annotation /// 0046872 // metal ion binding // inferred from electronic annotation //…	chr20:45837858-45985474 (-) // 98.92 // q13.12
11755175_a_at	-0.223788	-0.199109	-0.160246	0.179978	0.160246	0.332943	0.0119839	0.00190427	-1.33679	-0.41877	1.33679	down	HSPA12A	259217	0006950 // response to stress // inferred from electronic annotation		0000166 // nucleotide binding // inferred from electronic annotation /// 0005524 // ATP binding // inferred from electronic annotation	chr10:118430703-118609716 (-) // 94.89 // q25.3
11731820_at	0.00624561	-0.00658608	-0.00624561	0.087841	0.136575	-0.0979586	0.710826	0.56909	-1.03122	-0.0443479	1.03122	down	ADAM11	4185	0006508 // proteolysis // inferred from electronic annotation /// 0007229 // integrin-mediated signaling pathway // traceable author statement /// 0007229 // integrin-mediated signaling pathway // inferred from electronic annotation	0005886 // plasma membrane // traceable author statement /// 0016020 // membrane // inferred from electronic annotation /// 0016021 // integral to membrane // inferred from electronic annotation /// 0031012 // extracellular matrix // inferred from sequence or structural similarity	0004222 // metalloendopeptidase activity // inferred from electronic annotation /// 0005178 // integrin binding // traceable author statement /// 0008237 // metallopeptidase activity // traceable author statement /// 0008270 // zinc ion binding // inferred from electronic annotation	chr17:42836398-42859214 (+) // 96.66 // q21.31
11731123_a_at	-0.181926	0.0267005	-0.106169	0.0813212	-0.0267005	0.0333605	0.306542	0.164397	-1.08407	-0.116459	1.08407	down	TMEM200A	114801		0016020 // membrane // inferred from electronic annotation /// 0016021 // integral to membrane // inferred from electronic annotation		chr6:130758261-130764212 (+) // 93.26 // q23.1
11761012_x_at	-0.0949116	-0.0313153	0.0215201	0.025527	0.0214782	-0.0214787	0.470575	0.304257	-1.03055	-0.0434112	1.03055	down	POM121L8P	29797				chr20:23969351-23971719 (+) // 91.03 // p11.21 /// chr22:21636713-21639084 (+) // 93.78 // q11.21 /// chr22:18833988-18836359 (+) // 93.41 // q11.21 /// chr22:24647516-24649886 (+) // 92.32 // q11.23 /// chr22:21043862-21046233 (+) // 91.36 // q11.21 /// chr22:21480010-21482381 (-) // 93.66 // q11.21 /// chr22:22984642-22987012 (-) // 92.36 // q11.22 /// chr22:25052816-25055186 (-) // 92.32 // q1…
11763593_a_at	0.106266	-0.0319428	0.0319428	-0.139037	-0.069325	0.0991244	0.589157	0.426279	1.05105	0.0718343	1.05105	up	RGNEF	64283	0021955 // central nervous system neuron axonogenesis // inferred from electronic annotation /// 0030154 // cell differentiation // inferred from electronic annotation /// 0035023 // regulation of Rho protein signal transduction // inferred from electronic annotation /// 0035556 // intracellular signal transduction // inferred from electronic annotation /// 0060052 // neurofilament cytoskeleton o…	0005622 // intracellular // inferred from electronic annotation /// 0005737 // cytoplasm // inferred from direct assay /// 0005737 // cytoplasm // inferred from electronic annotation /// 0005886 // plasma membrane // inferred from electronic annotation /// 0015630 // microtubule cytoskeleton // inferred from direct assay /// 0016020 // membrane // inferred from electronic annotation	0003723 // RNA binding // inferred from electronic annotation /// 0005085 // guanyl-nucleotide exchange factor activity // inferred from electronic annotation /// 0005089 // Rho guanyl-nucleotide exchange factor activity // inferred from electronic annotation /// 0005543 // phospholipid binding // inferred from electronic annotation /// 0046872 // metal ion binding // inferred from electronic ann…	chr5:73181727-73237817 (+) // 99.22 // q13.2
11730317_at	0.117421	-0.00933433	0.114527	-0.201878	0.00933456	-0.35236	0.192793	0.0861293	1.19403	0.255839	1.19403	up	RGS7BP	401190	0007186 // G-protein coupled receptor signaling pathway // inferred from electronic annotation /// 0009968 // negative regulation of signal transduction // inferred from electronic annotation	0005634 // nucleus // inferred from electronic annotation /// 0005737 // cytoplasm // inferred from electronic annotation /// 0005886 // plasma membrane // inferred from electronic annotation /// 0016020 // membrane // inferred from electronic annotation		chr5:63801773-63908145 (+) // 89.65 // q12.3
11743747_a_at	-0.304062	-0.265517	-0.0957966	0.31977	0.0957961	0.237993	0.0348651	0.00862117	-1.35627	-0.439645	1.35627	down	PHKA1	5255	0005975 // carbohydrate metabolic process // traceable author statement /// 0005975 // carbohydrate metabolic process // inferred from electronic annotation /// 0005976 // polysaccharide metabolic process // inferred from electronic annotation /// 0005977 // glycogen metabolic process // traceable author statement /// 0005977 // glycogen metabolic process // inferred from electronic annotation //…	0005829 // cytosol // traceable author statement /// 0005886 // plasma membrane // inferred from electronic annotation /// 0005964 // phosphorylase kinase complex // inferred from electronic annotation /// 0016020 // membrane // inferred from electronic annotation	0003824 // catalytic activity // inferred from electronic annotation /// 0004553 // hydrolase activity, hydrolyzing O-glycosyl compounds // inferred from electronic annotation /// 0004689 // phosphorylase kinase activity // inferred from electronic annotation /// 0004689 // phosphorylase kinase activity // traceable author statement /// 0005516 // calmodulin binding // inferred from electronic an…	chrX:71798663-71934043 (-) // 98.84 // q13.1
11716432_a_at	0.0703497	0.00160503	0.0768194	-0.110213	-0.0467491	-0.00160503	0.149273	0.0610478	1.07359	0.102447	1.07359	up	MNAT1	4331	0000079 // regulation of cyclin-dependent protein kinase activity // traceable author statement /// 0000080 // G1 phase of mitotic cell cycle // traceable author statement /// 0000082 // G1/S transition of mitotic cell cycle // traceable author statement /// 0000082 // G1/S transition of mitotic cell cycle // inferred from electronic annotation /// 0000084 // S phase of mitotic cell cycle // trac…	0005634 // nucleus // inferred from direct assay /// 0005634 // nucleus // inferred from electronic annotation /// 0005654 // nucleoplasm // traceable author statement /// 0005675 // holo TFIIH complex // inferred from direct assay /// 0005737 // cytoplasm // inferred from direct assay /// 0043231 // intracellular membrane-bounded organelle // inferred from direct assay	0004672 // protein kinase activity // inferred from direct assay /// 0005515 // protein binding // inferred from physical interaction /// 0008094 // DNA-dependent ATPase activity // inferred from direct assay /// 0008270 // zinc ion binding // inferred from electronic annotation /// 0008270 // zinc ion binding // traceable author statement /// 0008353 // RNA polymerase II carboxy-terminal domain …	chr14:61201458-61435480 (+) // 94.24 // q23.1
11734196_a_at	-0.0983038	-0.199702	0.0245895	-0.0111403	0.0111408	0.141998	0.301917	0.160686	-1.10074	-0.138472	1.10074	down	SAMD4B	55095				chr19:39842454-39875535 (+) // 90.83 // q13.2
11736790_x_at	0.0916014	-0.0213299	0.0506334	-0.0380611	-0.0199642	0.0199642	0.384728	0.227361	1.03741	0.0529887	1.03741	up	FBXO4	26272	0000209 // protein polyubiquitination // inferred from direct assay /// 0000723 // telomere maintenance // inferred from mutant phenotype /// 0006511 // ubiquitin-dependent protein catabolic process // inferred from direct assay /// 0016567 // protein ubiquitination // inferred from direct assay /// 0016567 // protein ubiquitination // inferred from electronic annotation /// 0031146 // SCF-depend…	0000151 // ubiquitin ligase complex // inferred from direct assay /// 0005737 // cytoplasm // inferred from electronic annotation /// 0019005 // SCF ubiquitin ligase complex // inferred from direct assay	0004842 // ubiquitin-protein ligase activity // inferred from direct assay /// 0005515 // protein binding // inferred from physical interaction /// 0042803 // protein homodimerization activity // inferred from physical interaction	chr5:41925355-41935423 (+) // 83.91 // p13.1
11745745_a_at	-0.0740366	0.0193338	-0.0193338	0.247067	0.201882	-0.0217667	0.257139	0.128551	-1.12278	-0.167073	1.12278	down	SLC39A1	27173	0006810 // transport // inferred from electronic annotation /// 0006811 // ion transport // inferred from electronic annotation /// 0006812 // cation transport // traceable author statement /// 0006829 // zinc ion transport // inferred from electronic annotation /// 0030001 // metal ion transport // inferred from electronic annotation /// 0055085 // transmembrane transport // traceable author sta…	0005624 // membrane fraction // traceable author statement /// 0005783 // endoplasmic reticulum // inferred from electronic annotation /// 0005789 // endoplasmic reticulum membrane // inferred from electronic annotation /// 0005886 // plasma membrane // inferred from direct assay /// 0005886 // plasma membrane // traceable author statement /// 0005886 // plasma membrane // inferred from electroni…	0005102 // receptor binding // inferred from electronic annotation /// 0005385 // zinc ion transmembrane transporter activity // inferred from electronic annotation /// 0022890 // inorganic cation transmembrane transporter activity // traceable author statement /// 0046873 // metal ion transmembrane transporter activity // inferred from electronic annotation	chr1:153931651-153940097 (-) // 92.53 // q21.3
11716949_s_at	0.0922403	0.0774879	0.160439	-0.163975	-0.249962	-0.0774879	0.0333398	0.00807997	1.20904	0.273864	1.20904	up	TM9SF3	56889		0016020 // membrane // inferred from electronic annotation /// 0016021 // integral to membrane // inferred from electronic annotation	0005488 // binding // inferred from direct assay	chr10:98277867-98346797 (-) // 96.48 // q24.1
11715860_a_at	0.101063	-0.0408134	0.0408134	0.101171	-0.0582218	-0.16835	0.602356	0.441167	1.05372	0.075488	1.05372	up	RIC8A	60626	0001701 // in utero embryonic development // inferred from electronic annotation /// 0008542 // visual learning // inferred from electronic annotation /// 0009416 // response to light stimulus // inferred from electronic annotation /// 0043547 // positive regulation of GTPase activity // inferred from electronic annotation	0005737 // cytoplasm // inferred from sequence or structural similarity /// 0005737 // cytoplasm // inferred from electronic annotation /// 0005886 // plasma membrane // inferred from sequence or structural similarity /// 0005886 // plasma membrane // inferred from electronic annotation /// 0016020 // membrane // inferred from electronic annotation	0001965 // G-protein alpha-subunit binding // inferred from electronic annotation /// 0005085 // guanyl-nucleotide exchange factor activity // inferred from electronic annotation /// 0005096 // GTPase activator activity // inferred from electronic annotation	chr11:207118-215113 (+) // 82.86 // p15.5
11753470_a_at	0.0167251	-0.0167251	0.0359807	0.0535064	-0.0333619	-0.0439115	0.731865	0.594613	1.0139	0.0199159	1.0139	up	TIA1	7072	0006915 // apoptotic process // inferred from electronic annotation /// 0006917 // induction of apoptosis // traceable author statement /// 0017148 // negative regulation of translation // inferred from electronic annotation /// 0042036 // negative regulation of cytokine biosynthetic process // inferred from electronic annotation /// 0048024 // regulation of nuclear mRNA splicing, via spliceosome…	0005634 // nucleus // inferred from electronic annotation /// 0005737 // cytoplasm // inferred from electronic annotation	0000166 // nucleotide binding // inferred from electronic annotation /// 0003676 // nucleic acid binding // inferred from electronic annotation /// 0003723 // RNA binding // inferred from electronic annotation /// 0005515 // protein binding // inferred from physical interaction /// 0008143 // poly(A) RNA binding // traceable author statement /// 0017091 // AU-rich element binding // inferred from…	chr2:70443805-70475586 (-) // 95.68 // p13.3
11737412_at	-0.0466535	0.228784	0.0211673	-0.0211673	0.0656424	-0.0506949	0.637293	0.480676	1.0496	0.0698391	1.0496	up	SCML4	256380	0006351 // transcription, DNA-dependent // inferred from electronic annotation /// 0006355 // regulation of transcription, DNA-dependent // inferred from electronic annotation	0005634 // nucleus // inferred from electronic annotation	0003677 // DNA binding // inferred from electronic annotation	chr6:108023360-108145521 (-) // 84.48 // q21
11733237_a_at	-0.194019	-0.313808	-0.552797	0.34031	0.304111	0.194019	0.0241179	0.00519076	-1.55081	-0.633021	1.55081	down	RPGRIP1L	23322	0001701 // in utero embryonic development // inferred from electronic annotation /// 0001822 // kidney development // inferred from electronic annotation /// 0001889 // liver development // inferred from electronic annotation /// 0007368 // determination of left/right symmetry // inferred from electronic annotation /// 0007420 // brain development // inferred from electronic annotation /// 000858…	0005737 // cytoplasm // inferred from direct assay /// 0005737 // cytoplasm // inferred from electronic annotation /// 0005813 // centrosome // inferred from direct assay /// 0005815 // microtubule organizing center // inferred from electronic annotation /// 0005856 // cytoskeleton // inferred from electronic annotation /// 0005911 // cell-cell junction // inferred from direct assay /// 0005923 /…	0005515 // protein binding // inferred from physical interaction /// 0031870 // thromboxane A2 receptor binding // inferred from physical interaction	chr16:53633817-53737742 (-) // 96.81 // q12.2
11732837_a_at	0.0742598	-0.00818729	0.103993	-0.187243	0.00818729	-0.199722	0.168408	0.0718091	1.1352	0.182948	1.1352	up	IL37	27178	0001960 // negative regulation of cytokine-mediated signaling pathway // inferred from electronic annotation /// 0006955 // immune response // non-traceable author statement	0005576 // extracellular region // non-traceable author statement /// 0005576 // extracellular region // traceable author statement /// 0005576 // extracellular region // inferred from electronic annotation /// 0005615 // extracellular space // inferred from electronic annotation /// 0005634 // nucleus // inferred from electronic annotation /// 0005737 // cytoplasm // inferred from electronic ann…	0005125 // cytokine activity // inferred from electronic annotation /// 0005149 // interleukin-1 receptor binding // non-traceable author statement /// 0005149 // interleukin-1 receptor binding // traceable author statement /// 0005152 // interleukin-1 receptor antagonist activity // inferred from electronic annotation	chr2:113670547-113676459 (+) // 95.9 // q13
11747580_a_at	0.0334559	0.0926557	-0.0205498	-0.0466571	0.0205503	-0.32108	0.399757	0.240156	1.11027	0.150916	1.11027	up	PGS1	9489	0006655 // phosphatidylglycerol biosynthetic process // inferred from sequence or structural similarity /// 0006655 // phosphatidylglycerol biosynthetic process // inferred from electronic annotation /// 0008152 // metabolic process // inferred from electronic annotation /// 0008654 // phospholipid biosynthetic process // inferred from electronic annotation /// 0032049 // cardiolipin biosynthetic…	0005739 // mitochondrion // inferred from sequence or structural similarity /// 0005739 // mitochondrion // inferred from electronic annotation /// 0005743 // mitochondrial inner membrane // traceable author statement /// 0005783 // endoplasmic reticulum // inferred from direct assay	0000166 // nucleotide binding // inferred from electronic annotation /// 0003824 // catalytic activity // inferred from electronic annotation /// 0005509 // calcium ion binding // inferred from sequence or structural similarity /// 0005524 // ATP binding // inferred from electronic annotation /// 0008444 // CDP-diacylglycerol-glycerol-3-phosphate 3-phosphatidyltransferase activity // inferred fro…	chr17:76374731-76420637 (+) // 98.17 // q25.3
11744584_a_at	0.0624142	-0.0133801	-0.0206976	0.0133801	-0.0771866	0.0349722	0.797805	0.683482	1.0133	0.019057	1.0133	up	HYI	81888			0008903 // hydroxypyruvate isomerase activity // inferred from electronic annotation /// 0016853 // isomerase activity // inferred from electronic annotation	chr1:43916277-43919346 (-) // 92.28 // p34.2
11720005_at	-0.0647235	0.190914	-0.179363	-0.0117946	0.0490994	0.0117946	0.86187	0.773818	-1.02391	-0.0340907	1.02391	down	NPTX2	4885	0007268 // synaptic transmission // non-traceable author statement	0005576 // extracellular region // inferred from electronic annotation	0030246 // carbohydrate binding // inferred from electronic annotation /// 0046872 // metal ion binding // inferred from electronic annotation	chr7:98246596-98259181 (+) // 94.95 // q22.1
11731753_a_at	0.00533915	-0.241159	-0.0148845	0.263923	-0.00533915	0.0858312	0.288086	0.150613	-1.1474	-0.198373	1.1474	down	ZNF577	84765	0006351 // transcription, DNA-dependent // inferred from electronic annotation /// 0006355 // regulation of transcription, DNA-dependent // inferred from electronic annotation	0005622 // intracellular // inferred from electronic annotation /// 0005634 // nucleus // inferred from electronic annotation	0003676 // nucleic acid binding // inferred from electronic annotation /// 0003677 // DNA binding // inferred from electronic annotation /// 0008270 // zinc ion binding // inferred from electronic annotation /// 0046872 // metal ion binding // inferred from electronic annotation	chr19:52374552-52391229 (-) // 79.47 // q13.41
11758622_s_at	0.0153074	-0.0516434	-0.0136843	0.0096817	-0.0096817	0.0319376	0.463302	0.297177	-1.01912	-0.0273193	1.01912	down	MXRA7	439921		0016020 // membrane // inferred from electronic annotation /// 0016021 // integral to membrane // inferred from electronic annotation		chr17:74675651-74676010 (-) // 99.72 // q25.1 /// chr2:162196027-162196386 (-) // 99.16 // q24.2
11762600_a_at	-0.014472	0.123359	0.014472	0.205628	-0.0586014	-0.0830646	0.914469	0.854856	1.01382	0.0197987	1.01382	up	SEC31B	25956	0006810 // transport // inferred from electronic annotation /// 0015031 // protein transport // inferred from electronic annotation /// 0016192 // vesicle-mediated transport // inferred from electronic annotation	0005737 // cytoplasm // inferred from electronic annotation /// 0005739 // mitochondrion // inferred from electronic annotation /// 0005783 // endoplasmic reticulum // inferred from electronic annotation /// 0005789 // endoplasmic reticulum membrane // inferred from electronic annotation /// 0012507 // ER to Golgi transport vesicle membrane // inferred from electronic annotation /// 0016020 // me…	0003954 // NADH dehydrogenase activity // inferred from electronic annotation /// 0008137 // NADH dehydrogenase (ubiquinone) activity // inferred from electronic annotation	chr10:102265384-102289628 (-) // 99.9 // q24.31
11736940_at	-0.0624428	-0.213451	0.018363	0.190663	0.061172	-0.018363	0.283706	0.147307	-1.12013	-0.163668	1.12013	down	CHRNB4	1143	0001508 // regulation of action potential // inferred from electronic annotation /// 0006810 // transport // inferred from electronic annotation /// 0006811 // ion transport // traceable author statement /// 0006811 // ion transport // inferred from electronic annotation /// 0006939 // smooth muscle contraction // inferred from electronic annotation /// 0006940 // regulation of smooth muscle cont…	0005886 // plasma membrane // traceable author statement /// 0005886 // plasma membrane // inferred from electronic annotation /// 0005887 // integral to plasma membrane // inferred by curator /// 0005892 // acetylcholine-gated channel complex // inferred from direct assay /// 0005892 // acetylcholine-gated channel complex // traceable author statement /// 0005892 // acetylcholine-gated channel c…	0004872 // receptor activity // inferred from electronic annotation /// 0004889 // acetylcholine-activated cation-selective channel activity // traceable author statement /// 0004889 // acetylcholine-activated cation-selective channel activity // inferred from electronic annotation /// 0005216 // ion channel activity // inferred from electronic annotation /// 0005230 // extracellular ligand-gated…	chr15:78916514-78933587 (-) // 73.27 // q25.1
11741412_at	0.151487	0.178822	-0.138306	-0.161183	-0.0855551	0.0855551	0.564396	0.39955	1.08503	0.117729	1.08503	up	LHX9	56956	0006355 // regulation of transcription, DNA-dependent // inferred from electronic annotation /// 0008045 // motor axon guidance // inferred from sequence or structural similarity /// 0008283 // cell proliferation // inferred from electronic annotation /// 0008584 // male gonad development // inferred from electronic annotation /// 0008585 // female gonad development // inferred from electronic an…	0005634 // nucleus // inferred from electronic annotation	0003677 // DNA binding // inferred from electronic annotation /// 0003700 // sequence-specific DNA binding transcription factor activity // inferred from electronic annotation /// 0003714 // transcription corepressor activity // inferred from sequence or structural similarity /// 0008270 // zinc ion binding // inferred from electronic annotation /// 0043565 // sequence-specific DNA binding // inf…	chr1:197886516-197899273 (+) // 97.89 // q31.3
11753606_x_at	0.0247307	-0.000197411	0.00297737	-0.0763473	0.000197411	-0.0235224	0.289028	0.151299	1.02982	0.0423943	1.02982	up	CDC42	998	0001934 // positive regulation of protein phosphorylation // inferred from electronic annotation /// 0003334 // keratinocyte development // inferred from electronic annotation /// 0006184 // GTP catabolic process // traceable author statement /// 0006184 // GTP catabolic process // inferred from electronic annotation /// 0007030 // Golgi organization // inferred from sequence or structural simila…	0000139 // Golgi membrane // inferred from electronic annotation /// 0000139 // Golgi membrane // inferred from sequence or structural similarity /// 0005622 // intracellular // inferred from electronic annotation /// 0005737 // cytoplasm // inferred from direct assay /// 0005737 // cytoplasm // inferred from electronic annotation /// 0005815 // microtubule organizing center // inferred from elec…	0000166 // nucleotide binding // inferred from electronic annotation /// 0003924 // GTPase activity // inferred from electronic annotation /// 0003924 // GTPase activity // traceable author statement /// 0005515 // protein binding // inferred from physical interaction /// 0005525 // GTP binding // inferred from electronic annotation /// 0019901 // protein kinase binding // inferred from direct as…	chr1:22404971-22418010 (+) // 100.0 // p36.12 /// chr4:22728997-22729573 (-) // 98.96 // p15.2
11761646_at	-0.0664978	0.0161457	-0.472092	0.0498776	-0.0161457	0.156116	0.363597	0.209649	-1.17889	-0.237431	1.17889	down	SRGAP3	9901	0007165 // signal transduction // inferred from electronic annotation /// 0007264 // small GTPase mediated signal transduction // traceable author statement /// 0043547 // positive regulation of GTPase activity // inferred from electronic annotation /// 0051056 // regulation of small GTPase mediated signal transduction // traceable author statement	0005622 // intracellular // inferred from electronic annotation /// 0005829 // cytosol // traceable author statement	0005096 // GTPase activator activity // inferred from electronic annotation	chr3:9048662-9166601 (-) // 80.34 // p25.3
11718707_a_at	-0.00541043	-0.0153008	-0.127444	0.0241046	0.00541067	0.108626	0.260946	0.131189	-1.06839	-0.0954321	1.06839	down	IGF1R	3480	0006468 // protein phosphorylation // inferred from electronic annotation /// 0006916 // anti-apoptosis // traceable author statement /// 0006955 // immune response // inferred from mutant phenotype /// 0007165 // signal transduction // traceable author statement /// 0007169 // transmembrane receptor protein tyrosine kinase signaling pathway // inferred from electronic annotation /// 0007409 // a…	0005792 // microsome // inferred from direct assay /// 0005886 // plasma membrane // inferred from electronic annotation /// 0005887 // integral to plasma membrane // inferred by curator /// 0005901 // caveola // inferred from electronic annotation /// 0016020 // membrane // inferred from direct assay /// 0016020 // membrane // inferred from electronic annotation /// 0016021 // integral to membra…	0000166 // nucleotide binding // inferred from electronic annotation /// 0004672 // protein kinase activity // inferred from electronic annotation /// 0004713 // protein tyrosine kinase activity // inferred from direct assay /// 0004713 // protein tyrosine kinase activity // inferred from electronic annotation /// 0004714 // transmembrane receptor protein tyrosine kinase activity // inferred from…	chr15:99192272-99507759 (+) // 97.28 // q26.3
11722086_x_at	-0.0408192	0.220156	0.0767868	-0.0501142	-0.0463455	0.0408192	0.432565	0.269268	1.07469	0.103921	1.07469	up	SEPT1	1731	0007049 // cell cycle // inferred from electronic annotation /// 0051301 // cell division // inferred from electronic annotation	0005737 // cytoplasm // inferred from electronic annotation /// 0005815 // microtubule organizing center // inferred from electronic annotation /// 0005856 // cytoskeleton // inferred from electronic annotation /// 0031105 // septin complex // inferred from electronic annotation	0000166 // nucleotide binding // inferred from electronic annotation /// 0005515 // protein binding // inferred from physical interaction /// 0005525 // GTP binding // inferred from electronic annotation	chr16:30389455-30394171 (-) // 96.24 // p11.2
11742820_s_at	0.00995088	-0.0184996	-0.00995088	-0.0957902	0.117076	0.106492	0.672617	0.523142	-1.03437	-0.0487591	1.03437	down	OGN	4969	0048662 // negative regulation of smooth muscle cell proliferation // inferred from sequence or structural similarity	0005576 // extracellular region // inferred from electronic annotation /// 0005578 // proteinaceous extracellular matrix // inferred from electronic annotation /// 0005615 // extracellular space // inferred from direct assay /// 0005783 // endoplasmic reticulum // inferred from direct assay /// 0031012 // extracellular matrix // inferred from direct assay	0005515 // protein binding // inferred from physical interaction /// 0008083 // growth factor activity // inferred from electronic annotation	chr9:95146099-95166937 (-) // 99.63 // q22.31
11740952_at	0.0103755	0.0545995	-0.0799587	-0.0103755	-0.0867837	0.0103755	0.775747	0.653393	1.01673	0.0239333	1.01673	up	OTUD7A	161725	0006508 // proteolysis // inferred from electronic annotation	0005634 // nucleus // inferred from electronic annotation /// 0005737 // cytoplasm // inferred from electronic annotation	0003677 // DNA binding // inferred from electronic annotation /// 0008233 // peptidase activity // inferred from electronic annotation /// 0008234 // cysteine-type peptidase activity // inferred from electronic annotation /// 0008270 // zinc ion binding // inferred from electronic annotation /// 0016787 // hydrolase activity // inferred from electronic annotation /// 0046872 // metal ion binding …	chr15:31775328-31947542 (-) // 88.66 // q13.3
11746041_a_at	-0.0208616	0.0986319	0.00286865	0.0162296	-0.00286865	-0.0357656	0.596009	0.434195	1.02409	0.0343478	1.02409	up	TRA2B	6434	0000375 // RNA splicing, via transesterification reactions // traceable author statement /// 0000381 // regulation of alternative nuclear mRNA splicing, via spliceosome // inferred from direct assay /// 0000398 // nuclear mRNA splicing, via spliceosome // inferred from direct assay /// 0006397 // mRNA processing // inferred from electronic annotation /// 0008380 // RNA splicing // inferred from e…	0005634 // nucleus // inferred from direct assay /// 0005634 // nucleus // inferred from electronic annotation	0000166 // nucleotide binding // inferred from electronic annotation /// 0003676 // nucleic acid binding // inferred from electronic annotation /// 0003723 // RNA binding // inferred from electronic annotation /// 0003729 // mRNA binding // inferred from direct assay /// 0005515 // protein binding // inferred from physical interaction	chr3:185634536-185655818 (-) // 94.9 // q27.2
11762973_at	-0.0566821	-0.0786755	-0.0610592	0.0609031	0.182988	0.0566821	0.0571652	0.0168423	-1.12168	-0.165663	1.12168	down				0005576 // extracellular region // inferred from electronic annotation		chr2:31393687-31394575 (-) // 65.65 // p23.1
11744564_a_at	0.100359	-0.058516	0.058516	-0.142046	0.0782185	-0.0781674	0.540202	0.374395	1.05759	0.0807848	1.05759	up	PPWD1	23398	0000398 // nuclear mRNA splicing, via spliceosome // inferred by curator /// 0000413 // protein peptidyl-prolyl isomerization // inferred from electronic annotation /// 0006397 // mRNA processing // inferred from electronic annotation /// 0006457 // protein folding // inferred from electronic annotation /// 0008380 // RNA splicing // inferred from electronic annotation	0005634 // nucleus // inferred from direct assay /// 0005634 // nucleus // inferred from electronic annotation /// 0005681 // spliceosomal complex // inferred from electronic annotation /// 0071013 // catalytic step 2 spliceosome // inferred from direct assay	0003755 // peptidyl-prolyl cis-trans isomerase activity // inferred from electronic annotation /// 0016853 // isomerase activity // inferred from electronic annotation	chr5:64859125-64883376 (+) // 99.43 // q12.3
11759054_at	-0.0331042	-0.0805156	0.11435	-0.15228	0.0331042	0.27136	0.830862	0.729167	-1.03561	-0.0504847	1.03561	down	DEFB126	81623	0006952 // defense response // inferred from electronic annotation /// 0042742 // defense response to bacterium // inferred from electronic annotation	0005576 // extracellular region // inferred from electronic annotation /// 0009986 // cell surface // inferred from electronic annotation /// 0030112 // glycocalyx // inferred from electronic annotation		chr20:123009-126392 (+) // 91.23 // p13
11720104_a_at	0.214199	0.132983	0.173191	-0.214149	-0.132983	-0.186288	0.00468766	0.00046312	1.27568	0.351264	1.27568	up	PAK1	5058	0000165 // MAPK cascade // inferred from direct assay /// 0001666 // response to hypoxia // inferred from electronic annotation /// 0006468 // protein phosphorylation // inferred from direct assay /// 0006468 // protein phosphorylation // inferred from electronic annotation /// 0006915 // apoptotic process // inferred from electronic annotation /// 0007411 // axon guidance // traceable author sta…	0001726 // ruffle // inferred from direct assay /// 0005624 // membrane fraction // inferred from electronic annotation /// 0005634 // nucleus // inferred from electronic annotation /// 0005737 // cytoplasm // inferred from direct assay /// 0005737 // cytoplasm // inferred from electronic annotation /// 0005794 // Golgi apparatus // inferred from direct assay /// 0005829 // cytosol // traceable a…	0000166 // nucleotide binding // inferred from electronic annotation /// 0003824 // catalytic activity // inferred from electronic annotation /// 0004672 // protein kinase activity // inferred from direct assay /// 0004672 // protein kinase activity // inferred from electronic annotation /// 0004674 // protein serine/threonine kinase activity // inferred from direct assay /// 0004674 // protein s…	chr11:77032591-77185365 (-) // 85.0 // q13.5
11731540_at	-0.0658007	-0.0735087	-0.144437	0.0658007	0.250449	0.117797	0.0566904	0.01666	-1.18039	-0.239264	1.18039	down	SESTD1	91404	0051925 // regulation of calcium ion transport via voltage-gated calcium channel activity // inferred from mutant phenotype	0034704 // calcium channel complex // inferred from physical interaction	0001786 // phosphatidylserine binding // inferred from direct assay /// 0005515 // protein binding // inferred from physical interaction /// 0005545 // 1-phosphatidylinositol binding // inferred from direct assay /// 0005546 // phosphatidylinositol-4,5-bisphosphate binding // inferred from direct assay /// 0010314 // phosphatidylinositol-5-phosphate binding // inferred from direct assay /// 00312…	chr2:179966420-180129517 (-) // 86.67 // q31.2
11725347_a_at	0.0439148	-0.0746393	-0.0133801	-0.0917902	0.0133801	0.049963	0.959151	0.928393	-1.00362	-0.00521916	1.00362	down	TFDP1	7027	0000080 // G1 phase of mitotic cell cycle // traceable author statement /// 0000082 // G1/S transition of mitotic cell cycle // traceable author statement /// 0000278 // mitotic cell cycle // traceable author statement /// 0006351 // transcription, DNA-dependent // inferred from electronic annotation /// 0006355 // regulation of transcription, DNA-dependent // inferred from electronic annotation …	0005634 // nucleus // inferred from electronic annotation /// 0005654 // nucleoplasm // traceable author statement /// 0005667 // transcription factor complex // inferred from electronic annotation	0003677 // DNA binding // inferred from electronic annotation /// 0003700 // sequence-specific DNA binding transcription factor activity // inferred from electronic annotation /// 0003700 // sequence-specific DNA binding transcription factor activity // traceable author statement /// 0003713 // transcription coactivator activity // traceable author statement /// 0005515 // protein binding // infe…	chr13:114238987-114295788 (+) // 90.18 // q34
11755375_a_at	-0.101084	0.261208	-0.126887	0.101084	-0.176248	0.112109	0.996509	0.994088	-1.00086	-0.0012362	1.00086	down	DGKH	160851	0007205 // protein kinase C-activating G-protein coupled receptor signaling pathway // inferred from mutant phenotype /// 0007205 // protein kinase C-activating G-protein coupled receptor signaling pathway // inferred from electronic annotation /// 0007596 // blood coagulation // traceable author statement /// 0016310 // phosphorylation // inferred from electronic annotation /// 0030168 // platel…	0005622 // intracellular // inferred from electronic annotation /// 0005634 // nucleus // inferred from direct assay /// 0005737 // cytoplasm // inferred from direct assay /// 0005737 // cytoplasm // inferred from electronic annotation /// 0005768 // endosome // inferred from direct assay /// 0005886 // plasma membrane // traceable author statement /// 0005886 // plasma membrane // inferred from …	0000166 // nucleotide binding // inferred from electronic annotation /// 0004143 // diacylglycerol kinase activity // inferred from mutant phenotype /// 0004143 // diacylglycerol kinase activity // inferred from electronic annotation /// 0005524 // ATP binding // inferred from electronic annotation /// 0005543 // phospholipid binding // inferred from electronic annotation /// 0016301 // kinase ac…	chr13:42729424-42803386 (+) // 96.93 // q14.11
11727314_a_at	-0.0280657	-0.0999813	-0.0751796	0.0280662	0.0367393	0.0546217	0.0352792	0.00876574	-1.0774	-0.107551	1.0774	down	ABCC5	10057	0006200 // ATP catabolic process // inferred from electronic annotation /// 0006810 // transport // traceable author statement /// 0006810 // transport // inferred from electronic annotation /// 0015711 // organic anion transport // traceable author statement /// 0032496 // response to lipopolysaccharide // inferred from electronic annotation /// 0032868 // response to insulin stimulus // inferre…	0005624 // membrane fraction // inferred from direct assay /// 0005624 // membrane fraction // traceable author statement /// 0005886 // plasma membrane // traceable author statement /// 0005887 // integral to plasma membrane // traceable author statement /// 0016020 // membrane // inferred from electronic annotation /// 0016021 // integral to membrane // inferred from electronic annotation /// 0…	0000166 // nucleotide binding // inferred from electronic annotation /// 0005524 // ATP binding // inferred from electronic annotation /// 0005524 // ATP binding // traceable author statement /// 0008514 // organic anion transmembrane transporter activity // traceable author statement /// 0016887 // ATPase activity // inferred from electronic annotation /// 0017111 // nucleoside-triphosphatase ac…	chr3:183637721-183735803 (-) // 99.16 // q27.1
11745576_at	-0.13591	0.00303173	-0.00479317	-0.00303173	0.125014	0.0431261	0.301054	0.160062	-1.07246	-0.100926	1.07246	down	KIRREL3-AS3	283165				chr11:126872804-126875953 (+) // 93.56 // q24.2
11739591_s_at	0.0301008	0.120989	0.0498991	-0.0301008	-0.0852089	-0.0459957	0.0643232	0.0197143	1.08731	0.120765	1.08731	up	MINA	84864	0042254 // ribosome biogenesis // inferred from electronic annotation	0005634 // nucleus // inferred from direct assay /// 0005634 // nucleus // inferred from electronic annotation /// 0005730 // nucleolus // inferred from direct assay /// 0005730 // nucleolus // inferred from electronic annotation /// 0005737 // cytoplasm // inferred from direct assay		chr3:97660660-97691295 (-) // 99.04 // q11.2
11718486_a_at	0.0800505	0.123693	0.114545	-0.0920086	-0.12379	-0.0800505	0.00423191	0.000389412	1.15246	0.204712	1.15246	up	EI24	9538	0006914 // autophagy // inferred from electronic annotation /// 0006915 // apoptotic process // inferred from electronic annotation /// 0006917 // induction of apoptosis // inferred from electronic annotation /// 0006917 // induction of apoptosis // traceable author statement /// 0030308 // negative regulation of cell growth // inferred from direct assay /// 0042493 // response to drug // inferre…	0005634 // nucleus // inferred from electronic annotation /// 0005737 // cytoplasm // inferred from electronic annotation /// 0005783 // endoplasmic reticulum // inferred from electronic annotation /// 0005789 // endoplasmic reticulum membrane // inferred from electronic annotation /// 0016020 // membrane // inferred from electronic annotation /// 0016021 // integral to membrane // inferred from …		chr11:125439111-125454579 (+) // 93.48 // q24.2
11736828_x_at	0.283691	0.225452	0.268021	-0.271381	-0.225452	-0.266141	0.000909349	2.24783e-05	1.42739	0.513379	1.42739	up	ST3GAL1	6482	0006464 // cellular protein modification process // traceable author statement /// 0006468 // protein phosphorylation // inferred from electronic annotation /// 0006486 // protein glycosylation // inferred from electronic annotation /// 0016266 // O-glycan processing // traceable author statement /// 0043687 // post-translational protein modification // traceable author statement /// 0044267 // c…	0000139 // Golgi membrane // traceable author statement /// 0005576 // extracellular region // inferred from electronic annotation /// 0005794 // Golgi apparatus // inferred from electronic annotation /// 0016020 // membrane // inferred from electronic annotation /// 0016021 // integral to membrane // inferred from electronic annotation /// 0030173 // integral to Golgi membrane // inferred from e…	0003836 // beta-galactoside (CMP) alpha-2,3-sialyltransferase activity // inferred from electronic annotation /// 0003836 // beta-galactoside (CMP) alpha-2,3-sialyltransferase activity // traceable author statement /// 0008373 // sialyltransferase activity // inferred from electronic annotation /// 0016740 // transferase activity // inferred from electronic annotation /// 0016757 // transferase a…	chr8:134467090-134584183 (-) // 90.59 // q24.22
11717923_s_at	-0.013257	-0.00104237	-0.0643825	0.170733	0.0811138	0.00104237	0.221399	0.104032	-1.07962	-0.110524	1.07962	down	YAP1	10413	0001570 // vasculogenesis // inferred from electronic annotation /// 0006351 // transcription, DNA-dependent // inferred from electronic annotation /// 0006355 // regulation of transcription, DNA-dependent // inferred from electronic annotation /// 0006357 // regulation of transcription from RNA polymerase II promoter // inferred from electronic annotation /// 0006366 // transcription from RNA po…	0005634 // nucleus // inferred from direct assay /// 0005634 // nucleus // inferred from electronic annotation /// 0005654 // nucleoplasm // traceable author statement /// 0005737 // cytoplasm // inferred from direct assay /// 0005737 // cytoplasm // inferred from electronic annotation /// 0005829 // cytosol // traceable author statement	0001076 // RNA polymerase II transcription factor binding transcription factor activity // inferred from electronic annotation /// 0003682 // chromatin binding // inferred from electronic annotation /// 0003713 // transcription coactivator activity // inferred from direct assay /// 0003713 // transcription coactivator activity // inferred from electronic annotation /// 0003714 // transcription co…	chr11:101981209-102104149 (+) // 91.79 // q22.1
11724546_at	-0.1036	0.0394664	-0.00330639	0.0285568	0.00330639	-0.163199	0.870268	0.786651	1.01487	0.0212986	1.01487	up	HCFC2	29915	0000122 // negative regulation of transcription from RNA polymerase II promoter // inferred from sequence or structural similarity /// 0006357 // regulation of transcription from RNA polymerase II promoter // traceable author statement /// 0016032 // viral reproduction // traceable author statement	0005634 // nucleus // inferred from electronic annotation /// 0005634 // nucleus // inferred from direct assay /// 0005737 // cytoplasm // inferred from direct assay /// 0005737 // cytoplasm // inferred from electronic annotation	0003713 // transcription coactivator activity // traceable author statement	chr12:104458234-104500299 (+) // 97.11 // q23.3
11730716_a_at	0.0131097	-0.0131099	-0.22854	-0.174978	0.144239	0.0997138	0.631712	0.474574	-1.07116	-0.0991717	1.07116	down	PAGE5	90737				chrX:55246788-55250533 (+) // 87.59 // p11.21
11730612_a_at	-0.150769	-0.339489	-0.147185	0.264968	0.153904	0.147185	0.0256487	0.00564276	-1.32058	-0.401167	1.32058	down	MBOAT7	79143	0006644 // phospholipid metabolic process // inferred from electronic annotation /// 0008654 // phospholipid biosynthetic process // inferred from electronic annotation	0016020 // membrane // inferred from electronic annotation /// 0016021 // integral to membrane // inferred from electronic annotation	0004872 // receptor activity // inferred from electronic annotation /// 0016740 // transferase activity // inferred from electronic annotation /// 0016746 // transferase activity, transferring acyl groups // inferred from electronic annotation /// 0016747 // transferase activity, transferring acyl groups other than amino-acyl groups // inferred from electronic annotation	chr19:54681993-54693733 (-) // 82.66 // q13.42
11718387_s_at	0.1022	-0.0705719	-0.0402813	-0.0220032	0.0220032	0.0405998	0.869508	0.785471	-1.01144	-0.0164178	1.01144	down	ZFYVE20	64145	0006810 // transport // inferred from electronic annotation /// 0007596 // blood coagulation // traceable author statement /// 0015031 // protein transport // inferred from electronic annotation /// 0016197 // endosomal transport // non-traceable author statement	0005622 // intracellular // inferred from electronic annotation /// 0005768 // endosome // non-traceable author statement /// 0005768 // endosome // inferred from electronic annotation /// 0005886 // plasma membrane // inferred from electronic annotation /// 0010008 // endosome membrane // traceable author statement /// 0016020 // membrane // inferred from electronic annotation /// 0031901 // ear…	0005515 // protein binding // inferred from physical interaction /// 0008270 // zinc ion binding // non-traceable author statement /// 0008270 // zinc ion binding // inferred from electronic annotation /// 0017137 // Rab GTPase binding // inferred from electronic annotation /// 0046872 // metal ion binding // inferred from electronic annotation	chr3:15111579-15140664 (-) // 84.74 // p25.1
11715842_a_at	-0.137078	-0.221043	-0.172604	0.137078	0.200656	0.163614	0.00397848	0.000353348	-1.26929	-0.344024	1.26929	down	MAPK1	5594	0000165 // MAPK cascade // traceable author statement /// 0000165 // MAPK cascade // inferred from electronic annotation /// 0000186 // activation of MAPKK activity // traceable author statement /// 0000187 // activation of MAPK activity // traceable author statement /// 0000189 // MAPK import into nucleus // inferred from electronic annotation /// 0002224 // toll-like receptor signaling pathway …	0005625 // soluble fraction // inferred from electronic annotation /// 0005626 // insoluble fraction // inferred from electronic annotation /// 0005634 // nucleus // traceable author statement /// 0005634 // nucleus // inferred from electronic annotation /// 0005654 // nucleoplasm // traceable author statement /// 0005654 // nucleoplasm // inferred from electronic annotation /// 0005737 // cytopl…	0000166 // nucleotide binding // inferred from electronic annotation /// 0001784 // phosphotyrosine binding // inferred from electronic annotation /// 0003677 // DNA binding // inferred from electronic annotation /// 0004672 // protein kinase activity // inferred from electronic annotation /// 0004674 // protein serine/threonine kinase activity // inferred from direct assay /// 0004674 // protein…	chr22:22108791-22221970 (-) // 87.22 // q11.21
11722863_at	0.022392	-0.0169733	0.210005	-0.0939248	0.0128732	-0.0128732	0.413427	0.25189	1.07409	0.103116	1.07409	up	SCGB2A1	4246			0005496 // steroid binding // inferred from electronic annotation /// 0005497 // androgen binding // non-traceable author statement	chr11:61976144-61981415 (+) // 94.72 // q12.3
11751154_x_at	-0.058907	-0.0267906	0.264656	-0.0690432	0.0267906	0.036149	0.735431	0.599317	1.04369	0.0616873	1.04369	up	ALDOC	230	0001666 // response to hypoxia // inferred from electronic annotation /// 0005975 // carbohydrate metabolic process // traceable author statement /// 0006000 // fructose metabolic process // traceable author statement /// 0006006 // glucose metabolic process // traceable author statement /// 0006094 // gluconeogenesis // traceable author statement /// 0006096 // glycolysis // inferred from electr…	0005737 // cytoplasm // inferred from electronic annotation /// 0005739 // mitochondrion // inferred from electronic annotation /// 0005829 // cytosol // traceable author statement /// 0005856 // cytoskeleton // inferred by curator /// 0030424 // axon // inferred from electronic annotation	0003824 // catalytic activity // inferred from electronic annotation /// 0004332 // fructose-bisphosphate aldolase activity // inferred from direct assay /// 0004332 // fructose-bisphosphate aldolase activity // inferred from electronic annotation /// 0005515 // protein binding // inferred from physical interaction /// 0008092 // cytoskeletal protein binding // inferred from direct assay /// 0016…	chr17:26900134-26903912 (-) // 99.42 // q11.2
11726904_a_at	-0.00651312	-0.0640697	0	0	0.00043869	0.033865	0.360171	0.206974	-1.02453	-0.0349621	1.02453	down	COBL	23242	0001843 // neural tube closure // inferred from electronic annotation		0003779 // actin binding // inferred from electronic annotation	chr7:51083909-51384515 (-) // 99.51 // p12.1
11753940_a_at	0.000144482	-0.285162	-0.000144482	0.193912	0.121843	-0.092771	0.41938	0.257096	-1.12458	-0.169382	1.12458	down	NRL	4901	0006351 // transcription, DNA-dependent // inferred from electronic annotation /// 0006355 // regulation of transcription, DNA-dependent // inferred from electronic annotation /// 0006366 // transcription from RNA polymerase II promoter // traceable author statement /// 0007275 // multicellular organismal development // inferred from electronic annotation /// 0007468 // regulation of rhodopsin ge…	0005634 // nucleus // inferred from electronic annotation /// 0005634 // nucleus // traceable author statement	0003677 // DNA binding // traceable author statement /// 0003677 // DNA binding // inferred from electronic annotation /// 0003700 // sequence-specific DNA binding transcription factor activity // inferred from electronic annotation /// 0043522 // leucine zipper domain binding // inferred from physical interaction /// 0043565 // sequence-specific DNA binding // inferred from electronic annotation	chr14:24549316-24584223 (-) // 91.15 // q11.2
11751357_a_at	-0.187623	-0.0880523	-0.241913	0.19046	0.145521	0.0880518	0.0212396	0.00433868	-1.24304	-0.313874	1.24304	down	MEI1	150365	0007126 // meiosis // inferred from electronic annotation /// 0007141 // male meiosis I // inferred from electronic annotation /// 0007276 // gamete generation // inferred from electronic annotation /// 0007286 // spermatid development // inferred from electronic annotation			chr22:42148507-42177849 (+) // 98.98 // q13.2
11727430_s_at	0.0343125	-0.0256884	-0.0391138	-0.0113027	0.0264897	0.0113027	0.645926	0.49138	-1.01325	-0.0189932	1.01325	down	C6orf162	57150		0016020 // membrane // inferred from electronic annotation /// 0016021 // integral to membrane // inferred from electronic annotation		chr6:88046724-88052041 (+) // 91.8 // q15
11721103_a_at	-0.100845	-0.119849	-0.118139	0.125418	0.193689	0.100844	0.00709499	0.00088208	-1.19162	-0.252928	1.19162	down	POLDIP3	84271	0006417 // regulation of translation // inferred from electronic annotation /// 0045727 // positive regulation of translation // inferred from mutant phenotype	0005634 // nucleus // inferred from direct assay /// 0005634 // nucleus // inferred from electronic annotation /// 0005730 // nucleolus // inferred from direct assay /// 0005737 // cytoplasm // traceable author statement /// 0005737 // cytoplasm // inferred from electronic annotation /// 0016607 // nuclear speck // inferred from direct assay /// 0016607 // nuclear speck // inferred from electroni…	0000166 // nucleotide binding // inferred from electronic annotation /// 0003676 // nucleic acid binding // inferred from electronic annotation /// 0003723 // RNA binding // inferred from electronic annotation /// 0005515 // protein binding // inferred from physical interaction	chr22:42979727-43010962 (-) // 99.49 // q13.2
11755049_a_at	0.105393	0.0599251	0.088747	-0.104532	-0.120781	-0.0599251	0.00937212	0.00133595	1.1327	0.179768	1.1327	up	PIK3C3	5289	0000045 // autophagic vacuole assembly // inferred from electronic annotation /// 0000910 // cytokinesis // inferred from mutant phenotype /// 0006468 // protein phosphorylation // inferred from electronic annotation /// 0006914 // autophagy // inferred from electronic annotation /// 0007032 // endosome organization // inferred from electronic annotation /// 0007049 // cell cycle // inferred from…	0005768 // endosome // inferred from electronic annotation /// 0005770 // late endosome // inferred from direct assay /// 0005770 // late endosome // inferred from electronic annotation /// 0005829 // cytosol // traceable author statement /// 0030496 // midbody // inferred from direct assay /// 0030496 // midbody // inferred from electronic annotation	0000166 // nucleotide binding // inferred from electronic annotation /// 0004672 // protein kinase activity // inferred from electronic annotation /// 0005515 // protein binding // inferred from physical interaction /// 0005524 // ATP binding // inferred from electronic annotation /// 0016301 // kinase activity // inferred from electronic annotation /// 0016303 // 1-phosphatidylinositol-3-kinase …	chr18:39605275-39661443 (+) // 79.99 // q12.3
11764109_at	0.00256133	-0.278202	-0.101225	0.136459	0.00218368	-0.00218368	0.276177	0.142013	-1.12592	-0.171108	1.12592	down						chr6:163789337-163789753 (-) // 99.52 // q26
11749470_a_at	0.0180893	-0.0887113	-0.0663128	0.226326	0.0708885	-0.0180893	0.289868	0.15192	-1.1009	-0.138687	1.1009	down	TRPM8	79054	0006810 // transport // inferred from electronic annotation /// 0006811 // ion transport // inferred from electronic annotation /// 0006816 // calcium ion transport // inferred from electronic annotation /// 0006874 // cellular calcium ion homeostasis // inferred from electronic annotation /// 0009266 // response to temperature stimulus // inferred from electronic annotation /// 0009409 // respon…	0009897 // external side of plasma membrane // inferred from electronic annotation /// 0016020 // membrane // inferred from electronic annotation /// 0016021 // integral to membrane // inferred from electronic annotation	0004872 // receptor activity // inferred from electronic annotation /// 0005216 // ion channel activity // inferred from electronic annotation /// 0005262 // calcium channel activity // inferred from electronic annotation /// 0042803 // protein homodimerization activity // inferred from electronic annotation	chr2:234826049-234925973 (+) // 96.93 // q37.1
11750933_a_at	-0.186184	-0.289678	-0.3242	0.489516	0.301838	0.186185	0.0190657	0.00372224	-1.50789	-0.592534	1.50789	down	ZNF480	147657	0006351 // transcription, DNA-dependent // inferred from electronic annotation /// 0006355 // regulation of transcription, DNA-dependent // inferred from electronic annotation	0005622 // intracellular // inferred from electronic annotation /// 0005634 // nucleus // inferred from direct assay /// 0005634 // nucleus // inferred from electronic annotation /// 0005730 // nucleolus // inferred from direct assay /// 0005737 // cytoplasm // inferred from direct assay	0003676 // nucleic acid binding // inferred from electronic annotation /// 0008270 // zinc ion binding // inferred from electronic annotation /// 0046872 // metal ion binding // inferred from electronic annotation	chr19:52800431-52826411 (+) // 95.51 // q13.41
11746026_x_at	-0.0104835	0.0104837	-0.0570712	0.121333	-0.125324	0.0201347	0.851584	0.759088	-1.01706	-0.0244048	1.01706	down	-0.0570712	MILR1	284021	0033004 // negative regulation of mast cell activation // inferred from sequence or structural similarity /// 0043303 // mast cell degranulation // inferred from sequence or structural similarity	0005886 // plasma membrane // inferred from electronic annotation /// 0005887 // integral to plasma membrane // non-traceable author statement /// 0016020 // membrane // inferred from electronic annotation /// 0016021 // integral to membrane // inferred from electronic annotation	0005515 // protein binding // inferred from sequence or structural similarity
11723087_at	-0.00750303	-0.00740147	-0.0503683	0.00740147	0.0641384	0.132511	0.186383	0.082198	-1.0642	-0.0897745	1.0642	down	GAS2L1	10634	0001578 // microtubule bundle formation // inferred from mutant phenotype /// 0007026 // negative regulation of microtubule depolymerization // inferred from mutant phenotype /// 0007050 // cell cycle arrest // inferred from sequence or structural similarity /// 0007050 // cell cycle arrest // inferred from electronic annotation /// 0009267 // cellular response to starvation // inferred from sequ…	0001725 // stress fiber // inferred from direct assay /// 0001725 // stress fiber // inferred from electronic annotation /// 0005737 // cytoplasm // inferred from direct assay /// 0005737 // cytoplasm // inferred from electronic annotation /// 0005856 // cytoskeleton // inferred from electronic annotation /// 0005874 // microtubule // inferred from direct assay /// 0005874 // microtubule // infer…	0008017 // microtubule binding // inferred from direct assay /// 0008093 // cytoskeletal adaptor activity // inferred from direct assay /// 0046966 // thyroid hormone receptor binding // inferred from direct assay	chr22:29702346-29708776 (+) // 89.67 // q12.2
11749176_a_at	0.125065	0.0896559	0.137441	-0.0896563	-0.214158	-0.128649	0.015179	0.00268717	1.19876	0.261541	1.19876	up	RIOK3	8780	0006468 // protein phosphorylation // inferred from electronic annotation /// 0007059 // chromosome segregation // traceable author statement /// 0016310 // phosphorylation // inferred from electronic annotation		0000166 // nucleotide binding // inferred from electronic annotation /// 0003824 // catalytic activity // inferred from electronic annotation /// 0004674 // protein serine/threonine kinase activity // inferred from electronic annotation /// 0005515 // protein binding // inferred from physical interaction /// 0005524 // ATP binding // inferred from electronic annotation /// 0016301 // kinase activ…	chr18:21033250-21061544 (+) // 99.95 // q11.2
11719577_a_at	-0.154639	0.133406	-0.0101166	0.036231	-0.00529289	0.00529242	0.880181	0.802008	-1.01574	-0.0225268	1.01574	down	AMT	275	0006546 // glycine catabolic process // inferred from electronic annotation /// 0006546 // glycine catabolic process // traceable author statement /// 0032259 // methylation // inferred from electronic annotation	0005737 // cytoplasm // inferred from electronic annotation /// 0005739 // mitochondrion // inferred from electronic annotation /// 0005739 // mitochondrion // traceable author statement	0004047 // aminomethyltransferase activity // inferred from electronic annotation /// 0008168 // methyltransferase activity // inferred from electronic annotation /// 0008483 // transaminase activity // inferred from electronic annotation /// 0016740 // transferase activity // inferred from electronic annotation	chr3:49454210-49460111 (-) // 94.96 // p21.31
11741646_s_at	-0.411373	-0.110418	0.109751	-0.0863495	0.0863495	0.0959387	0.52178	0.355543	-1.12453	-0.169326	1.12453	down	ATXN7L1	222255				chr7:105245220-105319653 (-) // 98.34 // q22.3
11720729_at	-0.188542	-0.0155649	-0.115441	0.139542	0.0155644	0.130942	0.0979919	0.0345665	-1.15018	-0.201866	1.15018	down	CSDC2	27254	0006355 // regulation of transcription, DNA-dependent // inferred from electronic annotation /// 0006397 // mRNA processing // inferred from electronic annotation /// 0006398 // histone mRNA 3'-end processing // non-traceable author statement	0005634 // nucleus // non-traceable author statement /// 0005634 // nucleus // inferred from electronic annotation /// 0005737 // cytoplasm // non-traceable author statement /// 0005737 // cytoplasm // inferred from electronic annotation	0003676 // nucleic acid binding // inferred from electronic annotation /// 0003677 // DNA binding // inferred from electronic annotation /// 0003723 // RNA binding // non-traceable author statement /// 0003723 // RNA binding // inferred from electronic annotation	chr22:41956766-41972670 (+) // 96.31 // q13.2
11729235_s_at	0.060143	0.0602345	0.142057	-0.082902	-0.060143	-0.155635	0.036635	0.00920936	1.13842	0.187038	1.13842	up	E2F6	1876	0000083 // regulation of transcription involved in G1/S phase of mitotic cell cycle // inferred from electronic annotation /// 0000122 // negative regulation of transcription from RNA polymerase II promoter // traceable author statement /// 0006351 // transcription, DNA-dependent // inferred from electronic annotation /// 0006355 // regulation of transcription, DNA-dependent // inferred from elec…	0005634 // nucleus // inferred from electronic annotation /// 0005667 // transcription factor complex // inferred from electronic annotation /// 0071339 // MLL1 complex // inferred from direct assay	0003677 // DNA binding // inferred from electronic annotation /// 0003677 // DNA binding // traceable author statement /// 0003700 // sequence-specific DNA binding transcription factor activity // inferred from electronic annotation /// 0003714 // transcription corepressor activity // traceable author statement	chr2:11584500-11606303 (-) // 83.35 // p25.1
11719930_a_at	0.026885	0.137269	0.00911045	-0.0115833	-0.0408726	-0.00911045	0.26128	0.131389	1.05576	0.0782769	1.05576	up	ARGLU1	55082	0006351 // transcription, DNA-dependent // inferred from electronic annotation /// 0006355 // regulation of transcription, DNA-dependent // inferred from electronic annotation	0005634 // nucleus // inferred from electronic annotation		chr13:107194928-107220512 (-) // 94.79 // q33.3
11733612_s_at	0.0421867	0.0836108	-0.0421865	-0.055495	-0.0985491	0.146512	0.836004	0.736249	1.02128	0.0303811	1.02128	up	DOCK8	81704	0007596 // blood coagulation // traceable author statement	0005829 // cytosol // traceable author statement	0005085 // guanyl-nucleotide exchange factor activity // inferred from electronic annotation /// 0005525 // GTP binding // inferred from electronic annotation /// 0051020 // GTPase binding // inferred from electronic annotation	chr9:214864-465255 (+) // 98.62 // p24.3
11745881_a_at	-0.178881	0.0477052	-0.0190477	0.0190473	0.0345373	-0.0675516	0.715008	0.574294	-1.03198	-0.0454187	1.03198	down	GUCA1A	2978	0007165 // signal transduction // non-traceable author statement /// 0007601 // visual perception // inferred from electronic annotation /// 0007601 // visual perception // traceable author statement /// 0007602 // phototransduction // inferred from electronic annotation /// 0031282 // regulation of guanylate cyclase activity // inferred from electronic annotation /// 0050896 // response to stimu…	0016020 // membrane // inferred from electronic annotation	0005509 // calcium ion binding // inferred from electronic annotation /// 0008048 // calcium sensitive guanylate cyclase activator activity // traceable author statement /// 0008048 // calcium sensitive guanylate cyclase activator activity // inferred from electronic annotation /// 0030249 // guanylate cyclase regulator activity // inferred from electronic annotation	chr6:42123183-42147806 (+) // 92.41 // p21.1
11750096_a_at	0.125544	-0.00585794	0.00585794	-0.0255823	-0.121502	0.217999	0.927762	0.875903	1.0127	0.0182099	1.0127	up	CTNND2	1501	0001763 // morphogenesis of a branching structure // inferred from electronic annotation /// 0006351 // transcription, DNA-dependent // inferred from electronic annotation /// 0006355 // regulation of transcription, DNA-dependent // inferred from electronic annotation /// 0007155 // cell adhesion // traceable author statement /// 0007155 // cell adhesion // inferred from electronic annotation ///…	0005634 // nucleus // inferred from electronic annotation /// 0005737 // cytoplasm // traceable author statement /// 0005912 // adherens junction // inferred from electronic annotation /// 0014069 // postsynaptic density // inferred from electronic annotation /// 0019717 // synaptosome // inferred from electronic annotation /// 0030054 // cell junction // inferred from electronic annotation /// 0…	0005515 // protein binding // inferred from physical interaction	chr5:10972992-11904092 (-) // 99.76 // p15.2
11723609_a_at	-0.0935261	-0.0223575	0.0481689	0.0223575	0.295418	-0.0585554	0.560669	0.395595	-1.07846	-0.108978	1.07846	down	HABP2	3026	0006508 // proteolysis // inferred from electronic annotation /// 0007155 // cell adhesion // traceable author statement	0005576 // extracellular region // non-traceable author statement /// 0005576 // extracellular region // inferred from electronic annotation /// 0005615 // extracellular space // traceable author statement	0003824 // catalytic activity // inferred from electronic annotation /// 0004252 // serine-type endopeptidase activity // inferred from electronic annotation /// 0005539 // glycosaminoglycan binding // traceable author statement /// 0008233 // peptidase activity // inferred from electronic annotation /// 0008236 // serine-type peptidase activity // inferred from electronic annotation /// 0016787 …	chr10:115312736-115349367 (+) // 99.84 // q25.3
11727450_a_at	0.0632858	-0.161175	-0.0075345	0.0227475	0.00753498	-0.0285954	0.756333	0.627192	-1.02506	-0.0357036	1.02506	down	MORN4	118812				chr10:99374311-99393344 (-) // 79.38 // q24.2
11736473_a_at	-0.0214462	-0.0318327	0.103154	-0.0228004	0.0214462	0.0525455	0.996154	0.993223	-1.0003	-0.000438833	1.0003	down	TCF7	6932	0006351 // transcription, DNA-dependent // inferred from electronic annotation /// 0006355 // regulation of transcription, DNA-dependent // not recorded /// 0006355 // regulation of transcription, DNA-dependent // inferred from electronic annotation /// 0006357 // regulation of transcription from RNA polymerase II promoter // not recorded /// 0006357 // regulation of transcription from RNA polyme…	0005634 // nucleus // inferred from direct assay /// 0005634 // nucleus // inferred from electronic annotation /// 0005667 // transcription factor complex // not recorded	0003677 // DNA binding // inferred from electronic annotation /// 0003682 // chromatin binding // not recorded /// 0003700 // sequence-specific DNA binding transcription factor activity // not recorded /// 0003700 // sequence-specific DNA binding transcription factor activity // inferred from electronic annotation /// 0005515 // protein binding // inferred from physical interaction /// 0008013 //…	chr5:133451300-133483919 (+) // 89.87 // q31.1
11739863_a_at	-0.4705	-0.372499	-0.27914	0.31943	0.27914	0.297445	0.00351077	0.000284231	-1.59407	-0.672719	1.59407	down	TTF2	8458	0006351 // transcription, DNA-dependent // inferred from electronic annotation /// 0006353 // transcription termination, DNA-dependent // traceable author statement /// 0006353 // transcription termination, DNA-dependent // inferred from electronic annotation /// 0006355 // regulation of transcription, DNA-dependent // inferred from electronic annotation /// 0006369 // termination of RNA polymera…	0005634 // nucleus // inferred from direct assay /// 0005634 // nucleus // inferred from electronic annotation /// 0005681 // spliceosomal complex // inferred from electronic annotation /// 0005737 // cytoplasm // inferred from direct assay /// 0005737 // cytoplasm // inferred from electronic annotation /// 0008023 // transcription elongation factor complex // traceable author statement	0000166 // nucleotide binding // inferred from electronic annotation /// 0003676 // nucleic acid binding // inferred from electronic annotation /// 0003677 // DNA binding // inferred from electronic annotation /// 0004386 // helicase activity // inferred from electronic annotation /// 0005515 // protein binding // inferred from physical interaction /// 0005524 // ATP binding // inferred from elec…	chr1:117602948-117645489 (+) // 89.78 // p13.1
11735984_at	-0.0383263	0.10437	-0.00589371	-0.124573	0.11181	0.00589371	0.876226	0.796025	1.01561	0.0223394	1.01561	up	OR2B6	26212	0007165 // signal transduction // inferred from electronic annotation /// 0007186 // G-protein coupled receptor signaling pathway // inferred from electronic annotation /// 0007608 // sensory perception of smell // inferred from electronic annotation /// 0050896 // response to stimulus // inferred from electronic annotation /// 0050911 // detection of chemical stimulus involved in sensory percept…	0005886 // plasma membrane // traceable author statement /// 0005886 // plasma membrane // inferred from electronic annotation /// 0016020 // membrane // inferred from electronic annotation /// 0016021 // integral to membrane // inferred from electronic annotation	0004871 // signal transducer activity // inferred from electronic annotation /// 0004872 // receptor activity // inferred from electronic annotation /// 0004930 // G-protein coupled receptor activity // inferred from electronic annotation /// 0004984 // olfactory receptor activity // inferred from electronic annotation	chr6:27925018-27925960 (+) // 99.16 // p22.1
11727105_s_at	-0.0197849	0.00114656	-0.206757	0.194352	-0.00114632	0.194352	0.203102	0.0925114	-1.15214	-0.204318	1.15214	down	FGD5	152273	0007010 // cytoskeleton organization // inferred from sequence or structural similarity /// 0008360 // regulation of cell shape // inferred from sequence or structural similarity /// 0030036 // actin cytoskeleton organization // inferred from sequence or structural similarity /// 0035023 // regulation of Rho protein signal transduction // inferred from electronic annotation /// 0043088 // regulat…	0001726 // ruffle // inferred from sequence or structural similarity /// 0005622 // intracellular // inferred from electronic annotation /// 0005737 // cytoplasm // inferred from sequence or structural similarity /// 0005737 // cytoplasm // inferred from electronic annotation /// 0005794 // Golgi apparatus // inferred from sequence or structural similarity /// 0005856 // cytoskeleton // inferred …	0005085 // guanyl-nucleotide exchange factor activity // inferred from sequence or structural similarity /// 0005085 // guanyl-nucleotide exchange factor activity // inferred from electronic annotation /// 0005089 // Rho guanyl-nucleotide exchange factor activity // inferred from electronic annotation /// 0005543 // phospholipid binding // inferred from electronic annotation /// 0031267 // small …	chr3:14860482-14976072 (+) // 98.53 // p25.1
11756401_x_at	0.0523911	0.0482588	0.067605	-0.0731792	-0.0831366	-0.0482588	0.00479678	0.000478794	1.08996	0.124276	1.08996	up	FAM49B	51571				chr8:130853718-131028697 (-) // 70.01 // q24.21
11735552_at	-0.0302253	0.0761692	-0.0600128	-0.119611	0.0302253	0.0302253	0.897117	0.828037	1.01047	0.0150306	1.01047	up	FCRL6	343413		0009897 // external side of plasma membrane // inferred from direct assay /// 0009897 // external side of plasma membrane // inferred from electronic annotation /// 0016020 // membrane // inferred from electronic annotation /// 0016021 // integral to membrane // inferred from electronic annotation	0004872 // receptor activity // inferred from electronic annotation /// 0019903 // protein phosphatase binding // inferred from electronic annotation	chr1:159770301-159786047 (+) // 84.62 // q23.2
11757770_s_at	-0.0176449	0.0198307	0.0430212	-0.0098896	-0.0350418	0.0098896	0.455611	0.289758	1.01871	0.0267497	1.01871	up	TOMM70A	9868	0006626 // protein targeting to mitochondrion // traceable author statement /// 0044267 // cellular protein metabolic process // traceable author statement	0005739 // mitochondrion // inferred from direct assay /// 0005739 // mitochondrion // inferred from electronic annotation /// 0005741 // mitochondrial outer membrane // inferred from electronic annotation /// 0005742 // mitochondrial outer membrane translocase complex // traceable author statement /// 0016020 // membrane // inferred from electronic annotation /// 0016021 // integral to membrane …	0004872 // receptor activity // inferred from electronic annotation /// 0005515 // protein binding // inferred from physical interaction /// 0008320 // protein transmembrane transporter activity // traceable author statement	chr3:100082307-100082909 (-) // 90.92 // q12.2
11728073_a_at	0.210014	0.162736	0.213562	-0.207611	-0.221454	-0.162736	0.00175153	8.34749e-05	1.31285	0.392704	1.31285	up	ITPRIP	85450		0005886 // plasma membrane // inferred from electronic annotation /// 0016020 // membrane // inferred from electronic annotation		chr10:106071900-106093713 (-) // 98.8 // q25.1
11743191_a_at	0.926358	0.70766	0.774833	-0.813208	-0.779239	-0.70766	0.000959856	2.58643e-05	2.96833	1.56965	2.96833	up	LOC100653217 /// NTM	100653217 /// 50863	0007155 // cell adhesion // inferred from electronic annotation /// 0007155 // cell adhesion // non-traceable author statement /// 0008038 // neuron recognition // traceable author statement	0005886 // plasma membrane // inferred from electronic annotation /// 0016020 // membrane // inferred from electronic annotation /// 0031225 // anchored to membrane // inferred from electronic annotation	0005515 // protein binding // inferred from physical interaction	chr11:131780518-132206715 (+) // 96.55 // q25
11721561_a_at	0.028264	0.0896988	0.0391846	-0.0295229	-0.107794	-0.0282636	0.0868672	0.0293778	1.07742	0.107576	1.07742	up	AHCYL2	23382	0006730 // one-carbon metabolic process // inferred from electronic annotation		0000166 // nucleotide binding // inferred from electronic annotation /// 0004013 // adenosylhomocysteinase activity // inferred from electronic annotation /// 0016787 // hydrolase activity // inferred from electronic annotation	chr7:128864870-129070051 (+) // 93.63 // q32.1
11740776_a_at	0.149835	-0.096271	0.154587	-0.154162	-0.0329528	0.0329528	0.456709	0.290853	1.08732	0.120771	1.08732	up	CCDC36	339834				chr3:49235860-49295537 (+) // 94.67 // p21.31
11750796_a_at	0.164145	0.779187	0.875394	-0.164145	-0.548561	-0.55691	0.0555369	0.016204	2.04124	1.02945	2.04124	up	DNER	92737	0001764 // neuron migration // non-traceable author statement /// 0006897 // endocytosis // non-traceable author statement /// 0007219 // Notch signaling pathway // traceable author statement /// 0007219 // Notch signaling pathway // inferred from electronic annotation /// 0007220 // Notch receptor processing // inferred from electronic annotation /// 0007416 // synapse assembly // non-traceable …	0005769 // early endosome // inferred from direct assay /// 0005886 // plasma membrane // inferred from direct assay /// 0005886 // plasma membrane // inferred from electronic annotation /// 0016020 // membrane // inferred from electronic annotation /// 0016021 // integral to membrane // inferred from electronic annotation /// 0030425 // dendrite // inferred from direct assay /// 0030425 // dendr…	0004872 // receptor activity // inferred from electronic annotation /// 0004888 // transmembrane signaling receptor activity // traceable author statement /// 0005112 // Notch binding // inferred from electronic annotation /// 0005509 // calcium ion binding // non-traceable author statement /// 0005509 // calcium ion binding // inferred from electronic annotation /// 0005515 // protein binding //…	chr2:230222831-230451615 (-) // 97.71 // q36.3
11756636_x_at	-0.0363297	-0.00203323	-0.0629973	0.111255	0.00203371	0.148735	0.152678	0.0629785	-1.08758	-0.121128	1.08758	down	PCED1A	64773			0016787 // hydrolase activity // inferred from electronic annotation	chr20:2816005-2821314 (-) // 93.58 // p13
11730313_a_at	0.179337	-0.102732	-0.0160222	-0.156603	0.023056	0.0160222	0.72961	0.591857	1.04201	0.0593691	1.04201	up	ERMAP	114625		0005737 // cytoplasm // inferred from electronic annotation /// 0005886 // plasma membrane // inferred from direct assay /// 0005886 // plasma membrane // inferred from electronic annotation /// 0016020 // membrane // inferred from electronic annotation /// 0016021 // integral to membrane // inferred from electronic annotation /// 0031410 // cytoplasmic vesicle // inferred from electronic annotat…		chr1:43282758-43310655 (+) // 82.7 // p34.2
11734540_at	-0.0123355	0.0123355	-0.162754	0.0824492	0.274241	-0.0570774	0.394629	0.235667	-1.11274	-0.154122	1.11274	down	LOC728819	728819				chr2:43902291-43903461 (-) // 83.18 // p21
11715925_a_at	0.207438	0.271433	0.22666	-0.209911	-0.223338	-0.207437	0.000886751	2.15247e-05	1.36485	0.448739	1.36485	up	TRAM1	23471	0006412 // translation // traceable author statement /// 0006613 // cotranslational protein targeting to membrane // traceable author statement /// 0006614 // SRP-dependent cotranslational protein targeting to membrane // traceable author statement /// 0006810 // transport // inferred from electronic annotation /// 0010467 // gene expression // traceable author statement /// 0015031 // protein tr…	0005783 // endoplasmic reticulum // traceable author statement /// 0005783 // endoplasmic reticulum // inferred from electronic annotation /// 0005789 // endoplasmic reticulum membrane // inferred from electronic annotation /// 0016020 // membrane // inferred from electronic annotation /// 0016021 // integral to membrane // inferred from electronic annotation /// 0016021 // integral to membrane /…	0004872 // receptor activity // traceable author statement /// 0005515 // protein binding // inferred from physical interaction	chr8:71485454-71520714 (-) // 92.64 // q13.3
11745325_a_at	-0.00289202	-0.0658698	0.00289202	0.153287	0.0124383	-0.0776949	0.660439	0.508416	-1.0362	-0.0513001	1.0362	down	ZNF497	162968	0006351 // transcription, DNA-dependent // inferred from electronic annotation /// 0006355 // regulation of transcription, DNA-dependent // inferred from electronic annotation	0005622 // intracellular // inferred from electronic annotation /// 0005634 // nucleus // inferred from electronic annotation	0003676 // nucleic acid binding // inferred from electronic annotation /// 0003677 // DNA binding // inferred from electronic annotation /// 0008270 // zinc ion binding // inferred from electronic annotation /// 0046872 // metal ion binding // inferred from electronic annotation	chr19:58866926-58874214 (-) // 99.96 // q13.43
11752744_a_at	-0.0344057	-0.0577364	-0.123869	0.0467043	0.0344057	0.0408211	0.0500101	0.0140549	-1.08121	-0.112647	1.08121	down	LGMN	5641	0001101 // response to acid // inferred from electronic annotation /// 0006508 // proteolysis // inferred from electronic annotation /// 0006508 // proteolysis // inferred from sequence or structural similarity /// 0008202 // steroid metabolic process // traceable author statement /// 0040015 // negative regulation of multicellular organism growth // inferred from electronic annotation /// 004235…	0005764 // lysosome // inferred from electronic annotation /// 0005770 // late endosome // inferred from electronic annotation /// 0043202 // lysosomal lumen // traceable author statement /// 0045177 // apical part of cell // inferred from electronic annotation	0004197 // cysteine-type endopeptidase activity // inferred from electronic annotation /// 0004197 // cysteine-type endopeptidase activity // inferred from sequence or structural similarity /// 0008233 // peptidase activity // inferred from direct assay /// 0008233 // peptidase activity // inferred from electronic annotation /// 0008234 // cysteine-type peptidase activity // inferred from electro…	chr14:93170472-93214972 (-) // 95.86 // q32.12
11736147_s_at	-0.0384789	-0.0213242	-0.0987854	0.0983925	0.0462837	0.0213242	0.0873259	0.0295984	-1.07788	-0.108196	1.07788	down	LYRM2 /// ZC3H11A	57226 /// 9877		0005739 // mitochondrion // inferred from electronic annotation	0003676 // nucleic acid binding // inferred from electronic annotation /// 0005515 // protein binding // inferred from physical interaction /// 0008270 // zinc ion binding // inferred from electronic annotation /// 0046872 // metal ion binding // inferred from electronic annotation	chr6:90341944-90348475 (-) // 64.9 // q15
11727772_a_at	0.102957	-0.0317931	-0.122601	0.0317931	0.0566363	-0.0442166	0.796447	0.681627	-1.02235	-0.0318832	1.02235	down	PITPNM2	57605	0006810 // transport // inferred from electronic annotation /// 0008152 // metabolic process // non-traceable author statement	0005622 // intracellular // inferred from electronic annotation /// 0005625 // soluble fraction // inferred from electronic annotation /// 0012505 // endomembrane system // inferred from electronic annotation /// 0016020 // membrane // inferred from electronic annotation /// 0016021 // integral to membrane // non-traceable author statement /// 0043231 // intracellular membrane-bounded organelle /…	0005509 // calcium ion binding // non-traceable author statement /// 0008289 // lipid binding // inferred from electronic annotation /// 0046872 // metal ion binding // inferred from electronic annotation	chr12:123468026-123634562 (-) // 98.54 // q24.31
11747878_a_at	-0.0536699	-0.16399	-0.12939	0.0536699	0.102416	0.0727158	0.0257558	0.00568249	-1.14231	-0.19195	1.14231	down	STX3	6809	0006810 // transport // inferred from electronic annotation /// 0006836 // neurotransmitter transport // inferred from electronic annotation /// 0006886 // intracellular protein transport // inferred from electronic annotation /// 0006887 // exocytosis // inferred from electronic annotation /// 0006944 // cellular membrane fusion // inferred from electronic annotation /// 0016192 // vesicle-media…	0005622 // intracellular // inferred from electronic annotation /// 0005773 // vacuole // traceable author statement /// 0005911 // cell-cell junction // inferred from direct assay /// 0016020 // membrane // inferred from electronic annotation /// 0016021 // integral to membrane // inferred from electronic annotation /// 0016324 // apical plasma membrane // inferred from direct assay /// 0016324 …	0005484 // SNAP receptor activity // inferred from electronic annotation /// 0005515 // protein binding // inferred from physical interaction /// 0050544 // arachidonic acid binding // inferred from sequence or structural similarity /// 0050544 // arachidonic acid binding // inferred from electronic annotation	chr11:59522924-59568958 (+) // 96.76 // q12.1
11715826_x_at	0.00872517	-0.0983896	0.00208664	-0.0825653	-0.00208664	0.042326	0.865755	0.779483	-1.01051	-0.0150839	1.01051	down	HMG20B	10362	0006325 // chromatin organization // non-traceable author statement /// 0006351 // transcription, DNA-dependent // inferred from electronic annotation /// 0006355 // regulation of transcription, DNA-dependent // non-traceable author statement /// 0006355 // regulation of transcription, DNA-dependent // inferred from electronic annotation /// 0007049 // cell cycle // inferred from electronic annot…	0005634 // nucleus // non-traceable author statement /// 0005634 // nucleus // inferred from electronic annotation /// 0005654 // nucleoplasm // traceable author statement /// 0005694 // chromosome // inferred from electronic annotation	0003677 // DNA binding // non-traceable author statement /// 0003677 // DNA binding // inferred from electronic annotation /// 0003700 // sequence-specific DNA binding transcription factor activity // non-traceable author statement /// 0005515 // protein binding // inferred from physical interaction	chr19:3572942-3579233 (+) // 92.13 // p13.3
11751973_x_at	-0.285882	-0.151065	-0.227658	0.19901	0.151065	0.263783	0.00825253	0.001113	-1.34365	-0.426154	1.34365	down	PROSAPIP1	9762	0051260 // protein homooligomerization // inferred from electronic annotation	0005737 // cytoplasm // inferred from electronic annotation /// 0005856 // cytoskeleton // inferred from electronic annotation /// 0005886 // plasma membrane // inferred from electronic annotation /// 0014069 // postsynaptic density // inferred from sequence or structural similarity /// 0014069 // postsynaptic density // inferred from electronic annotation /// 0016020 // membrane // inferred from…	0030165 // PDZ domain binding // inferred from electronic annotation /// 0043621 // protein self-association // inferred from electronic annotation	chr20:3143274-3154194 (-) // 95.54 // p13
11720944_at	0.017144	0.164669	-0.017144	-0.062449	-0.0320396	0.0828705	0.615078	0.455552	1.04157	0.0587622	1.04157	up	RGS16	6004	0007601 // visual perception // traceable author statement /// 0008277 // regulation of G-protein coupled receptor protein signaling pathway // traceable author statement /// 0009968 // negative regulation of signal transduction // inferred from electronic annotation /// 0038032 // termination of G-protein coupled receptor signaling pathway // inferred from electronic annotation /// 0043547 // po…	0005624 // membrane fraction // inferred from electronic annotation /// 0005737 // cytoplasm // not recorded /// 0005886 // plasma membrane // not recorded /// 0045121 // membrane raft // inferred from electronic annotation	0005096 // GTPase activator activity // not recorded /// 0005096 // GTPase activator activity // traceable author statement /// 0005515 // protein binding // inferred from physical interaction /// 0005516 // calmodulin binding // traceable author statement	chr1:182567757-182573548 (-) // 88.47 // q25.3
11719697_a_at	-0.359674	-0.308357	-0.294037	0.368577	0.364882	0.294037	0.00102791	2.96689e-05	-1.58358	-0.663188	1.58358	down	HSPB11	51668	0006950 // response to stress // inferred from electronic annotation /// 0007155 // cell adhesion // inferred from electronic annotation	0005929 // cilium // inferred from electronic annotation /// 0030992 // intraflagellar transport particle B // inferred from electronic annotation		chr1:54387233-54411602 (-) // 73.84 // p32.3
11750814_a_at	0.104416	-0.0461619	-0.135151	0.0751781	0.0461621	-0.111779	0.857027	0.767064	-1.02018	-0.0288193	1.02018	down	BEND2	139105				chrX:18189058-18238956 (-) // 92.07 // p22.13
11760040_x_at	-0.0498786	-0.0738659	-0.0813274	0.0890079	0.0498791	0.128767	0.0167035	0.0030837	-1.11541	-0.157575	1.11541	down	NDUFB4	4710	0006120 // mitochondrial electron transport, NADH to ubiquinone // non-traceable author statement /// 0006810 // transport // inferred from electronic annotation /// 0006979 // response to oxidative stress // inferred from direct assay /// 0022900 // electron transport chain // inferred from electronic annotation /// 0022904 // respiratory electron transport chain // traceable author statement //…	0005739 // mitochondrion // inferred from electronic annotation /// 0005743 // mitochondrial inner membrane // traceable author statement /// 0005743 // mitochondrial inner membrane // inferred from electronic annotation /// 0005747 // mitochondrial respiratory chain complex I // inferred from direct assay /// 0005747 // mitochondrial respiratory chain complex I // non-traceable author statement …	0008137 // NADH dehydrogenase (ubiquinone) activity // non-traceable author statement /// 0008137 // NADH dehydrogenase (ubiquinone) activity // inferred from electronic annotation	chr3:120315156-120320471 (+) // 99.33 // q13.33
11740214_a_at	-0.369756	-0.54881	-0.379545	0.369756	0.65351	0.551719	0.00610244	0.000698782	-1.94221	-0.957699	1.94221	down	TBL1X	6907	0000122 // negative regulation of transcription from RNA polymerase II promoter // inferred from direct assay /// 0006351 // transcription, DNA-dependent // inferred from electronic annotation /// 0006355 // regulation of transcription, DNA-dependent // inferred from electronic annotation /// 0006357 // regulation of transcription from RNA polymerase II promoter // inferred from electronic annota…	0000118 // histone deacetylase complex // inferred from direct assay /// 0005634 // nucleus // inferred from direct assay /// 0005634 // nucleus // inferred from electronic annotation /// 0005654 // nucleoplasm // traceable author statement /// 0005667 // transcription factor complex // inferred from electronic annotation /// 0005876 // spindle microtubule // inferred from direct assay /// 001705…	0003677 // DNA binding // inferred from electronic annotation /// 0003682 // chromatin binding // inferred from electronic annotation /// 0003714 // transcription corepressor activity // inferred from direct assay /// 0003714 // transcription corepressor activity // inferred from genetic interaction /// 0003714 // transcription corepressor activity // inferred from electronic annotation /// 00055…	chrX:9431105-9687780 (+) // 97.47 // p22.31
11723347_a_at	-0.247741	-0.105992	-0.158072	0.135556	0.138656	0.105992	0.0133903	0.00223267	-1.22887	-0.297336	1.22887	down	MTERFD1	51001	0006351 // transcription, DNA-dependent // inferred from electronic annotation /// 0006355 // regulation of transcription, DNA-dependent // inferred from electronic annotation /// 0045892 // negative regulation of transcription, DNA-dependent // inferred from mutant phenotype /// 0045892 // negative regulation of transcription, DNA-dependent // inferred from electronic annotation	0005739 // mitochondrion // inferred from direct assay /// 0005739 // mitochondrion // inferred from electronic annotation	0003677 // DNA binding // inferred from electronic annotation /// 0044212 // transcription regulatory region DNA binding // inferred from direct assay	chr8:97251648-97273828 (-) // 88.33 // q22.1
11738156_a_at	-0.214839	0.228511	-0.404273	-0.0276241	0.0694771	0.0276241	0.622342	0.463969	-1.11216	-0.15336	1.11216	down	ZBTB26	57684	0006351 // transcription, DNA-dependent // inferred from electronic annotation /// 0006355 // regulation of transcription, DNA-dependent // inferred from electronic annotation	0005622 // intracellular // inferred from electronic annotation /// 0005634 // nucleus // inferred from electronic annotation	0003676 // nucleic acid binding // inferred from electronic annotation /// 0003677 // DNA binding // inferred from electronic annotation /// 0008270 // zinc ion binding // inferred from electronic annotation /// 0046872 // metal ion binding // inferred from electronic annotation	chr9:125680378-125693544 (-) // 95.61 // q33.2
11716129_at	0.177548	0.175116	0.161077	-0.161077	-0.213936	-0.25162	0.00237725	0.000142553	1.30145	0.380124	1.30145	up	IGF2R	3482	0006810 // transport // inferred from electronic annotation /// 0006898 // receptor-mediated endocytosis // traceable author statement /// 0007165 // signal transduction // traceable author statement /// 0048009 // insulin-like growth factor receptor signaling pathway // traceable author statement	0005624 // membrane fraction // inferred from electronic annotation /// 0005634 // nucleus // inferred from electronic annotation /// 0005641 // nuclear envelope lumen // inferred from electronic annotation /// 0005737 // cytoplasm // inferred from electronic annotation /// 0005764 // lysosome // inferred from electronic annotation /// 0005765 // lysosomal membrane // inferred from electronic ann…	0001948 // glycoprotein binding // inferred from direct assay /// 0001948 // glycoprotein binding // inferred from electronic annotation /// 0004872 // receptor activity // traceable author statement /// 0004872 // receptor activity // inferred from electronic annotation /// 0005010 // insulin-like growth factor-activated receptor activity // traceable author statement /// 0005215 // transporter …	chr6:160390130-160527581 (+) // 98.1 // q25.3
11756882_a_at	0.100858	-0.00702715	0.0967889	-0.290427	-0.136254	0.00702763	0.205003	0.093622	1.15143	0.203424	1.15143	up	RTTN	25914	0007275 // multicellular organismal development // inferred from electronic annotation /// 0007368 // determination of left/right symmetry // inferred from electronic annotation			chr18:67671044-67863889 (-) // 97.69 // q22.2
11755637_x_at	0.0915666	0.0138497	0.103359	-0.0179892	-0.0138502	-0.0315118	0.0962045	0.0337334	1.06489	0.090709	1.06489	up	ARHGEF10L	55160	0032321 // positive regulation of Rho GTPase activity // inferred from direct assay /// 0035023 // regulation of Rho protein signal transduction // inferred from electronic annotation /// 0035104 // positive regulation of transcription via sterol regulatory element binding // inferred from direct assay /// 0051496 // positive regulation of stress fiber assembly // inferred from direct assay	0005622 // intracellular // inferred from electronic annotation /// 0005737 // cytoplasm // inferred from electronic annotation /// 0005829 // cytosol // inferred from direct assay	0005085 // guanyl-nucleotide exchange factor activity // inferred from electronic annotation /// 0005089 // Rho guanyl-nucleotide exchange factor activity // inferred from electronic annotation /// 0005100 // Rho GTPase activator activity // inferred from direct assay	chr1:17941582-18024363 (+) // 89.68 // p36.13
11718996_at	-0.36436	-0.0198879	0.0396333	0.202807	0.0198879	-0.0198879	0.435773	0.272086	-1.13483	-0.182474	1.13483	down	MSRB2	22921	0006355 // regulation of transcription, DNA-dependent // traceable author statement /// 0030091 // protein repair // inferred from sequence or structural similarity /// 0030091 // protein repair // inferred from electronic annotation /// 0055114 // oxidation-reduction process // inferred from electronic annotation	0005739 // mitochondrion // inferred from sequence or structural similarity /// 0005739 // mitochondrion // inferred from electronic annotation	0000318 // protein-methionine-R-oxide reductase activity // inferred from sequence or structural similarity /// 0000318 // protein-methionine-R-oxide reductase activity // inferred from electronic annotation /// 0003700 // sequence-specific DNA binding transcription factor activity // traceable author statement /// 0008113 // peptide-methionine-(S)-S-oxide reductase activity // inferred from elec…	chr10:23384377-23411276 (+) // 57.95 // p12.2
11742377_at	-0.0891948	-0.0634348	0.0128021	0.138189	-0.0128024	0.041714	0.258688	0.129598	-1.07349	-0.102309	1.07349	down	OR7C2	26658	0007165 // signal transduction // inferred from electronic annotation /// 0007186 // G-protein coupled receptor signaling pathway // inferred from electronic annotation /// 0007608 // sensory perception of smell // inferred from electronic annotation /// 0050896 // response to stimulus // inferred from electronic annotation /// 0050911 // detection of chemical stimulus involved in sensory percept…	0005886 // plasma membrane // traceable author statement /// 0005886 // plasma membrane // inferred from electronic annotation /// 0016020 // membrane // inferred from electronic annotation /// 0016021 // integral to membrane // inferred from electronic annotation	0004871 // signal transducer activity // inferred from electronic annotation /// 0004872 // receptor activity // inferred from electronic annotation /// 0004930 // G-protein coupled receptor activity // inferred from electronic annotation /// 0004984 // olfactory receptor activity // inferred from electronic annotation	chr19:15052300-15053260 (+) // 99.69 // p13.12
11736548_s_at	-0.0622621	-0.154945	-0.0859013	0.235363	0.0622621	0.197614	0.0418881	0.0110235	-1.20257	-0.266116	1.20257	down	FANCD2	2177	0006281 // DNA repair // traceable author statement /// 0006281 // DNA repair // inferred from electronic annotation /// 0006974 // response to DNA damage stimulus // inferred from electronic annotation /// 0007049 // cell cycle // inferred from electronic annotation /// 0007129 // synapsis // inferred from electronic annotation /// 0007276 // gamete generation // inferred from electronic annotat…	0000793 // condensed chromosome // inferred from electronic annotation /// 0005634 // nucleus // inferred from electronic annotation /// 0005654 // nucleoplasm // traceable author statement	0005515 // protein binding // inferred from physical interaction	chr3:10068070-10141344 (+) // 93.96 // p25.3
11747866_a_at	-0.209145	-0.162994	-0.173995	0.162994	0.333825	0.261024	0.008063	0.00107248	-1.35159	-0.434659	1.35159	down	RBL2	5934	0000080 // G1 phase of mitotic cell cycle // traceable author statement /// 0000278 // mitotic cell cycle // traceable author statement /// 0006351 // transcription, DNA-dependent // inferred from electronic annotation /// 0006355 // regulation of transcription, DNA-dependent // inferred from electronic annotation /// 0007049 // cell cycle // inferred from electronic annotation /// 0016568 // chr…	0000785 // chromatin // inferred from electronic annotation /// 0005634 // nucleus // inferred from direct assay /// 0005634 // nucleus // inferred from electronic annotation /// 0005654 // nucleoplasm // traceable author statement /// 0005667 // transcription factor complex // inferred from electronic annotation /// 0005730 // nucleolus // inferred from direct assay /// 0005737 // cytoplasm // i…	0003677 // DNA binding // inferred from electronic annotation /// 0005515 // protein binding // inferred from physical interaction	chr16:53483880-53524532 (+) // 99.86 // q12.2
11719799_a_at	-0.0351963	-0.0581732	-0.00377464	0.102776	0.0918093	0.00377464	0.125642	0.0484049	-1.07066	-0.0985012	1.07066	down	MBD4	8930	0006281 // DNA repair // traceable author statement /// 0006281 // DNA repair // inferred from electronic annotation /// 0006284 // base-excision repair // inferred from electronic annotation /// 0006284 // base-excision repair // traceable author statement /// 0006285 // base-excision repair, AP site formation // traceable author statement /// 0006974 // response to DNA damage stimulus // inferr…	0000785 // chromatin // inferred from electronic annotation /// 0005634 // nucleus // inferred from direct assay /// 0005634 // nucleus // inferred from electronic annotation /// 0005634 // nucleus // traceable author statement /// 0005654 // nucleoplasm // traceable author statement /// 0005730 // nucleolus // inferred from direct assay /// 0005737 // cytoplasm // inferred from electronic annota…	0003677 // DNA binding // inferred from electronic annotation /// 0003696 // satellite DNA binding // traceable author statement /// 0003824 // catalytic activity // inferred from electronic annotation /// 0004520 // endodeoxyribonuclease activity // traceable author statement /// 0005515 // protein binding // inferred from physical interaction /// 0016787 // hydrolase activity // inferred from e…	chr3:129149788-129159022 (-) // 86.25 // q21.3
11742511_a_at	0.0545955	-0.0271134	0.0271134	-0.0511088	0.116174	-0.219357	0.673128	0.523762	1.04945	0.0696289	1.04945	up	IL4R	3566	0002532 // production of molecular mediator involved in inflammatory response // inferred from electronic annotation /// 0006955 // immune response // traceable author statement /// 0007165 // signal transduction // traceable author statement /// 0019221 // cytokine-mediated signaling pathway // inferred from electronic annotation /// 0030728 // ovulation // inferred from electronic annotation //…	0005576 // extracellular region // inferred from electronic annotation /// 0005615 // extracellular space // inferred from electronic annotation /// 0005886 // plasma membrane // inferred from electronic annotation /// 0005887 // integral to plasma membrane // traceable author statement /// 0016020 // membrane // inferred from electronic annotation /// 0016021 // integral to membrane // inferred …	0004872 // receptor activity // inferred from electronic annotation /// 0004896 // cytokine receptor activity // inferred from electronic annotation /// 0004913 // interleukin-4 receptor activity // traceable author statement /// 0005057 // receptor signaling protein activity // traceable author statement /// 0005515 // protein binding // inferred from physical interaction /// 0043560 // insulin …	chr16:27325250-27364017 (+) // 70.52 // p12.1
11741910_s_at	-0.100573	-0.124205	0.0441725	0.0844007	0.123277	-0.0441725	0.340904	0.191251	-1.08275	-0.114703	1.08275	down	PKNOX2	63876	0006355 // regulation of transcription, DNA-dependent // inferred from electronic annotation /// 0006357 // regulation of transcription from RNA polymerase II promoter // inferred from electronic annotation	0005634 // nucleus // inferred from electronic annotation /// 0005737 // cytoplasm // inferred from electronic annotation /// 0015629 // actin cytoskeleton // inferred from electronic annotation /// 0015630 // microtubule cytoskeleton // inferred from electronic annotation	0003677 // DNA binding // inferred from direct assay /// 0003677 // DNA binding // inferred from electronic annotation /// 0003700 // sequence-specific DNA binding transcription factor activity // inferred from electronic annotation /// 0003785 // actin monomer binding // inferred from electronic annotation /// 0043565 // sequence-specific DNA binding // inferred from electronic annotation /// 00…	chr11:125034558-125303282 (+) // 97.22 // q24.2
11759627_at	-0.29915	-0.291625	-0.644476	0.293207	0.291625	0.4443	0.0201042	0.00401067	-1.68739	-0.754794	1.68739	down	USP15	9958	0006508 // proteolysis // inferred from electronic annotation /// 0006511 // ubiquitin-dependent protein catabolic process // inferred from electronic annotation /// 0016579 // protein deubiquitination // inferred from direct assay		0003824 // catalytic activity // inferred from electronic annotation /// 0004197 // cysteine-type endopeptidase activity // traceable author statement /// 0004221 // ubiquitin thiolesterase activity // inferred from electronic annotation /// 0004843 // ubiquitin-specific protease activity // inferred from direct assay /// 0004843 // ubiquitin-specific protease activity // inferred from electronic…	chr12:62654160-62730474 (+) // 82.6 // q14.1
11718129_x_at	0.12746	0.0376215	0.038662	-0.0664635	-0.0416088	-0.0376215	0.0651821	0.0200528	1.08409	0.116479	1.08409	up	ARL2	402	0006184 // GTP catabolic process // inferred from mutant phenotype /// 0007021 // tubulin complex assembly // traceable author statement /// 0007049 // cell cycle // inferred from electronic annotation /// 0007264 // small GTPase mediated signal transduction // inferred from electronic annotation /// 0010811 // positive regulation of cell-substrate adhesion // inferred from sequence or structural…	0005622 // intracellular // inferred from electronic annotation /// 0005634 // nucleus // inferred from direct assay /// 0005634 // nucleus // inferred from electronic annotation /// 0005737 // cytoplasm // inferred from electronic annotation /// 0005739 // mitochondrion // inferred from electronic annotation /// 0005758 // mitochondrial intermembrane space // inferred from direct assay /// 00057…	0000166 // nucleotide binding // inferred from electronic annotation /// 0003924 // GTPase activity // inferred from mutant phenotype /// 0005095 // GTPase inhibitor activity // traceable author statement /// 0005515 // protein binding // inferred from physical interaction /// 0005525 // GTP binding // inferred from mutant phenotype /// 0005525 // GTP binding // inferred from electronic annotatio…	chr11:64781423-64789656 (+) // 95.24 // q13.1
11734958_s_at	-0.025919	0.369833	0.118958	0.025919	-0.141208	-0.0891199	0.289348	0.151536	1.16669	0.222427	1.16669	up	C14orf135	64430		0016020 // membrane // inferred from electronic annotation /// 0016021 // integral to membrane // inferred from electronic annotation		chr14:60558544-60601530 (+) // 99.38 // q23.1
11759275_at	0.183728	0.0592821	-0.124687	-0.268524	0.00330043	-0.00330043	0.532188	0.36618	1.0935	0.128949	1.0935	up	OR2M3	127062	0007165 // signal transduction // inferred from electronic annotation /// 0007186 // G-protein coupled receptor signaling pathway // inferred from electronic annotation /// 0007608 // sensory perception of smell // inferred from electronic annotation /// 0050896 // response to stimulus // inferred from electronic annotation /// 0050911 // detection of chemical stimulus involved in sensory percept…	0005886 // plasma membrane // traceable author statement /// 0005886 // plasma membrane // inferred from electronic annotation /// 0016020 // membrane // inferred from electronic annotation /// 0016021 // integral to membrane // inferred from electronic annotation	0004871 // signal transducer activity // inferred from electronic annotation /// 0004872 // receptor activity // inferred from electronic annotation /// 0004930 // G-protein coupled receptor activity // inferred from electronic annotation /// 0004984 // olfactory receptor activity // inferred from electronic annotation	chr1:248366331-248367393 (+) // 100.0 // q44
11745871_a_at	-0.00292015	0.0761213	0.0410309	0.00292015	-0.0697222	-0.0680695	0.158687	0.0661958	1.05924	0.0830345	1.05924	up	PAPOLA	10914	0000398 // nuclear mRNA splicing, via spliceosome // traceable author statement /// 0006351 // transcription, DNA-dependent // inferred from electronic annotation /// 0006366 // transcription from RNA polymerase II promoter // traceable author statement /// 0006369 // termination of RNA polymerase II transcription // traceable author statement /// 0006378 // mRNA polyadenylation // non-traceable …	0005634 // nucleus // inferred from direct assay /// 0005634 // nucleus // traceable author statement /// 0005634 // nucleus // inferred from electronic annotation /// 0005654 // nucleoplasm // traceable author statement /// 0005730 // nucleolus // inferred from direct assay /// 0005737 // cytoplasm // traceable author statement /// 0005737 // cytoplasm // inferred from electronic annotation	0000166 // nucleotide binding // inferred from electronic annotation /// 0000287 // magnesium ion binding // inferred from sequence or structural similarity /// 0003723 // RNA binding // non-traceable author statement /// 0003723 // RNA binding // inferred from electronic annotation /// 0004652 // polynucleotide adenylyltransferase activity // inferred from sequence or structural similarity /// 0…	chr14:96968770-97033420 (+) // 97.22 // q32.2
11734814_a_at	0.0312989	-0.0365264	0.0331128	-0.0312989	-0.0870233	0.122232	0.94821	0.910316	1.00555	0.0079917	1.00555	up	PDE1A	5136	0000042 // protein targeting to Golgi // inferred from electronic annotation /// 0007165 // signal transduction // traceable author statement /// 0007165 // signal transduction // inferred from electronic annotation /// 0007173 // epidermal growth factor receptor signaling pathway // traceable author statement /// 0007202 // activation of phospholipase C activity // traceable author statement ///…	0005829 // cytosol // traceable author statement	0003824 // catalytic activity // inferred from electronic annotation /// 0004114 // 3',5'-cyclic-nucleotide phosphodiesterase activity // inferred from electronic annotation /// 0004117 // calmodulin-dependent cyclic-nucleotide phosphodiesterase activity // traceable author statement /// 0005516 // calmodulin binding // inferred from electronic annotation /// 0008081 // phosphoric diester hydrola…	chr2:183006903-183387425 (-) // 97.1 // q32.1
11722465_a_at	-0.00762176	0.00762129	-0.0227408	-0.107437	0.0605397	0.115252	0.792618	0.676424	-1.02127	-0.0303654	1.02127	down	C17orf80	55028		0016020 // membrane // inferred from electronic annotation /// 0016021 // integral to membrane // inferred from electronic annotation		chr17:71228867-71245093 (+) // 98.03 // q25.1
11719993_x_at	0.074595	0.168561	0.0602417	-0.139514	-0.117898	-0.0602412	0.0314747	0.00748523	1.1543	0.207017	1.1543	up	NLK	51701	0000165 // MAPK cascade // inferred from sequence or structural similarity /// 0000165 // MAPK cascade // inferred from electronic annotation /// 0006351 // transcription, DNA-dependent // inferred from electronic annotation /// 0006355 // regulation of transcription, DNA-dependent // inferred from sequence or structural similarity /// 0006355 // regulation of transcription, DNA-dependent // infe…	0005634 // nucleus // inferred from sequence or structural similarity /// 0005634 // nucleus // inferred from electronic annotation /// 0005634 // nucleus // traceable author statement /// 0005737 // cytoplasm // inferred from electronic annotation	0000166 // nucleotide binding // inferred from electronic annotation /// 0000287 // magnesium ion binding // inferred from sequence or structural similarity /// 0000287 // magnesium ion binding // inferred from electronic annotation /// 0004672 // protein kinase activity // traceable author statement /// 0004672 // protein kinase activity // inferred from electronic annotation /// 0004674 // prot…	chr17:26368784-26523402 (+) // 91.63 // q11.2
11733607_a_at	-0.198926	-0.54433	-0.641834	0.198926	0.331484	0.381168	0.0273701	0.00616498	-1.70003	-0.765556	1.70003	down	LRRC34	151827				chr3:169511268-169530312 (-) // 97.6 // q26.2
11721035_x_at	0.228723	0.044507	0.0573301	-0.044507	-0.0815992	-0.0833259	0.111955	0.041371	1.13288	0.179997	1.13288	up	PPP1R3B	79660	0005975 // carbohydrate metabolic process // inferred from electronic annotation /// 0005977 // glycogen metabolic process // inferred from electronic annotation			chr8:8993764-9008220 (-) // 88.24 // p23.1
11742980_a_at	0.224966	0.179701	0.0596101	-0.0818486	-0.0596104	-0.133464	0.0397955	0.0102947	1.18624	0.2464	1.18624	up	ANKS1B	56899		0005634 // nucleus // inferred from electronic annotation /// 0005737 // cytoplasm // inferred from electronic annotation /// 0005886 // plasma membrane // inferred from electronic annotation /// 0014069 // postsynaptic density // inferred from electronic annotation /// 0015030 // Cajal body // inferred from electronic annotation /// 0016020 // membrane // inferred from electronic annotation /// …	0046875 // ephrin receptor binding // inferred from physical interaction	chr12:99137995-99548542 (-) // 97.01 // q23.1
11717748_x_at	-0.129686	0.00926208	-0.00926208	0.0413437	-0.0485649	0.0148153	0.584422	0.420931	-1.03223	-0.0457602	1.03223	down	MCTS1	28985	0006351 // transcription, DNA-dependent // inferred from electronic annotation /// 0006355 // regulation of transcription, DNA-dependent // inferred from electronic annotation /// 0006974 // response to DNA damage stimulus // inferred from electronic annotation /// 0007049 // cell cycle // inferred from electronic annotation /// 0008284 // positive regulation of cell proliferation // traceable au…	0005737 // cytoplasm // inferred from electronic annotation	0003723 // RNA binding // inferred from electronic annotation	chrX:119737687-119755014 (+) // 74.21 // q24
11742257_a_at	0.0575838	-0.0509739	-0.103803	0.0564425	-0.00546885	0.00546908	0.539744	0.373739	-1.03613	-0.0512118	1.03613	down	PTGER3	5733	0001660 // fever generation // inferred from electronic annotation /// 0006351 // transcription, DNA-dependent // traceable author statement /// 0007165 // signal transduction // inferred from electronic annotation /// 0007186 // G-protein coupled receptor signaling pathway // traceable author statement /// 0007186 // G-protein coupled receptor signaling pathway // inferred from electronic annota…	0005635 // nuclear envelope // traceable author statement /// 0005886 // plasma membrane // traceable author statement /// 0005886 // plasma membrane // inferred from electronic annotation /// 0005887 // integral to plasma membrane // traceable author statement /// 0016020 // membrane // inferred from electronic annotation /// 0016021 // integral to membrane // inferred from electronic annotation…	0004871 // signal transducer activity // inferred from electronic annotation /// 0004872 // receptor activity // inferred from electronic annotation /// 0004879 // ligand-activated sequence-specific DNA binding RNA polymerase II transcription factor activity // traceable author statement /// 0004930 // G-protein coupled receptor activity // inferred from electronic annotation /// 0004955 // prost…	chr1:71418114-71513491 (-) // 92.12 // p31.1
11752824_a_at	0.0549068	0.048368	-0.111907	-0.00917292	0.00917292	-0.037415	0.925618	0.872748	1.00667	0.00959407	1.00667	up	C17orf61-PLSCR3 /// PLSCR3	100529211 /// 57048	0017121 // phospholipid scrambling // non-traceable author statement /// 0042593 // glucose homeostasis // inferred from electronic annotation /// 0042632 // cholesterol homeostasis // inferred from electronic annotation /// 0071222 // cellular response to lipopolysaccharide // inferred from electronic annotation	0005886 // plasma membrane // inferred from direct assay /// 0005886 // plasma membrane // non-traceable author statement /// 0016020 // membrane // inferred from electronic annotation /// 0016021 // integral to membrane // inferred from electronic annotation	0005509 // calcium ion binding // non-traceable author statement /// 0005515 // protein binding // inferred from physical interaction /// 0017124 // SH3 domain binding // inferred from electronic annotation /// 0017128 // phospholipid scramblase activity // non-traceable author statement /// 0048306 // calcium-dependent protein binding // inferred from physical interaction	chr17:7293535-7307414 (-) // 97.7 // p13.1
11751321_a_at	-0.01056	0.138718	0.01056	-0.0533333	0.0512505	-0.29496	0.429868	0.266685	1.10592	0.145253	1.10592	up	CRIM1	51232	0001558 // regulation of cell growth // inferred from electronic annotation /// 0007399 // nervous system development // traceable author statement /// 0043086 // negative regulation of catalytic activity // inferred from electronic annotation /// 0048009 // insulin-like growth factor receptor signaling pathway // traceable author statement	0005576 // extracellular region // inferred from electronic annotation /// 0005886 // plasma membrane // inferred from electronic annotation /// 0016020 // membrane // inferred from electronic annotation /// 0016021 // integral to membrane // inferred from electronic annotation /// 0016021 // integral to membrane // traceable author statement	0004857 // enzyme inhibitor activity // inferred from electronic annotation /// 0004867 // serine-type endopeptidase inhibitor activity // inferred from electronic annotation /// 0005010 // insulin-like growth factor-activated receptor activity // traceable author statement /// 0005520 // insulin-like growth factor binding // inferred from electronic annotation	chr2:36744515-36776110 (+) // 88.26 // p22.2
11756118_s_at	-0.106726	0.0307179	-0.0248318	0.114365	0.0170574	-0.0170574	0.433331	0.269929	-1.05098	-0.0717347	1.05098	down	MLL5	55904	0002446 // neutrophil mediated immunity // inferred from sequence or structural similarity /// 0002446 // neutrophil mediated immunity // inferred from electronic annotation /// 0006306 // DNA methylation // inferred from sequence or structural similarity /// 0006306 // DNA methylation // inferred from electronic annotation /// 0006351 // transcription, DNA-dependent // inferred from electronic a…	0005634 // nucleus // inferred from electronic annotation /// 0016607 // nuclear speck // inferred from electronic annotation /// 0070688 // MLL5-L complex // inferred from direct assay	0003713 // transcription coactivator activity // inferred from mutant phenotype /// 0005515 // protein binding // inferred from physical interaction /// 0008168 // methyltransferase activity // inferred from electronic annotation /// 0008270 // zinc ion binding // inferred from electronic annotation /// 0016740 // transferase activity // inferred from electronic annotation /// 0018024 // histone-…	chr7:104753404-104754527 (+) // 99.05 // q22.3
11728751_a_at	0.305338	0.145422	0.229848	-0.161517	-0.145422	-0.237074	0.0108935	0.00165779	1.32704	0.408207	1.32704	up	OSBP	5007	0006810 // transport // inferred from electronic annotation /// 0006869 // lipid transport // inferred from electronic annotation	0000139 // Golgi membrane // inferred from electronic annotation /// 0005737 // cytoplasm // inferred from electronic annotation /// 0005794 // Golgi apparatus // inferred from electronic annotation /// 0016020 // membrane // inferred from electronic annotation	0005543 // phospholipid binding // inferred from electronic annotation /// 0008142 // oxysterol binding // traceable author statement /// 0008289 // lipid binding // inferred from electronic annotation	chr11:59341871-59383617 (-) // 94.22 // q12.1
11715402_x_at	-0.0388021	-0.0126066	-0.0119295	0.0145588	0.0136271	0.0119295	0.059557	0.0177917	-1.02419	-0.0344845	1.02419	down	ILF2	3608	0006351 // transcription, DNA-dependent // inferred from direct assay /// 0006351 // transcription, DNA-dependent // inferred from electronic annotation /// 0006355 // regulation of transcription, DNA-dependent // inferred from electronic annotation /// 0006955 // immune response // inferred from electronic annotation /// 0045893 // positive regulation of transcription, DNA-dependent // inferred …	0005634 // nucleus // inferred from direct assay /// 0005634 // nucleus // inferred from electronic annotation /// 0005730 // nucleolus // inferred from direct assay /// 0005730 // nucleolus // inferred from electronic annotation /// 0005737 // cytoplasm // inferred from electronic annotation /// 0030529 // ribonucleoprotein complex // inferred from direct assay	0003677 // DNA binding // inferred from direct assay /// 0003677 // DNA binding // inferred from electronic annotation /// 0003723 // RNA binding // inferred from electronic annotation /// 0003725 // double-stranded RNA binding // inferred from direct assay /// 0005515 // protein binding // inferred from physical interaction /// 0005524 // ATP binding // inferred from electronic annotation /// 00…	chr1:153634263-153643471 (-) // 64.49 // q21.3
11760528_at	-0.0991089	0.00830817	-0.00830793	0.0415623	-0.307797	0.220711	0.951362	0.915826	-1.01246	-0.0178617	1.01246	down	RDM1	201299	0006281 // DNA repair // inferred from electronic annotation /// 0006310 // DNA recombination // inferred from electronic annotation	0005634 // nucleus // inferred from electronic annotation /// 0005730 // nucleolus // inferred from direct assay /// 0005730 // nucleolus // inferred from electronic annotation /// 0005737 // cytoplasm // inferred from direct assay /// 0005737 // cytoplasm // inferred from electronic annotation /// 0015030 // Cajal body // inferred from electronic annotation /// 0016605 // PML body // inferred fr…	0000166 // nucleotide binding // inferred from electronic annotation /// 0003676 // nucleic acid binding // inferred from electronic annotation /// 0003677 // DNA binding // inferred from electronic annotation /// 0003723 // RNA binding // inferred from electronic annotation	chr17:34249158-34257770 (-) // 85.03 // q12
11744420_at	-0.0312796	0.232	0.217352	-0.0141129	-0.0696278	0.0141134	0.27532	0.141431	1.11928	0.162567	1.11928	up	MIR600 /// MIR600HG	693185 /// 81571				chr9:125871772-125877756 (-) // 95.55 // q33.3
11761323_at	0.00222468	-0.348964	-0.00222445	-0.358841	0.00961852	0.257372	0.816497	0.708622	-1.06121	-0.0857046	1.06121	down	COMMD9	29099				chr11:36296052-36310976 (-) // 89.17 // p13
11744583_s_at	-0.0233788	-0.0791211	-0.0869741	0.0306344	0.0528579	0.0233788	0.0410017	0.0107263	-1.07087	-0.0987818	1.07087	down	AMDHD2 /// CEMP1	51005 /// 752014	0005975 // carbohydrate metabolic process // inferred from electronic annotation /// 0006044 // N-acetylglucosamine metabolic process // inferred from electronic annotation	0005737 // cytoplasm // inferred from electronic annotation	0008448 // N-acetylglucosamine-6-phosphate deacetylase activity // inferred from electronic annotation /// 0016787 // hydrolase activity // inferred from electronic annotation /// 0016810 // hydrolase activity, acting on carbon-nitrogen (but not peptide) bonds // inferred from electronic annotation	chr16:2570365-2579732 (+) // 99.19 // p13.3
11758184_x_at	-0.0871906	-0.0424776	-0.0049572	0.159043	0.129851	0.0049572	0.136577	0.0540856	-1.10407	-0.142826	1.10407	down	KRT8	3856	0007010 // cytoskeleton organization // non-traceable author statement /// 0044419 // interspecies interaction between organisms // inferred from electronic annotation	0005634 // nucleus // inferred from electronic annotation /// 0005654 // nucleoplasm // inferred from electronic annotation /// 0005737 // cytoplasm // inferred from direct assay /// 0005737 // cytoplasm // inferred from electronic annotation /// 0005882 // intermediate filament // non-traceable author statement /// 0005882 // intermediate filament // inferred from electronic annotation /// 00163…	0005198 // structural molecule activity // non-traceable author statement /// 0005198 // structural molecule activity // inferred from electronic annotation /// 0005515 // protein binding // inferred from physical interaction	chr12:53293746-53298821 (-) // 86.05 // q13.13
11725061_a_at	0.110288	0.0382843	0.12038	-0.155112	-0.0691834	-0.0382843	0.0528926	0.0151498	1.13067	0.177177	1.13067	up	USP7	7874	0006281 // DNA repair // inferred from electronic annotation /// 0006283 // transcription-coupled nucleotide-excision repair // inferred from mutant phenotype /// 0006508 // proteolysis // inferred from electronic annotation /// 0006511 // ubiquitin-dependent protein catabolic process // inferred from electronic annotation /// 0006917 // induction of apoptosis // inferred from electronic annotati…	0005634 // nucleus // inferred from direct assay /// 0005634 // nucleus // inferred from electronic annotation /// 0005634 // nucleus // traceable author statement /// 0005737 // cytoplasm // inferred from electronic annotation /// 0005829 // cytosol // inferred from direct assay /// 0016605 // PML body // inferred from electronic annotation	0002039 // p53 binding // inferred from direct assay /// 0004197 // cysteine-type endopeptidase activity // traceable author statement /// 0004221 // ubiquitin thiolesterase activity // inferred from mutant phenotype /// 0004221 // ubiquitin thiolesterase activity // inferred from electronic annotation /// 0004843 // ubiquitin-specific protease activity // inferred from direct assay /// 0004843 /…	chr16:8985953-9057341 (-) // 95.32 // p13.2
11751316_x_at	-0.00981712	-0.0167723	0.0036335	0.10526	0.0177302	-0.0036335	0.39223	0.23368	-1.03343	-0.0474375	1.03343	down	EPS8L1	54869	0016310 // phosphorylation // inferred from electronic annotation	0005737 // cytoplasm // inferred from electronic annotation	0004872 // receptor activity // inferred from electronic annotation /// 0016301 // kinase activity // inferred from electronic annotation	chr19:55591759-55599057 (+) // 97.73 // q13.42
11719866_at	-0.121758	0.0998879	0.0490413	-0.129585	0.0511031	-0.0490413	0.716937	0.576829	1.03639	0.0515649	1.03639	up	SVEP1	79987	0007155 // cell adhesion // inferred from electronic annotation	0005576 // extracellular region // inferred from electronic annotation /// 0005737 // cytoplasm // inferred from electronic annotation /// 0005737 // cytoplasm // inferred from direct assay /// 0016020 // membrane // inferred from electronic annotation	0005509 // calcium ion binding // inferred from electronic annotation	chr9:113127527-113342160 (-) // 98.99 // q31.3
11747376_s_at	0.0328226	0.302609	0.159524	-0.0328221	-0.369231	-0.221871	0.109762	0.0403115	1.29501	0.37296	1.29501	up	CCPG1	9236	0007049 // cell cycle // inferred from electronic annotation /// 0045944 // positive regulation of transcription from RNA polymerase II promoter // inferred from electronic annotation /// 2001106 // regulation of Rho guanyl-nucleotide exchange factor activity // inferred from electronic annotation	0016020 // membrane // inferred from electronic annotation /// 0016021 // integral to membrane // inferred from electronic annotation		chr15:55651043-55665781 (-) // 91.73 // q21.3
11740760_at	-0.11813	0.0353756	0.0106249	-0.0845489	-0.0106251	0.264169	0.676176	0.527416	-1.05729	-0.0803748	1.05729	down	TRPA1	8989	0006810 // transport // inferred from electronic annotation /// 0006811 // ion transport // traceable author statement /// 0006811 // ion transport // inferred from electronic annotation /// 0006816 // calcium ion transport // inferred from electronic annotation /// 0009409 // response to cold // inferred from electronic annotation /// 0042493 // response to drug // inferred from electronic annot…	0005887 // integral to plasma membrane // traceable author statement /// 0016020 // membrane // inferred from electronic annotation /// 0016021 // integral to membrane // inferred from electronic annotation /// 0032421 // stereocilium bundle // inferred from electronic annotation	0005216 // ion channel activity // inferred from electronic annotation /// 0005262 // calcium channel activity // inferred from electronic annotation /// 0015267 // channel activity // traceable author statement /// 0015267 // channel activity // inferred from electronic annotation	chr8:72933485-72987852 (-) // 95.44 // q13.3
11719788_s_at	-0.0978346	0.00392342	-0.0568237	0.0682249	0.0270224	-0.00392246	0.198661	0.0897163	-1.05752	-0.0806866	1.05752	down	TUBB2A	7280	0006184 // GTP catabolic process // inferred from electronic annotation /// 0006457 // protein folding // traceable author statement /// 0007017 // microtubule-based process // inferred from electronic annotation /// 0007018 // microtubule-based movement // inferred from electronic annotation /// 0007067 // mitosis // inferred from electronic annotation /// 0030182 // neuron differentiation // in…	0005737 // cytoplasm // inferred from electronic annotation /// 0005856 // cytoskeleton // inferred from electronic annotation /// 0005874 // microtubule // inferred from direct assay /// 0005874 // microtubule // inferred from electronic annotation /// 0043234 // protein complex // inferred from electronic annotation	0000166 // nucleotide binding // inferred from electronic annotation /// 0003924 // GTPase activity // inferred from electronic annotation /// 0005198 // structural molecule activity // inferred from electronic annotation /// 0005525 // GTP binding // inferred from electronic annotation /// 0042277 // peptide binding // inferred from electronic annotation	chr6:3153911-3157809 (-) // 96.98 // p25.2
11751189_x_at	-0.188514	-0.010623	0.116592	-0.086998	0.0669506	0.010623	0.890641	0.818102	-1.01704	-0.0243734	1.01704	down	RIMS1	22999	0006461 // protein complex assembly // inferred from direct assay /// 0006810 // transport // inferred from electronic annotation /// 0006836 // neurotransmitter transport // inferred from electronic annotation /// 0006886 // intracellular protein transport // inferred from electronic annotation /// 0006887 // exocytosis // inferred from electronic annotation /// 0006944 // cellular membrane fusi…	0005622 // intracellular // inferred from electronic annotation /// 0005886 // plasma membrane // traceable author statement /// 0005886 // plasma membrane // inferred from electronic annotation /// 0016020 // membrane // inferred from electronic annotation /// 0030054 // cell junction // inferred from electronic annotation /// 0042734 // presynaptic membrane // inferred from sequence or structur…	0005083 // small GTPase regulator activity // traceable author statement /// 0005515 // protein binding // inferred from physical interaction /// 0017137 // Rab GTPase binding // inferred from electronic annotation /// 0046872 // metal ion binding // inferred from electronic annotation	chr6:72970401-73110962 (+) // 92.33 // q13
11748164_a_at	-0.373177	-0.173918	-0.282326	0.236812	0.173918	0.192415	0.00966237	0.00139727	-1.39235	-0.477522	1.39235	down	VCAN	1462	0007155 // cell adhesion // inferred from electronic annotation /// 0007155 // cell adhesion // traceable author statement /// 0007275 // multicellular organismal development // traceable author statement /// 0007507 // heart development // inferred from electronic annotation /// 0008037 // cell recognition // traceable author statement /// 0008347 // glial cell migration // inferred from direct …	0005576 // extracellular region // inferred from electronic annotation /// 0005578 // proteinaceous extracellular matrix // inferred from electronic annotation /// 0005578 // proteinaceous extracellular matrix // traceable author statement /// 0005615 // extracellular space // inferred from direct assay /// 0031012 // extracellular matrix // inferred from direct assay /// 0031012 // extracellular…	0005509 // calcium ion binding // inferred from electronic annotation /// 0005539 // glycosaminoglycan binding // traceable author statement /// 0005540 // hyaluronic acid binding // inferred from electronic annotation /// 0005540 // hyaluronic acid binding // traceable author statement /// 0030246 // carbohydrate binding // inferred from electronic annotation	chr5:82767582-82876981 (+) // 99.9 // q14.2
11721203_at	-0.0493889	0.0125122	-0.187453	0.140293	0.055089	-0.0125122	0.273105	0.139762	-1.09865	-0.135733	1.09865	down	SCARF2	91179	0007155 // cell adhesion // inferred from electronic annotation	0016020 // membrane // inferred from electronic annotation /// 0016021 // integral to membrane // inferred from electronic annotation	0004872 // receptor activity // inferred from electronic annotation /// 0005515 // protein binding // inferred from physical interaction	chr22:20778873-20792146 (-) // 91.56 // q11.21
11735804_x_at	0.109334	0.215228	0.0326448	-0.0326448	-0.0872126	-0.306726	0.143201	0.0577733	1.19853	0.261263	1.19853	up	NAT6	24142		0005737 // cytoplasm // inferred from direct assay /// 0005737 // cytoplasm // inferred from electronic annotation /// 0005739 // mitochondrion // inferred from direct assay	0008080 // N-acetyltransferase activity // inferred from electronic annotation /// 0016740 // transferase activity // inferred from electronic annotation /// 0016746 // transferase activity, transferring acyl groups // inferred from electronic annotation	chr3:50333833-50336847 (-) // 98.23 // p21.31
11719412_at	0.218404	0.0144162	0.0202627	-0.100911	-0.0930004	-0.0144162	0.217081	0.101195	1.1125	0.153804	1.1125	up	PBX1	5087	0001655 // urogenital system development // inferred from electronic annotation /// 0001658 // branching involved in ureteric bud morphogenesis // inferred from electronic annotation /// 0006351 // transcription, DNA-dependent // inferred from electronic annotation /// 0006355 // regulation of transcription, DNA-dependent // non-traceable author statement /// 0006355 // regulation of transcriptio…	0005634 // nucleus // inferred from direct assay /// 0005634 // nucleus // inferred from electronic annotation /// 0005667 // transcription factor complex // inferred from electronic annotation /// 0005730 // nucleolus // inferred from direct assay /// 0005737 // cytoplasm // inferred from direct assay /// 0005737 // cytoplasm // inferred from electronic annotation	0003677 // DNA binding // inferred from direct assay /// 0003677 // DNA binding // inferred from electronic annotation /// 0003700 // sequence-specific DNA binding transcription factor activity // inferred from electronic annotation /// 0003700 // sequence-specific DNA binding transcription factor activity // non-traceable author statement /// 0005515 // protein binding // inferred from physical …	chr1:164528434-164821067 (+) // 94.97 // q23.3
11726441_a_at	0.0436544	0.0530329	0.0259399	-0.0337048	-0.0259399	-0.0497227	0.0118295	0.00186944	1.05506	0.0773316	1.05506	up	ERCC6L	54821	0000087 // M phase of mitotic cell cycle // traceable author statement /// 0000236 // mitotic prometaphase // traceable author statement /// 0000278 // mitotic cell cycle // traceable author statement /// 0007049 // cell cycle // inferred from electronic annotation /// 0007067 // mitosis // inferred from electronic annotation /// 0051301 // cell division // inferred from electronic annotation	0000775 // chromosome, centromeric region // inferred from electronic annotation /// 0000776 // kinetochore // inferred from electronic annotation /// 0000777 // condensed chromosome kinetochore // inferred from electronic annotation /// 0005694 // chromosome // inferred from electronic annotation /// 0005829 // cytosol // traceable author statement	0000166 // nucleotide binding // inferred from electronic annotation /// 0003676 // nucleic acid binding // inferred from electronic annotation /// 0003677 // DNA binding // inferred from electronic annotation /// 0004386 // helicase activity // inferred from electronic annotation /// 0005524 // ATP binding // inferred from electronic annotation /// 0016787 // hydrolase activity // inferred from …	chrX:71424514-71458897 (-) // 98.01 // q13.1
11761498_at	-0.130559	-0.0892491	-0.0199304	0.159145	0.0199304	0.172669	0.0839203	0.0280669	-1.14644	-0.197161	1.14644	down	FAM129C	199786			0005543 // phospholipid binding // inferred from electronic annotation	chr19:17634109-17660620 (+) // 99.07 // p13.11
11761732_at	-0.0118337	0.137042	-0.152647	-0.0117579	0.0466328	0.0117579	0.870299	0.786713	-1.01726	-0.0246903	1.01726	down	PILRA	29992	0007165 // signal transduction // inferred from direct assay /// 0044419 // interspecies interaction between organisms // inferred from electronic annotation	0005576 // extracellular region // inferred from electronic annotation /// 0005886 // plasma membrane // inferred from electronic annotation /// 0016020 // membrane // inferred from electronic annotation /// 0016021 // integral to membrane // inferred from electronic annotation	0004872 // receptor activity // inferred from electronic annotation /// 0005515 // protein binding // inferred from physical interaction	chr7:99971150-99972732 (+) // 99.92 // q22.1
11762481_at	-0.0427575	-0.137794	0.093904	-0.0812306	0.0427575	0.0617733	0.790481	0.673727	-1.02573	-0.0366494	1.02573	down	LAMB4	22798	0007155 // cell adhesion // inferred from electronic annotation	0005576 // extracellular region // inferred from electronic annotation /// 0005578 // proteinaceous extracellular matrix // inferred from electronic annotation /// 0005604 // basement membrane // inferred from electronic annotation		chr7:107715982-107763640 (-) // 86.92 // q31.1
11722116_a_at	-0.148921	0.0042572	-0.040813	0.0830469	0.0951028	-0.0042572	0.20838	0.0957465	-1.08658	-0.11979	1.08658	down	RARB	5915	0000122 // negative regulation of transcription from RNA polymerase II promoter // inferred from electronic annotation /// 0001657 // ureteric bud development // inferred from electronic annotation /// 0003417 // growth plate cartilage development // inferred from electronic annotation /// 0006351 // transcription, DNA-dependent // inferred from electronic annotation /// 0006355 // regulation of …	0005634 // nucleus // inferred from direct assay /// 0005634 // nucleus // inferred from electronic annotation /// 0005654 // nucleoplasm // traceable author statement /// 0005737 // cytoplasm // inferred from electronic annotation	0003677 // DNA binding // traceable author statement /// 0003677 // DNA binding // inferred from electronic annotation /// 0003700 // sequence-specific DNA binding transcription factor activity // inferred from electronic annotation /// 0003707 // steroid hormone receptor activity // inferred from electronic annotation /// 0003708 // retinoic acid receptor activity // inferred from electronic ann…	chr3:25469009-25639423 (+) // 95.75 // p24.2
11737598_a_at	-0.0118561	0.0781698	-0.154785	0.0118561	0.0284791	-0.0239315	0.767234	0.641699	-1.02453	-0.0349583	1.02453	down	C17orf67	339210		0005576 // extracellular region // inferred from electronic annotation		chr17:54869274-54911256 (-) // 82.48 // q22
11728523_a_at	-0.218507	-0.186204	-0.17951	0.384152	0.425773	0.17951	0.0142007	0.00243279	-1.43849	-0.524552	1.43849	down	MYCL1	4610	0006355 // regulation of transcription, DNA-dependent // non-traceable author statement /// 0006355 // regulation of transcription, DNA-dependent // inferred from electronic annotation	0005634 // nucleus // non-traceable author statement /// 0005634 // nucleus // inferred from electronic annotation	0003677 // DNA binding // non-traceable author statement /// 0003677 // DNA binding // traceable author statement /// 0003677 // DNA binding // inferred from electronic annotation /// 0003700 // sequence-specific DNA binding transcription factor activity // non-traceable author statement /// 0003700 // sequence-specific DNA binding transcription factor activity // inferred from electronic annotat…	chr1:40361099-40367687 (-) // 97.97 // p34.2
11728439_at	-0.123827	-0.287366	-0.433195	0.49668	0.123827	0.340898	0.0466421	0.0127316	-1.51775	-0.601931	1.51775	down	BRWD1	54014	0006351 // transcription, DNA-dependent // inferred from electronic annotation /// 0006355 // regulation of transcription, DNA-dependent // inferred from electronic annotation /// 0006357 // regulation of transcription from RNA polymerase II promoter // inferred from electronic annotation /// 0007010 // cytoskeleton organization // inferred from mutant phenotype /// 0008360 // regulation of cell …	0005634 // nucleus // inferred from direct assay /// 0005634 // nucleus // inferred from electronic annotation /// 0005730 // nucleolus // inferred from direct assay /// 0005737 // cytoplasm // inferred from direct assay /// 0005737 // cytoplasm // inferred from electronic annotation		chr21:40557818-40685556 (-) // 98.43 // q22.2
11750366_a_at	0.125052	-0.207897	0.272766	0.0198357	-0.112682	-0.0198357	0.679442	0.531559	1.07242	0.100868	1.07242	up	EPHA6	285220	0006468 // protein phosphorylation // inferred from electronic annotation /// 0007169 // transmembrane receptor protein tyrosine kinase signaling pathway // inferred from electronic annotation /// 0016310 // phosphorylation // inferred from electronic annotation /// 0048013 // ephrin receptor signaling pathway // inferred from electronic annotation	0005887 // integral to plasma membrane // inferred from electronic annotation /// 0016020 // membrane // inferred from electronic annotation /// 0016021 // integral to membrane // inferred from electronic annotation	0000166 // nucleotide binding // inferred from electronic annotation /// 0004672 // protein kinase activity // inferred from electronic annotation /// 0004713 // protein tyrosine kinase activity // inferred from electronic annotation /// 0004714 // transmembrane receptor protein tyrosine kinase activity // inferred from electronic annotation /// 0004872 // receptor activity // inferred from elect…	chr3:97158434-97356907 (+) // 95.38 // q11.2
11760384_at	0.00149965	-0.206088	-0.127147	-0.00150013	0.094028	0.0308638	0.19137	0.0852456	-1.11088	-0.151709	1.11088	down	PPP2R5C	5527	0006977 // DNA damage response, signal transduction by p53 class mediator resulting in cell cycle arrest // inferred from direct assay /// 0007165 // signal transduction // inferred from electronic annotation /// 0007165 // signal transduction // non-traceable author statement /// 0008285 // negative regulation of cell proliferation // inferred from direct assay /// 0016485 // protein processing …	0000159 // protein phosphatase type 2A complex // inferred from direct assay /// 0000159 // protein phosphatase type 2A complex // inferred from electronic annotation /// 0000159 // protein phosphatase type 2A complex // non-traceable author statement /// 0000775 // chromosome, centromeric region // inferred from direct assay /// 0000775 // chromosome, centromeric region // inferred from electron…	0005515 // protein binding // inferred from physical interaction /// 0008233 // peptidase activity // inferred from direct assay /// 0008601 // protein phosphatase type 2A regulator activity // inferred from direct assay /// 0008601 // protein phosphatase type 2A regulator activity // inferred from electronic annotation /// 0008601 // protein phosphatase type 2A regulator activity // non-traceabl…	chr14:102276167-102349570 (+) // 99.53 // q32.31
11737444_a_at	0.224528	0.0369842	-0.0597937	0.351251	-0.0369844	-0.12101	0.992874	0.987386	1.00196	0.00282051	1.00196	up	GPR156	165829	0007165 // signal transduction // inferred from electronic annotation /// 0007186 // G-protein coupled receptor signaling pathway // inferred from electronic annotation	0005886 // plasma membrane // inferred from electronic annotation /// 0016020 // membrane // inferred from electronic annotation /// 0016021 // integral to membrane // inferred from electronic annotation	0004871 // signal transducer activity // inferred from electronic annotation /// 0004872 // receptor activity // inferred from electronic annotation /// 0004930 // G-protein coupled receptor activity // inferred from electronic annotation /// 0004965 // G-protein coupled GABA receptor activity // inferred from electronic annotation	chr3:119885676-120004242 (-) // 97.27 // q13.33
11723152_a_at	0.254197	0.0918918	0.133707	-0.112991	-0.0918913	-0.0918913	0.027599	0.00623052	1.19653	0.258856	1.19653	up	GON4L	54856	0006355 // regulation of transcription, DNA-dependent // inferred from electronic annotation	0005634 // nucleus // inferred from direct assay /// 0005634 // nucleus // inferred from electronic annotation /// 0005730 // nucleolus // inferred from direct assay /// 0005737 // cytoplasm // inferred from direct assay	0003677 // DNA binding // inferred from electronic annotation	chr1:155719507-155823598 (-) // 96.24 // q22
11750968_x_at	-0.132298	-0.30724	-0.161797	0.167288	0.132298	0.195039	0.0165905	0.00305227	-1.28817	-0.36532	1.28817	down	NFIC	4782	0000122 // negative regulation of transcription from RNA polymerase II promoter // inferred from direct assay /// 0000122 // negative regulation of transcription from RNA polymerase II promoter // inferred from genetic interaction /// 0006260 // DNA replication // inferred from electronic annotation /// 0006351 // transcription, DNA-dependent // inferred from electronic annotation /// 0006355 // …	0005622 // intracellular // inferred from electronic annotation /// 0005634 // nucleus // inferred from electronic annotation	0003677 // DNA binding // inferred from electronic annotation /// 0003700 // sequence-specific DNA binding transcription factor activity // inferred from direct assay /// 0003700 // sequence-specific DNA binding transcription factor activity // inferred from electronic annotation /// 0003700 // sequence-specific DNA binding transcription factor activity // traceable author statement	chr19:3381708-3463140 (+) // 92.67 // p13.3
11741727_a_at	-0.0425863	0.0701385	0.0363693	-0.150949	0.0564585	-0.0363698	0.562774	0.397853	1.04603	0.0649271	1.04603	up	NEDD1	121441	0000086 // G2/M transition of mitotic cell cycle // traceable author statement /// 0000278 // mitotic cell cycle // traceable author statement /// 0007049 // cell cycle // inferred from electronic annotation /// 0007067 // mitosis // inferred from electronic annotation /// 0051301 // cell division // inferred from electronic annotation	0000242 // pericentriolar material // inferred from electronic annotation /// 0000922 // spindle pole // inferred from electronic annotation /// 0005737 // cytoplasm // inferred from electronic annotation /// 0005813 // centrosome // inferred from direct assay /// 0005813 // centrosome // inferred from electronic annotation /// 0005814 // centriole // inferred from electronic annotation /// 00058…		chr12:97301243-97347461 (+) // 97.93 // q23.1
11754840_s_at	-0.127154	-0.08933	0.154127	0.0668697	-0.0668695	0.0820797	0.777304	0.655456	-1.03394	-0.0481454	1.03394	down	LINC00470	56651				chr18:1268311-1276078 (-) // 58.43 // p11.32
11757267_x_at	-0.0138617	-0.0910816	-0.00254631	0.0306349	0.00254631	0.018837	0.274187	0.140519	-1.03754	-0.0531692	1.03754	down	SIRT2	22933	0000183 // chromatin silencing at rDNA // non-traceable author statement /// 0006342 // chromatin silencing // non-traceable author statement /// 0006348 // chromatin silencing at telomere // non-traceable author statement /// 0006471 // protein ADP-ribosylation // non-traceable author statement /// 0006471 // protein ADP-ribosylation // traceable author statement /// 0006476 // protein deacetyla…	0005677 // chromatin silencing complex // non-traceable author statement /// 0005737 // cytoplasm // inferred from direct assay /// 0005737 // cytoplasm // inferred from electronic annotation /// 0005856 // cytoskeleton // inferred from electronic annotation /// 0005874 // microtubule // inferred from direct assay /// 0005874 // microtubule // inferred from electronic annotation	0003950 // NAD+ ADP-ribosyltransferase activity // traceable author statement /// 0005515 // protein binding // inferred from physical interaction /// 0008134 // transcription factor binding // inferred from physical interaction /// 0008270 // zinc ion binding // inferred from direct assay /// 0008270 // zinc ion binding // inferred from electronic annotation /// 0016787 // hydrolase activity // …	chr19:39369199-39369442 (-) // 35.79 // q13.2
11730333_at	0.0030365	-0.0604315	-0.196774	0.0245991	0.140358	-0.0030365	0.262463	0.132244	-1.10091	-0.138697	1.10091	down	DPYSL4	10570	0006208 // pyrimidine base catabolic process // inferred from electronic annotation /// 0007399 // nervous system development // traceable author statement /// 0007411 // axon guidance // traceable author statement	0005737 // cytoplasm // inferred from electronic annotation /// 0005829 // cytosol // traceable author statement	0016787 // hydrolase activity // inferred from electronic annotation /// 0016810 // hydrolase activity, acting on carbon-nitrogen (but not peptide) bonds // inferred from electronic annotation /// 0016812 // hydrolase activity, acting on carbon-nitrogen (but not peptide) bonds, in cyclic amides // inferred from electronic annotation	chr10:134000403-134019280 (+) // 97.43 // q26.3
11730717_x_at	-0.163899	-0.326683	0.235392	0.0459738	-0.0459735	0.118399	0.66418	0.512868	-1.09015	-0.124529	1.09015	down	PAGE5	90737				chrX:55246788-55250533 (+) // 87.59 // p11.21
11718361_at	0.0627828	0.0497127	0.0200043	-0.122668	-0.0929451	-0.0200038	0.0664342	0.0205469	1.08877	0.122706	1.08877	up	COIL	8161		0001674 // female germ cell nucleus // inferred from electronic annotation /// 0005634 // nucleus // traceable author statement /// 0005634 // nucleus // inferred from electronic annotation /// 0005654 // nucleoplasm // inferred from direct assay /// 0005730 // nucleolus // inferred from direct assay /// 0015030 // Cajal body // inferred from direct assay /// 0015030 // Cajal body // inferred fro…	0005515 // protein binding // inferred from physical interaction /// 0008022 // protein C-terminus binding // inferred from physical interaction /// 0015036 // disulfide oxidoreductase activity // inferred from electronic annotation /// 0042802 // identical protein binding // inferred from physical interaction	chr17:55015559-55038404 (-) // 97.19 // q22
11735219_at	0.135843	0.148983	0.0526695	-0.0526695	-0.0740528	-0.171368	0.0419608	0.0110502	1.15818	0.211862	1.15818	up	COL10A1	1300	0001501 // skeletal system development // traceable author statement	0005576 // extracellular region // inferred from electronic annotation /// 0005578 // proteinaceous extracellular matrix // inferred from electronic annotation /// 0005581 // collagen // inferred from electronic annotation /// 0005581 // collagen // traceable author statement /// 0005938 // cell cortex // inferred from electronic annotation	0046872 // metal ion binding // inferred from electronic annotation	chr6:116440084-116447296 (-) // 97.71 // q22.1
11718052_a_at	0.292178	0.310557	0.201224	-0.29749	-0.249884	-0.201224	0.00356751	0.00029258	1.43149	0.517519	1.43149	up	TBC1D23	55773	0032313 // regulation of Rab GTPase activity // inferred from electronic annotation /// 0032851 // positive regulation of Rab GTPase activity // inferred from electronic annotation	0005622 // intracellular // inferred from electronic annotation	0005097 // Rab GTPase activator activity // inferred from electronic annotation	chr3:99979660-100044095 (+) // 96.18 // q12.1
11749907_a_at	-0.101731	0.00886917	-0.00886917	-0.0297623	0.150065	0.0379417	0.398262	0.238828	-1.06191	-0.0866586	1.06191	down	TRIM63	84676	0007165 // signal transduction // non-traceable author statement /// 0016567 // protein ubiquitination // inferred from electronic annotation /// 0043161 // proteasomal ubiquitin-dependent protein catabolic process // inferred from electronic annotation	0005622 // intracellular // inferred from electronic annotation /// 0005634 // nucleus // inferred from electronic annotation /// 0005737 // cytoplasm // inferred from direct assay /// 0005737 // cytoplasm // non-traceable author statement /// 0005737 // cytoplasm // inferred from electronic annotation /// 0005874 // microtubule // non-traceable author statement	0004842 // ubiquitin-protein ligase activity // inferred from electronic annotation /// 0004871 // signal transducer activity // non-traceable author statement /// 0008270 // zinc ion binding // inferred from electronic annotation /// 0016874 // ligase activity // inferred from electronic annotation /// 0031432 // titin binding // inferred from direct assay /// 0046872 // metal ion binding // inf…	chr1:26378141-26394121 (-) // 100.0 // p36.11
11739616_x_at	0.00721168	0.0289021	0.00681305	-0.0162563	-0.00681305	-0.053338	0.160722	0.0673606	1.02796	0.039778	1.02796	up	CD3EAP	10849	0007169 // transmembrane receptor protein tyrosine kinase signaling pathway // traceable author statement /// 0009303 // rRNA transcription // inferred from electronic annotation /// 0009303 // rRNA transcription // traceable author statement	0000120 // RNA polymerase I transcription factor complex // traceable author statement /// 0005634 // nucleus // inferred from direct assay /// 0005634 // nucleus // inferred from electronic annotation /// 0005694 // chromosome // inferred from electronic annotation /// 0005730 // nucleolus // inferred from direct assay /// 0005730 // nucleolus // inferred from electronic annotation /// 0005730 /…	0003899 // DNA-directed RNA polymerase activity // inferred from electronic annotation	chr19:45909386-45955388 (+) // 71.15 // q13.32
11737631_a_at	0.142414	-0.0198405	0.0518503	0.0198405	-0.0722926	-0.0758462	0.28496	0.148281	1.07245	0.100907	1.07245	up	SLC26A7	115111	0001696 // gastric acid secretion // inferred from electronic annotation /// 0006810 // transport // inferred from electronic annotation /// 0006811 // ion transport // traceable author statement /// 0006811 // ion transport // inferred from electronic annotation /// 0006820 // anion transport // inferred from electronic annotation /// 0006821 // chloride transport // inferred from direct assay /…	0005737 // cytoplasm // inferred from direct assay /// 0005768 // endosome // inferred from direct assay /// 0005768 // endosome // inferred from electronic annotation /// 0005886 // plasma membrane // traceable author statement /// 0016020 // membrane // inferred from electronic annotation /// 0016021 // integral to membrane // inferred from electronic annotation /// 0016323 // basolateral plasm…	0005253 // anion channel activity // inferred from electronic annotation /// 0005254 // chloride channel activity // inferred from direct assay /// 0005254 // chloride channel activity // inferred from electronic annotation /// 0015106 // bicarbonate transmembrane transporter activity // inferred from sequence or structural similarity /// 0015106 // bicarbonate transmembrane transporter activity …	chr8:92261515-92406946 (+) // 99.4 // q21.3
11723861_a_at	-0.482309	-0.130833	-0.79929	0.130833	0.306832	0.28934	0.0743433	0.0238434	-1.63937	-0.713146	1.63937	down	ATP8A1	10396	0006812 // cation transport // inferred from electronic annotation /// 0015914 // phospholipid transport // inferred from electronic annotation /// 0015917 // aminophospholipid transport // non-traceable author statement /// 0034220 // ion transmembrane transport // traceable author statement /// 0045332 // phospholipid translocation // non-traceable author statement /// 0055085 // transmembrane …	0005783 // endoplasmic reticulum // inferred from direct assay /// 0005783 // endoplasmic reticulum // inferred from electronic annotation /// 0005886 // plasma membrane // traceable author statement /// 0005886 // plasma membrane // inferred from electronic annotation /// 0016020 // membrane // inferred from electronic annotation /// 0016021 // integral to membrane // non-traceable author statem…	0000166 // nucleotide binding // inferred from electronic annotation /// 0000287 // magnesium ion binding // inferred from electronic annotation /// 0004012 // phospholipid-translocating ATPase activity // inferred from electronic annotation /// 0005515 // protein binding // inferred from physical interaction /// 0005524 // ATP binding // non-traceable author statement /// 0005524 // ATP binding …	chr4:42410393-42659122 (-) // 99.5 // p13
11733619_a_at	-0.101305	-0.0495729	0.101446	0.342483	0.0495729	-0.142465	0.696413	0.55166	-1.07153	-0.0996743	1.07153	down	ACVR1C	130399	0002021 // response to dietary excess // inferred from electronic annotation /// 0006468 // protein phosphorylation // inferred by curator /// 0006468 // protein phosphorylation // inferred from electronic annotation /// 0006915 // apoptotic process // inferred from electronic annotation /// 0007178 // transmembrane receptor protein serine/threonine kinase signaling pathway // inferred from elect…	0016020 // membrane // inferred from electronic annotation /// 0016021 // integral to membrane // inferred from electronic annotation /// 0048179 // activin receptor complex // inferred from direct assay	0000166 // nucleotide binding // inferred from electronic annotation /// 0004672 // protein kinase activity // inferred from electronic annotation /// 0004674 // protein serine/threonine kinase activity // inferred from electronic annotation /// 0004675 // transmembrane receptor protein serine/threonine kinase activity // inferred from electronic annotation /// 0004872 // receptor activity // inf…	chr2:158383279-158485517 (-) // 93.9 // q24.1
11716864_s_at	0.0902157	-0.114675	-0.0311728	0.0587711	-0.0349617	0.0311728	0.739109	0.60441	-1.02589	-0.0368713	1.02589	down	NISCH	11188	0006006 // glucose metabolic process // inferred from electronic annotation /// 0006915 // apoptotic process // inferred from electronic annotation /// 0007154 // cell communication // inferred from electronic annotation /// 0008217 // regulation of blood pressure // inferred from electronic annotation /// 0016601 // Rac protein signal transduction // inferred from electronic annotation /// 00300…	0005624 // membrane fraction // inferred from electronic annotation /// 0005737 // cytoplasm // inferred from electronic annotation /// 0005768 // endosome // inferred from electronic annotation /// 0005769 // early endosome // inferred from electronic annotation /// 0005829 // cytosol // inferred from direct assay /// 0005829 // cytosol // inferred from electronic annotation /// 0005886 // plasm…	0004872 // receptor activity // inferred from electronic annotation /// 0005178 // integrin binding // inferred from electronic annotation /// 0008227 // G-protein coupled amine receptor activity // inferred from electronic annotation /// 0035091 // phosphatidylinositol binding // inferred from electronic annotation	chr3:52489518-52527084 (+) // 90.72 // p21.1
200062_PM_s_at	-0.0472431	-0.0241842	-0.0294485	0.0266867	0.0241842	0.034214	0.00884449	0.00122976	-1.0439	-0.061987	1.0439	down	RPL30	6156	0000184 // nuclear-transcribed mRNA catabolic process, nonsense-mediated decay // traceable author statement /// 0006412 // translation // non-traceable author statement /// 0006412 // translation // traceable author statement /// 0006412 // translation // inferred from electronic annotation /// 0006413 // translational initiation // traceable author statement /// 0006414 // translational elongat…	0005622 // intracellular // inferred from electronic annotation /// 0005737 // cytoplasm // inferred from direct assay /// 0005829 // cytosol // traceable author statement /// 0005840 // ribosome // inferred from electronic annotation /// 0022625 // cytosolic large ribosomal subunit // inferred from direct assay /// 0022625 // cytosolic large ribosomal subunit // traceable author statement /// 00…	0003723 // RNA binding // traceable author statement /// 0003735 // structural constituent of ribosome // non-traceable author statement /// 0003735 // structural constituent of ribosome // traceable author statement /// 0003735 // structural constituent of ribosome // inferred from electronic annotation	chr8:99053953-99057752 (-) // 98.74 // q22.2
11740326_x_at	-0.0191414	-0.10939	-0.23233	0.185611	0.203635	0.0191417	0.108341	0.0396207	-1.19451	-0.256416	1.19451	down	SORBS2	8470		0005622 // intracellular // inferred from electronic annotation /// 0005634 // nucleus // non-traceable author statement /// 0005634 // nucleus // traceable author statement /// 0005737 // cytoplasm // inferred from electronic annotation /// 0015629 // actin cytoskeleton // traceable author statement /// 0030018 // Z disc // non-traceable author statement /// 0048471 // perinuclear region of cyto…	0005200 // structural constituent of cytoskeleton // traceable author statement /// 0008093 // cytoskeletal adaptor activity // traceable author statement /// 0008270 // zinc ion binding // inferred from electronic annotation /// 0008307 // structural constituent of muscle // traceable author statement	chr4:186506597-186697679 (-) // 93.63 // q35.1
11725830_a_at	0.179903	0.0542815	-0.153569	-0.109754	0.0108876	-0.0108876	0.715558	0.575003	1.04497	0.0634565	1.04497	up	PLCL2	23228	0006629 // lipid metabolic process // inferred from electronic annotation /// 0007165 // signal transduction // inferred from electronic annotation /// 0035556 // intracellular signal transduction // inferred from electronic annotation	0005622 // intracellular // inferred from electronic annotation /// 0005737 // cytoplasm // inferred from electronic annotation	0004435 // phosphatidylinositol phospholipase C activity // inferred from electronic annotation /// 0004629 // phospholipase C activity // inferred from electronic annotation /// 0004871 // signal transducer activity // inferred from electronic annotation /// 0005509 // calcium ion binding // inferred from electronic annotation /// 0005543 // phospholipid binding // inferred from electronic annot…	chr3:16926451-17132090 (+) // 97.8 // p24.3
11726721_x_at	0.288857	0.232106	0.185871	-0.198114	-0.25278	-0.185871	0.00322886	0.000245131	1.36402	0.447866	1.36402	up	MPG	4350	0006281 // DNA repair // traceable author statement /// 0006281 // DNA repair // inferred from electronic annotation /// 0006284 // base-excision repair // inferred from electronic annotation /// 0006284 // base-excision repair // traceable author statement /// 0006285 // base-excision repair, AP site formation // traceable author statement /// 0006307 // DNA dealkylation involved in DNA repair /…	0005634 // nucleus // inferred from electronic annotation /// 0005654 // nucleoplasm // traceable author statement	0003677 // DNA binding // inferred from electronic annotation /// 0003684 // damaged DNA binding // traceable author statement /// 0003824 // catalytic activity // inferred from electronic annotation /// 0003905 // alkylbase DNA N-glycosylase activity // inferred from electronic annotation /// 0005515 // protein binding // inferred from physical interaction /// 0008725 // DNA-3-methyladenine glyc…	chr16:128168-135837 (+) // 86.65 // p13.3
11743357_a_at	0.0956125	-0.0807467	0.000659466	-0.0406237	-0.000659943	0.031435	0.933523	0.885349	1.00588	0.00845803	1.00588	up	ZBTB40	9923	0006351 // transcription, DNA-dependent // inferred from electronic annotation /// 0006355 // regulation of transcription, DNA-dependent // inferred from electronic annotation /// 0006974 // response to DNA damage stimulus // inferred from direct assay /// 0030282 // bone mineralization // non-traceable author statement	0005622 // intracellular // inferred from electronic annotation /// 0005634 // nucleus // inferred from direct assay /// 0005634 // nucleus // inferred from electronic annotation	0003676 // nucleic acid binding // inferred from electronic annotation /// 0003677 // DNA binding // inferred from electronic annotation /// 0008270 // zinc ion binding // inferred from electronic annotation /// 0046872 // metal ion binding // inferred from electronic annotation	chr1:22778343-22857647 (+) // 92.76 // p36.12
11758895_at	-0.0285673	-0.0764327	-0.0817971	0.0285673	0.131635	0.16651	0.0617802	0.018676	-1.12597	-0.17117	1.12597	down	EIF2S2	8894	0001701 // in utero embryonic development // inferred from electronic annotation /// 0002176 // male germ cell proliferation // inferred from electronic annotation /// 0006412 // translation // traceable author statement /// 0006412 // translation // inferred from electronic annotation /// 0006413 // translational initiation // inferred from direct assay /// 0006413 // translational initiation //…	0005829 // cytosol // traceable author statement /// 0005850 // eukaryotic translation initiation factor 2 complex // traceable author statement	0003723 // RNA binding // traceable author statement /// 0003743 // translation initiation factor activity // inferred from direct assay /// 0003743 // translation initiation factor activity // inferred from electronic annotation /// 0005515 // protein binding // inferred from physical interaction /// 0008135 // translation factor activity, nucleic acid binding // traceable author statement /// 0…	chr20:32676110-32700084 (-) // 79.39 // q11.22
11753852_a_at	0.115689	-0.0297174	0.0117028	-0.14638	-0.0117025	0.230054	0.969317	0.945749	1.00596	0.00856745	1.00596	up	NNAT	4826	0006810 // transport // traceable author statement /// 0007275 // multicellular organismal development // inferred from electronic annotation /// 0007420 // brain development // inferred from electronic annotation /// 0007420 // brain development // traceable author statement /// 0009249 // protein lipoylation // traceable author statement /// 0009749 // response to glucose stimulus // inferred f…	0005737 // cytoplasm // inferred from electronic annotation		chr20:36149733-36151159 (+) // 98.78 // q11.23
11730804_s_at	0.00672293	0.141474	-0.00217628	-0.0638847	0.00217628	-0.0496154	0.307789	0.165394	1.06126	0.0857815	1.06126	up	PRPF38B	55119	0006397 // mRNA processing // inferred from electronic annotation /// 0008380 // RNA splicing // inferred from electronic annotation	0005634 // nucleus // inferred from electronic annotation /// 0005681 // spliceosomal complex // inferred from electronic annotation		chr1:109234913-109244745 (+) // 90.54 // p13.3
11736428_at	0.273274	0.24492	0.312984	-0.24492	-0.258943	-0.261933	0.000680921	1.28754e-05	1.44626	0.532325	1.44626	up	STYX	6815	0006470 // protein dephosphorylation // not recorded /// 0007283 // spermatogenesis // not recorded /// 0016311 // dephosphorylation // inferred from electronic annotation	0005737 // cytoplasm // not recorded	0004721 // phosphoprotein phosphatase activity // inferred from electronic annotation /// 0008138 // protein tyrosine/serine/threonine phosphatase activity // not recorded /// 0016787 // hydrolase activity // inferred from electronic annotation /// 0016791 // phosphatase activity // inferred from electronic annotation	chr14:53196877-53241703 (+) // 92.63 // q22.1
11734349_a_at	0.0677662	0.00882339	0.0276527	-0.0160551	-0.178866	-0.00882339	0.290463	0.152361	1.07375	0.102662	1.07375	up	TRIM11	81559	0009615 // response to virus // inferred from electronic annotation /// 0016567 // protein ubiquitination // inferred from electronic annotation /// 0045892 // negative regulation of transcription, DNA-dependent // inferred from electronic annotation /// 0050768 // negative regulation of neurogenesis // inferred from electronic annotation	0005622 // intracellular // inferred from electronic annotation /// 0005634 // nucleus // inferred from electronic annotation /// 0005737 // cytoplasm // inferred from direct assay /// 0005737 // cytoplasm // inferred from electronic annotation	0004842 // ubiquitin-protein ligase activity // inferred from electronic annotation /// 0008134 // transcription factor binding // inferred from electronic annotation /// 0008270 // zinc ion binding // inferred from electronic annotation /// 0016874 // ligase activity // inferred from electronic annotation /// 0046872 // metal ion binding // inferred from electronic annotation	chr1:228581378-228594541 (-) // 97.53 // q42.13
11744180_a_at	0.284272	0.256456	0.291422	-0.391528	-0.351759	-0.256456	0.00219347	0.000123806	1.52693	0.610631	1.52693	up	TCIRG1	10312	0006810 // transport // inferred from electronic annotation /// 0006811 // ion transport // inferred from electronic annotation /// 0006879 // cellular iron ion homeostasis // traceable author statement /// 0006968 // cellular defense response // traceable author statement /// 0008284 // positive regulation of cell proliferation // traceable author statement /// 0008286 // insulin receptor signal…	0000220 // vacuolar proton-transporting V-type ATPase, V0 domain // inferred from electronic annotation /// 0005739 // mitochondrion // inferred from electronic annotation /// 0005886 // plasma membrane // traceable author statement /// 0005886 // plasma membrane // inferred from electronic annotation /// 0005887 // integral to plasma membrane // traceable author statement /// 0010008 // endosome…	0005215 // transporter activity // traceable author statement /// 0015078 // hydrogen ion transmembrane transporter activity // inferred from electronic annotation	chr11:67806461-67818366 (+) // 95.4 // q13.2
11753358_a_at	0.296059	0.117156	0.330384	-0.200012	-0.117156	-0.176864	0.0209893	0.00426797	1.33103	0.412544	1.33103	up	ACVR1	90	0000082 // G1/S transition of mitotic cell cycle // inferred from mutant phenotype /// 0001569 // patterning of blood vessels // inferred from electronic annotation /// 0001655 // urogenital system development // inferred from electronic annotation /// 0001701 // in utero embryonic development // inferred from electronic annotation /// 0001702 // gastrulation with mouth forming second // inferred…	0005887 // integral to plasma membrane // inferred from direct assay /// 0005887 // integral to plasma membrane // inferred from electronic annotation /// 0016020 // membrane // inferred from electronic annotation /// 0016021 // integral to membrane // inferred from electronic annotation /// 0045177 // apical part of cell // inferred from electronic annotation /// 0048179 // activin receptor comp…	0000166 // nucleotide binding // inferred from electronic annotation /// 0004672 // protein kinase activity // inferred from direct assay /// 0004672 // protein kinase activity // inferred from electronic annotation /// 0004674 // protein serine/threonine kinase activity // inferred from direct assay /// 0004674 // protein serine/threonine kinase activity // inferred from electronic annotation //…	chr2:158622578-158732342 (-) // 99.9 // q24.1
11754542_x_at	0.0631685	0.0702028	-0.0231571	-0.0550461	-0.0519915	0.0231571	0.32185	0.176206	1.04587	0.0646982	1.04587	up	ZNF594	84622	0006351 // transcription, DNA-dependent // inferred from electronic annotation /// 0006355 // regulation of transcription, DNA-dependent // inferred from electronic annotation	0005622 // intracellular // inferred from electronic annotation /// 0005634 // nucleus // inferred from electronic annotation	0003676 // nucleic acid binding // inferred from electronic annotation /// 0003677 // DNA binding // inferred from electronic annotation /// 0008270 // zinc ion binding // inferred from electronic annotation /// 0046872 // metal ion binding // inferred from electronic annotation	chr17:5082830-5095157 (-) // 81.09 // p13.2
11736640_a_at	-0.0942297	0.0926676	0.04984	-0.04984	-0.119579	0.122903	0.843849	0.747497	1.02214	0.0315979	1.02214	up	ESRP2	80004	0006397 // mRNA processing // inferred from electronic annotation /// 0008380 // RNA splicing // inferred from electronic annotation /// 0043484 // regulation of RNA splicing // inferred from direct assay	0005634 // nucleus // inferred from direct assay /// 0005634 // nucleus // inferred from electronic annotation	0000166 // nucleotide binding // inferred from electronic annotation /// 0003676 // nucleic acid binding // inferred from electronic annotation /// 0003723 // RNA binding // inferred from electronic annotation /// 0003729 // mRNA binding // inferred from direct assay	chr16:68262449-68270487 (-) // 95.98 // q22.1
11763281_s_at	0.170475	0.391021	0.542383	-0.334598	-0.170475	-0.367219	0.0269352	0.00602929	1.57869	0.658724	1.57869	up	RPL23AP7 /// RPL23AP82	118433 /// 284942	0006412 // translation // inferred from electronic annotation	0005622 // intracellular // inferred from electronic annotation /// 0005840 // ribosome // inferred from electronic annotation	0000166 // nucleotide binding // inferred from electronic annotation /// 0003735 // structural constituent of ribosome // inferred from electronic annotation	chr2:114367303-114384617 (-) // 33.97 // q13
11737624_a_at	-0.19979	0.0577731	0.0300779	-0.0300775	-0.0785007	0.0931139	0.848948	0.755194	-1.02254	-0.0321582	1.02254	down	GAB2	9846	0007169 // transmembrane receptor protein tyrosine kinase signaling pathway // inferred from direct assay /// 0007229 // integrin-mediated signaling pathway // inferred from electronic annotation /// 0008284 // positive regulation of cell proliferation // inferred from direct assay /// 0016477 // cell migration // inferred from electronic annotation /// 0030316 // osteoclast differentiation // in…	0005622 // intracellular // inferred from electronic annotation /// 0005737 // cytoplasm // inferred from direct assay /// 0005737 // cytoplasm // inferred from electronic annotation /// 0005829 // cytosol // traceable author statement /// 0005886 // plasma membrane // inferred from direct assay /// 0005886 // plasma membrane // inferred from electronic annotation /// 0016020 // membrane // infer…	0005068 // transmembrane receptor protein tyrosine kinase adaptor activity // inferred from direct assay /// 0005070 // SH3/SH2 adaptor activity // inferred from reviewed computational analysis /// 0005515 // protein binding // inferred from physical interaction /// 0005543 // phospholipid binding // inferred from electronic annotation /// 0005547 // phosphatidylinositol-3,4,5-trisphosphate bindi…	chr11:77926341-78128862 (-) // 93.28 // q14.1
11719362_at	-0.285488	-0.174875	-0.251114	0.257944	0.174875	0.178923	0.00482265	0.000483146	-1.35761	-0.441073	1.35761	down	FAM178A	55719				chr10:102672325-102724889 (+) // 98.28 // q24.31
11730351_at	-0.0752864	8.05855e-05	0.00586367	0.0128984	-0.030652	-8.10623e-05	0.726317	0.587564	-1.01197	-0.0171691	1.01197	down	ANKRD52	283373				chr12:56631590-56652175 (-) // 98.74 // q13.3
11718611_at	-0.19312	-0.12154	-0.0101633	0.0101633	0.0706663	0.047462	0.1372	0.0544495	-1.11037	-0.151038	1.11037	down	TP53INP1	94241	0006351 // transcription, DNA-dependent // inferred from electronic annotation /// 0006355 // regulation of transcription, DNA-dependent // inferred from electronic annotation /// 0006914 // autophagy // inferred from electronic annotation /// 0006915 // apoptotic process // inferred from electronic annotation /// 0006917 // induction of apoptosis // inferred from electronic annotation /// 000695…	0005634 // nucleus // inferred from direct assay /// 0005634 // nucleus // inferred from electronic annotation /// 0005737 // cytoplasm // inferred from electronic annotation /// 0005776 // autophagic vacuole // inferred from direct assay /// 0005776 // autophagic vacuole // inferred from electronic annotation /// 0005829 // cytosol // inferred from direct assay /// 0005829 // cytosol // inferred…	0005515 // protein binding // inferred from physical interaction /// 0016209 // antioxidant activity // inferred from sequence or structural similarity /// 0016209 // antioxidant activity // inferred from electronic annotation	chr8:95938199-95961726 (-) // 92.51 // q22.1
11739232_x_at	0.178308	0.138768	0.0504627	-0.0903735	-0.0504632	-0.153946	0.0397456	0.0102778	1.16536	0.220774	1.16536	up	RASSF2	9770	0007049 // cell cycle // inferred from electronic annotation /// 0007165 // signal transduction // inferred from electronic annotation	0005634 // nucleus // inferred from electronic annotation /// 0005737 // cytoplasm // inferred from electronic annotation	0005515 // protein binding // inferred from physical interaction	chr20:4760668-4803050 (-) // 90.41 // p13
AFFX-HSAC07/X00351_3_at	-0.0205488	0.0309773	0.00122929	0.00381756	-0.00122929	-0.0231533	0.706275	0.563447	1.00747	0.010741	1.00747	up	0.00122929	ACTB /// ACTB /// LOC100505829	100505829 /// 60	0006457 // protein folding // traceable author statement /// 0006928 // cellular component movement // traceable author statement /// 0007409 // axonogenesis // inferred from electronic annotation /// 0007411 // axon guidance // traceable author statement /// 0007596 // blood coagulation // traceable author statement /// 0034329 // cell junction assembly // traceable author statement /// 0034332 …	0005625 // soluble fraction // inferred from electronic annotation /// 0005737 // cytoplasm // traceable author statement /// 0005737 // cytoplasm // inferred from electronic annotation /// 0005829 // cytosol // traceable author statement /// 0005829 // cytosol // inferred from electronic annotation /// 0005856 // cytoskeleton // traceable author statement /// 0005856 // cytoskeleton // inferred …	0000166 // nucleotide binding // inferred from electronic annotation /// 0005200 // structural constituent of cytoskeleton // traceable author statement /// 0005200 // structural constituent of cytoskeleton // inferred from electronic annotation /// 0005515 // protein binding // inferred from physical interaction /// 0005524 // ATP binding // inferred from electronic annotation /// 0019894 // kin…
11728692_a_at	0.56433	0.502266	0.400992	-0.400993	-0.412611	-0.468471	0.00150114	6.06628e-05	1.8876	0.916554	1.8876	up	LOC728802 /// PDE4DIP	728802 /// 9659	0043623 // cellular protein complex assembly // inferred from sequence or structural similarity	0005634 // nucleus // inferred from direct assay /// 0005634 // nucleus // inferred from electronic annotation /// 0005737 // cytoplasm // inferred from direct assay /// 0005737 // cytoplasm // inferred from electronic annotation /// 0005794 // Golgi apparatus // inferred from sequence or structural similarity /// 0005794 // Golgi apparatus // inferred from electronic annotation /// 0005813 // ce…	0005515 // protein binding // inferred from physical interaction /// 0019899 // enzyme binding // inferred from sequence or structural similarity	chr1:144890591-144932455 (-) // 99.45 // q21.1
11742877_x_at	-0.00100088	-0.0413103	0.0278273	0.0375891	-0.0370908	0.00100136	0.920844	0.865196	-1.0037	-0.0053278	1.0037	down	SGSM3	27352	0007049 // cell cycle // inferred from electronic annotation /// 0007050 // cell cycle arrest // inferred from electronic annotation /// 0032313 // regulation of Rab GTPase activity // inferred from electronic annotation /// 0032483 // regulation of Rab protein signal transduction // inferred from expression pattern /// 0032486 // Rap protein signal transduction // inferred from expression patter…	0005622 // intracellular // inferred from electronic annotation /// 0005737 // cytoplasm // inferred from electronic annotation /// 0005921 // gap junction // inferred from electronic annotation	0005097 // Rab GTPase activator activity // inferred from electronic annotation /// 0005515 // protein binding // inferred from physical interaction /// 0017137 // Rab GTPase binding // inferred from direct assay	chr22:40766588-40806289 (+) // 95.74 // q13.1
11747293_a_at	0.0179448	-0.00726271	0.00726247	-0.0567269	0.0727406	-0.0757687	0.745224	0.612549	1.01811	0.0258999	1.01811	up	CD1B	910	0006955 // immune response // inferred from electronic annotation /// 0019882 // antigen processing and presentation // inferred from electronic annotation	0005764 // lysosome // inferred from electronic annotation /// 0005765 // lysosomal membrane // inferred from electronic annotation /// 0005768 // endosome // inferred from electronic annotation /// 0005886 // plasma membrane // inferred from electronic annotation /// 0005886 // plasma membrane // traceable author statement /// 0010008 // endosome membrane // inferred from electronic annotation /…	0005515 // protein binding // inferred from physical interaction	chr1:158300085-158301828 (-) // 95.85 // q23.1
11742860_a_at	0.0715957	-0.125934	0.283578	-0.00424171	-0.0764418	0.00424171	0.607554	0.447065	1.07318	0.101894	1.07318	up	GPR116	221395	0007165 // signal transduction // inferred from electronic annotation /// 0007166 // cell surface receptor signaling pathway // inferred from electronic annotation /// 0007186 // G-protein coupled receptor signaling pathway // traceable author statement /// 0007186 // G-protein coupled receptor signaling pathway // inferred from electronic annotation /// 0007218 // neuropeptide signaling pathway …	0005886 // plasma membrane // inferred from electronic annotation /// 0016020 // membrane // inferred from electronic annotation /// 0016021 // integral to membrane // inferred from electronic annotation /// 0016021 // integral to membrane // traceable author statement	0004871 // signal transducer activity // inferred from electronic annotation /// 0004872 // receptor activity // inferred from electronic annotation /// 0004888 // transmembrane signaling receptor activity // inferred from electronic annotation /// 0004930 // G-protein coupled receptor activity // inferred from electronic annotation /// 0004930 // G-protein coupled receptor activity // traceable …	chr6:46820246-46889742 (-) // 98.41 // p12.3
11745498_a_at	-0.00728083	-0.0254841	0.00728035	0.0117636	0.0123868	-0.101827	0.79482	0.679624	1.01213	0.0173974	1.01213	up	IRF3	3661	0000122 // negative regulation of transcription from RNA polymerase II promoter // inferred from electronic annotation /// 0002756 // MyD88-independent toll-like receptor signaling pathway // traceable author statement /// 0006351 // transcription, DNA-dependent // inferred from electronic annotation /// 0006355 // regulation of transcription, DNA-dependent // inferred from electronic annotation …	0005634 // nucleus // inferred from direct assay /// 0005634 // nucleus // inferred from electronic annotation /// 0005654 // nucleoplasm // traceable author statement /// 0005737 // cytoplasm // inferred from direct assay /// 0005737 // cytoplasm // inferred from electronic annotation /// 0005829 // cytosol // traceable author statement /// 0005886 // plasma membrane // traceable author statemen…	0000975 // regulatory region DNA binding // inferred from electronic annotation /// 0003677 // DNA binding // non-traceable author statement /// 0003677 // DNA binding // inferred from electronic annotation /// 0003700 // sequence-specific DNA binding transcription factor activity // inferred from electronic annotation /// 0003712 // transcription cofactor activity // traceable author statement /…	chr19:50162904-50169116 (-) // 94.82 // q13.33
11726129_at	0.0310612	-0.135457	-0.363604	-0.0310612	0.499147	0.263022	0.222726	0.104935	-1.31924	-0.399703	1.31924	down	HBZ	3050	0000122 // negative regulation of transcription from RNA polymerase II promoter // inferred from electronic annotation /// 0006810 // transport // inferred from electronic annotation /// 0015671 // oxygen transport // traceable author statement /// 0015671 // oxygen transport // inferred from electronic annotation /// 0043249 // erythrocyte maturation // inferred from electronic annotation	0005833 // hemoglobin complex // inferred from electronic annotation /// 0005833 // hemoglobin complex // traceable author statement	0005344 // oxygen transporter activity // inferred from electronic annotation /// 0005344 // oxygen transporter activity // traceable author statement /// 0005506 // iron ion binding // inferred from electronic annotation /// 0019825 // oxygen binding // inferred from electronic annotation /// 0020037 // heme binding // inferred from electronic annotation /// 0046872 // metal ion binding // infer…	chr16:202683-204505 (+) // 92.67 // p13.3
11730174_at	-0.0566645	0.184078	0.0529768	-0.0236614	0.0236611	-0.293777	0.423877	0.261208	1.11578	0.158056	1.11578	up	C4orf3	401152		0016020 // membrane // inferred from electronic annotation /// 0016021 // integral to membrane // inferred from electronic annotation		chr4:120217574-120222256 (-) // 56.88 // q26
11715132_x_at	-0.122384	0.0541289	-0.0609391	0.00798726	-0.00798726	0.032892	0.532322	0.366316	-1.03816	-0.0540286	1.03816	down	HIST1H2BH	8345	0006334 // nucleosome assembly // non-traceable author statement /// 0006334 // nucleosome assembly // inferred from electronic annotation	0000786 // nucleosome // non-traceable author statement /// 0000786 // nucleosome // inferred from electronic annotation /// 0005634 // nucleus // inferred from electronic annotation /// 0005694 // chromosome // inferred from electronic annotation	0003677 // DNA binding // non-traceable author statement /// 0003677 // DNA binding // inferred from electronic annotation	chr6:26251878-26252303 (+) // 100.0 // p22.2
11736997_a_at	-0.0373015	0.0312381	0.0412006	0.00648785	-0.0678081	-0.00648785	0.531879	0.365774	1.02407	0.034315	1.02407	up	MOSPD3	64598	0007507 // heart development // inferred from electronic annotation	0016020 // membrane // inferred from electronic annotation /// 0016021 // integral to membrane // inferred from electronic annotation	0005198 // structural molecule activity // inferred from electronic annotation	chr7:100209724-100212998 (+) // 95.52 // q22.1
11721214_a_at	-0.17432	-0.0611401	0.0177107	0.0333433	0.0067482	-0.0067482	0.371046	0.215657	-1.05973	-0.0836976	1.05973	down	TMEM106B	54664		0005764 // lysosome // inferred from electronic annotation /// 0005765 // lysosomal membrane // inferred from electronic annotation /// 0005768 // endosome // inferred from electronic annotation /// 0016020 // membrane // inferred from electronic annotation /// 0016021 // integral to membrane // inferred from electronic annotation /// 0031902 // late endosome membrane // inferred from electronic …		chr7:12250847-12276890 (+) // 91.68 // p21.3
11739333_at	0.0100911	-0.0100911	-0.172313	0.0613708	-0.0317009	0.0484447	0.429416	0.266239	-1.05957	-0.0834758	1.05957	down	SSTR2	6752	0006937 // regulation of muscle contraction // inferred from electronic annotation /// 0007165 // signal transduction // inferred from electronic annotation /// 0007186 // G-protein coupled receptor signaling pathway // inferred from electronic annotation /// 0007187 // G-protein coupled receptor signaling pathway, coupled to cyclic nucleotide second messenger // traceable author statement /// 00…	0005624 // membrane fraction // inferred from electronic annotation /// 0005737 // cytoplasm // inferred from electronic annotation /// 0005886 // plasma membrane // traceable author statement /// 0005886 // plasma membrane // inferred from electronic annotation /// 0005887 // integral to plasma membrane // traceable author statement /// 0016020 // membrane // inferred from electronic annotation …	0004871 // signal transducer activity // inferred from electronic annotation /// 0004872 // receptor activity // inferred from electronic annotation /// 0004930 // G-protein coupled receptor activity // inferred from electronic annotation /// 0004994 // somatostatin receptor activity // inferred from electronic annotation /// 0004994 // somatostatin receptor activity // traceable author statement…	chr17:71161115-71168060 (+) // 82.39 // q25.1
11741018_a_at	-0.0779934	-0.182156	-0.126219	0.0779934	0.145577	0.108381	0.0149396	0.00262196	-1.18053	-0.23944	1.18053	down	FAM65A	79567		0005737 // cytoplasm // inferred from sequence or structural similarity /// 0005737 // cytoplasm // inferred from electronic annotation		chr16:67562716-67580688 (+) // 98.59 // q22.1
11743968_a_at	0.061655	-0.0241604	-0.0118771	0.00318623	0.0030098	-0.00301075	0.875483	0.794595	1.0052	0.00747748	1.0052	up	CYBA	1535	0001938 // positive regulation of endothelial cell proliferation // inferred from electronic annotation /// 0002474 // antigen processing and presentation of peptide antigen via MHC class I // traceable author statement /// 0002479 // antigen processing and presentation of exogenous peptide antigen via MHC class I, TAP-dependent // traceable author statement /// 0003106 // negative regulation of …	0005737 // cytoplasm // inferred from electronic annotation /// 0005739 // mitochondrion // inferred from electronic annotation /// 0005794 // Golgi apparatus // inferred from electronic annotation /// 0016020 // membrane // inferred from electronic annotation /// 0016324 // apical plasma membrane // inferred from electronic annotation /// 0030141 // secretory granule // traceable author statemen…	0005515 // protein binding // inferred from physical interaction /// 0009055 // electron carrier activity // inferred from direct assay /// 0009055 // electron carrier activity // traceable author statement /// 0016175 // superoxide-generating NADPH oxidase activity // inferred from mutant phenotype /// 0016175 // superoxide-generating NADPH oxidase activity // inferred from electronic annotation…	chr16:88709696-88717560 (-) // 63.95 // q24.3
11736749_a_at	-0.0427485	0.0855174	-0.129963	0.0427485	-0.196024	0.173047	0.872021	0.789418	-1.02502	-0.0356553	1.02502	down	SLC22A9	114571	0006810 // transport // inferred from electronic annotation /// 0055085 // transmembrane transport // inferred from electronic annotation	0016020 // membrane // inferred from electronic annotation /// 0016021 // integral to membrane // inferred from electronic annotation		chr11:63137154-63177710 (+) // 86.42 // q12.3
11746592_s_at	-0.535056	-0.263854	-0.0883246	0.448572	0.15401	0.0883246	0.102787	0.0369017	-1.43998	-0.526047	1.43998	down	LOC100288332 /// LOC100506193 /// LOC642778 /// LOC642799 /// NPIP /// NPIPL3 /// PKD1P1	100288332 /// 100506193 /// 23117 /// 339044 /// 642778 /// 642799 /// 9284	0001502 // cartilage condensation // inferred from electronic annotation /// 0001568 // blood vessel development // inferred from electronic annotation /// 0001701 // in utero embryonic development // inferred from electronic annotation /// 0001701 // in utero embryonic development // inferred from sequence or structural similarity /// 0001822 // kidney development // inferred from electronic ann…	0002133 // polycystin complex // inferred from electronic annotation /// 0002133 // polycystin complex // inferred from sequence or structural similarity /// 0005634 // nucleus // inferred from electronic annotation /// 0005634 // nucleus // inferred from sequence or structural similarity /// 0005643 // nuclear pore // inferred from electronic annotation /// 0005737 // cytoplasm // inferred from …	0005261 // cation channel activity // inferred from electronic annotation /// 0005261 // cation channel activity // inferred from sequence or structural similarity /// 0005515 // protein binding // inferred from physical interaction /// 0019901 // protein kinase binding // inferred from physical interaction /// 0019904 // protein domain specific binding // inferred from physical interaction /// 0…	chr16:70011367-70023987 (-) // 99.26 // q22.1
11729410_a_at	-0.101449	-0.0453472	-0.462982	0.206936	0.0453472	0.29751	0.150558	0.0617761	-1.30724	-0.386524	1.30724	down	ZNF415	55786	0006351 // transcription, DNA-dependent // inferred from electronic annotation /// 0006355 // regulation of transcription, DNA-dependent // inferred from electronic annotation	0005622 // intracellular // inferred from electronic annotation /// 0005634 // nucleus // inferred from electronic annotation /// 0005730 // nucleolus // inferred from direct assay /// 0005737 // cytoplasm // inferred from direct assay /// 0005737 // cytoplasm // inferred from electronic annotation /// 0015630 // microtubule cytoskeleton // inferred from direct assay	0003676 // nucleic acid binding // inferred from electronic annotation /// 0003677 // DNA binding // inferred from electronic annotation /// 0008270 // zinc ion binding // inferred from electronic annotation /// 0046872 // metal ion binding // inferred from electronic annotation	chr19:53611132-53636145 (-) // 91.41 // q13.42
11721848_at	-0.153558	0.0360498	-0.129574	0.0860629	-0.0360498	0.0683341	0.301224	0.160195	-1.0881	-0.12181	1.0881	down	REEP2	51308		0016020 // membrane // inferred from electronic annotation /// 0016021 // integral to membrane // inferred from electronic annotation	0004872 // receptor activity // inferred from electronic annotation	chr5:137774732-137782658 (+) // 92.04 // q31.2
11761778_a_at	-0.108914	-0.126608	-0.113708	0.231514	0.108914	0.132943	0.0121039	0.00193265	-1.20932	-0.2742	1.20932	down	WDR45	11152	0000045 // autophagic vacuole assembly // not recorded	0005737 // cytoplasm // not recorded	0005083 // small GTPase regulator activity // inferred from electronic annotation /// 0032266 // phosphatidylinositol-3-phosphate binding // not recorded /// 0080025 // phosphatidylinositol-3,5-bisphosphate binding // not recorded	chrX:48934732-48937553 (-) // 74.25 // p11.23
11731939_a_at	0.13292	0.00638986	0.143562	-0.182664	-0.00638986	-0.15611	0.111059	0.040943	1.15616	0.209345	1.15616	up	UCP3	7352	0000303 // response to superoxide // inferred from electronic annotation /// 0001666 // response to hypoxia // inferred from electronic annotation /// 0006629 // lipid metabolic process // traceable author statement /// 0006631 // fatty acid metabolic process // inferred from electronic annotation /// 0006810 // transport // inferred from electronic annotation /// 0006839 // mitochondrial transpo…	0005739 // mitochondrion // traceable author statement /// 0005739 // mitochondrion // inferred from electronic annotation /// 0005743 // mitochondrial inner membrane // traceable author statement /// 0005743 // mitochondrial inner membrane // inferred from electronic annotation /// 0016020 // membrane // inferred from electronic annotation /// 0016021 // integral to membrane // inferred from ele…	0005215 // transporter activity // traceable author statement /// 0017077 // oxidative phosphorylation uncoupler activity // inferred from electronic annotation	chr11:73711326-73720563 (-) // 92.25 // q13.4
11743553_a_at	0.13394	0.173992	0.195934	-0.148749	-0.13394	-0.14895	0.00168696	7.76626e-05	1.24129	0.311835	1.24129	up	KIN	22944	0006260 // DNA replication // inferred from direct assay /// 0006260 // DNA replication // inferred from electronic annotation /// 0006281 // DNA repair // inferred from electronic annotation /// 0006310 // DNA recombination // inferred from electronic annotation /// 0006397 // mRNA processing // traceable author statement /// 0006397 // mRNA processing // inferred from electronic annotation /// …	0005622 // intracellular // inferred from electronic annotation /// 0005634 // nucleus // traceable author statement /// 0005634 // nucleus // inferred from electronic annotation /// 0005737 // cytoplasm // inferred from electronic annotation /// 0016363 // nuclear matrix // inferred from direct assay	0003677 // DNA binding // traceable author statement /// 0003677 // DNA binding // inferred from electronic annotation /// 0003690 // double-stranded DNA binding // inferred from sequence or structural similarity /// 0003690 // double-stranded DNA binding // inferred from electronic annotation /// 0003723 // RNA binding // inferred from direct assay /// 0003723 // RNA binding // inferred from ele…	chr10:7797191-7829935 (-) // 76.66 // p14
11758285_s_at	-0.0467787	-0.0655251	-0.055706	0.0923042	0.0467787	0.141405	0.0262208	0.005818	-1.10918	-0.149499	1.10918	down	GTF3C1	2975	0006351 // transcription, DNA-dependent // inferred by curator /// 0006351 // transcription, DNA-dependent // inferred from electronic annotation /// 0006383 // transcription from RNA polymerase III promoter // inferred by curator /// 0006383 // transcription from RNA polymerase III promoter // traceable author statement /// 0009303 // rRNA transcription // traceable author statement /// 0009304 …	0000127 // transcription factor TFIIIC complex // inferred from direct assay /// 0000127 // transcription factor TFIIIC complex // inferred from electronic annotation /// 0005634 // nucleus // inferred from electronic annotation /// 0005654 // nucleoplasm // traceable author statement /// 0030529 // ribonucleoprotein complex // inferred from electronic annotation	0003677 // DNA binding // inferred by curator /// 0003677 // DNA binding // inferred from electronic annotation /// 0005515 // protein binding // inferred from physical interaction	chr16:27471776-27472301 (-) // 89.74 // p12.1
11757037_s_at	0.0455694	0.177116	0.152949	-0.0455685	-0.156267	-0.163475	0.0427595	0.0113094	1.18672	0.246982	1.18672	up	H3F3A /// H3F3B	3020 /// 3021	0006334 // nucleosome assembly // inferred from electronic annotation /// 0007596 // blood coagulation // traceable author statement	0000786 // nucleosome // inferred from electronic annotation /// 0005576 // extracellular region // traceable author statement /// 0005634 // nucleus // inferred from direct assay /// 0005634 // nucleus // inferred from electronic annotation /// 0005654 // nucleoplasm // traceable author statement /// 0005694 // chromosome // inferred from electronic annotation	0003677 // DNA binding // inferred from electronic annotation	chr17:73774152-73775853 (-) // 99.82 // q25.1
11724973_a_at	0.0984328	-0.0182188	0.00322485	0.00865102	-0.0985851	-0.00322485	0.465456	0.298992	1.04165	0.0588659	1.04165	up	MYRIP	25924	0006886 // intracellular protein transport // inferred from electronic annotation /// 0032024 // positive regulation of insulin secretion // inferred from sequence or structural similarity	0001750 // photoreceptor outer segment // inferred from electronic annotation /// 0005622 // intracellular // inferred from electronic annotation /// 0005737 // cytoplasm // inferred from electronic annotation /// 0015629 // actin cytoskeleton // inferred from electronic annotation /// 0030133 // transport vesicle // inferred from electronic annotation /// 0031045 // dense core granule // inferre…	0003779 // actin binding // inferred from electronic annotation /// 0005515 // protein binding // inferred from physical interaction /// 0008270 // zinc ion binding // non-traceable author statement /// 0017022 // myosin binding // inferred from electronic annotation /// 0017137 // Rab GTPase binding // inferred from electronic annotation /// 0046872 // metal ion binding // inferred from electron…	chr3:39850913-40301812 (+) // 93.45 // p22.1
11730180_s_at	-0.246635	-0.161063	-0.302412	0.222219	0.247084	0.161063	0.0064688	0.000765333	-1.36304	-0.446825	1.36304	down	KDSR	2531	0006665 // sphingolipid metabolic process // traceable author statement /// 0006665 // sphingolipid metabolic process // inferred from electronic annotation /// 0006666 // 3-keto-sphinganine metabolic process // inferred from direct assay /// 0008152 // metabolic process // inferred from electronic annotation /// 0030148 // sphingolipid biosynthetic process // traceable author statement /// 00301…	0005615 // extracellular space // traceable author statement /// 0005783 // endoplasmic reticulum // inferred from direct assay /// 0005783 // endoplasmic reticulum // inferred from electronic annotation /// 0005789 // endoplasmic reticulum membrane // traceable author statement /// 0005789 // endoplasmic reticulum membrane // inferred from electronic annotation /// 0016020 // membrane // inferre…	0000166 // nucleotide binding // inferred from electronic annotation /// 0016491 // oxidoreductase activity // inferred from electronic annotation /// 0047560 // 3-dehydrosphinganine reductase activity // inferred from direct assay /// 0047560 // 3-dehydrosphinganine reductase activity // inferred from electronic annotation	chr18:60994807-61034516 (-) // 81.73 // q21.33
11724053_a_at	-0.135149	-0.164386	-0.0543861	0.116933	0.126154	0.0543861	0.025231	0.00552534	-1.16242	-0.217132	1.16242	down	FGFRL1	53834	0001501 // skeletal system development // inferred from electronic annotation /// 0001558 // regulation of cell growth // non-traceable author statement /// 0003179 // heart valve morphogenesis // inferred from electronic annotation /// 0008285 // negative regulation of cell proliferation // inferred from electronic annotation /// 0008543 // fibroblast growth factor receptor signaling pathway // …	0005886 // plasma membrane // inferred from direct assay /// 0005886 // plasma membrane // inferred from electronic annotation /// 0016020 // membrane // inferred from electronic annotation /// 0016021 // integral to membrane // inferred from electronic annotation	0004872 // receptor activity // inferred from electronic annotation /// 0005007 // fibroblast growth factor-activated receptor activity // inferred from direct assay /// 0005007 // fibroblast growth factor-activated receptor activity // inferred from electronic annotation /// 0008201 // heparin binding // inferred from direct assay /// 0017134 // fibroblast growth factor binding // inferred from …	chr4:1006240-1020686 (+) // 75.49 // p16.3
11741696_x_at	-0.043725	-0.119779	-0.0753698	0.043725	0.154018	0.154373	0.0392663	0.0101117	-1.14631	-0.196997	1.14631	down	NSUN5P1	155400				chr7:75039645-75046065 (+) // 100.0 // q11.23 /// chr7:72418837-72425261 (-) // 98.71 // q11.23 /// chr7:72717226-72722792 (-) // 96.34 // q11.23
11751535_s_at	0.0883176	-0.00851131	-0.187778	-0.0850465	0.00851154	0.0260565	0.903887	0.83812	-1.01337	-0.0191646	1.01337	down	CA3	761	0006730 // one-carbon metabolic process // inferred from electronic annotation /// 0006979 // response to oxidative stress // inferred from electronic annotation	0005737 // cytoplasm // inferred from electronic annotation	0004089 // carbonate dehydratase activity // inferred from electronic annotation /// 0004089 // carbonate dehydratase activity // traceable author statement /// 0008270 // zinc ion binding // inferred from electronic annotation /// 0016151 // nickel cation binding // inferred from electronic annotation /// 0016829 // lyase activity // inferred from electronic annotation /// 0046872 // metal ion b…	chr8:86351086-86360746 (+) // 99.91 // q21.2
11716209_a_at	0.26386	0.194854	0.235616	-0.194854	-0.217097	-0.23105	0.00120254	3.9196e-05	1.36205	0.445777	1.36205	up	VPS28	51160	0006810 // transport // inferred from electronic annotation /// 0015031 // protein transport // inferred from electronic annotation /// 0016032 // viral reproduction // traceable author statement /// 0016044 // cellular membrane organization // traceable author statement /// 0016197 // endosomal transport // traceable author statement /// 0031397 // negative regulation of protein ubiquitination /…	0005737 // cytoplasm // inferred from direct assay /// 0005768 // endosome // inferred from direct assay /// 0005768 // endosome // inferred from electronic annotation /// 0005829 // cytosol // inferred from direct assay /// 0005886 // plasma membrane // inferred from electronic annotation /// 0010008 // endosome membrane // traceable author statement /// 0016020 // membrane // inferred from elec…	0005515 // protein binding // inferred from physical interaction	chr8:145649000-145653895 (-) // 69.48 // q24.3
11734043_at	-0.284776	-0.0467353	-0.0896409	0.0467351	0.102611	0.185396	0.107877	0.0393898	-1.19083	-0.251965	1.19083	down	KIAA0408 /// SOGA3	387104 /// 9729		0016020 // membrane // inferred from electronic annotation /// 0016021 // integral to membrane // inferred from electronic annotation	0005515 // protein binding // inferred from physical interaction	chr6:127761734-127840792 (-) // 96.66 // q22.33
11762934_at	-0.0458605	-0.0417044	0.0430019	0.0417044	0.0501685	-0.124573	0.973714	0.953578	-1.00274	-0.00395413	1.00274	down	CD300LG	146894		0005768 // endosome // inferred from electronic annotation /// 0005886 // plasma membrane // inferred from electronic annotation /// 0016020 // membrane // inferred from electronic annotation /// 0016021 // integral to membrane // inferred from electronic annotation /// 0016323 // basolateral plasma membrane // inferred from electronic annotation /// 0016324 // apical plasma membrane // inferred …	0004872 // receptor activity // inferred from electronic annotation	chr17:41924523-41935518 (+) // 75.83 // q21.31
11737888_a_at	0.376598	-0.0610194	0.0610194	0.0961399	-0.0912857	-0.0697002	0.528304	0.362214	1.10738	0.147148	1.10738	up	HRH4	59340	0006954 // inflammatory response // inferred from electronic annotation /// 0007165 // signal transduction // inferred from electronic annotation /// 0007186 // G-protein coupled receptor signaling pathway // inferred from electronic annotation	0005624 // membrane fraction // inferred from electronic annotation /// 0005886 // plasma membrane // traceable author statement /// 0005886 // plasma membrane // inferred from electronic annotation /// 0016020 // membrane // inferred from electronic annotation /// 0016021 // integral to membrane // non-traceable author statement /// 0016021 // integral to membrane // inferred from electronic ann…	0004871 // signal transducer activity // inferred from electronic annotation /// 0004872 // receptor activity // inferred from electronic annotation /// 0004930 // G-protein coupled receptor activity // inferred from electronic annotation /// 0004969 // histamine receptor activity // non-traceable author statement /// 0004969 // histamine receptor activity // inferred from electronic annotation	chr18:22040592-22059920 (+) // 59.72 // q11.2
11718294_s_at	-0.423677	-0.386082	-0.418488	0.386082	0.415239	0.406923	0.00025723	6.27639e-07	-1.75584	-0.812164	1.75584	down	NME1-NME2 /// NME2	4831 /// 654364	0002762 // negative regulation of myeloid leukocyte differentiation // inferred from electronic annotation /// 0006165 // nucleoside diphosphate phosphorylation // inferred from direct assay /// 0006165 // nucleoside diphosphate phosphorylation // inferred from electronic annotation /// 0006183 // GTP biosynthetic process // inferred from electronic annotation /// 0006228 // UTP biosynthetic proc…	0001726 // ruffle // inferred from direct assay /// 0005625 // soluble fraction // inferred from electronic annotation /// 0005634 // nucleus // non-traceable author statement /// 0005634 // nucleus // inferred from electronic annotation /// 0005634 // nucleus // traceable author statement /// 0005737 // cytoplasm // inferred from direct assay /// 0005737 // cytoplasm // inferred from electronic …	0000166 // nucleotide binding // inferred from electronic annotation /// 0000287 // magnesium ion binding // inferred from direct assay /// 0003677 // DNA binding // inferred from electronic annotation /// 0003700 // sequence-specific DNA binding transcription factor activity // traceable author statement /// 0004536 // deoxyribonuclease activity // inferred from direct assay /// 0004550 // nucle…	chr17:49230925-49249104 (+) // 72.48 // q21.33
11743861_a_at	-0.420221	-0.404189	-0.411505	0.404189	0.502135	0.45315	0.000520525	7.16585e-06	-1.8215	-0.86513	1.8215	down	NIPSNAP3A	25934		0005737 // cytoplasm // inferred from electronic annotation /// 0005829 // cytosol // inferred from electronic annotation	0005515 // protein binding // inferred from physical interaction	chr9:107509870-107522400 (+) // 96.54 // q31.1
11715832_s_at	0.0424652	0.037982	-0.0120468	-0.031064	0.0120468	-0.0938768	0.304396	0.162714	1.04278	0.0604314	1.04278	up	SURF4	6836	0007030 // Golgi organization // inferred from mutant phenotype /// 0010638 // positive regulation of organelle organization // inferred from mutant phenotype /// 0032527 // protein exit from endoplasmic reticulum // inferred from mutant phenotype /// 0034498 // early endosome to Golgi transport // inferred from mutant phenotype	0000139 // Golgi membrane // inferred from electronic annotation /// 0005783 // endoplasmic reticulum // inferred from electronic annotation /// 0005789 // endoplasmic reticulum membrane // inferred from electronic annotation /// 0005793 // endoplasmic reticulum-Golgi intermediate compartment // inferred from direct assay /// 0005794 // Golgi apparatus // inferred from electronic annotation /// 0…	0005515 // protein binding // inferred from physical interaction	chr9:136228335-136243000 (-) // 95.94 // q34.2
11730835_a_at	-0.00271606	0.0807018	0.0277729	-0.060463	-0.0181408	0.00271606	0.244268	0.119398	1.04286	0.0605488	1.04286	up	MTX2	10651	0006626 // protein targeting to mitochondrion // inferred from electronic annotation /// 0006626 // protein targeting to mitochondrion // traceable author statement /// 0006810 // transport // inferred from electronic annotation /// 0006839 // mitochondrial transport // traceable author statement /// 0015031 // protein transport // inferred from electronic annotation /// 0044267 // cellular prote…	0005739 // mitochondrion // inferred from electronic annotation /// 0005741 // mitochondrial outer membrane // inferred from electronic annotation /// 0005741 // mitochondrial outer membrane // traceable author statement /// 0016020 // membrane // inferred from electronic annotation		chr2:177134143-177202751 (+) // 97.76 // q31.1
11723092_at	-0.11694	-0.0512519	-0.0169683	0.206781	0.0169687	0.156047	0.113352	0.0420342	-1.13944	-0.188319	1.13944	down	FNIP2	57600	0001932 // regulation of protein phosphorylation // inferred from direct assay /// 0006468 // protein phosphorylation // inferred from direct assay /// 0006974 // response to DNA damage stimulus // inferred from electronic annotation /// 0008630 // DNA damage response, signal transduction resulting in induction of apoptosis // inferred from sequence or structural similarity	0005634 // nucleus // inferred from direct assay /// 0005730 // nucleolus // inferred from direct assay /// 0005737 // cytoplasm // inferred from direct assay /// 0005737 // cytoplasm // inferred from electronic annotation /// 0005886 // plasma membrane // inferred from direct assay	0005515 // protein binding // inferred from physical interaction	chr4:159690165-159828201 (+) // 97.59 // q32.1
11725177_at	-0.074419	0.0456519	0.0562153	0.0353379	-0.0353379	-0.107819	0.64207	0.486279	1.03175	0.0450891	1.03175	up	KCTD11	147040	0007049 // cell cycle // inferred from electronic annotation /// 0007275 // multicellular organismal development // inferred from electronic annotation /// 0007399 // nervous system development // inferred from electronic annotation /// 0030154 // cell differentiation // inferred from electronic annotation /// 0040008 // regulation of growth // inferred from electronic annotation /// 0042127 // r…	0005737 // cytoplasm // inferred from electronic annotation		chr17:7255207-7258263 (+) // 94.51 // p13.1
11762768_at	0.00146818	-0.00699019	0.0408945	0.122003	-0.00146818	-0.00146818	0.701917	0.558123	-1.01953	-0.0278979	1.01953	down	ZNF215	7762	0006351 // transcription, DNA-dependent // inferred from electronic annotation /// 0006355 // regulation of transcription, DNA-dependent // non-traceable author statement /// 0006355 // regulation of transcription, DNA-dependent // inferred from electronic annotation /// 0016032 // viral reproduction // inferred from electronic annotation	0005622 // intracellular // inferred from electronic annotation /// 0005634 // nucleus // inferred from electronic annotation /// 0005634 // nucleus // non-traceable author statement	0003676 // nucleic acid binding // inferred from electronic annotation /// 0003677 // DNA binding // inferred from electronic annotation /// 0003700 // sequence-specific DNA binding transcription factor activity // inferred from electronic annotation /// 0003700 // sequence-specific DNA binding transcription factor activity // non-traceable author statement /// 0008270 // zinc ion binding // non-…	chr11:6953416-6977013 (+) // 62.35 // p15.4
11743965_s_at	-0.000277996	-0.0365028	-0.0792699	0.0781298	0.0108385	0.000277996	0.230159	0.10984	-1.04858	-0.0684324	1.04858	down	CERCAM /// LOC100506065	100506065 /// 51148	0006928 // cellular component movement // traceable author statement /// 0007155 // cell adhesion // inferred from direct assay /// 0007155 // cell adhesion // inferred from electronic annotation /// 0007159 // leukocyte cell-cell adhesion // traceable author statement /// 0009103 // lipopolysaccharide biosynthetic process // inferred from electronic annotation	0005783 // endoplasmic reticulum // inferred from electronic annotation /// 0005788 // endoplasmic reticulum lumen // inferred from electronic annotation /// 0005886 // plasma membrane // non-traceable author statement		chr9:131182759-131199628 (+) // 92.03 // q34.11
11741324_s_at	-0.0847964	0.0201423	0.120084	-0.00764346	0.00764346	-0.0710757	0.690814	0.545197	1.02966	0.0421683	1.02966	up	TRIM51 /// TRIM51EP /// TRIM51GP /// TRIM51HP	120824 /// 399940 /// 440041 /// 84767		0005622 // intracellular // inferred from electronic annotation	0008270 // zinc ion binding // inferred from electronic annotation /// 0046872 // metal ion binding // inferred from electronic annotation	chr11:55650772-55659282 (+) // 98.6 // q11 /// chr11:89586007-89596233 (+) // 95.63 // q14.3 /// chr11:89714612-89724840 (-) // 95.51 // q14.3 /// chr11:55059364-55067885 (-) // 95.33 // q11
11735795_at	-0.12817	0.0443873	0.0216608	0.111014	-0.119989	-0.0216608	0.947251	0.908839	-1.0073	-0.0104952	1.0073	down	GPSM1	26086	0007165 // signal transduction // inferred from electronic annotation /// 0007275 // multicellular organismal development // inferred from electronic annotation /// 0007399 // nervous system development // inferred from electronic annotation /// 0008277 // regulation of G-protein coupled receptor protein signaling pathway // inferred from electronic annotation /// 0030154 // cell differentiation …	0000139 // Golgi membrane // inferred from electronic annotation /// 0005634 // nucleus // inferred from direct assay /// 0005730 // nucleolus // inferred from direct assay /// 0005737 // cytoplasm // inferred from electronic annotation /// 0005783 // endoplasmic reticulum // inferred from electronic annotation /// 0005789 // endoplasmic reticulum membrane // inferred from electronic annotation /…	0001965 // G-protein alpha-subunit binding // inferred from electronic annotation /// 0005092 // GDP-dissociation inhibitor activity // inferred from electronic annotation /// 0030695 // GTPase regulator activity // inferred from electronic annotation	chr9:139221931-139236801 (+) // 86.97 // q34.3
11741004_a_at	-0.0886121	-0.089828	-0.0886121	0.0886121	0.147702	0.233355	0.0210078	0.00427443	-1.18556	-0.245573	1.18556	down	ALS2CR8	79800	0006355 // regulation of transcription, DNA-dependent // inferred from electronic annotation	0005634 // nucleus // inferred from electronic annotation /// 0005654 // nucleoplasm // inferred from electronic annotation /// 0005730 // nucleolus // inferred from electronic annotation	0003700 // sequence-specific DNA binding transcription factor activity // inferred from electronic annotation	chr2:203776940-203851060 (+) // 91.59 // q33.2
11763798_a_at	0.37834	-0.0343699	-0.000981569	0.000981808	0.0441437	-0.0279305	0.621497	0.463162	1.07818	0.108598	1.07818	up	STMN4	81551	0035556 // intracellular signal transduction // inferred from electronic annotation	0005622 // intracellular // inferred from electronic annotation /// 0005794 // Golgi apparatus // inferred from electronic annotation /// 0030424 // axon // inferred from electronic annotation /// 0030426 // growth cone // inferred from electronic annotation /// 0042995 // cell projection // inferred from electronic annotation		chr8:27096856-27115921 (-) // 99.84 // p21.2
11731992_x_at	-0.286381	-0.341114	-0.277163	0.321256	0.322987	0.277163	0.000775243	1.67869e-05	-1.52487	-0.608687	1.52487	down	TROAP	10024	0007155 // cell adhesion // inferred from electronic annotation /// 0007155 // cell adhesion // traceable author statement	0005737 // cytoplasm // inferred from electronic annotation /// 0005737 // cytoplasm // traceable author statement	0005515 // protein binding // inferred from physical interaction	chr12:49716970-49718160 (+) // 76.39 // q13.12
11732719_at	0.192131	0.369429	0.313725	-0.192132	-0.253399	-0.292276	0.00692536	0.000853139	1.45165	0.537697	1.45165	up	EREG	2069	0001525 // angiogenesis // inferred from electronic annotation /// 0001550 // ovarian cumulus expansion // inferred from sequence or structural similarity /// 0001550 // ovarian cumulus expansion // inferred from electronic annotation /// 0001556 // oocyte maturation // inferred from sequence or structural similarity /// 0001556 // oocyte maturation // inferred from electronic annotation /// 0001…	0005576 // extracellular region // traceable author statement /// 0005576 // extracellular region // inferred from electronic annotation /// 0005615 // extracellular space // inferred from direct assay /// 0005615 // extracellular space // inferred from electronic annotation /// 0005886 // plasma membrane // inferred from electronic annotation /// 0005887 // integral to plasma membrane // traceab…	0005154 // epidermal growth factor receptor binding // inferred from sequence or structural similarity /// 0005154 // epidermal growth factor receptor binding // traceable author statement /// 0005154 // epidermal growth factor receptor binding // inferred from electronic annotation /// 0005515 // protein binding // inferred from physical interaction /// 0008083 // growth factor activity // infer…	chr4:75230859-75254477 (+) // 83.41 // q13.3
11740723_x_at	-0.171135	0.0135212	-0.0710764	0.214476	-0.0135212	0.0361853	0.287627	0.150286	-1.11364	-0.155277	1.11364	down	LGALS9B /// LGALS9C	284194 /// 654346			0030246 // carbohydrate binding // inferred from electronic annotation	chr17:18380101-18398173 (+) // 94.88 // p11.2 /// chr17:20352793-20370848 (-) // 95.06 // p11.2
11751552_at	-0.196869	-0.115839	-0.0277386	0.126655	0.0277381	0.110682	0.0766751	0.0248893	-1.15016	-0.20184	1.15016	down	RNF223	401934		0016020 // membrane // inferred from electronic annotation /// 0016021 // integral to membrane // inferred from electronic annotation	0008270 // zinc ion binding // inferred from electronic annotation /// 0046872 // metal ion binding // inferred from electronic annotation	chr1:1007125-1009687 (-) // 95.1 // p36.33
11734940_a_at	-0.0178781	-0.291913	0.0472422	-0.162489	0.0178781	0.199157	0.664064	0.512693	-1.07602	-0.105698	1.07602	down	SLC16A9	220963	0006810 // transport // inferred from electronic annotation /// 0046415 // urate metabolic process // inferred from mutant phenotype /// 0055085 // transmembrane transport // inferred from electronic annotation	0005886 // plasma membrane // inferred from electronic annotation /// 0016020 // membrane // inferred from electronic annotation /// 0016021 // integral to membrane // inferred from electronic annotation	0015293 // symporter activity // inferred from electronic annotation	chr10:61410522-61469837 (-) // 91.24 // q21.2
11755071_a_at	0.00595188	0.177861	0.0542381	-0.206146	-0.00595188	-0.250877	0.151364	0.0622187	1.17583	0.233676	1.17583	up	HMCN1	83872	0007596 // blood coagulation // inferred from electronic annotation /// 0007601 // visual perception // inferred from electronic annotation /// 0050896 // response to stimulus // inferred from electronic annotation	0005576 // extracellular region // inferred from electronic annotation /// 0005578 // proteinaceous extracellular matrix // inferred from electronic annotation /// 0005604 // basement membrane // inferred from electronic annotation /// 0005938 // cell cortex // inferred from electronic annotation /// 0016020 // membrane // inferred from electronic annotation /// 0030054 // cell junction // inferr…	0004888 // transmembrane signaling receptor activity // inferred from electronic annotation /// 0005509 // calcium ion binding // inferred from electronic annotation	chr1:186097341-186160079 (+) // 96.21 // q31.1
11759789_x_at	0.000511646	-0.000511646	-0.103019	0.0207155	-0.0714812	0.0280435	0.735357	0.599153	-1.01873	-0.0267656	1.01873	down	NLGN4Y	22829	0007155 // cell adhesion // inferred from electronic annotation /// 0007416 // synapse assembly // not recorded	0005886 // plasma membrane // inferred from electronic annotation /// 0005887 // integral to plasma membrane // not recorded /// 0009986 // cell surface // not recorded /// 0014069 // postsynaptic density // inferred from electronic annotation /// 0016020 // membrane // inferred from electronic annotation /// 0016021 // integral to membrane // inferred from electronic annotation /// 0030054 // ce…	0004091 // carboxylesterase activity // not recorded /// 0004872 // receptor activity // not recorded /// 0005515 // protein binding // inferred from physical interaction /// 0042043 // neurexin family protein binding // not recorded	chrY:16734097-16845419 (+) // 80.05 // q11.221
11750395_a_at	0.147133	0.00193453	-0.0846467	-0.00193453	-0.0921884	0.0117745	0.695178	0.55015	1.03449	0.0489232	1.03449	up	GLI2	2736	0000122 // negative regulation of transcription from RNA polymerase II promoter // inferred from electronic annotation /// 0000122 // negative regulation of transcription from RNA polymerase II promoter // inferred from mutant phenotype /// 0001501 // skeletal system development // inferred from electronic annotation /// 0001501 // skeletal system development // inferred from sequence or structur…	0005622 // intracellular // inferred from electronic annotation /// 0005624 // membrane fraction // inferred from electronic annotation /// 0005634 // nucleus // inferred from direct assay /// 0005634 // nucleus // inferred from electronic annotation /// 0005737 // cytoplasm // inferred from electronic annotation /// 0005929 // cilium // inferred from electronic annotation /// 0031512 // motile p…	0003676 // nucleic acid binding // inferred from electronic annotation /// 0003677 // DNA binding // inferred from electronic annotation /// 0003682 // chromatin binding // inferred from electronic annotation /// 0003700 // sequence-specific DNA binding transcription factor activity // inferred from direct assay /// 0003700 // sequence-specific DNA binding transcription factor activity // inferre…	chr2:121554871-121748562 (+) // 99.96 // q14.2
11738202_x_at	0.055789	0.0787373	0.0195694	-0.0195694	-0.125422	-0.07479	0.0741411	0.0237531	1.09022	0.124626	1.09022	up	DAXX	1616	0000281 // cytokinesis after mitosis // inferred from electronic annotation /// 0006351 // transcription, DNA-dependent // inferred from electronic annotation /// 0006355 // regulation of transcription, DNA-dependent // inferred from direct assay /// 0006355 // regulation of transcription, DNA-dependent // inferred from electronic annotation /// 0006915 // apoptotic process // traceable author st…	0000775 // chromosome, centromeric region // inferred from electronic annotation /// 0000792 // heterochromatin // inferred from electronic annotation /// 0005634 // nucleus // inferred from direct assay /// 0005634 // nucleus // inferred from mutant phenotype /// 0005634 // nucleus // inferred from electronic annotation /// 0005654 // nucleoplasm // inferred from electronic annotation /// 000569…	0002039 // p53 binding // inferred from physical interaction /// 0005057 // receptor signaling protein activity // traceable author statement /// 0005515 // protein binding // inferred from physical interaction /// 0008134 // transcription factor binding // inferred from direct assay /// 0019899 // enzyme binding // inferred from physical interaction /// 0031072 // heat shock protein binding // t…	chr6:33286335-33290793 (-) // 94.47 // p21.32
11721048_s_at	0.032958	0.120116	0.101842	-0.251601	-0.157421	-0.032958	0.0831273	0.027693	1.17471	0.232299	1.17471	up	N6AMT2	221143	0032259 // methylation // inferred from electronic annotation		0003676 // nucleic acid binding // inferred from electronic annotation /// 0008168 // methyltransferase activity // inferred from electronic annotation /// 0016740 // transferase activity // inferred from electronic annotation	chr13:21302638-21348057 (-) // 88.65 // q12.11
11725050_a_at	-0.0419283	-0.0537667	-0.00778198	0.0592375	0.00778198	0.121805	0.133774	0.052624	-1.06987	-0.0974337	1.06987	down	FAIM2	23017	0006915 // apoptotic process // inferred from electronic annotation /// 0006916 // anti-apoptosis // non-traceable author statement /// 0007417 // central nervous system development // inferred from electronic annotation /// 0021549 // cerebellum development // inferred from sequence or structural similarity /// 0021549 // cerebellum development // inferred from electronic annotation /// 0021680 …	0005886 // plasma membrane // inferred from electronic annotation /// 0016020 // membrane // inferred from electronic annotation /// 0016021 // integral to membrane // inferred from electronic annotation /// 0030054 // cell junction // inferred from electronic annotation /// 0045121 // membrane raft // inferred from direct assay /// 0045121 // membrane raft // inferred from electronic annotation …		chr12:50260679-50298000 (-) // 94.11 // q13.12
11754927_x_at	-0.432615	-0.398927	-0.438932	0.398928	0.399659	0.492862	0.000714874	1.41832e-05	-1.80747	-0.853974	1.80747	down	PRKACB	5567	0005975 // carbohydrate metabolic process // traceable author statement /// 0006006 // glucose metabolic process // traceable author statement /// 0006094 // gluconeogenesis // traceable author statement /// 0006112 // energy reserve metabolic process // traceable author statement /// 0006468 // protein phosphorylation // inferred from direct assay /// 0006468 // protein phosphorylation // inferr…	0005634 // nucleus // inferred from electronic annotation /// 0005654 // nucleoplasm // traceable author statement /// 0005737 // cytoplasm // inferred from electronic annotation /// 0005813 // centrosome // inferred from direct assay /// 0005829 // cytosol // traceable author statement /// 0005886 // plasma membrane // inferred from electronic annotation /// 0005952 // cAMP-dependent protein kin…	0000166 // nucleotide binding // inferred from electronic annotation /// 0000287 // magnesium ion binding // inferred from direct assay /// 0004672 // protein kinase activity // inferred from electronic annotation /// 0004674 // protein serine/threonine kinase activity // inferred from electronic annotation /// 0004691 // cAMP-dependent protein kinase activity // inferred from direct assay /// 00…	chr1:84630322-84670977 (+) // 93.82 // p31.1
11733355_x_at	-0.0314038	0.0747368	0.143217	0.0314038	-0.0906062	-0.0519631	0.334336	0.186184	1.07121	0.0992383	1.07121	up	C5AR1	728	0000187 // activation of MAPK activity // traceable author statement /// 0006935 // chemotaxis // traceable author statement /// 0006935 // chemotaxis // inferred from electronic annotation /// 0006955 // immune response // traceable author statement /// 0006968 // cellular defense response // traceable author statement /// 0007165 // signal transduction // traceable author statement /// 0007165 …	0005886 // plasma membrane // traceable author statement /// 0005886 // plasma membrane // inferred from electronic annotation /// 0005887 // integral to plasma membrane // traceable author statement /// 0016020 // membrane // inferred from electronic annotation /// 0016021 // integral to membrane // inferred from electronic annotation	0004871 // signal transducer activity // inferred from electronic annotation /// 0004872 // receptor activity // inferred from electronic annotation /// 0004930 // G-protein coupled receptor activity // inferred from electronic annotation /// 0004942 // anaphylatoxin receptor activity // inferred from electronic annotation /// 0004944 // C5a anaphylatoxin receptor activity // inferred from electr…	chr19:47813074-47825323 (+) // 71.91 // q13.32
11721523_s_at	0.159765	0.196083	0.175269	-0.163704	-0.159765	-0.170077	0.000492569	6.27644e-06	1.26712	0.341555	1.26712	up	ZNF706	51123		0005622 // intracellular // inferred from electronic annotation	0008270 // zinc ion binding // inferred from electronic annotation /// 0046872 // metal ion binding // inferred from electronic annotation	chr8:102209271-102217960 (-) // 97.31 // q22.3
11743114_at	-0.0382414	-0.0226831	-0.0434265	0.0324373	0.0514946	0.0226831	0.0148271	0.0025935	-1.04995	-0.0703221	1.04995	down	DHX15	1665	0006397 // mRNA processing // inferred from electronic annotation /// 0006397 // mRNA processing // traceable author statement /// 0008380 // RNA splicing // inferred by curator /// 0008380 // RNA splicing // inferred from electronic annotation	0005634 // nucleus // traceable author statement /// 0005634 // nucleus // inferred from electronic annotation /// 0005689 // U12-type spliceosomal complex // inferred from direct assay /// 0005730 // nucleolus // inferred from electronic annotation	0000166 // nucleotide binding // inferred from electronic annotation /// 0003676 // nucleic acid binding // inferred from electronic annotation /// 0003724 // RNA helicase activity // traceable author statement /// 0004386 // helicase activity // inferred from electronic annotation /// 0005524 // ATP binding // inferred from electronic annotation /// 0008026 // ATP-dependent helicase activity // …	chr4:24529097-24586226 (-) // 96.31 // p15.2
11722186_a_at	0.131703	-0.0180531	0.0975113	0.0145264	-0.0546093	-0.0145264	0.284953	0.148271	1.06333	0.0885903	1.06333	up	AKT1	207	0000060 // protein import into nucleus, translocation // inferred from mutant phenotype /// 0001893 // maternal placenta development // inferred from electronic annotation /// 0001934 // positive regulation of protein phosphorylation // inferred from direct assay /// 0005975 // carbohydrate metabolic process // inferred from electronic annotation /// 0005977 // glycogen metabolic process // infer…	0005625 // soluble fraction // inferred from electronic annotation /// 0005634 // nucleus // inferred from direct assay /// 0005634 // nucleus // traceable author statement /// 0005634 // nucleus // inferred from electronic annotation /// 0005654 // nucleoplasm // traceable author statement /// 0005654 // nucleoplasm // inferred from electronic annotation /// 0005737 // cytoplasm // inferred from…	0000166 // nucleotide binding // inferred from electronic annotation /// 0004672 // protein kinase activity // traceable author statement /// 0004672 // protein kinase activity // inferred from electronic annotation /// 0004674 // protein serine/threonine kinase activity // inferred from direct assay /// 0004674 // protein serine/threonine kinase activity // traceable author statement /// 0004674…	chr14:105235685-105261441 (-) // 94.1 // q32.33
11720622_a_at	-0.194112	0.00370979	-0.0419559	0.187205	0.130589	-0.00370979	0.201443	0.0914291	-1.13457	-0.182147	1.13457	down	CDK16	5127	0006468 // protein phosphorylation // non-traceable author statement /// 0006468 // protein phosphorylation // inferred from electronic annotation /// 0006468 // protein phosphorylation // traceable author statement /// 0007049 // cell cycle // inferred from electronic annotation /// 0016310 // phosphorylation // inferred from electronic annotation		0000166 // nucleotide binding // inferred from electronic annotation /// 0004672 // protein kinase activity // non-traceable author statement /// 0004672 // protein kinase activity // inferred from electronic annotation /// 0004674 // protein serine/threonine kinase activity // traceable author statement /// 0004674 // protein serine/threonine kinase activity // inferred from electronic annotatio…	chrX:47078075-47089396 (+) // 93.74 // p11.23
11737847_a_at	0.0408683	0.136857	-0.0841846	-0.245769	-0.0408688	0.0905604	0.614983	0.4554	1.06921	0.0965392	1.06921	up	MR1	3140	0002474 // antigen processing and presentation of peptide antigen via MHC class I // inferred from electronic annotation /// 0006955 // immune response // inferred from electronic annotation /// 0006955 // immune response // traceable author statement /// 0019882 // antigen processing and presentation // inferred from electronic annotation	0005576 // extracellular region // inferred from electronic annotation /// 0005783 // endoplasmic reticulum // inferred from electronic annotation /// 0005886 // plasma membrane // inferred from electronic annotation /// 0016020 // membrane // inferred from electronic annotation /// 0016021 // integral to membrane // inferred from electronic annotation /// 0042612 // MHC class I protein complex /…	0032393 // MHC class I receptor activity // traceable author statement	chr1:181003104-181024633 (+) // 99.92 // q25.3
11738346_at	0.0428398	-0.046618	-0.0880153	-0.0336988	0.0336988	0.165172	0.454033	0.288276	-1.06117	-0.0856553	1.06117	down	ZNF713	349075	0006351 // transcription, DNA-dependent // inferred from electronic annotation /// 0006355 // regulation of transcription, DNA-dependent // inferred from electronic annotation	0005622 // intracellular // inferred from electronic annotation /// 0005634 // nucleus // inferred from electronic annotation	0003676 // nucleic acid binding // inferred from electronic annotation /// 0003677 // DNA binding // inferred from electronic annotation /// 0008270 // zinc ion binding // inferred from electronic annotation /// 0046872 // metal ion binding // inferred from electronic annotation	chr7:55980330-56008433 (+) // 75.8 // p11.2
11723580_at	-0.132621	-0.20396	-0.211387	0.184948	0.132621	0.157297	0.00369971	0.000312036	-1.26659	-0.340945	1.26659	down	C6orf228	221710		0016020 // membrane // inferred from electronic annotation /// 0016021 // integral to membrane // inferred from electronic annotation	0003677 // DNA binding // inferred from electronic annotation	chr6:11094033-11138971 (+) // 76.8 // p24.2
11728834_x_at	0.191264	-0.0147033	0.0027113	-0.0027113	0.0179405	-0.031055	0.554781	0.38961	1.04611	0.0650326	1.04611	up	C4orf32	132720		0016020 // membrane // inferred from electronic annotation /// 0016021 // integral to membrane // inferred from electronic annotation		chr4:113066522-113110237 (+) // 91.55 // q25
11735867_a_at	-0.263825	0.171802	-0.329533	0.031702	-0.031702	0.0869207	0.518354	0.351842	-1.12466	-0.169492	1.12466	down	C5orf46	389336		0005576 // extracellular region // inferred from electronic annotation		chr5:147272271-147286101 (-) // 87.39 // q32
11763325_a_at	-0.0222721	-0.0927262	-0.20464	0.0832615	0.0222721	0.148201	0.111491	0.0411453	-1.14165	-0.191124	1.14165	down	FER	2241	0000226 // microtubule cytoskeleton organization // inferred from mutant phenotype /// 0000278 // mitotic cell cycle // inferred from mutant phenotype /// 0001932 // regulation of protein phosphorylation // inferred from sequence or structural similarity /// 0006468 // protein phosphorylation // traceable author statement /// 0006468 // protein phosphorylation // inferred from electronic annotati…	0000790 // nuclear chromatin // inferred from direct assay /// 0005634 // nucleus // inferred from direct assay /// 0005634 // nucleus // inferred from electronic annotation /// 0005737 // cytoplasm // inferred from direct assay /// 0005737 // cytoplasm // inferred from electronic annotation /// 0005829 // cytosol // traceable author statement /// 0005856 // cytoskeleton // inferred from electron…	0000166 // nucleotide binding // inferred from electronic annotation /// 0003779 // actin binding // inferred from electronic annotation /// 0004672 // protein kinase activity // inferred from electronic annotation /// 0004713 // protein tyrosine kinase activity // traceable author statement /// 0004713 // protein tyrosine kinase activity // inferred from electronic annotation /// 0004715 // non-…	chr5:108527194-108532539 (+) // 97.54 // q21.3
11737234_s_at	0.199119	0.291893	0.309912	-0.31268	-0.267188	-0.199119	0.00415837	0.000379932	1.44057	0.526637	1.44057	up	USP6	9098	0006464 // cellular protein modification process // non-traceable author statement /// 0006508 // proteolysis // inferred from electronic annotation /// 0006511 // ubiquitin-dependent protein catabolic process // inferred from electronic annotation /// 0016579 // protein deubiquitination // inferred from direct assay /// 0032313 // regulation of Rab GTPase activity // inferred from electronic ann…	0005622 // intracellular // inferred from electronic annotation /// 0005737 // cytoplasm // inferred from direct assay /// 0005737 // cytoplasm // inferred from electronic annotation /// 0005764 // lysosome // traceable author statement /// 0005768 // endosome // inferred from electronic annotation /// 0005886 // plasma membrane // inferred from direct assay /// 0005886 // plasma membrane // infe…	0003676 // nucleic acid binding // traceable author statement /// 0004197 // cysteine-type endopeptidase activity // traceable author statement /// 0004221 // ubiquitin thiolesterase activity // inferred from electronic annotation /// 0004843 // ubiquitin-specific protease activity // inferred from direct assay /// 0005097 // Rab GTPase activator activity // inferred from electronic annotation //…	chr17:5031686-5078339 (+) // 97.26 // p13.2
11756771_x_at	0.416033	0.42346	0.322715	-0.348409	-0.334081	-0.322715	0.000972581	2.65616e-05	1.65001	0.722471	1.65001	up	SPTY2D1	144108				chr11:18627948-18634012 (-) // 95.06 // p15.1
11728637_a_at	-0.097167	-0.173998	-0.126498	0.097167	0.136097	0.14468	0.00577428	0.000639854	-1.19626	-0.258536	1.19626	down	ATP5A1	498	0001937 // negative regulation of endothelial cell proliferation // inferred from mutant phenotype /// 0006172 // ADP biosynthetic process // inferred from electronic annotation /// 0006200 // ATP catabolic process // inferred from direct assay /// 0006200 // ATP catabolic process // inferred from electronic annotation /// 0006629 // lipid metabolic process // inferred from sequence or structural…	0000275 // mitochondrial proton-transporting ATP synthase complex, catalytic core F(1) // inferred from electronic annotation /// 0005739 // mitochondrion // inferred by curator /// 0005739 // mitochondrion // non-traceable author statement /// 0005739 // mitochondrion // inferred from electronic annotation /// 0005743 // mitochondrial inner membrane // inferred from direct assay /// 0005743 // m…	0000166 // nucleotide binding // inferred from electronic annotation /// 0005515 // protein binding // inferred from physical interaction /// 0005524 // ATP binding // inferred from sequence or structural similarity /// 0005524 // ATP binding // inferred from electronic annotation /// 0016820 // hydrolase activity, acting on acid anhydrides, catalyzing transmembrane movement of substances // infe…	chr18:43664112-43678287 (-) // 93.66 // q21.1
11722243_a_at	-0.23033	0.0495386	-0.0495386	-0.36449	0.115026	0.0576482	0.968224	0.944071	-1.00894	-0.0128381	1.00894	down	FBXO25	26260	0016567 // protein ubiquitination // inferred from sequence or structural similarity /// 0016567 // protein ubiquitination // non-traceable author statement /// 0016567 // protein ubiquitination // inferred from electronic annotation	0000151 // ubiquitin ligase complex // non-traceable author statement /// 0005634 // nucleus // inferred from sequence or structural similarity /// 0005634 // nucleus // inferred from electronic annotation /// 0019005 // SCF ubiquitin ligase complex // inferred from sequence or structural similarity	0003779 // actin binding // inferred from electronic annotation /// 0004842 // ubiquitin-protein ligase activity // non-traceable author statement	chr8:356807-419873 (+) // 95.1 // p23.3
11743732_a_at	0.638692	0.515018	0.568809	-0.515018	-0.519729	-0.527363	0.000513074	6.94901e-06	2.13595	1.09488	2.13595	up	RCAN1	1827	0006355 // regulation of transcription, DNA-dependent // traceable author statement /// 0007165 // signal transduction // traceable author statement /// 0007417 // central nervous system development // traceable author statement /// 0007519 // skeletal muscle tissue development // inferred from electronic annotation /// 0008015 // blood circulation // traceable author statement /// 0009612 // res…	0005634 // nucleus // inferred from electronic annotation /// 0005634 // nucleus // traceable author statement /// 0005737 // cytoplasm // inferred from electronic annotation	0003677 // DNA binding // traceable author statement /// 0003700 // sequence-specific DNA binding transcription factor activity // traceable author statement /// 0005515 // protein binding // inferred from physical interaction	chr21:35888789-35987510 (-) // 95.78 // q22.12
11724603_a_at	0.0714717	-0.156887	-0.098464	0.0233574	0.0386996	-0.0233574	0.521381	0.354954	-1.05277	-0.0741928	1.05277	down	ZNF219	51222	0006351 // transcription, DNA-dependent // inferred from direct assay /// 0006351 // transcription, DNA-dependent // inferred from electronic annotation /// 0006351 // transcription, DNA-dependent // traceable author statement /// 0006355 // regulation of transcription, DNA-dependent // inferred from mutant phenotype /// 0006355 // regulation of transcription, DNA-dependent // traceable author st…	0005622 // intracellular // inferred from electronic annotation /// 0005634 // nucleus // inferred from direct assay /// 0005634 // nucleus // inferred from electronic annotation /// 0016021 // integral to membrane // inferred from electronic annotation	0003676 // nucleic acid binding // inferred from electronic annotation /// 0003677 // DNA binding // inferred from direct assay /// 0003677 // DNA binding // inferred from electronic annotation /// 0003700 // sequence-specific DNA binding transcription factor activity // inferred from direct assay /// 0003700 // sequence-specific DNA binding transcription factor activity // traceable author state…	chr14:21558236-21566808 (-) // 88.24 // q11.2
11764222_at	0.0102348	-0.208649	-0.0102348	-0.0697889	0.162704	0.0660458	0.439444	0.27533	-1.08865	-0.122537	1.08865	down						chr2:39011611-39012122 (-) // 83.98 // p22.1
11722426_a_at	0.113062	0.00416732	-0.125554	-0.125554	0.0740743	-0.00416732	0.923535	0.869617	1.01099	0.0157742	1.01099	up	FGL2	10875	0007165 // signal transduction // inferred from electronic annotation	0005576 // extracellular region // inferred from electronic annotation /// 0005577 // fibrinogen complex // traceable author statement /// 0005615 // extracellular space // inferred from electronic annotation	0005102 // receptor binding // inferred from electronic annotation	chr7:76822675-76829201 (-) // 84.6 // q11.23
11757396_s_at	0.529878	0.834615	0.959576	-0.792688	-0.529879	-0.539218	0.00675971	0.0008211	2.6304	1.39528	2.6304	up	ANXA8 /// ANXA8L1 /// ANXA8L2	244 /// 653145 /// 728113	0007596 // blood coagulation // inferred from electronic annotation /// 0007599 // hemostasis // inferred from electronic annotation		0005509 // calcium ion binding // inferred from electronic annotation /// 0005544 // calcium-dependent phospholipid binding // inferred from electronic annotation /// 0046872 // metal ion binding // inferred from electronic annotation	chr10:47157982-47158897 (-) // 84.59 // q11.22
11758071_s_at	0.200227	-0.0814052	-0.0457568	0.454619	-0.119792	0.0457568	0.75263	0.622232	-1.07364	-0.102507	1.07364	down	SULF1	23213	0001822 // kidney development // inferred from sequence or structural similarity /// 0001822 // kidney development // inferred from electronic annotation /// 0001937 // negative regulation of endothelial cell proliferation // inferred from direct assay /// 0002063 // chondrocyte development // inferred from sequence or structural similarity /// 0002063 // chondrocyte development // inferred from …	0005615 // extracellular space // inferred from direct assay /// 0005615 // extracellular space // non-traceable author statement /// 0005783 // endoplasmic reticulum // inferred from direct assay /// 0005783 // endoplasmic reticulum // inferred from electronic annotation /// 0005794 // Golgi apparatus // inferred from sequence or structural similarity /// 0005794 // Golgi apparatus // inferred f…	0003824 // catalytic activity // inferred from electronic annotation /// 0004065 // arylsulfatase activity // inferred from direct assay /// 0004065 // arylsulfatase activity // inferred from mutant phenotype /// 0005509 // calcium ion binding // inferred from electronic annotation /// 0008449 // N-acetylglucosamine-6-sulfatase activity // inferred from direct assay /// 0008449 // N-acetylglucosa…	chr8:70571572-70572292 (+) // 98.49 // q13.3
11762015_at	0.17537	-0.230193	0.0361779	-0.0298679	-0.0541368	0.0298681	0.958557	0.927159	1.00823	0.0118304	1.00823	up	EPB41L4A	64097		0005737 // cytoplasm // inferred from electronic annotation /// 0005856 // cytoskeleton // inferred from electronic annotation /// 0019898 // extrinsic to membrane // inferred from electronic annotation	0008092 // cytoskeletal protein binding // inferred from electronic annotation	chr5:111599122-111755010 (-) // 86.01 // q22.2
11764105_at	-0.0401406	0.0212579	0.0429225	-0.0972238	0.0691199	-0.0212581	0.79132	0.674709	1.0171	0.0244672	1.0171	up						chr7:48122624-48123183 (-) // 57.22 // p12.3
11727897_a_at	0.0585794	0.0419264	0.0601225	-0.0673056	-0.0419264	-0.0553141	0.00374437	0.000318055	1.07803	0.108391	1.07803	up	NAA38	51691	0000398 // nuclear mRNA splicing, via spliceosome // non-traceable author statement /// 0006397 // mRNA processing // inferred from electronic annotation /// 0008380 // RNA splicing // inferred from electronic annotation	0005634 // nucleus // non-traceable author statement /// 0005634 // nucleus // inferred from electronic annotation /// 0030529 // ribonucleoprotein complex // inferred from electronic annotation	0003723 // RNA binding // inferred from electronic annotation /// 0005515 // protein binding // inferred from physical interaction /// 0017070 // U6 snRNA binding // non-traceable author statement	chr7:117824085-117833660 (+) // 83.17 // q31.31
11732797_x_at	-0.022985	-0.0971766	-0.0558825	0.198952	0.022985	0.0827112	0.12049	0.045739	-1.11747	-0.160231	1.11747	down	KIAA1841	84542				chr2:61293004-61351411 (+) // 89.75 // p16.1
11761694_at	-0.110916	-0.043179	0.0451732	0.0401473	0.0223365	-0.0223365	0.532666	0.366692	-1.03504	-0.0496895	1.03504	down	LOC100289424	100289424				chr10:134777218-134778783 (-) // 76.68 // q26.3
11745160_s_at	0.0585728	0.0543175	0.0699921	-0.106689	-0.0911236	-0.0543175	0.00698662	0.000865263	1.10573	0.145004	1.10573	up	TGFA	7039	0000165 // MAPK cascade // inferred from direct assay /// 0000187 // activation of MAPK activity // inferred from direct assay /// 0001525 // angiogenesis // inferred from electronic annotation /// 0001934 // positive regulation of protein phosphorylation // inferred from electronic annotation /// 0006916 // anti-apoptosis // inferred from electronic annotation /// 0007173 // epidermal growth fac…	0005576 // extracellular region // inferred from electronic annotation /// 0005615 // extracellular space // inferred from direct assay /// 0005615 // extracellular space // inferred from electronic annotation /// 0005634 // nucleus // inferred from electronic annotation /// 0005886 // plasma membrane // inferred from electronic annotation /// 0005886 // plasma membrane // non-traceable author st…	0001948 // glycoprotein binding // inferred from electronic annotation /// 0004708 // MAP kinase kinase activity // inferred from direct assay /// 0005154 // epidermal growth factor receptor binding // inferred from direct assay /// 0005154 // epidermal growth factor receptor binding // inferred from electronic annotation /// 0005515 // protein binding // inferred from physical interaction /// 00…	chr2:70676450-70780904 (-) // 100.0 // p13.3
11737647_at	0.251134	0.289479	0.00413895	-0.0357981	-0.0609865	-0.00413895	0.177356	0.077035	1.16089	0.215225	1.16089	up	EFCAB4B	84766	0002115 // store-operated calcium entry // inferred from mutant phenotype /// 0006810 // transport // inferred from electronic annotation /// 0006811 // ion transport // inferred from electronic annotation /// 0006816 // calcium ion transport // inferred from electronic annotation /// 0032237 // activation of store-operated calcium channel activity // inferred from mutant phenotype /// 0051928 //…	0005634 // nucleus // inferred from direct assay /// 0005730 // nucleolus // inferred from direct assay /// 0005737 // cytoplasm // inferred from direct assay /// 0005737 // cytoplasm // inferred from electronic annotation /// 0005794 // Golgi apparatus // inferred from direct assay	0005509 // calcium ion binding // inferred from direct assay /// 0005509 // calcium ion binding // inferred from electronic annotation /// 0005515 // protein binding // inferred from physical interaction	chr12:3749553-3862366 (-) // 94.39 // p13.32
11733277_a_at	-0.0646105	-0.0551372	-0.192918	0.102962	0.0551372	0.154242	0.0573905	0.0169302	-1.15535	-0.208335	1.15535	down	SLC2A2	6514	0005975 // carbohydrate metabolic process // traceable author statement /// 0006112 // energy reserve metabolic process // traceable author statement /// 0006810 // transport // inferred from electronic annotation /// 0008643 // carbohydrate transport // inferred from electronic annotation /// 0008645 // hexose transport // traceable author statement /// 0009749 // response to glucose stimulus //…	0005624 // membrane fraction // traceable author statement /// 0005737 // cytoplasm // inferred from electronic annotation /// 0005768 // endosome // inferred from electronic annotation /// 0005829 // cytosol // inferred from electronic annotation /// 0005886 // plasma membrane // traceable author statement /// 0005886 // plasma membrane // inferred from electronic annotation /// 0005887 // integ…	0005158 // insulin receptor binding // inferred from electronic annotation /// 0005215 // transporter activity // inferred from electronic annotation /// 0005355 // glucose transmembrane transporter activity // not recorded /// 0005355 // glucose transmembrane transporter activity // inferred from electronic annotation /// 0005355 // glucose transmembrane transporter activity // traceable author …	chr3:170713801-170744768 (-) // 99.31 // q26.2
11730952_a_at	0.0992947	-0.0310936	0.0115905	0.0032053	-0.0032053	-0.0228629	0.593986	0.431694	1.024	0.0342181	1.024	up	PDK3	5165	0000160 // two-component signal transduction system (phosphorelay) // inferred from electronic annotation /// 0005975 // carbohydrate metabolic process // inferred from electronic annotation /// 0006006 // glucose metabolic process // inferred from electronic annotation /// 0006006 // glucose metabolic process // traceable author statement /// 0006090 // pyruvate metabolic process // traceable au…	0005739 // mitochondrion // traceable author statement /// 0005739 // mitochondrion // inferred from electronic annotation /// 0005759 // mitochondrial matrix // traceable author statement /// 0005759 // mitochondrial matrix // inferred from electronic annotation	0000155 // two-component sensor activity // inferred from electronic annotation /// 0000166 // nucleotide binding // inferred from electronic annotation /// 0004672 // protein kinase activity // inferred from direct assay /// 0004672 // protein kinase activity // traceable author statement /// 0004673 // protein histidine kinase activity // inferred from electronic annotation /// 0004740 // pyruv…	chrX:24483343-24558207 (+) // 99.17 // p22.11
11718170_a_at	0.140642	-0.0689116	0.169221	-0.0365348	-0.00859547	0.00859547	0.457408	0.291639	1.06621	0.0924952	1.06621	up	MLL4	9757	0006351 // transcription, DNA-dependent // inferred from electronic annotation /// 0006355 // regulation of transcription, DNA-dependent // inferred from electronic annotation /// 0016568 // chromatin modification // inferred from electronic annotation /// 0032259 // methylation // inferred from electronic annotation /// 0048096 // chromatin-mediated maintenance of transcription // non-traceable …	0005634 // nucleus // inferred from direct assay /// 0005634 // nucleus // non-traceable author statement /// 0005634 // nucleus // inferred from electronic annotation /// 0035097 // histone methyltransferase complex // inferred from direct assay /// 0035097 // histone methyltransferase complex // inferred from electronic annotation	0003677 // DNA binding // inferred from electronic annotation /// 0003700 // sequence-specific DNA binding transcription factor activity // non-traceable author statement /// 0005515 // protein binding // inferred from physical interaction /// 0008168 // methyltransferase activity // inferred from electronic annotation /// 0008270 // zinc ion binding // non-traceable author statement /// 0008270 …	chr19:36208910-36229779 (+) // 94.07 // q13.12
11731567_a_at	-0.0289116	0.067699	0.0289121	-0.0831342	0.0465455	-0.108774	0.434707	0.271077	1.05046	0.0710207	1.05046	up	MDM2	4193	0000075 // cell cycle checkpoint // traceable author statement /// 0000122 // negative regulation of transcription from RNA polymerase II promoter // inferred from direct assay /// 0006461 // protein complex assembly // inferred from direct assay /// 0006977 // DNA damage response, signal transduction by p53 class mediator resulting in cell cycle arrest // inferred from mutant phenotype /// 00069…	0005622 // intracellular // inferred from electronic annotation /// 0005634 // nucleus // inferred from direct assay /// 0005634 // nucleus // inferred from electronic annotation /// 0005634 // nucleus // inferred from mutant phenotype /// 0005654 // nucleoplasm // inferred from direct assay /// 0005654 // nucleoplasm // traceable author statement /// 0005654 // nucleoplasm // inferred from elect…	0002039 // p53 binding // inferred from physical interaction /// 0002039 // p53 binding // inferred from electronic annotation /// 0004842 // ubiquitin-protein ligase activity // inferred from direct assay /// 0004842 // ubiquitin-protein ligase activity // inferred from mutant phenotype /// 0004842 // ubiquitin-protein ligase activity // inferred from electronic annotation /// 0005515 // protein…	chr12:69201965-69239321 (+) // 78.58 // q15
11720947_x_at	0.330337	0.34354	0.327672	-0.377233	-0.370376	-0.327672	0.000334862	1.8203e-06	1.61583	0.692277	1.61583	up	CA12	771	0006730 // one-carbon metabolic process // inferred from electronic annotation	0016020 // membrane // inferred from electronic annotation /// 0016021 // integral to membrane // inferred from electronic annotation /// 0016021 // integral to membrane // traceable author statement	0004089 // carbonate dehydratase activity // inferred from electronic annotation /// 0004089 // carbonate dehydratase activity // traceable author statement /// 0008270 // zinc ion binding // inferred from electronic annotation /// 0008270 // zinc ion binding // traceable author statement /// 0016829 // lyase activity // inferred from electronic annotation /// 0046872 // metal ion binding // infe…	chr15:63614615-63674659 (-) // 87.76 // q22.2
11733669_a_at	0.0119805	0.089819	-0.0119805	0.0928192	-0.089591	-0.194033	0.520435	0.353874	1.06699	0.0935414	1.06699	up	PAX3	5077	0000435 // positive regulation of transcription from RNA polymerase II promoter by galactose // inferred from direct assay /// 0000435 // positive regulation of transcription from RNA polymerase II promoter by galactose // inferred from electronic annotation /// 0001755 // neural crest cell migration // inferred from electronic annotation /// 0001843 // neural tube closure // inferred from electr…	0000790 // nuclear chromatin // inferred from direct assay /// 0005634 // nucleus // inferred from electronic annotation /// 0005654 // nucleoplasm // traceable author statement	0003677 // DNA binding // inferred from electronic annotation /// 0003682 // chromatin binding // inferred from electronic annotation /// 0003700 // sequence-specific DNA binding transcription factor activity // inferred from electronic annotation /// 0003700 // sequence-specific DNA binding transcription factor activity // traceable author statement /// 0003705 // RNA polymerase II distal enhanc…	chr2:223158348-223163700 (-) // 93.5 // q36.1
11750492_a_at	-0.0573516	-0.177151	-0.0822973	0.0573516	0.124482	0.0629544	0.0433291	0.011516	-1.13855	-0.187196	1.13855	down	RNF216	54476	0006915 // apoptotic process // inferred from electronic annotation /// 0016567 // protein ubiquitination // inferred from electronic annotation /// 0032648 // regulation of interferon-beta production // inferred from direct assay /// 0043161 // proteasomal ubiquitin-dependent protein catabolic process // inferred from direct assay /// 0044419 // interspecies interaction between organisms // infe…	0005634 // nucleus // inferred from direct assay /// 0005730 // nucleolus // inferred from direct assay /// 0005737 // cytoplasm // inferred from direct assay /// 0005737 // cytoplasm // inferred from electronic annotation	0005515 // protein binding // inferred from physical interaction /// 0008270 // zinc ion binding // inferred from electronic annotation /// 0016874 // ligase activity // inferred from electronic annotation /// 0046872 // metal ion binding // inferred from electronic annotation	chr7:5662209-5821257 (-) // 99.92 // p22.1
11754372_x_at	0.0390966	-0.0268061	0.0195656	0.137094	-0.0604434	-0.0195656	0.942557	0.900716	-1.00585	-0.00840947	1.00585	down	CERS4	79603	0006355 // regulation of transcription, DNA-dependent // inferred from electronic annotation /// 0006665 // sphingolipid metabolic process // traceable author statement /// 0008610 // lipid biosynthetic process // inferred from electronic annotation /// 0030148 // sphingolipid biosynthetic process // traceable author statement /// 0030148 // sphingolipid biosynthetic process // inferred from elec…	0005634 // nucleus // inferred from electronic annotation /// 0005783 // endoplasmic reticulum // inferred from electronic annotation /// 0005789 // endoplasmic reticulum membrane // traceable author statement /// 0005789 // endoplasmic reticulum membrane // inferred from electronic annotation /// 0016020 // membrane // inferred from electronic annotation /// 0016021 // integral to membrane // in…	0003677 // DNA binding // inferred from electronic annotation /// 0003700 // sequence-specific DNA binding transcription factor activity // inferred from electronic annotation /// 0043565 // sequence-specific DNA binding // inferred from electronic annotation /// 0050291 // sphingosine N-acyltransferase activity // inferred from electronic annotation	chr19:8315409-8327305 (+) // 87.21 // p13.2
11753119_x_at	-0.178486	0.0444198	-0.162191	0.0728478	-0.0444198	0.130401	0.302102	0.160846	-1.11087	-0.151696	1.11087	down	CMTM5	116173	0006935 // chemotaxis // inferred from electronic annotation	0005615 // extracellular space // inferred from electronic annotation /// 0016020 // membrane // inferred from electronic annotation /// 0016021 // integral to membrane // inferred from electronic annotation	0005125 // cytokine activity // inferred from electronic annotation	chr14:23846254-23848980 (+) // 96.99 // q11.2
11755632_a_at	0.00192904	-0.0407338	0.333348	-0.284824	-0.00192904	0.0891621	0.537803	0.371851	1.12042	0.164045	1.12042	up	MYH14	79784	0007411 // axon guidance // traceable author statement /// 0008360 // regulation of cell shape // inferred from electronic annotation /// 0030048 // actin filament-based movement // inferred from electronic annotation	0001725 // stress fiber // inferred from electronic annotation /// 0005737 // cytoplasm // inferred from electronic annotation /// 0016459 // myosin complex // inferred from electronic annotation /// 0030424 // axon // inferred from electronic annotation /// 0030426 // growth cone // inferred from electronic annotation	0000146 // microfilament motor activity // inferred from electronic annotation /// 0000166 // nucleotide binding // inferred from electronic annotation /// 0003774 // motor activity // inferred from electronic annotation /// 0003779 // actin binding // inferred from electronic annotation /// 0005516 // calmodulin binding // inferred from electronic annotation /// 0005524 // ATP binding // inferre…	chr19:50783290-50813796 (+) // 92.75 // q13.33
11755668_s_at	0.00292158	0.0476751	0.0328073	-0.0539608	-0.00292158	-0.133353	0.192026	0.085635	1.06527	0.0912133	1.06527	up	ATP5J2-PTCD1 /// PTCD1	100526740 /// 26024				chr7:99016756-99036377 (-) // 99.84 // q22.1
11717584_a_at	0.0818844	-0.126866	0.0235963	-0.209944	-0.0235963	0.17529	0.958958	0.927818	1.00855	0.0122881	1.00855	up	VAPB	9217	0006665 // sphingolipid metabolic process // traceable author statement /// 0006874 // cellular calcium ion homeostasis // inferred from mutant phenotype /// 0006986 // response to unfolded protein // inferred from electronic annotation /// 0006987 // activation of signaling protein activity involved in unfolded protein response // inferred from direct assay /// 0008219 // cell death // inferred …	0005783 // endoplasmic reticulum // inferred from direct assay /// 0005783 // endoplasmic reticulum // inferred from electronic annotation /// 0005789 // endoplasmic reticulum membrane // inferred from direct assay /// 0005789 // endoplasmic reticulum membrane // traceable author statement /// 0005789 // endoplasmic reticulum membrane // inferred from electronic annotation /// 0005794 // Golgi ap…	0005198 // structural molecule activity // inferred from electronic annotation /// 0005515 // protein binding // inferred from physical interaction /// 0019899 // enzyme binding // inferred from physical interaction /// 0042803 // protein homodimerization activity // inferred from physical interaction /// 0046982 // protein heterodimerization activity // inferred from physical interaction /// 004…	chr20:56964174-57022672 (+) // 94.01 // q13.32
11755180_x_at	0.0290365	0.0895147	0.131679	-0.204365	-0.0290365	-0.0648575	0.11008	0.0404754	1.13511	0.18283	1.13511	up	TCF7	6932	0006351 // transcription, DNA-dependent // inferred from electronic annotation /// 0006355 // regulation of transcription, DNA-dependent // not recorded /// 0006355 // regulation of transcription, DNA-dependent // inferred from electronic annotation /// 0006357 // regulation of transcription from RNA polymerase II promoter // not recorded /// 0006357 // regulation of transcription from RNA polyme…	0005634 // nucleus // inferred from direct assay /// 0005634 // nucleus // inferred from electronic annotation /// 0005667 // transcription factor complex // not recorded	0003677 // DNA binding // inferred from electronic annotation /// 0003682 // chromatin binding // not recorded /// 0003700 // sequence-specific DNA binding transcription factor activity // not recorded /// 0003700 // sequence-specific DNA binding transcription factor activity // inferred from electronic annotation /// 0005515 // protein binding // inferred from physical interaction /// 0008013 //…	chr5:133476225-133483927 (+) // 89.4 // q31.1
11732370_a_at	-0.00270367	0.0788584	0.00270367	0.0569658	-0.00270367	-0.0287085	0.775011	0.652379	1.01239	0.0177682	1.01239	up	CUX1	1523	0000122 // negative regulation of transcription from RNA polymerase II promoter // inferred from electronic annotation /// 0000122 // negative regulation of transcription from RNA polymerase II promoter // traceable author statement /// 0000301 // retrograde transport, vesicle recycling within Golgi // inferred from electronic annotation /// 0006351 // transcription, DNA-dependent // inferred fro…	0000139 // Golgi membrane // inferred from electronic annotation /// 0005634 // nucleus // inferred from direct assay /// 0005634 // nucleus // inferred from electronic annotation /// 0005730 // nucleolus // inferred from direct assay /// 0005737 // cytoplasm // inferred from direct assay /// 0005794 // Golgi apparatus // inferred from electronic annotation /// 0016020 // membrane // inferred fro…	0003677 // DNA binding // inferred from electronic annotation /// 0003682 // chromatin binding // inferred from electronic annotation /// 0003700 // sequence-specific DNA binding transcription factor activity // inferred from electronic annotation /// 0030674 // protein binding, bridging // inferred from electronic annotation /// 0043565 // sequence-specific DNA binding // inferred from electroni…	chr7:101559392-101894560 (+) // 96.23 // q22.1
11747698_x_at	-0.00260973	-0.0944672	-0.0048852	0.102304	0.0584059	0.00260973	0.218129	0.101847	-1.06321	-0.0884274	1.06321	down	TCF4	6925	0000122 // negative regulation of transcription from RNA polymerase II promoter // inferred from electronic annotation /// 0006351 // transcription, DNA-dependent // inferred from electronic annotation /// 0006352 // transcription initiation, DNA-dependent // inferred from sequence or structural similarity /// 0006355 // regulation of transcription, DNA-dependent // inferred from electronic annot…	0005634 // nucleus // inferred from direct assay /// 0005634 // nucleus // inferred from electronic annotation /// 0005667 // transcription factor complex // inferred from sequence or structural similarity /// 0005667 // transcription factor complex // inferred from electronic annotation	0000978 // RNA polymerase II core promoter proximal region sequence-specific DNA binding // inferred from sequence or structural similarity /// 0001011 // sequence-specific DNA binding RNA polymerase recruiting transcription factor activity // inferred from sequence or structural similarity /// 0001077 // RNA polymerase II core promoter proximal region sequence-specific DNA binding transcription …	chr18:52895094-53089743 (-) // 97.67 // q21.2
11729167_a_at	0.101562	0.173003	0.180063	-0.116453	-0.183317	-0.101562	0.00921135	0.00130165	1.21868	0.28532	1.21868	up	DCTD	1635	0006206 // pyrimidine base metabolic process // traceable author statement /// 0006220 // pyrimidine nucleotide metabolic process // traceable author statement /// 0008152 // metabolic process // inferred from electronic annotation /// 0009165 // nucleotide biosynthetic process // inferred from electronic annotation /// 0044281 // small molecule metabolic process // traceable author statement ///…	0005829 // cytosol // traceable author statement	0003824 // catalytic activity // inferred from electronic annotation /// 0004132 // dCMP deaminase activity // not recorded /// 0004132 // dCMP deaminase activity // inferred from electronic annotation /// 0004132 // dCMP deaminase activity // traceable author statement /// 0008270 // zinc ion binding // inferred from electronic annotation /// 0016787 // hydrolase activity // inferred from electr…	chr4:183811246-183838747 (-) // 96.16 // q35.1
11721598_a_at	-0.0297654	-0.19821	0.14782	0.0297656	-0.0820427	0.0822954	0.850431	0.757435	-1.02578	-0.0367243	1.02578	down	EFS	10278	0007155 // cell adhesion // inferred from electronic annotation /// 0035556 // intracellular signal transduction // traceable author statement	0005737 // cytoplasm // traceable author statement	0017124 // SH3 domain binding // inferred from electronic annotation /// 0019904 // protein domain specific binding // inferred from physical interaction	chr14:23825610-23834961 (-) // 96.0 // q11.2
11740575_a_at	-0.0947616	0.0601032	0.0751741	-0.00302601	-0.12077	0.00302601	0.628275	0.471115	1.03797	0.0537617	1.03797	up	SORCS1	114815	0007218 // neuropeptide signaling pathway // non-traceable author statement	0016020 // membrane // inferred from direct assay /// 0016020 // membrane // inferred from electronic annotation /// 0016021 // integral to membrane // inferred from electronic annotation	0004872 // receptor activity // inferred from electronic annotation /// 0005515 // protein binding // inferred from physical interaction /// 0008188 // neuropeptide receptor activity // non-traceable author statement	chr10:108333420-108924466 (-) // 94.17 // q25.1
11758323_s_at	-0.173805	-0.156309	-0.17944	0.254303	0.298834	0.156309	0.00599967	0.000678907	-1.32531	-0.406333	1.32531	down	VOPP1	81552	0006351 // transcription, DNA-dependent // inferred from electronic annotation /// 0006355 // regulation of transcription, DNA-dependent // inferred from electronic annotation /// 0007165 // signal transduction // inferred from mutant phenotype	0005768 // endosome // inferred from direct assay /// 0016020 // membrane // inferred from electronic annotation /// 0016021 // integral to membrane // inferred from electronic annotation /// 0030659 // cytoplasmic vesicle membrane // inferred from direct assay /// 0030659 // cytoplasmic vesicle membrane // inferred from electronic annotation /// 0031301 // integral to organelle membrane // infer…	0004871 // signal transducer activity // inferred from mutant phenotype	chr1:148193220-148194190 (+) // 94.3 // q21.2 /// chr7:55540213-55640134 (-) // 90.13 // p11.2
11732556_a_at	0.198053	-0.181418	0.107497	-0.116909	-0.0502832	0.050283	0.697646	0.553287	1.05727	0.080347	1.05727	up	FASLG	356	0000122 // negative regulation of transcription from RNA polymerase II promoter // inferred from direct assay /// 0006351 // transcription, DNA-dependent // inferred from electronic annotation /// 0006355 // regulation of transcription, DNA-dependent // inferred from electronic annotation /// 0006915 // apoptotic process // traceable author statement /// 0006915 // apoptotic process // inferred f…	0005576 // extracellular region // traceable author statement /// 0005576 // extracellular region // inferred from electronic annotation /// 0005615 // extracellular space // inferred from direct assay /// 0005615 // extracellular space // inferred from electronic annotation /// 0005634 // nucleus // inferred from direct assay /// 0005634 // nucleus // inferred from electronic annotation /// 0005…	0005102 // receptor binding // traceable author statement /// 0005125 // cytokine activity // inferred from electronic annotation /// 0005164 // tumor necrosis factor receptor binding // inferred from electronic annotation /// 0005515 // protein binding // inferred from physical interaction	chr1:172628147-172636013 (+) // 88.62 // q24.3
11734601_at	0.089818	-0.0627554	0.0317287	-0.0317285	-0.0476491	0.0662355	0.806515	0.69542	1.01676	0.0239778	1.01676	up	TAS2R43 /// TAS2R45	259289 /// 259291	0001580 // detection of chemical stimulus involved in sensory perception of bitter taste // inferred from direct assay /// 0007165 // signal transduction // inferred from electronic annotation /// 0007186 // G-protein coupled receptor signaling pathway // inferred by curator /// 0007186 // G-protein coupled receptor signaling pathway // inferred from electronic annotation /// 0050896 // response …	0005886 // plasma membrane // inferred from electronic annotation /// 0005929 // cilium // inferred from electronic annotation /// 0016020 // membrane // inferred from electronic annotation /// 0016021 // integral to membrane // inferred by curator /// 0016021 // integral to membrane // inferred from electronic annotation /// 0031514 // motile cilium // inferred from direct assay /// 0042995 // c…	0004871 // signal transducer activity // inferred from electronic annotation /// 0004872 // receptor activity // inferred from electronic annotation /// 0004930 // G-protein coupled receptor activity // inferred from electronic annotation /// 0008527 // taste receptor activity // inferred from direct assay /// 0033038 // bitter taste receptor activity // inferred from direct assay	chr12:11243929-11244918 (-) // 82.6 // p13.2
11736569_at	-0.0516272	0.141867	-0.0959952	-0.00445676	0.004457	0.172582	0.701324	0.557453	-1.04207	-0.0594458	1.04207	down	PON1	5444	0006629 // lipid metabolic process // inferred from electronic annotation /// 0008203 // cholesterol metabolic process // inferred from electronic annotation /// 0009605 // response to external stimulus // non-traceable author statement /// 0009636 // response to toxin // inferred from electronic annotation /// 0010875 // positive regulation of cholesterol efflux // inferred from direct assay ///…	0005576 // extracellular region // non-traceable author statement /// 0005576 // extracellular region // inferred from electronic annotation /// 0005615 // extracellular space // inferred from direct assay /// 0005615 // extracellular space // inferred from electronic annotation /// 0005792 // microsome // inferred from electronic annotation /// 0034364 // high-density lipoprotein particle // inf…	0004063 // aryldialkylphosphatase activity // inferred from direct assay /// 0004063 // aryldialkylphosphatase activity // inferred from electronic annotation /// 0004064 // arylesterase activity // inferred from direct assay /// 0004064 // arylesterase activity // non-traceable author statement /// 0004064 // arylesterase activity // inferred from electronic annotation /// 0005509 // calcium ion…	chr7:94926987-94954019 (-) // 93.67 // q21.3
11733011_x_at	-0.134975	-0.0133834	-0.199213	0.0133834	0.128758	0.146317	0.102134	0.0365734	-1.1583	-0.21201	1.1583	down	SLC44A4	80736	0055085 // transmembrane transport // traceable author statement	0005886 // plasma membrane // traceable author statement /// 0016020 // membrane // inferred from electronic annotation /// 0016021 // integral to membrane // inferred from electronic annotation		chr6:31830973-31846823 (-) // 87.5 // p21.33
11752496_a_at	-0.331175	-0.179105	-0.0397482	0.0562439	0.0397487	0.143253	0.115635	0.0432036	-1.20005	-0.263091	1.20005	down	GAS7	8522	0006355 // regulation of transcription, DNA-dependent // traceable author statement /// 0007050 // cell cycle arrest // traceable author statement /// 0007275 // multicellular organismal development // inferred from electronic annotation /// 0007399 // nervous system development // inferred from electronic annotation /// 0008360 // regulation of cell shape // inferred from electronic annotation /…	0001726 // ruffle // inferred from electronic annotation /// 0005737 // cytoplasm // inferred from electronic annotation /// 0005884 // actin filament // inferred from electronic annotation	0003700 // sequence-specific DNA binding transcription factor activity // traceable author statement /// 0051015 // actin filament binding // inferred from electronic annotation	chr17:9819241-9939878 (-) // 99.9 // p13.1
11744093_a_at	-0.198025	-0.258862	-0.147026	0.147026	0.224337	0.175091	0.00570036	0.000626633	-1.30446	-0.383456	1.30446	down	EEF1A2	1917	0006184 // GTP catabolic process // inferred from electronic annotation /// 0006412 // translation // non-traceable author statement /// 0006412 // translation // inferred from electronic annotation /// 0006414 // translational elongation // inferred from electronic annotation /// 0006916 // anti-apoptosis // inferred from electronic annotation /// 0010035 // response to inorganic substance // in…	0005634 // nucleus // inferred from electronic annotation /// 0005737 // cytoplasm // inferred from electronic annotation /// 0005853 // eukaryotic translation elongation factor 1 complex // inferred from electronic annotation /// 0043025 // neuronal cell body // inferred from electronic annotation	0000166 // nucleotide binding // inferred from electronic annotation /// 0003746 // translation elongation factor activity // inferred from electronic annotation /// 0003924 // GTPase activity // inferred from electronic annotation /// 0005525 // GTP binding // inferred from electronic annotation /// 0008135 // translation factor activity, nucleic acid binding // non-traceable author statement	chr20:62119364-62130668 (-) // 86.17 // q13.33
11733928_a_at	-0.362391	-0.193619	-0.292794	0.193619	0.199062	0.359231	0.011863	0.00187641	-1.44751	-0.533572	1.44751	down	ARMC8	25852				chr3:137906147-137965728 (+) // 94.37 // q22.3
11746668_a_at	-0.000411034	0.00236988	0.000411034	0.00351048	-0.0148878	-0.0647945	0.432403	0.269108	1.01831	0.0261806	1.01831	up	ALDH9A1	223	0001822 // kidney development // inferred from electronic annotation /// 0001889 // liver development // inferred from electronic annotation /// 0006081 // cellular aldehyde metabolic process // inferred from direct assay /// 0008152 // metabolic process // inferred from electronic annotation /// 0009437 // carnitine metabolic process // inferred from electronic annotation /// 0034641 // cellular…	0005737 // cytoplasm // inferred from direct assay /// 0005737 // cytoplasm // traceable author statement /// 0005737 // cytoplasm // inferred from electronic annotation /// 0005739 // mitochondrion // inferred from electronic annotation /// 0005829 // cytosol // traceable author statement /// 0005829 // cytosol // inferred from electronic annotation /// 0005886 // plasma membrane // inferred fro…	0004028 // 3-chloroallyl aldehyde dehydrogenase activity // traceable author statement /// 0004029 // aldehyde dehydrogenase (NAD) activity // inferred from direct assay /// 0004029 // aldehyde dehydrogenase (NAD) activity // inferred from electronic annotation /// 0016491 // oxidoreductase activity // inferred from electronic annotation /// 0016620 // oxidoreductase activity, acting on the aldeh…	chr1:165637910-165667823 (-) // 88.96 // q24.1
11727335_a_at	-0.0855045	-0.0586505	-0.047658	0.344921	0.103005	0.047658	0.160735	0.067369	-1.17213	-0.229132	1.17213	down	ACMSD	130013	0006569 // tryptophan catabolic process // traceable author statement /// 0008152 // metabolic process // inferred from electronic annotation /// 0034641 // cellular nitrogen compound metabolic process // traceable author statement /// 0044281 // small molecule metabolic process // traceable author statement /// 0046874 // quinolinate metabolic process // inferred from direct assay	0005829 // cytosol // inferred from direct assay	0001760 // aminocarboxymuconate-semialdehyde decarboxylase activity // inferred from direct assay /// 0001760 // aminocarboxymuconate-semialdehyde decarboxylase activity // inferred from electronic annotation /// 0003824 // catalytic activity // inferred from electronic annotation /// 0016829 // lyase activity // inferred from electronic annotation /// 0016831 // carboxy-lyase activity // inferre…	chr2:135596185-135659645 (+) // 98.38 // q21.3
11737440_a_at	0.437709	0.262639	0.367538	-0.262639	-0.263019	-0.309759	0.00350869	0.000283658	1.55233	0.634434	1.55233	up	BMF	90427	0006915 // apoptotic process // inferred from sequence or structural similarity /// 0006915 // apoptotic process // traceable author statement /// 0006915 // apoptotic process // inferred from electronic annotation /// 0008629 // induction of apoptosis by intracellular signals // traceable author statement /// 0008633 // activation of pro-apoptotic gene products // traceable author statement /// …	0001669 // acrosomal vesicle // inferred from electronic annotation /// 0005737 // cytoplasm // inferred from electronic annotation /// 0005741 // mitochondrial outer membrane // traceable author statement /// 0005829 // cytosol // traceable author statement /// 0005886 // plasma membrane // traceable author statement /// 0015629 // actin cytoskeleton // inferred from electronic annotation /// 00…	0005515 // protein binding // inferred from physical interaction	chr15:40380093-40398649 (-) // 95.53 // q15.1
11723103_x_at	0.0109229	0.265061	0.236312	-0.343889	-0.179982	-0.0109229	0.127811	0.0495176	1.2737	0.34903	1.2737	up	GNB4	59345	0006112 // energy reserve metabolic process // traceable author statement /// 0007165 // signal transduction // inferred from electronic annotation /// 0044281 // small molecule metabolic process // traceable author statement /// 0071377 // cellular response to glucagon stimulus // traceable author statement	0005886 // plasma membrane // traceable author statement	0004871 // signal transducer activity // inferred from electronic annotation	chr3:179113610-179169378 (-) // 82.48 // q26.33
11746836_a_at	-0.121469	-0.17878	0.0819802	0.140407	-0.08198	0.0820289	0.478549	0.311854	-1.08641	-0.119575	1.08641	down	TMEFF2	23671		0005576 // extracellular region // inferred from electronic annotation /// 0016020 // membrane // inferred from electronic annotation /// 0016021 // integral to membrane // non-traceable author statement /// 0016021 // integral to membrane // inferred from electronic annotation		chr2:192813774-193059642 (-) // 97.2 // q32.3
11759529_at	0.00528836	0.136413	-0.0433264	-0.00317287	-0.0473516	0.00317287	0.596341	0.434501	1.03424	0.0485753	1.03424	up	ZC3H15	55854	0019221 // cytokine-mediated signaling pathway // inferred from electronic annotation	0005634 // nucleus // inferred from direct assay /// 0005634 // nucleus // inferred from electronic annotation /// 0005730 // nucleolus // inferred from direct assay /// 0005737 // cytoplasm // inferred from direct assay /// 0005737 // cytoplasm // inferred from electronic annotation	0003676 // nucleic acid binding // inferred from electronic annotation /// 0005515 // protein binding // inferred from physical interaction /// 0008270 // zinc ion binding // inferred from electronic annotation /// 0046872 // metal ion binding // inferred from electronic annotation	chr2:187350884-187374697 (+) // 95.33 // q32.1
11725792_a_at	-0.0531163	-0.121768	-0.231216	0.276434	0.0531158	0.290071	0.0676257	0.0210359	-1.26743	-0.341907	1.26743	down	MRE11A	4361	0000019 // regulation of mitotic recombination // traceable author statement /// 0000075 // cell cycle checkpoint // inferred from electronic annotation /// 0000724 // double-strand break repair via homologous recombination // traceable author statement /// 0006259 // DNA metabolic process // inferred from electronic annotation /// 0006281 // DNA repair // traceable author statement /// 0006281 /…	0000781 // chromosome, telomeric region // inferred from direct assay /// 0000790 // nuclear chromatin // inferred from electronic annotation /// 0000794 // condensed nuclear chromosome // inferred from electronic annotation /// 0005634 // nucleus // inferred from direct assay /// 0005634 // nucleus // inferred from electronic annotation /// 0005634 // nucleus // traceable author statement /// 00…	0000014 // single-stranded DNA specific endodeoxyribonuclease activity // traceable author statement /// 0003677 // DNA binding // inferred from direct assay /// 0003690 // double-stranded DNA binding // traceable author statement /// 0004003 // ATP-dependent DNA helicase activity // inferred from mutant phenotype /// 0004518 // nuclease activity // traceable author statement /// 0004518 // nucle…	chr11:94150170-94227040 (-) // 92.53 // q21
11757741_s_at	-0.18548	-0.306113	-0.206283	0.200125	0.371166	0.18548	0.0137118	0.00231402	-1.39947	-0.484882	1.39947	down	SOX4	6659	0001501 // skeletal system development // inferred from sequence or structural similarity /// 0001501 // skeletal system development // inferred from electronic annotation /// 0001841 // neural tube formation // inferred from sequence or structural similarity /// 0001841 // neural tube formation // inferred from electronic annotation /// 0002328 // pro-B cell differentiation // inferred from sequ…	0005634 // nucleus // inferred from direct assay /// 0005634 // nucleus // inferred from electronic annotation /// 0005730 // nucleolus // inferred from direct assay /// 0005737 // cytoplasm // inferred from direct assay /// 0005739 // mitochondrion // inferred from direct assay	0000976 // transcription regulatory region sequence-specific DNA binding // inferred from sequence or structural similarity /// 0000976 // transcription regulatory region sequence-specific DNA binding // inferred from electronic annotation /// 0001046 // core promoter sequence-specific DNA binding // inferred from direct assay /// 0001046 // core promoter sequence-specific DNA binding // inferred…	chr6:21596716-21597392 (+) // 94.1 // p22.3
11727551_a_at	-0.0943263	-0.140617	0.0476775	-0.0244248	0.0485127	0.024425	0.427134	0.26425	-1.05599	-0.0785929	1.05599	down	ADAMTS10	81794	0006508 // proteolysis // inferred from electronic annotation /// 0007229 // integrin-mediated signaling pathway // inferred from electronic annotation	0001527 // microfibril // inferred from direct assay /// 0005576 // extracellular region // inferred from electronic annotation /// 0005578 // proteinaceous extracellular matrix // inferred from electronic annotation /// 0031012 // extracellular matrix // inferred from direct assay /// 0031012 // extracellular matrix // inferred from electronic annotation	0004222 // metalloendopeptidase activity // inferred from electronic annotation /// 0005515 // protein binding // inferred from physical interaction /// 0008233 // peptidase activity // inferred from electronic annotation /// 0008237 // metallopeptidase activity // inferred from electronic annotation /// 0008270 // zinc ion binding // inferred from electronic annotation /// 0016787 // hydrolase a…	chr19:8645125-8673133 (-) // 97.65 // p13.2
11721902_a_at	0.468185	-0.0964277	0.013948	-0.013948	-0.1198	0.158135	0.705336	0.562185	1.08707	0.120439	1.08707	up	SERPINI1	5274	0007417 // central nervous system development // traceable author statement /// 0007422 // peripheral nervous system development // traceable author statement /// 0010466 // negative regulation of peptidase activity // inferred from electronic annotation /// 0010951 // negative regulation of endopeptidase activity // not recorded /// 0030155 // regulation of cell adhesion // inferred from electro…	0005576 // extracellular region // inferred from electronic annotation	0004867 // serine-type endopeptidase inhibitor activity // not recorded /// 0004867 // serine-type endopeptidase inhibitor activity // inferred from electronic annotation /// 0004867 // serine-type endopeptidase inhibitor activity // traceable author statement /// 0030414 // peptidase inhibitor activity // inferred from electronic annotation	chr3:167453510-167543560 (+) // 99.62 // q26.1
11763571_at	0.024642	-0.0613618	0.167024	0.0952768	-0.024642	-0.108491	0.706105	0.56324	1.03962	0.0560537	1.03962	up	SLC1A7	6512	0006810 // transport // inferred from electronic annotation /// 0006811 // ion transport // traceable author statement /// 0006835 // dicarboxylic acid transport // traceable author statement /// 0006835 // dicarboxylic acid transport // inferred from electronic annotation /// 0015813 // L-glutamate transport // traceable author statement /// 0055085 // transmembrane transport // traceable author…	0005886 // plasma membrane // traceable author statement /// 0016020 // membrane // inferred from electronic annotation /// 0016021 // integral to membrane // non-traceable author statement /// 0016021 // integral to membrane // inferred from electronic annotation	0005313 // L-glutamate transmembrane transporter activity // traceable author statement /// 0015293 // symporter activity // inferred from electronic annotation /// 0017153 // sodium:dicarboxylate symporter activity // inferred from electronic annotation	chr1:53580247-53584281 (+) // 83.97 // p32.3
11746180_a_at	0.409062	0.410997	0.398104	-0.398105	-0.471273	-0.400565	0.000437573	4.41352e-06	1.77691	0.829369	1.77691	up	CD55	1604	0006958 // complement activation, classical pathway // inferred from electronic annotation /// 0007204 // elevation of cytosolic calcium ion concentration // inferred from direct assay /// 0030449 // regulation of complement activation // traceable author statement /// 0045087 // innate immune response // traceable author statement /// 0045087 // innate immune response // inferred from electronic…	0005576 // extracellular region // traceable author statement /// 0005625 // soluble fraction // traceable author statement /// 0005886 // plasma membrane // traceable author statement /// 0005886 // plasma membrane // inferred from electronic annotation /// 0005887 // integral to plasma membrane // traceable author statement /// 0009986 // cell surface // inferred from direct assay /// 0016020 /…	0004872 // receptor activity // inferred from electronic annotation	chr1:207495077-207533846 (+) // 96.56 // q32.2
11759203_a_at	-0.0123787	0.0123787	-0.145409	0.132291	0.139674	-0.065722	0.389987	0.23175	-1.08464	-0.117217	1.08464	down	ZNF223 /// ZNF284	342909 /// 7766	0006351 // transcription, DNA-dependent // inferred from electronic annotation /// 0006355 // regulation of transcription, DNA-dependent // inferred from electronic annotation	0005622 // intracellular // inferred from electronic annotation /// 0005634 // nucleus // inferred from electronic annotation /// 0005634 // nucleus // non-traceable author statement	0003676 // nucleic acid binding // inferred from electronic annotation /// 0003677 // DNA binding // inferred from electronic annotation /// 0003677 // DNA binding // non-traceable author statement /// 0008270 // zinc ion binding // inferred from electronic annotation /// 0046872 // metal ion binding // inferred from electronic annotation	chr19:44556163-44572142 (+) // 79.7 // q13.31
11736723_a_at	0.162905	-0.0459352	-0.00179482	0.042799	0.00179482	-0.023705	0.781267	0.660815	1.02202	0.0314288	1.02202	up	PDLIM7	9260	0001503 // ossification // inferred from electronic annotation /// 0006898 // receptor-mediated endocytosis // traceable author statement /// 0007275 // multicellular organismal development // inferred from electronic annotation /// 0030036 // actin cytoskeleton organization // inferred from electronic annotation /// 0030154 // cell differentiation // inferred from electronic annotation /// 00456…	0001725 // stress fiber // inferred from electronic annotation /// 0001726 // ruffle // inferred from electronic annotation /// 0005737 // cytoplasm // inferred from electronic annotation /// 0005856 // cytoskeleton // inferred from electronic annotation /// 0005925 // focal adhesion // inferred from direct assay /// 0015629 // actin cytoskeleton // inferred from direct assay /// 0030054 // cell …	0005515 // protein binding // inferred from physical interaction /// 0008270 // zinc ion binding // inferred from electronic annotation /// 0046872 // metal ion binding // inferred from electronic annotation	chr5:176910394-176924602 (-) // 100.0 // q35.3
11736662_a_at	0.0126398	-0.186678	-0.0126398	-0.41176	0.187555	0.0317645	0.995693	0.992424	1.00133	0.00192097	1.00133	up	CADPS2	93664	0006810 // transport // inferred from electronic annotation /// 0006887 // exocytosis // inferred from electronic annotation /// 0015031 // protein transport // inferred from electronic annotation /// 0016082 // synaptic vesicle priming // inferred from electronic annotation /// 0045921 // positive regulation of exocytosis // inferred from electronic annotation	0016020 // membrane // inferred from electronic annotation /// 0016023 // cytoplasmic membrane-bounded vesicle // inferred from electronic annotation /// 0030054 // cell junction // inferred from electronic annotation /// 0030659 // cytoplasmic vesicle membrane // inferred from electronic annotation /// 0031410 // cytoplasmic vesicle // inferred from electronic annotation /// 0042734 // presynapt…	0005543 // phospholipid binding // inferred from electronic annotation /// 0008289 // lipid binding // inferred from electronic annotation /// 0046872 // metal ion binding // inferred from electronic annotation	chr7:121958478-122526554 (-) // 97.07 // q31.32
11725019_a_at	-0.12308	0.0295248	-0.07358	0.148595	0.00967526	-0.00967503	0.341623	0.191957	-1.07568	-0.105243	1.07568	down	MST1R	4486	0006468 // protein phosphorylation // inferred from electronic annotation /// 0006928 // cellular component movement // traceable author statement /// 0006952 // defense response // traceable author statement /// 0007165 // signal transduction // traceable author statement /// 0007169 // transmembrane receptor protein tyrosine kinase signaling pathway // inferred from electronic annotation /// 00…	0001725 // stress fiber // inferred from electronic annotation /// 0005886 // plasma membrane // inferred from electronic annotation /// 0005887 // integral to plasma membrane // traceable author statement /// 0016020 // membrane // inferred from electronic annotation /// 0016021 // integral to membrane // inferred from electronic annotation	0000166 // nucleotide binding // inferred from electronic annotation /// 0004672 // protein kinase activity // inferred from electronic annotation /// 0004713 // protein tyrosine kinase activity // inferred from electronic annotation /// 0004714 // transmembrane receptor protein tyrosine kinase activity // inferred from electronic annotation /// 0004872 // receptor activity // inferred from elect…	chr3:49924437-49941306 (-) // 96.95 // p21.31
11727803_at	0.0590277	0.109943	0.02843	-0.056633	-0.02843	-0.092639	0.0507199	0.0143314	1.09053	0.125034	1.09053	up	GJA9-MYCBP /// MYCBP	100527950 /// 26292	0006351 // transcription, DNA-dependent // inferred from electronic annotation /// 0006355 // regulation of transcription, DNA-dependent // inferred from direct assay /// 0006355 // regulation of transcription, DNA-dependent // inferred from electronic annotation /// 0007283 // spermatogenesis // inferred from expression pattern	0005634 // nucleus // inferred from direct assay /// 0005634 // nucleus // inferred from electronic annotation /// 0005737 // cytoplasm // inferred from direct assay /// 0005737 // cytoplasm // inferred from electronic annotation /// 0005739 // mitochondrion // inferred from electronic annotation /// 0005813 // centrosome // inferred from direct assay	0003713 // transcription coactivator activity // inferred from direct assay /// 0005515 // protein binding // inferred from physical interaction	chr1:39328636-39340206 (-) // 88.2 // p34.3
11740937_x_at	-0.0859466	0.0115008	-0.174552	0.0850925	0.0457931	-0.0115008	0.234424	0.11272	-1.08884	-0.122794	1.08884	down	LIAS	11019	0001843 // neural tube closure // inferred from electronic annotation /// 0006954 // inflammatory response // inferred from sequence or structural similarity /// 0006954 // inflammatory response // inferred from electronic annotation /// 0006979 // response to oxidative stress // inferred from sequence or structural similarity /// 0006979 // response to oxidative stress // inferred from electroni…	0005739 // mitochondrion // inferred from sequence or structural similarity /// 0005739 // mitochondrion // inferred from electronic annotation	0003824 // catalytic activity // inferred from electronic annotation /// 0016740 // transferase activity // inferred from electronic annotation /// 0016992 // lipoate synthase activity // inferred from sequence or structural similarity /// 0016992 // lipoate synthase activity // inferred from electronic annotation /// 0046872 // metal ion binding // inferred from electronic annotation /// 0051536…	chr4:39460664-39479269 (+) // 80.02 // p14
11740966_a_at	-0.0647211	-0.0502648	-0.0670524	0.0743718	0.0502648	0.119733	0.014484	0.00249948	-1.10354	-0.142136	1.10354	down	LOC391322	391322				chr22:24373110-24376211 (+) // 93.91 // q11.23
11732166_a_at	-0.0424209	-0.27237	0.037672	0.0907249	-0.0282297	0.0282297	0.448746	0.28352	-1.08871	-0.122615	1.08871	down	LMF1	64788	0006888 // ER to Golgi vesicle-mediated transport // inferred from electronic annotation /// 0009306 // protein secretion // inferred from electronic annotation /// 0033578 // protein glycosylation in Golgi // inferred from electronic annotation /// 0034382 // chylomicron remnant clearance // inferred from electronic annotation /// 0051006 // positive regulation of lipoprotein lipase activity // …	0005783 // endoplasmic reticulum // inferred from electronic annotation /// 0005789 // endoplasmic reticulum membrane // inferred from electronic annotation /// 0005794 // Golgi apparatus // inferred from electronic annotation /// 0016020 // membrane // inferred from electronic annotation /// 0016021 // integral to membrane // inferred from electronic annotation		chr16:903629-1020999 (-) // 98.26 // p13.3
11715128_s_at	-0.116842	0.0482779	0.187073	0.0272779	-0.0272779	-0.0466151	0.716501	0.576247	1.03889	0.0550414	1.03889	up	PCDHGB5	56101	0007155 // cell adhesion // inferred from electronic annotation /// 0007156 // homophilic cell adhesion // inferred from electronic annotation	0005886 // plasma membrane // inferred from electronic annotation /// 0016020 // membrane // inferred from electronic annotation /// 0016021 // integral to membrane // inferred from electronic annotation	0005509 // calcium ion binding // inferred from electronic annotation	chr5:140777694-140780151 (+) // 100.0 // q31.3
11728841_a_at	-0.164221	0.0528164	0.0275335	0.0078783	-0.0078783	-0.0635867	0.95971	0.92957	-1.0047	-0.00676145	1.0047	down	PLEKHA5	54477			0005515 // protein binding // inferred from physical interaction /// 0005543 // phospholipid binding // inferred from electronic annotation /// 0005545 // 1-phosphatidylinositol binding // non-traceable author statement	chr12:19282628-19529334 (+) // 96.91 // p12.3
11724615_at	0.148241	0.0982718	0.120409	-0.0982718	-0.115255	-0.131485	0.00257924	0.00016537	1.17879	0.237311	1.17879	up	LIMK1	3984	0006468 // protein phosphorylation // inferred from direct assay /// 0006468 // protein phosphorylation // non-traceable author statement /// 0006468 // protein phosphorylation // inferred from electronic annotation /// 0006468 // protein phosphorylation // traceable author statement /// 0007165 // signal transduction // traceable author statement /// 0007266 // Rho protein signal transduction //…	0005634 // nucleus // inferred from direct assay /// 0005634 // nucleus // inferred from electronic annotation /// 0005730 // nucleolus // inferred from direct assay /// 0005737 // cytoplasm // inferred from direct assay /// 0005737 // cytoplasm // inferred from electronic annotation /// 0005829 // cytosol // traceable author statement /// 0043005 // neuron projection // inferred from sequence or…	0000166 // nucleotide binding // inferred from electronic annotation /// 0004672 // protein kinase activity // non-traceable author statement /// 0004672 // protein kinase activity // inferred from electronic annotation /// 0004674 // protein serine/threonine kinase activity // traceable author statement /// 0004674 // protein serine/threonine kinase activity // inferred from electronic annotatio…	chr7:73498155-73536855 (+) // 95.33 // q11.23
11723313_s_at	-0.0424604	-0.0733862	-0.0510273	0.151617	0.0424604	0.0517292	0.0625698	0.0189983	-1.10004	-0.13756	1.10004	down	PXMP2	5827		0005737 // cytoplasm // inferred from direct assay /// 0005739 // mitochondrion // inferred from electronic annotation /// 0005777 // peroxisome // inferred from electronic annotation /// 0005778 // peroxisomal membrane // inferred from direct assay /// 0005778 // peroxisomal membrane // inferred from electronic annotation /// 0016020 // membrane // inferred from electronic annotation /// 0016021…	0005515 // protein binding // inferred from physical interaction	chr12:133264125-133281571 (+) // 97.22 // q24.33
11726087_at	-0.134701	0.0984318	-0.338945	0.143677	-0.0017159	0.00171566	0.433106	0.269736	-1.12737	-0.172964	1.12737	down	HSPB3	8988	0006950 // response to stress // inferred from electronic annotation /// 0006986 // response to unfolded protein // traceable author statement /// 0008219 // cell death // inferred from electronic annotation	0005634 // nucleus // inferred from direct assay /// 0005634 // nucleus // inferred from electronic annotation /// 0005737 // cytoplasm // inferred from direct assay /// 0005737 // cytoplasm // inferred from electronic annotation		chr5:53751430-53752207 (+) // 98.73 // q11.2
11723247_a_at	-0.016974	-0.0699186	0.0641103	-0.0156455	0.0727935	0.0156455	0.680814	0.533322	-1.02233	-0.0318587	1.02233	down	SFRP1	6422	0001649 // osteoblast differentiation // inferred from expression pattern /// 0001649 // osteoblast differentiation // inferred from electronic annotation /// 0001657 // ureteric bud development // inferred from electronic annotation /// 0001756 // somitogenesis // inferred from electronic annotation /// 0001843 // neural tube closure // inferred from electronic annotation /// 0001944 // vasculat…	0005576 // extracellular region // inferred from electronic annotation /// 0005578 // proteinaceous extracellular matrix // inferred from direct assay /// 0005615 // extracellular space // inferred from direct assay /// 0005622 // intracellular // inferred from direct assay /// 0005829 // cytosol // inferred from direct assay /// 0005886 // plasma membrane // not recorded /// 0005886 // plasma me…	0004197 // cysteine-type endopeptidase activity // inferred from mutant phenotype /// 0005109 // frizzled binding // inferred from physical interaction /// 0008144 // drug binding // inferred from direct assay /// 0008201 // heparin binding // inferred from direct assay /// 0017147 // Wnt-protein binding // inferred from physical interaction /// 0017147 // Wnt-protein binding // inferred from ele…	chr8:41119477-41166990 (-) // 97.65 // p11.21
11745412_s_at	-0.0158615	0.0158615	-0.0879893	0.32453	0.0820236	-0.0317755	0.38981	0.231592	-1.11285	-0.154256	1.11285	down	LOC441178	441178				chr6:168083767-168084736 (-) // 99.38 // q27
11757242_x_at	-0.206595	-0.03158	-0.0765605	0.03158	0.0324903	0.228229	0.170867	0.0732969	-1.15057	-0.202345	1.15057	down	LOC339240	339240		0005576 // extracellular region // inferred from electronic annotation		chr17:18325494-18328647 (+) // 80.24 // p11.2 /// chr17:20422385-20425541 (-) // 82.71 // p11.2 /// chr17:16750714-16753867 (-) // 73.04 // p11.2
11744034_a_at	0.25374	0.128228	0.208149	-0.128228	-0.187669	-0.184232	0.00733566	0.000931535	1.28647	0.363415	1.28647	up	VASP	7408	0001843 // neural tube closure // inferred from electronic annotation /// 0007411 // axon guidance // traceable author statement /// 0007411 // axon guidance // inferred from electronic annotation /// 0008154 // actin polymerization or depolymerization // inferred from electronic annotation /// 0030036 // actin cytoskeleton organization // inferred from electronic annotation /// 0034329 // cell j…	0005737 // cytoplasm // inferred from direct assay /// 0005737 // cytoplasm // inferred from electronic annotation /// 0005829 // cytosol // traceable author statement /// 0005856 // cytoskeleton // inferred from electronic annotation /// 0005886 // plasma membrane // inferred from direct assay /// 0005886 // plasma membrane // inferred from electronic annotation /// 0005925 // focal adhesion // …	0003779 // actin binding // inferred from electronic annotation /// 0005515 // protein binding // inferred from physical interaction /// 0005522 // profilin binding // inferred from physical interaction /// 0017124 // SH3 domain binding // inferred from electronic annotation	chr19:46010694-46030241 (+) // 89.99 // q13.32
11741280_s_at	0.0492172	-0.103367	-0.0894327	-0.0469236	0.100266	0.0469236	0.443765	0.279186	-1.05796	-0.0812829	1.05796	down	CASC1	55259		0005881 // cytoplasmic microtubule // inferred from electronic annotation	0008017 // microtubule binding // inferred from electronic annotation /// 0048487 // beta-tubulin binding // inferred from electronic annotation	chr12:25261223-25348094 (-) // 99.41 // p12.1
11757313_s_at	-0.0775652	-0.0643292	-0.184537	0.0643287	0.189892	0.0868812	0.0520196	0.0148239	-1.16676	-0.222511	1.16676	down	VAT1	10493	0010637 // negative regulation of mitochondrial fusion // inferred from mutant phenotype /// 0016049 // cell growth // non-traceable author statement /// 0055114 // oxidation-reduction process // inferred from electronic annotation	0005634 // nucleus // non-traceable author statement /// 0005737 // cytoplasm // inferred from electronic annotation /// 0005739 // mitochondrion // inferred from electronic annotation /// 0005741 // mitochondrial outer membrane // inferred from electronic annotation /// 0016020 // membrane // inferred from electronic annotation /// 0016021 // integral to membrane // traceable author statement	0000166 // nucleotide binding // inferred from electronic annotation /// 0003677 // DNA binding // non-traceable author statement /// 0008270 // zinc ion binding // inferred from electronic annotation /// 0016491 // oxidoreductase activity // inferred from electronic annotation	chr17:41166623-41167974 (-) // 92.54 // q21.31
11727264_at	-0.0665212	-0.0479436	0.00740194	0.048101	-0.00740242	0.0144968	0.245309	0.120114	-1.0382	-0.0540861	1.0382	down	LRRC8E	80131		0016020 // membrane // inferred from electronic annotation /// 0016021 // integral to membrane // inferred from electronic annotation		chr19:7953389-7966901 (+) // 85.61 // p13.2
11751320_a_at	-0.146279	-0.135088	0.0460739	0.0366154	-0.0366149	0.0460734	0.396706	0.237559	-1.06717	-0.0937889	1.06717	down	POLL	27343	0006260 // DNA replication // non-traceable author statement /// 0006260 // DNA replication // inferred from electronic annotation /// 0006281 // DNA repair // inferred from electronic annotation /// 0006289 // nucleotide-excision repair // inferred from direct assay /// 0006974 // response to DNA damage stimulus // inferred from electronic annotation /// 0016446 // somatic hypermutation of immun…	0005622 // intracellular // inferred from electronic annotation /// 0005634 // nucleus // non-traceable author statement /// 0005634 // nucleus // inferred from electronic annotation	0003677 // DNA binding // inferred from electronic annotation /// 0003677 // DNA binding // non-traceable author statement /// 0003824 // catalytic activity // inferred from electronic annotation /// 0003887 // DNA-directed DNA polymerase activity // inferred from electronic annotation /// 0003887 // DNA-directed DNA polymerase activity // non-traceable author statement /// 0016740 // transferase…	chr10:103338990-103348006 (-) // 99.86 // q24.32
11722091_a_at	-0.105645	-0.0539761	-0.00673294	0.023087	0.00673294	0.152439	0.213178	0.0987282	-1.08388	-0.116204	1.08388	down	PRR5	55615	0007049 // cell cycle // inferred from electronic annotation /// 0007165 // signal transduction // inferred from electronic annotation /// 0007264 // small GTPase mediated signal transduction // traceable author statement /// 0030036 // actin cytoskeleton organization // inferred from direct assay /// 0030335 // positive regulation of cell migration // inferred from direct assay /// 0032321 // po…	0005622 // intracellular // inferred from electronic annotation /// 0005829 // cytosol // traceable author statement	0005096 // GTPase activator activity // inferred from electronic annotation /// 0005096 // GTPase activator activity // inferred from direct assay /// 0005100 // Rho GTPase activator activity // inferred from direct assay /// 0005515 // protein binding // inferred from physical interaction	chr22:45072687-45133561 (+) // 97.79 // q13.31
11718474_a_at	-0.225626	-0.199932	-0.211793	0.228218	0.199932	0.245255	0.000567376	8.62637e-06	-1.35371	-0.436918	1.35371	down	IDH1	3417	0006097 // glyoxylate cycle // inferred from electronic annotation /// 0006099 // tricarboxylic acid cycle // inferred from electronic annotation /// 0006102 // isocitrate metabolic process // inferred from direct assay /// 0006102 // isocitrate metabolic process // inferred from electronic annotation /// 0006103 // 2-oxoglutarate metabolic process // inferred from direct assay /// 0006103 // 2-o…	0005737 // cytoplasm // inferred from direct assay /// 0005737 // cytoplasm // inferred from electronic annotation /// 0005739 // mitochondrion // inferred from electronic annotation /// 0005777 // peroxisome // inferred from direct assay /// 0005777 // peroxisome // inferred from electronic annotation /// 0005782 // peroxisomal matrix // traceable author statement /// 0005829 // cytosol // infer…	0000287 // magnesium ion binding // inferred from direct assay /// 0000287 // magnesium ion binding // inferred from electronic annotation /// 0004450 // isocitrate dehydrogenase (NADP+) activity // not recorded /// 0004450 // isocitrate dehydrogenase (NADP+) activity // inferred from direct assay /// 0004450 // isocitrate dehydrogenase (NADP+) activity // inferred from electronic annotation /// …	chr2:209100952-209120522 (-) // 92.68 // q34
11745815_x_at	-0.0557008	-0.0658822	-0.0496268	0.0854392	0.233714	0.0496273	0.0956255	0.0334388	-1.13288	-0.179997	1.13288	down	C16orf5	29965	0006915 // apoptotic process // inferred from genetic interaction /// 0006917 // induction of apoptosis // inferred from direct assay /// 0033209 // tumor necrosis factor-mediated signaling pathway // inferred from genetic interaction /// 0042771 // DNA damage response, signal transduction by p53 class mediator resulting in induction of apoptosis // inferred from mutant phenotype	0005634 // nucleus // inferred from direct assay /// 0005634 // nucleus // non-traceable author statement		chr16:4560706-4565107 (-) // 95.22 // p13.3
11717432_a_at	-0.170759	0.102374	-0.0611477	0.102937	0.0451784	-0.0451784	0.600617	0.439224	-1.05518	-0.0774899	1.05518	down	ECHDC1	55862	0008152 // metabolic process // inferred from electronic annotation	0005737 // cytoplasm // inferred from electronic annotation /// 0005829 // cytosol // inferred from sequence or structural similarity /// 0005829 // cytosol // inferred from electronic annotation	0003824 // catalytic activity // inferred from electronic annotation /// 0004492 // methylmalonyl-CoA decarboxylase activity // inferred from electronic annotation /// 0016829 // lyase activity // inferred from electronic annotation /// 0016831 // carboxy-lyase activity // inferred from sequence or structural similarity /// 0016831 // carboxy-lyase activity // inferred from electronic annotation …	chr6:127609856-127665037 (-) // 98.5 // q22.33
11720731_a_at	0.144381	0.112001	-0.00270462	-0.0176525	0.00270462	-0.0857153	0.192044	0.0856666	1.08531	0.118113	1.08531	up	SUMF1	285362	0055114 // oxidation-reduction process // inferred from electronic annotation	0005783 // endoplasmic reticulum // inferred from electronic annotation /// 0005788 // endoplasmic reticulum lumen // inferred from electronic annotation	0016491 // oxidoreductase activity // inferred from electronic annotation /// 0042803 // protein homodimerization activity // inferred from electronic annotation /// 0046872 // metal ion binding // inferred from electronic annotation	chr3:4402829-4508954 (-) // 90.13 // p26.1
11741989_a_at	0.00686645	0.111884	0.173707	-0.0580735	-0.0637455	-0.00686645	0.136378	0.0539659	1.1022	0.140381	1.1022	up	P2RX2	22953	0006810 // transport // inferred from electronic annotation /// 0006811 // ion transport // inferred from electronic annotation /// 0006812 // cation transport // not recorded /// 0010524 // positive regulation of calcium ion transport into cytosol // non-traceable author statement /// 0035590 // purinergic nucleotide receptor signaling pathway // not recorded /// 0035590 // purinergic nucleotide…	0016020 // membrane // not recorded /// 0016020 // membrane // inferred from electronic annotation /// 0016021 // integral to membrane // inferred from electronic annotation	0001614 // purinergic nucleotide receptor activity // not recorded /// 0001614 // purinergic nucleotide receptor activity // non-traceable author statement /// 0004872 // receptor activity // inferred from electronic annotation /// 0004931 // extracellular ATP-gated cation channel activity // not recorded /// 0004931 // extracellular ATP-gated cation channel activity // non-traceable author state…	chr12:133195402-133198972 (+) // 96.32 // q24.33
11741321_a_at	0.266509	0.316935	0.266494	-0.46377	-0.281366	-0.266494	0.00609556	0.000697348	1.53743	0.620523	1.53743	up	CREM	1390	0006006 // glucose metabolic process // inferred from electronic annotation /// 0006351 // transcription, DNA-dependent // inferred from electronic annotation /// 0006355 // regulation of transcription, DNA-dependent // inferred from direct assay /// 0006355 // regulation of transcription, DNA-dependent // non-traceable author statement /// 0006355 // regulation of transcription, DNA-dependent //…	0005634 // nucleus // inferred from electronic annotation /// 0005634 // nucleus // non-traceable author statement /// 0005634 // nucleus // traceable author statement /// 0005667 // transcription factor complex // inferred from electronic annotation	0003677 // DNA binding // non-traceable author statement /// 0003677 // DNA binding // inferred from electronic annotation /// 0003700 // sequence-specific DNA binding transcription factor activity // inferred from electronic annotation /// 0005515 // protein binding // inferred from physical interaction /// 0008140 // cAMP response element binding protein binding // non-traceable author statemen…	chr10:35484829-35501885 (+) // 99.52 // p11.21
11753889_a_at	-0.0408792	-0.0273285	-0.136772	0.0273285	0.167271	0.0560522	0.129441	0.0503611	-1.11101	-0.151877	1.11101	down	STAT6	6778	0000122 // negative regulation of transcription from RNA polymerase II promoter // inferred from electronic annotation /// 0002296 // T-helper 1 cell lineage commitment // inferred from electronic annotation /// 0002829 // negative regulation of type 2 immune response // inferred from electronic annotation /// 0006351 // transcription, DNA-dependent // inferred from electronic annotation /// 0006…	0000790 // nuclear chromatin // inferred from electronic annotation /// 0005634 // nucleus // inferred from direct assay /// 0005634 // nucleus // inferred from electronic annotation /// 0005730 // nucleolus // inferred from direct assay /// 0005737 // cytoplasm // inferred from direct assay /// 0005737 // cytoplasm // inferred from electronic annotation /// 0005829 // cytosol // traceable author…	0003677 // DNA binding // inferred from electronic annotation /// 0003700 // sequence-specific DNA binding transcription factor activity // inferred from electronic annotation /// 0003700 // sequence-specific DNA binding transcription factor activity // traceable author statement /// 0004871 // signal transducer activity // inferred from electronic annotation /// 0005509 // calcium ion binding //…	chr12:57501945-57502061 (-) // 99.15 // q13.3
11735141_at	0.0851586	0.033694	0.0309801	-0.273466	-0.127694	-0.0309801	0.139651	0.0557848	1.14392	0.193991	1.14392	up	SORCS3	22986	0007218 // neuropeptide signaling pathway // non-traceable author statement /// 0048011 // nerve growth factor receptor signaling pathway // traceable author statement	0005886 // plasma membrane // traceable author statement /// 0016020 // membrane // non-traceable author statement /// 0016020 // membrane // inferred from electronic annotation /// 0016021 // integral to membrane // inferred from electronic annotation	0004872 // receptor activity // inferred from electronic annotation /// 0008188 // neuropeptide receptor activity // non-traceable author statement	chr10:106400858-107024999 (+) // 99.71 // q25.1
11756090_s_at	-0.319332	-0.119225	-0.162051	0.119225	0.130293	0.191586	0.0264036	0.00587222	-1.27212	-0.347237	1.27212	down	ZHX1	11244	0000122 // negative regulation of transcription from RNA polymerase II promoter // inferred from direct assay /// 0006351 // transcription, DNA-dependent // inferred from electronic annotation /// 0006355 // regulation of transcription, DNA-dependent // inferred from electronic annotation /// 0030154 // cell differentiation // inferred from electronic annotation /// 0045892 // negative regulation…	0005622 // intracellular // inferred from electronic annotation /// 0005634 // nucleus // inferred from direct assay /// 0005634 // nucleus // inferred from electronic annotation	0003677 // DNA binding // inferred from electronic annotation /// 0003700 // sequence-specific DNA binding transcription factor activity // inferred from direct assay /// 0003700 // sequence-specific DNA binding transcription factor activity // inferred from electronic annotation /// 0003714 // transcription corepressor activity // inferred from direct assay /// 0005515 // protein binding // infe…	chr14:63763014-63764134 (+) // 49.18 // q23.2
11740919_a_at	-0.0176525	0.029562	-0.127568	-0.116709	0.0176525	0.11216	0.754557	0.62462	-1.0302	-0.0429208	1.0302	down	RSPO1	284654	0002090 // regulation of receptor internalization // inferred from direct assay /// 0016055 // Wnt receptor signaling pathway // inferred from electronic annotation /// 0030177 // positive regulation of Wnt receptor signaling pathway // inferred from direct assay /// 0050896 // response to stimulus // inferred from electronic annotation /// 0060070 // canonical Wnt receptor signaling pathway // i…	0005576 // extracellular region // inferred from electronic annotation /// 0005615 // extracellular space // inferred from electronic annotation /// 0005634 // nucleus // inferred from electronic annotation	0005102 // receptor binding // inferred from electronic annotation /// 0005515 // protein binding // inferred from physical interaction /// 0008201 // heparin binding // inferred from electronic annotation	chr1:38076950-38100491 (-) // 84.99 // p34.3
11730501_a_at	0.00646448	-0.00646448	0.113078	0.0850377	-0.0986195	-0.185717	0.470214	0.303814	1.07484	0.104126	1.07484	up	CACNA2D3	55799	0006810 // transport // inferred from electronic annotation /// 0006811 // ion transport // inferred from electronic annotation /// 0006816 // calcium ion transport // inferred from electronic annotation /// 0034765 // regulation of ion transmembrane transport // inferred from electronic annotation /// 0051925 // regulation of calcium ion transport via voltage-gated calcium channel activity // in…	0016020 // membrane // inferred from electronic annotation /// 0016021 // integral to membrane // inferred from electronic annotation	0005216 // ion channel activity // inferred from electronic annotation /// 0005244 // voltage-gated ion channel activity // inferred from electronic annotation /// 0005245 // voltage-gated calcium channel activity // inferred from electronic annotation /// 0005262 // calcium channel activity // inferred from electronic annotation /// 0046872 // metal ion binding // inferred from electronic annota…	chr3:54156650-55108582 (+) // 97.56 // p21.1
11743248_at	0.196512	-0.126177	-0.147488	-0.07832	0.165048	0.07832	0.714957	0.574178	-1.05756	-0.0807338	1.05756	down	ONECUT3	390874	0006351 // transcription, DNA-dependent // inferred from electronic annotation /// 0006355 // regulation of transcription, DNA-dependent // inferred from electronic annotation /// 0006357 // regulation of transcription from RNA polymerase II promoter // inferred from electronic annotation /// 0031018 // endocrine pancreas development // traceable author statement	0005634 // nucleus // inferred from electronic annotation /// 0005667 // transcription factor complex // inferred from electronic annotation	0003677 // DNA binding // inferred from electronic annotation /// 0003700 // sequence-specific DNA binding transcription factor activity // inferred from electronic annotation /// 0043565 // sequence-specific DNA binding // inferred from electronic annotation	chr19:1753661-1775602 (+) // 63.32 // p13.3
11761537_at	0.118387	-0.362632	0.0951381	-0.000548601	-0.123563	0.00054884	0.977617	0.960587	-1.00592	-0.00851462	1.00592	down	TM2D3	80213		0016020 // membrane // inferred from electronic annotation /// 0016021 // integral to membrane // inferred from electronic annotation		chr15:102173275-102192579 (-) // 53.12 // q26.3
11745685_a_at	0.0857587	-0.0259414	0.00769711	0.0185485	-0.0352092	-0.00769711	0.609491	0.449176	1.02145	0.030624	1.02145	up	SCLT1	132320	0045162 // clustering of voltage-gated sodium channels // inferred from electronic annotation	0005737 // cytoplasm // inferred from direct assay /// 0005737 // cytoplasm // inferred from electronic annotation /// 0005813 // centrosome // inferred from direct assay /// 0005886 // plasma membrane // inferred from electronic annotation /// 0045111 // intermediate filament cytoskeleton // inferred from direct assay	0017080 // sodium channel regulator activity // inferred from electronic annotation	chr4:129805500-130014567 (-) // 99.93 // q28.2
11764008_at	-0.0394108	-0.068491	-0.00359583	0.114444	0.192008	0.00359607	0.168596	0.0719098	-1.1023	-0.140515	1.1023	down						chr9:121450030-121468238 (-) // 43.26 // q33.1
11731749_at	-0.160771	-0.0555224	0.0459471	0.0429168	-0.000862598	0.000863075	0.477878	0.311172	-1.05051	-0.071088	1.05051	down	SNX32	254122	0006810 // transport // inferred from electronic annotation /// 0007154 // cell communication // inferred from electronic annotation /// 0015031 // protein transport // inferred from electronic annotation		0035091 // phosphatidylinositol binding // inferred from electronic annotation	chr11:65601409-65621172 (+) // 95.15 // q13.1
11719543_a_at	-0.526081	0.137095	-0.00197554	-0.080153	0.10348	0.00197554	0.688832	0.542662	-1.10095	-0.138755	1.10095	down	C3orf18	51161		0016020 // membrane // inferred from electronic annotation /// 0016021 // integral to membrane // inferred from electronic annotation		chr3:50595461-50605199 (-) // 95.98 // p21.31
11756854_a_at	-0.138069	-0.317886	-0.2755	0.176953	0.151536	0.138069	0.0122616	0.00197119	-1.3189	-0.399338	1.3189	down	EHBP1	23301		0005737 // cytoplasm // inferred from direct assay /// 0005737 // cytoplasm // inferred from electronic annotation /// 0016020 // membrane // inferred from electronic annotation		chr2:63192096-63272798 (+) // 100.0 // p15
11749575_at	-0.0270123	-0.0166035	-0.00559235	0.00559235	0.0591245	0.0151463	0.166873	0.0709247	-1.03027	-0.0430238	1.03027	down	LOC100287329	100287329				chr6:31527069-31540480 (-) // 96.53 // p21.33
11717457_a_at	-0.119632	-0.096714	-0.165373	0.110712	0.096714	0.157504	0.00666876	0.000802763	-1.18829	-0.248883	1.18829	down	NLGN2	57555	0007155 // cell adhesion // inferred from electronic annotation /// 0007158 // neuron cell-cell adhesion // inferred from sequence or structural similarity /// 0007416 // synapse assembly // not recorded /// 0007416 // synapse assembly // inferred from sequence or structural similarity /// 0007416 // synapse assembly // non-traceable author statement /// 0016337 // cell-cell adhesion // non-trace…	0005886 // plasma membrane // inferred from electronic annotation /// 0005887 // integral to plasma membrane // not recorded /// 0005887 // integral to plasma membrane // inferred from sequence or structural similarity /// 0009986 // cell surface // not recorded /// 0009986 // cell surface // inferred from sequence or structural similarity /// 0016020 // membrane // non-traceable author statement…	0004091 // carboxylesterase activity // not recorded /// 0004872 // receptor activity // not recorded /// 0042043 // neurexin family protein binding // not recorded /// 0042043 // neurexin family protein binding // inferred from sequence or structural similarity /// 0042043 // neurexin family protein binding // non-traceable author statement /// 0050839 // cell adhesion molecule binding // inferr…	chr17:7311501-7323179 (+) // 94.41 // p13.1
11735338_at	0.030436	0.0364866	-0.0304356	-0.0900345	-0.0859275	0.0447783	0.48603	0.319041	1.0395	0.0558903	1.0395	up	LINC00482	284185				chr17:79276623-79283053 (-) // 77.12 // q25.3
11716992_at	-0.0505366	-0.118591	0.0312142	0.00137568	0.00961542	-0.00137568	0.487796	0.320789	-1.03467	-0.0491762	1.03467	down	CIC	23152	0006351 // transcription, DNA-dependent // inferred from electronic annotation /// 0006355 // regulation of transcription, DNA-dependent // inferred from electronic annotation	0005634 // nucleus // inferred from electronic annotation	0003677 // DNA binding // inferred from electronic annotation /// 0005515 // protein binding // inferred from physical interaction	chr19:42788816-42799948 (+) // 95.51 // q13.2
11738637_a_at	-0.00804996	-0.0662813	-0.0493259	0.00804996	0.0471506	0.0169849	0.100272	0.0356665	-1.04629	-0.0652809	1.04629	down	CTBP1	1487	0000122 // negative regulation of transcription from RNA polymerase II promoter // inferred from direct assay /// 0000122 // negative regulation of transcription from RNA polymerase II promoter // inferred from mutant phenotype /// 0000122 // negative regulation of transcription from RNA polymerase II promoter // inferred from electronic annotation /// 0006351 // transcription, DNA-dependent // i…	0005634 // nucleus // inferred from direct assay /// 0005634 // nucleus // inferred from sequence or structural similarity /// 0005634 // nucleus // inferred from electronic annotation /// 0005667 // transcription factor complex // inferred from electronic annotation /// 0005730 // nucleolus // inferred from direct assay /// 0005737 // cytoplasm // inferred from electronic annotation /// 0017053 …	0000166 // nucleotide binding // inferred from electronic annotation /// 0001106 // RNA polymerase II transcription corepressor activity // inferred from direct assay /// 0003700 // sequence-specific DNA binding transcription factor activity // inferred from electronic annotation /// 0005515 // protein binding // inferred from physical interaction /// 0008022 // protein C-terminus binding // trac…	chr4:1205232-1242914 (-) // 90.98 // p16.3
11720930_s_at	0.00412083	-0.0928097	-0.0785613	0.293808	0.00346613	-0.00346565	0.361642	0.208192	-1.11241	-0.153686	1.11241	down	DLST	1743	0006091 // generation of precursor metabolites and energy // traceable author statement /// 0006099 // tricarboxylic acid cycle // traceable author statement /// 0006099 // tricarboxylic acid cycle // inferred from electronic annotation /// 0006103 // 2-oxoglutarate metabolic process // inferred from electronic annotation /// 0006554 // lysine catabolic process // traceable author statement /// 0…	0005634 // nucleus // inferred from direct assay /// 0005737 // cytoplasm // inferred from direct assay /// 0005739 // mitochondrion // inferred from direct assay /// 0005739 // mitochondrion // inferred from electronic annotation /// 0005759 // mitochondrial matrix // traceable author statement /// 0005792 // microsome // inferred from electronic annotation /// 0005886 // plasma membrane // infe…	0004149 // dihydrolipoyllysine-residue succinyltransferase activity // inferred from electronic annotation /// 0016740 // transferase activity // inferred from electronic annotation /// 0016746 // transferase activity, transferring acyl groups // inferred from electronic annotation /// 0031072 // heat shock protein binding // inferred from electronic annotation /// 0051087 // chaperone binding //…	chr14:75348595-75370443 (+) // 98.64 // q24.3
11723309_at	0.119112	-0.0169721	-0.0993366	-0.287001	0.0169721	0.0429301	0.710555	0.568799	1.05455	0.0766341	1.05455	up	TNFRSF10D	8793	0006915 // apoptotic process // inferred from electronic annotation /// 0006916 // anti-apoptosis // traceable author statement /// 0007165 // signal transduction // traceable author statement	0016020 // membrane // inferred from electronic annotation /// 0016021 // integral to membrane // inferred from electronic annotation	0004872 // receptor activity // inferred from electronic annotation /// 0004888 // transmembrane signaling receptor activity // traceable author statement /// 0045569 // TRAIL binding // inferred from electronic annotation	chr8:22993100-23021543 (-) // 89.17 // p21.3
11733872_x_at	-0.202484	-0.120978	-0.203139	0.157309	0.146175	0.120978	0.00439511	0.000414975	-1.24576	-0.317021	1.24576	down	LOC100652805 /// LOC100653302 /// PGK1	100652805 /// 100653302 /// 5230	0005975 // carbohydrate metabolic process // traceable author statement /// 0006006 // glucose metabolic process // traceable author statement /// 0006094 // gluconeogenesis // traceable author statement /// 0006096 // glycolysis // inferred from electronic annotation /// 0006096 // glycolysis // traceable author statement /// 0016310 // phosphorylation // inferred from sequence or structural sim…	0005737 // cytoplasm // inferred from electronic annotation /// 0005829 // cytosol // traceable author statement	0000166 // nucleotide binding // inferred from electronic annotation /// 0004618 // phosphoglycerate kinase activity // not recorded /// 0004618 // phosphoglycerate kinase activity // inferred from sequence or structural similarity /// 0004618 // phosphoglycerate kinase activity // inferred from electronic annotation /// 0004618 // phosphoglycerate kinase activity // traceable author statement //…	chrX:77359665-77382323 (+) // 82.0 // q21.1
11752991_at	0.0735695	-0.0278111	0.0526741	-0.105545	-0.0781667	0.0278111	0.316685	0.172284	1.06052	0.0847779	1.06052	up	HSP90B3P	343477	0006457 // protein folding // inferred from electronic annotation /// 0006950 // response to stress // inferred from electronic annotation		0005524 // ATP binding // inferred from electronic annotation /// 0051082 // unfolded protein binding // inferred from electronic annotation	chr1:92100567-92109335 (+) // 94.13 // p22.1
11758326_s_at	-0.0939589	0.0423918	-0.0520501	-0.0209131	0.0762186	0.0209131	0.455573	0.289724	-1.04243	-0.0599453	1.04243	down	THEM4	117145	0007173 // epidermal growth factor receptor signaling pathway // traceable author statement /// 0008286 // insulin receptor signaling pathway // traceable author statement /// 0008543 // fibroblast growth factor receptor signaling pathway // traceable author statement /// 0048011 // nerve growth factor receptor signaling pathway // traceable author statement /// 0048015 // phosphatidylinositol-me…	0005737 // cytoplasm // inferred from electronic annotation /// 0005739 // mitochondrion // inferred from electronic annotation /// 0005829 // cytosol // traceable author statement /// 0005886 // plasma membrane // traceable author statement /// 0005886 // plasma membrane // inferred from electronic annotation /// 0016020 // membrane // inferred from electronic annotation /// 0032587 // ruffle me…		chr1:151849535-151881964 (-) // 98.49 // q21.3 /// chr15:55734929-55735594 (-) // 94.86 // q21.3
11724297_a_at	-0.0531387	-0.0448098	0.0869431	0.108338	-0.0332413	0.0332413	0.695371	0.550384	-1.02796	-0.039781	1.02796	down	BMP7	655	0001501 // skeletal system development // traceable author statement /// 0001503 // ossification // inferred from electronic annotation /// 0001654 // eye development // inferred from electronic annotation /// 0001656 // metanephros development // inferred from expression pattern /// 0001657 // ureteric bud development // inferred from sequence or structural similarity /// 0001657 // ureteric bud…	0005576 // extracellular region // inferred from electronic annotation /// 0005615 // extracellular space // inferred from direct assay /// 0005615 // extracellular space // inferred from electronic annotation	0005125 // cytokine activity // inferred from electronic annotation /// 0005515 // protein binding // inferred from physical interaction /// 0008083 // growth factor activity // inferred from electronic annotation	chr20:55743808-55841708 (-) // 89.56 // q13.31
11721212_a_at	0.00286508	-0.00286508	-0.0258942	-0.0503573	0.137425	0.051923	0.540006	0.374099	-1.03883	-0.0549616	1.03883	down	THBS4	7060	0001938 // positive regulation of endothelial cell proliferation // inferred from direct assay /// 0007155 // cell adhesion // inferred from electronic annotation /// 0007399 // nervous system development // inferred from electronic annotation /// 0016525 // negative regulation of angiogenesis // inferred from expression pattern /// 0048812 // neuron projection morphogenesis // inferred from elec…	0005576 // extracellular region // traceable author statement /// 0005576 // extracellular region // inferred from electronic annotation /// 0005578 // proteinaceous extracellular matrix // inferred from electronic annotation /// 0005604 // basement membrane // inferred from direct assay /// 0005615 // extracellular space // inferred from direct assay /// 0031594 // neuromuscular junction // infe…	0001968 // fibronectin binding // inferred from electronic annotation /// 0005178 // integrin binding // inferred from direct assay /// 0005509 // calcium ion binding // inferred from direct assay /// 0005509 // calcium ion binding // inferred from electronic annotation /// 0005518 // collagen binding // inferred from electronic annotation /// 0008083 // growth factor activity // inferred from el…	chr5:79330990-79379110 (+) // 98.43 // q14.1
11735472_a_at	-0.246192	-0.0508842	-0.0101519	0.12514	0.0101519	0.230487	0.184737	0.081188	-1.16824	-0.224335	1.16824	down	CCDC169 /// CCDC169-SOHLH2 /// SOHLH2	100526761 /// 54937 /// 728591	0006351 // transcription, DNA-dependent // inferred from electronic annotation /// 0006355 // regulation of transcription, DNA-dependent // inferred from electronic annotation /// 0007275 // multicellular organismal development // inferred from electronic annotation /// 0007283 // spermatogenesis // inferred from electronic annotation /// 0030154 // cell differentiation // inferred from electroni…	0005634 // nucleus // inferred from electronic annotation	0003677 // DNA binding // inferred from electronic annotation	chr13:36804911-36871992 (-) // 100.0 // q13.3
11715686_s_at	0.115943	0.0960074	0.0914316	-0.13058	-0.121929	-0.0914316	0.00200502	0.000105078	1.16133	0.215774	1.16133	up	ARPC5	10092	0006928 // cellular component movement // traceable author statement /// 0030036 // actin cytoskeleton organization // traceable author statement /// 0030833 // regulation of actin filament polymerization // inferred from electronic annotation	0005737 // cytoplasm // inferred from electronic annotation /// 0005737 // cytoplasm // traceable author statement /// 0005856 // cytoskeleton // inferred from electronic annotation /// 0005885 // Arp2/3 protein complex // traceable author statement /// 0015629 // actin cytoskeleton // traceable author statement /// 0042995 // cell projection // inferred from electronic annotation	0003779 // actin binding // inferred from electronic annotation /// 0005200 // structural constituent of cytoskeleton // traceable author statement /// 0005515 // protein binding // inferred from physical interaction	chr1:183595327-183605076 (-) // 91.38 // q25.3
11753825_x_at	0.0891485	0.0332603	-0.0332603	-0.320071	-0.104257	0.121387	0.54462	0.379035	1.09482	0.130696	1.09482	up	FKBP1A	2280	0000413 // protein peptidyl-prolyl isomerization // inferred from direct assay /// 0000413 // protein peptidyl-prolyl isomerization // traceable author statement /// 0000413 // protein peptidyl-prolyl isomerization // inferred from electronic annotation /// 0003007 // heart morphogenesis // inferred from sequence or structural similarity /// 0006457 // protein folding // inferred from electronic …	0005737 // cytoplasm // inferred from electronic annotation /// 0005829 // cytosol // inferred from direct assay /// 0014802 // terminal cisterna // inferred from sequence or structural similarity /// 0030424 // axon // not recorded /// 0033017 // sarcoplasmic reticulum membrane // not recorded	0003755 // peptidyl-prolyl cis-trans isomerase activity // inferred from direct assay /// 0003755 // peptidyl-prolyl cis-trans isomerase activity // inferred from electronic annotation /// 0003755 // peptidyl-prolyl cis-trans isomerase activity // traceable author statement /// 0004871 // signal transducer activity // inferred from mutant phenotype /// 0005024 // transforming growth factor beta-a…	chr6:63921461-63921788 (+) // 99.28 // q12 /// chr20:1352755-1373642 (-) // 100.0 // p13
11728376_s_at	-0.367775	-0.315413	-0.378598	0.347075	0.315413	0.338373	0.000478219	5.88703e-06	-1.61055	-0.687549	1.61055	down	NMU	10874	0001696 // gastric acid secretion // inferred from electronic annotation /// 0006940 // regulation of smooth muscle contraction // traceable author statement /// 0006940 // regulation of smooth muscle contraction // inferred from electronic annotation /// 0006950 // response to stress // inferred from electronic annotation /// 0007165 // signal transduction // traceable author statement /// 00071…	0005576 // extracellular region // traceable author statement /// 0005576 // extracellular region // inferred from electronic annotation /// 0043195 // terminal button // inferred from electronic annotation	0005102 // receptor binding // traceable author statement /// 0042922 // neuromedin U receptor binding // inferred from electronic annotation	chr4:56461397-56502465 (-) // 93.62 // q12
11717341_at	-0.0530472	-0.0741253	-0.0541334	0.126635	0.144284	0.0530472	0.0209285	0.00424671	-1.12383	-0.168424	1.12383	down	PTGFRN	5738	0034389 // lipid particle organization // inferred from electronic annotation	0005783 // endoplasmic reticulum // inferred from electronic annotation /// 0005789 // endoplasmic reticulum membrane // inferred from electronic annotation /// 0005794 // Golgi apparatus // inferred from electronic annotation /// 0016020 // membrane // inferred from electronic annotation /// 0016021 // integral to membrane // inferred from electronic annotation	0005515 // protein binding // inferred from physical interaction	chr1:117452572-117532975 (+) // 96.47 // p13.1
11759881_at	-0.231339	-0.0472765	0.0472765	-0.224489	0.0553629	0.269837	0.685386	0.538721	-1.07974	-0.110683	1.07974	down	PPIA	5478	0000413 // protein peptidyl-prolyl isomerization // inferred from direct assay /// 0000413 // protein peptidyl-prolyl isomerization // inferred from electronic annotation /// 0002576 // platelet degranulation // traceable author statement /// 0006278 // RNA-dependent DNA replication // traceable author statement /// 0006457 // protein folding // inferred from electronic annotation /// 0006457 // …	0005576 // extracellular region // traceable author statement /// 0005634 // nucleus // inferred from direct assay /// 0005829 // cytosol // inferred from direct assay /// 0005829 // cytosol // traceable author statement	0003755 // peptidyl-prolyl cis-trans isomerase activity // inferred from direct assay /// 0003755 // peptidyl-prolyl cis-trans isomerase activity // inferred from electronic annotation /// 0005515 // protein binding // inferred from physical interaction /// 0016853 // isomerase activity // inferred from electronic annotation /// 0042277 // peptide binding // inferred from electronic annotation //…	chr11:3913430-3914122 (-) // 75.66 // p15.4
11735609_a_at	-0.129422	0.0222378	-0.0222378	0.128786	0.194074	-0.0576873	0.362127	0.20864	-1.09546	-0.131532	1.09546	down	FER1L5	90342		0016020 // membrane // inferred from electronic annotation /// 0016021 // integral to membrane // inferred from electronic annotation		chr2:97308573-97370624 (+) // 99.98 // q11.2
11734876_a_at	0.287599	-0.191532	-0.0111537	-0.0415475	0.1749	0.0111537	0.944239	0.903694	-1.01386	-0.0198644	1.01386	down	TMEM30B	161291	0070863 // positive regulation of protein exit from endoplasmic reticulum // inferred from direct assay	0016020 // membrane // inferred from electronic annotation /// 0016021 // integral to membrane // inferred from electronic annotation	0005515 // protein binding // inferred from physical interaction	chr14:61744087-61748558 (-) // 92.78 // q23.1
11721891_at	-0.03514	-0.0183496	0.0183496	0.236289	-0.0916462	0.302294	0.423511	0.260906	-1.11782	-0.160692	1.11782	down	LPHN1	22859	0007165 // signal transduction // inferred from electronic annotation /// 0007166 // cell surface receptor signaling pathway // inferred from electronic annotation /// 0007186 // G-protein coupled receptor signaling pathway // traceable author statement /// 0007186 // G-protein coupled receptor signaling pathway // inferred from electronic annotation /// 0007218 // neuropeptide signaling pathway …	0005886 // plasma membrane // inferred from electronic annotation /// 0014069 // postsynaptic density // inferred from electronic annotation /// 0016020 // membrane // inferred from electronic annotation /// 0016021 // integral to membrane // inferred from electronic annotation /// 0016021 // integral to membrane // traceable author statement	0004871 // signal transducer activity // inferred from electronic annotation /// 0004872 // receptor activity // inferred from electronic annotation /// 0004888 // transmembrane signaling receptor activity // inferred from electronic annotation /// 0004930 // G-protein coupled receptor activity // inferred from electronic annotation /// 0004930 // G-protein coupled receptor activity // traceable …	chr19:14258548-14316999 (-) // 97.96 // p13.12
11731997_at	0.118761	-0.0898004	-0.152524	0.0647807	-0.00689316	0.00689316	0.653799	0.500604	-1.04448	-0.0627817	1.04448	down	TRIM58	25893		0005622 // intracellular // inferred from electronic annotation	0008270 // zinc ion binding // inferred from electronic annotation /// 0046872 // metal ion binding // inferred from electronic annotation	chr1:248020471-248042611 (+) // 61.22 // q44
11725741_x_at	-0.0315971	-0.179416	-0.0130425	0.168386	0.0130425	0.0376	0.226388	0.107339	-1.1078	-0.147695	1.1078	down	SMPDL3B	27293	0006685 // sphingomyelin catabolic process // inferred from electronic annotation /// 0008152 // metabolic process // inferred from electronic annotation	0005576 // extracellular region // inferred from electronic annotation /// 0005615 // extracellular space // inferred from electronic annotation	0004767 // sphingomyelin phosphodiesterase activity // inferred from electronic annotation /// 0016787 // hydrolase activity // inferred from electronic annotation /// 0016798 // hydrolase activity, acting on glycosyl bonds // inferred from electronic annotation	chr1:28261466-28285663 (+) // 94.1 // p35.3
11751294_a_at	0.107732	0.526704	0.357663	-0.337745	-0.107732	-0.411729	0.0537876	0.0154987	1.53308	0.616435	1.53308	up	ST6GALNAC5	81849	0006486 // protein glycosylation // inferred from electronic annotation /// 0006688 // glycosphingolipid biosynthetic process // inferred from sequence or structural similarity /// 0006688 // glycosphingolipid biosynthetic process // inferred from electronic annotation /// 0009312 // oligosaccharide biosynthetic process // inferred from sequence or structural similarity /// 0009312 // oligosaccha…	0000139 // Golgi membrane // inferred from electronic annotation /// 0005794 // Golgi apparatus // inferred from electronic annotation /// 0016020 // membrane // inferred from electronic annotation /// 0016021 // integral to membrane // inferred from electronic annotation /// 0030173 // integral to Golgi membrane // inferred from electronic annotation	0001665 // alpha-N-acetylgalactosaminide alpha-2,6-sialyltransferase activity // inferred from sequence or structural similarity /// 0001665 // alpha-N-acetylgalactosaminide alpha-2,6-sialyltransferase activity // inferred from electronic annotation /// 0008373 // sialyltransferase activity // inferred from sequence or structural similarity /// 0008373 // sialyltransferase activity // inferred fr…	chr1:77333170-77529522 (+) // 81.07 // p31.1
11717275_s_at	-0.0406871	-0.017468	-0.12907	0.017468	0.0690699	0.039218	0.125579	0.0483757	-1.07499	-0.104327	1.07499	down	COL5A1	1289	0001568 // blood vessel development // inferred from electronic annotation /// 0003007 // heart morphogenesis // inferred from electronic annotation /// 0007155 // cell adhesion // inferred from mutant phenotype /// 0007411 // axon guidance // traceable author statement /// 0016477 // cell migration // inferred from mutant phenotype /// 0030199 // collagen fibril organization // inferred from mut…	0005576 // extracellular region // traceable author statement /// 0005576 // extracellular region // inferred from electronic annotation /// 0005578 // proteinaceous extracellular matrix // inferred from electronic annotation /// 0005581 // collagen // inferred from electronic annotation /// 0005588 // collagen type V // inferred from mutant phenotype /// 0005588 // collagen type V // traceable a…	0005178 // integrin binding // non-traceable author statement /// 0005201 // extracellular matrix structural constituent // inferred from electronic annotation /// 0008201 // heparin binding // inferred from direct assay /// 0008201 // heparin binding // inferred from electronic annotation /// 0043394 // proteoglycan binding // inferred from physical interaction /// 0048407 // platelet-derived gr…	chr9:137533565-137736689 (+) // 98.38 // q34.3
11739947_a_at	-0.0499232	0.15769	-0.0266721	0.0594647	0.0112169	-0.0112169	0.955158	0.921701	1.00501	0.00720987	1.00501	up	PFKFB2	5208	0005975 // carbohydrate metabolic process // traceable author statement /// 0006000 // fructose metabolic process // traceable author statement /// 0006000 // fructose metabolic process // inferred from electronic annotation /// 0006003 // fructose 2,6-bisphosphate metabolic process // inferred from electronic annotation /// 0006006 // glucose metabolic process // traceable author statement /// 0…	0005737 // cytoplasm // inferred from electronic annotation /// 0005829 // cytosol // traceable author statement	0000166 // nucleotide binding // inferred from electronic annotation /// 0003824 // catalytic activity // inferred from electronic annotation /// 0003873 // 6-phosphofructo-2-kinase activity // inferred from direct assay /// 0003873 // 6-phosphofructo-2-kinase activity // inferred from electronic annotation /// 0003873 // 6-phosphofructo-2-kinase activity // traceable author statement /// 0004331…	chr1:207226592-207254369 (+) // 99.21 // q32.2
11752129_a_at	0.146977	0.085587	0.155513	-0.138614	-0.109866	-0.0855875	0.00693096	0.00085425	1.18158	0.240715	1.18158	up	BIVM-ERCC5 /// ERCC5	100533467 /// 2073	0000718 // nucleotide-excision repair, DNA damage removal // traceable author statement /// 0006281 // DNA repair // traceable author statement /// 0006281 // DNA repair // inferred from electronic annotation /// 0006283 // transcription-coupled nucleotide-excision repair // inferred from mutant phenotype /// 0006283 // transcription-coupled nucleotide-excision repair // traceable author statemen…	0005634 // nucleus // inferred from direct assay /// 0005634 // nucleus // inferred from electronic annotation /// 0005654 // nucleoplasm // traceable author statement /// 0005675 // holo TFIIH complex // inferred from direct assay /// 0016591 // DNA-directed RNA polymerase II, holoenzyme // inferred from direct assay	0000405 // bubble DNA binding // inferred from direct assay /// 0003677 // DNA binding // inferred from electronic annotation /// 0003690 // double-stranded DNA binding // inferred from direct assay /// 0003697 // single-stranded DNA binding // inferred from direct assay /// 0003697 // single-stranded DNA binding // inferred from electronic annotation /// 0003824 // catalytic activity // inferred…	chr13:103498396-103524611 (+) // 97.64 // q33.1
11717129_s_at	0.209407	0.362702	0.309402	-0.209407	-0.267288	-0.332993	0.0055654	0.000602155	1.47809	0.563733	1.47809	up	SAR1A	56681	0006184 // GTP catabolic process // non-traceable author statement /// 0006810 // transport // inferred from electronic annotation /// 0006886 // intracellular protein transport // inferred from electronic annotation /// 0006888 // ER to Golgi vesicle-mediated transport // non-traceable author statement /// 0015031 // protein transport // inferred from electronic annotation /// 0016192 // vesicle…	0005622 // intracellular // inferred from electronic annotation /// 0005737 // cytoplasm // non-traceable author statement /// 0005783 // endoplasmic reticulum // inferred from direct assay /// 0005783 // endoplasmic reticulum // inferred from electronic annotation /// 0005794 // Golgi apparatus // inferred from electronic annotation /// 0016529 // sarcoplasmic reticulum // inferred from electron…	0000166 // nucleotide binding // inferred from electronic annotation /// 0003924 // GTPase activity // non-traceable author statement /// 0005525 // GTP binding // inferred from electronic annotation	chr10:71909325-71930279 (-) // 84.52 // q22.1
11740589_s_at	0.201271	0.174829	0.15575	-0.15575	-0.191492	-0.182406	0.00106409	3.15314e-05	1.27795	0.353833	1.27795	up	RYK	6259	0006468 // protein phosphorylation // inferred from direct assay /// 0006468 // protein phosphorylation // inferred from electronic annotation /// 0007165 // signal transduction // traceable author statement /// 0007409 // axonogenesis // inferred from electronic annotation /// 0007411 // axon guidance // inferred from sequence or structural similarity /// 0007411 // axon guidance // inferred fro…	0005624 // membrane fraction // inferred from electronic annotation /// 0005634 // nucleus // inferred from sequence or structural similarity /// 0005634 // nucleus // inferred from electronic annotation /// 0005737 // cytoplasm // inferred from sequence or structural similarity /// 0005737 // cytoplasm // inferred from electronic annotation /// 0005886 // plasma membrane // inferred from electro…	0000166 // nucleotide binding // inferred from electronic annotation /// 0004672 // protein kinase activity // inferred from electronic annotation /// 0004713 // protein tyrosine kinase activity // inferred from direct assay /// 0004713 // protein tyrosine kinase activity // inferred from electronic annotation /// 0004714 // transmembrane receptor protein tyrosine kinase activity // inferred from…	chr3:133875977-133969586 (-) // 92.38 // q22.2
11715690_x_at	-0.100455	-0.101283	-0.0871716	0.0871716	0.137924	0.131718	0.00291584	0.00020531	-1.1609	-0.215241	1.1609	down	CD164	8763	0006955 // immune response // traceable author statement /// 0007155 // cell adhesion // inferred from direct assay /// 0007155 // cell adhesion // inferred from electronic annotation /// 0007155 // cell adhesion // traceable author statement /// 0007157 // heterophilic cell-cell adhesion // inferred from direct assay /// 0007162 // negative regulation of cell adhesion // non-traceable author sta…	0005576 // extracellular region // inferred from electronic annotation /// 0005764 // lysosome // inferred from direct assay /// 0005764 // lysosome // inferred from electronic annotation /// 0005765 // lysosomal membrane // inferred from electronic annotation /// 0005768 // endosome // inferred from direct assay /// 0005768 // endosome // inferred from electronic annotation /// 0005886 // plasma…	0005515 // protein binding // inferred from physical interaction	chr6:109687716-109703978 (-) // 97.26 // q21
11741555_s_at	0.00808144	-0.000303268	-0.00143147	0.00801945	-0.023941	0.000303268	0.660131	0.508058	1.00509	0.00732161	1.00509	up	LIPA /// LOC100507575	100507575 /// 3988	0000902 // cell morphogenesis // inferred from electronic annotation /// 0001816 // cytokine production // inferred from electronic annotation /// 0006629 // lipid metabolic process // inferred from electronic annotation /// 0006631 // fatty acid metabolic process // inferred from electronic annotation /// 0006954 // inflammatory response // inferred from electronic annotation /// 0008283 // cell…	0005764 // lysosome // inferred from electronic annotation /// 0005764 // lysosome // traceable author statement	0004771 // sterol esterase activity // inferred from direct assay /// 0004771 // sterol esterase activity // inferred from electronic annotation /// 0016298 // lipase activity // inferred from direct assay /// 0016298 // lipase activity // inferred from electronic annotation /// 0016787 // hydrolase activity // inferred from electronic annotation /// 0016788 // hydrolase activity, acting on ester…	chr10:90973327-91011660 (-) // 97.23 // q23.31
11758631_s_at	-0.155073	-0.0783434	0.387968	0.0216007	-0.0216007	0.0989604	0.954066	0.919998	1.01293	0.0185303	1.01293	up	FOXO4	4303	0000080 // G1 phase of mitotic cell cycle // inferred from direct assay /// 0006351 // transcription, DNA-dependent // inferred from electronic annotation /// 0006355 // regulation of transcription, DNA-dependent // inferred from direct assay /// 0006355 // regulation of transcription, DNA-dependent // inferred from electronic annotation /// 0006366 // transcription from RNA polymerase II promote…	0005634 // nucleus // inferred from direct assay /// 0005634 // nucleus // inferred from electronic annotation /// 0005654 // nucleoplasm // traceable author statement /// 0005667 // transcription factor complex // not recorded /// 0005737 // cytoplasm // inferred from direct assay /// 0005737 // cytoplasm // inferred from electronic annotation /// 0005829 // cytosol // inferred from direct assay…	0003677 // DNA binding // inferred from direct assay /// 0003677 // DNA binding // inferred from electronic annotation /// 0003690 // double-stranded DNA binding // not recorded /// 0003700 // sequence-specific DNA binding transcription factor activity // inferred from direct assay /// 0003700 // sequence-specific DNA binding transcription factor activity // inferred from electronic annotation //…	chrX:70321367-70323384 (+) // 98.84 // q13.1
11744193_x_at	-0.0587769	-0.0357752	-0.0129585	0.0129585	0.0396099	0.0202198	0.0591192	0.0176328	-1.04254	-0.0600995	1.04254	down	SUMO1	7341	0006281 // DNA repair // traceable author statement /// 0006355 // regulation of transcription, DNA-dependent // inferred from electronic annotation /// 0016925 // protein sumoylation // inferred from direct assay /// 0016925 // protein sumoylation // inferred from electronic annotation /// 0019221 // cytokine-mediated signaling pathway // traceable author statement /// 0031334 // positive regula…	0005634 // nucleus // inferred from direct assay /// 0005634 // nucleus // inferred from electronic annotation /// 0005634 // nucleus // traceable author statement /// 0005643 // nuclear pore // traceable author statement /// 0005654 // nucleoplasm // traceable author statement /// 0005737 // cytoplasm // inferred from electronic annotation /// 0016020 // membrane // inferred from electronic anno…	0005515 // protein binding // inferred from physical interaction /// 0008134 // transcription factor binding // inferred from electronic annotation /// 0019789 // SUMO ligase activity // inferred from electronic annotation /// 0031625 // ubiquitin protein ligase binding // inferred from physical interaction	chr2:203070904-203103322 (-) // 91.91 // q33.1
11761061_at	-0.066246	-0.115693	-0.0225706	0.265422	0.0670648	0.0225706	0.17984	0.0784533	-1.13802	-0.186522	1.13802	down	UQCRC1	7384	0006119 // oxidative phosphorylation // traceable author statement /// 0006122 // mitochondrial electron transport, ubiquinol to cytochrome c // inferred from electronic annotation /// 0006508 // proteolysis // inferred from electronic annotation /// 0009060 // aerobic respiration // traceable author statement /// 0014823 // response to activity // inferred from electronic annotation /// 0022900 …	0005739 // mitochondrion // inferred from direct assay /// 0005739 // mitochondrion // inferred from electronic annotation /// 0005743 // mitochondrial inner membrane // traceable author statement /// 0005743 // mitochondrial inner membrane // inferred from electronic annotation /// 0005746 // mitochondrial respiratory chain // traceable author statement /// 0005750 // mitochondrial respiratory c…	0003824 // catalytic activity // inferred from electronic annotation /// 0004222 // metalloendopeptidase activity // inferred from electronic annotation /// 0008121 // ubiquinol-cytochrome-c reductase activity // traceable author statement /// 0008270 // zinc ion binding // inferred from electronic annotation /// 0032403 // protein complex binding // inferred from electronic annotation /// 004687…	chr3:48641403-48647069 (-) // 99.38 // p21.31
11751683_a_at	0.0985575	0.240798	0.0990505	-0.0985575	-0.119103	-0.273958	0.0475375	0.0130929	1.23971	0.310008	1.23971	up	RAB11A	8766	0000910 // cytokinesis // inferred from mutant phenotype /// 0006184 // GTP catabolic process // inferred from direct assay /// 0006810 // transport // inferred from electronic annotation /// 0006833 // water transport // traceable author statement /// 0007049 // cell cycle // inferred from electronic annotation /// 0007264 // small GTPase mediated signal transduction // inferred from electronic …	0005739 // mitochondrion // inferred from electronic annotation /// 0005768 // endosome // inferred from electronic annotation /// 0005802 // trans-Golgi network // inferred from direct assay /// 0005886 // plasma membrane // inferred from electronic annotation /// 0016020 // membrane // inferred from electronic annotation /// 0030133 // transport vesicle // inferred from electronic annotation //…	0000166 // nucleotide binding // inferred from electronic annotation /// 0003924 // GTPase activity // inferred from direct assay /// 0005515 // protein binding // inferred from physical interaction /// 0005525 // GTP binding // inferred from electronic annotation /// 0019905 // syntaxin binding // non-traceable author statement	chr15:66161793-66180585 (+) // 99.8 // q22.31
11738815_at	-0.110817	0.128951	-0.0428982	0.0428982	0.0796783	-0.0553579	0.829557	0.727279	-1.02148	-0.0306607	1.02148	down	EGFR	1956	0000165 // MAPK cascade // non-traceable author statement /// 0000186 // activation of MAPKK activity // non-traceable author statement /// 0000902 // cell morphogenesis // inferred from electronic annotation /// 0001503 // ossification // non-traceable author statement /// 0001892 // embryonic placenta development // inferred from electronic annotation /// 0001942 // hair follicle development //…	0000139 // Golgi membrane // inferred from electronic annotation /// 0005576 // extracellular region // inferred from electronic annotation /// 0005615 // extracellular space // non-traceable author statement /// 0005622 // intracellular // inferred from electronic annotation /// 0005634 // nucleus // inferred from direct assay /// 0005634 // nucleus // inferred from electronic annotation /// 000…	0000166 // nucleotide binding // inferred from electronic annotation /// 0003690 // double-stranded DNA binding // non-traceable author statement /// 0004672 // protein kinase activity // inferred from electronic annotation /// 0004709 // MAP kinase kinase kinase activity // non-traceable author statement /// 0004713 // protein tyrosine kinase activity // inferred from direct assay /// 0004713 //…	chr7:55086724-55238738 (+) // 96.65 // p11.2
11753382_a_at	-0.158618	-0.370828	-0.214941	0.158619	0.185857	0.29256	0.0188117	0.00365418	-1.37599	-0.460474	1.37599	down	ZC4H2	55906			0046872 // metal ion binding // inferred from electronic annotation	chrX:64137300-64196330 (-) // 100.0 // q11.2
11732621_a_at	-0.0889998	0.00738382	0.131888	0.138684	-0.0335808	-0.00738335	0.917114	0.858869	-1.01102	-0.0158161	1.01102	down	CRB3	92359	0034329 // cell junction assembly // traceable author statement /// 0045216 // cell-cell junction organization // traceable author statement /// 0070830 // tight junction assembly // traceable author statement /// 0072659 // protein localization in plasma membrane // inferred from direct assay	0005886 // plasma membrane // traceable author statement /// 0005886 // plasma membrane // inferred from electronic annotation /// 0005923 // tight junction // inferred from electronic annotation /// 0016020 // membrane // inferred from electronic annotation /// 0016021 // integral to membrane // inferred from electronic annotation /// 0016324 // apical plasma membrane // inferred from electronic…	0017124 // SH3 domain binding // inferred from physical interaction /// 0019904 // protein domain specific binding // inferred from physical interaction	chr19:6464248-6467228 (+) // 96.64 // p13.3
11726910_x_at	-0.235775	-0.210424	-0.192471	0.192471	0.402267	0.429912	0.0118695	0.00187792	-1.4686	-0.55444	1.4686	down	MRI1	84245	0000096 // sulfur amino acid metabolic process // traceable author statement /// 0006595 // polyamine metabolic process // traceable author statement /// 0008652 // cellular amino acid biosynthetic process // inferred from electronic annotation /// 0009086 // methionine biosynthetic process // inferred from electronic annotation /// 0019509 // L-methionine salvage from methylthioadenosine // not …	0005634 // nucleus // inferred from electronic annotation /// 0005737 // cytoplasm // not recorded /// 0005737 // cytoplasm // inferred from electronic annotation /// 0005829 // cytosol // traceable author statement /// 0042995 // cell projection // inferred from electronic annotation	0016853 // isomerase activity // inferred from electronic annotation /// 0042802 // identical protein binding // inferred from physical interaction /// 0046523 // S-methyl-5-thioribose-1-phosphate isomerase activity // not recorded /// 0046523 // S-methyl-5-thioribose-1-phosphate isomerase activity // inferred from electronic annotation	chr19:13875361-13885095 (+) // 38.97 // p13.2
11729067_a_at	-0.176695	0.0385714	-0.0385714	0.217371	-0.181257	0.196869	0.56196	0.396904	-1.09928	-0.13656	1.09928	down	PM20D1	148811	0006508 // proteolysis // inferred from electronic annotation /// 0008152 // metabolic process // inferred from electronic annotation	0005576 // extracellular region // inferred from electronic annotation	0008233 // peptidase activity // inferred from electronic annotation /// 0016787 // hydrolase activity // inferred from electronic annotation /// 0046872 // metal ion binding // inferred from electronic annotation	chr1:205797153-205819270 (-) // 94.85 // q32.1
11735923_x_at	-0.0520372	0.0190053	-0.0965924	0.0116453	-0.0116453	0.0901284	0.330998	0.183588	-1.05208	-0.073251	1.05208	down	AMELY	266	0007275 // multicellular organismal development // inferred from electronic annotation /// 0031214 // biomineral tissue development // inferred from electronic annotation	0005576 // extracellular region // inferred from electronic annotation /// 0005578 // proteinaceous extracellular matrix // inferred from electronic annotation /// 0044420 // extracellular matrix part // inferred by curator	0030345 // structural constituent of tooth enamel // inferred from direct assay	chrY:6733958-6742068 (-) // 100.0 // p11.2
11715838_a_at	0.00221825	0.011097	-0.00221825	-0.0688496	-0.0494518	0.00236797	0.247482	0.121689	1.02979	0.0423434	1.02979	up	NEU1	4758	0006665 // sphingolipid metabolic process // traceable author statement /// 0006687 // glycosphingolipid metabolic process // traceable author statement /// 0008152 // metabolic process // inferred from electronic annotation /// 0044281 // small molecule metabolic process // traceable author statement	0005764 // lysosome // traceable author statement /// 0005764 // lysosome // inferred from electronic annotation /// 0005765 // lysosomal membrane // inferred from electronic annotation /// 0005886 // plasma membrane // inferred from electronic annotation /// 0016020 // membrane // inferred from electronic annotation /// 0016023 // cytoplasmic membrane-bounded vesicle // inferred from electronic …	0004308 // exo-alpha-sialidase activity // traceable author statement /// 0004308 // exo-alpha-sialidase activity // inferred from electronic annotation /// 0016787 // hydrolase activity // inferred from electronic annotation /// 0016798 // hydrolase activity, acting on glycosyl bonds // inferred from electronic annotation /// 0052794 // exo-alpha-(2->3)-sialidase activity // inferred from electr…	chr6:31826829-31830709 (-) // 98.05 // p21.33
11724977_a_at	-0.0853577	-0.0131965	-0.0580454	0.109597	0.0131965	0.0519509	0.0976655	0.0344039	-1.07956	-0.110448	1.07956	down	ITGB4	3691	0007154 // cell communication // inferred from electronic annotation /// 0007155 // cell adhesion // non-traceable author statement /// 0007155 // cell adhesion // inferred from electronic annotation /// 0007160 // cell-matrix adhesion // inferred from electronic annotation /// 0007229 // integrin-mediated signaling pathway // inferred from electronic annotation /// 0007275 // multicellular organ…	0005604 // basement membrane // inferred from electronic annotation /// 0005886 // plasma membrane // inferred from direct assay /// 0005886 // plasma membrane // traceable author statement /// 0008305 // integrin complex // inferred from electronic annotation /// 0008305 // integrin complex // traceable author statement /// 0009925 // basal plasma membrane // inferred from electronic annotation …	0004872 // receptor activity // inferred from electronic annotation /// 0005102 // receptor binding // inferred from electronic annotation /// 0005515 // protein binding // inferred from physical interaction	chr17:73720775-73753899 (+) // 97.34 // q25.1
11727630_s_at	0.142941	0.0408669	0.266011	-0.0408669	-0.166997	-0.1962	0.0753321	0.0242704	1.2181	0.284628	1.2181	up	APBA2	321	0001701 // in utero embryonic development // inferred from electronic annotation /// 0006810 // transport // inferred from electronic annotation /// 0007399 // nervous system development // traceable author statement /// 0007626 // locomotory behavior // inferred from electronic annotation /// 0015031 // protein transport // inferred from electronic annotation /// 0035264 // multicellular organis…	0005886 // plasma membrane // inferred from electronic annotation	0001540 // beta-amyloid binding // inferred from electronic annotation /// 0005515 // protein binding // inferred from physical interaction	chr15:29131174-29410518 (+) // 97.63 // q13.1
11721492_a_at	0.0271449	-0.099905	-0.269512	-0.0271449	0.19507	0.286544	0.221561	0.104153	-1.20212	-0.265581	1.20212	down	ANKRD7	56311	0008584 // male gonad development // traceable author statement			chr7:117864158-117882761 (+) // 77.6 // q31.31
11745824_x_at	-0.0582085	-0.052371	0.0160809	0.0401182	0.194644	-0.0160809	0.346959	0.196141	-1.07504	-0.104393	1.07504	down	ACAA1	30	0000038 // very long-chain fatty acid metabolic process // inferred from mutant phenotype /// 0006629 // lipid metabolic process // inferred from electronic annotation /// 0006631 // fatty acid metabolic process // inferred from electronic annotation /// 0006635 // fatty acid beta-oxidation // inferred from mutant phenotype /// 0008152 // metabolic process // inferred from electronic annotation /…	0005777 // peroxisome // inferred from direct assay /// 0005777 // peroxisome // inferred from electronic annotation /// 0005782 // peroxisomal matrix // traceable author statement /// 0043231 // intracellular membrane-bounded organelle // inferred from direct assay	0003824 // catalytic activity // inferred from electronic annotation /// 0003988 // acetyl-CoA C-acyltransferase activity // inferred from electronic annotation /// 0005515 // protein binding // inferred from physical interaction /// 0016401 // palmitoyl-CoA oxidase activity // inferred from mutant phenotype /// 0016740 // transferase activity // inferred from electronic annotation /// 0016746 //…	chr3:38164206-38178628 (-) // 96.78 // p22.2
11753172_a_at	-0.189632	-0.0877657	0.0204597	0.0572515	0.172637	-0.0204597	0.263624	0.133037	-1.11377	-0.155456	1.11377	down	GRB7	2886	0007165 // signal transduction // inferred from electronic annotation /// 0007173 // epidermal growth factor receptor signaling pathway // traceable author statement /// 0007596 // blood coagulation // traceable author statement /// 0017148 // negative regulation of translation // inferred from sequence or structural similarity /// 0017148 // negative regulation of translation // inferred from el…	0005737 // cytoplasm // inferred from electronic annotation /// 0005829 // cytosol // inferred from direct assay /// 0005829 // cytosol // traceable author statement /// 0005886 // plasma membrane // inferred from electronic annotation /// 0005925 // focal adhesion // inferred from direct assay /// 0005925 // focal adhesion // inferred from electronic annotation /// 0010494 // cytoplasmic stress …	0003723 // RNA binding // inferred from electronic annotation /// 0004872 // receptor activity // inferred from electronic annotation /// 0005070 // SH3/SH2 adaptor activity // traceable author statement /// 0005515 // protein binding // inferred from physical interaction /// 0005543 // phospholipid binding // inferred from electronic annotation /// 0008289 // lipid binding // inferred from elect…	chr17:37894558-37900857 (+) // 99.74 // q12
11760649_a_at	-0.0571094	-0.0137749	0.0425339	0.0137749	-0.144058	0.27862	0.785134	0.66608	-1.04167	-0.0588958	1.04167	down	MKNK1	8569	0006417 // regulation of translation // inferred from electronic annotation /// 0006468 // protein phosphorylation // inferred from direct assay /// 0006468 // protein phosphorylation // inferred from electronic annotation /// 0007243 // intracellular protein kinase cascade // inferred from direct assay /// 0008543 // fibroblast growth factor receptor signaling pathway // traceable author stateme…	0005634 // nucleus // inferred from electronic annotation /// 0005737 // cytoplasm // inferred from electronic annotation /// 0005829 // cytosol // traceable author statement	0000166 // nucleotide binding // inferred from electronic annotation /// 0004672 // protein kinase activity // inferred from electronic annotation /// 0004674 // protein serine/threonine kinase activity // inferred from direct assay /// 0004674 // protein serine/threonine kinase activity // inferred from electronic annotation /// 0005515 // protein binding // inferred from physical interaction //…	chr1:47023089-47082515 (-) // 99.93 // p33
11738270_a_at	-0.04476	0.0161319	-0.228399	0.0286286	0.0215297	-0.0161321	0.427224	0.264352	-1.06956	-0.0970176	1.06956	down	SERP2	387923	0006810 // transport // inferred from electronic annotation /// 0015031 // protein transport // inferred from electronic annotation	0005783 // endoplasmic reticulum // inferred from electronic annotation /// 0005789 // endoplasmic reticulum membrane // inferred from electronic annotation /// 0016020 // membrane // inferred from electronic annotation /// 0016021 // integral to membrane // inferred from electronic annotation		chr13:44947886-44971849 (+) // 91.7 // q14.11
11735541_at	-0.136621	0.0524604	-0.100918	-0.0524604	0.147414	0.205679	0.315899	0.17157	-1.11876	-0.161904	1.11876	down	CCDC122	160857				chr13:44410490-44454599 (-) // 80.6 // q14.11
11745604_x_at	0.14824	0.0913229	0.166824	-0.141122	-0.253407	-0.0913234	0.0233986	0.00496963	1.22894	0.297413	1.22894	up	NFKBIB	4793	0002224 // toll-like receptor signaling pathway // traceable author statement /// 0002755 // MyD88-dependent toll-like receptor signaling pathway // traceable author statement /// 0002756 // MyD88-independent toll-like receptor signaling pathway // traceable author statement /// 0006351 // transcription, DNA-dependent // traceable author statement /// 0007165 // signal transduction // traceable a…	0005634 // nucleus // inferred from electronic annotation /// 0005737 // cytoplasm // inferred from electronic annotation /// 0005829 // cytosol // traceable author statement /// 0005829 // cytosol // inferred from electronic annotation	0003713 // transcription coactivator activity // traceable author statement /// 0004871 // signal transducer activity // traceable author statement /// 0005515 // protein binding // inferred from physical interaction	chr19:39390672-39399458 (+) // 96.25 // q13.2
11754940_s_at	0.000407219	0.0265236	0.0995255	-0.000407219	-0.163015	-0.0521593	0.23521	0.113275	1.08223	0.114013	1.08223	up	TSN	7247	0006310 // DNA recombination // traceable author statement /// 0090305 // nucleic acid phosphodiester bond hydrolysis // inferred from electronic annotation	0005634 // nucleus // inferred from electronic annotation /// 0005634 // nucleus // traceable author statement /// 0005737 // cytoplasm // inferred from electronic annotation	0003677 // DNA binding // traceable author statement /// 0003677 // DNA binding // inferred from electronic annotation /// 0003723 // RNA binding // inferred from electronic annotation /// 0003729 // mRNA binding // inferred from electronic annotation /// 0004518 // nuclease activity // inferred from electronic annotation /// 0004519 // endonuclease activity // inferred from electronic annotation…	chr2:122523605-122524869 (+) // 82.15 // q14.3
11734199_a_at	0.0615549	-0.0081501	-0.0503235	0.00482655	0	0	0.992441	0.986642	-1.0004	-0.0005817	1.0004	down	ZNF844	284391	0006351 // transcription, DNA-dependent // inferred from electronic annotation /// 0006355 // regulation of transcription, DNA-dependent // inferred from electronic annotation	0005622 // intracellular // inferred from electronic annotation /// 0005634 // nucleus // inferred from electronic annotation	0003676 // nucleic acid binding // inferred from electronic annotation /// 0003677 // DNA binding // inferred from electronic annotation /// 0008270 // zinc ion binding // inferred from electronic annotation /// 0046872 // metal ion binding // inferred from electronic annotation	chr19:12175527-12191178 (+) // 67.75 // p13.2
11721375_a_at	-0.294492	-0.327003	0.0204878	-0.0204878	0.131134	0.0803299	0.201661	0.0915844	-1.2008	-0.263994	1.2008	down	BCL2	596	0000082 // G1/S transition of mitotic cell cycle // inferred from electronic annotation /// 0000209 // protein polyubiquitination // inferred from direct assay /// 0000902 // cell morphogenesis // inferred from electronic annotation /// 0001101 // response to acid // inferred from electronic annotation /// 0001503 // ossification // inferred from electronic annotation /// 0001541 // ovarian folli…	0005622 // intracellular // inferred from electronic annotation /// 0005624 // membrane fraction // inferred from electronic annotation /// 0005634 // nucleus // inferred from direct assay /// 0005634 // nucleus // inferred from electronic annotation /// 0005737 // cytoplasm // inferred from direct assay /// 0005737 // cytoplasm // inferred from electronic annotation /// 0005739 // mitochondrion …	0002020 // protease binding // inferred from direct assay /// 0005515 // protein binding // inferred from physical interaction /// 0008134 // transcription factor binding // inferred from electronic annotation /// 0015267 // channel activity // inferred from direct assay /// 0019903 // protein phosphatase binding // inferred from electronic annotation /// 0031625 // ubiquitin protein ligase bindi…	chr18:60790581-60987019 (-) // 96.73 // q21.33
11715890_x_at	-0.0237522	0.0298786	0.000878334	0.0468769	-0.000879288	-0.0087986	0.801136	0.68796	-1.007	-0.0100648	1.007	down	ATP5I	521	0006200 // ATP catabolic process // inferred from direct assay /// 0006754 // ATP biosynthetic process // inferred from electronic annotation /// 0006810 // transport // inferred from electronic annotation /// 0006811 // ion transport // inferred from electronic annotation /// 0015986 // ATP synthesis coupled proton transport // inferred from electronic annotation /// 0015992 // proton transport …	0000276 // mitochondrial proton-transporting ATP synthase complex, coupling factor F(o) // inferred from electronic annotation /// 0005739 // mitochondrion // inferred by curator /// 0005739 // mitochondrion // inferred from direct assay /// 0005739 // mitochondrion // inferred from electronic annotation /// 0005743 // mitochondrial inner membrane // traceable author statement /// 0005743 // mito…	0015078 // hydrogen ion transmembrane transporter activity // inferred from electronic annotation /// 0016887 // ATPase activity // inferred from direct assay /// 0022857 // transmembrane transporter activity // inferred by curator	chr4:666224-668127 (-) // 69.88 // p16.3
11741639_a_at	0.0394454	-0.0394454	-0.0459208	0.282884	0.0484328	-0.19449	0.800453	0.687	-1.04313	-0.0609159	1.04313	down	DIO2	1734	0001514 // selenocysteine incorporation // non-traceable author statement /// 0006590 // thyroid hormone generation // traceable author statement /// 0006590 // thyroid hormone generation // inferred from electronic annotation /// 0009409 // response to cold // inferred from electronic annotation /// 0032496 // response to lipopolysaccharide // inferred from electronic annotation /// 0034641 // c…	0005886 // plasma membrane // traceable author statement /// 0016020 // membrane // inferred by curator /// 0016020 // membrane // inferred from electronic annotation /// 0016021 // integral to membrane // inferred from electronic annotation	0004800 // thyroxine 5'-deiodinase activity // inferred from direct assay /// 0004800 // thyroxine 5'-deiodinase activity // traceable author statement /// 0004800 // thyroxine 5'-deiodinase activity // inferred from electronic annotation /// 0008430 // selenium binding // inferred by curator /// 0008430 // selenium binding // traceable author statement /// 0016491 // oxidoreductase activity // i…	chr14:80663869-80677843 (-) // 97.08 // q31.1
11737705_s_at	-0.0546899	-0.199598	-0.258677	0.220183	0.0546899	0.103683	0.0623923	0.0189267	-1.22873	-0.297174	1.22873	down	LOC441956	441956				chr21:15051592-15053459 (-) // 94.97 // q11.2
11745173_a_at	-0.00554752	-0.00921059	0.00554752	0.00965309	0.0126276	-0.0700207	0.783754	0.663989	1.00894	0.0128431	1.00894	up	ATF6	22926	0006351 // transcription, DNA-dependent // inferred from electronic annotation /// 0006355 // regulation of transcription, DNA-dependent // inferred from electronic annotation /// 0006357 // regulation of transcription from RNA polymerase II promoter // traceable author statement /// 0006457 // protein folding // traceable author statement /// 0006950 // response to stress // traceable author sta…	0000139 // Golgi membrane // traceable author statement /// 0005634 // nucleus // traceable author statement /// 0005634 // nucleus // inferred from electronic annotation /// 0005635 // nuclear envelope // traceable author statement /// 0005654 // nucleoplasm // traceable author statement /// 0005783 // endoplasmic reticulum // inferred from electronic annotation /// 0005789 // endoplasmic reticu…	0003677 // DNA binding // inferred from electronic annotation /// 0003700 // sequence-specific DNA binding transcription factor activity // inferred from electronic annotation /// 0003700 // sequence-specific DNA binding transcription factor activity // traceable author statement /// 0003713 // transcription coactivator activity // traceable author statement /// 0005515 // protein binding // infe…	chr1:161736044-161835750 (+) // 76.51 // q23.3
11743650_s_at	-0.0945044	0.0540895	-0.0412416	0.053627	0.0255823	-0.0255833	0.576075	0.411788	-1.03175	-0.0450942	1.03175	down	DEK	7913	0006357 // regulation of transcription from RNA polymerase II promoter // traceable author statement /// 0006366 // transcription from RNA polymerase II promoter // traceable author statement /// 0007165 // signal transduction // traceable author statement /// 0016568 // chromatin modification // inferred from electronic annotation /// 0019079 // viral genome replication // traceable author state…	0005634 // nucleus // inferred from direct assay /// 0005634 // nucleus // inferred from electronic annotation /// 0005634 // nucleus // traceable author statement	0003676 // nucleic acid binding // inferred from electronic annotation /// 0003677 // DNA binding // inferred from electronic annotation /// 0042393 // histone binding // inferred from direct assay	chr6:18224247-18265054 (-) // 96.95 // p22.3
11722908_a_at	-0.476821	-0.434537	-0.509999	0.47207	0.615049	0.434537	0.00168515	7.75195e-05	-1.97384	-0.981005	1.97384	down	KLHL13	90293	0000910 // cytokinesis // inferred from mutant phenotype /// 0007049 // cell cycle // inferred from electronic annotation /// 0007067 // mitosis // inferred from electronic annotation /// 0016567 // protein ubiquitination // inferred from direct assay /// 0016567 // protein ubiquitination // inferred from electronic annotation /// 0051301 // cell division // inferred from electronic annotation	0031463 // Cul3-RING ubiquitin ligase complex // inferred from direct assay	0004842 // ubiquitin-protein ligase activity // inferred from direct assay	chrX:117031775-117107760 (-) // 96.61 // q24
11736322_a_at	-0.304558	-0.0334887	0.0589852	0.213095	0.0334887	-0.0901456	0.525146	0.35889	-1.10586	-0.145167	1.10586	down	BAIAP3	8938	0007186 // G-protein coupled receptor signaling pathway // inferred from physical interaction /// 0007269 // neurotransmitter secretion // traceable author statement		0008022 // protein C-terminus binding // traceable author statement	chr16:1384504-1399440 (+) // 97.1 // p13.3
11727575_a_at	-0.117974	0.157969	0.0608234	0.0435195	-0.0435195	-0.109843	0.643884	0.488762	1.04988	0.0702207	1.04988	up	TMEM237	65062	0030030 // cell projection organization // inferred from electronic annotation /// 0030111 // regulation of Wnt receptor signaling pathway // inferred from mutant phenotype /// 0030111 // regulation of Wnt receptor signaling pathway // inferred from electronic annotation /// 0042384 // cilium assembly // inferred from mutant phenotype /// 0042384 // cilium assembly // inferred from electronic ann…	0005929 // cilium // inferred from electronic annotation /// 0016020 // membrane // inferred from electronic annotation /// 0016021 // integral to membrane // inferred from electronic annotation /// 0035869 // ciliary transition zone // inferred from direct assay /// 0035869 // ciliary transition zone // inferred from electronic annotation /// 0042995 // cell projection // inferred from electroni…		chr2:202484910-202507686 (-) // 72.55 // q33.1
11752260_a_at	-0.042448	0.0424478	-0.0436029	0.0950804	-0.0888889	0.141839	0.60826	0.447757	-1.04527	-0.0638779	1.04527	down	TMC3	342125		0016020 // membrane // inferred from electronic annotation /// 0016021 // integral to membrane // inferred from electronic annotation		chr15:81629982-81666497 (-) // 93.69 // q25.1
11745069_a_at	0.0598211	0.106249	0.199494	-0.220248	-0.197424	-0.0598211	0.0454376	0.0122758	1.21505	0.281019	1.21505	up	C5orf44	80006				chr5:64958926-64961899 (+) // 89.97 // q12.3
11748282_a_at	0.271952	0.391207	0.325848	-0.337234	-0.271952	-0.323374	0.0017909	8.70884e-05	1.55889	0.640522	1.55889	up	PPP3CB	5532	0006468 // protein phosphorylation // inferred from sequence or structural similarity /// 0006470 // protein dephosphorylation // inferred from sequence or structural similarity /// 0007165 // signal transduction // non-traceable author statement /// 0007612 // learning // traceable author statement /// 0007613 // memory // traceable author statement /// 0016311 // dephosphorylation // traceable …	0005829 // cytosol // traceable author statement /// 0005886 // plasma membrane // inferred from sequence or structural similarity /// 0005955 // calcineurin complex // inferred from direct assay	0000166 // nucleotide binding // inferred from electronic annotation /// 0004721 // phosphoprotein phosphatase activity // inferred from electronic annotation /// 0004722 // protein serine/threonine phosphatase activity // non-traceable author statement /// 0005509 // calcium ion binding // inferred from direct assay /// 0005516 // calmodulin binding // inferred from direct assay /// 0005516 // c…	chr10:75196996-75226245 (-) // 98.36 // q22.2
11728165_a_at	0.0721636	-0.101869	-0.0327115	0.0327115	-0.0662913	0.161495	0.643146	0.487798	-1.04496	-0.0634441	1.04496	down	SPINLW1 /// SPINLW1-WFDC6	100526773 /// 57119	0006508 // proteolysis // inferred from electronic annotation /// 0010466 // negative regulation of peptidase activity // inferred from electronic annotation	0005576 // extracellular region // inferred from electronic annotation	0004867 // serine-type endopeptidase inhibitor activity // inferred from electronic annotation /// 0008233 // peptidase activity // inferred from electronic annotation /// 0030414 // peptidase inhibitor activity // inferred from electronic annotation	chr20:44169549-44175016 (-) // 46.5 // q13.12
11760927_a_at	-0.00986099	0.206932	-0.120881	-0.0865812	0.0131879	0.00986147	0.788427	0.670662	1.03281	0.046574	1.03281	up	LRCH3	84859		0005576 // extracellular region // inferred from electronic annotation		chr3:197518109-197610643 (+) // 99.4 // q29
11762829_at	-0.525055	0	0.0324826	0.0511956	0	-0.110941	0.639604	0.483235	-1.10518	-0.144276	1.10518	down	LOC100506242	100506242				chr1:180138711-180139938 (+) // 98.94 // q25.2
11725481_a_at	-0.0156984	-0.0553322	0.0185299	-0.00745296	0.116313	0.00745296	0.438399	0.274382	-1.03977	-0.0562712	1.03977	down	CD27	939	0006915 // apoptotic process // inferred from electronic annotation /// 0006916 // anti-apoptosis // inferred from direct assay /// 0006916 // anti-apoptosis // inferred from sequence or structural similarity /// 0006916 // anti-apoptosis // inferred from electronic annotation /// 0006917 // induction of apoptosis // inferred from direct assay /// 0006917 // induction of apoptosis // inferred fro…	0005576 // extracellular region // non-traceable author statement /// 0005624 // membrane fraction // inferred from electronic annotation /// 0005887 // integral to plasma membrane // non-traceable author statement /// 0009897 // external side of plasma membrane // inferred from electronic annotation /// 0009986 // cell surface // inferred from electronic annotation /// 0016020 // membrane // inf…	0004872 // receptor activity // inferred from electronic annotation /// 0004888 // transmembrane signaling receptor activity // non-traceable author statement /// 0005515 // protein binding // inferred from physical interaction /// 0043027 // cysteine-type endopeptidase inhibitor activity involved in apoptotic process // inferred from direct assay	chr12:6554005-6560879 (+) // 98.05 // p13.31
11747748_a_at	0.123522	-0.194822	0.0724101	-0.0130987	0.0130987	-0.263018	0.688331	0.541969	1.06293	0.0880427	1.06293	up	ETV1	2115	0006351 // transcription, DNA-dependent // inferred from electronic annotation /// 0006355 // regulation of transcription, DNA-dependent // traceable author statement /// 0006355 // regulation of transcription, DNA-dependent // inferred from electronic annotation /// 0006366 // transcription from RNA polymerase II promoter // traceable author statement /// 0048935 // peripheral nervous system neu…	0005634 // nucleus // inferred from electronic annotation	0003677 // DNA binding // inferred from electronic annotation /// 0003700 // sequence-specific DNA binding transcription factor activity // inferred from electronic annotation /// 0003700 // sequence-specific DNA binding transcription factor activity // traceable author statement /// 0005515 // protein binding // inferred from physical interaction /// 0043565 // sequence-specific DNA binding // i…	chr7:13935307-14026086 (-) // 98.49 // p21.2
11753489_a_at	-0.154162	-0.138292	-0.10322	0.10322	0.119589	0.171183	0.00487666	0.000490508	-1.20016	-0.263222	1.20016	down	EED	8726	0006349 // regulation of gene expression by genetic imprinting // inferred from electronic annotation /// 0006351 // transcription, DNA-dependent // inferred from electronic annotation /// 0006355 // regulation of transcription, DNA-dependent // inferred from electronic annotation /// 0016568 // chromatin modification // inferred from electronic annotation /// 0016571 // histone methylation // in…	0001739 // sex chromatin // inferred from electronic annotation /// 0005634 // nucleus // non-traceable author statement /// 0005634 // nucleus // inferred from electronic annotation /// 0005694 // chromosome // inferred from electronic annotation /// 0035098 // ESC/E(Z) complex // inferred from direct assay /// 0035098 // ESC/E(Z) complex // inferred from electronic annotation /// 0045120 // pro…	0003682 // chromatin binding // inferred from electronic annotation /// 0005515 // protein binding // inferred from physical interaction /// 0042054 // histone methyltransferase activity // inferred from direct assay /// 0042802 // identical protein binding // inferred from physical interaction	chr11:85956265-85988054 (+) // 99.75 // q14.2
11736030_a_at	0.0657825	0.00417519	-0.0248175	0.0679855	-0.00417519	-0.167104	0.689012	0.542854	1.03489	0.0494778	1.03489	up	SLC16A3	9123	0006090 // pyruvate metabolic process // traceable author statement /// 0006810 // transport // inferred from electronic annotation /// 0007596 // blood coagulation // traceable author statement /// 0015711 // organic anion transport // inferred from electronic annotation /// 0015718 // monocarboxylic acid transport // traceable author statement /// 0044281 // small molecule metabolic process // …	0005624 // membrane fraction // traceable author statement /// 0005886 // plasma membrane // inferred from direct assay /// 0005886 // plasma membrane // traceable author statement /// 0005886 // plasma membrane // inferred from electronic annotation /// 0005887 // integral to plasma membrane // traceable author statement /// 0015629 // actin cytoskeleton // inferred from direct assay /// 0016020…	0008028 // monocarboxylic acid transmembrane transporter activity // traceable author statement /// 0015293 // symporter activity // inferred from electronic annotation /// 0015355 // secondary active monocarboxylate transmembrane transporter activity // inferred from electronic annotation	chr17:80193855-80197354 (+) // 93.66 // q25.3
11759273_x_at	0.334323	-0.0242152	0.0575197	-0.20528	-0.0635855	0.0242155	0.332111	0.184508	1.15196	0.204093	1.15196	up	HIST1H2BC /// HIST1H2BE /// HIST1H2BF /// HIST1H2BG /// HIST1H2BI	8339 /// 8343 /// 8344 /// 8346 /// 8347	0006334 // nucleosome assembly // non-traceable author statement /// 0006334 // nucleosome assembly // inferred from electronic annotation /// 0042742 // defense response to bacterium // inferred from electronic annotation	0000786 // nucleosome // non-traceable author statement /// 0000786 // nucleosome // inferred from electronic annotation /// 0005634 // nucleus // inferred from electronic annotation /// 0005694 // chromosome // inferred from electronic annotation	0003677 // DNA binding // non-traceable author statement /// 0003677 // DNA binding // inferred from electronic annotation	chr6:26273143-26273640 (+) // 100.0 // p22.2
11720863_at	-0.00510597	-0.104488	-0.0653181	0.089426	0.00510597	0.101539	0.113057	0.0418971	-1.0895	-0.123661	1.0895	down	PNPLA4	8228	0006629 // lipid metabolic process // inferred from electronic annotation /// 0008152 // metabolic process // inferred from electronic annotation /// 0016042 // lipid catabolic process // inferred from electronic annotation		0004806 // triglyceride lipase activity // inferred from electronic annotation /// 0016787 // hydrolase activity // inferred from electronic annotation /// 0050253 // retinyl-palmitate esterase activity // inferred from electronic annotation	chrX:7866803-7895477 (-) // 83.75 // p22.31
11749228_a_at	-0.00947666	0.092371	0.00702953	0.0908661	-0.00702953	-0.157798	0.675662	0.526837	1.03859	0.0546283	1.03859	up	TMEM30A	55754	0036010 // protein localization in endosome // inferred from mutant phenotype /// 0070863 // positive regulation of protein exit from endoplasmic reticulum // inferred from direct assay	0005783 // endoplasmic reticulum // inferred from direct assay /// 0016020 // membrane // inferred from electronic annotation /// 0016021 // integral to membrane // inferred from electronic annotation	0005515 // protein binding // inferred from physical interaction	chr6:75965367-75994502 (-) // 93.61 // q14.1
11716184_s_at	0.0829487	0.120297	0.102902	-0.239396	-0.0829487	-0.107033	0.0328369	0.00792088	1.18524	0.245175	1.18524	up	ALCAM	214	0007155 // cell adhesion // inferred from electronic annotation /// 0007155 // cell adhesion // traceable author statement /// 0007165 // signal transduction // traceable author statement /// 0007411 // axon guidance // traceable author statement /// 0007411 // axon guidance // inferred from electronic annotation /// 0008045 // motor axon guidance // inferred from electronic annotation	0009897 // external side of plasma membrane // inferred from electronic annotation /// 0016020 // membrane // inferred from electronic annotation /// 0016021 // integral to membrane // inferred from electronic annotation /// 0030424 // axon // inferred from electronic annotation /// 0043025 // neuronal cell body // inferred from electronic annotation	0005102 // receptor binding // traceable author statement	chr3:105085712-105295746 (+) // 96.66 // q13.11
11727671_a_at	-0.216124	0.0312591	-0.298061	0.017204	-0.017204	0.0212219	0.310222	0.167273	-1.12354	-0.168049	1.12354	down	SYT17	51760	0006810 // transport // inferred from electronic annotation	0005802 // trans-Golgi network // inferred from electronic annotation /// 0008021 // synaptic vesicle // inferred from electronic annotation /// 0016020 // membrane // inferred from electronic annotation	0005215 // transporter activity // inferred from electronic annotation	chr16:19179534-19279656 (+) // 91.6 // p12.3
11724241_at	0.00514841	-0.107429	-0.00514793	-0.180203	0.0965042	0.133392	0.769689	0.644963	-1.03697	-0.0523735	1.03697	down	TCF4	6925	0000122 // negative regulation of transcription from RNA polymerase II promoter // inferred from electronic annotation /// 0006351 // transcription, DNA-dependent // inferred from electronic annotation /// 0006352 // transcription initiation, DNA-dependent // inferred from sequence or structural similarity /// 0006355 // regulation of transcription, DNA-dependent // inferred from electronic annot…	0005634 // nucleus // inferred from direct assay /// 0005634 // nucleus // inferred from electronic annotation /// 0005667 // transcription factor complex // inferred from sequence or structural similarity /// 0005667 // transcription factor complex // inferred from electronic annotation	0000978 // RNA polymerase II core promoter proximal region sequence-specific DNA binding // inferred from sequence or structural similarity /// 0001011 // sequence-specific DNA binding RNA polymerase recruiting transcription factor activity // inferred from sequence or structural similarity /// 0001077 // RNA polymerase II core promoter proximal region sequence-specific DNA binding transcription …	chr18:52889564-53255860 (-) // 95.08 // q21.2
[truncated: 48,951 more rows]

## Sheet: Diff Genes Number
NO	Comparison	Up-regulated	Down-regulated
1	KD vs NC	283	252

## Sheet: Differential Data
Probe	KD	KD	KD	NC	NC	NC	P-value	P-value	Fold change	Fold change	Fold change	Fold change	Annotation	Annotation	Annotation	Annotation	Annotation	Annotation
[truncated: 536 more rows]

[truncated: 4 more sheets: Diff Data(UP), Diff Data(Down), Raw_Data, ReadMe]
