# Supplementary material for: SKA1 promotes tumor metastasis via SAFB-mediated transcription repression of DUSP6 in clear cell renal cell carcinoma
Source: Aging (Albany NY). 2022 Dec 2;14(23):9679–98. doi: 10.18632/aging.204418 (PMC9792197; doi:10.18632/aging.204418)
Supplement: Supplementary Table 3B [file aging-14-204418-s005.xlsx]

## Sheet: Canonical_Pathway
Supplementary Table 3B. Excel file of diseases or functions clustering analysis from the 535 differentially expressed genes.
Ingenuity Canonical Pathways	-log(p-value)	Ratio	z-score	Molecules	Counts of AntibodyList
GNRH Signaling	0.791	0.0388	-2.236	PLCB4,PRKAR2B,EGR1,MAP3K1,ADCY7	1
CREB Signaling in Neurons	0.64	0.0326	-2.236	PLCB4,PRKAR2B,GAB1,FGFR2,ADCY7,GNG12	1
PEDF Signaling	1.4	0.0595	-2	ARHGAP22,SOD2,GAB1,NFKBIE,FGFR2	1
EGF Signaling	1.18	0.0588	-2	GAB1,MAP3K1,FGFR2,STAT1	2
CDK5 Signaling	1.15	0.0505	-2	PRKAR2B,EGR1,ITGA2,PPP2R1B,ADCY7	2
RANK Signaling in Osteoclasts	1.12	0.0495	-2	GAB1,NFKBIE,MAP3K1,TAB2,FGFR2	1
PDGF Signaling	0.848	0.0444	-2	GAB1,MAP3K1,FGFR2,STAT1	2
Neuropathic Pain Signaling In Dorsal Horn Neurons	0.602	0.0351	-2	PLCB4,PRKAR2B,GAB1,FGFR2	1
Cardiac Hypertrophy Signaling	1.77	0.0468	-1.897	ADSS,PLCB4,PRKAR2B,GAB1,RHOB,MEF2D,MAP3K1,FGFR2,IL6,ADCY7,GNG12	2
Role of NFAT in Cardiac Hypertrophy	1.95	0.0521	-1.667	RCAN1,PLCB4,PRKAR2B,GAB1,MEF2D,MAP3K1,FGFR2,IL6,ADCY7,GNG12	2
Nitric Oxide Signaling in the Cardiovascular System	1.87	0.0619	-1.633	PRKAR2B,GAB1,PRKAA1,VEGFC,FGFR2,ARG2,GUCY1B3	3
Melanocyte Development and Pigmentation Signaling	1.71	0.0632	-1.633	KITLG,PRKAR2B,GAB1,FGFR2,RPS6KA5,ADCY7	3
Gαq Signaling	1.56	0.05	-1.633	HMOX1,PLCB4,GAB1,RHOB,NFKBIE,RGS4,FGFR2,GNG12	1
Antioxidant Action of Vitamin C	1.55	0.0583	-1.633	HMOX1,PLA2G4A,PLCB4,NFKBIE,CSF2,TNF	0
P2Y Purigenic Receptor Signaling Pathway	1.54	0.053	-1.633	P2RY2,PLCB4,PRKAR2B,GAB1,FGFR2,ADCY7,GNG12	1
Tec Kinase Signaling	1.43	0.0471	-1.633	GAB1,RHOB,VAV3,ITGA2,FGFR2,STAT1,TNF,GNG12	3
Sphingosine-1-phosphate Signaling	1.25	0.0492	-1.633	PLCB4,GAB1,RHOB,S1PR1,FGFR2,ADCY7	1
CXCR4 Signaling	1.11	0.0424	-1.633	PLCB4,GAB1,RHOB,EGR1,FGFR2,ADCY7,GNG12	2
Growth Hormone Signaling	1.46	0.0617	-1.342	GAB1,IGFBP3,FGFR2,RPS6KA5,STAT1	4
JAK/Stat Signaling	1.42	0.0602	-1.342	GAB1,CDKN1A,FGFR2,IL6,STAT1	4
fMLP Signaling in Neutrophils	1.27	0.0496	-1.342	PLCB4,GAB1,NFKBIE,NCF2,FGFR2,GNG12	1
UVA-Induced MAPK Signaling	1.11	0.049	-1.342	PLCB4,GAB1,FGFR2,RPS6KA5,STAT1	3
SAPK/JNK Signaling	1.08	0.0481	-1.342	GAB1,MAP3K1,ZAK,FGFR2,MAP4K4	2
Role of NFAT in Regulation of the Immune Response	0.935	0.0383	-1.342	RCAN1,PLCB4,GAB1,NFKBIE,MEF2D,FGFR2,GNG12	1
AMPK Signaling	0.882	0.037	-1.342	PRKAR2B,GAB1,CDKN1A,PRKAA1,FGFR2,AK4,PPP2R1B	3
Sperm Motility	0.83	0.04	-1.342	PLA2G4A,PLCB4,PRKAR2B,TWF1,GUCY1B3	0
Dopamine-DARPP32 Feedback in cAMP Signaling	0.81	0.037	-1.342	PLCB4,PRKAR2B,KCNJ16,PPP2R1B,ADCY7,GUCY1B3	0
PKCθ Signaling in T Lymphocytes	0.781	0.0385	-1.342	GAB1,VAV3,NFKBIE,MAP3K1,FGFR2	1
Actin Cytoskeleton Signaling	0.605	0.0307	-1.342	GAB1,VAV3,ITGA2,FGFR2,GNG12,FGF1,FGF5	2
Thrombin Signaling	0.522	0.0296	-1.342	PLCB4,GAB1,RHOB,FGFR2,ADCY7,GNG12	1
NF-κB Signaling	3.13	0.0667	-1.155	TLR2,CD40,GAB1,UBE2N,NFKBIE,PELI1,MAP3K1,TAB2,TNFAIP3,FGFR2,TNF,MAP4K4	2
eNOS Signaling	1.63	0.0516	-1.134	PRKAR2B,GAB1,HSPA9,PRKAA1,VEGFC,FGFR2,ADCY7,GUCY1B3	3
Glioblastoma Multiforme Signaling	1.18	0.044	-1.134	FZD8,PLCB4,GAB1,RHOB,CDKN1A,FGFR2,WNT5A	3
Integrin Signaling	0.928	0.0365	-1.134	ARHGAP26,GAB1,RHOB,ITGA2,TSPAN2,FGFR2,ITGB6,RAP1A	3
IL-17A Signaling in Airway Cells	3.5	0.104	-1	CXCL3,GAB1,NFKBIE,CCL20,FGFR2,CXCL1,CXCL5,IL6	3
IL-9 Signaling	1.75	0.0889	-1	GAB1,FGFR2,STAT1,TNF	2
B Cell Receptor Signaling	1.63	0.0486	-1	ETS1,GAB1,VAV3,EGR1,NFKBIE,MAP3K1,FGFR2,BCL2A1,RAP1A	4
Role of PI3K/AKT Signaling in the Pathogenesis of Influenza	1.56	0.0658	-1	GAB1,NFKBIE,FGFR2,CCL5,PLAC8	1
Fc Epsilon RI Signaling	1.3	0.0504	-1	PLA2G4A,GAB1,VAV3,FGFR2,CSF2,TNF	1
CNTF Signaling	1.28	0.0635	-1	GAB1,FGFR2,RPS6KA5,STAT1	3
FLT3 Signaling in Hematopoietic Progenitor Cells	0.913	0.0471	-1	GAB1,FGFR2,RPS6KA5,STAT1	3
G Beta Gamma Signaling	0.874	0.0455	-1	PRKAR2B,CAV2,HBEGF,GNG12	0
Protein Kinase A Signaling	0.784	0.0308	-1	PLCB4,ADD3,PRKAR2B,PTPN13,DUSP6,NFKBIE,MAP3K1,PTCH1,ADCY7,PTPRR,RAP1A,GNG12	2
Mouse Embryonic Stem Cell Pluripotency	0.674	0.0377	-1	FZD8,ID1,GAB1,FGFR2	2
p70S6K Signaling	0.475	0.0305	-1	PLCB4,GAB1,FGFR2,PPP2R1B	1
IL-1 Signaling	2.37	0.0769	-0.816	PRKAR2B,NFKBIE,MAP3K1,TAB2,ADCY7,GNG12,IRAK2	1
GM-CSF Signaling	2.24	0.0822	-0.816	ETS1,GAB1,FGFR2,STAT1,CSF2,BCL2A1	3
Gα12/13 Signaling	1.57	0.0538	-0.816	GAB1,VAV3,NFKBIE,MEF2D,MAP3K1,CDH6,FGFR2	1
Signaling by Rho Family GTPases	0.503	0.0283	-0.816	GAB1,RHOB,NCF2,ITGA2,CDH6,FGFR2,GNG12	2
cAMP-mediated signaling	0.911	0.0362	-0.707	PRKAR2B,DUSP6,S1PR1,RGS4,ADORA2B,PTGER2,ADCY7,RAP1A	2
NF-κB Activation by Viruses	1.36	0.0581	-0.447	GAB1,NFKBIE,ITGA2,MAP3K1,FGFR2	2
Gαi Signaling	1.28	0.05	-0.447	PRKAR2B,S1PR1,RGS4,ADCY7,RAP1A,GNG12	1
Rac Signaling	0.917	0.0427	-0.447	GAB1,NCF2,ITGA2,MAP3K1,FGFR2	2
NGF Signaling	0.917	0.0427	-0.447	GAB1,MAP3K1,FGFR2,RPS6KA5,RAP1A	3
HGF Signaling	3.59	0.087	-0.378	ETS1,ELF3,GAB1,CDKN1A,ITGA2,MAP3K1,FGFR2,IL6,RAP1A,ELK3	6
CD40 Signaling	3.46	0.103	-0.378	ICAM1,CD40,GAB1,NFKBIE,PTGS1,TNFAIP3,FGFR2,TRAF1	2
LXR/RXR Activation	2.8	0.0744	-0.333	LY96,C3,CCL2,SAA1,ARG2,SAA2,IL6,TNF,MMP9	3
Production of Nitric Oxide and Reactive Oxygen Species in Macrophages	2.86	0.0622	-0.302	TLR2,GAB1,RHOB,NFKBIE,NCF2,MAP3K1,FGFR2,ARG2,STAT1,PPP2R1B,TNF,RAP1A	3
Telomerase Signaling	2.46	0.0721	0	ETS1,ELF3,GAB1,CDKN1A,FGFR2,PPP2R1B,TERF1,ELK3	3
Glioma Invasiveness Signaling	2.33	0.0857	0	GAB1,RHOB,PLAUR,FGFR2,PLAU,MMP9	2
Gαs Signaling	1.95	0.0642	0	ADD3,PRKAR2B,ADORA2B,PTGER2,ADCY7,RAP1A,GNG12	1
FGF Signaling	1.81	0.0667	0	GAB1,MAP3K1,FGFR2,RPS6KA5,FGF1,FGF5	2
Ceramide Signaling	1.75	0.0645	0	GAB1,MAP3K1,S1PR1,FGFR2,PPP2R1B,TNF	1
ILK Signaling	1.49	0.0459	0	GAB1,RHOB,VEGFC,FGFR2,RPS6KA5,ITGB6,PPP2R1B,TNF,MMP9	4
Renal Cell Carcinoma Signaling	1.46	0.0617	0	ETS1,GAB1,FGFR2,EGLN3,RAP1A	3
Corticotropin Releasing Hormone Signaling	1.42	0.0541	0	PRKAR2B,MEF2D,PTCH1,ADCY7,RAP1A,GUCY1B3	1
VEGF Family Ligand-Receptor Interactions	1.33	0.0568	0	PLA2G4A,NRP2,GAB1,VEGFC,FGFR2	2
Type II Diabetes Mellitus Signaling	1.19	0.0472	0	GAB1,NFKBIE,MAP3K1,PRKAA1,FGFR2,TNF	2
PAK Signaling	0.723	0.0396	0	GAB1,ITGA2,FGFR2,TNF	2
Regulation of eIF4 and p70S6K Signaling	0.563	0.0318	0	GAB1,ITGA2,FGFR2,PPP2R1B,RPSA	2
Synaptic Long Term Depression	0.386	0.0274	0	PLA2G4A,PLCB4,PPP2R1B,GUCY1B3	0
Colorectal Cancer Metastasis Signaling	4.92	0.0729	0.243	MMP7,MMP14,FGFR2,VEGFC,IL6,TLR2,FZD8,PRKAR2B,RHOB,GAB1,PTGER2,STAT1,TNF,ADCY7,GNG12,MMP9,MMP1,WNT5A	8
ERK/MAPK Signaling	3.26	0.0653	0.277	ETS1,DUSP6,ITGA2,FGFR2,RPS6KA5,RAP1A,PLA2G4A,PRKAR2B,ELF3,GAB1,STAT1,PPP2R1B,ELK3	7
mTOR Signaling	1.46	0.0452	0.378	HMOX1,GAB1,RHOB,PRKAA1,VEGFC,FGFR2,RPS6KA5,PPP2R1B,RPSA	4
Lymphotoxin β Receptor Signaling	1.77	0.0746	0.447	GAB1,LTB,FGFR2,CXCL1,TRAF1	2
PI3K Signaling in B Lymphocytes	0.8	0.0391	0.447	PLCB4,C3,CD40,VAV3,NFKBIE	0
Pancreatic Adenocarcinoma Signaling	2.3	0.0678	0.707	HMOX1,GAB1,CDKN1A,VEGFC,FGFR2,HBEGF,STAT1,MMP9	5
Toll-like Receptor Signaling	4.41	0.122	0.816	TLR2,LY96,MAP3K1,TAB2,TNFAIP3,TNF,MAP4K4,IRAK2,TRAF1	2
Acute Phase Response Signaling	2.32	0.0592	0.816	HMOX1,SOD2,C3,SAA1,NFKBIE,MAP3K1,SAA2,IL6,TNF,SERPIND1	1
Leukocyte Extravasation Signaling	2.11	0.0524	0.905	MMP7,ICAM1,GAB1,MMP14,VAV3,NCF2,ITGA2,FGFR2,RAP1A,MMP9,MMP1	6
Activation of IRF by Cytosolic Pattern Recognition Receptors	5.05	0.145	1	IFIH1,CD40,NFKBIE,DDX58,MAVS,IRF9,IL6,STAT1,TNF	4
Endothelin-1 Signaling	2.02	0.0535	1	HMOX1,PLA2G4A,PLCB4,GAB1,PTGS1,FGFR2,ECE1,PTGER2,ADCY7,GUCY1B3	1
NRF2-mediated Oxidative Stress Response	1.93	0.0518	1	HMOX1,SOD2,GAB1,GSTA4,MAP3K1,FGFR2,HERPUD1,DNAJB6,DNAJB9,MAFF	1
Ephrin Receptor Signaling	1.79	0.0517	1	EPHB1,RGS3,PTPN13,ITGA2,VEGFC,MAP4K4,RAP1A,GNG12,FGF1	3
PI3K/AKT Signaling	1.23	0.0484	1	GAB1,NFKBIE,GDF15,CDKN1A,ITGA2,PPP2R1B	2
Phospholipase C Signaling	1.07	0.038	1	HMOX1,PLA2G4A,PLCB4,RHOB,MEF2D,ITGA2,ADCY7,RAP1A,GNG12	2
p53 Signaling	0.988	0.045	1	CCNG1,GAB1,CDKN1A,FGFR2,HIPK2	2
Death Receptor Signaling	0.824	0.0435	1	NFKBIE,TNF,MAP4K4,ARHGDIB	0
PTEN Signaling	0.561	0.0336	1	CDKN1A,ITGA2,FGFR2,CNKSR3	3
Wnt/β-catenin Signaling	0.487	0.0296	1	FZD8,SFRP4,MMP7,PPP2R1B,WNT5A	2
RhoGDI Signaling	0.464	0.0289	1	RHOB,ITGA2,CDH6,GNG12,ARHGDIB	1
p38 MAPK Signaling	1.8	0.0598	1.134	PLA2G4A,MEF2D,TAB2,RPS6KA5,STAT1,TNF,IRAK2	3
IL-6 Signaling	1.62	0.0551	1.134	CXCL8,GAB1,NFKBIE,FGFR2,IL6,TNF,MAP4K4	3
HMGB1 Signaling	3.09	0.0752	1.265	CXCL8,ICAM1,CCL2,GAB1,RHOB,FGFR2,IL6,CSF2,TNF,PLAT	4
Dendritic Cell Maturation	3.45	0.0684	1.387	TLR2,PLCB4,ICAM1,CD40,GAB1,NFKBIE,FGFR2,LTB,CD83,IL6,CSF2,STAT1,TNF	3
Role of Pattern Recognition Receptors in Recognition of Bacteria and Viruses	7.14	0.117	1.508	PTX3,CXCL8,OAS1,NLRP3,C3,FGFR2,IL6,CCL5,OAS3,TLR2,IFIH1,GAB1,DDX58,MAVS,CSF2,TNF	5
Coagulation System	3.95	0.171	1.633	PLAUR,PLAU,THBD,F3,PLAT,SERPIND1	1
IL-8 Signaling	3.84	0.0711	1.941	CXCL8,ICAM1,VEGFC,FGFR2,HBEGF,HMOX1,RHOB,GAB1,NCF2,CXCL1,MAP4K4,GNG12,MMP9,IRAK2	6
VDR/RXR Activation	3.46	0.103	2.236	COL13A1,CDKN1A,IGFBP3,VDR,CCL5,THBD,CSF2,KLF4	3
Role of IL-17F in Allergic Inflammatory Airway Diseases	4.31	0.159	2.646	CXCL8,CCL2,RPS6KA5,CXCL1,CXCL5,IL6,CSF2	5
TREM1 Signaling	6.09	0.147	3.317	TLR2,CXCL8,CXCL3,ICAM1,NLRP3,CCL2,CD40,CD83,IL6,CSF2,TNF	3
Hepatic Fibrosis / Hepatic Stellate Cell Activation	7.52	0.104	NaN	CXCL8,ICAM1,FGFR2,VEGFC,IL6,CCL5,COL17A1,FGF1,CXCL3,LY96,CCL2,CD40,COL13A1,IGFBP3,ECE1,STAT1,TNF,MMP9,MMP1	9
Role of IL-17A in Arthritis	6.6	0.164	NaN	CXCL8,CXCL3,CCL2,GAB1,NFKBIE,CCL20,FGFR2,CXCL1,CXCL5,CCL5,MMP1	5
Airway Pathology in Chronic Obstructive Pulmonary Disease	6.54	0.625	NaN	CXCL8,CXCL3,TNF,MMP9,MMP1	3
Agranulocyte Adhesion and Diapedesis	5.9	0.0899	NaN	CXCL8,CXCL11,MMP7,ICAM1,MMP14,ITGA2,CCL20,CXCL5,CCL5,CXCL3,CCL2,PODXL,CXCL1,CXCL2,TNF,MMP9,MMP1	8
Differential Regulation of Cytokine Production in Macrophages and T Helper Cells by IL-17A and IL-17F	5.75	0.333	NaN	CCL2,CXCL1,CCL5,IL6,CSF2,TNF	3
Glucocorticoid Receptor Signaling	5.67	0.0732	NaN	CXCL8,CDKN1C,ICAM1,NFKBIE,HSPA9,MAP3K1,FGFR2,IL6,CCL5,TAF13,TAF9B,CXCL3,CCL2,GAB1,CDKN1A,PRKAA1,PLAU,CSF2,STAT1,TNF,MMP1	9
Granulocyte Adhesion and Diapedesis	5.62	0.0904	NaN	CXCL8,CXCL11,MMP7,ICAM1,MMP14,ITGA2,CCL20,CXCL5,CCL5,CXCL3,CCL2,CXCL1,CXCL2,TNF,MMP9,MMP1	8
Role of Tissue Factor in Cancer	5.46	0.107	NaN	CXCL8,GAB1,EGR1,HBEGF,FGFR2,VEGFC,PLAUR,CXCL1,RPS6KA5,CSF2,F3,MMP1,FGF5	8
Role of IL-17A in Psoriasis	5.22	0.385	NaN	CXCL8,CXCL3,CCL20,CXCL1,CXCL5	2
IL-17A Signaling in Gastric Cells	4.83	0.24	NaN	CXCL8,CXCL11,CCL20,CXCL1,CCL5,TNF	2
Role of Macrophages, Fibroblasts and Endothelial Cells in Rheumatoid Arthritis	4.64	0.0647	NaN	CXCL8,SFRP4,ICAM1,NFKBIE,FGFR2,LTB,VEGFC,IL6,CCL5,TLR2,FZD8,PLCB4,CCL2,GAB1,CSF2,TNF,MMP1,WNT5A,IRAK2,TRAF1	8
Bladder Cancer Signaling	4.62	0.115	NaN	CXCL8,MMP7,MMP14,CDKN1A,VEGFC,RPS6KA5,MMP9,MMP1,FGF1,FGF5	7
Differential Regulation of Cytokine Production in Intestinal Epithelial Cells by IL-17A and IL-17F	3.88	0.217	NaN	CCL2,CXCL1,CCL5,CSF2,TNF	2
Axonal Guidance Signaling	3.7	0.0513	NaN	MMP7,PAPPA,RGS3,NRP2,PTCH1,SEMA6A,ITGA2,FGFR2,VEGFC,ADAMTS9,RAP1A,SEMA3A,FZD8,PLCB4,EPHB1,SEMA6D,PRKAR2B,GAB1,SEMA3C,MMP9,GNG12,WNT5A,SEMA7A	7
Renin-Angiotensin Signaling	3.44	0.0833	NaN	PRKAR2B,CCL2,GAB1,MAP3K1,FGFR2,PTGER2,CCL5,STAT1,ADCY7,TNF	3
TNFR2 Signaling	3.38	0.172	NaN	NFKBIE,MAP3K1,TNFAIP3,TNF,TRAF1	1
Atherosclerosis Signaling	3.25	0.0787	NaN	CXCL8,PLA2G4A,ICAM1,CCL2,CD40,IL6,F3,TNF,MMP9,MMP1	6
IL-17 Signaling	3.21	0.0941	NaN	CXCL8,CXCL11,CCL2,GAB1,FGFR2,CXCL1,CXCL5,IL6	5
Communication between Innate and Adaptive Immune Cells	3.08	0.0899	NaN	TLR2,CXCL8,CD40,CD83,CCL5,IL6,CSF2,TNF	2
IL-17A Signaling in Fibroblasts	3	0.143	NaN	CCL2,NFKBIE,CXCL5,IL6,MMP1	3
Role of Osteoblasts, Osteoclasts and Chondrocytes in Rheumatoid Arthritis	2.65	0.056	NaN	FZD8,SFRP4,GAB1,MMP14,NFKBIE,ITGA2,TAB2,FGFR2,IL6,CSF2,TNF,MMP1,WNT5A	5
Role of Hypercytokinemia/hyperchemokinemia in the Pathogenesis of Influenza	2.59	0.116	NaN	CXCL8,CCL2,CCL5,IL6,TNF	3
Guanosine Nucleotides Degradation III	2.57	0.231	NaN	NT5E,XDH,PNP	0
Urate Biosynthesis/Inosine 5'-phosphate Degradation	2.48	0.214	NaN	NT5E,XDH,PNP	0
IL-10 Signaling	2.39	0.0882	NaN	HMOX1,NFKBIE,ARG2,IL6,TNF,MAP4K4	1
HIF1α Signaling	2.37	0.0696	NaN	MMP7,GAB1,MMP14,VEGFC,FGFR2,EGLN3,MMP9,MMP1	5
Ovarian Cancer Signaling	2.29	0.0625	NaN	FZD8,MMP7,PRKAR2B,GAB1,PTGS1,VEGFC,FGFR2,MMP9,WNT5A	5
Adenosine Nucleotides Degradation II	2.23	0.176	NaN	NT5E,XDH,PNP	0
Relaxin Signaling	2.18	0.06	NaN	PRKAR2B,GAB1,NFKBIE,FGFR2,ADCY7,RAP1A,MMP9,GNG12,GUCY1B3	3
Retinoate Biosynthesis I	2.18	0.118	NaN	DHRS3,ALDH1A1,RDH10,AKR1B10	0
IL-15 Signaling	2.15	0.0789	NaN	CXCL8,GAB1,FGFR2,IL6,CSF2,TNF	3
Interferon Signaling	2.09	0.111	NaN	OAS1,IRF9,STAT1,TAP1	1
Purine Nucleotides Degradation II (Aerobic)	2.02	0.15	NaN	NT5E,XDH,PNP	0
Hepatic Cholestasis	2.02	0.0566	NaN	CXCL8,LY96,PRKAR2B,NFKBIE,IL6,CSF2,ADCY7,TNF,IRAK2	3
MSP-RON Signaling Pathway	2	0.0847	NaN	TLR2,CCL2,GAB1,FGFR2,TNF	2
Regulation of the Epithelial-Mesenchymal Transition Pathway	1.99	0.0529	NaN	ETS1,FZD8,GAB1,EGR1,FGFR2,MMP9,HMGA2,WNT5A,FGF1,FGF5	5
Inhibition of Matrix Metalloproteases	1.96	0.103	NaN	MMP7,MMP14,MMP9,MMP1	3
Role of PKR in Interferon Induction and Antiviral Response	1.93	0.1	NaN	NFKBIE,TAB2,STAT1,TNF	1
Neuroprotective Role of THOP1 in Alzheimer's Disease	1.93	0.1	NaN	PRKAR2B,NFYA,ECE1,MMP9	1
Altered T Cell and B Cell Signaling in Rheumatoid Arthritis	1.86	0.0682	NaN	TLR2,CD40,LTB,IL6,CSF2,TNF	1
Crosstalk between Dendritic Cells and Natural Killer Cells	1.83	0.0674	NaN	CD40,LTB,CD83,IL6,CSF2,TNF	1
Role of RIG1-like Receptors in Antiviral Innate Immunity	1.82	0.093	NaN	IFIH1,NFKBIE,DDX58,MAVS	2
CDP-diacylglycerol Biosynthesis I	1.8	0.125	NaN	ABHD5,LCLAT1,CRLS1	0
Pathogenesis of Multiple Sclerosis	1.79	0.222	NaN	CXCL11,CCL5	0
Prostanoid Biosynthesis	1.79	0.222	NaN	PTGIS,PTGS1	0
iNOS Signaling	1.78	0.0909	NaN	LY96,NFKBIE,STAT1,IRAK2	2
Eicosanoid Signaling	1.77	0.0746	NaN	PTGIS,PLA2G4A,PTGS1,ALOX5AP,PTGER2	0
G-Protein Coupled Receptor Signaling	1.73	0.0444	NaN	PLCB4,PRKAR2B,GAB1,DUSP6,NFKBIE,S1PR1,RGS4,FGFR2,ADORA2B,PTGER2,ADCY7,RAP1A	3
Phosphatidylglycerol Biosynthesis II (Non-plastidic)	1.71	0.115	NaN	ABHD5,LCLAT1,CRLS1	0
Hematopoiesis from Pluripotent Stem Cells	1.69	0.0851	NaN	KITLG,CXCL8,IL6,CSF2	3
Molecular Mechanisms of Cancer	1.67	0.0401	NaN	NFKBIE,ITGA2,TAB2,PTCH1,FGFR2,RAP1A,FZD8,PLCB4,PRKAR2B,RHOB,GAB1,CDKN1A,HIPK2,ADCY7,WNT5A	5
IL-15 Production	1.66	0.111	NaN	TWF1,IL6,STAT1	2
Xanthine and Xanthosine Salvage	1.65	1	NaN	PNP	0
TNFR1 Signaling	1.63	0.0816	NaN	NFKBIE,MAP3K1,TNFAIP3,TNF	1
Antiproliferative Role of Somatostatin Receptor 2	1.58	0.0667	NaN	GAB1,CDKN1A,FGFR2,GNG12,GUCY1B3	2
RAR Activation	1.57	0.0474	NaN	DHRS3,ALDH1A1,PRKAR2B,RDH10,MAP3K1,IGFBP3,NR2F6,ADCY7,MMP1	2
Hematopoiesis from Multipotent Stem Cells	1.55	0.167	NaN	KITLG,CSF2	1
Role of Cytokines in Mediating Communication between Immune Cells	1.49	0.0741	NaN	CXCL8,IL6,CSF2,TNF	2
Choline Biosynthesis III	1.48	0.154	NaN	HMOX1,CHPT1	0
MIF-mediated Glucocorticoid Regulation	1.44	0.0909	NaN	PLA2G4A,LY96,NFKBIE	0
Oncostatin M Signaling	1.4	0.0882	NaN	PLAU,STAT1,MMP1	2
Leptin Signaling in Obesity	1.38	0.0588	NaN	PLCB4,PRKAR2B,GAB1,FGFR2,ADCY7	1
Guanine and Guanosine Salvage I	1.36	0.5	NaN	PNP	0
4-hydroxyproline Degradation I	1.36	0.5	NaN	HOGA1	0
Adenine and Adenosine Salvage I	1.36	0.5	NaN	PNP	0
PPARα/RXRα Activation	1.33	0.0449	NaN	PLCB4,PRKAR2B,GPD2,NFKBIE,PRKAA1,IL6,ADCY7,MAP4K4	2
HER-2 Signaling in Breast Cancer	1.33	0.0568	NaN	GAB1,CDKN1A,FGFR2,ITGB6,AREG	2
Extrinsic Prothrombin Activation Pathway	1.31	0.125	NaN	THBD,F3	1
April Mediated Signaling	1.28	0.0789	NaN	NFKBIE,MAP3K1,TRAF1	0
phagosome formation	1.25	0.0492	NaN	TLR2,PLCB4,GAB1,RHOB,ITGA2,FGFR2	2
Xenobiotic Metabolism Signaling	1.24	0.0385	NaN	HMOX1,CHST1,ALDH1A1,GAB1,GSTA4,MAP3K1,FGFR2,IL6,PPP2R1B,TNF,IL4I1	2
PXR/RXR Activation	1.24	0.0615	NaN	ALDH1A1,PRKAR2B,IL6,TNF	1
B Cell Activating Factor Signaling	1.23	0.075	NaN	NFKBIE,MAP3K1,TRAF1	0
MIF Regulation of Innate Immunity	1.2	0.0732	NaN	PLA2G4A,LY96,NFKBIE	0
TR/RXR Activation	1.17	0.051	NaN	UCP2,GAB1,FGFR2,ME1,THRB	1
The Visual Cycle	1.14	0.1	NaN	DHRS3,RDH10	0
T Helper Cell Differentiation	1.13	0.0563	NaN	CD40,IL6,STAT1,TNF	2
Triacylglycerol Biosynthesis	1.13	0.0682	NaN	ABHD5,LCLAT1,CRLS1	0
Role of MAPK Signaling in the Pathogenesis of Influenza	1.11	0.0556	NaN	PLA2G4A,CCL2,CCL5,TNF	1
Tryptophan Degradation III (Eukaryotic)	1.1	0.0952	NaN	KMO,HSD17B4	0
Inflammasome pathway	1.1	0.0952	NaN	CXCL8,NLRP3	1
Ephrin B Signaling	1.1	0.0548	NaN	EPHB1,RGS3,VAV3,GNG12	0
Breast Cancer Regulation by Stathmin1	1.07	0.0394	NaN	PLCB4,PRKAR2B,GAB1,CDKN1A,FGFR2,PPP2R1B,ADCY7,GNG12	2
Airway Inflammation in Asthma	1.06	0.25	NaN	TNF	0
Arsenate Detoxification I (Glutaredoxin)	1.06	0.25	NaN	PNP	0
Heme Degradation	1.06	0.25	NaN	HMOX1	0
PRPP Biosynthesis I	1.06	0.25	NaN	PRPS2	0
Myo-inositol Biosynthesis	1.06	0.25	NaN	IMPA2	0
Glycerol-3-phosphate Shuttle	1.06	0.25	NaN	GPD2	0
Melatonin Degradation II	1.06	0.25	NaN	IL4I1	0
Arginine Degradation I (Arginase Pathway)	1.06	0.25	NaN	ARG2	0
Primary Immunodeficiency Signaling	1.04	0.0625	NaN	CD40,TAP1,UNG	0
Pyrimidine Deoxyribonucleotides De Novo Biosynthesis I	1.03	0.087	NaN	DUT,AK4	0
Putrescine Degradation III	1.03	0.087	NaN	ALDH1A1,IL4I1	0
Dopamine Receptor Signaling	1.03	0.0519	NaN	PRKAR2B,PPP2R1B,ADCY7,IL4I1	0
Chondroitin Sulfate Biosynthesis (Late Stages)	1.02	0.0612	NaN	CHST1,CSGALNACT2,CHST9	0
Tumoricidal Function of Hepatic Natural Killer Cells	1	0.0833	NaN	ICAM1,SRGN	0
Human Embryonic Stem Cell Pluripotency	0.995	0.042	NaN	FZD8,GAB1,S1PR1,FGFR2,INHBA,WNT5A	2
Role of JAK family kinases in IL-6-type Cytokine Signaling	0.973	0.08	NaN	IL6,STAT1	2
Tryptophan Degradation X (Mammalian, via Tryptamine)	0.973	0.08	NaN	ALDH1A1,IL4I1	0
Creatine-phosphate Biosynthesis	0.972	0.2	NaN	MAP4K4	0
Tetrahydrofolate Salvage from 5,10-methenyltetrahydrofolate	0.972	0.2	NaN	MTHFD2L	0
IL-12 Signaling and Production in Macrophages	0.963	0.0411	NaN	TLR2,CD40,GAB1,FGFR2,STAT1,TNF	2
Docosahexaenoic Acid (DHA) Signaling	0.96	0.0577	NaN	GAB1,FGFR2,BCL2A1	1
Semaphorin Signaling in Neurons	0.941	0.0566	NaN	SEMA3A,RHOB,SEMA7A	0
Small Cell Lung Cancer Signaling	0.927	0.0476	NaN	GAB1,NFKBIE,FGFR2,TRAF1	1
Unfolded protein response	0.923	0.0556	NaN	HSPA9,CD82,DNAJB9	0
GPCR-Mediated Nutrient Sensing in Enteroendocrine Cells	0.913	0.0471	NaN	PLCB4,PRKAR2B,ADCY7,GNG12	0
Melanoma Signaling	0.906	0.0545	NaN	GAB1,CDKN1A,FGFR2	2
Urea Cycle	0.898	0.167	NaN	ARG2	0
Chondroitin and Dermatan Biosynthesis	0.898	0.167	NaN	CSGALNACT2	0
Arginine Degradation VI (Arginase 2 Pathway)	0.898	0.167	NaN	ARG2	0
Glycerol Degradation I	0.898	0.167	NaN	GPD2	0
Molybdenum Cofactor Biosynthesis	0.898	0.167	NaN	GPHN	0
Wnt/Ca+ pathway	0.872	0.0526	NaN	FZD8,PLCB4,WNT5A	1
Apoptosis Signaling	0.861	0.0449	NaN	NFKBIE,BCL2A1,TNF,MAP4K4	0
Chondroitin Sulfate Biosynthesis	0.856	0.0517	NaN	CHST1,CSGALNACT2,CHST9	0
Sonic Hedgehog Signaling	0.842	0.0667	NaN	PRKAR2B,PTCH1	0
Phosphatidylcholine Biosynthesis I	0.835	0.143	NaN	CHPT1	0
Adenine and Adenosine Salvage III	0.835	0.143	NaN	PNP	0
Induction of Apoptosis by HIV1	0.824	0.05	NaN	NFKBIE,TNF,TRAF1	0
Ephrin A Signaling	0.824	0.05	NaN	GAB1,VAV3,FGFR2	1
Reelin Signaling in Neurons	0.824	0.0435	NaN	NDEL1,GAB1,ITGA2,FGFR2	2
4-1BB Signaling in T Lymphocytes	0.819	0.0645	NaN	NFKBIE,TRAF1	0
Prostate Cancer Signaling	0.8	0.0426	NaN	GAB1,NFKBIE,CDKN1A,FGFR2	2
G Protein Signaling Mediated by Tubby	0.798	0.0625	NaN	PLCB4,GNG12	0
Pyrimidine Ribonucleotides Interconversion	0.798	0.0625	NaN	AK4,ENTPD7	0
Phospholipases	0.795	0.0484	NaN	HMOX1,PLA2G4A,PLCB4	0
Sphingosine and Sphingosine-1-phosphate Metabolism	0.782	0.125	NaN	SGPP2	0
Histidine Degradation III	0.782	0.125	NaN	MTHFD2L	0
Citrulline Biosynthesis	0.782	0.125	NaN	ARG2	0
Superoxide Radicals Degradation	0.782	0.125	NaN	SOD2	0
Tryptophan Degradation to 2-amino-3-carboxymuconate Semialdehyde	0.782	0.125	NaN	KMO	0
Purine Ribonucleosides Degradation to Ribose-1-phosphate	0.782	0.125	NaN	PNP	0
Salvage Pathways of Pyrimidine Deoxyribonucleotides	0.782	0.125	NaN	CDA	0
CCR3 Signaling in Eosinophils	0.781	0.0385	NaN	PLA2G4A,PLCB4,GAB1,FGFR2,GNG12	1
ERK5 Signaling	0.78	0.0476	NaN	GAB1,MEF2D,RPS6KA5	1
Aldosterone Signaling in Epithelial Cells	0.776	0.0361	NaN	PLCB4,GAB1,HSPA9,FGFR2,DNAJB6,DNAJB9	1
Huntington's Disease Signaling	0.764	0.0332	NaN	PLCB4,GAB1,HSPA9,FGFR2,RCOR1,SNAP25,GNG12,TAF9B	1
Gap Junction Signaling	0.76	0.0357	NaN	PLCB4,PRKAR2B,GAB1,FGFR2,ADCY7,GUCY1B3	1
TWEAK Signaling	0.756	0.0588	NaN	NFKBIE,TRAF1	0
Inhibition of Angiogenesis by TSP1	0.756	0.0588	NaN	MMP9,GUCY1B3	1
Pyrimidine Ribonucleotides De Novo Biosynthesis	0.756	0.0588	NaN	AK4,ENTPD7	0
ErbB Signaling	0.755	0.0408	NaN	GAB1,FGFR2,HBEGF,AREG	1
Thrombopoietin Signaling	0.752	0.0462	NaN	GAB1,FGFR2,STAT1	2
CTLA4 Signaling in Cytotoxic T Lymphocytes	0.744	0.0404	NaN	AP1M2,GAB1,FGFR2,PPP2R1B	1
FAK Signaling	0.744	0.0404	NaN	ARHGAP26,GAB1,ITGA2,FGFR2	2
Adipogenesis pathway	0.744	0.0373	NaN	FZD8,FGFR2,TNF,WNT5A,FGF1	2
UVB-Induced MAPK Signaling	0.739	0.0455	NaN	GAB1,FGFR2,RPS6KA5	2
Dopamine Degradation	0.737	0.0571	NaN	ALDH1A1,IL4I1	0
Folate Transformations I	0.736	0.111	NaN	MTHFD2L	0
Cholecystokinin/Gastrin-mediated Signaling	0.723	0.0396	NaN	PLCB4,RHOB,MEF2D,TNF	0
Germ Cell-Sertoli Cell Junction Signaling	0.72	0.0347	NaN	GAB1,RHOB,ITGA2,MAP3K1,FGFR2,TNF	2
Virus Entry via Endocytic Pathways	0.713	0.0392	NaN	GAB1,ITGA2,FGFR2,ITGB6	2
Complement System	0.7	0.0541	NaN	C3,CFI	0
Aryl Hydrocarbon Receptor Signaling	0.691	0.0357	NaN	ALDH1A1,GSTA4,CDKN1A,IL6,TNF	2
Sertoli Cell-Sertoli Cell Junction Signaling	0.682	0.0337	NaN	PRKAR2B,ITGA2,MAP3K1,ZAK,TNF,GUCY1B3	2
Caveolar-mediated Endocytosis Signaling	0.676	0.0423	NaN	ITGA2,COPB2,ITGB6	1
Role of JAK1 and JAK3 in γc Cytokine Signaling	0.676	0.0423	NaN	GAB1,FGFR2,STAT1	2
Chemokine Signaling	0.676	0.0423	NaN	PLCB4,CCL2,CCL5	1
IGF-1 Signaling	0.674	0.0377	NaN	PRKAR2B,GAB1,IGFBP3,FGFR2	2
Netrin Signaling	0.666	0.0513	NaN	PRKAR2B,ENAH	0
Basal Cell Carcinoma Signaling	0.664	0.0417	NaN	FZD8,PTCH1,WNT5A	1
GPCR-Mediated Integration of Enteroendocrine Signaling Exemplified by an L Cell	0.664	0.0417	NaN	PLCB4,PRKAR2B,ADCY7	0
Purine Nucleotides De Novo Biosynthesis II	0.658	0.0909	NaN	ADSS	0
Retinol Biosynthesis	0.649	0.05	NaN	DHRS3,RDH10	0
Noradrenaline and Adrenaline Degradation	0.649	0.05	NaN	ALDH1A1,IL4I1	0
LPS/IL-1 Mediated Inhibition of RXR Function	0.648	0.0317	NaN	CHST1,LY96,ALDH1A1,GSTA4,MAP3K1,TNF,IL4I1	0
T Cell Receptor Signaling	0.646	0.0367	NaN	GAB1,VAV3,MAP3K1,FGFR2	1
Amyotrophic Lateral Sclerosis Signaling	0.628	0.036	NaN	GAB1,NEFL,VEGFC,FGFR2	3
Glutaryl-CoA Degradation	0.625	0.0833	NaN	HSD17B4	0
GDNF Family Ligand-Receptor Interactions	0.619	0.0395	NaN	ARTN,GAB1,FGFR2	1
Neurotrophin/TRK Signaling	0.619	0.0395	NaN	GAB1,SPRY2,FGFR2	1
Paxillin Signaling	0.61	0.0354	NaN	GAB1,ITGA2,FGFR2,ITGB6	2
Angiopoietin Signaling	0.608	0.039	NaN	GAB1,NFKBIE,FGFR2	1
Estrogen-Dependent Breast Cancer Signaling	0.608	0.039	NaN	GAB1,FGFR2,HSD17B4	1
Role of p14/p19ARF in Tumor Suppression	0.604	0.0465	NaN	GAB1,FGFR2	1
Serotonin Receptor Signaling	0.604	0.0465	NaN	ADCY7,IL4I1	0
Bile Acid Biosynthesis, Neutral Pathway	0.595	0.0769	NaN	AMACR	0
Erythropoietin Signaling	0.588	0.038	NaN	GAB1,NFKBIE,FGFR2	1
Regulation of IL-2 Expression in Activated and Anergic T Lymphocytes	0.588	0.038	NaN	VAV3,NFKBIE,MAP3K1	0
Macropinocytosis Signaling	0.568	0.037	NaN	GAB1,FGFR2,ITGB6	1
Superpathway of Citrulline Metabolism	0.567	0.0714	NaN	ARG2	0
Phenylalanine Degradation IV (Mammalian, via Side Chain)	0.567	0.0714	NaN	IL4I1	0
Role of Oct4 in Mammalian Embryonic Stem Cell Pluripotency	0.562	0.0435	NaN	JARID2,NR2F6	0
Clathrin-mediated Endocytosis Signaling	0.557	0.0305	NaN	GAB1,VEGFC,FGFR2,ITGB6,FGF1,FGF5	2
iCOS-iCOSL Signaling in T Helper Cells	0.553	0.0333	NaN	CD40,GAB1,NFKBIE,FGFR2	1
phagosome maturation	0.553	0.0333	NaN	NCF2,ATP6V0D2,TAP1,SNAP25	0
IL-3 Signaling	0.549	0.0361	NaN	GAB1,FGFR2,STAT1	2
Prolactin Signaling	0.549	0.0361	NaN	GAB1,FGFR2,STAT1	2
Telomere Extension by Telomerase	0.542	0.0667	NaN	TERF1	0
NAD biosynthesis II (from tryptophan)	0.542	0.0667	NaN	KMO	0
Natural Killer Cell Signaling	0.538	0.0328	NaN	GAB1,VAV3,FGFR2,KLRC1	1
Role of NANOG in Mammalian Embryonic Stem Cell Pluripotency	0.538	0.0328	NaN	FZD8,GAB1,FGFR2,WNT5A	2
Graft-versus-Host Disease Signaling	0.537	0.0417	NaN	IL6,TNF	1
Cell Cycle: G2/M DNA Damage Checkpoint Regulation	0.525	0.0408	NaN	CDKN1A,HIPK2	1
LPS-stimulated MAPK Signaling	0.522	0.0349	NaN	GAB1,NFKBIE,FGFR2	1
Methylglyoxal Degradation III	0.518	0.0625	NaN	AKR1B10	0
α-Adrenergic Signaling	0.513	0.0345	NaN	PRKAR2B,ADCY7,GNG12	0
Assembly of RNA Polymerase II Complex	0.513	0.04	NaN	TAF13,TAF9B	0
FXR/RXR Activation	0.509	0.0317	NaN	C3,SAA1,SAA2,TNF	0
Neuregulin Signaling	0.504	0.0341	NaN	ITGA2,HBEGF,AREG	1
Tight Junction Signaling	0.499	0.0299	NaN	PRKAR2B,CNKSR3,PPP2R1B,SNAP25,TNF	0
CD27 Signaling in Lymphocytes	0.49	0.0385	NaN	NFKBIE,MAP3K1	0
CD28 Signaling in T Helper Cells	0.488	0.031	NaN	GAB1,NFKBIE,MAP3K1,FGFR2	1
14-3-3-mediated Signaling	0.481	0.0308	NaN	PLCB4,GAB1,FGFR2,TNF	1
Cellular Effects of Sildenafil (Viagra)	0.481	0.0308	NaN	PLCB4,PRKAR2B,ADCY7,GUCY1B3	0
Acute Myeloid Leukemia Signaling	0.48	0.033	NaN	KITLG,GAB1,FGFR2	2
FcγRIIB Signaling in B Lymphocytes	0.479	0.0377	NaN	GAB1,FGFR2	1
Phototransduction Pathway	0.479	0.0377	NaN	PRKAR2B,GUCY1B3	0
D-myo-inositol (1,4,5)-trisphosphate Degradation	0.476	0.0556	NaN	IMPA2	0
Mitochondrial Dysfunction	0.476	0.0292	NaN	PRDX3,UCP2,SOD2,GPD2,XDH	0
Fcγ Receptor-mediated Phagocytosis in Macrophages and Monocytes	0.464	0.0323	NaN	HMOX1,VAV3,CSF2	0
Salvage Pathways of Pyrimidine Ribonucleotides	0.464	0.0323	NaN	PRKAA1,AK4,CDA	1
PPAR Signaling	0.464	0.0323	NaN	NFKBIE,TNF,MAP4K4	0
Role of CHK Proteins in Cell Cycle Checkpoint Control	0.458	0.0364	NaN	CDKN1A,PPP2R1B	1
GADD45 Signaling	0.458	0.0526	NaN	CDKN1A	1
Histamine Degradation	0.458	0.0526	NaN	ALDH1A1	0
Cardiac β-adrenergic Signaling	0.449	0.0296	NaN	PRKAR2B,PPP2R1B,ADCY7,GNG12	0
Actin Nucleation by ARP-WASP Complex	0.448	0.0357	NaN	RHOB,ITGA2	1
Calcium Signaling	0.437	0.0281	NaN	RCAN1,PRKAR2B,MEF2D,MCU,RAP1A	1
Oxidative Ethanol Degradation III	0.423	0.0476	NaN	ALDH1A1	0
Systemic Lupus Erythematosus Signaling	0.412	0.0267	NaN	CD40,GAB1,FGFR2,IL6,LSM5,TNF	2
Dermatan Sulfate Biosynthesis	0.411	0.0333	NaN	CHST1,CSGALNACT2	0
Fatty Acid α-oxidation	0.407	0.0455	NaN	ALDH1A1	0
VEGF Signaling	0.393	0.0291	NaN	GAB1,VEGFC,FGFR2	2
TCA Cycle II (Eukaryotic)	0.393	0.0435	NaN	SUCLA2	0
Chronic Myeloid Leukemia Signaling	0.387	0.0288	NaN	GAB1,CDKN1A,FGFR2	2
PCP pathway	0.385	0.0317	NaN	FZD8,WNT5A	1
IL-22 Signaling	0.379	0.0417	NaN	STAT1	1
Role of JAK1, JAK2 and TYK2 in Interferon Signaling	0.379	0.0417	NaN	STAT1	1
Estrogen-mediated S-phase Entry	0.379	0.0417	NaN	CDKN1A	1
Endometrial Cancer Signaling	0.377	0.0312	NaN	GAB1,FGFR2	1
IL-2 Signaling	0.377	0.0312	NaN	GAB1,FGFR2	1
Hypoxia Signaling in the Cardiovascular System	0.369	0.0308	NaN	UBE2N,NFKBIE	0
Superpathway of D-myo-inositol (1,4,5)-trisphosphate Metabolism	0.365	0.04	NaN	IMPA2	0
Gluconeogenesis I	0.365	0.04	NaN	ME1	0
Ethanol Degradation IV	0.365	0.04	NaN	ALDH1A1	0
Mitotic Roles of Polo-Like Kinase	0.362	0.0303	NaN	PLK2,PPP2R1B	0
GABA Receptor Signaling	0.354	0.0299	NaN	GPHN,ADCY7	0
NAD Salvage Pathway II	0.353	0.0385	NaN	NT5E	0
Type I Diabetes Mellitus Signaling	0.351	0.0273	NaN	NFKBIE,STAT1,TNF	1
Glioma Signaling	0.351	0.0273	NaN	GAB1,CDKN1A,FGFR2	2
D-myo-inositol (1,4,5)-Trisphosphate Biosynthesis	0.341	0.037	NaN	PLCB4	0
CCR5 Signaling in Macrophages	0.34	0.029	NaN	CCL5,GNG12	0
ErbB2-ErbB3 Signaling	0.34	0.029	NaN	GAB1,FGFR2	1
Myc Mediated Apoptosis Signaling	0.333	0.0286	NaN	GAB1,FGFR2	1
Melatonin Signaling	0.326	0.0282	NaN	PLCB4,PRKAR2B	0
ErbB4 Signaling	0.319	0.0278	NaN	GAB1,FGFR2	1
Intrinsic Prothrombin Activation Pathway	0.318	0.0345	NaN	THBD	0
Glutathione-mediated Detoxification	0.318	0.0345	NaN	GSTA4	0
STAT3 Pathway	0.313	0.0274	NaN	CDKN1A,FGFR2	2
Serotonin Degradation	0.306	0.027	NaN	ALDH1A1,IL4I1	0
Synaptic Long Term Potentiation	0.298	0.025	NaN	PLCB4,PRKAR2B,RAP1A	1
Protein Ubiquitination Pathway	0.297	0.0235	NaN	USP36,UBE2N,HSPA9,DNAJB6,DNAJB9,TAP1	0
Role of Wnt/GSK-3β Signaling in the Pathogenesis of Influenza	0.294	0.0263	NaN	FZD8,WNT5A	1
Gustation Pathway	0.289	0.0246	NaN	P2RY2,PRKAR2B,ADCY7	0
Fatty Acid β-oxidation I	0.289	0.0312	NaN	HSD17B4	0
Non-Small Cell Lung Cancer Signaling	0.288	0.026	NaN	GAB1,FGFR2	1
Role of BRCA1 in DNA Damage Response	0.282	0.0256	NaN	CDKN1A,STAT1	2
Cyclins and Cell Cycle Regulation	0.282	0.0256	NaN	CDKN1A,PPP2R1B	1
Circadian Rhythm Signaling	0.28	0.0303	NaN	PER3	0
B Cell Development	0.28	0.0303	NaN	CD40	0
Role of JAK2 in Hormone-like Cytokine Signaling	0.271	0.0294	NaN	STAT1	1
Cell Cycle Regulation by BTG Family Proteins	0.263	0.0286	NaN	PPP2R1B	0
Estrogen Receptor Signaling	0.262	0.0234	NaN	PHB2,TAF13,TAF9B	0
autophagy	0.255	0.0278	NaN	WIPI1	0
Allograft Rejection Signaling	0.25	0.0238	NaN	CD40,TNF	0
Ethanol Degradation II	0.247	0.027	NaN	ALDH1A1	0
Antigen Presentation Pathway	0.247	0.027	NaN	TAP1	0
HIPPO signaling	0.24	0.0233	NaN	FAT4,PPP2R1B	0
IL-4 Signaling	0.236	0.023	NaN	GAB1,FGFR2	1
TGF-β Signaling	0.236	0.023	NaN	VDR,INHBA	0
Estrogen Biosynthesis	0.232	0.0256	NaN	HSD17B4	0
Thyroid Cancer Signaling	0.226	0.025	NaN	CXCL1	1
Triacylglycerol Degradation	0.201	0.0227	NaN	ABHD2	0

## Sheet: Detail
Ingenuity Canonical Pathways	-log(p-value)	Ratio	z-score	Molecules	Entrez Gene Name	Location	Type(s)	Corrected_p-value	P value	Regulation	FCAbsolute	Fold_Change	Log_FC
Hepatic Fibrosis / Hepatic Stellate Cell Activation	7.52	0.104	NaN	CXCL8	C-X-C motif chemokine ligand 8	Extracellular Space	cytokine	4.70395e-05	7.41202e-07	up	6.01014	6.01014	2.5874
Hepatic Fibrosis / Hepatic Stellate Cell Activation	7.52	0.104	NaN	ICAM1	intercellular adhesion molecule 1	Plasma Membrane	transmembrane receptor	4.25833e-05	4.82261e-07	up	4.88337	4.88337	2.28788
Hepatic Fibrosis / Hepatic Stellate Cell Activation	7.52	0.104	NaN	FGFR2	fibroblast growth factor receptor 2	Plasma Membrane	kinase	0.000292993	7.4204e-05	down	4.45302	-4.45302	-2.15478
Hepatic Fibrosis / Hepatic Stellate Cell Activation	7.52	0.104	NaN	VEGFC	vascular endothelial growth factor C	Extracellular Space	growth factor	4.25833e-05	4.70028e-07	up	2.6596	2.6596	1.41121
Hepatic Fibrosis / Hepatic Stellate Cell Activation	7.52	0.104	NaN	IL6	interleukin 6	Extracellular Space	cytokine	3.65159e-05	2.68298e-07	up	2.78882	2.78882	1.47965
Hepatic Fibrosis / Hepatic Stellate Cell Activation	7.52	0.104	NaN	CCL5	C-C motif chemokine ligand 5	Extracellular Space	cytokine	0.000244253	5.08419e-05	up	3.69923	3.69923	1.88723
Hepatic Fibrosis / Hepatic Stellate Cell Activation	7.52	0.104	NaN	COL17A1	collagen type XVII alpha 1	Extracellular Space	other	0.00172369	0.00130231	up	2.55161	2.55161	1.35141
Hepatic Fibrosis / Hepatic Stellate Cell Activation	7.52	0.104	NaN	FGF1	fibroblast growth factor 1	Extracellular Space	growth factor	0.000689416	0.000339749	up	2.7327	2.7327	1.45033
Hepatic Fibrosis / Hepatic Stellate Cell Activation	7.52	0.104	NaN	CXCL3	C-X-C motif chemokine ligand 3	Extracellular Space	cytokine	0.000453284	0.000162494	up	3.10131	3.10131	1.63288
Hepatic Fibrosis / Hepatic Stellate Cell Activation	7.52	0.104	NaN	LY96	lymphocyte antigen 96	Plasma Membrane	transmembrane receptor	0.000399174	0.000129442	up	2.09875	2.09875	1.06953
Hepatic Fibrosis / Hepatic Stellate Cell Activation	7.52	0.104	NaN	CCL2	C-C motif chemokine ligand 2	Extracellular Space	cytokine	5.71384e-05	1.64325e-06	up	4.18932	4.18932	2.06672
Hepatic Fibrosis / Hepatic Stellate Cell Activation	7.52	0.104	NaN	CD40	CD40 molecule	Plasma Membrane	transmembrane receptor	9.69248e-05	8.01981e-06	up	2.53917	2.53917	1.34436
Hepatic Fibrosis / Hepatic Stellate Cell Activation	7.52	0.104	NaN	COL13A1	collagen type XIII alpha 1	Plasma Membrane	other	0.000438312	0.000152549	up	2.00617	2.00617	1.00444
Hepatic Fibrosis / Hepatic Stellate Cell Activation	7.52	0.104	NaN	IGFBP3	insulin like growth factor binding protein 3	Extracellular Space	other	2.3646e-05	3.67681e-08	down	2.30432	-2.30432	-1.20434
Hepatic Fibrosis / Hepatic Stellate Cell Activation	7.52	0.104	NaN	ECE1	endothelin converting enzyme 1	Plasma Membrane	peptidase	0.000147862	1.93143e-05	up	2.01302	2.01302	1.00936
Hepatic Fibrosis / Hepatic Stellate Cell Activation	7.52	0.104	NaN	STAT1	signal transducer and activator of transcription 1	Nucleus	transcription regulator	0.000127302	1.44319e-05	down	2.48387	-2.48387	-1.31259
Hepatic Fibrosis / Hepatic Stellate Cell Activation	7.52	0.104	NaN	TNF	tumor necrosis factor	Extracellular Space	cytokine	0.000291147	7.31026e-05	up	2.74571	2.74571	1.45718
Hepatic Fibrosis / Hepatic Stellate Cell Activation	7.52	0.104	NaN	MMP9	matrix metallopeptidase 9	Extracellular Space	peptidase	0.000105861	9.4402e-06	up	5.58648	5.58648	2.48194
Hepatic Fibrosis / Hepatic Stellate Cell Activation	7.52	0.104	NaN	MMP1	matrix metallopeptidase 1	Extracellular Space	peptidase	2.99009e-05	6.82824e-08	up	3.68258	3.68258	1.88072
Role of Pattern Recognition Receptors in Recognition of Bacteria and Viruses	7.14	0.117	1.508	PTX3	pentraxin 3	Extracellular Space	other	0.000292993	7.42705e-05	up	3.61367	3.61367	1.85347
Role of Pattern Recognition Receptors in Recognition of Bacteria and Viruses	7.14	0.117	1.508	CXCL8	C-X-C motif chemokine ligand 8	Extracellular Space	cytokine	4.70395e-05	7.41202e-07	up	6.01014	6.01014	2.5874
Role of Pattern Recognition Receptors in Recognition of Bacteria and Viruses	7.14	0.117	1.508	OAS1	2'-5'-oligoadenylate synthetase 1	Cytoplasm	enzyme	0.000831887	0.000462867	up	2.54895	2.54895	1.3499
Role of Pattern Recognition Receptors in Recognition of Bacteria and Viruses	7.14	0.117	1.508	NLRP3	NLR family, pyrin domain containing 3	Cytoplasm	other	0.000235207	4.68615e-05	up	3.66524	3.66524	1.87391
Role of Pattern Recognition Receptors in Recognition of Bacteria and Viruses	7.14	0.117	1.508	C3	complement component 3	Extracellular Space	peptidase	0.000166276	2.38974e-05	up	3.15758	3.15758	1.65882
Role of Pattern Recognition Receptors in Recognition of Bacteria and Viruses	7.14	0.117	1.508	FGFR2	fibroblast growth factor receptor 2	Plasma Membrane	kinase	0.000292993	7.4204e-05	down	4.45302	-4.45302	-2.15478
Role of Pattern Recognition Receptors in Recognition of Bacteria and Viruses	7.14	0.117	1.508	IL6	interleukin 6	Extracellular Space	cytokine	3.65159e-05	2.68298e-07	up	2.78882	2.78882	1.47965
Role of Pattern Recognition Receptors in Recognition of Bacteria and Viruses	7.14	0.117	1.508	CCL5	C-C motif chemokine ligand 5	Extracellular Space	cytokine	0.000244253	5.08419e-05	up	3.69923	3.69923	1.88723
Role of Pattern Recognition Receptors in Recognition of Bacteria and Viruses	7.14	0.117	1.508	OAS3	2'-5'-oligoadenylate synthetase 3	Cytoplasm	enzyme	0.000375918	0.00011733	up	2.42183	2.42183	1.2761
Role of Pattern Recognition Receptors in Recognition of Bacteria and Viruses	7.14	0.117	1.508	TLR2	toll like receptor 2	Plasma Membrane	transmembrane receptor	8.09449e-05	5.23963e-06	up	4.16405	4.16405	2.05799
Role of Pattern Recognition Receptors in Recognition of Bacteria and Viruses	7.14	0.117	1.508	IFIH1	interferon induced with helicase C domain 1	Nucleus	enzyme	6.05334e-05	2.0177e-06	up	2.86486	2.86486	1.51846
Role of Pattern Recognition Receptors in Recognition of Bacteria and Viruses	7.14	0.117	1.508	GAB1	GRB2 associated binding protein 1	Cytoplasm	kinase	0.000120758	1.28231e-05	down	2.38756	-2.38756	-1.25554
Role of Pattern Recognition Receptors in Recognition of Bacteria and Viruses	7.14	0.117	1.508	DDX58	DEXD/H-box helicase 58	Cytoplasm	enzyme	7.88016e-05	4.63882e-06	up	2.39664	2.39664	1.26101
Role of Pattern Recognition Receptors in Recognition of Bacteria and Viruses	7.14	0.117	1.508	MAVS	mitochondrial antiviral signaling protein	Cytoplasm	other	0.001397	0.000996787	down	2.47268	-2.47268	-1.30607
Role of Pattern Recognition Receptors in Recognition of Bacteria and Viruses	7.14	0.117	1.508	CSF2	colony stimulating factor 2	Extracellular Space	cytokine	0.000181511	2.91396e-05	up	3.2134	3.2134	1.6841
Role of Pattern Recognition Receptors in Recognition of Bacteria and Viruses	7.14	0.117	1.508	TNF	tumor necrosis factor	Extracellular Space	cytokine	0.000291147	7.31026e-05	up	2.74571	2.74571	1.45718
Role of IL-17A in Arthritis	6.6	0.164	NaN	CXCL8	C-X-C motif chemokine ligand 8	Extracellular Space	cytokine	4.70395e-05	7.41202e-07	up	6.01014	6.01014	2.5874
Role of IL-17A in Arthritis	6.6	0.164	NaN	CXCL3	C-X-C motif chemokine ligand 3	Extracellular Space	cytokine	0.000453284	0.000162494	up	3.10131	3.10131	1.63288
Role of IL-17A in Arthritis	6.6	0.164	NaN	CCL2	C-C motif chemokine ligand 2	Extracellular Space	cytokine	5.71384e-05	1.64325e-06	up	4.18932	4.18932	2.06672
Role of IL-17A in Arthritis	6.6	0.164	NaN	GAB1	GRB2 associated binding protein 1	Cytoplasm	kinase	0.000120758	1.28231e-05	down	2.38756	-2.38756	-1.25554
Role of IL-17A in Arthritis	6.6	0.164	NaN	NFKBIE	NFKB inhibitor epsilon	Nucleus	transcription regulator	7.29755e-05	3.81911e-06	up	2.23963	2.23963	1.16326
Role of IL-17A in Arthritis	6.6	0.164	NaN	CCL20	C-C motif chemokine ligand 20	Extracellular Space	cytokine	0.00012705	1.42377e-05	up	3.12207	3.12207	1.6425
Role of IL-17A in Arthritis	6.6	0.164	NaN	FGFR2	fibroblast growth factor receptor 2	Plasma Membrane	kinase	0.000292993	7.4204e-05	down	4.45302	-4.45302	-2.15478
Role of IL-17A in Arthritis	6.6	0.164	NaN	CXCL1	C-X-C motif chemokine ligand 1	Extracellular Space	cytokine	7.2018e-05	3.46222e-06	up	2.66667	2.66667	1.41504
Role of IL-17A in Arthritis	6.6	0.164	NaN	CXCL5	C-X-C motif chemokine ligand 5	Extracellular Space	cytokine	0.000517835	0.000205801	up	2.85352	2.85352	1.51274
Role of IL-17A in Arthritis	6.6	0.164	NaN	CCL5	C-C motif chemokine ligand 5	Extracellular Space	cytokine	0.000244253	5.08419e-05	up	3.69923	3.69923	1.88723
Role of IL-17A in Arthritis	6.6	0.164	NaN	MMP1	matrix metallopeptidase 1	Extracellular Space	peptidase	2.99009e-05	6.82824e-08	up	3.68258	3.68258	1.88072
Airway Pathology in Chronic Obstructive Pulmonary Disease	6.54	0.625	NaN	CXCL8	C-X-C motif chemokine ligand 8	Extracellular Space	cytokine	4.70395e-05	7.41202e-07	up	6.01014	6.01014	2.5874
Airway Pathology in Chronic Obstructive Pulmonary Disease	6.54	0.625	NaN	CXCL3	C-X-C motif chemokine ligand 3	Extracellular Space	cytokine	0.000453284	0.000162494	up	3.10131	3.10131	1.63288
Airway Pathology in Chronic Obstructive Pulmonary Disease	6.54	0.625	NaN	TNF	tumor necrosis factor	Extracellular Space	cytokine	0.000291147	7.31026e-05	up	2.74571	2.74571	1.45718
Airway Pathology in Chronic Obstructive Pulmonary Disease	6.54	0.625	NaN	MMP9	matrix metallopeptidase 9	Extracellular Space	peptidase	0.000105861	9.4402e-06	up	5.58648	5.58648	2.48194
Airway Pathology in Chronic Obstructive Pulmonary Disease	6.54	0.625	NaN	MMP1	matrix metallopeptidase 1	Extracellular Space	peptidase	2.99009e-05	6.82824e-08	up	3.68258	3.68258	1.88072
TREM1 Signaling	6.09	0.147	3.317	TLR2	toll like receptor 2	Plasma Membrane	transmembrane receptor	8.09449e-05	5.23963e-06	up	4.16405	4.16405	2.05799
TREM1 Signaling	6.09	0.147	3.317	CXCL8	C-X-C motif chemokine ligand 8	Extracellular Space	cytokine	4.70395e-05	7.41202e-07	up	6.01014	6.01014	2.5874
TREM1 Signaling	6.09	0.147	3.317	CXCL3	C-X-C motif chemokine ligand 3	Extracellular Space	cytokine	0.000453284	0.000162494	up	3.10131	3.10131	1.63288
TREM1 Signaling	6.09	0.147	3.317	ICAM1	intercellular adhesion molecule 1	Plasma Membrane	transmembrane receptor	4.25833e-05	4.82261e-07	up	4.88337	4.88337	2.28788
TREM1 Signaling	6.09	0.147	3.317	NLRP3	NLR family, pyrin domain containing 3	Cytoplasm	other	0.000235207	4.68615e-05	up	3.66524	3.66524	1.87391
TREM1 Signaling	6.09	0.147	3.317	CCL2	C-C motif chemokine ligand 2	Extracellular Space	cytokine	5.71384e-05	1.64325e-06	up	4.18932	4.18932	2.06672
TREM1 Signaling	6.09	0.147	3.317	CD40	CD40 molecule	Plasma Membrane	transmembrane receptor	9.69248e-05	8.01981e-06	up	2.53917	2.53917	1.34436
TREM1 Signaling	6.09	0.147	3.317	CD83	CD83 molecule	Plasma Membrane	transmembrane receptor	4.38315e-05	5.49112e-07	up	3.66965	3.66965	1.87564
TREM1 Signaling	6.09	0.147	3.317	IL6	interleukin 6	Extracellular Space	cytokine	3.65159e-05	2.68298e-07	up	2.78882	2.78882	1.47965
TREM1 Signaling	6.09	0.147	3.317	CSF2	colony stimulating factor 2	Extracellular Space	cytokine	0.000181511	2.91396e-05	up	3.2134	3.2134	1.6841
TREM1 Signaling	6.09	0.147	3.317	TNF	tumor necrosis factor	Extracellular Space	cytokine	0.000291147	7.31026e-05	up	2.74571	2.74571	1.45718
Agranulocyte Adhesion and Diapedesis	5.9	0.0899	NaN	CXCL8	C-X-C motif chemokine ligand 8	Extracellular Space	cytokine	4.70395e-05	7.41202e-07	up	6.01014	6.01014	2.5874
Agranulocyte Adhesion and Diapedesis	5.9	0.0899	NaN	CXCL11	C-X-C motif chemokine ligand 11	Other	cytokine	0.000621227	0.000282085	up	2.52305	2.52305	1.33517
Agranulocyte Adhesion and Diapedesis	5.9	0.0899	NaN	MMP7	matrix metallopeptidase 7	Extracellular Space	peptidase	0.000324617	9.07357e-05	down	4.18581	-4.18581	-2.06551
Agranulocyte Adhesion and Diapedesis	5.9	0.0899	NaN	ICAM1	intercellular adhesion molecule 1	Plasma Membrane	transmembrane receptor	4.25833e-05	4.82261e-07	up	4.88337	4.88337	2.28788
Agranulocyte Adhesion and Diapedesis	5.9	0.0899	NaN	MMP14	matrix metallopeptidase 14	Extracellular Space	peptidase	5.71384e-05	1.58188e-06	up	2.21198	2.21198	1.14534
Agranulocyte Adhesion and Diapedesis	5.9	0.0899	NaN	ITGA2	integrin subunit alpha 2	Plasma Membrane	transmembrane receptor	0.000106124	9.61516e-06	up	4.46447	4.46447	2.15849
Agranulocyte Adhesion and Diapedesis	5.9	0.0899	NaN	CCL20	C-C motif chemokine ligand 20	Extracellular Space	cytokine	0.00012705	1.42377e-05	up	3.12207	3.12207	1.6425
Agranulocyte Adhesion and Diapedesis	5.9	0.0899	NaN	CXCL5	C-X-C motif chemokine ligand 5	Extracellular Space	cytokine	0.000517835	0.000205801	up	2.85352	2.85352	1.51274
Agranulocyte Adhesion and Diapedesis	5.9	0.0899	NaN	CCL5	C-C motif chemokine ligand 5	Extracellular Space	cytokine	0.000244253	5.08419e-05	up	3.69923	3.69923	1.88723
Agranulocyte Adhesion and Diapedesis	5.9	0.0899	NaN	CXCL3	C-X-C motif chemokine ligand 3	Extracellular Space	cytokine	0.000453284	0.000162494	up	3.10131	3.10131	1.63288
Agranulocyte Adhesion and Diapedesis	5.9	0.0899	NaN	CCL2	C-C motif chemokine ligand 2	Extracellular Space	cytokine	5.71384e-05	1.64325e-06	up	4.18932	4.18932	2.06672
Agranulocyte Adhesion and Diapedesis	5.9	0.0899	NaN	PODXL	podocalyxin like	Plasma Membrane	kinase	6.8669e-05	2.89323e-06	up	2.31816	2.31816	1.21298
Agranulocyte Adhesion and Diapedesis	5.9	0.0899	NaN	CXCL1	C-X-C motif chemokine ligand 1	Extracellular Space	cytokine	7.2018e-05	3.46222e-06	up	2.66667	2.66667	1.41504
Agranulocyte Adhesion and Diapedesis	5.9	0.0899	NaN	CXCL2	C-X-C motif chemokine ligand 2	Extracellular Space	cytokine	7.29755e-05	3.81133e-06	up	2.98142	2.98142	1.576
Agranulocyte Adhesion and Diapedesis	5.9	0.0899	NaN	TNF	tumor necrosis factor	Extracellular Space	cytokine	0.000291147	7.31026e-05	up	2.74571	2.74571	1.45718
Agranulocyte Adhesion and Diapedesis	5.9	0.0899	NaN	MMP9	matrix metallopeptidase 9	Extracellular Space	peptidase	0.000105861	9.4402e-06	up	5.58648	5.58648	2.48194
Agranulocyte Adhesion and Diapedesis	5.9	0.0899	NaN	MMP1	matrix metallopeptidase 1	Extracellular Space	peptidase	2.99009e-05	6.82824e-08	up	3.68258	3.68258	1.88072
Differential Regulation of Cytokine Production in Macrophages and T Helper Cells by IL-17A and IL-17F	5.75	0.333	NaN	CCL2	C-C motif chemokine ligand 2	Extracellular Space	cytokine	5.71384e-05	1.64325e-06	up	4.18932	4.18932	2.06672
Differential Regulation of Cytokine Production in Macrophages and T Helper Cells by IL-17A and IL-17F	5.75	0.333	NaN	CXCL1	C-X-C motif chemokine ligand 1	Extracellular Space	cytokine	7.2018e-05	3.46222e-06	up	2.66667	2.66667	1.41504
Differential Regulation of Cytokine Production in Macrophages and T Helper Cells by IL-17A and IL-17F	5.75	0.333	NaN	CCL5	C-C motif chemokine ligand 5	Extracellular Space	cytokine	0.000244253	5.08419e-05	up	3.69923	3.69923	1.88723
Differential Regulation of Cytokine Production in Macrophages and T Helper Cells by IL-17A and IL-17F	5.75	0.333	NaN	IL6	interleukin 6	Extracellular Space	cytokine	3.65159e-05	2.68298e-07	up	2.78882	2.78882	1.47965
Differential Regulation of Cytokine Production in Macrophages and T Helper Cells by IL-17A and IL-17F	5.75	0.333	NaN	CSF2	colony stimulating factor 2	Extracellular Space	cytokine	0.000181511	2.91396e-05	up	3.2134	3.2134	1.6841
Differential Regulation of Cytokine Production in Macrophages and T Helper Cells by IL-17A and IL-17F	5.75	0.333	NaN	TNF	tumor necrosis factor	Extracellular Space	cytokine	0.000291147	7.31026e-05	up	2.74571	2.74571	1.45718
Glucocorticoid Receptor Signaling	5.67	0.0732	NaN	CXCL8	C-X-C motif chemokine ligand 8	Extracellular Space	cytokine	4.70395e-05	7.41202e-07	up	6.01014	6.01014	2.5874
Glucocorticoid Receptor Signaling	5.67	0.0732	NaN	CDKN1C	cyclin-dependent kinase inhibitor 1C	Nucleus	other	9.05642e-05	6.78352e-06	down	2.73683	-2.73683	-1.45251
Glucocorticoid Receptor Signaling	5.67	0.0732	NaN	ICAM1	intercellular adhesion molecule 1	Plasma Membrane	transmembrane receptor	4.25833e-05	4.82261e-07	up	4.88337	4.88337	2.28788
Glucocorticoid Receptor Signaling	5.67	0.0732	NaN	NFKBIE	NFKB inhibitor epsilon	Nucleus	transcription regulator	7.29755e-05	3.81911e-06	up	2.23963	2.23963	1.16326
Glucocorticoid Receptor Signaling	5.67	0.0732	NaN	HSPA9	heat shock protein family A (Hsp70) member 9	Cytoplasm	other	5.12481e-05	1.15744e-06	down	2.64295	-2.64295	-1.40215
Glucocorticoid Receptor Signaling	5.67	0.0732	NaN	MAP3K1	mitogen-activated protein kinase kinase kinase 1	Cytoplasm	kinase	0.000104164	9.08987e-06	down	2.99182	-2.99182	-1.58102
Glucocorticoid Receptor Signaling	5.67	0.0732	NaN	FGFR2	fibroblast growth factor receptor 2	Plasma Membrane	kinase	0.000292993	7.4204e-05	down	4.45302	-4.45302	-2.15478
Glucocorticoid Receptor Signaling	5.67	0.0732	NaN	IL6	interleukin 6	Extracellular Space	cytokine	3.65159e-05	2.68298e-07	up	2.78882	2.78882	1.47965
Glucocorticoid Receptor Signaling	5.67	0.0732	NaN	CCL5	C-C motif chemokine ligand 5	Extracellular Space	cytokine	0.000244253	5.08419e-05	up	3.69923	3.69923	1.88723
Glucocorticoid Receptor Signaling	5.67	0.0732	NaN	TAF13	TATA-box binding protein associated factor 13	Nucleus	transcription regulator	0.00113922	0.000750164	up	2.87707	2.87707	1.5246
Glucocorticoid Receptor Signaling	5.67	0.0732	NaN	TAF9B	TATA-box binding protein associated factor 9b	Nucleus	transcription regulator	6.88576e-05	2.9817e-06	down	2.4706	-2.4706	-1.30486
Glucocorticoid Receptor Signaling	5.67	0.0732	NaN	CXCL3	C-X-C motif chemokine ligand 3	Extracellular Space	cytokine	0.000453284	0.000162494	up	3.10131	3.10131	1.63288
Glucocorticoid Receptor Signaling	5.67	0.0732	NaN	CCL2	C-C motif chemokine ligand 2	Extracellular Space	cytokine	5.71384e-05	1.64325e-06	up	4.18932	4.18932	2.06672
Glucocorticoid Receptor Signaling	5.67	0.0732	NaN	GAB1	GRB2 associated binding protein 1	Cytoplasm	kinase	0.000120758	1.28231e-05	down	2.38756	-2.38756	-1.25554
Glucocorticoid Receptor Signaling	5.67	0.0732	NaN	CDKN1A	cyclin-dependent kinase inhibitor 1A	Nucleus	kinase	0.000177018	2.76906e-05	up	2.34183	2.34183	1.22764
Glucocorticoid Receptor Signaling	5.67	0.0732	NaN	PRKAA1	protein kinase AMP-activated catalytic subunit alpha 1	Cytoplasm	kinase	0.00048552	0.000183941	down	2.44451	-2.44451	-1.28954
Glucocorticoid Receptor Signaling	5.67	0.0732	NaN	PLAU	plasminogen activator, urokinase	Extracellular Space	peptidase	7.29755e-05	3.74487e-06	up	4.08751	4.08751	2.03122
Glucocorticoid Receptor Signaling	5.67	0.0732	NaN	CSF2	colony stimulating factor 2	Extracellular Space	cytokine	0.000181511	2.91396e-05	up	3.2134	3.2134	1.6841
Glucocorticoid Receptor Signaling	5.67	0.0732	NaN	STAT1	signal transducer and activator of transcription 1	Nucleus	transcription regulator	0.000127302	1.44319e-05	down	2.48387	-2.48387	-1.31259
Glucocorticoid Receptor Signaling	5.67	0.0732	NaN	TNF	tumor necrosis factor	Extracellular Space	cytokine	0.000291147	7.31026e-05	up	2.74571	2.74571	1.45718
Glucocorticoid Receptor Signaling	5.67	0.0732	NaN	MMP1	matrix metallopeptidase 1	Extracellular Space	peptidase	2.99009e-05	6.82824e-08	up	3.68258	3.68258	1.88072
Granulocyte Adhesion and Diapedesis	5.62	0.0904	NaN	CXCL8	C-X-C motif chemokine ligand 8	Extracellular Space	cytokine	4.70395e-05	7.41202e-07	up	6.01014	6.01014	2.5874
Granulocyte Adhesion and Diapedesis	5.62	0.0904	NaN	CXCL11	C-X-C motif chemokine ligand 11	Other	cytokine	0.000621227	0.000282085	up	2.52305	2.52305	1.33517
Granulocyte Adhesion and Diapedesis	5.62	0.0904	NaN	MMP7	matrix metallopeptidase 7	Extracellular Space	peptidase	0.000324617	9.07357e-05	down	4.18581	-4.18581	-2.06551
Granulocyte Adhesion and Diapedesis	5.62	0.0904	NaN	ICAM1	intercellular adhesion molecule 1	Plasma Membrane	transmembrane receptor	4.25833e-05	4.82261e-07	up	4.88337	4.88337	2.28788
Granulocyte Adhesion and Diapedesis	5.62	0.0904	NaN	MMP14	matrix metallopeptidase 14	Extracellular Space	peptidase	5.71384e-05	1.58188e-06	up	2.21198	2.21198	1.14534
Granulocyte Adhesion and Diapedesis	5.62	0.0904	NaN	ITGA2	integrin subunit alpha 2	Plasma Membrane	transmembrane receptor	0.000106124	9.61516e-06	up	4.46447	4.46447	2.15849
Granulocyte Adhesion and Diapedesis	5.62	0.0904	NaN	CCL20	C-C motif chemokine ligand 20	Extracellular Space	cytokine	0.00012705	1.42377e-05	up	3.12207	3.12207	1.6425
Granulocyte Adhesion and Diapedesis	5.62	0.0904	NaN	CXCL5	C-X-C motif chemokine ligand 5	Extracellular Space	cytokine	0.000517835	0.000205801	up	2.85352	2.85352	1.51274
Granulocyte Adhesion and Diapedesis	5.62	0.0904	NaN	CCL5	C-C motif chemokine ligand 5	Extracellular Space	cytokine	0.000244253	5.08419e-05	up	3.69923	3.69923	1.88723
Granulocyte Adhesion and Diapedesis	5.62	0.0904	NaN	CXCL3	C-X-C motif chemokine ligand 3	Extracellular Space	cytokine	0.000453284	0.000162494	up	3.10131	3.10131	1.63288
Granulocyte Adhesion and Diapedesis	5.62	0.0904	NaN	CCL2	C-C motif chemokine ligand 2	Extracellular Space	cytokine	5.71384e-05	1.64325e-06	up	4.18932	4.18932	2.06672
Granulocyte Adhesion and Diapedesis	5.62	0.0904	NaN	CXCL1	C-X-C motif chemokine ligand 1	Extracellular Space	cytokine	7.2018e-05	3.46222e-06	up	2.66667	2.66667	1.41504
Granulocyte Adhesion and Diapedesis	5.62	0.0904	NaN	CXCL2	C-X-C motif chemokine ligand 2	Extracellular Space	cytokine	7.29755e-05	3.81133e-06	up	2.98142	2.98142	1.576
Granulocyte Adhesion and Diapedesis	5.62	0.0904	NaN	TNF	tumor necrosis factor	Extracellular Space	cytokine	0.000291147	7.31026e-05	up	2.74571	2.74571	1.45718
Granulocyte Adhesion and Diapedesis	5.62	0.0904	NaN	MMP9	matrix metallopeptidase 9	Extracellular Space	peptidase	0.000105861	9.4402e-06	up	5.58648	5.58648	2.48194
Granulocyte Adhesion and Diapedesis	5.62	0.0904	NaN	MMP1	matrix metallopeptidase 1	Extracellular Space	peptidase	2.99009e-05	6.82824e-08	up	3.68258	3.68258	1.88072
Role of Tissue Factor in Cancer	5.46	0.107	NaN	CXCL8	C-X-C motif chemokine ligand 8	Extracellular Space	cytokine	4.70395e-05	7.41202e-07	up	6.01014	6.01014	2.5874
Role of Tissue Factor in Cancer	5.46	0.107	NaN	GAB1	GRB2 associated binding protein 1	Cytoplasm	kinase	0.000120758	1.28231e-05	down	2.38756	-2.38756	-1.25554
Role of Tissue Factor in Cancer	5.46	0.107	NaN	EGR1	early growth response 1	Nucleus	transcription regulator	0.000910266	0.000531525	down	2.02311	-2.02311	-1.01658
Role of Tissue Factor in Cancer	5.46	0.107	NaN	HBEGF	heparin binding EGF like growth factor	Extracellular Space	growth factor	0.000324605	9.06211e-05	up	2.92802	2.92802	1.54993
Role of Tissue Factor in Cancer	5.46	0.107	NaN	FGFR2	fibroblast growth factor receptor 2	Plasma Membrane	kinase	0.000292993	7.4204e-05	down	4.45302	-4.45302	-2.15478
Role of Tissue Factor in Cancer	5.46	0.107	NaN	VEGFC	vascular endothelial growth factor C	Extracellular Space	growth factor	4.25833e-05	4.70028e-07	up	2.6596	2.6596	1.41121
Role of Tissue Factor in Cancer	5.46	0.107	NaN	PLAUR	plasminogen activator, urokinase receptor	Plasma Membrane	transmembrane receptor	5.72628e-05	1.70817e-06	up	3.57375	3.57375	1.83744
Role of Tissue Factor in Cancer	5.46	0.107	NaN	CXCL1	C-X-C motif chemokine ligand 1	Extracellular Space	cytokine	7.2018e-05	3.46222e-06	up	2.66667	2.66667	1.41504
Role of Tissue Factor in Cancer	5.46	0.107	NaN	RPS6KA5	ribosomal protein S6 kinase A5	Nucleus	kinase	0.000896053	0.000519236	up	2.57033	2.57033	1.36195
Role of Tissue Factor in Cancer	5.46	0.107	NaN	CSF2	colony stimulating factor 2	Extracellular Space	cytokine	0.000181511	2.91396e-05	up	3.2134	3.2134	1.6841
Role of Tissue Factor in Cancer	5.46	0.107	NaN	F3	coagulation factor III, tissue factor	Plasma Membrane	transmembrane receptor	0.000167293	2.45862e-05	up	2.83358	2.83358	1.50263
Role of Tissue Factor in Cancer	5.46	0.107	NaN	MMP1	matrix metallopeptidase 1	Extracellular Space	peptidase	2.99009e-05	6.82824e-08	up	3.68258	3.68258	1.88072
Role of Tissue Factor in Cancer	5.46	0.107	NaN	FGF5	fibroblast growth factor 5	Extracellular Space	growth factor	3.65159e-05	2.83522e-07	up	3.22383	3.22383	1.68878
Role of IL-17A in Psoriasis	5.22	0.385	NaN	CXCL8	C-X-C motif chemokine ligand 8	Extracellular Space	cytokine	4.70395e-05	7.41202e-07	up	6.01014	6.01014	2.5874
Role of IL-17A in Psoriasis	5.22	0.385	NaN	CXCL3	C-X-C motif chemokine ligand 3	Extracellular Space	cytokine	0.000453284	0.000162494	up	3.10131	3.10131	1.63288
Role of IL-17A in Psoriasis	5.22	0.385	NaN	CCL20	C-C motif chemokine ligand 20	Extracellular Space	cytokine	0.00012705	1.42377e-05	up	3.12207	3.12207	1.6425
Role of IL-17A in Psoriasis	5.22	0.385	NaN	CXCL1	C-X-C motif chemokine ligand 1	Extracellular Space	cytokine	7.2018e-05	3.46222e-06	up	2.66667	2.66667	1.41504
Role of IL-17A in Psoriasis	5.22	0.385	NaN	CXCL5	C-X-C motif chemokine ligand 5	Extracellular Space	cytokine	0.000517835	0.000205801	up	2.85352	2.85352	1.51274
Activation of IRF by Cytosolic Pattern Recognition Receptors	5.05	0.145	1	IFIH1	interferon induced with helicase C domain 1	Nucleus	enzyme	6.05334e-05	2.0177e-06	up	2.86486	2.86486	1.51846
Activation of IRF by Cytosolic Pattern Recognition Receptors	5.05	0.145	1	CD40	CD40 molecule	Plasma Membrane	transmembrane receptor	9.69248e-05	8.01981e-06	up	2.53917	2.53917	1.34436
Activation of IRF by Cytosolic Pattern Recognition Receptors	5.05	0.145	1	NFKBIE	NFKB inhibitor epsilon	Nucleus	transcription regulator	7.29755e-05	3.81911e-06	up	2.23963	2.23963	1.16326
Activation of IRF by Cytosolic Pattern Recognition Receptors	5.05	0.145	1	DDX58	DEXD/H-box helicase 58	Cytoplasm	enzyme	7.88016e-05	4.63882e-06	up	2.39664	2.39664	1.26101
Activation of IRF by Cytosolic Pattern Recognition Receptors	5.05	0.145	1	MAVS	mitochondrial antiviral signaling protein	Cytoplasm	other	0.001397	0.000996787	down	2.47268	-2.47268	-1.30607
Activation of IRF by Cytosolic Pattern Recognition Receptors	5.05	0.145	1	IRF9	interferon regulatory factor 9	Nucleus	transcription regulator	0.000133447	1.57552e-05	up	2.37847	2.37847	1.25003
Activation of IRF by Cytosolic Pattern Recognition Receptors	5.05	0.145	1	IL6	interleukin 6	Extracellular Space	cytokine	3.65159e-05	2.68298e-07	up	2.78882	2.78882	1.47965
Activation of IRF by Cytosolic Pattern Recognition Receptors	5.05	0.145	1	STAT1	signal transducer and activator of transcription 1	Nucleus	transcription regulator	0.000127302	1.44319e-05	down	2.48387	-2.48387	-1.31259
Activation of IRF by Cytosolic Pattern Recognition Receptors	5.05	0.145	1	TNF	tumor necrosis factor	Extracellular Space	cytokine	0.000291147	7.31026e-05	up	2.74571	2.74571	1.45718
Colorectal Cancer Metastasis Signaling	4.92	0.0729	0.243	MMP7	matrix metallopeptidase 7	Extracellular Space	peptidase	0.000324617	9.07357e-05	down	4.18581	-4.18581	-2.06551
Colorectal Cancer Metastasis Signaling	4.92	0.0729	0.243	MMP14	matrix metallopeptidase 14	Extracellular Space	peptidase	5.71384e-05	1.58188e-06	up	2.21198	2.21198	1.14534
Colorectal Cancer Metastasis Signaling	4.92	0.0729	0.243	FGFR2	fibroblast growth factor receptor 2	Plasma Membrane	kinase	0.000292993	7.4204e-05	down	4.45302	-4.45302	-2.15478
Colorectal Cancer Metastasis Signaling	4.92	0.0729	0.243	VEGFC	vascular endothelial growth factor C	Extracellular Space	growth factor	4.25833e-05	4.70028e-07	up	2.6596	2.6596	1.41121
Colorectal Cancer Metastasis Signaling	4.92	0.0729	0.243	IL6	interleukin 6	Extracellular Space	cytokine	3.65159e-05	2.68298e-07	up	2.78882	2.78882	1.47965
Colorectal Cancer Metastasis Signaling	4.92	0.0729	0.243	TLR2	toll like receptor 2	Plasma Membrane	transmembrane receptor	8.09449e-05	5.23963e-06	up	4.16405	4.16405	2.05799
Colorectal Cancer Metastasis Signaling	4.92	0.0729	0.243	FZD8	frizzled class receptor 8	Plasma Membrane	G-protein coupled receptor	0.000607384	0.000270472	up	2.43015	2.43015	1.28104
Colorectal Cancer Metastasis Signaling	4.92	0.0729	0.243	PRKAR2B	protein kinase cAMP-dependent type II regulatory subunit beta	Cytoplasm	kinase	0.000487765	0.000185126	down	3.53523	-3.53523	-1.8218
Colorectal Cancer Metastasis Signaling	4.92	0.0729	0.243	RHOB	ras homolog family member B	Cytoplasm	enzyme	6.81397e-05	2.79312e-06	down	3.93244	-3.93244	-1.97543
Colorectal Cancer Metastasis Signaling	4.92	0.0729	0.243	GAB1	GRB2 associated binding protein 1	Cytoplasm	kinase	0.000120758	1.28231e-05	down	2.38756	-2.38756	-1.25554
Colorectal Cancer Metastasis Signaling	4.92	0.0729	0.243	PTGER2	prostaglandin E receptor 2	Plasma Membrane	G-protein coupled receptor	0.000252601	5.47139e-05	down	2.17697	-2.17697	-1.12232
Colorectal Cancer Metastasis Signaling	4.92	0.0729	0.243	STAT1	signal transducer and activator of transcription 1	Nucleus	transcription regulator	0.000127302	1.44319e-05	down	2.48387	-2.48387	-1.31259
Colorectal Cancer Metastasis Signaling	4.92	0.0729	0.243	TNF	tumor necrosis factor	Extracellular Space	cytokine	0.000291147	7.31026e-05	up	2.74571	2.74571	1.45718
Colorectal Cancer Metastasis Signaling	4.92	0.0729	0.243	ADCY7	adenylate cyclase 7	Plasma Membrane	enzyme	0.000171656	2.62247e-05	down	2.13945	-2.13945	-1.09724
Colorectal Cancer Metastasis Signaling	4.92	0.0729	0.243	GNG12	G protein subunit gamma 12	Plasma Membrane	enzyme	0.000320542	8.8399e-05	down	3.05299	-3.05299	-1.61022
Colorectal Cancer Metastasis Signaling	4.92	0.0729	0.243	MMP9	matrix metallopeptidase 9	Extracellular Space	peptidase	0.000105861	9.4402e-06	up	5.58648	5.58648	2.48194
Colorectal Cancer Metastasis Signaling	4.92	0.0729	0.243	MMP1	matrix metallopeptidase 1	Extracellular Space	peptidase	2.99009e-05	6.82824e-08	up	3.68258	3.68258	1.88072
Colorectal Cancer Metastasis Signaling	4.92	0.0729	0.243	WNT5A	Wnt family member 5A	Extracellular Space	cytokine	9.09658e-05	6.84293e-06	up	3.07702	3.07702	1.62154
IL-17A Signaling in Gastric Cells	4.83	0.24	NaN	CXCL8	C-X-C motif chemokine ligand 8	Extracellular Space	cytokine	4.70395e-05	7.41202e-07	up	6.01014	6.01014	2.5874
IL-17A Signaling in Gastric Cells	4.83	0.24	NaN	CXCL11	C-X-C motif chemokine ligand 11	Other	cytokine	0.000621227	0.000282085	up	2.52305	2.52305	1.33517
IL-17A Signaling in Gastric Cells	4.83	0.24	NaN	CCL20	C-C motif chemokine ligand 20	Extracellular Space	cytokine	0.00012705	1.42377e-05	up	3.12207	3.12207	1.6425
IL-17A Signaling in Gastric Cells	4.83	0.24	NaN	CXCL1	C-X-C motif chemokine ligand 1	Extracellular Space	cytokine	7.2018e-05	3.46222e-06	up	2.66667	2.66667	1.41504
IL-17A Signaling in Gastric Cells	4.83	0.24	NaN	CCL5	C-C motif chemokine ligand 5	Extracellular Space	cytokine	0.000244253	5.08419e-05	up	3.69923	3.69923	1.88723
IL-17A Signaling in Gastric Cells	4.83	0.24	NaN	TNF	tumor necrosis factor	Extracellular Space	cytokine	0.000291147	7.31026e-05	up	2.74571	2.74571	1.45718
Role of Macrophages, Fibroblasts and Endothelial Cells in Rheumatoid Arthritis	4.64	0.0647	NaN	CXCL8	C-X-C motif chemokine ligand 8	Extracellular Space	cytokine	4.70395e-05	7.41202e-07	up	6.01014	6.01014	2.5874
Role of Macrophages, Fibroblasts and Endothelial Cells in Rheumatoid Arthritis	4.64	0.0647	NaN	SFRP4	secreted frizzled related protein 4	Plasma Membrane	transmembrane receptor	0.00117179	0.000782337	down	2.0725	-2.0725	-1.05137
Role of Macrophages, Fibroblasts and Endothelial Cells in Rheumatoid Arthritis	4.64	0.0647	NaN	ICAM1	intercellular adhesion molecule 1	Plasma Membrane	transmembrane receptor	4.25833e-05	4.82261e-07	up	4.88337	4.88337	2.28788
Role of Macrophages, Fibroblasts and Endothelial Cells in Rheumatoid Arthritis	4.64	0.0647	NaN	NFKBIE	NFKB inhibitor epsilon	Nucleus	transcription regulator	7.29755e-05	3.81911e-06	up	2.23963	2.23963	1.16326
Role of Macrophages, Fibroblasts and Endothelial Cells in Rheumatoid Arthritis	4.64	0.0647	NaN	FGFR2	fibroblast growth factor receptor 2	Plasma Membrane	kinase	0.000292993	7.4204e-05	down	4.45302	-4.45302	-2.15478
Role of Macrophages, Fibroblasts and Endothelial Cells in Rheumatoid Arthritis	4.64	0.0647	NaN	LTB	lymphotoxin beta	Extracellular Space	cytokine	0.000325041	9.10768e-05	up	3.23391	3.23391	1.69328
Role of Macrophages, Fibroblasts and Endothelial Cells in Rheumatoid Arthritis	4.64	0.0647	NaN	VEGFC	vascular endothelial growth factor C	Extracellular Space	growth factor	4.25833e-05	4.70028e-07	up	2.6596	2.6596	1.41121
Role of Macrophages, Fibroblasts and Endothelial Cells in Rheumatoid Arthritis	4.64	0.0647	NaN	IL6	interleukin 6	Extracellular Space	cytokine	3.65159e-05	2.68298e-07	up	2.78882	2.78882	1.47965
Role of Macrophages, Fibroblasts and Endothelial Cells in Rheumatoid Arthritis	4.64	0.0647	NaN	CCL5	C-C motif chemokine ligand 5	Extracellular Space	cytokine	0.000244253	5.08419e-05	up	3.69923	3.69923	1.88723
Role of Macrophages, Fibroblasts and Endothelial Cells in Rheumatoid Arthritis	4.64	0.0647	NaN	TLR2	toll like receptor 2	Plasma Membrane	transmembrane receptor	8.09449e-05	5.23963e-06	up	4.16405	4.16405	2.05799
Role of Macrophages, Fibroblasts and Endothelial Cells in Rheumatoid Arthritis	4.64	0.0647	NaN	FZD8	frizzled class receptor 8	Plasma Membrane	G-protein coupled receptor	0.000607384	0.000270472	up	2.43015	2.43015	1.28104
Role of Macrophages, Fibroblasts and Endothelial Cells in Rheumatoid Arthritis	4.64	0.0647	NaN	PLCB4	phospholipase C beta 4	Cytoplasm	enzyme	0.000577089	0.000248086	down	2.07794	-2.07794	-1.05515
Role of Macrophages, Fibroblasts and Endothelial Cells in Rheumatoid Arthritis	4.64	0.0647	NaN	CCL2	C-C motif chemokine ligand 2	Extracellular Space	cytokine	5.71384e-05	1.64325e-06	up	4.18932	4.18932	2.06672
Role of Macrophages, Fibroblasts and Endothelial Cells in Rheumatoid Arthritis	4.64	0.0647	NaN	GAB1	GRB2 associated binding protein 1	Cytoplasm	kinase	0.000120758	1.28231e-05	down	2.38756	-2.38756	-1.25554
Role of Macrophages, Fibroblasts and Endothelial Cells in Rheumatoid Arthritis	4.64	0.0647	NaN	CSF2	colony stimulating factor 2	Extracellular Space	cytokine	0.000181511	2.91396e-05	up	3.2134	3.2134	1.6841
Role of Macrophages, Fibroblasts and Endothelial Cells in Rheumatoid Arthritis	4.64	0.0647	NaN	TNF	tumor necrosis factor	Extracellular Space	cytokine	0.000291147	7.31026e-05	up	2.74571	2.74571	1.45718
Role of Macrophages, Fibroblasts and Endothelial Cells in Rheumatoid Arthritis	4.64	0.0647	NaN	MMP1	matrix metallopeptidase 1	Extracellular Space	peptidase	2.99009e-05	6.82824e-08	up	3.68258	3.68258	1.88072
Role of Macrophages, Fibroblasts and Endothelial Cells in Rheumatoid Arthritis	4.64	0.0647	NaN	WNT5A	Wnt family member 5A	Extracellular Space	cytokine	9.09658e-05	6.84293e-06	up	3.07702	3.07702	1.62154
Role of Macrophages, Fibroblasts and Endothelial Cells in Rheumatoid Arthritis	4.64	0.0647	NaN	IRAK2	interleukin 1 receptor associated kinase 2	Plasma Membrane	kinase	0.000118827	1.23196e-05	up	3.36683	3.36683	1.75139
Role of Macrophages, Fibroblasts and Endothelial Cells in Rheumatoid Arthritis	4.64	0.0647	NaN	TRAF1	TNF receptor associated factor 1	Cytoplasm	other	7.2424e-05	3.63029e-06	up	5.55985	5.55985	2.47505
Bladder Cancer Signaling	4.62	0.115	NaN	CXCL8	C-X-C motif chemokine ligand 8	Extracellular Space	cytokine	4.70395e-05	7.41202e-07	up	6.01014	6.01014	2.5874
Bladder Cancer Signaling	4.62	0.115	NaN	MMP7	matrix metallopeptidase 7	Extracellular Space	peptidase	0.000324617	9.07357e-05	down	4.18581	-4.18581	-2.06551
Bladder Cancer Signaling	4.62	0.115	NaN	MMP14	matrix metallopeptidase 14	Extracellular Space	peptidase	5.71384e-05	1.58188e-06	up	2.21198	2.21198	1.14534
Bladder Cancer Signaling	4.62	0.115	NaN	CDKN1A	cyclin-dependent kinase inhibitor 1A	Nucleus	kinase	0.000177018	2.76906e-05	up	2.34183	2.34183	1.22764
Bladder Cancer Signaling	4.62	0.115	NaN	VEGFC	vascular endothelial growth factor C	Extracellular Space	growth factor	4.25833e-05	4.70028e-07	up	2.6596	2.6596	1.41121
Bladder Cancer Signaling	4.62	0.115	NaN	RPS6KA5	ribosomal protein S6 kinase A5	Nucleus	kinase	0.000896053	0.000519236	up	2.57033	2.57033	1.36195
Bladder Cancer Signaling	4.62	0.115	NaN	MMP9	matrix metallopeptidase 9	Extracellular Space	peptidase	0.000105861	9.4402e-06	up	5.58648	5.58648	2.48194
Bladder Cancer Signaling	4.62	0.115	NaN	MMP1	matrix metallopeptidase 1	Extracellular Space	peptidase	2.99009e-05	6.82824e-08	up	3.68258	3.68258	1.88072
Bladder Cancer Signaling	4.62	0.115	NaN	FGF1	fibroblast growth factor 1	Extracellular Space	growth factor	0.000689416	0.000339749	up	2.7327	2.7327	1.45033
Bladder Cancer Signaling	4.62	0.115	NaN	FGF5	fibroblast growth factor 5	Extracellular Space	growth factor	3.65159e-05	2.83522e-07	up	3.22383	3.22383	1.68878
Toll-like Receptor Signaling	4.41	0.122	0.816	TLR2	toll like receptor 2	Plasma Membrane	transmembrane receptor	8.09449e-05	5.23963e-06	up	4.16405	4.16405	2.05799
Toll-like Receptor Signaling	4.41	0.122	0.816	LY96	lymphocyte antigen 96	Plasma Membrane	transmembrane receptor	0.000399174	0.000129442	up	2.09875	2.09875	1.06953
Toll-like Receptor Signaling	4.41	0.122	0.816	MAP3K1	mitogen-activated protein kinase kinase kinase 1	Cytoplasm	kinase	0.000104164	9.08987e-06	down	2.99182	-2.99182	-1.58102
Toll-like Receptor Signaling	4.41	0.122	0.816	TAB2	TGF-beta activated kinase 1/MAP3K7 binding protein 2	Cytoplasm	other	7.07354e-05	3.22612e-06	down	2.16795	-2.16795	-1.11633
Toll-like Receptor Signaling	4.41	0.122	0.816	TNFAIP3	TNF alpha induced protein 3	Nucleus	enzyme	4.63841e-05	6.73483e-07	up	3.2656	3.2656	1.70735
Toll-like Receptor Signaling	4.41	0.122	0.816	TNF	tumor necrosis factor	Extracellular Space	cytokine	0.000291147	7.31026e-05	up	2.74571	2.74571	1.45718
Toll-like Receptor Signaling	4.41	0.122	0.816	MAP4K4	mitogen-activated protein kinase kinase kinase kinase 4	Cytoplasm	kinase	0.000136555	1.64327e-05	up	2.15776	2.15776	1.10954
Toll-like Receptor Signaling	4.41	0.122	0.816	IRAK2	interleukin 1 receptor associated kinase 2	Plasma Membrane	kinase	0.000118827	1.23196e-05	up	3.36683	3.36683	1.75139
Toll-like Receptor Signaling	4.41	0.122	0.816	TRAF1	TNF receptor associated factor 1	Cytoplasm	other	7.2424e-05	3.63029e-06	up	5.55985	5.55985	2.47505
Role of IL-17F in Allergic Inflammatory Airway Diseases	4.31	0.159	2.646	CXCL8	C-X-C motif chemokine ligand 8	Extracellular Space	cytokine	4.70395e-05	7.41202e-07	up	6.01014	6.01014	2.5874
Role of IL-17F in Allergic Inflammatory Airway Diseases	4.31	0.159	2.646	CCL2	C-C motif chemokine ligand 2	Extracellular Space	cytokine	5.71384e-05	1.64325e-06	up	4.18932	4.18932	2.06672
Role of IL-17F in Allergic Inflammatory Airway Diseases	4.31	0.159	2.646	RPS6KA5	ribosomal protein S6 kinase A5	Nucleus	kinase	0.000896053	0.000519236	up	2.57033	2.57033	1.36195
Role of IL-17F in Allergic Inflammatory Airway Diseases	4.31	0.159	2.646	CXCL1	C-X-C motif chemokine ligand 1	Extracellular Space	cytokine	7.2018e-05	3.46222e-06	up	2.66667	2.66667	1.41504
Role of IL-17F in Allergic Inflammatory Airway Diseases	4.31	0.159	2.646	CXCL5	C-X-C motif chemokine ligand 5	Extracellular Space	cytokine	0.000517835	0.000205801	up	2.85352	2.85352	1.51274
Role of IL-17F in Allergic Inflammatory Airway Diseases	4.31	0.159	2.646	IL6	interleukin 6	Extracellular Space	cytokine	3.65159e-05	2.68298e-07	up	2.78882	2.78882	1.47965
Role of IL-17F in Allergic Inflammatory Airway Diseases	4.31	0.159	2.646	CSF2	colony stimulating factor 2	Extracellular Space	cytokine	0.000181511	2.91396e-05	up	3.2134	3.2134	1.6841
Coagulation System	3.95	0.171	1.633	PLAUR	plasminogen activator, urokinase receptor	Plasma Membrane	transmembrane receptor	5.72628e-05	1.70817e-06	up	3.57375	3.57375	1.83744
Coagulation System	3.95	0.171	1.633	PLAU	plasminogen activator, urokinase	Extracellular Space	peptidase	7.29755e-05	3.74487e-06	up	4.08751	4.08751	2.03122
Coagulation System	3.95	0.171	1.633	THBD	thrombomodulin	Plasma Membrane	transmembrane receptor	8.17504e-05	5.46994e-06	up	3.21574	3.21574	1.68515
Coagulation System	3.95	0.171	1.633	F3	coagulation factor III, tissue factor	Plasma Membrane	transmembrane receptor	0.000167293	2.45862e-05	up	2.83358	2.83358	1.50263
Coagulation System	3.95	0.171	1.633	PLAT	plasminogen activator, tissue type	Extracellular Space	peptidase	0.000324331	9.0357e-05	up	2.93037	2.93037	1.55108
Coagulation System	3.95	0.171	1.633	SERPIND1	serpin family D member 1	Extracellular Space	other	0.000730228	0.000373821	up	2.96837	2.96837	1.56967
Differential Regulation of Cytokine Production in Intestinal Epithelial Cells by IL-17A and IL-17F	3.88	0.217	NaN	CCL2	C-C motif chemokine ligand 2	Extracellular Space	cytokine	5.71384e-05	1.64325e-06	up	4.18932	4.18932	2.06672
Differential Regulation of Cytokine Production in Intestinal Epithelial Cells by IL-17A and IL-17F	3.88	0.217	NaN	CXCL1	C-X-C motif chemokine ligand 1	Extracellular Space	cytokine	7.2018e-05	3.46222e-06	up	2.66667	2.66667	1.41504
Differential Regulation of Cytokine Production in Intestinal Epithelial Cells by IL-17A and IL-17F	3.88	0.217	NaN	CCL5	C-C motif chemokine ligand 5	Extracellular Space	cytokine	0.000244253	5.08419e-05	up	3.69923	3.69923	1.88723
Differential Regulation of Cytokine Production in Intestinal Epithelial Cells by IL-17A and IL-17F	3.88	0.217	NaN	CSF2	colony stimulating factor 2	Extracellular Space	cytokine	0.000181511	2.91396e-05	up	3.2134	3.2134	1.6841
Differential Regulation of Cytokine Production in Intestinal Epithelial Cells by IL-17A and IL-17F	3.88	0.217	NaN	TNF	tumor necrosis factor	Extracellular Space	cytokine	0.000291147	7.31026e-05	up	2.74571	2.74571	1.45718
IL-8 Signaling	3.84	0.0711	1.941	CXCL8	C-X-C motif chemokine ligand 8	Extracellular Space	cytokine	4.70395e-05	7.41202e-07	up	6.01014	6.01014	2.5874
IL-8 Signaling	3.84	0.0711	1.941	ICAM1	intercellular adhesion molecule 1	Plasma Membrane	transmembrane receptor	4.25833e-05	4.82261e-07	up	4.88337	4.88337	2.28788
IL-8 Signaling	3.84	0.0711	1.941	VEGFC	vascular endothelial growth factor C	Extracellular Space	growth factor	4.25833e-05	4.70028e-07	up	2.6596	2.6596	1.41121
IL-8 Signaling	3.84	0.0711	1.941	FGFR2	fibroblast growth factor receptor 2	Plasma Membrane	kinase	0.000292993	7.4204e-05	down	4.45302	-4.45302	-2.15478
IL-8 Signaling	3.84	0.0711	1.941	HBEGF	heparin binding EGF like growth factor	Extracellular Space	growth factor	0.000324605	9.06211e-05	up	2.92802	2.92802	1.54993
IL-8 Signaling	3.84	0.0711	1.941	HMOX1	heme oxygenase 1	Cytoplasm	enzyme	3.07978e-05	1.0198e-07	up	7.17615	7.17615	2.84321
IL-8 Signaling	3.84	0.0711	1.941	RHOB	ras homolog family member B	Cytoplasm	enzyme	6.81397e-05	2.79312e-06	down	3.93244	-3.93244	-1.97543
IL-8 Signaling	3.84	0.0711	1.941	GAB1	GRB2 associated binding protein 1	Cytoplasm	kinase	0.000120758	1.28231e-05	down	2.38756	-2.38756	-1.25554
IL-8 Signaling	3.84	0.0711	1.941	NCF2	neutrophil cytosolic factor 2	Cytoplasm	enzyme	0.000241371	4.9582e-05	up	2.83754	2.83754	1.50464
IL-8 Signaling	3.84	0.0711	1.941	CXCL1	C-X-C motif chemokine ligand 1	Extracellular Space	cytokine	7.2018e-05	3.46222e-06	up	2.66667	2.66667	1.41504
IL-8 Signaling	3.84	0.0711	1.941	MAP4K4	mitogen-activated protein kinase kinase kinase kinase 4	Cytoplasm	kinase	0.000136555	1.64327e-05	up	2.15776	2.15776	1.10954
IL-8 Signaling	3.84	0.0711	1.941	GNG12	G protein subunit gamma 12	Plasma Membrane	enzyme	0.000320542	8.8399e-05	down	3.05299	-3.05299	-1.61022
IL-8 Signaling	3.84	0.0711	1.941	MMP9	matrix metallopeptidase 9	Extracellular Space	peptidase	0.000105861	9.4402e-06	up	5.58648	5.58648	2.48194
IL-8 Signaling	3.84	0.0711	1.941	IRAK2	interleukin 1 receptor associated kinase 2	Plasma Membrane	kinase	0.000118827	1.23196e-05	up	3.36683	3.36683	1.75139
Axonal Guidance Signaling	3.7	0.0513	NaN	MMP7	matrix metallopeptidase 7	Extracellular Space	peptidase	0.000324617	9.07357e-05	down	4.18581	-4.18581	-2.06551
Axonal Guidance Signaling	3.7	0.0513	NaN	PAPPA	pappalysin 1	Extracellular Space	peptidase	0.000596275	0.000262189	up	2.6645	2.6645	1.41387
Axonal Guidance Signaling	3.7	0.0513	NaN	RGS3	regulator of G-protein signaling 3	Nucleus	other	0.00146999	0.00106616	up	2.21155	2.21155	1.14506
Axonal Guidance Signaling	3.7	0.0513	NaN	NRP2	neuropilin 2	Plasma Membrane	kinase	0.000805229	0.000439483	down	2.02262	-2.02262	-1.01622
Axonal Guidance Signaling	3.7	0.0513	NaN	PTCH1	patched 1	Plasma Membrane	transmembrane receptor	0.000788746	0.000423282	down	2.08064	-2.08064	-1.05703
Axonal Guidance Signaling	3.7	0.0513	NaN	SEMA6A	semaphorin 6A	Plasma Membrane	transmembrane receptor	0.000689694	0.000340277	down	2.06704	-2.06704	-1.04756
Axonal Guidance Signaling	3.7	0.0513	NaN	ITGA2	integrin subunit alpha 2	Plasma Membrane	transmembrane receptor	0.000106124	9.61516e-06	up	4.46447	4.46447	2.15849
Axonal Guidance Signaling	3.7	0.0513	NaN	FGFR2	fibroblast growth factor receptor 2	Plasma Membrane	kinase	0.000292993	7.4204e-05	down	4.45302	-4.45302	-2.15478
Axonal Guidance Signaling	3.7	0.0513	NaN	VEGFC	vascular endothelial growth factor C	Extracellular Space	growth factor	4.25833e-05	4.70028e-07	up	2.6596	2.6596	1.41121
Axonal Guidance Signaling	3.7	0.0513	NaN	ADAMTS9	ADAM metallopeptidase with thrombospondin type 1 motif 9	Extracellular Space	peptidase	0.000362797	0.000109127	up	3.03762	3.03762	1.60294
Axonal Guidance Signaling	3.7	0.0513	NaN	RAP1A	RAP1A, member of RAS oncogene family	Cytoplasm	enzyme	5.67199e-05	1.48871e-06	up	2.16819	2.16819	1.11649
Axonal Guidance Signaling	3.7	0.0513	NaN	SEMA3A	semaphorin 3A	Extracellular Space	other	0.000519394	0.000207155	up	2.7446	2.7446	1.4566
Axonal Guidance Signaling	3.7	0.0513	NaN	FZD8	frizzled class receptor 8	Plasma Membrane	G-protein coupled receptor	0.000607384	0.000270472	up	2.43015	2.43015	1.28104
Axonal Guidance Signaling	3.7	0.0513	NaN	PLCB4	phospholipase C beta 4	Cytoplasm	enzyme	0.000577089	0.000248086	down	2.07794	-2.07794	-1.05515
Axonal Guidance Signaling	3.7	0.0513	NaN	EPHB1	EPH receptor B1	Plasma Membrane	kinase	0.0001348	1.60689e-05	up	2.30644	2.30644	1.20567
Axonal Guidance Signaling	3.7	0.0513	NaN	SEMA6D	semaphorin 6D	Plasma Membrane	other	0.000594512	0.000260818	down	2.52299	-2.52299	-1.33513
Axonal Guidance Signaling	3.7	0.0513	NaN	PRKAR2B	protein kinase cAMP-dependent type II regulatory subunit beta	Cytoplasm	kinase	0.000487765	0.000185126	down	3.53523	-3.53523	-1.8218
Axonal Guidance Signaling	3.7	0.0513	NaN	GAB1	GRB2 associated binding protein 1	Cytoplasm	kinase	0.000120758	1.28231e-05	down	2.38756	-2.38756	-1.25554
Axonal Guidance Signaling	3.7	0.0513	NaN	SEMA3C	semaphorin 3C	Extracellular Space	other	7.89682e-05	4.88712e-06	up	2.25702	2.25702	1.17442
Axonal Guidance Signaling	3.7	0.0513	NaN	MMP9	matrix metallopeptidase 9	Extracellular Space	peptidase	0.000105861	9.4402e-06	up	5.58648	5.58648	2.48194
Axonal Guidance Signaling	3.7	0.0513	NaN	GNG12	G protein subunit gamma 12	Plasma Membrane	enzyme	0.000320542	8.8399e-05	down	3.05299	-3.05299	-1.61022
Axonal Guidance Signaling	3.7	0.0513	NaN	WNT5A	Wnt family member 5A	Extracellular Space	cytokine	9.09658e-05	6.84293e-06	up	3.07702	3.07702	1.62154
Axonal Guidance Signaling	3.7	0.0513	NaN	SEMA7A	semaphorin 7A (John Milton Hagen blood group)	Plasma Membrane	transmembrane receptor	7.21903e-05	3.52387e-06	up	3.20441	3.20441	1.68006
HGF Signaling	3.59	0.087	-0.378	ETS1	ETS proto-oncogene 1, transcription factor	Nucleus	transcription regulator	0.000727446	0.000371116	up	2.14953	2.14953	1.10402
HGF Signaling	3.59	0.087	-0.378	ELF3	E74 like ETS transcription factor 3	Nucleus	transcription regulator	6.05334e-05	1.99347e-06	down	2.80437	-2.80437	-1.48768
HGF Signaling	3.59	0.087	-0.378	GAB1	GRB2 associated binding protein 1	Cytoplasm	kinase	0.000120758	1.28231e-05	down	2.38756	-2.38756	-1.25554
HGF Signaling	3.59	0.087	-0.378	CDKN1A	cyclin-dependent kinase inhibitor 1A	Nucleus	kinase	0.000177018	2.76906e-05	up	2.34183	2.34183	1.22764
HGF Signaling	3.59	0.087	-0.378	ITGA2	integrin subunit alpha 2	Plasma Membrane	transmembrane receptor	0.000106124	9.61516e-06	up	4.46447	4.46447	2.15849
HGF Signaling	3.59	0.087	-0.378	MAP3K1	mitogen-activated protein kinase kinase kinase 1	Cytoplasm	kinase	0.000104164	9.08987e-06	down	2.99182	-2.99182	-1.58102
HGF Signaling	3.59	0.087	-0.378	FGFR2	fibroblast growth factor receptor 2	Plasma Membrane	kinase	0.000292993	7.4204e-05	down	4.45302	-4.45302	-2.15478
HGF Signaling	3.59	0.087	-0.378	IL6	interleukin 6	Extracellular Space	cytokine	3.65159e-05	2.68298e-07	up	2.78882	2.78882	1.47965
HGF Signaling	3.59	0.087	-0.378	RAP1A	RAP1A, member of RAS oncogene family	Cytoplasm	enzyme	5.67199e-05	1.48871e-06	up	2.16819	2.16819	1.11649
HGF Signaling	3.59	0.087	-0.378	ELK3	ELK3, ETS transcription factor	Nucleus	transcription regulator	0.00024621	5.1675e-05	up	2.23868	2.23868	1.16265
IL-17A Signaling in Airway Cells	3.5	0.104	-1	CXCL3	C-X-C motif chemokine ligand 3	Extracellular Space	cytokine	0.000453284	0.000162494	up	3.10131	3.10131	1.63288
IL-17A Signaling in Airway Cells	3.5	0.104	-1	GAB1	GRB2 associated binding protein 1	Cytoplasm	kinase	0.000120758	1.28231e-05	down	2.38756	-2.38756	-1.25554
IL-17A Signaling in Airway Cells	3.5	0.104	-1	NFKBIE	NFKB inhibitor epsilon	Nucleus	transcription regulator	7.29755e-05	3.81911e-06	up	2.23963	2.23963	1.16326
IL-17A Signaling in Airway Cells	3.5	0.104	-1	CCL20	C-C motif chemokine ligand 20	Extracellular Space	cytokine	0.00012705	1.42377e-05	up	3.12207	3.12207	1.6425
IL-17A Signaling in Airway Cells	3.5	0.104	-1	FGFR2	fibroblast growth factor receptor 2	Plasma Membrane	kinase	0.000292993	7.4204e-05	down	4.45302	-4.45302	-2.15478
IL-17A Signaling in Airway Cells	3.5	0.104	-1	CXCL1	C-X-C motif chemokine ligand 1	Extracellular Space	cytokine	7.2018e-05	3.46222e-06	up	2.66667	2.66667	1.41504
IL-17A Signaling in Airway Cells	3.5	0.104	-1	CXCL5	C-X-C motif chemokine ligand 5	Extracellular Space	cytokine	0.000517835	0.000205801	up	2.85352	2.85352	1.51274
IL-17A Signaling in Airway Cells	3.5	0.104	-1	IL6	interleukin 6	Extracellular Space	cytokine	3.65159e-05	2.68298e-07	up	2.78882	2.78882	1.47965
VDR/RXR Activation	3.46	0.103	2.236	COL13A1	collagen type XIII alpha 1	Plasma Membrane	other	0.000438312	0.000152549	up	2.00617	2.00617	1.00444
VDR/RXR Activation	3.46	0.103	2.236	CDKN1A	cyclin-dependent kinase inhibitor 1A	Nucleus	kinase	0.000177018	2.76906e-05	up	2.34183	2.34183	1.22764
VDR/RXR Activation	3.46	0.103	2.236	IGFBP3	insulin like growth factor binding protein 3	Extracellular Space	other	2.3646e-05	3.67681e-08	down	2.30432	-2.30432	-1.20434
VDR/RXR Activation	3.46	0.103	2.236	VDR	vitamin D (1,25- dihydroxyvitamin D3) receptor	Nucleus	transcription regulator	0.000664155	0.000317745	up	3.17167	3.17167	1.66524
VDR/RXR Activation	3.46	0.103	2.236	CCL5	C-C motif chemokine ligand 5	Extracellular Space	cytokine	0.000244253	5.08419e-05	up	3.69923	3.69923	1.88723
VDR/RXR Activation	3.46	0.103	2.236	THBD	thrombomodulin	Plasma Membrane	transmembrane receptor	8.17504e-05	5.46994e-06	up	3.21574	3.21574	1.68515
VDR/RXR Activation	3.46	0.103	2.236	CSF2	colony stimulating factor 2	Extracellular Space	cytokine	0.000181511	2.91396e-05	up	3.2134	3.2134	1.6841
VDR/RXR Activation	3.46	0.103	2.236	KLF4	Kruppel-like factor 4 (gut)	Nucleus	transcription regulator	8.10095e-05	5.36545e-06	up	3.086	3.086	1.62574
CD40 Signaling	3.46	0.103	-0.378	ICAM1	intercellular adhesion molecule 1	Plasma Membrane	transmembrane receptor	4.25833e-05	4.82261e-07	up	4.88337	4.88337	2.28788
CD40 Signaling	3.46	0.103	-0.378	CD40	CD40 molecule	Plasma Membrane	transmembrane receptor	9.69248e-05	8.01981e-06	up	2.53917	2.53917	1.34436
CD40 Signaling	3.46	0.103	-0.378	GAB1	GRB2 associated binding protein 1	Cytoplasm	kinase	0.000120758	1.28231e-05	down	2.38756	-2.38756	-1.25554
CD40 Signaling	3.46	0.103	-0.378	NFKBIE	NFKB inhibitor epsilon	Nucleus	transcription regulator	7.29755e-05	3.81911e-06	up	2.23963	2.23963	1.16326
CD40 Signaling	3.46	0.103	-0.378	PTGS1	prostaglandin-endoperoxide synthase 1	Cytoplasm	enzyme	0.000467757	0.000172084	up	2.1589	2.1589	1.1103
CD40 Signaling	3.46	0.103	-0.378	TNFAIP3	TNF alpha induced protein 3	Nucleus	enzyme	4.63841e-05	6.73483e-07	up	3.2656	3.2656	1.70735
CD40 Signaling	3.46	0.103	-0.378	FGFR2	fibroblast growth factor receptor 2	Plasma Membrane	kinase	0.000292993	7.4204e-05	down	4.45302	-4.45302	-2.15478
CD40 Signaling	3.46	0.103	-0.378	TRAF1	TNF receptor associated factor 1	Cytoplasm	other	7.2424e-05	3.63029e-06	up	5.55985	5.55985	2.47505
Dendritic Cell Maturation	3.45	0.0684	1.387	TLR2	toll like receptor 2	Plasma Membrane	transmembrane receptor	8.09449e-05	5.23963e-06	up	4.16405	4.16405	2.05799
Dendritic Cell Maturation	3.45	0.0684	1.387	PLCB4	phospholipase C beta 4	Cytoplasm	enzyme	0.000577089	0.000248086	down	2.07794	-2.07794	-1.05515
Dendritic Cell Maturation	3.45	0.0684	1.387	ICAM1	intercellular adhesion molecule 1	Plasma Membrane	transmembrane receptor	4.25833e-05	4.82261e-07	up	4.88337	4.88337	2.28788
Dendritic Cell Maturation	3.45	0.0684	1.387	CD40	CD40 molecule	Plasma Membrane	transmembrane receptor	9.69248e-05	8.01981e-06	up	2.53917	2.53917	1.34436
Dendritic Cell Maturation	3.45	0.0684	1.387	GAB1	GRB2 associated binding protein 1	Cytoplasm	kinase	0.000120758	1.28231e-05	down	2.38756	-2.38756	-1.25554
Dendritic Cell Maturation	3.45	0.0684	1.387	NFKBIE	NFKB inhibitor epsilon	Nucleus	transcription regulator	7.29755e-05	3.81911e-06	up	2.23963	2.23963	1.16326
Dendritic Cell Maturation	3.45	0.0684	1.387	FGFR2	fibroblast growth factor receptor 2	Plasma Membrane	kinase	0.000292993	7.4204e-05	down	4.45302	-4.45302	-2.15478
Dendritic Cell Maturation	3.45	0.0684	1.387	LTB	lymphotoxin beta	Extracellular Space	cytokine	0.000325041	9.10768e-05	up	3.23391	3.23391	1.69328
Dendritic Cell Maturation	3.45	0.0684	1.387	CD83	CD83 molecule	Plasma Membrane	transmembrane receptor	4.38315e-05	5.49112e-07	up	3.66965	3.66965	1.87564
Dendritic Cell Maturation	3.45	0.0684	1.387	IL6	interleukin 6	Extracellular Space	cytokine	3.65159e-05	2.68298e-07	up	2.78882	2.78882	1.47965
Dendritic Cell Maturation	3.45	0.0684	1.387	CSF2	colony stimulating factor 2	Extracellular Space	cytokine	0.000181511	2.91396e-05	up	3.2134	3.2134	1.6841
Dendritic Cell Maturation	3.45	0.0684	1.387	STAT1	signal transducer and activator of transcription 1	Nucleus	transcription regulator	0.000127302	1.44319e-05	down	2.48387	-2.48387	-1.31259
Dendritic Cell Maturation	3.45	0.0684	1.387	TNF	tumor necrosis factor	Extracellular Space	cytokine	0.000291147	7.31026e-05	up	2.74571	2.74571	1.45718
Renin-Angiotensin Signaling	3.44	0.0833	NaN	PRKAR2B	protein kinase cAMP-dependent type II regulatory subunit beta	Cytoplasm	kinase	0.000487765	0.000185126	down	3.53523	-3.53523	-1.8218
Renin-Angiotensin Signaling	3.44	0.0833	NaN	CCL2	C-C motif chemokine ligand 2	Extracellular Space	cytokine	5.71384e-05	1.64325e-06	up	4.18932	4.18932	2.06672
Renin-Angiotensin Signaling	3.44	0.0833	NaN	GAB1	GRB2 associated binding protein 1	Cytoplasm	kinase	0.000120758	1.28231e-05	down	2.38756	-2.38756	-1.25554
Renin-Angiotensin Signaling	3.44	0.0833	NaN	MAP3K1	mitogen-activated protein kinase kinase kinase 1	Cytoplasm	kinase	0.000104164	9.08987e-06	down	2.99182	-2.99182	-1.58102
Renin-Angiotensin Signaling	3.44	0.0833	NaN	FGFR2	fibroblast growth factor receptor 2	Plasma Membrane	kinase	0.000292993	7.4204e-05	down	4.45302	-4.45302	-2.15478
Renin-Angiotensin Signaling	3.44	0.0833	NaN	PTGER2	prostaglandin E receptor 2	Plasma Membrane	G-protein coupled receptor	0.000252601	5.47139e-05	down	2.17697	-2.17697	-1.12232
Renin-Angiotensin Signaling	3.44	0.0833	NaN	CCL5	C-C motif chemokine ligand 5	Extracellular Space	cytokine	0.000244253	5.08419e-05	up	3.69923	3.69923	1.88723
Renin-Angiotensin Signaling	3.44	0.0833	NaN	STAT1	signal transducer and activator of transcription 1	Nucleus	transcription regulator	0.000127302	1.44319e-05	down	2.48387	-2.48387	-1.31259
Renin-Angiotensin Signaling	3.44	0.0833	NaN	ADCY7	adenylate cyclase 7	Plasma Membrane	enzyme	0.000171656	2.62247e-05	down	2.13945	-2.13945	-1.09724
Renin-Angiotensin Signaling	3.44	0.0833	NaN	TNF	tumor necrosis factor	Extracellular Space	cytokine	0.000291147	7.31026e-05	up	2.74571	2.74571	1.45718
TNFR2 Signaling	3.38	0.172	NaN	NFKBIE	NFKB inhibitor epsilon	Nucleus	transcription regulator	7.29755e-05	3.81911e-06	up	2.23963	2.23963	1.16326
TNFR2 Signaling	3.38	0.172	NaN	MAP3K1	mitogen-activated protein kinase kinase kinase 1	Cytoplasm	kinase	0.000104164	9.08987e-06	down	2.99182	-2.99182	-1.58102
TNFR2 Signaling	3.38	0.172	NaN	TNFAIP3	TNF alpha induced protein 3	Nucleus	enzyme	4.63841e-05	6.73483e-07	up	3.2656	3.2656	1.70735
TNFR2 Signaling	3.38	0.172	NaN	TNF	tumor necrosis factor	Extracellular Space	cytokine	0.000291147	7.31026e-05	up	2.74571	2.74571	1.45718
TNFR2 Signaling	3.38	0.172	NaN	TRAF1	TNF receptor associated factor 1	Cytoplasm	other	7.2424e-05	3.63029e-06	up	5.55985	5.55985	2.47505
ERK/MAPK Signaling	3.26	0.0653	0.277	ETS1	ETS proto-oncogene 1, transcription factor	Nucleus	transcription regulator	0.000727446	0.000371116	up	2.14953	2.14953	1.10402
ERK/MAPK Signaling	3.26	0.0653	0.277	DUSP6	dual specificity phosphatase 6	Cytoplasm	phosphatase	4.05507e-05	3.60207e-07	up	4.36083	4.36083	2.1246
ERK/MAPK Signaling	3.26	0.0653	0.277	ITGA2	integrin subunit alpha 2	Plasma Membrane	transmembrane receptor	0.000106124	9.61516e-06	up	4.46447	4.46447	2.15849
ERK/MAPK Signaling	3.26	0.0653	0.277	FGFR2	fibroblast growth factor receptor 2	Plasma Membrane	kinase	0.000292993	7.4204e-05	down	4.45302	-4.45302	-2.15478
ERK/MAPK Signaling	3.26	0.0653	0.277	RPS6KA5	ribosomal protein S6 kinase A5	Nucleus	kinase	0.000896053	0.000519236	up	2.57033	2.57033	1.36195
ERK/MAPK Signaling	3.26	0.0653	0.277	RAP1A	RAP1A, member of RAS oncogene family	Cytoplasm	enzyme	5.67199e-05	1.48871e-06	up	2.16819	2.16819	1.11649
ERK/MAPK Signaling	3.26	0.0653	0.277	PLA2G4A	phospholipase A2 group IVA	Cytoplasm	enzyme	0.000319621	8.78429e-05	up	2.0774	2.0774	1.05478
ERK/MAPK Signaling	3.26	0.0653	0.277	PRKAR2B	protein kinase cAMP-dependent type II regulatory subunit beta	Cytoplasm	kinase	0.000487765	0.000185126	down	3.53523	-3.53523	-1.8218
ERK/MAPK Signaling	3.26	0.0653	0.277	ELF3	E74 like ETS transcription factor 3	Nucleus	transcription regulator	6.05334e-05	1.99347e-06	down	2.80437	-2.80437	-1.48768
ERK/MAPK Signaling	3.26	0.0653	0.277	GAB1	GRB2 associated binding protein 1	Cytoplasm	kinase	0.000120758	1.28231e-05	down	2.38756	-2.38756	-1.25554
ERK/MAPK Signaling	3.26	0.0653	0.277	STAT1	signal transducer and activator of transcription 1	Nucleus	transcription regulator	0.000127302	1.44319e-05	down	2.48387	-2.48387	-1.31259
ERK/MAPK Signaling	3.26	0.0653	0.277	PPP2R1B	protein phosphatase 2 regulatory subunit A, beta	Plasma Membrane	phosphatase	0.00054298	0.000223565	down	3.20601	-3.20601	-1.68078
ERK/MAPK Signaling	3.26	0.0653	0.277	ELK3	ELK3, ETS transcription factor	Nucleus	transcription regulator	0.00024621	5.1675e-05	up	2.23868	2.23868	1.16265
Atherosclerosis Signaling	3.25	0.0787	NaN	CXCL8	C-X-C motif chemokine ligand 8	Extracellular Space	cytokine	4.70395e-05	7.41202e-07	up	6.01014	6.01014	2.5874
Atherosclerosis Signaling	3.25	0.0787	NaN	PLA2G4A	phospholipase A2 group IVA	Cytoplasm	enzyme	0.000319621	8.78429e-05	up	2.0774	2.0774	1.05478
Atherosclerosis Signaling	3.25	0.0787	NaN	ICAM1	intercellular adhesion molecule 1	Plasma Membrane	transmembrane receptor	4.25833e-05	4.82261e-07	up	4.88337	4.88337	2.28788
Atherosclerosis Signaling	3.25	0.0787	NaN	CCL2	C-C motif chemokine ligand 2	Extracellular Space	cytokine	5.71384e-05	1.64325e-06	up	4.18932	4.18932	2.06672
Atherosclerosis Signaling	3.25	0.0787	NaN	CD40	CD40 molecule	Plasma Membrane	transmembrane receptor	9.69248e-05	8.01981e-06	up	2.53917	2.53917	1.34436
Atherosclerosis Signaling	3.25	0.0787	NaN	IL6	interleukin 6	Extracellular Space	cytokine	3.65159e-05	2.68298e-07	up	2.78882	2.78882	1.47965
Atherosclerosis Signaling	3.25	0.0787	NaN	F3	coagulation factor III, tissue factor	Plasma Membrane	transmembrane receptor	0.000167293	2.45862e-05	up	2.83358	2.83358	1.50263
Atherosclerosis Signaling	3.25	0.0787	NaN	TNF	tumor necrosis factor	Extracellular Space	cytokine	0.000291147	7.31026e-05	up	2.74571	2.74571	1.45718
Atherosclerosis Signaling	3.25	0.0787	NaN	MMP9	matrix metallopeptidase 9	Extracellular Space	peptidase	0.000105861	9.4402e-06	up	5.58648	5.58648	2.48194
Atherosclerosis Signaling	3.25	0.0787	NaN	MMP1	matrix metallopeptidase 1	Extracellular Space	peptidase	2.99009e-05	6.82824e-08	up	3.68258	3.68258	1.88072
IL-17 Signaling	3.21	0.0941	NaN	CXCL8	C-X-C motif chemokine ligand 8	Extracellular Space	cytokine	4.70395e-05	7.41202e-07	up	6.01014	6.01014	2.5874
IL-17 Signaling	3.21	0.0941	NaN	CXCL11	C-X-C motif chemokine ligand 11	Other	cytokine	0.000621227	0.000282085	up	2.52305	2.52305	1.33517
IL-17 Signaling	3.21	0.0941	NaN	CCL2	C-C motif chemokine ligand 2	Extracellular Space	cytokine	5.71384e-05	1.64325e-06	up	4.18932	4.18932	2.06672
IL-17 Signaling	3.21	0.0941	NaN	GAB1	GRB2 associated binding protein 1	Cytoplasm	kinase	0.000120758	1.28231e-05	down	2.38756	-2.38756	-1.25554
IL-17 Signaling	3.21	0.0941	NaN	FGFR2	fibroblast growth factor receptor 2	Plasma Membrane	kinase	0.000292993	7.4204e-05	down	4.45302	-4.45302	-2.15478
IL-17 Signaling	3.21	0.0941	NaN	CXCL1	C-X-C motif chemokine ligand 1	Extracellular Space	cytokine	7.2018e-05	3.46222e-06	up	2.66667	2.66667	1.41504
IL-17 Signaling	3.21	0.0941	NaN	CXCL5	C-X-C motif chemokine ligand 5	Extracellular Space	cytokine	0.000517835	0.000205801	up	2.85352	2.85352	1.51274
IL-17 Signaling	3.21	0.0941	NaN	IL6	interleukin 6	Extracellular Space	cytokine	3.65159e-05	2.68298e-07	up	2.78882	2.78882	1.47965
NF-κB Signaling	3.13	0.0667	-1.155	TLR2	toll like receptor 2	Plasma Membrane	transmembrane receptor	8.09449e-05	5.23963e-06	up	4.16405	4.16405	2.05799
NF-κB Signaling	3.13	0.0667	-1.155	CD40	CD40 molecule	Plasma Membrane	transmembrane receptor	9.69248e-05	8.01981e-06	up	2.53917	2.53917	1.34436
NF-κB Signaling	3.13	0.0667	-1.155	GAB1	GRB2 associated binding protein 1	Cytoplasm	kinase	0.000120758	1.28231e-05	down	2.38756	-2.38756	-1.25554
NF-κB Signaling	3.13	0.0667	-1.155	UBE2N	ubiquitin conjugating enzyme E2 N	Cytoplasm	enzyme	0.000101046	8.66474e-06	down	2.23654	-2.23654	-1.16127
NF-κB Signaling	3.13	0.0667	-1.155	NFKBIE	NFKB inhibitor epsilon	Nucleus	transcription regulator	7.29755e-05	3.81911e-06	up	2.23963	2.23963	1.16326
NF-κB Signaling	3.13	0.0667	-1.155	PELI1	pellino E3 ubiquitin protein ligase 1	Cytoplasm	enzyme	0.00158172	0.00117464	down	2.50182	-2.50182	-1.32298
NF-κB Signaling	3.13	0.0667	-1.155	MAP3K1	mitogen-activated protein kinase kinase kinase 1	Cytoplasm	kinase	0.000104164	9.08987e-06	down	2.99182	-2.99182	-1.58102
NF-κB Signaling	3.13	0.0667	-1.155	TAB2	TGF-beta activated kinase 1/MAP3K7 binding protein 2	Cytoplasm	other	7.07354e-05	3.22612e-06	down	2.16795	-2.16795	-1.11633
NF-κB Signaling	3.13	0.0667	-1.155	TNFAIP3	TNF alpha induced protein 3	Nucleus	enzyme	4.63841e-05	6.73483e-07	up	3.2656	3.2656	1.70735
NF-κB Signaling	3.13	0.0667	-1.155	FGFR2	fibroblast growth factor receptor 2	Plasma Membrane	kinase	0.000292993	7.4204e-05	down	4.45302	-4.45302	-2.15478
NF-κB Signaling	3.13	0.0667	-1.155	TNF	tumor necrosis factor	Extracellular Space	cytokine	0.000291147	7.31026e-05	up	2.74571	2.74571	1.45718
NF-κB Signaling	3.13	0.0667	-1.155	MAP4K4	mitogen-activated protein kinase kinase kinase kinase 4	Cytoplasm	kinase	0.000136555	1.64327e-05	up	2.15776	2.15776	1.10954
HMGB1 Signaling	3.09	0.0752	1.265	CXCL8	C-X-C motif chemokine ligand 8	Extracellular Space	cytokine	4.70395e-05	7.41202e-07	up	6.01014	6.01014	2.5874
HMGB1 Signaling	3.09	0.0752	1.265	ICAM1	intercellular adhesion molecule 1	Plasma Membrane	transmembrane receptor	4.25833e-05	4.82261e-07	up	4.88337	4.88337	2.28788
HMGB1 Signaling	3.09	0.0752	1.265	CCL2	C-C motif chemokine ligand 2	Extracellular Space	cytokine	5.71384e-05	1.64325e-06	up	4.18932	4.18932	2.06672
HMGB1 Signaling	3.09	0.0752	1.265	GAB1	GRB2 associated binding protein 1	Cytoplasm	kinase	0.000120758	1.28231e-05	down	2.38756	-2.38756	-1.25554
HMGB1 Signaling	3.09	0.0752	1.265	RHOB	ras homolog family member B	Cytoplasm	enzyme	6.81397e-05	2.79312e-06	down	3.93244	-3.93244	-1.97543
HMGB1 Signaling	3.09	0.0752	1.265	FGFR2	fibroblast growth factor receptor 2	Plasma Membrane	kinase	0.000292993	7.4204e-05	down	4.45302	-4.45302	-2.15478
HMGB1 Signaling	3.09	0.0752	1.265	IL6	interleukin 6	Extracellular Space	cytokine	3.65159e-05	2.68298e-07	up	2.78882	2.78882	1.47965
HMGB1 Signaling	3.09	0.0752	1.265	CSF2	colony stimulating factor 2	Extracellular Space	cytokine	0.000181511	2.91396e-05	up	3.2134	3.2134	1.6841
HMGB1 Signaling	3.09	0.0752	1.265	TNF	tumor necrosis factor	Extracellular Space	cytokine	0.000291147	7.31026e-05	up	2.74571	2.74571	1.45718
HMGB1 Signaling	3.09	0.0752	1.265	PLAT	plasminogen activator, tissue type	Extracellular Space	peptidase	0.000324331	9.0357e-05	up	2.93037	2.93037	1.55108
Communication between Innate and Adaptive Immune Cells	3.08	0.0899	NaN	TLR2	toll like receptor 2	Plasma Membrane	transmembrane receptor	8.09449e-05	5.23963e-06	up	4.16405	4.16405	2.05799
Communication between Innate and Adaptive Immune Cells	3.08	0.0899	NaN	CXCL8	C-X-C motif chemokine ligand 8	Extracellular Space	cytokine	4.70395e-05	7.41202e-07	up	6.01014	6.01014	2.5874
Communication between Innate and Adaptive Immune Cells	3.08	0.0899	NaN	CD40	CD40 molecule	Plasma Membrane	transmembrane receptor	9.69248e-05	8.01981e-06	up	2.53917	2.53917	1.34436
Communication between Innate and Adaptive Immune Cells	3.08	0.0899	NaN	CD83	CD83 molecule	Plasma Membrane	transmembrane receptor	4.38315e-05	5.49112e-07	up	3.66965	3.66965	1.87564
Communication between Innate and Adaptive Immune Cells	3.08	0.0899	NaN	CCL5	C-C motif chemokine ligand 5	Extracellular Space	cytokine	0.000244253	5.08419e-05	up	3.69923	3.69923	1.88723
Communication between Innate and Adaptive Immune Cells	3.08	0.0899	NaN	IL6	interleukin 6	Extracellular Space	cytokine	3.65159e-05	2.68298e-07	up	2.78882	2.78882	1.47965
Communication between Innate and Adaptive Immune Cells	3.08	0.0899	NaN	CSF2	colony stimulating factor 2	Extracellular Space	cytokine	0.000181511	2.91396e-05	up	3.2134	3.2134	1.6841
Communication between Innate and Adaptive Immune Cells	3.08	0.0899	NaN	TNF	tumor necrosis factor	Extracellular Space	cytokine	0.000291147	7.31026e-05	up	2.74571	2.74571	1.45718
IL-17A Signaling in Fibroblasts	3	0.143	NaN	CCL2	C-C motif chemokine ligand 2	Extracellular Space	cytokine	5.71384e-05	1.64325e-06	up	4.18932	4.18932	2.06672
IL-17A Signaling in Fibroblasts	3	0.143	NaN	NFKBIE	NFKB inhibitor epsilon	Nucleus	transcription regulator	7.29755e-05	3.81911e-06	up	2.23963	2.23963	1.16326
IL-17A Signaling in Fibroblasts	3	0.143	NaN	CXCL5	C-X-C motif chemokine ligand 5	Extracellular Space	cytokine	0.000517835	0.000205801	up	2.85352	2.85352	1.51274
IL-17A Signaling in Fibroblasts	3	0.143	NaN	IL6	interleukin 6	Extracellular Space	cytokine	3.65159e-05	2.68298e-07	up	2.78882	2.78882	1.47965
IL-17A Signaling in Fibroblasts	3	0.143	NaN	MMP1	matrix metallopeptidase 1	Extracellular Space	peptidase	2.99009e-05	6.82824e-08	up	3.68258	3.68258	1.88072
Production of Nitric Oxide and Reactive Oxygen Species in Macrophages	2.86	0.0622	-0.302	TLR2	toll like receptor 2	Plasma Membrane	transmembrane receptor	8.09449e-05	5.23963e-06	up	4.16405	4.16405	2.05799
Production of Nitric Oxide and Reactive Oxygen Species in Macrophages	2.86	0.0622	-0.302	GAB1	GRB2 associated binding protein 1	Cytoplasm	kinase	0.000120758	1.28231e-05	down	2.38756	-2.38756	-1.25554
Production of Nitric Oxide and Reactive Oxygen Species in Macrophages	2.86	0.0622	-0.302	RHOB	ras homolog family member B	Cytoplasm	enzyme	6.81397e-05	2.79312e-06	down	3.93244	-3.93244	-1.97543
Production of Nitric Oxide and Reactive Oxygen Species in Macrophages	2.86	0.0622	-0.302	NFKBIE	NFKB inhibitor epsilon	Nucleus	transcription regulator	7.29755e-05	3.81911e-06	up	2.23963	2.23963	1.16326
Production of Nitric Oxide and Reactive Oxygen Species in Macrophages	2.86	0.0622	-0.302	NCF2	neutrophil cytosolic factor 2	Cytoplasm	enzyme	0.000241371	4.9582e-05	up	2.83754	2.83754	1.50464
Production of Nitric Oxide and Reactive Oxygen Species in Macrophages	2.86	0.0622	-0.302	MAP3K1	mitogen-activated protein kinase kinase kinase 1	Cytoplasm	kinase	0.000104164	9.08987e-06	down	2.99182	-2.99182	-1.58102
Production of Nitric Oxide and Reactive Oxygen Species in Macrophages	2.86	0.0622	-0.302	FGFR2	fibroblast growth factor receptor 2	Plasma Membrane	kinase	0.000292993	7.4204e-05	down	4.45302	-4.45302	-2.15478
Production of Nitric Oxide and Reactive Oxygen Species in Macrophages	2.86	0.0622	-0.302	ARG2	arginase 2	Cytoplasm	enzyme	0.000291983	7.3746e-05	up	2.06061	2.06061	1.04307
Production of Nitric Oxide and Reactive Oxygen Species in Macrophages	2.86	0.0622	-0.302	STAT1	signal transducer and activator of transcription 1	Nucleus	transcription regulator	0.000127302	1.44319e-05	down	2.48387	-2.48387	-1.31259
Production of Nitric Oxide and Reactive Oxygen Species in Macrophages	2.86	0.0622	-0.302	PPP2R1B	protein phosphatase 2 regulatory subunit A, beta	Plasma Membrane	phosphatase	0.00054298	0.000223565	down	3.20601	-3.20601	-1.68078
Production of Nitric Oxide and Reactive Oxygen Species in Macrophages	2.86	0.0622	-0.302	TNF	tumor necrosis factor	Extracellular Space	cytokine	0.000291147	7.31026e-05	up	2.74571	2.74571	1.45718
Production of Nitric Oxide and Reactive Oxygen Species in Macrophages	2.86	0.0622	-0.302	RAP1A	RAP1A, member of RAS oncogene family	Cytoplasm	enzyme	5.67199e-05	1.48871e-06	up	2.16819	2.16819	1.11649
LXR/RXR Activation	2.8	0.0744	-0.333	LY96	lymphocyte antigen 96	Plasma Membrane	transmembrane receptor	0.000399174	0.000129442	up	2.09875	2.09875	1.06953
LXR/RXR Activation	2.8	0.0744	-0.333	C3	complement component 3	Extracellular Space	peptidase	0.000166276	2.38974e-05	up	3.15758	3.15758	1.65882
LXR/RXR Activation	2.8	0.0744	-0.333	CCL2	C-C motif chemokine ligand 2	Extracellular Space	cytokine	5.71384e-05	1.64325e-06	up	4.18932	4.18932	2.06672
LXR/RXR Activation	2.8	0.0744	-0.333	SAA1	serum amyloid A1	Extracellular Space	transporter	7.47863e-05	4.10752e-06	up	2.96712	2.96712	1.56907
LXR/RXR Activation	2.8	0.0744	-0.333	ARG2	arginase 2	Cytoplasm	enzyme	0.000291983	7.3746e-05	up	2.06061	2.06061	1.04307
LXR/RXR Activation	2.8	0.0744	-0.333	SAA2	serum amyloid A2	Extracellular Space	other	0.000270696	6.3702e-05	up	2.83328	2.83328	1.50248
LXR/RXR Activation	2.8	0.0744	-0.333	IL6	interleukin 6	Extracellular Space	cytokine	3.65159e-05	2.68298e-07	up	2.78882	2.78882	1.47965
LXR/RXR Activation	2.8	0.0744	-0.333	TNF	tumor necrosis factor	Extracellular Space	cytokine	0.000291147	7.31026e-05	up	2.74571	2.74571	1.45718
LXR/RXR Activation	2.8	0.0744	-0.333	MMP9	matrix metallopeptidase 9	Extracellular Space	peptidase	0.000105861	9.4402e-06	up	5.58648	5.58648	2.48194
Role of Osteoblasts, Osteoclasts and Chondrocytes in Rheumatoid Arthritis	2.65	0.056	NaN	FZD8	frizzled class receptor 8	Plasma Membrane	G-protein coupled receptor	0.000607384	0.000270472	up	2.43015	2.43015	1.28104
Role of Osteoblasts, Osteoclasts and Chondrocytes in Rheumatoid Arthritis	2.65	0.056	NaN	SFRP4	secreted frizzled related protein 4	Plasma Membrane	transmembrane receptor	0.00117179	0.000782337	down	2.0725	-2.0725	-1.05137
Role of Osteoblasts, Osteoclasts and Chondrocytes in Rheumatoid Arthritis	2.65	0.056	NaN	GAB1	GRB2 associated binding protein 1	Cytoplasm	kinase	0.000120758	1.28231e-05	down	2.38756	-2.38756	-1.25554
Role of Osteoblasts, Osteoclasts and Chondrocytes in Rheumatoid Arthritis	2.65	0.056	NaN	MMP14	matrix metallopeptidase 14	Extracellular Space	peptidase	5.71384e-05	1.58188e-06	up	2.21198	2.21198	1.14534
Role of Osteoblasts, Osteoclasts and Chondrocytes in Rheumatoid Arthritis	2.65	0.056	NaN	NFKBIE	NFKB inhibitor epsilon	Nucleus	transcription regulator	7.29755e-05	3.81911e-06	up	2.23963	2.23963	1.16326
Role of Osteoblasts, Osteoclasts and Chondrocytes in Rheumatoid Arthritis	2.65	0.056	NaN	ITGA2	integrin subunit alpha 2	Plasma Membrane	transmembrane receptor	0.000106124	9.61516e-06	up	4.46447	4.46447	2.15849
Role of Osteoblasts, Osteoclasts and Chondrocytes in Rheumatoid Arthritis	2.65	0.056	NaN	TAB2	TGF-beta activated kinase 1/MAP3K7 binding protein 2	Cytoplasm	other	7.07354e-05	3.22612e-06	down	2.16795	-2.16795	-1.11633
Role of Osteoblasts, Osteoclasts and Chondrocytes in Rheumatoid Arthritis	2.65	0.056	NaN	FGFR2	fibroblast growth factor receptor 2	Plasma Membrane	kinase	0.000292993	7.4204e-05	down	4.45302	-4.45302	-2.15478
Role of Osteoblasts, Osteoclasts and Chondrocytes in Rheumatoid Arthritis	2.65	0.056	NaN	IL6	interleukin 6	Extracellular Space	cytokine	3.65159e-05	2.68298e-07	up	2.78882	2.78882	1.47965
Role of Osteoblasts, Osteoclasts and Chondrocytes in Rheumatoid Arthritis	2.65	0.056	NaN	CSF2	colony stimulating factor 2	Extracellular Space	cytokine	0.000181511	2.91396e-05	up	3.2134	3.2134	1.6841
Role of Osteoblasts, Osteoclasts and Chondrocytes in Rheumatoid Arthritis	2.65	0.056	NaN	TNF	tumor necrosis factor	Extracellular Space	cytokine	0.000291147	7.31026e-05	up	2.74571	2.74571	1.45718
Role of Osteoblasts, Osteoclasts and Chondrocytes in Rheumatoid Arthritis	2.65	0.056	NaN	MMP1	matrix metallopeptidase 1	Extracellular Space	peptidase	2.99009e-05	6.82824e-08	up	3.68258	3.68258	1.88072
Role of Osteoblasts, Osteoclasts and Chondrocytes in Rheumatoid Arthritis	2.65	0.056	NaN	WNT5A	Wnt family member 5A	Extracellular Space	cytokine	9.09658e-05	6.84293e-06	up	3.07702	3.07702	1.62154
Role of Hypercytokinemia/hyperchemokinemia in the Pathogenesis of Influenza	2.59	0.116	NaN	CXCL8	C-X-C motif chemokine ligand 8	Extracellular Space	cytokine	4.70395e-05	7.41202e-07	up	6.01014	6.01014	2.5874
Role of Hypercytokinemia/hyperchemokinemia in the Pathogenesis of Influenza	2.59	0.116	NaN	CCL2	C-C motif chemokine ligand 2	Extracellular Space	cytokine	5.71384e-05	1.64325e-06	up	4.18932	4.18932	2.06672
Role of Hypercytokinemia/hyperchemokinemia in the Pathogenesis of Influenza	2.59	0.116	NaN	CCL5	C-C motif chemokine ligand 5	Extracellular Space	cytokine	0.000244253	5.08419e-05	up	3.69923	3.69923	1.88723
Role of Hypercytokinemia/hyperchemokinemia in the Pathogenesis of Influenza	2.59	0.116	NaN	IL6	interleukin 6	Extracellular Space	cytokine	3.65159e-05	2.68298e-07	up	2.78882	2.78882	1.47965
Role of Hypercytokinemia/hyperchemokinemia in the Pathogenesis of Influenza	2.59	0.116	NaN	TNF	tumor necrosis factor	Extracellular Space	cytokine	0.000291147	7.31026e-05	up	2.74571	2.74571	1.45718
Guanosine Nucleotides Degradation III	2.57	0.231	NaN	NT5E	5'-nucleotidase ecto	Plasma Membrane	phosphatase	8.09449e-05	5.25908e-06	up	3.37637	3.37637	1.75547
Guanosine Nucleotides Degradation III	2.57	0.231	NaN	XDH	xanthine dehydrogenase	Cytoplasm	enzyme	0.000240351	4.90388e-05	up	2.04405	2.04405	1.03143
Guanosine Nucleotides Degradation III	2.57	0.231	NaN	PNP	purine nucleoside phosphorylase	Nucleus	enzyme	0.000136714	1.65212e-05	up	2.01143	2.01143	1.00822
Urate Biosynthesis/Inosine 5'-phosphate Degradation	2.48	0.214	NaN	NT5E	5'-nucleotidase ecto	Plasma Membrane	phosphatase	8.09449e-05	5.25908e-06	up	3.37637	3.37637	1.75547
Urate Biosynthesis/Inosine 5'-phosphate Degradation	2.48	0.214	NaN	XDH	xanthine dehydrogenase	Cytoplasm	enzyme	0.000240351	4.90388e-05	up	2.04405	2.04405	1.03143
Urate Biosynthesis/Inosine 5'-phosphate Degradation	2.48	0.214	NaN	PNP	purine nucleoside phosphorylase	Nucleus	enzyme	0.000136714	1.65212e-05	up	2.01143	2.01143	1.00822
Telomerase Signaling	2.46	0.0721	0	ETS1	ETS proto-oncogene 1, transcription factor	Nucleus	transcription regulator	0.000727446	0.000371116	up	2.14953	2.14953	1.10402
Telomerase Signaling	2.46	0.0721	0	ELF3	E74 like ETS transcription factor 3	Nucleus	transcription regulator	6.05334e-05	1.99347e-06	down	2.80437	-2.80437	-1.48768
Telomerase Signaling	2.46	0.0721	0	GAB1	GRB2 associated binding protein 1	Cytoplasm	kinase	0.000120758	1.28231e-05	down	2.38756	-2.38756	-1.25554
Telomerase Signaling	2.46	0.0721	0	CDKN1A	cyclin-dependent kinase inhibitor 1A	Nucleus	kinase	0.000177018	2.76906e-05	up	2.34183	2.34183	1.22764
Telomerase Signaling	2.46	0.0721	0	FGFR2	fibroblast growth factor receptor 2	Plasma Membrane	kinase	0.000292993	7.4204e-05	down	4.45302	-4.45302	-2.15478
Telomerase Signaling	2.46	0.0721	0	PPP2R1B	protein phosphatase 2 regulatory subunit A, beta	Plasma Membrane	phosphatase	0.00054298	0.000223565	down	3.20601	-3.20601	-1.68078
Telomerase Signaling	2.46	0.0721	0	TERF1	telomeric repeat binding factor 1	Nucleus	other	8.51936e-05	5.98124e-06	down	2.0612	-2.0612	-1.04349
Telomerase Signaling	2.46	0.0721	0	ELK3	ELK3, ETS transcription factor	Nucleus	transcription regulator	0.00024621	5.1675e-05	up	2.23868	2.23868	1.16265
IL-10 Signaling	2.39	0.0882	NaN	HMOX1	heme oxygenase 1	Cytoplasm	enzyme	3.07978e-05	1.0198e-07	up	7.17615	7.17615	2.84321
IL-10 Signaling	2.39	0.0882	NaN	NFKBIE	NFKB inhibitor epsilon	Nucleus	transcription regulator	7.29755e-05	3.81911e-06	up	2.23963	2.23963	1.16326
IL-10 Signaling	2.39	0.0882	NaN	ARG2	arginase 2	Cytoplasm	enzyme	0.000291983	7.3746e-05	up	2.06061	2.06061	1.04307
IL-10 Signaling	2.39	0.0882	NaN	IL6	interleukin 6	Extracellular Space	cytokine	3.65159e-05	2.68298e-07	up	2.78882	2.78882	1.47965
IL-10 Signaling	2.39	0.0882	NaN	TNF	tumor necrosis factor	Extracellular Space	cytokine	0.000291147	7.31026e-05	up	2.74571	2.74571	1.45718
IL-10 Signaling	2.39	0.0882	NaN	MAP4K4	mitogen-activated protein kinase kinase kinase kinase 4	Cytoplasm	kinase	0.000136555	1.64327e-05	up	2.15776	2.15776	1.10954
IL-1 Signaling	2.37	0.0769	-0.816	PRKAR2B	protein kinase cAMP-dependent type II regulatory subunit beta	Cytoplasm	kinase	0.000487765	0.000185126	down	3.53523	-3.53523	-1.8218
IL-1 Signaling	2.37	0.0769	-0.816	NFKBIE	NFKB inhibitor epsilon	Nucleus	transcription regulator	7.29755e-05	3.81911e-06	up	2.23963	2.23963	1.16326
IL-1 Signaling	2.37	0.0769	-0.816	MAP3K1	mitogen-activated protein kinase kinase kinase 1	Cytoplasm	kinase	0.000104164	9.08987e-06	down	2.99182	-2.99182	-1.58102
IL-1 Signaling	2.37	0.0769	-0.816	TAB2	TGF-beta activated kinase 1/MAP3K7 binding protein 2	Cytoplasm	other	7.07354e-05	3.22612e-06	down	2.16795	-2.16795	-1.11633
IL-1 Signaling	2.37	0.0769	-0.816	ADCY7	adenylate cyclase 7	Plasma Membrane	enzyme	0.000171656	2.62247e-05	down	2.13945	-2.13945	-1.09724
IL-1 Signaling	2.37	0.0769	-0.816	GNG12	G protein subunit gamma 12	Plasma Membrane	enzyme	0.000320542	8.8399e-05	down	3.05299	-3.05299	-1.61022
IL-1 Signaling	2.37	0.0769	-0.816	IRAK2	interleukin 1 receptor associated kinase 2	Plasma Membrane	kinase	0.000118827	1.23196e-05	up	3.36683	3.36683	1.75139
HIF1α Signaling	2.37	0.0696	NaN	MMP7	matrix metallopeptidase 7	Extracellular Space	peptidase	0.000324617	9.07357e-05	down	4.18581	-4.18581	-2.06551
HIF1α Signaling	2.37	0.0696	NaN	GAB1	GRB2 associated binding protein 1	Cytoplasm	kinase	0.000120758	1.28231e-05	down	2.38756	-2.38756	-1.25554
HIF1α Signaling	2.37	0.0696	NaN	MMP14	matrix metallopeptidase 14	Extracellular Space	peptidase	5.71384e-05	1.58188e-06	up	2.21198	2.21198	1.14534
HIF1α Signaling	2.37	0.0696	NaN	VEGFC	vascular endothelial growth factor C	Extracellular Space	growth factor	4.25833e-05	4.70028e-07	up	2.6596	2.6596	1.41121
HIF1α Signaling	2.37	0.0696	NaN	FGFR2	fibroblast growth factor receptor 2	Plasma Membrane	kinase	0.000292993	7.4204e-05	down	4.45302	-4.45302	-2.15478
HIF1α Signaling	2.37	0.0696	NaN	EGLN3	egl-9 family hypoxia-inducible factor 3	Cytoplasm	enzyme	0.000151048	1.99892e-05	down	2.79284	-2.79284	-1.48173
HIF1α Signaling	2.37	0.0696	NaN	MMP9	matrix metallopeptidase 9	Extracellular Space	peptidase	0.000105861	9.4402e-06	up	5.58648	5.58648	2.48194
HIF1α Signaling	2.37	0.0696	NaN	MMP1	matrix metallopeptidase 1	Extracellular Space	peptidase	2.99009e-05	6.82824e-08	up	3.68258	3.68258	1.88072
Glioma Invasiveness Signaling	2.33	0.0857	0	GAB1	GRB2 associated binding protein 1	Cytoplasm	kinase	0.000120758	1.28231e-05	down	2.38756	-2.38756	-1.25554
Glioma Invasiveness Signaling	2.33	0.0857	0	RHOB	ras homolog family member B	Cytoplasm	enzyme	6.81397e-05	2.79312e-06	down	3.93244	-3.93244	-1.97543
Glioma Invasiveness Signaling	2.33	0.0857	0	PLAUR	plasminogen activator, urokinase receptor	Plasma Membrane	transmembrane receptor	5.72628e-05	1.70817e-06	up	3.57375	3.57375	1.83744
Glioma Invasiveness Signaling	2.33	0.0857	0	FGFR2	fibroblast growth factor receptor 2	Plasma Membrane	kinase	0.000292993	7.4204e-05	down	4.45302	-4.45302	-2.15478
Glioma Invasiveness Signaling	2.33	0.0857	0	PLAU	plasminogen activator, urokinase	Extracellular Space	peptidase	7.29755e-05	3.74487e-06	up	4.08751	4.08751	2.03122
Glioma Invasiveness Signaling	2.33	0.0857	0	MMP9	matrix metallopeptidase 9	Extracellular Space	peptidase	0.000105861	9.4402e-06	up	5.58648	5.58648	2.48194
Acute Phase Response Signaling	2.32	0.0592	0.816	HMOX1	heme oxygenase 1	Cytoplasm	enzyme	3.07978e-05	1.0198e-07	up	7.17615	7.17615	2.84321
Acute Phase Response Signaling	2.32	0.0592	0.816	SOD2	superoxide dismutase 2, mitochondrial	Cytoplasm	enzyme	5.71384e-05	1.58904e-06	up	2.2088	2.2088	1.14326
Acute Phase Response Signaling	2.32	0.0592	0.816	C3	complement component 3	Extracellular Space	peptidase	0.000166276	2.38974e-05	up	3.15758	3.15758	1.65882
Acute Phase Response Signaling	2.32	0.0592	0.816	SAA1	serum amyloid A1	Extracellular Space	transporter	7.47863e-05	4.10752e-06	up	2.96712	2.96712	1.56907
Acute Phase Response Signaling	2.32	0.0592	0.816	NFKBIE	NFKB inhibitor epsilon	Nucleus	transcription regulator	7.29755e-05	3.81911e-06	up	2.23963	2.23963	1.16326
Acute Phase Response Signaling	2.32	0.0592	0.816	MAP3K1	mitogen-activated protein kinase kinase kinase 1	Cytoplasm	kinase	0.000104164	9.08987e-06	down	2.99182	-2.99182	-1.58102
Acute Phase Response Signaling	2.32	0.0592	0.816	SAA2	serum amyloid A2	Extracellular Space	other	0.000270696	6.3702e-05	up	2.83328	2.83328	1.50248
Acute Phase Response Signaling	2.32	0.0592	0.816	IL6	interleukin 6	Extracellular Space	cytokine	3.65159e-05	2.68298e-07	up	2.78882	2.78882	1.47965
Acute Phase Response Signaling	2.32	0.0592	0.816	TNF	tumor necrosis factor	Extracellular Space	cytokine	0.000291147	7.31026e-05	up	2.74571	2.74571	1.45718
Acute Phase Response Signaling	2.32	0.0592	0.816	SERPIND1	serpin family D member 1	Extracellular Space	other	0.000730228	0.000373821	up	2.96837	2.96837	1.56967
Pancreatic Adenocarcinoma Signaling	2.3	0.0678	0.707	HMOX1	heme oxygenase 1	Cytoplasm	enzyme	3.07978e-05	1.0198e-07	up	7.17615	7.17615	2.84321
Pancreatic Adenocarcinoma Signaling	2.3	0.0678	0.707	GAB1	GRB2 associated binding protein 1	Cytoplasm	kinase	0.000120758	1.28231e-05	down	2.38756	-2.38756	-1.25554
Pancreatic Adenocarcinoma Signaling	2.3	0.0678	0.707	CDKN1A	cyclin-dependent kinase inhibitor 1A	Nucleus	kinase	0.000177018	2.76906e-05	up	2.34183	2.34183	1.22764
Pancreatic Adenocarcinoma Signaling	2.3	0.0678	0.707	VEGFC	vascular endothelial growth factor C	Extracellular Space	growth factor	4.25833e-05	4.70028e-07	up	2.6596	2.6596	1.41121
Pancreatic Adenocarcinoma Signaling	2.3	0.0678	0.707	FGFR2	fibroblast growth factor receptor 2	Plasma Membrane	kinase	0.000292993	7.4204e-05	down	4.45302	-4.45302	-2.15478
Pancreatic Adenocarcinoma Signaling	2.3	0.0678	0.707	HBEGF	heparin binding EGF like growth factor	Extracellular Space	growth factor	0.000324605	9.06211e-05	up	2.92802	2.92802	1.54993
Pancreatic Adenocarcinoma Signaling	2.3	0.0678	0.707	STAT1	signal transducer and activator of transcription 1	Nucleus	transcription regulator	0.000127302	1.44319e-05	down	2.48387	-2.48387	-1.31259
Pancreatic Adenocarcinoma Signaling	2.3	0.0678	0.707	MMP9	matrix metallopeptidase 9	Extracellular Space	peptidase	0.000105861	9.4402e-06	up	5.58648	5.58648	2.48194
Ovarian Cancer Signaling	2.29	0.0625	NaN	FZD8	frizzled class receptor 8	Plasma Membrane	G-protein coupled receptor	0.000607384	0.000270472	up	2.43015	2.43015	1.28104
Ovarian Cancer Signaling	2.29	0.0625	NaN	MMP7	matrix metallopeptidase 7	Extracellular Space	peptidase	0.000324617	9.07357e-05	down	4.18581	-4.18581	-2.06551
Ovarian Cancer Signaling	2.29	0.0625	NaN	PRKAR2B	protein kinase cAMP-dependent type II regulatory subunit beta	Cytoplasm	kinase	0.000487765	0.000185126	down	3.53523	-3.53523	-1.8218
Ovarian Cancer Signaling	2.29	0.0625	NaN	GAB1	GRB2 associated binding protein 1	Cytoplasm	kinase	0.000120758	1.28231e-05	down	2.38756	-2.38756	-1.25554
Ovarian Cancer Signaling	2.29	0.0625	NaN	PTGS1	prostaglandin-endoperoxide synthase 1	Cytoplasm	enzyme	0.000467757	0.000172084	up	2.1589	2.1589	1.1103
Ovarian Cancer Signaling	2.29	0.0625	NaN	VEGFC	vascular endothelial growth factor C	Extracellular Space	growth factor	4.25833e-05	4.70028e-07	up	2.6596	2.6596	1.41121
Ovarian Cancer Signaling	2.29	0.0625	NaN	FGFR2	fibroblast growth factor receptor 2	Plasma Membrane	kinase	0.000292993	7.4204e-05	down	4.45302	-4.45302	-2.15478
Ovarian Cancer Signaling	2.29	0.0625	NaN	MMP9	matrix metallopeptidase 9	Extracellular Space	peptidase	0.000105861	9.4402e-06	up	5.58648	5.58648	2.48194
Ovarian Cancer Signaling	2.29	0.0625	NaN	WNT5A	Wnt family member 5A	Extracellular Space	cytokine	9.09658e-05	6.84293e-06	up	3.07702	3.07702	1.62154
GM-CSF Signaling	2.24	0.0822	-0.816	ETS1	ETS proto-oncogene 1, transcription factor	Nucleus	transcription regulator	0.000727446	0.000371116	up	2.14953	2.14953	1.10402
GM-CSF Signaling	2.24	0.0822	-0.816	GAB1	GRB2 associated binding protein 1	Cytoplasm	kinase	0.000120758	1.28231e-05	down	2.38756	-2.38756	-1.25554
GM-CSF Signaling	2.24	0.0822	-0.816	FGFR2	fibroblast growth factor receptor 2	Plasma Membrane	kinase	0.000292993	7.4204e-05	down	4.45302	-4.45302	-2.15478
GM-CSF Signaling	2.24	0.0822	-0.816	STAT1	signal transducer and activator of transcription 1	Nucleus	transcription regulator	0.000127302	1.44319e-05	down	2.48387	-2.48387	-1.31259
GM-CSF Signaling	2.24	0.0822	-0.816	CSF2	colony stimulating factor 2	Extracellular Space	cytokine	0.000181511	2.91396e-05	up	3.2134	3.2134	1.6841
GM-CSF Signaling	2.24	0.0822	-0.816	BCL2A1	BCL2 related protein A1	Cytoplasm	other	2.49541e-05	4.55887e-08	up	11.3611	11.3611	3.50603
Adenosine Nucleotides Degradation II	2.23	0.176	NaN	NT5E	5'-nucleotidase ecto	Plasma Membrane	phosphatase	8.09449e-05	5.25908e-06	up	3.37637	3.37637	1.75547
Adenosine Nucleotides Degradation II	2.23	0.176	NaN	XDH	xanthine dehydrogenase	Cytoplasm	enzyme	0.000240351	4.90388e-05	up	2.04405	2.04405	1.03143
Adenosine Nucleotides Degradation II	2.23	0.176	NaN	PNP	purine nucleoside phosphorylase	Nucleus	enzyme	0.000136714	1.65212e-05	up	2.01143	2.01143	1.00822
Relaxin Signaling	2.18	0.06	NaN	PRKAR2B	protein kinase cAMP-dependent type II regulatory subunit beta	Cytoplasm	kinase	0.000487765	0.000185126	down	3.53523	-3.53523	-1.8218
Relaxin Signaling	2.18	0.06	NaN	GAB1	GRB2 associated binding protein 1	Cytoplasm	kinase	0.000120758	1.28231e-05	down	2.38756	-2.38756	-1.25554
Relaxin Signaling	2.18	0.06	NaN	NFKBIE	NFKB inhibitor epsilon	Nucleus	transcription regulator	7.29755e-05	3.81911e-06	up	2.23963	2.23963	1.16326
Relaxin Signaling	2.18	0.06	NaN	FGFR2	fibroblast growth factor receptor 2	Plasma Membrane	kinase	0.000292993	7.4204e-05	down	4.45302	-4.45302	-2.15478
Relaxin Signaling	2.18	0.06	NaN	ADCY7	adenylate cyclase 7	Plasma Membrane	enzyme	0.000171656	2.62247e-05	down	2.13945	-2.13945	-1.09724
Relaxin Signaling	2.18	0.06	NaN	RAP1A	RAP1A, member of RAS oncogene family	Cytoplasm	enzyme	5.67199e-05	1.48871e-06	up	2.16819	2.16819	1.11649
Relaxin Signaling	2.18	0.06	NaN	MMP9	matrix metallopeptidase 9	Extracellular Space	peptidase	0.000105861	9.4402e-06	up	5.58648	5.58648	2.48194
Relaxin Signaling	2.18	0.06	NaN	GNG12	G protein subunit gamma 12	Plasma Membrane	enzyme	0.000320542	8.8399e-05	down	3.05299	-3.05299	-1.61022
Relaxin Signaling	2.18	0.06	NaN	GUCY1B3	guanylate cyclase 1, soluble, beta 3	Cytoplasm	enzyme	0.000294466	7.54152e-05	down	2.03253	-2.03253	-1.02328
Retinoate Biosynthesis I	2.18	0.118	NaN	DHRS3	dehydrogenase/reductase (SDR family) member 3	Cytoplasm	enzyme	5.50777e-05	1.38983e-06	down	2.98607	-2.98607	-1.57825
Retinoate Biosynthesis I	2.18	0.118	NaN	ALDH1A1	aldehyde dehydrogenase 1 family member A1	Cytoplasm	enzyme	4.38315e-05	5.73166e-07	down	3.45275	-3.45275	-1.78775
Retinoate Biosynthesis I	2.18	0.118	NaN	RDH10	retinol dehydrogenase 10 (all-trans)	Nucleus	enzyme	0.00180195	0.00137543	down	3.43556	-3.43556	-1.78055
Retinoate Biosynthesis I	2.18	0.118	NaN	AKR1B10	aldo-keto reductase family 1, member B10 (aldose reductase)	Cytoplasm	enzyme	0.000245566	5.14517e-05	down	2.36178	-2.36178	-1.23988
IL-15 Signaling	2.15	0.0789	NaN	CXCL8	C-X-C motif chemokine ligand 8	Extracellular Space	cytokine	4.70395e-05	7.41202e-07	up	6.01014	6.01014	2.5874
IL-15 Signaling	2.15	0.0789	NaN	GAB1	GRB2 associated binding protein 1	Cytoplasm	kinase	0.000120758	1.28231e-05	down	2.38756	-2.38756	-1.25554
IL-15 Signaling	2.15	0.0789	NaN	FGFR2	fibroblast growth factor receptor 2	Plasma Membrane	kinase	0.000292993	7.4204e-05	down	4.45302	-4.45302	-2.15478
IL-15 Signaling	2.15	0.0789	NaN	IL6	interleukin 6	Extracellular Space	cytokine	3.65159e-05	2.68298e-07	up	2.78882	2.78882	1.47965
IL-15 Signaling	2.15	0.0789	NaN	CSF2	colony stimulating factor 2	Extracellular Space	cytokine	0.000181511	2.91396e-05	up	3.2134	3.2134	1.6841
IL-15 Signaling	2.15	0.0789	NaN	TNF	tumor necrosis factor	Extracellular Space	cytokine	0.000291147	7.31026e-05	up	2.74571	2.74571	1.45718
Leukocyte Extravasation Signaling	2.11	0.0524	0.905	MMP7	matrix metallopeptidase 7	Extracellular Space	peptidase	0.000324617	9.07357e-05	down	4.18581	-4.18581	-2.06551
Leukocyte Extravasation Signaling	2.11	0.0524	0.905	ICAM1	intercellular adhesion molecule 1	Plasma Membrane	transmembrane receptor	4.25833e-05	4.82261e-07	up	4.88337	4.88337	2.28788
Leukocyte Extravasation Signaling	2.11	0.0524	0.905	GAB1	GRB2 associated binding protein 1	Cytoplasm	kinase	0.000120758	1.28231e-05	down	2.38756	-2.38756	-1.25554
Leukocyte Extravasation Signaling	2.11	0.0524	0.905	MMP14	matrix metallopeptidase 14	Extracellular Space	peptidase	5.71384e-05	1.58188e-06	up	2.21198	2.21198	1.14534
Leukocyte Extravasation Signaling	2.11	0.0524	0.905	VAV3	vav guanine nucleotide exchange factor 3	Extracellular Space	cytokine	9.63321e-05	7.8327e-06	down	8.02289	-8.02289	-3.00412
Leukocyte Extravasation Signaling	2.11	0.0524	0.905	NCF2	neutrophil cytosolic factor 2	Cytoplasm	enzyme	0.000241371	4.9582e-05	up	2.83754	2.83754	1.50464
Leukocyte Extravasation Signaling	2.11	0.0524	0.905	ITGA2	integrin subunit alpha 2	Plasma Membrane	transmembrane receptor	0.000106124	9.61516e-06	up	4.46447	4.46447	2.15849
Leukocyte Extravasation Signaling	2.11	0.0524	0.905	FGFR2	fibroblast growth factor receptor 2	Plasma Membrane	kinase	0.000292993	7.4204e-05	down	4.45302	-4.45302	-2.15478
Leukocyte Extravasation Signaling	2.11	0.0524	0.905	RAP1A	RAP1A, member of RAS oncogene family	Cytoplasm	enzyme	5.67199e-05	1.48871e-06	up	2.16819	2.16819	1.11649
Leukocyte Extravasation Signaling	2.11	0.0524	0.905	MMP9	matrix metallopeptidase 9	Extracellular Space	peptidase	0.000105861	9.4402e-06	up	5.58648	5.58648	2.48194
Leukocyte Extravasation Signaling	2.11	0.0524	0.905	MMP1	matrix metallopeptidase 1	Extracellular Space	peptidase	2.99009e-05	6.82824e-08	up	3.68258	3.68258	1.88072
Interferon Signaling	2.09	0.111	NaN	OAS1	2'-5'-oligoadenylate synthetase 1	Cytoplasm	enzyme	0.000831887	0.000462867	up	2.54895	2.54895	1.3499
Interferon Signaling	2.09	0.111	NaN	IRF9	interferon regulatory factor 9	Nucleus	transcription regulator	0.000133447	1.57552e-05	up	2.37847	2.37847	1.25003
Interferon Signaling	2.09	0.111	NaN	STAT1	signal transducer and activator of transcription 1	Nucleus	transcription regulator	0.000127302	1.44319e-05	down	2.48387	-2.48387	-1.31259
Interferon Signaling	2.09	0.111	NaN	TAP1	transporter 1, ATP-binding cassette, sub-family B (MDR/TAP)	Cytoplasm	transporter	4.66557e-05	7.245e-07	up	2.08292	2.08292	1.05861
Endothelin-1 Signaling	2.02	0.0535	1	HMOX1	heme oxygenase 1	Cytoplasm	enzyme	3.07978e-05	1.0198e-07	up	7.17615	7.17615	2.84321
Endothelin-1 Signaling	2.02	0.0535	1	PLA2G4A	phospholipase A2 group IVA	Cytoplasm	enzyme	0.000319621	8.78429e-05	up	2.0774	2.0774	1.05478
Endothelin-1 Signaling	2.02	0.0535	1	PLCB4	phospholipase C beta 4	Cytoplasm	enzyme	0.000577089	0.000248086	down	2.07794	-2.07794	-1.05515
Endothelin-1 Signaling	2.02	0.0535	1	GAB1	GRB2 associated binding protein 1	Cytoplasm	kinase	0.000120758	1.28231e-05	down	2.38756	-2.38756	-1.25554
Endothelin-1 Signaling	2.02	0.0535	1	PTGS1	prostaglandin-endoperoxide synthase 1	Cytoplasm	enzyme	0.000467757	0.000172084	up	2.1589	2.1589	1.1103
Endothelin-1 Signaling	2.02	0.0535	1	FGFR2	fibroblast growth factor receptor 2	Plasma Membrane	kinase	0.000292993	7.4204e-05	down	4.45302	-4.45302	-2.15478
Endothelin-1 Signaling	2.02	0.0535	1	ECE1	endothelin converting enzyme 1	Plasma Membrane	peptidase	0.000147862	1.93143e-05	up	2.01302	2.01302	1.00936
Endothelin-1 Signaling	2.02	0.0535	1	PTGER2	prostaglandin E receptor 2	Plasma Membrane	G-protein coupled receptor	0.000252601	5.47139e-05	down	2.17697	-2.17697	-1.12232
Endothelin-1 Signaling	2.02	0.0535	1	ADCY7	adenylate cyclase 7	Plasma Membrane	enzyme	0.000171656	2.62247e-05	down	2.13945	-2.13945	-1.09724
Endothelin-1 Signaling	2.02	0.0535	1	GUCY1B3	guanylate cyclase 1, soluble, beta 3	Cytoplasm	enzyme	0.000294466	7.54152e-05	down	2.03253	-2.03253	-1.02328
Purine Nucleotides Degradation II (Aerobic)	2.02	0.15	NaN	NT5E	5'-nucleotidase ecto	Plasma Membrane	phosphatase	8.09449e-05	5.25908e-06	up	3.37637	3.37637	1.75547
Purine Nucleotides Degradation II (Aerobic)	2.02	0.15	NaN	XDH	xanthine dehydrogenase	Cytoplasm	enzyme	0.000240351	4.90388e-05	up	2.04405	2.04405	1.03143
Purine Nucleotides Degradation II (Aerobic)	2.02	0.15	NaN	PNP	purine nucleoside phosphorylase	Nucleus	enzyme	0.000136714	1.65212e-05	up	2.01143	2.01143	1.00822
Hepatic Cholestasis	2.02	0.0566	NaN	CXCL8	C-X-C motif chemokine ligand 8	Extracellular Space	cytokine	4.70395e-05	7.41202e-07	up	6.01014	6.01014	2.5874
Hepatic Cholestasis	2.02	0.0566	NaN	LY96	lymphocyte antigen 96	Plasma Membrane	transmembrane receptor	0.000399174	0.000129442	up	2.09875	2.09875	1.06953
Hepatic Cholestasis	2.02	0.0566	NaN	PRKAR2B	protein kinase cAMP-dependent type II regulatory subunit beta	Cytoplasm	kinase	0.000487765	0.000185126	down	3.53523	-3.53523	-1.8218
Hepatic Cholestasis	2.02	0.0566	NaN	NFKBIE	NFKB inhibitor epsilon	Nucleus	transcription regulator	7.29755e-05	3.81911e-06	up	2.23963	2.23963	1.16326
Hepatic Cholestasis	2.02	0.0566	NaN	IL6	interleukin 6	Extracellular Space	cytokine	3.65159e-05	2.68298e-07	up	2.78882	2.78882	1.47965
Hepatic Cholestasis	2.02	0.0566	NaN	CSF2	colony stimulating factor 2	Extracellular Space	cytokine	0.000181511	2.91396e-05	up	3.2134	3.2134	1.6841
Hepatic Cholestasis	2.02	0.0566	NaN	ADCY7	adenylate cyclase 7	Plasma Membrane	enzyme	0.000171656	2.62247e-05	down	2.13945	-2.13945	-1.09724
Hepatic Cholestasis	2.02	0.0566	NaN	TNF	tumor necrosis factor	Extracellular Space	cytokine	0.000291147	7.31026e-05	up	2.74571	2.74571	1.45718
Hepatic Cholestasis	2.02	0.0566	NaN	IRAK2	interleukin 1 receptor associated kinase 2	Plasma Membrane	kinase	0.000118827	1.23196e-05	up	3.36683	3.36683	1.75139
MSP-RON Signaling Pathway	2	0.0847	NaN	TLR2	toll like receptor 2	Plasma Membrane	transmembrane receptor	8.09449e-05	5.23963e-06	up	4.16405	4.16405	2.05799
MSP-RON Signaling Pathway	2	0.0847	NaN	CCL2	C-C motif chemokine ligand 2	Extracellular Space	cytokine	5.71384e-05	1.64325e-06	up	4.18932	4.18932	2.06672
MSP-RON Signaling Pathway	2	0.0847	NaN	GAB1	GRB2 associated binding protein 1	Cytoplasm	kinase	0.000120758	1.28231e-05	down	2.38756	-2.38756	-1.25554
MSP-RON Signaling Pathway	2	0.0847	NaN	FGFR2	fibroblast growth factor receptor 2	Plasma Membrane	kinase	0.000292993	7.4204e-05	down	4.45302	-4.45302	-2.15478
MSP-RON Signaling Pathway	2	0.0847	NaN	TNF	tumor necrosis factor	Extracellular Space	cytokine	0.000291147	7.31026e-05	up	2.74571	2.74571	1.45718
Regulation of the Epithelial-Mesenchymal Transition Pathway	1.99	0.0529	NaN	ETS1	ETS proto-oncogene 1, transcription factor	Nucleus	transcription regulator	0.000727446	0.000371116	up	2.14953	2.14953	1.10402
Regulation of the Epithelial-Mesenchymal Transition Pathway	1.99	0.0529	NaN	FZD8	frizzled class receptor 8	Plasma Membrane	G-protein coupled receptor	0.000607384	0.000270472	up	2.43015	2.43015	1.28104
Regulation of the Epithelial-Mesenchymal Transition Pathway	1.99	0.0529	NaN	GAB1	GRB2 associated binding protein 1	Cytoplasm	kinase	0.000120758	1.28231e-05	down	2.38756	-2.38756	-1.25554
Regulation of the Epithelial-Mesenchymal Transition Pathway	1.99	0.0529	NaN	EGR1	early growth response 1	Nucleus	transcription regulator	0.000910266	0.000531525	down	2.02311	-2.02311	-1.01658
Regulation of the Epithelial-Mesenchymal Transition Pathway	1.99	0.0529	NaN	FGFR2	fibroblast growth factor receptor 2	Plasma Membrane	kinase	0.000292993	7.4204e-05	down	4.45302	-4.45302	-2.15478
Regulation of the Epithelial-Mesenchymal Transition Pathway	1.99	0.0529	NaN	MMP9	matrix metallopeptidase 9	Extracellular Space	peptidase	0.000105861	9.4402e-06	up	5.58648	5.58648	2.48194
Regulation of the Epithelial-Mesenchymal Transition Pathway	1.99	0.0529	NaN	HMGA2	high mobility group AT-hook 2	Nucleus	enzyme	7.36928e-05	3.96405e-06	up	2.57121	2.57121	1.36245
Regulation of the Epithelial-Mesenchymal Transition Pathway	1.99	0.0529	NaN	WNT5A	Wnt family member 5A	Extracellular Space	cytokine	9.09658e-05	6.84293e-06	up	3.07702	3.07702	1.62154
Regulation of the Epithelial-Mesenchymal Transition Pathway	1.99	0.0529	NaN	FGF1	fibroblast growth factor 1	Extracellular Space	growth factor	0.000689416	0.000339749	up	2.7327	2.7327	1.45033
Regulation of the Epithelial-Mesenchymal Transition Pathway	1.99	0.0529	NaN	FGF5	fibroblast growth factor 5	Extracellular Space	growth factor	3.65159e-05	2.83522e-07	up	3.22383	3.22383	1.68878
Inhibition of Matrix Metalloproteases	1.96	0.103	NaN	MMP7	matrix metallopeptidase 7	Extracellular Space	peptidase	0.000324617	9.07357e-05	down	4.18581	-4.18581	-2.06551
Inhibition of Matrix Metalloproteases	1.96	0.103	NaN	MMP14	matrix metallopeptidase 14	Extracellular Space	peptidase	5.71384e-05	1.58188e-06	up	2.21198	2.21198	1.14534
Inhibition of Matrix Metalloproteases	1.96	0.103	NaN	MMP9	matrix metallopeptidase 9	Extracellular Space	peptidase	0.000105861	9.4402e-06	up	5.58648	5.58648	2.48194
Inhibition of Matrix Metalloproteases	1.96	0.103	NaN	MMP1	matrix metallopeptidase 1	Extracellular Space	peptidase	2.99009e-05	6.82824e-08	up	3.68258	3.68258	1.88072
Gαs Signaling	1.95	0.0642	0	ADD3	adducin 3	Cytoplasm	other	4.76218e-05	8.21065e-07	down	2.36919	-2.36919	-1.24439
Gαs Signaling	1.95	0.0642	0	PRKAR2B	protein kinase cAMP-dependent type II regulatory subunit beta	Cytoplasm	kinase	0.000487765	0.000185126	down	3.53523	-3.53523	-1.8218
Gαs Signaling	1.95	0.0642	0	ADORA2B	adenosine A2b receptor	Plasma Membrane	G-protein coupled receptor	0.000155574	2.11387e-05	up	2.26916	2.26916	1.18216
Gαs Signaling	1.95	0.0642	0	PTGER2	prostaglandin E receptor 2	Plasma Membrane	G-protein coupled receptor	0.000252601	5.47139e-05	down	2.17697	-2.17697	-1.12232
Gαs Signaling	1.95	0.0642	0	ADCY7	adenylate cyclase 7	Plasma Membrane	enzyme	0.000171656	2.62247e-05	down	2.13945	-2.13945	-1.09724
Gαs Signaling	1.95	0.0642	0	RAP1A	RAP1A, member of RAS oncogene family	Cytoplasm	enzyme	5.67199e-05	1.48871e-06	up	2.16819	2.16819	1.11649
Gαs Signaling	1.95	0.0642	0	GNG12	G protein subunit gamma 12	Plasma Membrane	enzyme	0.000320542	8.8399e-05	down	3.05299	-3.05299	-1.61022
Role of NFAT in Cardiac Hypertrophy	1.95	0.0521	-1.667	RCAN1	regulator of calcineurin 1	Nucleus	transcription regulator	7.03519e-05	3.19708e-06	up	2.17179	2.17179	1.11888
Role of NFAT in Cardiac Hypertrophy	1.95	0.0521	-1.667	PLCB4	phospholipase C beta 4	Cytoplasm	enzyme	0.000577089	0.000248086	down	2.07794	-2.07794	-1.05515
Role of NFAT in Cardiac Hypertrophy	1.95	0.0521	-1.667	PRKAR2B	protein kinase cAMP-dependent type II regulatory subunit beta	Cytoplasm	kinase	0.000487765	0.000185126	down	3.53523	-3.53523	-1.8218
Role of NFAT in Cardiac Hypertrophy	1.95	0.0521	-1.667	GAB1	GRB2 associated binding protein 1	Cytoplasm	kinase	0.000120758	1.28231e-05	down	2.38756	-2.38756	-1.25554
Role of NFAT in Cardiac Hypertrophy	1.95	0.0521	-1.667	MEF2D	myocyte enhancer factor 2D	Nucleus	transcription regulator	0.000102885	8.85955e-06	up	2.07063	2.07063	1.05007
Role of NFAT in Cardiac Hypertrophy	1.95	0.0521	-1.667	MAP3K1	mitogen-activated protein kinase kinase kinase 1	Cytoplasm	kinase	0.000104164	9.08987e-06	down	2.99182	-2.99182	-1.58102
Role of NFAT in Cardiac Hypertrophy	1.95	0.0521	-1.667	FGFR2	fibroblast growth factor receptor 2	Plasma Membrane	kinase	0.000292993	7.4204e-05	down	4.45302	-4.45302	-2.15478
Role of NFAT in Cardiac Hypertrophy	1.95	0.0521	-1.667	IL6	interleukin 6	Extracellular Space	cytokine	3.65159e-05	2.68298e-07	up	2.78882	2.78882	1.47965
Role of NFAT in Cardiac Hypertrophy	1.95	0.0521	-1.667	ADCY7	adenylate cyclase 7	Plasma Membrane	enzyme	0.000171656	2.62247e-05	down	2.13945	-2.13945	-1.09724
Role of NFAT in Cardiac Hypertrophy	1.95	0.0521	-1.667	GNG12	G protein subunit gamma 12	Plasma Membrane	enzyme	0.000320542	8.8399e-05	down	3.05299	-3.05299	-1.61022
NRF2-mediated Oxidative Stress Response	1.93	0.0518	1	HMOX1	heme oxygenase 1	Cytoplasm	enzyme	3.07978e-05	1.0198e-07	up	7.17615	7.17615	2.84321
NRF2-mediated Oxidative Stress Response	1.93	0.0518	1	SOD2	superoxide dismutase 2, mitochondrial	Cytoplasm	enzyme	5.71384e-05	1.58904e-06	up	2.2088	2.2088	1.14326
NRF2-mediated Oxidative Stress Response	1.93	0.0518	1	GAB1	GRB2 associated binding protein 1	Cytoplasm	kinase	0.000120758	1.28231e-05	down	2.38756	-2.38756	-1.25554
NRF2-mediated Oxidative Stress Response	1.93	0.0518	1	GSTA4	glutathione S-transferase alpha 4	Cytoplasm	enzyme	0.000411532	0.000137256	down	2.86343	-2.86343	-1.51774
NRF2-mediated Oxidative Stress Response	1.93	0.0518	1	MAP3K1	mitogen-activated protein kinase kinase kinase 1	Cytoplasm	kinase	0.000104164	9.08987e-06	down	2.99182	-2.99182	-1.58102
NRF2-mediated Oxidative Stress Response	1.93	0.0518	1	FGFR2	fibroblast growth factor receptor 2	Plasma Membrane	kinase	0.000292993	7.4204e-05	down	4.45302	-4.45302	-2.15478
NRF2-mediated Oxidative Stress Response	1.93	0.0518	1	HERPUD1	homocysteine inducible ER protein with ubiquitin like domain 1	Cytoplasm	other	6.854e-05	2.87996e-06	up	3.03957	3.03957	1.60387
NRF2-mediated Oxidative Stress Response	1.93	0.0518	1	DNAJB6	DnaJ heat shock protein family (Hsp40) member B6	Nucleus	transcription regulator	4.56082e-05	6.29335e-07	up	2.6549	2.6549	1.40866
NRF2-mediated Oxidative Stress Response	1.93	0.0518	1	DNAJB9	DnaJ heat shock protein family (Hsp40) member B9	Nucleus	other	0.000310326	8.254e-05	up	2.37686	2.37686	1.24906
NRF2-mediated Oxidative Stress Response	1.93	0.0518	1	MAFF	v-maf avian musculoaponeurotic fibrosarcoma oncogene homolog F	Nucleus	transcription regulator	4.21674e-05	4.08421e-07	up	2.66875	2.66875	1.41617
Role of PKR in Interferon Induction and Antiviral Response	1.93	0.1	NaN	NFKBIE	NFKB inhibitor epsilon	Nucleus	transcription regulator	7.29755e-05	3.81911e-06	up	2.23963	2.23963	1.16326
Role of PKR in Interferon Induction and Antiviral Response	1.93	0.1	NaN	TAB2	TGF-beta activated kinase 1/MAP3K7 binding protein 2	Cytoplasm	other	7.07354e-05	3.22612e-06	down	2.16795	-2.16795	-1.11633
Role of PKR in Interferon Induction and Antiviral Response	1.93	0.1	NaN	STAT1	signal transducer and activator of transcription 1	Nucleus	transcription regulator	0.000127302	1.44319e-05	down	2.48387	-2.48387	-1.31259
Role of PKR in Interferon Induction and Antiviral Response	1.93	0.1	NaN	TNF	tumor necrosis factor	Extracellular Space	cytokine	0.000291147	7.31026e-05	up	2.74571	2.74571	1.45718
Neuroprotective Role of THOP1 in Alzheimer's Disease	1.93	0.1	NaN	PRKAR2B	protein kinase cAMP-dependent type II regulatory subunit beta	Cytoplasm	kinase	0.000487765	0.000185126	down	3.53523	-3.53523	-1.8218
Neuroprotective Role of THOP1 in Alzheimer's Disease	1.93	0.1	NaN	NFYA	nuclear transcription factor Y subunit alpha	Nucleus	transcription regulator	0.000230974	4.52045e-05	down	2.1825	-2.1825	-1.12598
Neuroprotective Role of THOP1 in Alzheimer's Disease	1.93	0.1	NaN	ECE1	endothelin converting enzyme 1	Plasma Membrane	peptidase	0.000147862	1.93143e-05	up	2.01302	2.01302	1.00936
Neuroprotective Role of THOP1 in Alzheimer's Disease	1.93	0.1	NaN	MMP9	matrix metallopeptidase 9	Extracellular Space	peptidase	0.000105861	9.4402e-06	up	5.58648	5.58648	2.48194
Nitric Oxide Signaling in the Cardiovascular System	1.87	0.0619	-1.633	PRKAR2B	protein kinase cAMP-dependent type II regulatory subunit beta	Cytoplasm	kinase	0.000487765	0.000185126	down	3.53523	-3.53523	-1.8218
Nitric Oxide Signaling in the Cardiovascular System	1.87	0.0619	-1.633	GAB1	GRB2 associated binding protein 1	Cytoplasm	kinase	0.000120758	1.28231e-05	down	2.38756	-2.38756	-1.25554
Nitric Oxide Signaling in the Cardiovascular System	1.87	0.0619	-1.633	PRKAA1	protein kinase AMP-activated catalytic subunit alpha 1	Cytoplasm	kinase	0.00048552	0.000183941	down	2.44451	-2.44451	-1.28954
Nitric Oxide Signaling in the Cardiovascular System	1.87	0.0619	-1.633	VEGFC	vascular endothelial growth factor C	Extracellular Space	growth factor	4.25833e-05	4.70028e-07	up	2.6596	2.6596	1.41121
Nitric Oxide Signaling in the Cardiovascular System	1.87	0.0619	-1.633	FGFR2	fibroblast growth factor receptor 2	Plasma Membrane	kinase	0.000292993	7.4204e-05	down	4.45302	-4.45302	-2.15478
Nitric Oxide Signaling in the Cardiovascular System	1.87	0.0619	-1.633	ARG2	arginase 2	Cytoplasm	enzyme	0.000291983	7.3746e-05	up	2.06061	2.06061	1.04307
Nitric Oxide Signaling in the Cardiovascular System	1.87	0.0619	-1.633	GUCY1B3	guanylate cyclase 1, soluble, beta 3	Cytoplasm	enzyme	0.000294466	7.54152e-05	down	2.03253	-2.03253	-1.02328
Altered T Cell and B Cell Signaling in Rheumatoid Arthritis	1.86	0.0682	NaN	TLR2	toll like receptor 2	Plasma Membrane	transmembrane receptor	8.09449e-05	5.23963e-06	up	4.16405	4.16405	2.05799
Altered T Cell and B Cell Signaling in Rheumatoid Arthritis	1.86	0.0682	NaN	CD40	CD40 molecule	Plasma Membrane	transmembrane receptor	9.69248e-05	8.01981e-06	up	2.53917	2.53917	1.34436
Altered T Cell and B Cell Signaling in Rheumatoid Arthritis	1.86	0.0682	NaN	LTB	lymphotoxin beta	Extracellular Space	cytokine	0.000325041	9.10768e-05	up	3.23391	3.23391	1.69328
Altered T Cell and B Cell Signaling in Rheumatoid Arthritis	1.86	0.0682	NaN	IL6	interleukin 6	Extracellular Space	cytokine	3.65159e-05	2.68298e-07	up	2.78882	2.78882	1.47965
Altered T Cell and B Cell Signaling in Rheumatoid Arthritis	1.86	0.0682	NaN	CSF2	colony stimulating factor 2	Extracellular Space	cytokine	0.000181511	2.91396e-05	up	3.2134	3.2134	1.6841
Altered T Cell and B Cell Signaling in Rheumatoid Arthritis	1.86	0.0682	NaN	TNF	tumor necrosis factor	Extracellular Space	cytokine	0.000291147	7.31026e-05	up	2.74571	2.74571	1.45718
Crosstalk between Dendritic Cells and Natural Killer Cells	1.83	0.0674	NaN	CD40	CD40 molecule	Plasma Membrane	transmembrane receptor	9.69248e-05	8.01981e-06	up	2.53917	2.53917	1.34436
Crosstalk between Dendritic Cells and Natural Killer Cells	1.83	0.0674	NaN	LTB	lymphotoxin beta	Extracellular Space	cytokine	0.000325041	9.10768e-05	up	3.23391	3.23391	1.69328
Crosstalk between Dendritic Cells and Natural Killer Cells	1.83	0.0674	NaN	CD83	CD83 molecule	Plasma Membrane	transmembrane receptor	4.38315e-05	5.49112e-07	up	3.66965	3.66965	1.87564
Crosstalk between Dendritic Cells and Natural Killer Cells	1.83	0.0674	NaN	IL6	interleukin 6	Extracellular Space	cytokine	3.65159e-05	2.68298e-07	up	2.78882	2.78882	1.47965
Crosstalk between Dendritic Cells and Natural Killer Cells	1.83	0.0674	NaN	CSF2	colony stimulating factor 2	Extracellular Space	cytokine	0.000181511	2.91396e-05	up	3.2134	3.2134	1.6841
Crosstalk between Dendritic Cells and Natural Killer Cells	1.83	0.0674	NaN	TNF	tumor necrosis factor	Extracellular Space	cytokine	0.000291147	7.31026e-05	up	2.74571	2.74571	1.45718
Role of RIG1-like Receptors in Antiviral Innate Immunity	1.82	0.093	NaN	IFIH1	interferon induced with helicase C domain 1	Nucleus	enzyme	6.05334e-05	2.0177e-06	up	2.86486	2.86486	1.51846
Role of RIG1-like Receptors in Antiviral Innate Immunity	1.82	0.093	NaN	NFKBIE	NFKB inhibitor epsilon	Nucleus	transcription regulator	7.29755e-05	3.81911e-06	up	2.23963	2.23963	1.16326
Role of RIG1-like Receptors in Antiviral Innate Immunity	1.82	0.093	NaN	DDX58	DEXD/H-box helicase 58	Cytoplasm	enzyme	7.88016e-05	4.63882e-06	up	2.39664	2.39664	1.26101
Role of RIG1-like Receptors in Antiviral Innate Immunity	1.82	0.093	NaN	MAVS	mitochondrial antiviral signaling protein	Cytoplasm	other	0.001397	0.000996787	down	2.47268	-2.47268	-1.30607
FGF Signaling	1.81	0.0667	0	GAB1	GRB2 associated binding protein 1	Cytoplasm	kinase	0.000120758	1.28231e-05	down	2.38756	-2.38756	-1.25554
FGF Signaling	1.81	0.0667	0	MAP3K1	mitogen-activated protein kinase kinase kinase 1	Cytoplasm	kinase	0.000104164	9.08987e-06	down	2.99182	-2.99182	-1.58102
FGF Signaling	1.81	0.0667	0	FGFR2	fibroblast growth factor receptor 2	Plasma Membrane	kinase	0.000292993	7.4204e-05	down	4.45302	-4.45302	-2.15478
FGF Signaling	1.81	0.0667	0	RPS6KA5	ribosomal protein S6 kinase A5	Nucleus	kinase	0.000896053	0.000519236	up	2.57033	2.57033	1.36195
FGF Signaling	1.81	0.0667	0	FGF1	fibroblast growth factor 1	Extracellular Space	growth factor	0.000689416	0.000339749	up	2.7327	2.7327	1.45033
FGF Signaling	1.81	0.0667	0	FGF5	fibroblast growth factor 5	Extracellular Space	growth factor	3.65159e-05	2.83522e-07	up	3.22383	3.22383	1.68878
CDP-diacylglycerol Biosynthesis I	1.8	0.125	NaN	ABHD5	abhydrolase domain containing 5	Cytoplasm	enzyme	0.000223981	4.29378e-05	down	2.45649	-2.45649	-1.2966
CDP-diacylglycerol Biosynthesis I	1.8	0.125	NaN	LCLAT1	lysocardiolipin acyltransferase 1	Cytoplasm	enzyme	0.000563238	0.000238177	down	2.21825	-2.21825	-1.14942
CDP-diacylglycerol Biosynthesis I	1.8	0.125	NaN	CRLS1	cardiolipin synthase 1	Cytoplasm	enzyme	9.24278e-05	7.1639e-06	down	2.05449	-2.05449	-1.03878
p38 MAPK Signaling	1.8	0.0598	1.134	PLA2G4A	phospholipase A2 group IVA	Cytoplasm	enzyme	0.000319621	8.78429e-05	up	2.0774	2.0774	1.05478
p38 MAPK Signaling	1.8	0.0598	1.134	MEF2D	myocyte enhancer factor 2D	Nucleus	transcription regulator	0.000102885	8.85955e-06	up	2.07063	2.07063	1.05007
p38 MAPK Signaling	1.8	0.0598	1.134	TAB2	TGF-beta activated kinase 1/MAP3K7 binding protein 2	Cytoplasm	other	7.07354e-05	3.22612e-06	down	2.16795	-2.16795	-1.11633
p38 MAPK Signaling	1.8	0.0598	1.134	RPS6KA5	ribosomal protein S6 kinase A5	Nucleus	kinase	0.000896053	0.000519236	up	2.57033	2.57033	1.36195
p38 MAPK Signaling	1.8	0.0598	1.134	STAT1	signal transducer and activator of transcription 1	Nucleus	transcription regulator	0.000127302	1.44319e-05	down	2.48387	-2.48387	-1.31259
p38 MAPK Signaling	1.8	0.0598	1.134	TNF	tumor necrosis factor	Extracellular Space	cytokine	0.000291147	7.31026e-05	up	2.74571	2.74571	1.45718
p38 MAPK Signaling	1.8	0.0598	1.134	IRAK2	interleukin 1 receptor associated kinase 2	Plasma Membrane	kinase	0.000118827	1.23196e-05	up	3.36683	3.36683	1.75139
Pathogenesis of Multiple Sclerosis	1.79	0.222	NaN	CXCL11	C-X-C motif chemokine ligand 11	Other	cytokine	0.000621227	0.000282085	up	2.52305	2.52305	1.33517
Pathogenesis of Multiple Sclerosis	1.79	0.222	NaN	CCL5	C-C motif chemokine ligand 5	Extracellular Space	cytokine	0.000244253	5.08419e-05	up	3.69923	3.69923	1.88723
Prostanoid Biosynthesis	1.79	0.222	NaN	PTGIS	prostaglandin I2 (prostacyclin) synthase	Cytoplasm	enzyme	0.00012705	1.42352e-05	down	2.49963	-2.49963	-1.32171
Prostanoid Biosynthesis	1.79	0.222	NaN	PTGS1	prostaglandin-endoperoxide synthase 1	Cytoplasm	enzyme	0.000467757	0.000172084	up	2.1589	2.1589	1.1103
Ephrin Receptor Signaling	1.79	0.0517	1	EPHB1	EPH receptor B1	Plasma Membrane	kinase	0.0001348	1.60689e-05	up	2.30644	2.30644	1.20567
Ephrin Receptor Signaling	1.79	0.0517	1	RGS3	regulator of G-protein signaling 3	Nucleus	other	0.00146999	0.00106616	up	2.21155	2.21155	1.14506
Ephrin Receptor Signaling	1.79	0.0517	1	PTPN13	protein tyrosine phosphatase, non-receptor type 13	Cytoplasm	phosphatase	0.00056923	0.000241718	down	2.30453	-2.30453	-1.20447
Ephrin Receptor Signaling	1.79	0.0517	1	ITGA2	integrin subunit alpha 2	Plasma Membrane	transmembrane receptor	0.000106124	9.61516e-06	up	4.46447	4.46447	2.15849
Ephrin Receptor Signaling	1.79	0.0517	1	VEGFC	vascular endothelial growth factor C	Extracellular Space	growth factor	4.25833e-05	4.70028e-07	up	2.6596	2.6596	1.41121
Ephrin Receptor Signaling	1.79	0.0517	1	MAP4K4	mitogen-activated protein kinase kinase kinase kinase 4	Cytoplasm	kinase	0.000136555	1.64327e-05	up	2.15776	2.15776	1.10954
Ephrin Receptor Signaling	1.79	0.0517	1	RAP1A	RAP1A, member of RAS oncogene family	Cytoplasm	enzyme	5.67199e-05	1.48871e-06	up	2.16819	2.16819	1.11649
Ephrin Receptor Signaling	1.79	0.0517	1	GNG12	G protein subunit gamma 12	Plasma Membrane	enzyme	0.000320542	8.8399e-05	down	3.05299	-3.05299	-1.61022
Ephrin Receptor Signaling	1.79	0.0517	1	FGF1	fibroblast growth factor 1	Extracellular Space	growth factor	0.000689416	0.000339749	up	2.7327	2.7327	1.45033
iNOS Signaling	1.78	0.0909	NaN	LY96	lymphocyte antigen 96	Plasma Membrane	transmembrane receptor	0.000399174	0.000129442	up	2.09875	2.09875	1.06953
iNOS Signaling	1.78	0.0909	NaN	NFKBIE	NFKB inhibitor epsilon	Nucleus	transcription regulator	7.29755e-05	3.81911e-06	up	2.23963	2.23963	1.16326
iNOS Signaling	1.78	0.0909	NaN	STAT1	signal transducer and activator of transcription 1	Nucleus	transcription regulator	0.000127302	1.44319e-05	down	2.48387	-2.48387	-1.31259
iNOS Signaling	1.78	0.0909	NaN	IRAK2	interleukin 1 receptor associated kinase 2	Plasma Membrane	kinase	0.000118827	1.23196e-05	up	3.36683	3.36683	1.75139
Lymphotoxin β Receptor Signaling	1.77	0.0746	0.447	GAB1	GRB2 associated binding protein 1	Cytoplasm	kinase	0.000120758	1.28231e-05	down	2.38756	-2.38756	-1.25554
Lymphotoxin β Receptor Signaling	1.77	0.0746	0.447	LTB	lymphotoxin beta	Extracellular Space	cytokine	0.000325041	9.10768e-05	up	3.23391	3.23391	1.69328
Lymphotoxin β Receptor Signaling	1.77	0.0746	0.447	FGFR2	fibroblast growth factor receptor 2	Plasma Membrane	kinase	0.000292993	7.4204e-05	down	4.45302	-4.45302	-2.15478
Lymphotoxin β Receptor Signaling	1.77	0.0746	0.447	CXCL1	C-X-C motif chemokine ligand 1	Extracellular Space	cytokine	7.2018e-05	3.46222e-06	up	2.66667	2.66667	1.41504
Lymphotoxin β Receptor Signaling	1.77	0.0746	0.447	TRAF1	TNF receptor associated factor 1	Cytoplasm	other	7.2424e-05	3.63029e-06	up	5.55985	5.55985	2.47505
Eicosanoid Signaling	1.77	0.0746	NaN	PTGIS	prostaglandin I2 (prostacyclin) synthase	Cytoplasm	enzyme	0.00012705	1.42352e-05	down	2.49963	-2.49963	-1.32171
Eicosanoid Signaling	1.77	0.0746	NaN	PLA2G4A	phospholipase A2 group IVA	Cytoplasm	enzyme	0.000319621	8.78429e-05	up	2.0774	2.0774	1.05478
Eicosanoid Signaling	1.77	0.0746	NaN	PTGS1	prostaglandin-endoperoxide synthase 1	Cytoplasm	enzyme	0.000467757	0.000172084	up	2.1589	2.1589	1.1103
Eicosanoid Signaling	1.77	0.0746	NaN	ALOX5AP	arachidonate 5-lipoxygenase activating protein	Plasma Membrane	other	0.000451005	0.00016139	up	2.27085	2.27085	1.18323
Eicosanoid Signaling	1.77	0.0746	NaN	PTGER2	prostaglandin E receptor 2	Plasma Membrane	G-protein coupled receptor	0.000252601	5.47139e-05	down	2.17697	-2.17697	-1.12232
Cardiac Hypertrophy Signaling	1.77	0.0468	-1.897	ADSS	adenylosuccinate synthase	Cytoplasm	enzyme	9.31449e-05	7.37034e-06	down	3.2606	-3.2606	-1.70514
Cardiac Hypertrophy Signaling	1.77	0.0468	-1.897	PLCB4	phospholipase C beta 4	Cytoplasm	enzyme	0.000577089	0.000248086	down	2.07794	-2.07794	-1.05515
Cardiac Hypertrophy Signaling	1.77	0.0468	-1.897	PRKAR2B	protein kinase cAMP-dependent type II regulatory subunit beta	Cytoplasm	kinase	0.000487765	0.000185126	down	3.53523	-3.53523	-1.8218
Cardiac Hypertrophy Signaling	1.77	0.0468	-1.897	GAB1	GRB2 associated binding protein 1	Cytoplasm	kinase	0.000120758	1.28231e-05	down	2.38756	-2.38756	-1.25554
Cardiac Hypertrophy Signaling	1.77	0.0468	-1.897	RHOB	ras homolog family member B	Cytoplasm	enzyme	6.81397e-05	2.79312e-06	down	3.93244	-3.93244	-1.97543
Cardiac Hypertrophy Signaling	1.77	0.0468	-1.897	MEF2D	myocyte enhancer factor 2D	Nucleus	transcription regulator	0.000102885	8.85955e-06	up	2.07063	2.07063	1.05007
Cardiac Hypertrophy Signaling	1.77	0.0468	-1.897	MAP3K1	mitogen-activated protein kinase kinase kinase 1	Cytoplasm	kinase	0.000104164	9.08987e-06	down	2.99182	-2.99182	-1.58102
Cardiac Hypertrophy Signaling	1.77	0.0468	-1.897	FGFR2	fibroblast growth factor receptor 2	Plasma Membrane	kinase	0.000292993	7.4204e-05	down	4.45302	-4.45302	-2.15478
Cardiac Hypertrophy Signaling	1.77	0.0468	-1.897	IL6	interleukin 6	Extracellular Space	cytokine	3.65159e-05	2.68298e-07	up	2.78882	2.78882	1.47965
Cardiac Hypertrophy Signaling	1.77	0.0468	-1.897	ADCY7	adenylate cyclase 7	Plasma Membrane	enzyme	0.000171656	2.62247e-05	down	2.13945	-2.13945	-1.09724
Cardiac Hypertrophy Signaling	1.77	0.0468	-1.897	GNG12	G protein subunit gamma 12	Plasma Membrane	enzyme	0.000320542	8.8399e-05	down	3.05299	-3.05299	-1.61022
IL-9 Signaling	1.75	0.0889	-1	GAB1	GRB2 associated binding protein 1	Cytoplasm	kinase	0.000120758	1.28231e-05	down	2.38756	-2.38756	-1.25554
IL-9 Signaling	1.75	0.0889	-1	FGFR2	fibroblast growth factor receptor 2	Plasma Membrane	kinase	0.000292993	7.4204e-05	down	4.45302	-4.45302	-2.15478
IL-9 Signaling	1.75	0.0889	-1	STAT1	signal transducer and activator of transcription 1	Nucleus	transcription regulator	0.000127302	1.44319e-05	down	2.48387	-2.48387	-1.31259
IL-9 Signaling	1.75	0.0889	-1	TNF	tumor necrosis factor	Extracellular Space	cytokine	0.000291147	7.31026e-05	up	2.74571	2.74571	1.45718
Ceramide Signaling	1.75	0.0645	0	GAB1	GRB2 associated binding protein 1	Cytoplasm	kinase	0.000120758	1.28231e-05	down	2.38756	-2.38756	-1.25554
Ceramide Signaling	1.75	0.0645	0	MAP3K1	mitogen-activated protein kinase kinase kinase 1	Cytoplasm	kinase	0.000104164	9.08987e-06	down	2.99182	-2.99182	-1.58102
Ceramide Signaling	1.75	0.0645	0	S1PR1	sphingosine-1-phosphate receptor 1	Plasma Membrane	G-protein coupled receptor	1.48349e-06	3.38774e-10	down	7.79723	-7.79723	-2.96296
Ceramide Signaling	1.75	0.0645	0	FGFR2	fibroblast growth factor receptor 2	Plasma Membrane	kinase	0.000292993	7.4204e-05	down	4.45302	-4.45302	-2.15478
Ceramide Signaling	1.75	0.0645	0	PPP2R1B	protein phosphatase 2 regulatory subunit A, beta	Plasma Membrane	phosphatase	0.00054298	0.000223565	down	3.20601	-3.20601	-1.68078
Ceramide Signaling	1.75	0.0645	0	TNF	tumor necrosis factor	Extracellular Space	cytokine	0.000291147	7.31026e-05	up	2.74571	2.74571	1.45718
G-Protein Coupled Receptor Signaling	1.73	0.0444	NaN	PLCB4	phospholipase C beta 4	Cytoplasm	enzyme	0.000577089	0.000248086	down	2.07794	-2.07794	-1.05515
G-Protein Coupled Receptor Signaling	1.73	0.0444	NaN	PRKAR2B	protein kinase cAMP-dependent type II regulatory subunit beta	Cytoplasm	kinase	0.000487765	0.000185126	down	3.53523	-3.53523	-1.8218
G-Protein Coupled Receptor Signaling	1.73	0.0444	NaN	GAB1	GRB2 associated binding protein 1	Cytoplasm	kinase	0.000120758	1.28231e-05	down	2.38756	-2.38756	-1.25554
G-Protein Coupled Receptor Signaling	1.73	0.0444	NaN	DUSP6	dual specificity phosphatase 6	Cytoplasm	phosphatase	4.05507e-05	3.60207e-07	up	4.36083	4.36083	2.1246
G-Protein Coupled Receptor Signaling	1.73	0.0444	NaN	NFKBIE	NFKB inhibitor epsilon	Nucleus	transcription regulator	7.29755e-05	3.81911e-06	up	2.23963	2.23963	1.16326
G-Protein Coupled Receptor Signaling	1.73	0.0444	NaN	S1PR1	sphingosine-1-phosphate receptor 1	Plasma Membrane	G-protein coupled receptor	1.48349e-06	3.38774e-10	down	7.79723	-7.79723	-2.96296
G-Protein Coupled Receptor Signaling	1.73	0.0444	NaN	RGS4	regulator of G-protein signaling 4	Cytoplasm	other	4.9534e-05	9.97018e-07	up	2.89909	2.89909	1.5356
G-Protein Coupled Receptor Signaling	1.73	0.0444	NaN	FGFR2	fibroblast growth factor receptor 2	Plasma Membrane	kinase	0.000292993	7.4204e-05	down	4.45302	-4.45302	-2.15478
G-Protein Coupled Receptor Signaling	1.73	0.0444	NaN	ADORA2B	adenosine A2b receptor	Plasma Membrane	G-protein coupled receptor	0.000155574	2.11387e-05	up	2.26916	2.26916	1.18216
G-Protein Coupled Receptor Signaling	1.73	0.0444	NaN	PTGER2	prostaglandin E receptor 2	Plasma Membrane	G-protein coupled receptor	0.000252601	5.47139e-05	down	2.17697	-2.17697	-1.12232
G-Protein Coupled Receptor Signaling	1.73	0.0444	NaN	ADCY7	adenylate cyclase 7	Plasma Membrane	enzyme	0.000171656	2.62247e-05	down	2.13945	-2.13945	-1.09724
G-Protein Coupled Receptor Signaling	1.73	0.0444	NaN	RAP1A	RAP1A, member of RAS oncogene family	Cytoplasm	enzyme	5.67199e-05	1.48871e-06	up	2.16819	2.16819	1.11649
Phosphatidylglycerol Biosynthesis II (Non-plastidic)	1.71	0.115	NaN	ABHD5	abhydrolase domain containing 5	Cytoplasm	enzyme	0.000223981	4.29378e-05	down	2.45649	-2.45649	-1.2966
Phosphatidylglycerol Biosynthesis II (Non-plastidic)	1.71	0.115	NaN	LCLAT1	lysocardiolipin acyltransferase 1	Cytoplasm	enzyme	0.000563238	0.000238177	down	2.21825	-2.21825	-1.14942
Phosphatidylglycerol Biosynthesis II (Non-plastidic)	1.71	0.115	NaN	CRLS1	cardiolipin synthase 1	Cytoplasm	enzyme	9.24278e-05	7.1639e-06	down	2.05449	-2.05449	-1.03878
Melanocyte Development and Pigmentation Signaling	1.71	0.0632	-1.633	KITLG	KIT ligand	Extracellular Space	growth factor	3.70634e-05	2.92673e-07	down	2.80656	-2.80656	-1.4888
Melanocyte Development and Pigmentation Signaling	1.71	0.0632	-1.633	PRKAR2B	protein kinase cAMP-dependent type II regulatory subunit beta	Cytoplasm	kinase	0.000487765	0.000185126	down	3.53523	-3.53523	-1.8218
Melanocyte Development and Pigmentation Signaling	1.71	0.0632	-1.633	GAB1	GRB2 associated binding protein 1	Cytoplasm	kinase	0.000120758	1.28231e-05	down	2.38756	-2.38756	-1.25554
Melanocyte Development and Pigmentation Signaling	1.71	0.0632	-1.633	FGFR2	fibroblast growth factor receptor 2	Plasma Membrane	kinase	0.000292993	7.4204e-05	down	4.45302	-4.45302	-2.15478
Melanocyte Development and Pigmentation Signaling	1.71	0.0632	-1.633	RPS6KA5	ribosomal protein S6 kinase A5	Nucleus	kinase	0.000896053	0.000519236	up	2.57033	2.57033	1.36195
Melanocyte Development and Pigmentation Signaling	1.71	0.0632	-1.633	ADCY7	adenylate cyclase 7	Plasma Membrane	enzyme	0.000171656	2.62247e-05	down	2.13945	-2.13945	-1.09724
Hematopoiesis from Pluripotent Stem Cells	1.69	0.0851	NaN	KITLG	KIT ligand	Extracellular Space	growth factor	3.70634e-05	2.92673e-07	down	2.80656	-2.80656	-1.4888
Hematopoiesis from Pluripotent Stem Cells	1.69	0.0851	NaN	CXCL8	C-X-C motif chemokine ligand 8	Extracellular Space	cytokine	4.70395e-05	7.41202e-07	up	6.01014	6.01014	2.5874
Hematopoiesis from Pluripotent Stem Cells	1.69	0.0851	NaN	IL6	interleukin 6	Extracellular Space	cytokine	3.65159e-05	2.68298e-07	up	2.78882	2.78882	1.47965
Hematopoiesis from Pluripotent Stem Cells	1.69	0.0851	NaN	CSF2	colony stimulating factor 2	Extracellular Space	cytokine	0.000181511	2.91396e-05	up	3.2134	3.2134	1.6841
Molecular Mechanisms of Cancer	1.67	0.0401	NaN	NFKBIE	NFKB inhibitor epsilon	Nucleus	transcription regulator	7.29755e-05	3.81911e-06	up	2.23963	2.23963	1.16326
Molecular Mechanisms of Cancer	1.67	0.0401	NaN	ITGA2	integrin subunit alpha 2	Plasma Membrane	transmembrane receptor	0.000106124	9.61516e-06	up	4.46447	4.46447	2.15849
Molecular Mechanisms of Cancer	1.67	0.0401	NaN	TAB2	TGF-beta activated kinase 1/MAP3K7 binding protein 2	Cytoplasm	other	7.07354e-05	3.22612e-06	down	2.16795	-2.16795	-1.11633
Molecular Mechanisms of Cancer	1.67	0.0401	NaN	PTCH1	patched 1	Plasma Membrane	transmembrane receptor	0.000788746	0.000423282	down	2.08064	-2.08064	-1.05703
Molecular Mechanisms of Cancer	1.67	0.0401	NaN	FGFR2	fibroblast growth factor receptor 2	Plasma Membrane	kinase	0.000292993	7.4204e-05	down	4.45302	-4.45302	-2.15478
Molecular Mechanisms of Cancer	1.67	0.0401	NaN	RAP1A	RAP1A, member of RAS oncogene family	Cytoplasm	enzyme	5.67199e-05	1.48871e-06	up	2.16819	2.16819	1.11649
Molecular Mechanisms of Cancer	1.67	0.0401	NaN	FZD8	frizzled class receptor 8	Plasma Membrane	G-protein coupled receptor	0.000607384	0.000270472	up	2.43015	2.43015	1.28104
Molecular Mechanisms of Cancer	1.67	0.0401	NaN	PLCB4	phospholipase C beta 4	Cytoplasm	enzyme	0.000577089	0.000248086	down	2.07794	-2.07794	-1.05515
Molecular Mechanisms of Cancer	1.67	0.0401	NaN	PRKAR2B	protein kinase cAMP-dependent type II regulatory subunit beta	Cytoplasm	kinase	0.000487765	0.000185126	down	3.53523	-3.53523	-1.8218
Molecular Mechanisms of Cancer	1.67	0.0401	NaN	RHOB	ras homolog family member B	Cytoplasm	enzyme	6.81397e-05	2.79312e-06	down	3.93244	-3.93244	-1.97543
Molecular Mechanisms of Cancer	1.67	0.0401	NaN	GAB1	GRB2 associated binding protein 1	Cytoplasm	kinase	0.000120758	1.28231e-05	down	2.38756	-2.38756	-1.25554
Molecular Mechanisms of Cancer	1.67	0.0401	NaN	CDKN1A	cyclin-dependent kinase inhibitor 1A	Nucleus	kinase	0.000177018	2.76906e-05	up	2.34183	2.34183	1.22764
Molecular Mechanisms of Cancer	1.67	0.0401	NaN	HIPK2	homeodomain interacting protein kinase 2	Nucleus	kinase	4.76218e-05	8.20133e-07	down	3.90758	-3.90758	-1.96627
Molecular Mechanisms of Cancer	1.67	0.0401	NaN	ADCY7	adenylate cyclase 7	Plasma Membrane	enzyme	0.000171656	2.62247e-05	down	2.13945	-2.13945	-1.09724
Molecular Mechanisms of Cancer	1.67	0.0401	NaN	WNT5A	Wnt family member 5A	Extracellular Space	cytokine	9.09658e-05	6.84293e-06	up	3.07702	3.07702	1.62154
IL-15 Production	1.66	0.111	NaN	TWF1	twinfilin actin binding protein 1	Cytoplasm	kinase	4.9534e-05	9.45398e-07	down	3.5115	-3.5115	-1.81209
IL-15 Production	1.66	0.111	NaN	IL6	interleukin 6	Extracellular Space	cytokine	3.65159e-05	2.68298e-07	up	2.78882	2.78882	1.47965
IL-15 Production	1.66	0.111	NaN	STAT1	signal transducer and activator of transcription 1	Nucleus	transcription regulator	0.000127302	1.44319e-05	down	2.48387	-2.48387	-1.31259
Xanthine and Xanthosine Salvage	1.65	1	NaN	PNP	purine nucleoside phosphorylase	Nucleus	enzyme	0.000136714	1.65212e-05	up	2.01143	2.01143	1.00822
eNOS Signaling	1.63	0.0516	-1.134	PRKAR2B	protein kinase cAMP-dependent type II regulatory subunit beta	Cytoplasm	kinase	0.000487765	0.000185126	down	3.53523	-3.53523	-1.8218
eNOS Signaling	1.63	0.0516	-1.134	GAB1	GRB2 associated binding protein 1	Cytoplasm	kinase	0.000120758	1.28231e-05	down	2.38756	-2.38756	-1.25554
eNOS Signaling	1.63	0.0516	-1.134	HSPA9	heat shock protein family A (Hsp70) member 9	Cytoplasm	other	5.12481e-05	1.15744e-06	down	2.64295	-2.64295	-1.40215
eNOS Signaling	1.63	0.0516	-1.134	PRKAA1	protein kinase AMP-activated catalytic subunit alpha 1	Cytoplasm	kinase	0.00048552	0.000183941	down	2.44451	-2.44451	-1.28954
eNOS Signaling	1.63	0.0516	-1.134	VEGFC	vascular endothelial growth factor C	Extracellular Space	growth factor	4.25833e-05	4.70028e-07	up	2.6596	2.6596	1.41121
eNOS Signaling	1.63	0.0516	-1.134	FGFR2	fibroblast growth factor receptor 2	Plasma Membrane	kinase	0.000292993	7.4204e-05	down	4.45302	-4.45302	-2.15478
eNOS Signaling	1.63	0.0516	-1.134	ADCY7	adenylate cyclase 7	Plasma Membrane	enzyme	0.000171656	2.62247e-05	down	2.13945	-2.13945	-1.09724
eNOS Signaling	1.63	0.0516	-1.134	GUCY1B3	guanylate cyclase 1, soluble, beta 3	Cytoplasm	enzyme	0.000294466	7.54152e-05	down	2.03253	-2.03253	-1.02328
B Cell Receptor Signaling	1.63	0.0486	-1	ETS1	ETS proto-oncogene 1, transcription factor	Nucleus	transcription regulator	0.000727446	0.000371116	up	2.14953	2.14953	1.10402
B Cell Receptor Signaling	1.63	0.0486	-1	GAB1	GRB2 associated binding protein 1	Cytoplasm	kinase	0.000120758	1.28231e-05	down	2.38756	-2.38756	-1.25554
B Cell Receptor Signaling	1.63	0.0486	-1	VAV3	vav guanine nucleotide exchange factor 3	Extracellular Space	cytokine	9.63321e-05	7.8327e-06	down	8.02289	-8.02289	-3.00412
B Cell Receptor Signaling	1.63	0.0486	-1	EGR1	early growth response 1	Nucleus	transcription regulator	0.000910266	0.000531525	down	2.02311	-2.02311	-1.01658
B Cell Receptor Signaling	1.63	0.0486	-1	NFKBIE	NFKB inhibitor epsilon	Nucleus	transcription regulator	7.29755e-05	3.81911e-06	up	2.23963	2.23963	1.16326
B Cell Receptor Signaling	1.63	0.0486	-1	MAP3K1	mitogen-activated protein kinase kinase kinase 1	Cytoplasm	kinase	0.000104164	9.08987e-06	down	2.99182	-2.99182	-1.58102
B Cell Receptor Signaling	1.63	0.0486	-1	FGFR2	fibroblast growth factor receptor 2	Plasma Membrane	kinase	0.000292993	7.4204e-05	down	4.45302	-4.45302	-2.15478
B Cell Receptor Signaling	1.63	0.0486	-1	BCL2A1	BCL2 related protein A1	Cytoplasm	other	2.49541e-05	4.55887e-08	up	11.3611	11.3611	3.50603
B Cell Receptor Signaling	1.63	0.0486	-1	RAP1A	RAP1A, member of RAS oncogene family	Cytoplasm	enzyme	5.67199e-05	1.48871e-06	up	2.16819	2.16819	1.11649
TNFR1 Signaling	1.63	0.0816	NaN	NFKBIE	NFKB inhibitor epsilon	Nucleus	transcription regulator	7.29755e-05	3.81911e-06	up	2.23963	2.23963	1.16326
TNFR1 Signaling	1.63	0.0816	NaN	MAP3K1	mitogen-activated protein kinase kinase kinase 1	Cytoplasm	kinase	0.000104164	9.08987e-06	down	2.99182	-2.99182	-1.58102
TNFR1 Signaling	1.63	0.0816	NaN	TNFAIP3	TNF alpha induced protein 3	Nucleus	enzyme	4.63841e-05	6.73483e-07	up	3.2656	3.2656	1.70735
TNFR1 Signaling	1.63	0.0816	NaN	TNF	tumor necrosis factor	Extracellular Space	cytokine	0.000291147	7.31026e-05	up	2.74571	2.74571	1.45718
IL-6 Signaling	1.62	0.0551	1.134	CXCL8	C-X-C motif chemokine ligand 8	Extracellular Space	cytokine	4.70395e-05	7.41202e-07	up	6.01014	6.01014	2.5874
IL-6 Signaling	1.62	0.0551	1.134	GAB1	GRB2 associated binding protein 1	Cytoplasm	kinase	0.000120758	1.28231e-05	down	2.38756	-2.38756	-1.25554
IL-6 Signaling	1.62	0.0551	1.134	NFKBIE	NFKB inhibitor epsilon	Nucleus	transcription regulator	7.29755e-05	3.81911e-06	up	2.23963	2.23963	1.16326
IL-6 Signaling	1.62	0.0551	1.134	FGFR2	fibroblast growth factor receptor 2	Plasma Membrane	kinase	0.000292993	7.4204e-05	down	4.45302	-4.45302	-2.15478
IL-6 Signaling	1.62	0.0551	1.134	IL6	interleukin 6	Extracellular Space	cytokine	3.65159e-05	2.68298e-07	up	2.78882	2.78882	1.47965
IL-6 Signaling	1.62	0.0551	1.134	TNF	tumor necrosis factor	Extracellular Space	cytokine	0.000291147	7.31026e-05	up	2.74571	2.74571	1.45718
IL-6 Signaling	1.62	0.0551	1.134	MAP4K4	mitogen-activated protein kinase kinase kinase kinase 4	Cytoplasm	kinase	0.000136555	1.64327e-05	up	2.15776	2.15776	1.10954
Antiproliferative Role of Somatostatin Receptor 2	1.58	0.0667	NaN	GAB1	GRB2 associated binding protein 1	Cytoplasm	kinase	0.000120758	1.28231e-05	down	2.38756	-2.38756	-1.25554
Antiproliferative Role of Somatostatin Receptor 2	1.58	0.0667	NaN	CDKN1A	cyclin-dependent kinase inhibitor 1A	Nucleus	kinase	0.000177018	2.76906e-05	up	2.34183	2.34183	1.22764
Antiproliferative Role of Somatostatin Receptor 2	1.58	0.0667	NaN	FGFR2	fibroblast growth factor receptor 2	Plasma Membrane	kinase	0.000292993	7.4204e-05	down	4.45302	-4.45302	-2.15478
Antiproliferative Role of Somatostatin Receptor 2	1.58	0.0667	NaN	GNG12	G protein subunit gamma 12	Plasma Membrane	enzyme	0.000320542	8.8399e-05	down	3.05299	-3.05299	-1.61022
Antiproliferative Role of Somatostatin Receptor 2	1.58	0.0667	NaN	GUCY1B3	guanylate cyclase 1, soluble, beta 3	Cytoplasm	enzyme	0.000294466	7.54152e-05	down	2.03253	-2.03253	-1.02328
Gα12/13 Signaling	1.57	0.0538	-0.816	GAB1	GRB2 associated binding protein 1	Cytoplasm	kinase	0.000120758	1.28231e-05	down	2.38756	-2.38756	-1.25554
Gα12/13 Signaling	1.57	0.0538	-0.816	VAV3	vav guanine nucleotide exchange factor 3	Extracellular Space	cytokine	9.63321e-05	7.8327e-06	down	8.02289	-8.02289	-3.00412
Gα12/13 Signaling	1.57	0.0538	-0.816	NFKBIE	NFKB inhibitor epsilon	Nucleus	transcription regulator	7.29755e-05	3.81911e-06	up	2.23963	2.23963	1.16326
Gα12/13 Signaling	1.57	0.0538	-0.816	MEF2D	myocyte enhancer factor 2D	Nucleus	transcription regulator	0.000102885	8.85955e-06	up	2.07063	2.07063	1.05007
Gα12/13 Signaling	1.57	0.0538	-0.816	MAP3K1	mitogen-activated protein kinase kinase kinase 1	Cytoplasm	kinase	0.000104164	9.08987e-06	down	2.99182	-2.99182	-1.58102
Gα12/13 Signaling	1.57	0.0538	-0.816	CDH6	cadherin 6	Plasma Membrane	other	5.28114e-05	1.29647e-06	down	2.96946	-2.96946	-1.5702
Gα12/13 Signaling	1.57	0.0538	-0.816	FGFR2	fibroblast growth factor receptor 2	Plasma Membrane	kinase	0.000292993	7.4204e-05	down	4.45302	-4.45302	-2.15478
RAR Activation	1.57	0.0474	NaN	DHRS3	dehydrogenase/reductase (SDR family) member 3	Cytoplasm	enzyme	5.50777e-05	1.38983e-06	down	2.98607	-2.98607	-1.57825
RAR Activation	1.57	0.0474	NaN	ALDH1A1	aldehyde dehydrogenase 1 family member A1	Cytoplasm	enzyme	4.38315e-05	5.73166e-07	down	3.45275	-3.45275	-1.78775
RAR Activation	1.57	0.0474	NaN	PRKAR2B	protein kinase cAMP-dependent type II regulatory subunit beta	Cytoplasm	kinase	0.000487765	0.000185126	down	3.53523	-3.53523	-1.8218
RAR Activation	1.57	0.0474	NaN	RDH10	retinol dehydrogenase 10 (all-trans)	Nucleus	enzyme	0.00180195	0.00137543	down	3.43556	-3.43556	-1.78055
RAR Activation	1.57	0.0474	NaN	MAP3K1	mitogen-activated protein kinase kinase kinase 1	Cytoplasm	kinase	0.000104164	9.08987e-06	down	2.99182	-2.99182	-1.58102
RAR Activation	1.57	0.0474	NaN	IGFBP3	insulin like growth factor binding protein 3	Extracellular Space	other	2.3646e-05	3.67681e-08	down	2.30432	-2.30432	-1.20434
RAR Activation	1.57	0.0474	NaN	NR2F6	nuclear receptor subfamily 2 group F member 6	Nucleus	ligand-dependent nuclear receptor	6.05334e-05	2.06189e-06	down	2.2978	-2.2978	-1.20026
RAR Activation	1.57	0.0474	NaN	ADCY7	adenylate cyclase 7	Plasma Membrane	enzyme	0.000171656	2.62247e-05	down	2.13945	-2.13945	-1.09724
RAR Activation	1.57	0.0474	NaN	MMP1	matrix metallopeptidase 1	Extracellular Space	peptidase	2.99009e-05	6.82824e-08	up	3.68258	3.68258	1.88072
Gαq Signaling	1.56	0.05	-1.633	HMOX1	heme oxygenase 1	Cytoplasm	enzyme	3.07978e-05	1.0198e-07	up	7.17615	7.17615	2.84321
Gαq Signaling	1.56	0.05	-1.633	PLCB4	phospholipase C beta 4	Cytoplasm	enzyme	0.000577089	0.000248086	down	2.07794	-2.07794	-1.05515
Gαq Signaling	1.56	0.05	-1.633	GAB1	GRB2 associated binding protein 1	Cytoplasm	kinase	0.000120758	1.28231e-05	down	2.38756	-2.38756	-1.25554
Gαq Signaling	1.56	0.05	-1.633	RHOB	ras homolog family member B	Cytoplasm	enzyme	6.81397e-05	2.79312e-06	down	3.93244	-3.93244	-1.97543
Gαq Signaling	1.56	0.05	-1.633	NFKBIE	NFKB inhibitor epsilon	Nucleus	transcription regulator	7.29755e-05	3.81911e-06	up	2.23963	2.23963	1.16326
Gαq Signaling	1.56	0.05	-1.633	RGS4	regulator of G-protein signaling 4	Cytoplasm	other	4.9534e-05	9.97018e-07	up	2.89909	2.89909	1.5356
Gαq Signaling	1.56	0.05	-1.633	FGFR2	fibroblast growth factor receptor 2	Plasma Membrane	kinase	0.000292993	7.4204e-05	down	4.45302	-4.45302	-2.15478
Gαq Signaling	1.56	0.05	-1.633	GNG12	G protein subunit gamma 12	Plasma Membrane	enzyme	0.000320542	8.8399e-05	down	3.05299	-3.05299	-1.61022
Role of PI3K/AKT Signaling in the Pathogenesis of Influenza	1.56	0.0658	-1	GAB1	GRB2 associated binding protein 1	Cytoplasm	kinase	0.000120758	1.28231e-05	down	2.38756	-2.38756	-1.25554
Role of PI3K/AKT Signaling in the Pathogenesis of Influenza	1.56	0.0658	-1	NFKBIE	NFKB inhibitor epsilon	Nucleus	transcription regulator	7.29755e-05	3.81911e-06	up	2.23963	2.23963	1.16326
Role of PI3K/AKT Signaling in the Pathogenesis of Influenza	1.56	0.0658	-1	FGFR2	fibroblast growth factor receptor 2	Plasma Membrane	kinase	0.000292993	7.4204e-05	down	4.45302	-4.45302	-2.15478
Role of PI3K/AKT Signaling in the Pathogenesis of Influenza	1.56	0.0658	-1	CCL5	C-C motif chemokine ligand 5	Extracellular Space	cytokine	0.000244253	5.08419e-05	up	3.69923	3.69923	1.88723
Role of PI3K/AKT Signaling in the Pathogenesis of Influenza	1.56	0.0658	-1	PLAC8	placenta specific 8	Nucleus	other	5.71384e-05	1.64277e-06	down	2.36696	-2.36696	-1.24304
Antioxidant Action of Vitamin C	1.55	0.0583	-1.633	HMOX1	heme oxygenase 1	Cytoplasm	enzyme	3.07978e-05	1.0198e-07	up	7.17615	7.17615	2.84321
Antioxidant Action of Vitamin C	1.55	0.0583	-1.633	PLA2G4A	phospholipase A2 group IVA	Cytoplasm	enzyme	0.000319621	8.78429e-05	up	2.0774	2.0774	1.05478
Antioxidant Action of Vitamin C	1.55	0.0583	-1.633	PLCB4	phospholipase C beta 4	Cytoplasm	enzyme	0.000577089	0.000248086	down	2.07794	-2.07794	-1.05515
Antioxidant Action of Vitamin C	1.55	0.0583	-1.633	NFKBIE	NFKB inhibitor epsilon	Nucleus	transcription regulator	7.29755e-05	3.81911e-06	up	2.23963	2.23963	1.16326
Antioxidant Action of Vitamin C	1.55	0.0583	-1.633	CSF2	colony stimulating factor 2	Extracellular Space	cytokine	0.000181511	2.91396e-05	up	3.2134	3.2134	1.6841
Antioxidant Action of Vitamin C	1.55	0.0583	-1.633	TNF	tumor necrosis factor	Extracellular Space	cytokine	0.000291147	7.31026e-05	up	2.74571	2.74571	1.45718
Hematopoiesis from Multipotent Stem Cells	1.55	0.167	NaN	KITLG	KIT ligand	Extracellular Space	growth factor	3.70634e-05	2.92673e-07	down	2.80656	-2.80656	-1.4888
Hematopoiesis from Multipotent Stem Cells	1.55	0.167	NaN	CSF2	colony stimulating factor 2	Extracellular Space	cytokine	0.000181511	2.91396e-05	up	3.2134	3.2134	1.6841
P2Y Purigenic Receptor Signaling Pathway	1.54	0.053	-1.633	P2RY2	purinergic receptor P2Y2	Plasma Membrane	G-protein coupled receptor	0.000285062	7.05316e-05	up	2.09703	2.09703	1.06835
P2Y Purigenic Receptor Signaling Pathway	1.54	0.053	-1.633	PLCB4	phospholipase C beta 4	Cytoplasm	enzyme	0.000577089	0.000248086	down	2.07794	-2.07794	-1.05515
P2Y Purigenic Receptor Signaling Pathway	1.54	0.053	-1.633	PRKAR2B	protein kinase cAMP-dependent type II regulatory subunit beta	Cytoplasm	kinase	0.000487765	0.000185126	down	3.53523	-3.53523	-1.8218
P2Y Purigenic Receptor Signaling Pathway	1.54	0.053	-1.633	GAB1	GRB2 associated binding protein 1	Cytoplasm	kinase	0.000120758	1.28231e-05	down	2.38756	-2.38756	-1.25554
P2Y Purigenic Receptor Signaling Pathway	1.54	0.053	-1.633	FGFR2	fibroblast growth factor receptor 2	Plasma Membrane	kinase	0.000292993	7.4204e-05	down	4.45302	-4.45302	-2.15478
P2Y Purigenic Receptor Signaling Pathway	1.54	0.053	-1.633	ADCY7	adenylate cyclase 7	Plasma Membrane	enzyme	0.000171656	2.62247e-05	down	2.13945	-2.13945	-1.09724
P2Y Purigenic Receptor Signaling Pathway	1.54	0.053	-1.633	GNG12	G protein subunit gamma 12	Plasma Membrane	enzyme	0.000320542	8.8399e-05	down	3.05299	-3.05299	-1.61022
Role of Cytokines in Mediating Communication between Immune Cells	1.49	0.0741	NaN	CXCL8	C-X-C motif chemokine ligand 8	Extracellular Space	cytokine	4.70395e-05	7.41202e-07	up	6.01014	6.01014	2.5874
Role of Cytokines in Mediating Communication between Immune Cells	1.49	0.0741	NaN	IL6	interleukin 6	Extracellular Space	cytokine	3.65159e-05	2.68298e-07	up	2.78882	2.78882	1.47965
Role of Cytokines in Mediating Communication between Immune Cells	1.49	0.0741	NaN	CSF2	colony stimulating factor 2	Extracellular Space	cytokine	0.000181511	2.91396e-05	up	3.2134	3.2134	1.6841
Role of Cytokines in Mediating Communication between Immune Cells	1.49	0.0741	NaN	TNF	tumor necrosis factor	Extracellular Space	cytokine	0.000291147	7.31026e-05	up	2.74571	2.74571	1.45718
ILK Signaling	1.49	0.0459	0	GAB1	GRB2 associated binding protein 1	Cytoplasm	kinase	0.000120758	1.28231e-05	down	2.38756	-2.38756	-1.25554
ILK Signaling	1.49	0.0459	0	RHOB	ras homolog family member B	Cytoplasm	enzyme	6.81397e-05	2.79312e-06	down	3.93244	-3.93244	-1.97543
ILK Signaling	1.49	0.0459	0	VEGFC	vascular endothelial growth factor C	Extracellular Space	growth factor	4.25833e-05	4.70028e-07	up	2.6596	2.6596	1.41121
ILK Signaling	1.49	0.0459	0	FGFR2	fibroblast growth factor receptor 2	Plasma Membrane	kinase	0.000292993	7.4204e-05	down	4.45302	-4.45302	-2.15478
ILK Signaling	1.49	0.0459	0	RPS6KA5	ribosomal protein S6 kinase A5	Nucleus	kinase	0.000896053	0.000519236	up	2.57033	2.57033	1.36195
ILK Signaling	1.49	0.0459	0	ITGB6	integrin subunit beta 6	Plasma Membrane	other	0.000220499	4.13446e-05	down	2.73909	-2.73909	-1.4537
ILK Signaling	1.49	0.0459	0	PPP2R1B	protein phosphatase 2 regulatory subunit A, beta	Plasma Membrane	phosphatase	0.00054298	0.000223565	down	3.20601	-3.20601	-1.68078
ILK Signaling	1.49	0.0459	0	TNF	tumor necrosis factor	Extracellular Space	cytokine	0.000291147	7.31026e-05	up	2.74571	2.74571	1.45718
ILK Signaling	1.49	0.0459	0	MMP9	matrix metallopeptidase 9	Extracellular Space	peptidase	0.000105861	9.4402e-06	up	5.58648	5.58648	2.48194
Choline Biosynthesis III	1.48	0.154	NaN	HMOX1	heme oxygenase 1	Cytoplasm	enzyme	3.07978e-05	1.0198e-07	up	7.17615	7.17615	2.84321
Choline Biosynthesis III	1.48	0.154	NaN	CHPT1	choline phosphotransferase 1	Cytoplasm	enzyme	0.000497943	0.000191546	down	2.1177	-2.1177	-1.0825
Growth Hormone Signaling	1.46	0.0617	-1.342	GAB1	GRB2 associated binding protein 1	Cytoplasm	kinase	0.000120758	1.28231e-05	down	2.38756	-2.38756	-1.25554
Growth Hormone Signaling	1.46	0.0617	-1.342	IGFBP3	insulin like growth factor binding protein 3	Extracellular Space	other	2.3646e-05	3.67681e-08	down	2.30432	-2.30432	-1.20434
Growth Hormone Signaling	1.46	0.0617	-1.342	FGFR2	fibroblast growth factor receptor 2	Plasma Membrane	kinase	0.000292993	7.4204e-05	down	4.45302	-4.45302	-2.15478
Growth Hormone Signaling	1.46	0.0617	-1.342	RPS6KA5	ribosomal protein S6 kinase A5	Nucleus	kinase	0.000896053	0.000519236	up	2.57033	2.57033	1.36195
Growth Hormone Signaling	1.46	0.0617	-1.342	STAT1	signal transducer and activator of transcription 1	Nucleus	transcription regulator	0.000127302	1.44319e-05	down	2.48387	-2.48387	-1.31259
Renal Cell Carcinoma Signaling	1.46	0.0617	0	ETS1	ETS proto-oncogene 1, transcription factor	Nucleus	transcription regulator	0.000727446	0.000371116	up	2.14953	2.14953	1.10402
Renal Cell Carcinoma Signaling	1.46	0.0617	0	GAB1	GRB2 associated binding protein 1	Cytoplasm	kinase	0.000120758	1.28231e-05	down	2.38756	-2.38756	-1.25554
Renal Cell Carcinoma Signaling	1.46	0.0617	0	FGFR2	fibroblast growth factor receptor 2	Plasma Membrane	kinase	0.000292993	7.4204e-05	down	4.45302	-4.45302	-2.15478
Renal Cell Carcinoma Signaling	1.46	0.0617	0	EGLN3	egl-9 family hypoxia-inducible factor 3	Cytoplasm	enzyme	0.000151048	1.99892e-05	down	2.79284	-2.79284	-1.48173
Renal Cell Carcinoma Signaling	1.46	0.0617	0	RAP1A	RAP1A, member of RAS oncogene family	Cytoplasm	enzyme	5.67199e-05	1.48871e-06	up	2.16819	2.16819	1.11649
mTOR Signaling	1.46	0.0452	0.378	HMOX1	heme oxygenase 1	Cytoplasm	enzyme	3.07978e-05	1.0198e-07	up	7.17615	7.17615	2.84321
mTOR Signaling	1.46	0.0452	0.378	GAB1	GRB2 associated binding protein 1	Cytoplasm	kinase	0.000120758	1.28231e-05	down	2.38756	-2.38756	-1.25554
mTOR Signaling	1.46	0.0452	0.378	RHOB	ras homolog family member B	Cytoplasm	enzyme	6.81397e-05	2.79312e-06	down	3.93244	-3.93244	-1.97543
mTOR Signaling	1.46	0.0452	0.378	PRKAA1	protein kinase AMP-activated catalytic subunit alpha 1	Cytoplasm	kinase	0.00048552	0.000183941	down	2.44451	-2.44451	-1.28954
mTOR Signaling	1.46	0.0452	0.378	VEGFC	vascular endothelial growth factor C	Extracellular Space	growth factor	4.25833e-05	4.70028e-07	up	2.6596	2.6596	1.41121
mTOR Signaling	1.46	0.0452	0.378	FGFR2	fibroblast growth factor receptor 2	Plasma Membrane	kinase	0.000292993	7.4204e-05	down	4.45302	-4.45302	-2.15478
mTOR Signaling	1.46	0.0452	0.378	RPS6KA5	ribosomal protein S6 kinase A5	Nucleus	kinase	0.000896053	0.000519236	up	2.57033	2.57033	1.36195
mTOR Signaling	1.46	0.0452	0.378	PPP2R1B	protein phosphatase 2 regulatory subunit A, beta	Plasma Membrane	phosphatase	0.00054298	0.000223565	down	3.20601	-3.20601	-1.68078
mTOR Signaling	1.46	0.0452	0.378	RPSA	ribosomal protein SA	Cytoplasm	translation regulator	4.9534e-05	1.00921e-06	up	4.16121	4.16121	2.057
MIF-mediated Glucocorticoid Regulation	1.44	0.0909	NaN	PLA2G4A	phospholipase A2 group IVA	Cytoplasm	enzyme	0.000319621	8.78429e-05	up	2.0774	2.0774	1.05478
MIF-mediated Glucocorticoid Regulation	1.44	0.0909	NaN	LY96	lymphocyte antigen 96	Plasma Membrane	transmembrane receptor	0.000399174	0.000129442	up	2.09875	2.09875	1.06953
MIF-mediated Glucocorticoid Regulation	1.44	0.0909	NaN	NFKBIE	NFKB inhibitor epsilon	Nucleus	transcription regulator	7.29755e-05	3.81911e-06	up	2.23963	2.23963	1.16326
Tec Kinase Signaling	1.43	0.0471	-1.633	GAB1	GRB2 associated binding protein 1	Cytoplasm	kinase	0.000120758	1.28231e-05	down	2.38756	-2.38756	-1.25554
Tec Kinase Signaling	1.43	0.0471	-1.633	RHOB	ras homolog family member B	Cytoplasm	enzyme	6.81397e-05	2.79312e-06	down	3.93244	-3.93244	-1.97543
Tec Kinase Signaling	1.43	0.0471	-1.633	VAV3	vav guanine nucleotide exchange factor 3	Extracellular Space	cytokine	9.63321e-05	7.8327e-06	down	8.02289	-8.02289	-3.00412
Tec Kinase Signaling	1.43	0.0471	-1.633	ITGA2	integrin subunit alpha 2	Plasma Membrane	transmembrane receptor	0.000106124	9.61516e-06	up	4.46447	4.46447	2.15849
Tec Kinase Signaling	1.43	0.0471	-1.633	FGFR2	fibroblast growth factor receptor 2	Plasma Membrane	kinase	0.000292993	7.4204e-05	down	4.45302	-4.45302	-2.15478
Tec Kinase Signaling	1.43	0.0471	-1.633	STAT1	signal transducer and activator of transcription 1	Nucleus	transcription regulator	0.000127302	1.44319e-05	down	2.48387	-2.48387	-1.31259
Tec Kinase Signaling	1.43	0.0471	-1.633	TNF	tumor necrosis factor	Extracellular Space	cytokine	0.000291147	7.31026e-05	up	2.74571	2.74571	1.45718
Tec Kinase Signaling	1.43	0.0471	-1.633	GNG12	G protein subunit gamma 12	Plasma Membrane	enzyme	0.000320542	8.8399e-05	down	3.05299	-3.05299	-1.61022
JAK/Stat Signaling	1.42	0.0602	-1.342	GAB1	GRB2 associated binding protein 1	Cytoplasm	kinase	0.000120758	1.28231e-05	down	2.38756	-2.38756	-1.25554
JAK/Stat Signaling	1.42	0.0602	-1.342	CDKN1A	cyclin-dependent kinase inhibitor 1A	Nucleus	kinase	0.000177018	2.76906e-05	up	2.34183	2.34183	1.22764
JAK/Stat Signaling	1.42	0.0602	-1.342	FGFR2	fibroblast growth factor receptor 2	Plasma Membrane	kinase	0.000292993	7.4204e-05	down	4.45302	-4.45302	-2.15478
JAK/Stat Signaling	1.42	0.0602	-1.342	IL6	interleukin 6	Extracellular Space	cytokine	3.65159e-05	2.68298e-07	up	2.78882	2.78882	1.47965
JAK/Stat Signaling	1.42	0.0602	-1.342	STAT1	signal transducer and activator of transcription 1	Nucleus	transcription regulator	0.000127302	1.44319e-05	down	2.48387	-2.48387	-1.31259
Corticotropin Releasing Hormone Signaling	1.42	0.0541	0	PRKAR2B	protein kinase cAMP-dependent type II regulatory subunit beta	Cytoplasm	kinase	0.000487765	0.000185126	down	3.53523	-3.53523	-1.8218
Corticotropin Releasing Hormone Signaling	1.42	0.0541	0	MEF2D	myocyte enhancer factor 2D	Nucleus	transcription regulator	0.000102885	8.85955e-06	up	2.07063	2.07063	1.05007
Corticotropin Releasing Hormone Signaling	1.42	0.0541	0	PTCH1	patched 1	Plasma Membrane	transmembrane receptor	0.000788746	0.000423282	down	2.08064	-2.08064	-1.05703
Corticotropin Releasing Hormone Signaling	1.42	0.0541	0	ADCY7	adenylate cyclase 7	Plasma Membrane	enzyme	0.000171656	2.62247e-05	down	2.13945	-2.13945	-1.09724
Corticotropin Releasing Hormone Signaling	1.42	0.0541	0	RAP1A	RAP1A, member of RAS oncogene family	Cytoplasm	enzyme	5.67199e-05	1.48871e-06	up	2.16819	2.16819	1.11649
Corticotropin Releasing Hormone Signaling	1.42	0.0541	0	GUCY1B3	guanylate cyclase 1, soluble, beta 3	Cytoplasm	enzyme	0.000294466	7.54152e-05	down	2.03253	-2.03253	-1.02328
Oncostatin M Signaling	1.4	0.0882	NaN	PLAU	plasminogen activator, urokinase	Extracellular Space	peptidase	7.29755e-05	3.74487e-06	up	4.08751	4.08751	2.03122
Oncostatin M Signaling	1.4	0.0882	NaN	STAT1	signal transducer and activator of transcription 1	Nucleus	transcription regulator	0.000127302	1.44319e-05	down	2.48387	-2.48387	-1.31259
Oncostatin M Signaling	1.4	0.0882	NaN	MMP1	matrix metallopeptidase 1	Extracellular Space	peptidase	2.99009e-05	6.82824e-08	up	3.68258	3.68258	1.88072
PEDF Signaling	1.4	0.0595	-2	ARHGAP22	Rho GTPase activating protein 22	Cytoplasm	other	4.21995e-05	4.57747e-07	up	2.59293	2.59293	1.37458
PEDF Signaling	1.4	0.0595	-2	SOD2	superoxide dismutase 2, mitochondrial	Cytoplasm	enzyme	5.71384e-05	1.58904e-06	up	2.2088	2.2088	1.14326
PEDF Signaling	1.4	0.0595	-2	GAB1	GRB2 associated binding protein 1	Cytoplasm	kinase	0.000120758	1.28231e-05	down	2.38756	-2.38756	-1.25554
PEDF Signaling	1.4	0.0595	-2	NFKBIE	NFKB inhibitor epsilon	Nucleus	transcription regulator	7.29755e-05	3.81911e-06	up	2.23963	2.23963	1.16326
PEDF Signaling	1.4	0.0595	-2	FGFR2	fibroblast growth factor receptor 2	Plasma Membrane	kinase	0.000292993	7.4204e-05	down	4.45302	-4.45302	-2.15478
Leptin Signaling in Obesity	1.38	0.0588	NaN	PLCB4	phospholipase C beta 4	Cytoplasm	enzyme	0.000577089	0.000248086	down	2.07794	-2.07794	-1.05515
Leptin Signaling in Obesity	1.38	0.0588	NaN	PRKAR2B	protein kinase cAMP-dependent type II regulatory subunit beta	Cytoplasm	kinase	0.000487765	0.000185126	down	3.53523	-3.53523	-1.8218
Leptin Signaling in Obesity	1.38	0.0588	NaN	GAB1	GRB2 associated binding protein 1	Cytoplasm	kinase	0.000120758	1.28231e-05	down	2.38756	-2.38756	-1.25554
Leptin Signaling in Obesity	1.38	0.0588	NaN	FGFR2	fibroblast growth factor receptor 2	Plasma Membrane	kinase	0.000292993	7.4204e-05	down	4.45302	-4.45302	-2.15478
Leptin Signaling in Obesity	1.38	0.0588	NaN	ADCY7	adenylate cyclase 7	Plasma Membrane	enzyme	0.000171656	2.62247e-05	down	2.13945	-2.13945	-1.09724
NF-κB Activation by Viruses	1.36	0.0581	-0.447	GAB1	GRB2 associated binding protein 1	Cytoplasm	kinase	0.000120758	1.28231e-05	down	2.38756	-2.38756	-1.25554
NF-κB Activation by Viruses	1.36	0.0581	-0.447	NFKBIE	NFKB inhibitor epsilon	Nucleus	transcription regulator	7.29755e-05	3.81911e-06	up	2.23963	2.23963	1.16326
NF-κB Activation by Viruses	1.36	0.0581	-0.447	ITGA2	integrin subunit alpha 2	Plasma Membrane	transmembrane receptor	0.000106124	9.61516e-06	up	4.46447	4.46447	2.15849
NF-κB Activation by Viruses	1.36	0.0581	-0.447	MAP3K1	mitogen-activated protein kinase kinase kinase 1	Cytoplasm	kinase	0.000104164	9.08987e-06	down	2.99182	-2.99182	-1.58102
NF-κB Activation by Viruses	1.36	0.0581	-0.447	FGFR2	fibroblast growth factor receptor 2	Plasma Membrane	kinase	0.000292993	7.4204e-05	down	4.45302	-4.45302	-2.15478
Guanine and Guanosine Salvage I	1.36	0.5	NaN	PNP	purine nucleoside phosphorylase	Nucleus	enzyme	0.000136714	1.65212e-05	up	2.01143	2.01143	1.00822
4-hydroxyproline Degradation I	1.36	0.5	NaN	HOGA1	4-hydroxy-2-oxoglutarate aldolase 1	Cytoplasm	enzyme	0.000269349	6.23254e-05	down	3.58972	-3.58972	-1.84387
Adenine and Adenosine Salvage I	1.36	0.5	NaN	PNP	purine nucleoside phosphorylase	Nucleus	enzyme	0.000136714	1.65212e-05	up	2.01143	2.01143	1.00822
PPARα/RXRα Activation	1.33	0.0449	NaN	PLCB4	phospholipase C beta 4	Cytoplasm	enzyme	0.000577089	0.000248086	down	2.07794	-2.07794	-1.05515
PPARα/RXRα Activation	1.33	0.0449	NaN	PRKAR2B	protein kinase cAMP-dependent type II regulatory subunit beta	Cytoplasm	kinase	0.000487765	0.000185126	down	3.53523	-3.53523	-1.8218
PPARα/RXRα Activation	1.33	0.0449	NaN	GPD2	glycerol-3-phosphate dehydrogenase 2	Cytoplasm	enzyme	5.90349e-05	1.79976e-06	down	2.02677	-2.02677	-1.01918
PPARα/RXRα Activation	1.33	0.0449	NaN	NFKBIE	NFKB inhibitor epsilon	Nucleus	transcription regulator	7.29755e-05	3.81911e-06	up	2.23963	2.23963	1.16326
PPARα/RXRα Activation	1.33	0.0449	NaN	PRKAA1	protein kinase AMP-activated catalytic subunit alpha 1	Cytoplasm	kinase	0.00048552	0.000183941	down	2.44451	-2.44451	-1.28954
PPARα/RXRα Activation	1.33	0.0449	NaN	IL6	interleukin 6	Extracellular Space	cytokine	3.65159e-05	2.68298e-07	up	2.78882	2.78882	1.47965
PPARα/RXRα Activation	1.33	0.0449	NaN	ADCY7	adenylate cyclase 7	Plasma Membrane	enzyme	0.000171656	2.62247e-05	down	2.13945	-2.13945	-1.09724
PPARα/RXRα Activation	1.33	0.0449	NaN	MAP4K4	mitogen-activated protein kinase kinase kinase kinase 4	Cytoplasm	kinase	0.000136555	1.64327e-05	up	2.15776	2.15776	1.10954
HER-2 Signaling in Breast Cancer	1.33	0.0568	NaN	GAB1	GRB2 associated binding protein 1	Cytoplasm	kinase	0.000120758	1.28231e-05	down	2.38756	-2.38756	-1.25554
HER-2 Signaling in Breast Cancer	1.33	0.0568	NaN	CDKN1A	cyclin-dependent kinase inhibitor 1A	Nucleus	kinase	0.000177018	2.76906e-05	up	2.34183	2.34183	1.22764
HER-2 Signaling in Breast Cancer	1.33	0.0568	NaN	FGFR2	fibroblast growth factor receptor 2	Plasma Membrane	kinase	0.000292993	7.4204e-05	down	4.45302	-4.45302	-2.15478
HER-2 Signaling in Breast Cancer	1.33	0.0568	NaN	ITGB6	integrin subunit beta 6	Plasma Membrane	other	0.000220499	4.13446e-05	down	2.73909	-2.73909	-1.4537
HER-2 Signaling in Breast Cancer	1.33	0.0568	NaN	AREG	amphiregulin	Extracellular Space	growth factor	0.00030687	8.06945e-05	up	2.63063	2.63063	1.39541
VEGF Family Ligand-Receptor Interactions	1.33	0.0568	0	PLA2G4A	phospholipase A2 group IVA	Cytoplasm	enzyme	0.000319621	8.78429e-05	up	2.0774	2.0774	1.05478
VEGF Family Ligand-Receptor Interactions	1.33	0.0568	0	NRP2	neuropilin 2	Plasma Membrane	kinase	0.000805229	0.000439483	down	2.02262	-2.02262	-1.01622
VEGF Family Ligand-Receptor Interactions	1.33	0.0568	0	GAB1	GRB2 associated binding protein 1	Cytoplasm	kinase	0.000120758	1.28231e-05	down	2.38756	-2.38756	-1.25554
VEGF Family Ligand-Receptor Interactions	1.33	0.0568	0	VEGFC	vascular endothelial growth factor C	Extracellular Space	growth factor	4.25833e-05	4.70028e-07	up	2.6596	2.6596	1.41121
VEGF Family Ligand-Receptor Interactions	1.33	0.0568	0	FGFR2	fibroblast growth factor receptor 2	Plasma Membrane	kinase	0.000292993	7.4204e-05	down	4.45302	-4.45302	-2.15478
Extrinsic Prothrombin Activation Pathway	1.31	0.125	NaN	THBD	thrombomodulin	Plasma Membrane	transmembrane receptor	8.17504e-05	5.46994e-06	up	3.21574	3.21574	1.68515
Extrinsic Prothrombin Activation Pathway	1.31	0.125	NaN	F3	coagulation factor III, tissue factor	Plasma Membrane	transmembrane receptor	0.000167293	2.45862e-05	up	2.83358	2.83358	1.50263
Fc Epsilon RI Signaling	1.3	0.0504	-1	PLA2G4A	phospholipase A2 group IVA	Cytoplasm	enzyme	0.000319621	8.78429e-05	up	2.0774	2.0774	1.05478
Fc Epsilon RI Signaling	1.3	0.0504	-1	GAB1	GRB2 associated binding protein 1	Cytoplasm	kinase	0.000120758	1.28231e-05	down	2.38756	-2.38756	-1.25554
Fc Epsilon RI Signaling	1.3	0.0504	-1	VAV3	vav guanine nucleotide exchange factor 3	Extracellular Space	cytokine	9.63321e-05	7.8327e-06	down	8.02289	-8.02289	-3.00412
Fc Epsilon RI Signaling	1.3	0.0504	-1	FGFR2	fibroblast growth factor receptor 2	Plasma Membrane	kinase	0.000292993	7.4204e-05	down	4.45302	-4.45302	-2.15478
Fc Epsilon RI Signaling	1.3	0.0504	-1	CSF2	colony stimulating factor 2	Extracellular Space	cytokine	0.000181511	2.91396e-05	up	3.2134	3.2134	1.6841
Fc Epsilon RI Signaling	1.3	0.0504	-1	TNF	tumor necrosis factor	Extracellular Space	cytokine	0.000291147	7.31026e-05	up	2.74571	2.74571	1.45718
CNTF Signaling	1.28	0.0635	-1	GAB1	GRB2 associated binding protein 1	Cytoplasm	kinase	0.000120758	1.28231e-05	down	2.38756	-2.38756	-1.25554
CNTF Signaling	1.28	0.0635	-1	FGFR2	fibroblast growth factor receptor 2	Plasma Membrane	kinase	0.000292993	7.4204e-05	down	4.45302	-4.45302	-2.15478
CNTF Signaling	1.28	0.0635	-1	RPS6KA5	ribosomal protein S6 kinase A5	Nucleus	kinase	0.000896053	0.000519236	up	2.57033	2.57033	1.36195
CNTF Signaling	1.28	0.0635	-1	STAT1	signal transducer and activator of transcription 1	Nucleus	transcription regulator	0.000127302	1.44319e-05	down	2.48387	-2.48387	-1.31259
Gαi Signaling	1.28	0.05	-0.447	PRKAR2B	protein kinase cAMP-dependent type II regulatory subunit beta	Cytoplasm	kinase	0.000487765	0.000185126	down	3.53523	-3.53523	-1.8218
Gαi Signaling	1.28	0.05	-0.447	S1PR1	sphingosine-1-phosphate receptor 1	Plasma Membrane	G-protein coupled receptor	1.48349e-06	3.38774e-10	down	7.79723	-7.79723	-2.96296
Gαi Signaling	1.28	0.05	-0.447	RGS4	regulator of G-protein signaling 4	Cytoplasm	other	4.9534e-05	9.97018e-07	up	2.89909	2.89909	1.5356
Gαi Signaling	1.28	0.05	-0.447	ADCY7	adenylate cyclase 7	Plasma Membrane	enzyme	0.000171656	2.62247e-05	down	2.13945	-2.13945	-1.09724
Gαi Signaling	1.28	0.05	-0.447	RAP1A	RAP1A, member of RAS oncogene family	Cytoplasm	enzyme	5.67199e-05	1.48871e-06	up	2.16819	2.16819	1.11649
Gαi Signaling	1.28	0.05	-0.447	GNG12	G protein subunit gamma 12	Plasma Membrane	enzyme	0.000320542	8.8399e-05	down	3.05299	-3.05299	-1.61022
April Mediated Signaling	1.28	0.0789	NaN	NFKBIE	NFKB inhibitor epsilon	Nucleus	transcription regulator	7.29755e-05	3.81911e-06	up	2.23963	2.23963	1.16326
April Mediated Signaling	1.28	0.0789	NaN	MAP3K1	mitogen-activated protein kinase kinase kinase 1	Cytoplasm	kinase	0.000104164	9.08987e-06	down	2.99182	-2.99182	-1.58102
April Mediated Signaling	1.28	0.0789	NaN	TRAF1	TNF receptor associated factor 1	Cytoplasm	other	7.2424e-05	3.63029e-06	up	5.55985	5.55985	2.47505
fMLP Signaling in Neutrophils	1.27	0.0496	-1.342	PLCB4	phospholipase C beta 4	Cytoplasm	enzyme	0.000577089	0.000248086	down	2.07794	-2.07794	-1.05515
fMLP Signaling in Neutrophils	1.27	0.0496	-1.342	GAB1	GRB2 associated binding protein 1	Cytoplasm	kinase	0.000120758	1.28231e-05	down	2.38756	-2.38756	-1.25554
fMLP Signaling in Neutrophils	1.27	0.0496	-1.342	NFKBIE	NFKB inhibitor epsilon	Nucleus	transcription regulator	7.29755e-05	3.81911e-06	up	2.23963	2.23963	1.16326
fMLP Signaling in Neutrophils	1.27	0.0496	-1.342	NCF2	neutrophil cytosolic factor 2	Cytoplasm	enzyme	0.000241371	4.9582e-05	up	2.83754	2.83754	1.50464
fMLP Signaling in Neutrophils	1.27	0.0496	-1.342	FGFR2	fibroblast growth factor receptor 2	Plasma Membrane	kinase	0.000292993	7.4204e-05	down	4.45302	-4.45302	-2.15478
fMLP Signaling in Neutrophils	1.27	0.0496	-1.342	GNG12	G protein subunit gamma 12	Plasma Membrane	enzyme	0.000320542	8.8399e-05	down	3.05299	-3.05299	-1.61022
Sphingosine-1-phosphate Signaling	1.25	0.0492	-1.633	PLCB4	phospholipase C beta 4	Cytoplasm	enzyme	0.000577089	0.000248086	down	2.07794	-2.07794	-1.05515
Sphingosine-1-phosphate Signaling	1.25	0.0492	-1.633	GAB1	GRB2 associated binding protein 1	Cytoplasm	kinase	0.000120758	1.28231e-05	down	2.38756	-2.38756	-1.25554
Sphingosine-1-phosphate Signaling	1.25	0.0492	-1.633	RHOB	ras homolog family member B	Cytoplasm	enzyme	6.81397e-05	2.79312e-06	down	3.93244	-3.93244	-1.97543
Sphingosine-1-phosphate Signaling	1.25	0.0492	-1.633	S1PR1	sphingosine-1-phosphate receptor 1	Plasma Membrane	G-protein coupled receptor	1.48349e-06	3.38774e-10	down	7.79723	-7.79723	-2.96296
Sphingosine-1-phosphate Signaling	1.25	0.0492	-1.633	FGFR2	fibroblast growth factor receptor 2	Plasma Membrane	kinase	0.000292993	7.4204e-05	down	4.45302	-4.45302	-2.15478
Sphingosine-1-phosphate Signaling	1.25	0.0492	-1.633	ADCY7	adenylate cyclase 7	Plasma Membrane	enzyme	0.000171656	2.62247e-05	down	2.13945	-2.13945	-1.09724
phagosome formation	1.25	0.0492	NaN	TLR2	toll like receptor 2	Plasma Membrane	transmembrane receptor	8.09449e-05	5.23963e-06	up	4.16405	4.16405	2.05799
phagosome formation	1.25	0.0492	NaN	PLCB4	phospholipase C beta 4	Cytoplasm	enzyme	0.000577089	0.000248086	down	2.07794	-2.07794	-1.05515
phagosome formation	1.25	0.0492	NaN	GAB1	GRB2 associated binding protein 1	Cytoplasm	kinase	0.000120758	1.28231e-05	down	2.38756	-2.38756	-1.25554
phagosome formation	1.25	0.0492	NaN	RHOB	ras homolog family member B	Cytoplasm	enzyme	6.81397e-05	2.79312e-06	down	3.93244	-3.93244	-1.97543
phagosome formation	1.25	0.0492	NaN	ITGA2	integrin subunit alpha 2	Plasma Membrane	transmembrane receptor	0.000106124	9.61516e-06	up	4.46447	4.46447	2.15849
phagosome formation	1.25	0.0492	NaN	FGFR2	fibroblast growth factor receptor 2	Plasma Membrane	kinase	0.000292993	7.4204e-05	down	4.45302	-4.45302	-2.15478
Xenobiotic Metabolism Signaling	1.24	0.0385	NaN	HMOX1	heme oxygenase 1	Cytoplasm	enzyme	3.07978e-05	1.0198e-07	up	7.17615	7.17615	2.84321
Xenobiotic Metabolism Signaling	1.24	0.0385	NaN	CHST1	carbohydrate sulfotransferase 1	Cytoplasm	enzyme	0.00110681	0.000717112	up	3.40019	3.40019	1.76562
Xenobiotic Metabolism Signaling	1.24	0.0385	NaN	ALDH1A1	aldehyde dehydrogenase 1 family member A1	Cytoplasm	enzyme	4.38315e-05	5.73166e-07	down	3.45275	-3.45275	-1.78775
Xenobiotic Metabolism Signaling	1.24	0.0385	NaN	GAB1	GRB2 associated binding protein 1	Cytoplasm	kinase	0.000120758	1.28231e-05	down	2.38756	-2.38756	-1.25554
Xenobiotic Metabolism Signaling	1.24	0.0385	NaN	GSTA4	glutathione S-transferase alpha 4	Cytoplasm	enzyme	0.000411532	0.000137256	down	2.86343	-2.86343	-1.51774
Xenobiotic Metabolism Signaling	1.24	0.0385	NaN	MAP3K1	mitogen-activated protein kinase kinase kinase 1	Cytoplasm	kinase	0.000104164	9.08987e-06	down	2.99182	-2.99182	-1.58102
Xenobiotic Metabolism Signaling	1.24	0.0385	NaN	FGFR2	fibroblast growth factor receptor 2	Plasma Membrane	kinase	0.000292993	7.4204e-05	down	4.45302	-4.45302	-2.15478
Xenobiotic Metabolism Signaling	1.24	0.0385	NaN	IL6	interleukin 6	Extracellular Space	cytokine	3.65159e-05	2.68298e-07	up	2.78882	2.78882	1.47965
Xenobiotic Metabolism Signaling	1.24	0.0385	NaN	PPP2R1B	protein phosphatase 2 regulatory subunit A, beta	Plasma Membrane	phosphatase	0.00054298	0.000223565	down	3.20601	-3.20601	-1.68078
Xenobiotic Metabolism Signaling	1.24	0.0385	NaN	TNF	tumor necrosis factor	Extracellular Space	cytokine	0.000291147	7.31026e-05	up	2.74571	2.74571	1.45718
Xenobiotic Metabolism Signaling	1.24	0.0385	NaN	IL4I1	interleukin 4 induced 1	Cytoplasm	enzyme	6.88576e-05	2.98039e-06	up	3.48522	3.48522	1.80125
PXR/RXR Activation	1.24	0.0615	NaN	ALDH1A1	aldehyde dehydrogenase 1 family member A1	Cytoplasm	enzyme	4.38315e-05	5.73166e-07	down	3.45275	-3.45275	-1.78775
PXR/RXR Activation	1.24	0.0615	NaN	PRKAR2B	protein kinase cAMP-dependent type II regulatory subunit beta	Cytoplasm	kinase	0.000487765	0.000185126	down	3.53523	-3.53523	-1.8218
PXR/RXR Activation	1.24	0.0615	NaN	IL6	interleukin 6	Extracellular Space	cytokine	3.65159e-05	2.68298e-07	up	2.78882	2.78882	1.47965
PXR/RXR Activation	1.24	0.0615	NaN	TNF	tumor necrosis factor	Extracellular Space	cytokine	0.000291147	7.31026e-05	up	2.74571	2.74571	1.45718
B Cell Activating Factor Signaling	1.23	0.075	NaN	NFKBIE	NFKB inhibitor epsilon	Nucleus	transcription regulator	7.29755e-05	3.81911e-06	up	2.23963	2.23963	1.16326
B Cell Activating Factor Signaling	1.23	0.075	NaN	MAP3K1	mitogen-activated protein kinase kinase kinase 1	Cytoplasm	kinase	0.000104164	9.08987e-06	down	2.99182	-2.99182	-1.58102
B Cell Activating Factor Signaling	1.23	0.075	NaN	TRAF1	TNF receptor associated factor 1	Cytoplasm	other	7.2424e-05	3.63029e-06	up	5.55985	5.55985	2.47505
PI3K/AKT Signaling	1.23	0.0484	1	GAB1	GRB2 associated binding protein 1	Cytoplasm	kinase	0.000120758	1.28231e-05	down	2.38756	-2.38756	-1.25554
PI3K/AKT Signaling	1.23	0.0484	1	NFKBIE	NFKB inhibitor epsilon	Nucleus	transcription regulator	7.29755e-05	3.81911e-06	up	2.23963	2.23963	1.16326
PI3K/AKT Signaling	1.23	0.0484	1	GDF15	growth differentiation factor 15	Extracellular Space	growth factor	0.00194823	0.00151467	up	2.20534	2.20534	1.141
PI3K/AKT Signaling	1.23	0.0484	1	CDKN1A	cyclin-dependent kinase inhibitor 1A	Nucleus	kinase	0.000177018	2.76906e-05	up	2.34183	2.34183	1.22764
PI3K/AKT Signaling	1.23	0.0484	1	ITGA2	integrin subunit alpha 2	Plasma Membrane	transmembrane receptor	0.000106124	9.61516e-06	up	4.46447	4.46447	2.15849
PI3K/AKT Signaling	1.23	0.0484	1	PPP2R1B	protein phosphatase 2 regulatory subunit A, beta	Plasma Membrane	phosphatase	0.00054298	0.000223565	down	3.20601	-3.20601	-1.68078
MIF Regulation of Innate Immunity	1.2	0.0732	NaN	PLA2G4A	phospholipase A2 group IVA	Cytoplasm	enzyme	0.000319621	8.78429e-05	up	2.0774	2.0774	1.05478
MIF Regulation of Innate Immunity	1.2	0.0732	NaN	LY96	lymphocyte antigen 96	Plasma Membrane	transmembrane receptor	0.000399174	0.000129442	up	2.09875	2.09875	1.06953
MIF Regulation of Innate Immunity	1.2	0.0732	NaN	NFKBIE	NFKB inhibitor epsilon	Nucleus	transcription regulator	7.29755e-05	3.81911e-06	up	2.23963	2.23963	1.16326
Type II Diabetes Mellitus Signaling	1.19	0.0472	0	GAB1	GRB2 associated binding protein 1	Cytoplasm	kinase	0.000120758	1.28231e-05	down	2.38756	-2.38756	-1.25554
Type II Diabetes Mellitus Signaling	1.19	0.0472	0	NFKBIE	NFKB inhibitor epsilon	Nucleus	transcription regulator	7.29755e-05	3.81911e-06	up	2.23963	2.23963	1.16326
Type II Diabetes Mellitus Signaling	1.19	0.0472	0	MAP3K1	mitogen-activated protein kinase kinase kinase 1	Cytoplasm	kinase	0.000104164	9.08987e-06	down	2.99182	-2.99182	-1.58102
Type II Diabetes Mellitus Signaling	1.19	0.0472	0	PRKAA1	protein kinase AMP-activated catalytic subunit alpha 1	Cytoplasm	kinase	0.00048552	0.000183941	down	2.44451	-2.44451	-1.28954
Type II Diabetes Mellitus Signaling	1.19	0.0472	0	FGFR2	fibroblast growth factor receptor 2	Plasma Membrane	kinase	0.000292993	7.4204e-05	down	4.45302	-4.45302	-2.15478
Type II Diabetes Mellitus Signaling	1.19	0.0472	0	TNF	tumor necrosis factor	Extracellular Space	cytokine	0.000291147	7.31026e-05	up	2.74571	2.74571	1.45718
EGF Signaling	1.18	0.0588	-2	GAB1	GRB2 associated binding protein 1	Cytoplasm	kinase	0.000120758	1.28231e-05	down	2.38756	-2.38756	-1.25554
EGF Signaling	1.18	0.0588	-2	MAP3K1	mitogen-activated protein kinase kinase kinase 1	Cytoplasm	kinase	0.000104164	9.08987e-06	down	2.99182	-2.99182	-1.58102
EGF Signaling	1.18	0.0588	-2	FGFR2	fibroblast growth factor receptor 2	Plasma Membrane	kinase	0.000292993	7.4204e-05	down	4.45302	-4.45302	-2.15478
EGF Signaling	1.18	0.0588	-2	STAT1	signal transducer and activator of transcription 1	Nucleus	transcription regulator	0.000127302	1.44319e-05	down	2.48387	-2.48387	-1.31259
Glioblastoma Multiforme Signaling	1.18	0.044	-1.134	FZD8	frizzled class receptor 8	Plasma Membrane	G-protein coupled receptor	0.000607384	0.000270472	up	2.43015	2.43015	1.28104
Glioblastoma Multiforme Signaling	1.18	0.044	-1.134	PLCB4	phospholipase C beta 4	Cytoplasm	enzyme	0.000577089	0.000248086	down	2.07794	-2.07794	-1.05515
Glioblastoma Multiforme Signaling	1.18	0.044	-1.134	GAB1	GRB2 associated binding protein 1	Cytoplasm	kinase	0.000120758	1.28231e-05	down	2.38756	-2.38756	-1.25554
Glioblastoma Multiforme Signaling	1.18	0.044	-1.134	RHOB	ras homolog family member B	Cytoplasm	enzyme	6.81397e-05	2.79312e-06	down	3.93244	-3.93244	-1.97543
Glioblastoma Multiforme Signaling	1.18	0.044	-1.134	CDKN1A	cyclin-dependent kinase inhibitor 1A	Nucleus	kinase	0.000177018	2.76906e-05	up	2.34183	2.34183	1.22764
Glioblastoma Multiforme Signaling	1.18	0.044	-1.134	FGFR2	fibroblast growth factor receptor 2	Plasma Membrane	kinase	0.000292993	7.4204e-05	down	4.45302	-4.45302	-2.15478
Glioblastoma Multiforme Signaling	1.18	0.044	-1.134	WNT5A	Wnt family member 5A	Extracellular Space	cytokine	9.09658e-05	6.84293e-06	up	3.07702	3.07702	1.62154
TR/RXR Activation	1.17	0.051	NaN	UCP2	uncoupling protein 2	Cytoplasm	transporter	0.000212663	3.87543e-05	down	2.04574	-2.04574	-1.03262
TR/RXR Activation	1.17	0.051	NaN	GAB1	GRB2 associated binding protein 1	Cytoplasm	kinase	0.000120758	1.28231e-05	down	2.38756	-2.38756	-1.25554
TR/RXR Activation	1.17	0.051	NaN	FGFR2	fibroblast growth factor receptor 2	Plasma Membrane	kinase	0.000292993	7.4204e-05	down	4.45302	-4.45302	-2.15478
TR/RXR Activation	1.17	0.051	NaN	ME1	malic enzyme 1	Cytoplasm	enzyme	8.46898e-05	5.81387e-06	down	2.50435	-2.50435	-1.32443
TR/RXR Activation	1.17	0.051	NaN	THRB	thyroid hormone receptor beta	Nucleus	ligand-dependent nuclear receptor	0.000438312	0.000152593	down	3.65533	-3.65533	-1.87
CDK5 Signaling	1.15	0.0505	-2	PRKAR2B	protein kinase cAMP-dependent type II regulatory subunit beta	Cytoplasm	kinase	0.000487765	0.000185126	down	3.53523	-3.53523	-1.8218
CDK5 Signaling	1.15	0.0505	-2	EGR1	early growth response 1	Nucleus	transcription regulator	0.000910266	0.000531525	down	2.02311	-2.02311	-1.01658
CDK5 Signaling	1.15	0.0505	-2	ITGA2	integrin subunit alpha 2	Plasma Membrane	transmembrane receptor	0.000106124	9.61516e-06	up	4.46447	4.46447	2.15849
CDK5 Signaling	1.15	0.0505	-2	PPP2R1B	protein phosphatase 2 regulatory subunit A, beta	Plasma Membrane	phosphatase	0.00054298	0.000223565	down	3.20601	-3.20601	-1.68078
CDK5 Signaling	1.15	0.0505	-2	ADCY7	adenylate cyclase 7	Plasma Membrane	enzyme	0.000171656	2.62247e-05	down	2.13945	-2.13945	-1.09724
The Visual Cycle	1.14	0.1	NaN	DHRS3	dehydrogenase/reductase (SDR family) member 3	Cytoplasm	enzyme	5.50777e-05	1.38983e-06	down	2.98607	-2.98607	-1.57825
The Visual Cycle	1.14	0.1	NaN	RDH10	retinol dehydrogenase 10 (all-trans)	Nucleus	enzyme	0.00180195	0.00137543	down	3.43556	-3.43556	-1.78055
T Helper Cell Differentiation	1.13	0.0563	NaN	CD40	CD40 molecule	Plasma Membrane	transmembrane receptor	9.69248e-05	8.01981e-06	up	2.53917	2.53917	1.34436
T Helper Cell Differentiation	1.13	0.0563	NaN	IL6	interleukin 6	Extracellular Space	cytokine	3.65159e-05	2.68298e-07	up	2.78882	2.78882	1.47965
T Helper Cell Differentiation	1.13	0.0563	NaN	STAT1	signal transducer and activator of transcription 1	Nucleus	transcription regulator	0.000127302	1.44319e-05	down	2.48387	-2.48387	-1.31259
T Helper Cell Differentiation	1.13	0.0563	NaN	TNF	tumor necrosis factor	Extracellular Space	cytokine	0.000291147	7.31026e-05	up	2.74571	2.74571	1.45718
Triacylglycerol Biosynthesis	1.13	0.0682	NaN	ABHD5	abhydrolase domain containing 5	Cytoplasm	enzyme	0.000223981	4.29378e-05	down	2.45649	-2.45649	-1.2966
Triacylglycerol Biosynthesis	1.13	0.0682	NaN	LCLAT1	lysocardiolipin acyltransferase 1	Cytoplasm	enzyme	0.000563238	0.000238177	down	2.21825	-2.21825	-1.14942
Triacylglycerol Biosynthesis	1.13	0.0682	NaN	CRLS1	cardiolipin synthase 1	Cytoplasm	enzyme	9.24278e-05	7.1639e-06	down	2.05449	-2.05449	-1.03878
RANK Signaling in Osteoclasts	1.12	0.0495	-2	GAB1	GRB2 associated binding protein 1	Cytoplasm	kinase	0.000120758	1.28231e-05	down	2.38756	-2.38756	-1.25554
RANK Signaling in Osteoclasts	1.12	0.0495	-2	NFKBIE	NFKB inhibitor epsilon	Nucleus	transcription regulator	7.29755e-05	3.81911e-06	up	2.23963	2.23963	1.16326
RANK Signaling in Osteoclasts	1.12	0.0495	-2	MAP3K1	mitogen-activated protein kinase kinase kinase 1	Cytoplasm	kinase	0.000104164	9.08987e-06	down	2.99182	-2.99182	-1.58102
RANK Signaling in Osteoclasts	1.12	0.0495	-2	TAB2	TGF-beta activated kinase 1/MAP3K7 binding protein 2	Cytoplasm	other	7.07354e-05	3.22612e-06	down	2.16795	-2.16795	-1.11633
RANK Signaling in Osteoclasts	1.12	0.0495	-2	FGFR2	fibroblast growth factor receptor 2	Plasma Membrane	kinase	0.000292993	7.4204e-05	down	4.45302	-4.45302	-2.15478
CXCR4 Signaling	1.11	0.0424	-1.633	PLCB4	phospholipase C beta 4	Cytoplasm	enzyme	0.000577089	0.000248086	down	2.07794	-2.07794	-1.05515
CXCR4 Signaling	1.11	0.0424	-1.633	GAB1	GRB2 associated binding protein 1	Cytoplasm	kinase	0.000120758	1.28231e-05	down	2.38756	-2.38756	-1.25554
CXCR4 Signaling	1.11	0.0424	-1.633	RHOB	ras homolog family member B	Cytoplasm	enzyme	6.81397e-05	2.79312e-06	down	3.93244	-3.93244	-1.97543
CXCR4 Signaling	1.11	0.0424	-1.633	EGR1	early growth response 1	Nucleus	transcription regulator	0.000910266	0.000531525	down	2.02311	-2.02311	-1.01658
CXCR4 Signaling	1.11	0.0424	-1.633	FGFR2	fibroblast growth factor receptor 2	Plasma Membrane	kinase	0.000292993	7.4204e-05	down	4.45302	-4.45302	-2.15478
CXCR4 Signaling	1.11	0.0424	-1.633	ADCY7	adenylate cyclase 7	Plasma Membrane	enzyme	0.000171656	2.62247e-05	down	2.13945	-2.13945	-1.09724
CXCR4 Signaling	1.11	0.0424	-1.633	GNG12	G protein subunit gamma 12	Plasma Membrane	enzyme	0.000320542	8.8399e-05	down	3.05299	-3.05299	-1.61022
Role of MAPK Signaling in the Pathogenesis of Influenza	1.11	0.0556	NaN	PLA2G4A	phospholipase A2 group IVA	Cytoplasm	enzyme	0.000319621	8.78429e-05	up	2.0774	2.0774	1.05478
Role of MAPK Signaling in the Pathogenesis of Influenza	1.11	0.0556	NaN	CCL2	C-C motif chemokine ligand 2	Extracellular Space	cytokine	5.71384e-05	1.64325e-06	up	4.18932	4.18932	2.06672
Role of MAPK Signaling in the Pathogenesis of Influenza	1.11	0.0556	NaN	CCL5	C-C motif chemokine ligand 5	Extracellular Space	cytokine	0.000244253	5.08419e-05	up	3.69923	3.69923	1.88723
Role of MAPK Signaling in the Pathogenesis of Influenza	1.11	0.0556	NaN	TNF	tumor necrosis factor	Extracellular Space	cytokine	0.000291147	7.31026e-05	up	2.74571	2.74571	1.45718
UVA-Induced MAPK Signaling	1.11	0.049	-1.342	PLCB4	phospholipase C beta 4	Cytoplasm	enzyme	0.000577089	0.000248086	down	2.07794	-2.07794	-1.05515
UVA-Induced MAPK Signaling	1.11	0.049	-1.342	GAB1	GRB2 associated binding protein 1	Cytoplasm	kinase	0.000120758	1.28231e-05	down	2.38756	-2.38756	-1.25554
UVA-Induced MAPK Signaling	1.11	0.049	-1.342	FGFR2	fibroblast growth factor receptor 2	Plasma Membrane	kinase	0.000292993	7.4204e-05	down	4.45302	-4.45302	-2.15478
UVA-Induced MAPK Signaling	1.11	0.049	-1.342	RPS6KA5	ribosomal protein S6 kinase A5	Nucleus	kinase	0.000896053	0.000519236	up	2.57033	2.57033	1.36195
UVA-Induced MAPK Signaling	1.11	0.049	-1.342	STAT1	signal transducer and activator of transcription 1	Nucleus	transcription regulator	0.000127302	1.44319e-05	down	2.48387	-2.48387	-1.31259
Tryptophan Degradation III (Eukaryotic)	1.1	0.0952	NaN	KMO	kynurenine 3-monooxygenase (kynurenine 3-hydroxylase)	Cytoplasm	enzyme	0.000132	1.54366e-05	down	2.75964	-2.75964	-1.46448
Tryptophan Degradation III (Eukaryotic)	1.1	0.0952	NaN	HSD17B4	hydroxysteroid (17-beta) dehydrogenase 4	Cytoplasm	enzyme	3.99514e-05	3.42128e-07	down	2.01416	-2.01416	-1.01018
Inflammasome pathway	1.1	0.0952	NaN	CXCL8	C-X-C motif chemokine ligand 8	Extracellular Space	cytokine	4.70395e-05	7.41202e-07	up	6.01014	6.01014	2.5874
Inflammasome pathway	1.1	0.0952	NaN	NLRP3	NLR family, pyrin domain containing 3	Cytoplasm	other	0.000235207	4.68615e-05	up	3.66524	3.66524	1.87391
Ephrin B Signaling	1.1	0.0548	NaN	EPHB1	EPH receptor B1	Plasma Membrane	kinase	0.0001348	1.60689e-05	up	2.30644	2.30644	1.20567
Ephrin B Signaling	1.1	0.0548	NaN	RGS3	regulator of G-protein signaling 3	Nucleus	other	0.00146999	0.00106616	up	2.21155	2.21155	1.14506
Ephrin B Signaling	1.1	0.0548	NaN	VAV3	vav guanine nucleotide exchange factor 3	Extracellular Space	cytokine	9.63321e-05	7.8327e-06	down	8.02289	-8.02289	-3.00412
Ephrin B Signaling	1.1	0.0548	NaN	GNG12	G protein subunit gamma 12	Plasma Membrane	enzyme	0.000320542	8.8399e-05	down	3.05299	-3.05299	-1.61022
SAPK/JNK Signaling	1.08	0.0481	-1.342	GAB1	GRB2 associated binding protein 1	Cytoplasm	kinase	0.000120758	1.28231e-05	down	2.38756	-2.38756	-1.25554
SAPK/JNK Signaling	1.08	0.0481	-1.342	MAP3K1	mitogen-activated protein kinase kinase kinase 1	Cytoplasm	kinase	0.000104164	9.08987e-06	down	2.99182	-2.99182	-1.58102
SAPK/JNK Signaling	1.08	0.0481	-1.342	ZAK	sterile alpha motif and leucine zipper containing kinase AZK	Cytoplasm	kinase	4.9534e-05	9.30809e-07	down	3.37023	-3.37023	-1.75285
SAPK/JNK Signaling	1.08	0.0481	-1.342	FGFR2	fibroblast growth factor receptor 2	Plasma Membrane	kinase	0.000292993	7.4204e-05	down	4.45302	-4.45302	-2.15478
SAPK/JNK Signaling	1.08	0.0481	-1.342	MAP4K4	mitogen-activated protein kinase kinase kinase kinase 4	Cytoplasm	kinase	0.000136555	1.64327e-05	up	2.15776	2.15776	1.10954
Phospholipase C Signaling	1.07	0.038	1	HMOX1	heme oxygenase 1	Cytoplasm	enzyme	3.07978e-05	1.0198e-07	up	7.17615	7.17615	2.84321
Phospholipase C Signaling	1.07	0.038	1	PLA2G4A	phospholipase A2 group IVA	Cytoplasm	enzyme	0.000319621	8.78429e-05	up	2.0774	2.0774	1.05478
Phospholipase C Signaling	1.07	0.038	1	PLCB4	phospholipase C beta 4	Cytoplasm	enzyme	0.000577089	0.000248086	down	2.07794	-2.07794	-1.05515
Phospholipase C Signaling	1.07	0.038	1	RHOB	ras homolog family member B	Cytoplasm	enzyme	6.81397e-05	2.79312e-06	down	3.93244	-3.93244	-1.97543
Phospholipase C Signaling	1.07	0.038	1	MEF2D	myocyte enhancer factor 2D	Nucleus	transcription regulator	0.000102885	8.85955e-06	up	2.07063	2.07063	1.05007
Phospholipase C Signaling	1.07	0.038	1	ITGA2	integrin subunit alpha 2	Plasma Membrane	transmembrane receptor	0.000106124	9.61516e-06	up	4.46447	4.46447	2.15849
Phospholipase C Signaling	1.07	0.038	1	ADCY7	adenylate cyclase 7	Plasma Membrane	enzyme	0.000171656	2.62247e-05	down	2.13945	-2.13945	-1.09724
Phospholipase C Signaling	1.07	0.038	1	RAP1A	RAP1A, member of RAS oncogene family	Cytoplasm	enzyme	5.67199e-05	1.48871e-06	up	2.16819	2.16819	1.11649
Phospholipase C Signaling	1.07	0.038	1	GNG12	G protein subunit gamma 12	Plasma Membrane	enzyme	0.000320542	8.8399e-05	down	3.05299	-3.05299	-1.61022
Breast Cancer Regulation by Stathmin1	1.07	0.0394	NaN	PLCB4	phospholipase C beta 4	Cytoplasm	enzyme	0.000577089	0.000248086	down	2.07794	-2.07794	-1.05515
Breast Cancer Regulation by Stathmin1	1.07	0.0394	NaN	PRKAR2B	protein kinase cAMP-dependent type II regulatory subunit beta	Cytoplasm	kinase	0.000487765	0.000185126	down	3.53523	-3.53523	-1.8218
Breast Cancer Regulation by Stathmin1	1.07	0.0394	NaN	GAB1	GRB2 associated binding protein 1	Cytoplasm	kinase	0.000120758	1.28231e-05	down	2.38756	-2.38756	-1.25554
Breast Cancer Regulation by Stathmin1	1.07	0.0394	NaN	CDKN1A	cyclin-dependent kinase inhibitor 1A	Nucleus	kinase	0.000177018	2.76906e-05	up	2.34183	2.34183	1.22764
Breast Cancer Regulation by Stathmin1	1.07	0.0394	NaN	FGFR2	fibroblast growth factor receptor 2	Plasma Membrane	kinase	0.000292993	7.4204e-05	down	4.45302	-4.45302	-2.15478
Breast Cancer Regulation by Stathmin1	1.07	0.0394	NaN	PPP2R1B	protein phosphatase 2 regulatory subunit A, beta	Plasma Membrane	phosphatase	0.00054298	0.000223565	down	3.20601	-3.20601	-1.68078
Breast Cancer Regulation by Stathmin1	1.07	0.0394	NaN	ADCY7	adenylate cyclase 7	Plasma Membrane	enzyme	0.000171656	2.62247e-05	down	2.13945	-2.13945	-1.09724
Breast Cancer Regulation by Stathmin1	1.07	0.0394	NaN	GNG12	G protein subunit gamma 12	Plasma Membrane	enzyme	0.000320542	8.8399e-05	down	3.05299	-3.05299	-1.61022
Airway Inflammation in Asthma	1.06	0.25	NaN	TNF	tumor necrosis factor	Extracellular Space	cytokine	0.000291147	7.31026e-05	up	2.74571	2.74571	1.45718
Arsenate Detoxification I (Glutaredoxin)	1.06	0.25	NaN	PNP	purine nucleoside phosphorylase	Nucleus	enzyme	0.000136714	1.65212e-05	up	2.01143	2.01143	1.00822
Heme Degradation	1.06	0.25	NaN	HMOX1	heme oxygenase 1	Cytoplasm	enzyme	3.07978e-05	1.0198e-07	up	7.17615	7.17615	2.84321
PRPP Biosynthesis I	1.06	0.25	NaN	PRPS2	phosphoribosyl pyrophosphate synthetase 2	Cytoplasm	kinase	3.20466e-05	1.13433e-07	down	2.49178	-2.49178	-1.31718
Myo-inositol Biosynthesis	1.06	0.25	NaN	IMPA2	inositol monophosphatase 2	Cytoplasm	phosphatase	0.000179469	2.84106e-05	down	3.52874	-3.52874	-1.81915
Glycerol-3-phosphate Shuttle	1.06	0.25	NaN	GPD2	glycerol-3-phosphate dehydrogenase 2	Cytoplasm	enzyme	5.90349e-05	1.79976e-06	down	2.02677	-2.02677	-1.01918
Melatonin Degradation II	1.06	0.25	NaN	IL4I1	interleukin 4 induced 1	Cytoplasm	enzyme	6.88576e-05	2.98039e-06	up	3.48522	3.48522	1.80125
Arginine Degradation I (Arginase Pathway)	1.06	0.25	NaN	ARG2	arginase 2	Cytoplasm	enzyme	0.000291983	7.3746e-05	up	2.06061	2.06061	1.04307
Primary Immunodeficiency Signaling	1.04	0.0625	NaN	CD40	CD40 molecule	Plasma Membrane	transmembrane receptor	9.69248e-05	8.01981e-06	up	2.53917	2.53917	1.34436
Primary Immunodeficiency Signaling	1.04	0.0625	NaN	TAP1	transporter 1, ATP-binding cassette, sub-family B (MDR/TAP)	Cytoplasm	transporter	4.66557e-05	7.245e-07	up	2.08292	2.08292	1.05861
Primary Immunodeficiency Signaling	1.04	0.0625	NaN	UNG	uracil DNA glycosylase	Nucleus	enzyme	0.000545803	0.000225773	down	2.10693	-2.10693	-1.07514
Pyrimidine Deoxyribonucleotides De Novo Biosynthesis I	1.03	0.087	NaN	DUT	deoxyuridine triphosphatase	Nucleus	enzyme	0.000180774	2.89799e-05	down	3.33942	-3.33942	-1.7396
Pyrimidine Deoxyribonucleotides De Novo Biosynthesis I	1.03	0.087	NaN	AK4	adenylate kinase 4	Cytoplasm	kinase	0.000354553	0.000104528	down	2.32812	-2.32812	-1.21917
Putrescine Degradation III	1.03	0.087	NaN	ALDH1A1	aldehyde dehydrogenase 1 family member A1	Cytoplasm	enzyme	4.38315e-05	5.73166e-07	down	3.45275	-3.45275	-1.78775
Putrescine Degradation III	1.03	0.087	NaN	IL4I1	interleukin 4 induced 1	Cytoplasm	enzyme	6.88576e-05	2.98039e-06	up	3.48522	3.48522	1.80125
Dopamine Receptor Signaling	1.03	0.0519	NaN	PRKAR2B	protein kinase cAMP-dependent type II regulatory subunit beta	Cytoplasm	kinase	0.000487765	0.000185126	down	3.53523	-3.53523	-1.8218
Dopamine Receptor Signaling	1.03	0.0519	NaN	PPP2R1B	protein phosphatase 2 regulatory subunit A, beta	Plasma Membrane	phosphatase	0.00054298	0.000223565	down	3.20601	-3.20601	-1.68078
Dopamine Receptor Signaling	1.03	0.0519	NaN	ADCY7	adenylate cyclase 7	Plasma Membrane	enzyme	0.000171656	2.62247e-05	down	2.13945	-2.13945	-1.09724
Dopamine Receptor Signaling	1.03	0.0519	NaN	IL4I1	interleukin 4 induced 1	Cytoplasm	enzyme	6.88576e-05	2.98039e-06	up	3.48522	3.48522	1.80125
Chondroitin Sulfate Biosynthesis (Late Stages)	1.02	0.0612	NaN	CHST1	carbohydrate sulfotransferase 1	Cytoplasm	enzyme	0.00110681	0.000717112	up	3.40019	3.40019	1.76562
Chondroitin Sulfate Biosynthesis (Late Stages)	1.02	0.0612	NaN	CSGALNACT2	chondroitin sulfate N-acetylgalactosaminyltransferase 2	Cytoplasm	enzyme	0.000966498	0.000581025	up	2.06044	2.06044	1.04295
Chondroitin Sulfate Biosynthesis (Late Stages)	1.02	0.0612	NaN	CHST9	carbohydrate sulfotransferase 9	Cytoplasm	enzyme	0.000109102	1.01652e-05	down	3.82965	-3.82965	-1.93721
Tumoricidal Function of Hepatic Natural Killer Cells	1	0.0833	NaN	ICAM1	intercellular adhesion molecule 1	Plasma Membrane	transmembrane receptor	4.25833e-05	4.82261e-07	up	4.88337	4.88337	2.28788
Tumoricidal Function of Hepatic Natural Killer Cells	1	0.0833	NaN	SRGN	serglycin	Cytoplasm	other	0.000152117	2.0184e-05	up	2.12857	2.12857	1.08989
Human Embryonic Stem Cell Pluripotency	0.995	0.042	NaN	FZD8	frizzled class receptor 8	Plasma Membrane	G-protein coupled receptor	0.000607384	0.000270472	up	2.43015	2.43015	1.28104
Human Embryonic Stem Cell Pluripotency	0.995	0.042	NaN	GAB1	GRB2 associated binding protein 1	Cytoplasm	kinase	0.000120758	1.28231e-05	down	2.38756	-2.38756	-1.25554
Human Embryonic Stem Cell Pluripotency	0.995	0.042	NaN	S1PR1	sphingosine-1-phosphate receptor 1	Plasma Membrane	G-protein coupled receptor	1.48349e-06	3.38774e-10	down	7.79723	-7.79723	-2.96296
Human Embryonic Stem Cell Pluripotency	0.995	0.042	NaN	FGFR2	fibroblast growth factor receptor 2	Plasma Membrane	kinase	0.000292993	7.4204e-05	down	4.45302	-4.45302	-2.15478
Human Embryonic Stem Cell Pluripotency	0.995	0.042	NaN	INHBA	inhibin beta A	Extracellular Space	growth factor	6.18657e-05	2.29577e-06	up	3.71771	3.71771	1.89441
Human Embryonic Stem Cell Pluripotency	0.995	0.042	NaN	WNT5A	Wnt family member 5A	Extracellular Space	cytokine	9.09658e-05	6.84293e-06	up	3.07702	3.07702	1.62154
p53 Signaling	0.988	0.045	1	CCNG1	cyclin G1	Nucleus	other	5.23957e-05	1.25288e-06	down	2.53544	-2.53544	-1.34224
p53 Signaling	0.988	0.045	1	GAB1	GRB2 associated binding protein 1	Cytoplasm	kinase	0.000120758	1.28231e-05	down	2.38756	-2.38756	-1.25554
p53 Signaling	0.988	0.045	1	CDKN1A	cyclin-dependent kinase inhibitor 1A	Nucleus	kinase	0.000177018	2.76906e-05	up	2.34183	2.34183	1.22764
p53 Signaling	0.988	0.045	1	FGFR2	fibroblast growth factor receptor 2	Plasma Membrane	kinase	0.000292993	7.4204e-05	down	4.45302	-4.45302	-2.15478
p53 Signaling	0.988	0.045	1	HIPK2	homeodomain interacting protein kinase 2	Nucleus	kinase	4.76218e-05	8.20133e-07	down	3.90758	-3.90758	-1.96627
Role of JAK family kinases in IL-6-type Cytokine Signaling	0.973	0.08	NaN	IL6	interleukin 6	Extracellular Space	cytokine	3.65159e-05	2.68298e-07	up	2.78882	2.78882	1.47965
Role of JAK family kinases in IL-6-type Cytokine Signaling	0.973	0.08	NaN	STAT1	signal transducer and activator of transcription 1	Nucleus	transcription regulator	0.000127302	1.44319e-05	down	2.48387	-2.48387	-1.31259
Tryptophan Degradation X (Mammalian, via Tryptamine)	0.973	0.08	NaN	ALDH1A1	aldehyde dehydrogenase 1 family member A1	Cytoplasm	enzyme	4.38315e-05	5.73166e-07	down	3.45275	-3.45275	-1.78775
Tryptophan Degradation X (Mammalian, via Tryptamine)	0.973	0.08	NaN	IL4I1	interleukin 4 induced 1	Cytoplasm	enzyme	6.88576e-05	2.98039e-06	up	3.48522	3.48522	1.80125
Creatine-phosphate Biosynthesis	0.972	0.2	NaN	MAP4K4	mitogen-activated protein kinase kinase kinase kinase 4	Cytoplasm	kinase	0.000136555	1.64327e-05	up	2.15776	2.15776	1.10954
Tetrahydrofolate Salvage from 5,10-methenyltetrahydrofolate	0.972	0.2	NaN	MTHFD2L	methylenetetrahydrofolate dehydrogenase (NADP+ dependent) 2-like	Cytoplasm	enzyme	0.00025278	5.48636e-05	up	2.88445	2.88445	1.5283
IL-12 Signaling and Production in Macrophages	0.963	0.0411	NaN	TLR2	toll like receptor 2	Plasma Membrane	transmembrane receptor	8.09449e-05	5.23963e-06	up	4.16405	4.16405	2.05799
IL-12 Signaling and Production in Macrophages	0.963	0.0411	NaN	CD40	CD40 molecule	Plasma Membrane	transmembrane receptor	9.69248e-05	8.01981e-06	up	2.53917	2.53917	1.34436
IL-12 Signaling and Production in Macrophages	0.963	0.0411	NaN	GAB1	GRB2 associated binding protein 1	Cytoplasm	kinase	0.000120758	1.28231e-05	down	2.38756	-2.38756	-1.25554
IL-12 Signaling and Production in Macrophages	0.963	0.0411	NaN	FGFR2	fibroblast growth factor receptor 2	Plasma Membrane	kinase	0.000292993	7.4204e-05	down	4.45302	-4.45302	-2.15478
IL-12 Signaling and Production in Macrophages	0.963	0.0411	NaN	STAT1	signal transducer and activator of transcription 1	Nucleus	transcription regulator	0.000127302	1.44319e-05	down	2.48387	-2.48387	-1.31259
IL-12 Signaling and Production in Macrophages	0.963	0.0411	NaN	TNF	tumor necrosis factor	Extracellular Space	cytokine	0.000291147	7.31026e-05	up	2.74571	2.74571	1.45718
Docosahexaenoic Acid (DHA) Signaling	0.96	0.0577	NaN	GAB1	GRB2 associated binding protein 1	Cytoplasm	kinase	0.000120758	1.28231e-05	down	2.38756	-2.38756	-1.25554
Docosahexaenoic Acid (DHA) Signaling	0.96	0.0577	NaN	FGFR2	fibroblast growth factor receptor 2	Plasma Membrane	kinase	0.000292993	7.4204e-05	down	4.45302	-4.45302	-2.15478
Docosahexaenoic Acid (DHA) Signaling	0.96	0.0577	NaN	BCL2A1	BCL2 related protein A1	Cytoplasm	other	2.49541e-05	4.55887e-08	up	11.3611	11.3611	3.50603
Semaphorin Signaling in Neurons	0.941	0.0566	NaN	SEMA3A	semaphorin 3A	Extracellular Space	other	0.000519394	0.000207155	up	2.7446	2.7446	1.4566
Semaphorin Signaling in Neurons	0.941	0.0566	NaN	RHOB	ras homolog family member B	Cytoplasm	enzyme	6.81397e-05	2.79312e-06	down	3.93244	-3.93244	-1.97543
Semaphorin Signaling in Neurons	0.941	0.0566	NaN	SEMA7A	semaphorin 7A (John Milton Hagen blood group)	Plasma Membrane	transmembrane receptor	7.21903e-05	3.52387e-06	up	3.20441	3.20441	1.68006
Role of NFAT in Regulation of the Immune Response	0.935	0.0383	-1.342	RCAN1	regulator of calcineurin 1	Nucleus	transcription regulator	7.03519e-05	3.19708e-06	up	2.17179	2.17179	1.11888
Role of NFAT in Regulation of the Immune Response	0.935	0.0383	-1.342	PLCB4	phospholipase C beta 4	Cytoplasm	enzyme	0.000577089	0.000248086	down	2.07794	-2.07794	-1.05515
Role of NFAT in Regulation of the Immune Response	0.935	0.0383	-1.342	GAB1	GRB2 associated binding protein 1	Cytoplasm	kinase	0.000120758	1.28231e-05	down	2.38756	-2.38756	-1.25554
Role of NFAT in Regulation of the Immune Response	0.935	0.0383	-1.342	NFKBIE	NFKB inhibitor epsilon	Nucleus	transcription regulator	7.29755e-05	3.81911e-06	up	2.23963	2.23963	1.16326
Role of NFAT in Regulation of the Immune Response	0.935	0.0383	-1.342	MEF2D	myocyte enhancer factor 2D	Nucleus	transcription regulator	0.000102885	8.85955e-06	up	2.07063	2.07063	1.05007
Role of NFAT in Regulation of the Immune Response	0.935	0.0383	-1.342	FGFR2	fibroblast growth factor receptor 2	Plasma Membrane	kinase	0.000292993	7.4204e-05	down	4.45302	-4.45302	-2.15478
Role of NFAT in Regulation of the Immune Response	0.935	0.0383	-1.342	GNG12	G protein subunit gamma 12	Plasma Membrane	enzyme	0.000320542	8.8399e-05	down	3.05299	-3.05299	-1.61022
Integrin Signaling	0.928	0.0365	-1.134	ARHGAP26	Rho GTPase activating protein 26	Cytoplasm	other	0.000431776	0.000149348	up	2.01876	2.01876	1.01347
Integrin Signaling	0.928	0.0365	-1.134	GAB1	GRB2 associated binding protein 1	Cytoplasm	kinase	0.000120758	1.28231e-05	down	2.38756	-2.38756	-1.25554
Integrin Signaling	0.928	0.0365	-1.134	RHOB	ras homolog family member B	Cytoplasm	enzyme	6.81397e-05	2.79312e-06	down	3.93244	-3.93244	-1.97543
Integrin Signaling	0.928	0.0365	-1.134	ITGA2	integrin subunit alpha 2	Plasma Membrane	transmembrane receptor	0.000106124	9.61516e-06	up	4.46447	4.46447	2.15849
Integrin Signaling	0.928	0.0365	-1.134	TSPAN2	tetraspanin 2	Extracellular Space	other	7.55498e-05	4.17517e-06	down	2.36973	-2.36973	-1.24472
Integrin Signaling	0.928	0.0365	-1.134	FGFR2	fibroblast growth factor receptor 2	Plasma Membrane	kinase	0.000292993	7.4204e-05	down	4.45302	-4.45302	-2.15478
Integrin Signaling	0.928	0.0365	-1.134	ITGB6	integrin subunit beta 6	Plasma Membrane	other	0.000220499	4.13446e-05	down	2.73909	-2.73909	-1.4537
Integrin Signaling	0.928	0.0365	-1.134	RAP1A	RAP1A, member of RAS oncogene family	Cytoplasm	enzyme	5.67199e-05	1.48871e-06	up	2.16819	2.16819	1.11649
Small Cell Lung Cancer Signaling	0.927	0.0476	NaN	GAB1	GRB2 associated binding protein 1	Cytoplasm	kinase	0.000120758	1.28231e-05	down	2.38756	-2.38756	-1.25554
Small Cell Lung Cancer Signaling	0.927	0.0476	NaN	NFKBIE	NFKB inhibitor epsilon	Nucleus	transcription regulator	7.29755e-05	3.81911e-06	up	2.23963	2.23963	1.16326
Small Cell Lung Cancer Signaling	0.927	0.0476	NaN	FGFR2	fibroblast growth factor receptor 2	Plasma Membrane	kinase	0.000292993	7.4204e-05	down	4.45302	-4.45302	-2.15478
Small Cell Lung Cancer Signaling	0.927	0.0476	NaN	TRAF1	TNF receptor associated factor 1	Cytoplasm	other	7.2424e-05	3.63029e-06	up	5.55985	5.55985	2.47505
Unfolded protein response	0.923	0.0556	NaN	HSPA9	heat shock protein family A (Hsp70) member 9	Cytoplasm	other	5.12481e-05	1.15744e-06	down	2.64295	-2.64295	-1.40215
Unfolded protein response	0.923	0.0556	NaN	CD82	CD82 molecule	Plasma Membrane	other	0.000155574	2.11222e-05	up	2.66006	2.66006	1.41146
Unfolded protein response	0.923	0.0556	NaN	DNAJB9	DnaJ heat shock protein family (Hsp40) member B9	Nucleus	other	0.000310326	8.254e-05	up	2.37686	2.37686	1.24906
Rac Signaling	0.917	0.0427	-0.447	GAB1	GRB2 associated binding protein 1	Cytoplasm	kinase	0.000120758	1.28231e-05	down	2.38756	-2.38756	-1.25554
Rac Signaling	0.917	0.0427	-0.447	NCF2	neutrophil cytosolic factor 2	Cytoplasm	enzyme	0.000241371	4.9582e-05	up	2.83754	2.83754	1.50464
Rac Signaling	0.917	0.0427	-0.447	ITGA2	integrin subunit alpha 2	Plasma Membrane	transmembrane receptor	0.000106124	9.61516e-06	up	4.46447	4.46447	2.15849
Rac Signaling	0.917	0.0427	-0.447	MAP3K1	mitogen-activated protein kinase kinase kinase 1	Cytoplasm	kinase	0.000104164	9.08987e-06	down	2.99182	-2.99182	-1.58102
Rac Signaling	0.917	0.0427	-0.447	FGFR2	fibroblast growth factor receptor 2	Plasma Membrane	kinase	0.000292993	7.4204e-05	down	4.45302	-4.45302	-2.15478
NGF Signaling	0.917	0.0427	-0.447	GAB1	GRB2 associated binding protein 1	Cytoplasm	kinase	0.000120758	1.28231e-05	down	2.38756	-2.38756	-1.25554
NGF Signaling	0.917	0.0427	-0.447	MAP3K1	mitogen-activated protein kinase kinase kinase 1	Cytoplasm	kinase	0.000104164	9.08987e-06	down	2.99182	-2.99182	-1.58102
NGF Signaling	0.917	0.0427	-0.447	FGFR2	fibroblast growth factor receptor 2	Plasma Membrane	kinase	0.000292993	7.4204e-05	down	4.45302	-4.45302	-2.15478
NGF Signaling	0.917	0.0427	-0.447	RPS6KA5	ribosomal protein S6 kinase A5	Nucleus	kinase	0.000896053	0.000519236	up	2.57033	2.57033	1.36195
NGF Signaling	0.917	0.0427	-0.447	RAP1A	RAP1A, member of RAS oncogene family	Cytoplasm	enzyme	5.67199e-05	1.48871e-06	up	2.16819	2.16819	1.11649
FLT3 Signaling in Hematopoietic Progenitor Cells	0.913	0.0471	-1	GAB1	GRB2 associated binding protein 1	Cytoplasm	kinase	0.000120758	1.28231e-05	down	2.38756	-2.38756	-1.25554
FLT3 Signaling in Hematopoietic Progenitor Cells	0.913	0.0471	-1	FGFR2	fibroblast growth factor receptor 2	Plasma Membrane	kinase	0.000292993	7.4204e-05	down	4.45302	-4.45302	-2.15478
FLT3 Signaling in Hematopoietic Progenitor Cells	0.913	0.0471	-1	RPS6KA5	ribosomal protein S6 kinase A5	Nucleus	kinase	0.000896053	0.000519236	up	2.57033	2.57033	1.36195
FLT3 Signaling in Hematopoietic Progenitor Cells	0.913	0.0471	-1	STAT1	signal transducer and activator of transcription 1	Nucleus	transcription regulator	0.000127302	1.44319e-05	down	2.48387	-2.48387	-1.31259
GPCR-Mediated Nutrient Sensing in Enteroendocrine Cells	0.913	0.0471	NaN	PLCB4	phospholipase C beta 4	Cytoplasm	enzyme	0.000577089	0.000248086	down	2.07794	-2.07794	-1.05515
GPCR-Mediated Nutrient Sensing in Enteroendocrine Cells	0.913	0.0471	NaN	PRKAR2B	protein kinase cAMP-dependent type II regulatory subunit beta	Cytoplasm	kinase	0.000487765	0.000185126	down	3.53523	-3.53523	-1.8218
GPCR-Mediated Nutrient Sensing in Enteroendocrine Cells	0.913	0.0471	NaN	ADCY7	adenylate cyclase 7	Plasma Membrane	enzyme	0.000171656	2.62247e-05	down	2.13945	-2.13945	-1.09724
GPCR-Mediated Nutrient Sensing in Enteroendocrine Cells	0.913	0.0471	NaN	GNG12	G protein subunit gamma 12	Plasma Membrane	enzyme	0.000320542	8.8399e-05	down	3.05299	-3.05299	-1.61022
cAMP-mediated signaling	0.911	0.0362	-0.707	PRKAR2B	protein kinase cAMP-dependent type II regulatory subunit beta	Cytoplasm	kinase	0.000487765	0.000185126	down	3.53523	-3.53523	-1.8218
cAMP-mediated signaling	0.911	0.0362	-0.707	DUSP6	dual specificity phosphatase 6	Cytoplasm	phosphatase	4.05507e-05	3.60207e-07	up	4.36083	4.36083	2.1246
cAMP-mediated signaling	0.911	0.0362	-0.707	S1PR1	sphingosine-1-phosphate receptor 1	Plasma Membrane	G-protein coupled receptor	1.48349e-06	3.38774e-10	down	7.79723	-7.79723	-2.96296
cAMP-mediated signaling	0.911	0.0362	-0.707	RGS4	regulator of G-protein signaling 4	Cytoplasm	other	4.9534e-05	9.97018e-07	up	2.89909	2.89909	1.5356
cAMP-mediated signaling	0.911	0.0362	-0.707	ADORA2B	adenosine A2b receptor	Plasma Membrane	G-protein coupled receptor	0.000155574	2.11387e-05	up	2.26916	2.26916	1.18216
cAMP-mediated signaling	0.911	0.0362	-0.707	PTGER2	prostaglandin E receptor 2	Plasma Membrane	G-protein coupled receptor	0.000252601	5.47139e-05	down	2.17697	-2.17697	-1.12232
cAMP-mediated signaling	0.911	0.0362	-0.707	ADCY7	adenylate cyclase 7	Plasma Membrane	enzyme	0.000171656	2.62247e-05	down	2.13945	-2.13945	-1.09724
cAMP-mediated signaling	0.911	0.0362	-0.707	RAP1A	RAP1A, member of RAS oncogene family	Cytoplasm	enzyme	5.67199e-05	1.48871e-06	up	2.16819	2.16819	1.11649
Melanoma Signaling	0.906	0.0545	NaN	GAB1	GRB2 associated binding protein 1	Cytoplasm	kinase	0.000120758	1.28231e-05	down	2.38756	-2.38756	-1.25554
Melanoma Signaling	0.906	0.0545	NaN	CDKN1A	cyclin-dependent kinase inhibitor 1A	Nucleus	kinase	0.000177018	2.76906e-05	up	2.34183	2.34183	1.22764
Melanoma Signaling	0.906	0.0545	NaN	FGFR2	fibroblast growth factor receptor 2	Plasma Membrane	kinase	0.000292993	7.4204e-05	down	4.45302	-4.45302	-2.15478
Urea Cycle	0.898	0.167	NaN	ARG2	arginase 2	Cytoplasm	enzyme	0.000291983	7.3746e-05	up	2.06061	2.06061	1.04307
Chondroitin and Dermatan Biosynthesis	0.898	0.167	NaN	CSGALNACT2	chondroitin sulfate N-acetylgalactosaminyltransferase 2	Cytoplasm	enzyme	0.000966498	0.000581025	up	2.06044	2.06044	1.04295
Arginine Degradation VI (Arginase 2 Pathway)	0.898	0.167	NaN	ARG2	arginase 2	Cytoplasm	enzyme	0.000291983	7.3746e-05	up	2.06061	2.06061	1.04307
Glycerol Degradation I	0.898	0.167	NaN	GPD2	glycerol-3-phosphate dehydrogenase 2	Cytoplasm	enzyme	5.90349e-05	1.79976e-06	down	2.02677	-2.02677	-1.01918
Molybdenum Cofactor Biosynthesis	0.898	0.167	NaN	GPHN	gephyrin	Plasma Membrane	enzyme	0.000595076	0.000261477	down	2.00646	-2.00646	-1.00465
AMPK Signaling	0.882	0.037	-1.342	PRKAR2B	protein kinase cAMP-dependent type II regulatory subunit beta	Cytoplasm	kinase	0.000487765	0.000185126	down	3.53523	-3.53523	-1.8218
AMPK Signaling	0.882	0.037	-1.342	GAB1	GRB2 associated binding protein 1	Cytoplasm	kinase	0.000120758	1.28231e-05	down	2.38756	-2.38756	-1.25554
AMPK Signaling	0.882	0.037	-1.342	CDKN1A	cyclin-dependent kinase inhibitor 1A	Nucleus	kinase	0.000177018	2.76906e-05	up	2.34183	2.34183	1.22764
AMPK Signaling	0.882	0.037	-1.342	PRKAA1	protein kinase AMP-activated catalytic subunit alpha 1	Cytoplasm	kinase	0.00048552	0.000183941	down	2.44451	-2.44451	-1.28954
AMPK Signaling	0.882	0.037	-1.342	FGFR2	fibroblast growth factor receptor 2	Plasma Membrane	kinase	0.000292993	7.4204e-05	down	4.45302	-4.45302	-2.15478
AMPK Signaling	0.882	0.037	-1.342	AK4	adenylate kinase 4	Cytoplasm	kinase	0.000354553	0.000104528	down	2.32812	-2.32812	-1.21917
AMPK Signaling	0.882	0.037	-1.342	PPP2R1B	protein phosphatase 2 regulatory subunit A, beta	Plasma Membrane	phosphatase	0.00054298	0.000223565	down	3.20601	-3.20601	-1.68078
G Beta Gamma Signaling	0.874	0.0455	-1	PRKAR2B	protein kinase cAMP-dependent type II regulatory subunit beta	Cytoplasm	kinase	0.000487765	0.000185126	down	3.53523	-3.53523	-1.8218
G Beta Gamma Signaling	0.874	0.0455	-1	CAV2	caveolin 2	Plasma Membrane	other	0.000299487	7.77613e-05	down	2.2358	-2.2358	-1.16079
G Beta Gamma Signaling	0.874	0.0455	-1	HBEGF	heparin binding EGF like growth factor	Extracellular Space	growth factor	0.000324605	9.06211e-05	up	2.92802	2.92802	1.54993
G Beta Gamma Signaling	0.874	0.0455	-1	GNG12	G protein subunit gamma 12	Plasma Membrane	enzyme	0.000320542	8.8399e-05	down	3.05299	-3.05299	-1.61022
Wnt/Ca+ pathway	0.872	0.0526	NaN	FZD8	frizzled class receptor 8	Plasma Membrane	G-protein coupled receptor	0.000607384	0.000270472	up	2.43015	2.43015	1.28104
Wnt/Ca+ pathway	0.872	0.0526	NaN	PLCB4	phospholipase C beta 4	Cytoplasm	enzyme	0.000577089	0.000248086	down	2.07794	-2.07794	-1.05515
Wnt/Ca+ pathway	0.872	0.0526	NaN	WNT5A	Wnt family member 5A	Extracellular Space	cytokine	9.09658e-05	6.84293e-06	up	3.07702	3.07702	1.62154
Apoptosis Signaling	0.861	0.0449	NaN	NFKBIE	NFKB inhibitor epsilon	Nucleus	transcription regulator	7.29755e-05	3.81911e-06	up	2.23963	2.23963	1.16326
Apoptosis Signaling	0.861	0.0449	NaN	BCL2A1	BCL2 related protein A1	Cytoplasm	other	2.49541e-05	4.55887e-08	up	11.3611	11.3611	3.50603
Apoptosis Signaling	0.861	0.0449	NaN	TNF	tumor necrosis factor	Extracellular Space	cytokine	0.000291147	7.31026e-05	up	2.74571	2.74571	1.45718
Apoptosis Signaling	0.861	0.0449	NaN	MAP4K4	mitogen-activated protein kinase kinase kinase kinase 4	Cytoplasm	kinase	0.000136555	1.64327e-05	up	2.15776	2.15776	1.10954
Chondroitin Sulfate Biosynthesis	0.856	0.0517	NaN	CHST1	carbohydrate sulfotransferase 1	Cytoplasm	enzyme	0.00110681	0.000717112	up	3.40019	3.40019	1.76562
Chondroitin Sulfate Biosynthesis	0.856	0.0517	NaN	CSGALNACT2	chondroitin sulfate N-acetylgalactosaminyltransferase 2	Cytoplasm	enzyme	0.000966498	0.000581025	up	2.06044	2.06044	1.04295
Chondroitin Sulfate Biosynthesis	0.856	0.0517	NaN	CHST9	carbohydrate sulfotransferase 9	Cytoplasm	enzyme	0.000109102	1.01652e-05	down	3.82965	-3.82965	-1.93721
PDGF Signaling	0.848	0.0444	-2	GAB1	GRB2 associated binding protein 1	Cytoplasm	kinase	0.000120758	1.28231e-05	down	2.38756	-2.38756	-1.25554
PDGF Signaling	0.848	0.0444	-2	MAP3K1	mitogen-activated protein kinase kinase kinase 1	Cytoplasm	kinase	0.000104164	9.08987e-06	down	2.99182	-2.99182	-1.58102
PDGF Signaling	0.848	0.0444	-2	FGFR2	fibroblast growth factor receptor 2	Plasma Membrane	kinase	0.000292993	7.4204e-05	down	4.45302	-4.45302	-2.15478
PDGF Signaling	0.848	0.0444	-2	STAT1	signal transducer and activator of transcription 1	Nucleus	transcription regulator	0.000127302	1.44319e-05	down	2.48387	-2.48387	-1.31259
Sonic Hedgehog Signaling	0.842	0.0667	NaN	PRKAR2B	protein kinase cAMP-dependent type II regulatory subunit beta	Cytoplasm	kinase	0.000487765	0.000185126	down	3.53523	-3.53523	-1.8218
Sonic Hedgehog Signaling	0.842	0.0667	NaN	PTCH1	patched 1	Plasma Membrane	transmembrane receptor	0.000788746	0.000423282	down	2.08064	-2.08064	-1.05703
Phosphatidylcholine Biosynthesis I	0.835	0.143	NaN	CHPT1	choline phosphotransferase 1	Cytoplasm	enzyme	0.000497943	0.000191546	down	2.1177	-2.1177	-1.0825
Adenine and Adenosine Salvage III	0.835	0.143	NaN	PNP	purine nucleoside phosphorylase	Nucleus	enzyme	0.000136714	1.65212e-05	up	2.01143	2.01143	1.00822
Sperm Motility	0.83	0.04	-1.342	PLA2G4A	phospholipase A2 group IVA	Cytoplasm	enzyme	0.000319621	8.78429e-05	up	2.0774	2.0774	1.05478
Sperm Motility	0.83	0.04	-1.342	PLCB4	phospholipase C beta 4	Cytoplasm	enzyme	0.000577089	0.000248086	down	2.07794	-2.07794	-1.05515
Sperm Motility	0.83	0.04	-1.342	PRKAR2B	protein kinase cAMP-dependent type II regulatory subunit beta	Cytoplasm	kinase	0.000487765	0.000185126	down	3.53523	-3.53523	-1.8218
Sperm Motility	0.83	0.04	-1.342	TWF1	twinfilin actin binding protein 1	Cytoplasm	kinase	4.9534e-05	9.45398e-07	down	3.5115	-3.5115	-1.81209
Sperm Motility	0.83	0.04	-1.342	GUCY1B3	guanylate cyclase 1, soluble, beta 3	Cytoplasm	enzyme	0.000294466	7.54152e-05	down	2.03253	-2.03253	-1.02328
Induction of Apoptosis by HIV1	0.824	0.05	NaN	NFKBIE	NFKB inhibitor epsilon	Nucleus	transcription regulator	7.29755e-05	3.81911e-06	up	2.23963	2.23963	1.16326
Induction of Apoptosis by HIV1	0.824	0.05	NaN	TNF	tumor necrosis factor	Extracellular Space	cytokine	0.000291147	7.31026e-05	up	2.74571	2.74571	1.45718
Induction of Apoptosis by HIV1	0.824	0.05	NaN	TRAF1	TNF receptor associated factor 1	Cytoplasm	other	7.2424e-05	3.63029e-06	up	5.55985	5.55985	2.47505
Ephrin A Signaling	0.824	0.05	NaN	GAB1	GRB2 associated binding protein 1	Cytoplasm	kinase	0.000120758	1.28231e-05	down	2.38756	-2.38756	-1.25554
Ephrin A Signaling	0.824	0.05	NaN	VAV3	vav guanine nucleotide exchange factor 3	Extracellular Space	cytokine	9.63321e-05	7.8327e-06	down	8.02289	-8.02289	-3.00412
Ephrin A Signaling	0.824	0.05	NaN	FGFR2	fibroblast growth factor receptor 2	Plasma Membrane	kinase	0.000292993	7.4204e-05	down	4.45302	-4.45302	-2.15478
Reelin Signaling in Neurons	0.824	0.0435	NaN	NDEL1	nudE neurodevelopment protein 1 like 1	Nucleus	other	9.02543e-05	6.7397e-06	up	2.10114	2.10114	1.07117
Reelin Signaling in Neurons	0.824	0.0435	NaN	GAB1	GRB2 associated binding protein 1	Cytoplasm	kinase	0.000120758	1.28231e-05	down	2.38756	-2.38756	-1.25554
Reelin Signaling in Neurons	0.824	0.0435	NaN	ITGA2	integrin subunit alpha 2	Plasma Membrane	transmembrane receptor	0.000106124	9.61516e-06	up	4.46447	4.46447	2.15849
Reelin Signaling in Neurons	0.824	0.0435	NaN	FGFR2	fibroblast growth factor receptor 2	Plasma Membrane	kinase	0.000292993	7.4204e-05	down	4.45302	-4.45302	-2.15478
Death Receptor Signaling	0.824	0.0435	1	NFKBIE	NFKB inhibitor epsilon	Nucleus	transcription regulator	7.29755e-05	3.81911e-06	up	2.23963	2.23963	1.16326
Death Receptor Signaling	0.824	0.0435	1	TNF	tumor necrosis factor	Extracellular Space	cytokine	0.000291147	7.31026e-05	up	2.74571	2.74571	1.45718
Death Receptor Signaling	0.824	0.0435	1	MAP4K4	mitogen-activated protein kinase kinase kinase kinase 4	Cytoplasm	kinase	0.000136555	1.64327e-05	up	2.15776	2.15776	1.10954
Death Receptor Signaling	0.824	0.0435	1	ARHGDIB	Rho GDP dissociation inhibitor beta	Cytoplasm	enzyme	6.05334e-05	1.96135e-06	up	3.30009	3.30009	1.7225
4-1BB Signaling in T Lymphocytes	0.819	0.0645	NaN	NFKBIE	NFKB inhibitor epsilon	Nucleus	transcription regulator	7.29755e-05	3.81911e-06	up	2.23963	2.23963	1.16326
4-1BB Signaling in T Lymphocytes	0.819	0.0645	NaN	TRAF1	TNF receptor associated factor 1	Cytoplasm	other	7.2424e-05	3.63029e-06	up	5.55985	5.55985	2.47505
Dopamine-DARPP32 Feedback in cAMP Signaling	0.81	0.037	-1.342	PLCB4	phospholipase C beta 4	Cytoplasm	enzyme	0.000577089	0.000248086	down	2.07794	-2.07794	-1.05515
Dopamine-DARPP32 Feedback in cAMP Signaling	0.81	0.037	-1.342	PRKAR2B	protein kinase cAMP-dependent type II regulatory subunit beta	Cytoplasm	kinase	0.000487765	0.000185126	down	3.53523	-3.53523	-1.8218
Dopamine-DARPP32 Feedback in cAMP Signaling	0.81	0.037	-1.342	KCNJ16	potassium voltage-gated channel subfamily J member 16	Plasma Membrane	ion channel	6.27081e-05	2.40579e-06	down	3.12894	-3.12894	-1.64567
Dopamine-DARPP32 Feedback in cAMP Signaling	0.81	0.037	-1.342	PPP2R1B	protein phosphatase 2 regulatory subunit A, beta	Plasma Membrane	phosphatase	0.00054298	0.000223565	down	3.20601	-3.20601	-1.68078
Dopamine-DARPP32 Feedback in cAMP Signaling	0.81	0.037	-1.342	ADCY7	adenylate cyclase 7	Plasma Membrane	enzyme	0.000171656	2.62247e-05	down	2.13945	-2.13945	-1.09724
Dopamine-DARPP32 Feedback in cAMP Signaling	0.81	0.037	-1.342	GUCY1B3	guanylate cyclase 1, soluble, beta 3	Cytoplasm	enzyme	0.000294466	7.54152e-05	down	2.03253	-2.03253	-1.02328
PI3K Signaling in B Lymphocytes	0.8	0.0391	0.447	PLCB4	phospholipase C beta 4	Cytoplasm	enzyme	0.000577089	0.000248086	down	2.07794	-2.07794	-1.05515
PI3K Signaling in B Lymphocytes	0.8	0.0391	0.447	C3	complement component 3	Extracellular Space	peptidase	0.000166276	2.38974e-05	up	3.15758	3.15758	1.65882
PI3K Signaling in B Lymphocytes	0.8	0.0391	0.447	CD40	CD40 molecule	Plasma Membrane	transmembrane receptor	9.69248e-05	8.01981e-06	up	2.53917	2.53917	1.34436
PI3K Signaling in B Lymphocytes	0.8	0.0391	0.447	VAV3	vav guanine nucleotide exchange factor 3	Extracellular Space	cytokine	9.63321e-05	7.8327e-06	down	8.02289	-8.02289	-3.00412
PI3K Signaling in B Lymphocytes	0.8	0.0391	0.447	NFKBIE	NFKB inhibitor epsilon	Nucleus	transcription regulator	7.29755e-05	3.81911e-06	up	2.23963	2.23963	1.16326
Prostate Cancer Signaling	0.8	0.0426	NaN	GAB1	GRB2 associated binding protein 1	Cytoplasm	kinase	0.000120758	1.28231e-05	down	2.38756	-2.38756	-1.25554
Prostate Cancer Signaling	0.8	0.0426	NaN	NFKBIE	NFKB inhibitor epsilon	Nucleus	transcription regulator	7.29755e-05	3.81911e-06	up	2.23963	2.23963	1.16326
Prostate Cancer Signaling	0.8	0.0426	NaN	CDKN1A	cyclin-dependent kinase inhibitor 1A	Nucleus	kinase	0.000177018	2.76906e-05	up	2.34183	2.34183	1.22764
Prostate Cancer Signaling	0.8	0.0426	NaN	FGFR2	fibroblast growth factor receptor 2	Plasma Membrane	kinase	0.000292993	7.4204e-05	down	4.45302	-4.45302	-2.15478
G Protein Signaling Mediated by Tubby	0.798	0.0625	NaN	PLCB4	phospholipase C beta 4	Cytoplasm	enzyme	0.000577089	0.000248086	down	2.07794	-2.07794	-1.05515
G Protein Signaling Mediated by Tubby	0.798	0.0625	NaN	GNG12	G protein subunit gamma 12	Plasma Membrane	enzyme	0.000320542	8.8399e-05	down	3.05299	-3.05299	-1.61022
Pyrimidine Ribonucleotides Interconversion	0.798	0.0625	NaN	AK4	adenylate kinase 4	Cytoplasm	kinase	0.000354553	0.000104528	down	2.32812	-2.32812	-1.21917
Pyrimidine Ribonucleotides Interconversion	0.798	0.0625	NaN	ENTPD7	ectonucleoside triphosphate diphosphohydrolase 7	Cytoplasm	enzyme	7.29755e-05	3.76723e-06	up	2.43567	2.43567	1.28432
Phospholipases	0.795	0.0484	NaN	HMOX1	heme oxygenase 1	Cytoplasm	enzyme	3.07978e-05	1.0198e-07	up	7.17615	7.17615	2.84321
Phospholipases	0.795	0.0484	NaN	PLA2G4A	phospholipase A2 group IVA	Cytoplasm	enzyme	0.000319621	8.78429e-05	up	2.0774	2.0774	1.05478
Phospholipases	0.795	0.0484	NaN	PLCB4	phospholipase C beta 4	Cytoplasm	enzyme	0.000577089	0.000248086	down	2.07794	-2.07794	-1.05515
GNRH Signaling	0.791	0.0388	-2.236	PLCB4	phospholipase C beta 4	Cytoplasm	enzyme	0.000577089	0.000248086	down	2.07794	-2.07794	-1.05515
GNRH Signaling	0.791	0.0388	-2.236	PRKAR2B	protein kinase cAMP-dependent type II regulatory subunit beta	Cytoplasm	kinase	0.000487765	0.000185126	down	3.53523	-3.53523	-1.8218
GNRH Signaling	0.791	0.0388	-2.236	EGR1	early growth response 1	Nucleus	transcription regulator	0.000910266	0.000531525	down	2.02311	-2.02311	-1.01658
GNRH Signaling	0.791	0.0388	-2.236	MAP3K1	mitogen-activated protein kinase kinase kinase 1	Cytoplasm	kinase	0.000104164	9.08987e-06	down	2.99182	-2.99182	-1.58102
GNRH Signaling	0.791	0.0388	-2.236	ADCY7	adenylate cyclase 7	Plasma Membrane	enzyme	0.000171656	2.62247e-05	down	2.13945	-2.13945	-1.09724
Protein Kinase A Signaling	0.784	0.0308	-1	PLCB4	phospholipase C beta 4	Cytoplasm	enzyme	0.000577089	0.000248086	down	2.07794	-2.07794	-1.05515
Protein Kinase A Signaling	0.784	0.0308	-1	ADD3	adducin 3	Cytoplasm	other	4.76218e-05	8.21065e-07	down	2.36919	-2.36919	-1.24439
Protein Kinase A Signaling	0.784	0.0308	-1	PRKAR2B	protein kinase cAMP-dependent type II regulatory subunit beta	Cytoplasm	kinase	0.000487765	0.000185126	down	3.53523	-3.53523	-1.8218
Protein Kinase A Signaling	0.784	0.0308	-1	PTPN13	protein tyrosine phosphatase, non-receptor type 13	Cytoplasm	phosphatase	0.00056923	0.000241718	down	2.30453	-2.30453	-1.20447
Protein Kinase A Signaling	0.784	0.0308	-1	DUSP6	dual specificity phosphatase 6	Cytoplasm	phosphatase	4.05507e-05	3.60207e-07	up	4.36083	4.36083	2.1246
Protein Kinase A Signaling	0.784	0.0308	-1	NFKBIE	NFKB inhibitor epsilon	Nucleus	transcription regulator	7.29755e-05	3.81911e-06	up	2.23963	2.23963	1.16326
Protein Kinase A Signaling	0.784	0.0308	-1	MAP3K1	mitogen-activated protein kinase kinase kinase 1	Cytoplasm	kinase	0.000104164	9.08987e-06	down	2.99182	-2.99182	-1.58102
Protein Kinase A Signaling	0.784	0.0308	-1	PTCH1	patched 1	Plasma Membrane	transmembrane receptor	0.000788746	0.000423282	down	2.08064	-2.08064	-1.05703
Protein Kinase A Signaling	0.784	0.0308	-1	ADCY7	adenylate cyclase 7	Plasma Membrane	enzyme	0.000171656	2.62247e-05	down	2.13945	-2.13945	-1.09724
Protein Kinase A Signaling	0.784	0.0308	-1	PTPRR	protein tyrosine phosphatase, receptor type R	Plasma Membrane	phosphatase	0.000304557	7.97384e-05	up	2.32023	2.32023	1.21427
Protein Kinase A Signaling	0.784	0.0308	-1	RAP1A	RAP1A, member of RAS oncogene family	Cytoplasm	enzyme	5.67199e-05	1.48871e-06	up	2.16819	2.16819	1.11649
Protein Kinase A Signaling	0.784	0.0308	-1	GNG12	G protein subunit gamma 12	Plasma Membrane	enzyme	0.000320542	8.8399e-05	down	3.05299	-3.05299	-1.61022
Sphingosine and Sphingosine-1-phosphate Metabolism	0.782	0.125	NaN	SGPP2	sphingosine-1-phosphate phosphatase 2	Cytoplasm	phosphatase	0.000169763	2.54897e-05	up	2.02405	2.02405	1.01725
Histidine Degradation III	0.782	0.125	NaN	MTHFD2L	methylenetetrahydrofolate dehydrogenase (NADP+ dependent) 2-like	Cytoplasm	enzyme	0.00025278	5.48636e-05	up	2.88445	2.88445	1.5283
Citrulline Biosynthesis	0.782	0.125	NaN	ARG2	arginase 2	Cytoplasm	enzyme	0.000291983	7.3746e-05	up	2.06061	2.06061	1.04307
Superoxide Radicals Degradation	0.782	0.125	NaN	SOD2	superoxide dismutase 2, mitochondrial	Cytoplasm	enzyme	5.71384e-05	1.58904e-06	up	2.2088	2.2088	1.14326
Tryptophan Degradation to 2-amino-3-carboxymuconate Semialdehyde	0.782	0.125	NaN	KMO	kynurenine 3-monooxygenase (kynurenine 3-hydroxylase)	Cytoplasm	enzyme	0.000132	1.54366e-05	down	2.75964	-2.75964	-1.46448
Purine Ribonucleosides Degradation to Ribose-1-phosphate	0.782	0.125	NaN	PNP	purine nucleoside phosphorylase	Nucleus	enzyme	0.000136714	1.65212e-05	up	2.01143	2.01143	1.00822
Salvage Pathways of Pyrimidine Deoxyribonucleotides	0.782	0.125	NaN	CDA	cytidine deaminase	Nucleus	enzyme	0.000722094	0.000367313	up	2.01104	2.01104	1.00794
CCR3 Signaling in Eosinophils	0.781	0.0385	NaN	PLA2G4A	phospholipase A2 group IVA	Cytoplasm	enzyme	0.000319621	8.78429e-05	up	2.0774	2.0774	1.05478
CCR3 Signaling in Eosinophils	0.781	0.0385	NaN	PLCB4	phospholipase C beta 4	Cytoplasm	enzyme	0.000577089	0.000248086	down	2.07794	-2.07794	-1.05515
CCR3 Signaling in Eosinophils	0.781	0.0385	NaN	GAB1	GRB2 associated binding protein 1	Cytoplasm	kinase	0.000120758	1.28231e-05	down	2.38756	-2.38756	-1.25554
CCR3 Signaling in Eosinophils	0.781	0.0385	NaN	FGFR2	fibroblast growth factor receptor 2	Plasma Membrane	kinase	0.000292993	7.4204e-05	down	4.45302	-4.45302	-2.15478
CCR3 Signaling in Eosinophils	0.781	0.0385	NaN	GNG12	G protein subunit gamma 12	Plasma Membrane	enzyme	0.000320542	8.8399e-05	down	3.05299	-3.05299	-1.61022
PKCθ Signaling in T Lymphocytes	0.781	0.0385	-1.342	GAB1	GRB2 associated binding protein 1	Cytoplasm	kinase	0.000120758	1.28231e-05	down	2.38756	-2.38756	-1.25554
PKCθ Signaling in T Lymphocytes	0.781	0.0385	-1.342	VAV3	vav guanine nucleotide exchange factor 3	Extracellular Space	cytokine	9.63321e-05	7.8327e-06	down	8.02289	-8.02289	-3.00412
PKCθ Signaling in T Lymphocytes	0.781	0.0385	-1.342	NFKBIE	NFKB inhibitor epsilon	Nucleus	transcription regulator	7.29755e-05	3.81911e-06	up	2.23963	2.23963	1.16326
PKCθ Signaling in T Lymphocytes	0.781	0.0385	-1.342	MAP3K1	mitogen-activated protein kinase kinase kinase 1	Cytoplasm	kinase	0.000104164	9.08987e-06	down	2.99182	-2.99182	-1.58102
PKCθ Signaling in T Lymphocytes	0.781	0.0385	-1.342	FGFR2	fibroblast growth factor receptor 2	Plasma Membrane	kinase	0.000292993	7.4204e-05	down	4.45302	-4.45302	-2.15478
ERK5 Signaling	0.78	0.0476	NaN	GAB1	GRB2 associated binding protein 1	Cytoplasm	kinase	0.000120758	1.28231e-05	down	2.38756	-2.38756	-1.25554
ERK5 Signaling	0.78	0.0476	NaN	MEF2D	myocyte enhancer factor 2D	Nucleus	transcription regulator	0.000102885	8.85955e-06	up	2.07063	2.07063	1.05007
ERK5 Signaling	0.78	0.0476	NaN	RPS6KA5	ribosomal protein S6 kinase A5	Nucleus	kinase	0.000896053	0.000519236	up	2.57033	2.57033	1.36195
Aldosterone Signaling in Epithelial Cells	0.776	0.0361	NaN	PLCB4	phospholipase C beta 4	Cytoplasm	enzyme	0.000577089	0.000248086	down	2.07794	-2.07794	-1.05515
Aldosterone Signaling in Epithelial Cells	0.776	0.0361	NaN	GAB1	GRB2 associated binding protein 1	Cytoplasm	kinase	0.000120758	1.28231e-05	down	2.38756	-2.38756	-1.25554
Aldosterone Signaling in Epithelial Cells	0.776	0.0361	NaN	HSPA9	heat shock protein family A (Hsp70) member 9	Cytoplasm	other	5.12481e-05	1.15744e-06	down	2.64295	-2.64295	-1.40215
Aldosterone Signaling in Epithelial Cells	0.776	0.0361	NaN	FGFR2	fibroblast growth factor receptor 2	Plasma Membrane	kinase	0.000292993	7.4204e-05	down	4.45302	-4.45302	-2.15478
Aldosterone Signaling in Epithelial Cells	0.776	0.0361	NaN	DNAJB6	DnaJ heat shock protein family (Hsp40) member B6	Nucleus	transcription regulator	4.56082e-05	6.29335e-07	up	2.6549	2.6549	1.40866
Aldosterone Signaling in Epithelial Cells	0.776	0.0361	NaN	DNAJB9	DnaJ heat shock protein family (Hsp40) member B9	Nucleus	other	0.000310326	8.254e-05	up	2.37686	2.37686	1.24906
Huntington's Disease Signaling	0.764	0.0332	NaN	PLCB4	phospholipase C beta 4	Cytoplasm	enzyme	0.000577089	0.000248086	down	2.07794	-2.07794	-1.05515
Huntington's Disease Signaling	0.764	0.0332	NaN	GAB1	GRB2 associated binding protein 1	Cytoplasm	kinase	0.000120758	1.28231e-05	down	2.38756	-2.38756	-1.25554
Huntington's Disease Signaling	0.764	0.0332	NaN	HSPA9	heat shock protein family A (Hsp70) member 9	Cytoplasm	other	5.12481e-05	1.15744e-06	down	2.64295	-2.64295	-1.40215
Huntington's Disease Signaling	0.764	0.0332	NaN	FGFR2	fibroblast growth factor receptor 2	Plasma Membrane	kinase	0.000292993	7.4204e-05	down	4.45302	-4.45302	-2.15478
Huntington's Disease Signaling	0.764	0.0332	NaN	RCOR1	REST corepressor 1	Nucleus	transcription regulator	0.000130721	1.51497e-05	down	2.5425	-2.5425	-1.34625
Huntington's Disease Signaling	0.764	0.0332	NaN	SNAP25	synaptosome associated protein 25kDa	Plasma Membrane	transporter	0.000114304	1.12265e-05	down	2.84358	-2.84358	-1.50771
Huntington's Disease Signaling	0.764	0.0332	NaN	GNG12	G protein subunit gamma 12	Plasma Membrane	enzyme	0.000320542	8.8399e-05	down	3.05299	-3.05299	-1.61022
Huntington's Disease Signaling	0.764	0.0332	NaN	TAF9B	TATA-box binding protein associated factor 9b	Nucleus	transcription regulator	6.88576e-05	2.9817e-06	down	2.4706	-2.4706	-1.30486
Gap Junction Signaling	0.76	0.0357	NaN	PLCB4	phospholipase C beta 4	Cytoplasm	enzyme	0.000577089	0.000248086	down	2.07794	-2.07794	-1.05515
Gap Junction Signaling	0.76	0.0357	NaN	PRKAR2B	protein kinase cAMP-dependent type II regulatory subunit beta	Cytoplasm	kinase	0.000487765	0.000185126	down	3.53523	-3.53523	-1.8218
Gap Junction Signaling	0.76	0.0357	NaN	GAB1	GRB2 associated binding protein 1	Cytoplasm	kinase	0.000120758	1.28231e-05	down	2.38756	-2.38756	-1.25554
Gap Junction Signaling	0.76	0.0357	NaN	FGFR2	fibroblast growth factor receptor 2	Plasma Membrane	kinase	0.000292993	7.4204e-05	down	4.45302	-4.45302	-2.15478
Gap Junction Signaling	0.76	0.0357	NaN	ADCY7	adenylate cyclase 7	Plasma Membrane	enzyme	0.000171656	2.62247e-05	down	2.13945	-2.13945	-1.09724
Gap Junction Signaling	0.76	0.0357	NaN	GUCY1B3	guanylate cyclase 1, soluble, beta 3	Cytoplasm	enzyme	0.000294466	7.54152e-05	down	2.03253	-2.03253	-1.02328
TWEAK Signaling	0.756	0.0588	NaN	NFKBIE	NFKB inhibitor epsilon	Nucleus	transcription regulator	7.29755e-05	3.81911e-06	up	2.23963	2.23963	1.16326
TWEAK Signaling	0.756	0.0588	NaN	TRAF1	TNF receptor associated factor 1	Cytoplasm	other	7.2424e-05	3.63029e-06	up	5.55985	5.55985	2.47505
Inhibition of Angiogenesis by TSP1	0.756	0.0588	NaN	MMP9	matrix metallopeptidase 9	Extracellular Space	peptidase	0.000105861	9.4402e-06	up	5.58648	5.58648	2.48194
Inhibition of Angiogenesis by TSP1	0.756	0.0588	NaN	GUCY1B3	guanylate cyclase 1, soluble, beta 3	Cytoplasm	enzyme	0.000294466	7.54152e-05	down	2.03253	-2.03253	-1.02328
Pyrimidine Ribonucleotides De Novo Biosynthesis	0.756	0.0588	NaN	AK4	adenylate kinase 4	Cytoplasm	kinase	0.000354553	0.000104528	down	2.32812	-2.32812	-1.21917
Pyrimidine Ribonucleotides De Novo Biosynthesis	0.756	0.0588	NaN	ENTPD7	ectonucleoside triphosphate diphosphohydrolase 7	Cytoplasm	enzyme	7.29755e-05	3.76723e-06	up	2.43567	2.43567	1.28432
ErbB Signaling	0.755	0.0408	NaN	GAB1	GRB2 associated binding protein 1	Cytoplasm	kinase	0.000120758	1.28231e-05	down	2.38756	-2.38756	-1.25554
ErbB Signaling	0.755	0.0408	NaN	FGFR2	fibroblast growth factor receptor 2	Plasma Membrane	kinase	0.000292993	7.4204e-05	down	4.45302	-4.45302	-2.15478
ErbB Signaling	0.755	0.0408	NaN	HBEGF	heparin binding EGF like growth factor	Extracellular Space	growth factor	0.000324605	9.06211e-05	up	2.92802	2.92802	1.54993
ErbB Signaling	0.755	0.0408	NaN	AREG	amphiregulin	Extracellular Space	growth factor	0.00030687	8.06945e-05	up	2.63063	2.63063	1.39541
Thrombopoietin Signaling	0.752	0.0462	NaN	GAB1	GRB2 associated binding protein 1	Cytoplasm	kinase	0.000120758	1.28231e-05	down	2.38756	-2.38756	-1.25554
Thrombopoietin Signaling	0.752	0.0462	NaN	FGFR2	fibroblast growth factor receptor 2	Plasma Membrane	kinase	0.000292993	7.4204e-05	down	4.45302	-4.45302	-2.15478
Thrombopoietin Signaling	0.752	0.0462	NaN	STAT1	signal transducer and activator of transcription 1	Nucleus	transcription regulator	0.000127302	1.44319e-05	down	2.48387	-2.48387	-1.31259
CTLA4 Signaling in Cytotoxic T Lymphocytes	0.744	0.0404	NaN	AP1M2	adaptor related protein complex 1 mu 2 subunit	Cytoplasm	transporter	0.000337175	9.69023e-05	down	2.24649	-2.24649	-1.16768
CTLA4 Signaling in Cytotoxic T Lymphocytes	0.744	0.0404	NaN	GAB1	GRB2 associated binding protein 1	Cytoplasm	kinase	0.000120758	1.28231e-05	down	2.38756	-2.38756	-1.25554
CTLA4 Signaling in Cytotoxic T Lymphocytes	0.744	0.0404	NaN	FGFR2	fibroblast growth factor receptor 2	Plasma Membrane	kinase	0.000292993	7.4204e-05	down	4.45302	-4.45302	-2.15478
CTLA4 Signaling in Cytotoxic T Lymphocytes	0.744	0.0404	NaN	PPP2R1B	protein phosphatase 2 regulatory subunit A, beta	Plasma Membrane	phosphatase	0.00054298	0.000223565	down	3.20601	-3.20601	-1.68078
FAK Signaling	0.744	0.0404	NaN	ARHGAP26	Rho GTPase activating protein 26	Cytoplasm	other	0.000431776	0.000149348	up	2.01876	2.01876	1.01347
FAK Signaling	0.744	0.0404	NaN	GAB1	GRB2 associated binding protein 1	Cytoplasm	kinase	0.000120758	1.28231e-05	down	2.38756	-2.38756	-1.25554
FAK Signaling	0.744	0.0404	NaN	ITGA2	integrin subunit alpha 2	Plasma Membrane	transmembrane receptor	0.000106124	9.61516e-06	up	4.46447	4.46447	2.15849
FAK Signaling	0.744	0.0404	NaN	FGFR2	fibroblast growth factor receptor 2	Plasma Membrane	kinase	0.000292993	7.4204e-05	down	4.45302	-4.45302	-2.15478
Adipogenesis pathway	0.744	0.0373	NaN	FZD8	frizzled class receptor 8	Plasma Membrane	G-protein coupled receptor	0.000607384	0.000270472	up	2.43015	2.43015	1.28104
Adipogenesis pathway	0.744	0.0373	NaN	FGFR2	fibroblast growth factor receptor 2	Plasma Membrane	kinase	0.000292993	7.4204e-05	down	4.45302	-4.45302	-2.15478
Adipogenesis pathway	0.744	0.0373	NaN	TNF	tumor necrosis factor	Extracellular Space	cytokine	0.000291147	7.31026e-05	up	2.74571	2.74571	1.45718
Adipogenesis pathway	0.744	0.0373	NaN	WNT5A	Wnt family member 5A	Extracellular Space	cytokine	9.09658e-05	6.84293e-06	up	3.07702	3.07702	1.62154
Adipogenesis pathway	0.744	0.0373	NaN	FGF1	fibroblast growth factor 1	Extracellular Space	growth factor	0.000689416	0.000339749	up	2.7327	2.7327	1.45033
UVB-Induced MAPK Signaling	0.739	0.0455	NaN	GAB1	GRB2 associated binding protein 1	Cytoplasm	kinase	0.000120758	1.28231e-05	down	2.38756	-2.38756	-1.25554
UVB-Induced MAPK Signaling	0.739	0.0455	NaN	FGFR2	fibroblast growth factor receptor 2	Plasma Membrane	kinase	0.000292993	7.4204e-05	down	4.45302	-4.45302	-2.15478
UVB-Induced MAPK Signaling	0.739	0.0455	NaN	RPS6KA5	ribosomal protein S6 kinase A5	Nucleus	kinase	0.000896053	0.000519236	up	2.57033	2.57033	1.36195
Dopamine Degradation	0.737	0.0571	NaN	ALDH1A1	aldehyde dehydrogenase 1 family member A1	Cytoplasm	enzyme	4.38315e-05	5.73166e-07	down	3.45275	-3.45275	-1.78775
Dopamine Degradation	0.737	0.0571	NaN	IL4I1	interleukin 4 induced 1	Cytoplasm	enzyme	6.88576e-05	2.98039e-06	up	3.48522	3.48522	1.80125
Folate Transformations I	0.736	0.111	NaN	MTHFD2L	methylenetetrahydrofolate dehydrogenase (NADP+ dependent) 2-like	Cytoplasm	enzyme	0.00025278	5.48636e-05	up	2.88445	2.88445	1.5283
Cholecystokinin/Gastrin-mediated Signaling	0.723	0.0396	NaN	PLCB4	phospholipase C beta 4	Cytoplasm	enzyme	0.000577089	0.000248086	down	2.07794	-2.07794	-1.05515
Cholecystokinin/Gastrin-mediated Signaling	0.723	0.0396	NaN	RHOB	ras homolog family member B	Cytoplasm	enzyme	6.81397e-05	2.79312e-06	down	3.93244	-3.93244	-1.97543
Cholecystokinin/Gastrin-mediated Signaling	0.723	0.0396	NaN	MEF2D	myocyte enhancer factor 2D	Nucleus	transcription regulator	0.000102885	8.85955e-06	up	2.07063	2.07063	1.05007
Cholecystokinin/Gastrin-mediated Signaling	0.723	0.0396	NaN	TNF	tumor necrosis factor	Extracellular Space	cytokine	0.000291147	7.31026e-05	up	2.74571	2.74571	1.45718
PAK Signaling	0.723	0.0396	0	GAB1	GRB2 associated binding protein 1	Cytoplasm	kinase	0.000120758	1.28231e-05	down	2.38756	-2.38756	-1.25554
PAK Signaling	0.723	0.0396	0	ITGA2	integrin subunit alpha 2	Plasma Membrane	transmembrane receptor	0.000106124	9.61516e-06	up	4.46447	4.46447	2.15849
PAK Signaling	0.723	0.0396	0	FGFR2	fibroblast growth factor receptor 2	Plasma Membrane	kinase	0.000292993	7.4204e-05	down	4.45302	-4.45302	-2.15478
PAK Signaling	0.723	0.0396	0	TNF	tumor necrosis factor	Extracellular Space	cytokine	0.000291147	7.31026e-05	up	2.74571	2.74571	1.45718
Germ Cell-Sertoli Cell Junction Signaling	0.72	0.0347	NaN	GAB1	GRB2 associated binding protein 1	Cytoplasm	kinase	0.000120758	1.28231e-05	down	2.38756	-2.38756	-1.25554
Germ Cell-Sertoli Cell Junction Signaling	0.72	0.0347	NaN	RHOB	ras homolog family member B	Cytoplasm	enzyme	6.81397e-05	2.79312e-06	down	3.93244	-3.93244	-1.97543
Germ Cell-Sertoli Cell Junction Signaling	0.72	0.0347	NaN	ITGA2	integrin subunit alpha 2	Plasma Membrane	transmembrane receptor	0.000106124	9.61516e-06	up	4.46447	4.46447	2.15849
Germ Cell-Sertoli Cell Junction Signaling	0.72	0.0347	NaN	MAP3K1	mitogen-activated protein kinase kinase kinase 1	Cytoplasm	kinase	0.000104164	9.08987e-06	down	2.99182	-2.99182	-1.58102
Germ Cell-Sertoli Cell Junction Signaling	0.72	0.0347	NaN	FGFR2	fibroblast growth factor receptor 2	Plasma Membrane	kinase	0.000292993	7.4204e-05	down	4.45302	-4.45302	-2.15478
Germ Cell-Sertoli Cell Junction Signaling	0.72	0.0347	NaN	TNF	tumor necrosis factor	Extracellular Space	cytokine	0.000291147	7.31026e-05	up	2.74571	2.74571	1.45718
Virus Entry via Endocytic Pathways	0.713	0.0392	NaN	GAB1	GRB2 associated binding protein 1	Cytoplasm	kinase	0.000120758	1.28231e-05	down	2.38756	-2.38756	-1.25554
Virus Entry via Endocytic Pathways	0.713	0.0392	NaN	ITGA2	integrin subunit alpha 2	Plasma Membrane	transmembrane receptor	0.000106124	9.61516e-06	up	4.46447	4.46447	2.15849
Virus Entry via Endocytic Pathways	0.713	0.0392	NaN	FGFR2	fibroblast growth factor receptor 2	Plasma Membrane	kinase	0.000292993	7.4204e-05	down	4.45302	-4.45302	-2.15478
Virus Entry via Endocytic Pathways	0.713	0.0392	NaN	ITGB6	integrin subunit beta 6	Plasma Membrane	other	0.000220499	4.13446e-05	down	2.73909	-2.73909	-1.4537
Complement System	0.7	0.0541	NaN	C3	complement component 3	Extracellular Space	peptidase	0.000166276	2.38974e-05	up	3.15758	3.15758	1.65882
Complement System	0.7	0.0541	NaN	CFI	complement factor I	Extracellular Space	peptidase	0.000113272	1.09702e-05	down	2.57781	-2.57781	-1.36614
Aryl Hydrocarbon Receptor Signaling	0.691	0.0357	NaN	ALDH1A1	aldehyde dehydrogenase 1 family member A1	Cytoplasm	enzyme	4.38315e-05	5.73166e-07	down	3.45275	-3.45275	-1.78775
Aryl Hydrocarbon Receptor Signaling	0.691	0.0357	NaN	GSTA4	glutathione S-transferase alpha 4	Cytoplasm	enzyme	0.000411532	0.000137256	down	2.86343	-2.86343	-1.51774
Aryl Hydrocarbon Receptor Signaling	0.691	0.0357	NaN	CDKN1A	cyclin-dependent kinase inhibitor 1A	Nucleus	kinase	0.000177018	2.76906e-05	up	2.34183	2.34183	1.22764
Aryl Hydrocarbon Receptor Signaling	0.691	0.0357	NaN	IL6	interleukin 6	Extracellular Space	cytokine	3.65159e-05	2.68298e-07	up	2.78882	2.78882	1.47965
Aryl Hydrocarbon Receptor Signaling	0.691	0.0357	NaN	TNF	tumor necrosis factor	Extracellular Space	cytokine	0.000291147	7.31026e-05	up	2.74571	2.74571	1.45718
Sertoli Cell-Sertoli Cell Junction Signaling	0.682	0.0337	NaN	PRKAR2B	protein kinase cAMP-dependent type II regulatory subunit beta	Cytoplasm	kinase	0.000487765	0.000185126	down	3.53523	-3.53523	-1.8218
Sertoli Cell-Sertoli Cell Junction Signaling	0.682	0.0337	NaN	ITGA2	integrin subunit alpha 2	Plasma Membrane	transmembrane receptor	0.000106124	9.61516e-06	up	4.46447	4.46447	2.15849
Sertoli Cell-Sertoli Cell Junction Signaling	0.682	0.0337	NaN	MAP3K1	mitogen-activated protein kinase kinase kinase 1	Cytoplasm	kinase	0.000104164	9.08987e-06	down	2.99182	-2.99182	-1.58102
Sertoli Cell-Sertoli Cell Junction Signaling	0.682	0.0337	NaN	ZAK	sterile alpha motif and leucine zipper containing kinase AZK	Cytoplasm	kinase	4.9534e-05	9.30809e-07	down	3.37023	-3.37023	-1.75285
Sertoli Cell-Sertoli Cell Junction Signaling	0.682	0.0337	NaN	TNF	tumor necrosis factor	Extracellular Space	cytokine	0.000291147	7.31026e-05	up	2.74571	2.74571	1.45718
Sertoli Cell-Sertoli Cell Junction Signaling	0.682	0.0337	NaN	GUCY1B3	guanylate cyclase 1, soluble, beta 3	Cytoplasm	enzyme	0.000294466	7.54152e-05	down	2.03253	-2.03253	-1.02328
Caveolar-mediated Endocytosis Signaling	0.676	0.0423	NaN	ITGA2	integrin subunit alpha 2	Plasma Membrane	transmembrane receptor	0.000106124	9.61516e-06	up	4.46447	4.46447	2.15849
Caveolar-mediated Endocytosis Signaling	0.676	0.0423	NaN	COPB2	coatomer protein complex subunit beta 2	Cytoplasm	transporter	9.63321e-05	7.85242e-06	down	2.97235	-2.97235	-1.5716
Caveolar-mediated Endocytosis Signaling	0.676	0.0423	NaN	ITGB6	integrin subunit beta 6	Plasma Membrane	other	0.000220499	4.13446e-05	down	2.73909	-2.73909	-1.4537
Role of JAK1 and JAK3 in γc Cytokine Signaling	0.676	0.0423	NaN	GAB1	GRB2 associated binding protein 1	Cytoplasm	kinase	0.000120758	1.28231e-05	down	2.38756	-2.38756	-1.25554
Role of JAK1 and JAK3 in γc Cytokine Signaling	0.676	0.0423	NaN	FGFR2	fibroblast growth factor receptor 2	Plasma Membrane	kinase	0.000292993	7.4204e-05	down	4.45302	-4.45302	-2.15478
Role of JAK1 and JAK3 in γc Cytokine Signaling	0.676	0.0423	NaN	STAT1	signal transducer and activator of transcription 1	Nucleus	transcription regulator	0.000127302	1.44319e-05	down	2.48387	-2.48387	-1.31259
Chemokine Signaling	0.676	0.0423	NaN	PLCB4	phospholipase C beta 4	Cytoplasm	enzyme	0.000577089	0.000248086	down	2.07794	-2.07794	-1.05515
Chemokine Signaling	0.676	0.0423	NaN	CCL2	C-C motif chemokine ligand 2	Extracellular Space	cytokine	5.71384e-05	1.64325e-06	up	4.18932	4.18932	2.06672
Chemokine Signaling	0.676	0.0423	NaN	CCL5	C-C motif chemokine ligand 5	Extracellular Space	cytokine	0.000244253	5.08419e-05	up	3.69923	3.69923	1.88723
Mouse Embryonic Stem Cell Pluripotency	0.674	0.0377	-1	FZD8	frizzled class receptor 8	Plasma Membrane	G-protein coupled receptor	0.000607384	0.000270472	up	2.43015	2.43015	1.28104
Mouse Embryonic Stem Cell Pluripotency	0.674	0.0377	-1	ID1	inhibitor of DNA binding 1, HLH protein	Nucleus	transcription regulator	6.27081e-05	2.40082e-06	down	2.32483	-2.32483	-1.21713
Mouse Embryonic Stem Cell Pluripotency	0.674	0.0377	-1	GAB1	GRB2 associated binding protein 1	Cytoplasm	kinase	0.000120758	1.28231e-05	down	2.38756	-2.38756	-1.25554
Mouse Embryonic Stem Cell Pluripotency	0.674	0.0377	-1	FGFR2	fibroblast growth factor receptor 2	Plasma Membrane	kinase	0.000292993	7.4204e-05	down	4.45302	-4.45302	-2.15478
IGF-1 Signaling	0.674	0.0377	NaN	PRKAR2B	protein kinase cAMP-dependent type II regulatory subunit beta	Cytoplasm	kinase	0.000487765	0.000185126	down	3.53523	-3.53523	-1.8218
IGF-1 Signaling	0.674	0.0377	NaN	GAB1	GRB2 associated binding protein 1	Cytoplasm	kinase	0.000120758	1.28231e-05	down	2.38756	-2.38756	-1.25554
IGF-1 Signaling	0.674	0.0377	NaN	IGFBP3	insulin like growth factor binding protein 3	Extracellular Space	other	2.3646e-05	3.67681e-08	down	2.30432	-2.30432	-1.20434
IGF-1 Signaling	0.674	0.0377	NaN	FGFR2	fibroblast growth factor receptor 2	Plasma Membrane	kinase	0.000292993	7.4204e-05	down	4.45302	-4.45302	-2.15478
Netrin Signaling	0.666	0.0513	NaN	PRKAR2B	protein kinase cAMP-dependent type II regulatory subunit beta	Cytoplasm	kinase	0.000487765	0.000185126	down	3.53523	-3.53523	-1.8218
Netrin Signaling	0.666	0.0513	NaN	ENAH	enabled homolog (Drosophila)	Plasma Membrane	other	0.00010603	9.54714e-06	down	2.97451	-2.97451	-1.57265
Basal Cell Carcinoma Signaling	0.664	0.0417	NaN	FZD8	frizzled class receptor 8	Plasma Membrane	G-protein coupled receptor	0.000607384	0.000270472	up	2.43015	2.43015	1.28104
Basal Cell Carcinoma Signaling	0.664	0.0417	NaN	PTCH1	patched 1	Plasma Membrane	transmembrane receptor	0.000788746	0.000423282	down	2.08064	-2.08064	-1.05703
Basal Cell Carcinoma Signaling	0.664	0.0417	NaN	WNT5A	Wnt family member 5A	Extracellular Space	cytokine	9.09658e-05	6.84293e-06	up	3.07702	3.07702	1.62154
GPCR-Mediated Integration of Enteroendocrine Signaling Exemplified by an L Cell	0.664	0.0417	NaN	PLCB4	phospholipase C beta 4	Cytoplasm	enzyme	0.000577089	0.000248086	down	2.07794	-2.07794	-1.05515
GPCR-Mediated Integration of Enteroendocrine Signaling Exemplified by an L Cell	0.664	0.0417	NaN	PRKAR2B	protein kinase cAMP-dependent type II regulatory subunit beta	Cytoplasm	kinase	0.000487765	0.000185126	down	3.53523	-3.53523	-1.8218
GPCR-Mediated Integration of Enteroendocrine Signaling Exemplified by an L Cell	0.664	0.0417	NaN	ADCY7	adenylate cyclase 7	Plasma Membrane	enzyme	0.000171656	2.62247e-05	down	2.13945	-2.13945	-1.09724
Purine Nucleotides De Novo Biosynthesis II	0.658	0.0909	NaN	ADSS	adenylosuccinate synthase	Cytoplasm	enzyme	9.31449e-05	7.37034e-06	down	3.2606	-3.2606	-1.70514
Retinol Biosynthesis	0.649	0.05	NaN	DHRS3	dehydrogenase/reductase (SDR family) member 3	Cytoplasm	enzyme	5.50777e-05	1.38983e-06	down	2.98607	-2.98607	-1.57825
Retinol Biosynthesis	0.649	0.05	NaN	RDH10	retinol dehydrogenase 10 (all-trans)	Nucleus	enzyme	0.00180195	0.00137543	down	3.43556	-3.43556	-1.78055
Noradrenaline and Adrenaline Degradation	0.649	0.05	NaN	ALDH1A1	aldehyde dehydrogenase 1 family member A1	Cytoplasm	enzyme	4.38315e-05	5.73166e-07	down	3.45275	-3.45275	-1.78775
Noradrenaline and Adrenaline Degradation	0.649	0.05	NaN	IL4I1	interleukin 4 induced 1	Cytoplasm	enzyme	6.88576e-05	2.98039e-06	up	3.48522	3.48522	1.80125
LPS/IL-1 Mediated Inhibition of RXR Function	0.648	0.0317	NaN	CHST1	carbohydrate sulfotransferase 1	Cytoplasm	enzyme	0.00110681	0.000717112	up	3.40019	3.40019	1.76562
LPS/IL-1 Mediated Inhibition of RXR Function	0.648	0.0317	NaN	LY96	lymphocyte antigen 96	Plasma Membrane	transmembrane receptor	0.000399174	0.000129442	up	2.09875	2.09875	1.06953
LPS/IL-1 Mediated Inhibition of RXR Function	0.648	0.0317	NaN	ALDH1A1	aldehyde dehydrogenase 1 family member A1	Cytoplasm	enzyme	4.38315e-05	5.73166e-07	down	3.45275	-3.45275	-1.78775
LPS/IL-1 Mediated Inhibition of RXR Function	0.648	0.0317	NaN	GSTA4	glutathione S-transferase alpha 4	Cytoplasm	enzyme	0.000411532	0.000137256	down	2.86343	-2.86343	-1.51774
LPS/IL-1 Mediated Inhibition of RXR Function	0.648	0.0317	NaN	MAP3K1	mitogen-activated protein kinase kinase kinase 1	Cytoplasm	kinase	0.000104164	9.08987e-06	down	2.99182	-2.99182	-1.58102
LPS/IL-1 Mediated Inhibition of RXR Function	0.648	0.0317	NaN	TNF	tumor necrosis factor	Extracellular Space	cytokine	0.000291147	7.31026e-05	up	2.74571	2.74571	1.45718
LPS/IL-1 Mediated Inhibition of RXR Function	0.648	0.0317	NaN	IL4I1	interleukin 4 induced 1	Cytoplasm	enzyme	6.88576e-05	2.98039e-06	up	3.48522	3.48522	1.80125
T Cell Receptor Signaling	0.646	0.0367	NaN	GAB1	GRB2 associated binding protein 1	Cytoplasm	kinase	0.000120758	1.28231e-05	down	2.38756	-2.38756	-1.25554
T Cell Receptor Signaling	0.646	0.0367	NaN	VAV3	vav guanine nucleotide exchange factor 3	Extracellular Space	cytokine	9.63321e-05	7.8327e-06	down	8.02289	-8.02289	-3.00412
T Cell Receptor Signaling	0.646	0.0367	NaN	MAP3K1	mitogen-activated protein kinase kinase kinase 1	Cytoplasm	kinase	0.000104164	9.08987e-06	down	2.99182	-2.99182	-1.58102
T Cell Receptor Signaling	0.646	0.0367	NaN	FGFR2	fibroblast growth factor receptor 2	Plasma Membrane	kinase	0.000292993	7.4204e-05	down	4.45302	-4.45302	-2.15478
CREB Signaling in Neurons	0.64	0.0326	-2.236	PLCB4	phospholipase C beta 4	Cytoplasm	enzyme	0.000577089	0.000248086	down	2.07794	-2.07794	-1.05515
CREB Signaling in Neurons	0.64	0.0326	-2.236	PRKAR2B	protein kinase cAMP-dependent type II regulatory subunit beta	Cytoplasm	kinase	0.000487765	0.000185126	down	3.53523	-3.53523	-1.8218
CREB Signaling in Neurons	0.64	0.0326	-2.236	GAB1	GRB2 associated binding protein 1	Cytoplasm	kinase	0.000120758	1.28231e-05	down	2.38756	-2.38756	-1.25554
CREB Signaling in Neurons	0.64	0.0326	-2.236	FGFR2	fibroblast growth factor receptor 2	Plasma Membrane	kinase	0.000292993	7.4204e-05	down	4.45302	-4.45302	-2.15478
CREB Signaling in Neurons	0.64	0.0326	-2.236	ADCY7	adenylate cyclase 7	Plasma Membrane	enzyme	0.000171656	2.62247e-05	down	2.13945	-2.13945	-1.09724
CREB Signaling in Neurons	0.64	0.0326	-2.236	GNG12	G protein subunit gamma 12	Plasma Membrane	enzyme	0.000320542	8.8399e-05	down	3.05299	-3.05299	-1.61022
Amyotrophic Lateral Sclerosis Signaling	0.628	0.036	NaN	GAB1	GRB2 associated binding protein 1	Cytoplasm	kinase	0.000120758	1.28231e-05	down	2.38756	-2.38756	-1.25554
Amyotrophic Lateral Sclerosis Signaling	0.628	0.036	NaN	NEFL	neurofilament, light polypeptide	Cytoplasm	other	0.00012962	1.49185e-05	down	2.57733	-2.57733	-1.36588
Amyotrophic Lateral Sclerosis Signaling	0.628	0.036	NaN	VEGFC	vascular endothelial growth factor C	Extracellular Space	growth factor	4.25833e-05	4.70028e-07	up	2.6596	2.6596	1.41121
Amyotrophic Lateral Sclerosis Signaling	0.628	0.036	NaN	FGFR2	fibroblast growth factor receptor 2	Plasma Membrane	kinase	0.000292993	7.4204e-05	down	4.45302	-4.45302	-2.15478
Glutaryl-CoA Degradation	0.625	0.0833	NaN	HSD17B4	hydroxysteroid (17-beta) dehydrogenase 4	Cytoplasm	enzyme	3.99514e-05	3.42128e-07	down	2.01416	-2.01416	-1.01018
GDNF Family Ligand-Receptor Interactions	0.619	0.0395	NaN	ARTN	artemin	Extracellular Space	growth factor	0.000206984	3.7069e-05	down	2.07866	-2.07866	-1.05565
GDNF Family Ligand-Receptor Interactions	0.619	0.0395	NaN	GAB1	GRB2 associated binding protein 1	Cytoplasm	kinase	0.000120758	1.28231e-05	down	2.38756	-2.38756	-1.25554
GDNF Family Ligand-Receptor Interactions	0.619	0.0395	NaN	FGFR2	fibroblast growth factor receptor 2	Plasma Membrane	kinase	0.000292993	7.4204e-05	down	4.45302	-4.45302	-2.15478
Neurotrophin/TRK Signaling	0.619	0.0395	NaN	GAB1	GRB2 associated binding protein 1	Cytoplasm	kinase	0.000120758	1.28231e-05	down	2.38756	-2.38756	-1.25554
Neurotrophin/TRK Signaling	0.619	0.0395	NaN	SPRY2	sprouty RTK signaling antagonist 2	Plasma Membrane	other	0.000410306	0.000136093	up	2.82721	2.82721	1.49938
Neurotrophin/TRK Signaling	0.619	0.0395	NaN	FGFR2	fibroblast growth factor receptor 2	Plasma Membrane	kinase	0.000292993	7.4204e-05	down	4.45302	-4.45302	-2.15478
Paxillin Signaling	0.61	0.0354	NaN	GAB1	GRB2 associated binding protein 1	Cytoplasm	kinase	0.000120758	1.28231e-05	down	2.38756	-2.38756	-1.25554
Paxillin Signaling	0.61	0.0354	NaN	ITGA2	integrin subunit alpha 2	Plasma Membrane	transmembrane receptor	0.000106124	9.61516e-06	up	4.46447	4.46447	2.15849
Paxillin Signaling	0.61	0.0354	NaN	FGFR2	fibroblast growth factor receptor 2	Plasma Membrane	kinase	0.000292993	7.4204e-05	down	4.45302	-4.45302	-2.15478
Paxillin Signaling	0.61	0.0354	NaN	ITGB6	integrin subunit beta 6	Plasma Membrane	other	0.000220499	4.13446e-05	down	2.73909	-2.73909	-1.4537
Angiopoietin Signaling	0.608	0.039	NaN	GAB1	GRB2 associated binding protein 1	Cytoplasm	kinase	0.000120758	1.28231e-05	down	2.38756	-2.38756	-1.25554
Angiopoietin Signaling	0.608	0.039	NaN	NFKBIE	NFKB inhibitor epsilon	Nucleus	transcription regulator	7.29755e-05	3.81911e-06	up	2.23963	2.23963	1.16326
Angiopoietin Signaling	0.608	0.039	NaN	FGFR2	fibroblast growth factor receptor 2	Plasma Membrane	kinase	0.000292993	7.4204e-05	down	4.45302	-4.45302	-2.15478
Estrogen-Dependent Breast Cancer Signaling	0.608	0.039	NaN	GAB1	GRB2 associated binding protein 1	Cytoplasm	kinase	0.000120758	1.28231e-05	down	2.38756	-2.38756	-1.25554
Estrogen-Dependent Breast Cancer Signaling	0.608	0.039	NaN	FGFR2	fibroblast growth factor receptor 2	Plasma Membrane	kinase	0.000292993	7.4204e-05	down	4.45302	-4.45302	-2.15478
Estrogen-Dependent Breast Cancer Signaling	0.608	0.039	NaN	HSD17B4	hydroxysteroid (17-beta) dehydrogenase 4	Cytoplasm	enzyme	3.99514e-05	3.42128e-07	down	2.01416	-2.01416	-1.01018
Actin Cytoskeleton Signaling	0.605	0.0307	-1.342	GAB1	GRB2 associated binding protein 1	Cytoplasm	kinase	0.000120758	1.28231e-05	down	2.38756	-2.38756	-1.25554
Actin Cytoskeleton Signaling	0.605	0.0307	-1.342	VAV3	vav guanine nucleotide exchange factor 3	Extracellular Space	cytokine	9.63321e-05	7.8327e-06	down	8.02289	-8.02289	-3.00412
Actin Cytoskeleton Signaling	0.605	0.0307	-1.342	ITGA2	integrin subunit alpha 2	Plasma Membrane	transmembrane receptor	0.000106124	9.61516e-06	up	4.46447	4.46447	2.15849
Actin Cytoskeleton Signaling	0.605	0.0307	-1.342	FGFR2	fibroblast growth factor receptor 2	Plasma Membrane	kinase	0.000292993	7.4204e-05	down	4.45302	-4.45302	-2.15478
Actin Cytoskeleton Signaling	0.605	0.0307	-1.342	GNG12	G protein subunit gamma 12	Plasma Membrane	enzyme	0.000320542	8.8399e-05	down	3.05299	-3.05299	-1.61022
Actin Cytoskeleton Signaling	0.605	0.0307	-1.342	FGF1	fibroblast growth factor 1	Extracellular Space	growth factor	0.000689416	0.000339749	up	2.7327	2.7327	1.45033
Actin Cytoskeleton Signaling	0.605	0.0307	-1.342	FGF5	fibroblast growth factor 5	Extracellular Space	growth factor	3.65159e-05	2.83522e-07	up	3.22383	3.22383	1.68878
Role of p14/p19ARF in Tumor Suppression	0.604	0.0465	NaN	GAB1	GRB2 associated binding protein 1	Cytoplasm	kinase	0.000120758	1.28231e-05	down	2.38756	-2.38756	-1.25554
Role of p14/p19ARF in Tumor Suppression	0.604	0.0465	NaN	FGFR2	fibroblast growth factor receptor 2	Plasma Membrane	kinase	0.000292993	7.4204e-05	down	4.45302	-4.45302	-2.15478
Serotonin Receptor Signaling	0.604	0.0465	NaN	ADCY7	adenylate cyclase 7	Plasma Membrane	enzyme	0.000171656	2.62247e-05	down	2.13945	-2.13945	-1.09724
Serotonin Receptor Signaling	0.604	0.0465	NaN	IL4I1	interleukin 4 induced 1	Cytoplasm	enzyme	6.88576e-05	2.98039e-06	up	3.48522	3.48522	1.80125
Neuropathic Pain Signaling In Dorsal Horn Neurons	0.602	0.0351	-2	PLCB4	phospholipase C beta 4	Cytoplasm	enzyme	0.000577089	0.000248086	down	2.07794	-2.07794	-1.05515
Neuropathic Pain Signaling In Dorsal Horn Neurons	0.602	0.0351	-2	PRKAR2B	protein kinase cAMP-dependent type II regulatory subunit beta	Cytoplasm	kinase	0.000487765	0.000185126	down	3.53523	-3.53523	-1.8218
Neuropathic Pain Signaling In Dorsal Horn Neurons	0.602	0.0351	-2	GAB1	GRB2 associated binding protein 1	Cytoplasm	kinase	0.000120758	1.28231e-05	down	2.38756	-2.38756	-1.25554
Neuropathic Pain Signaling In Dorsal Horn Neurons	0.602	0.0351	-2	FGFR2	fibroblast growth factor receptor 2	Plasma Membrane	kinase	0.000292993	7.4204e-05	down	4.45302	-4.45302	-2.15478
Bile Acid Biosynthesis, Neutral Pathway	0.595	0.0769	NaN	AMACR	alpha-methylacyl-CoA racemase	Cytoplasm	enzyme	0.000457031	0.000164694	down	2.48248	-2.48248	-1.31178
Erythropoietin Signaling	0.588	0.038	NaN	GAB1	GRB2 associated binding protein 1	Cytoplasm	kinase	0.000120758	1.28231e-05	down	2.38756	-2.38756	-1.25554
Erythropoietin Signaling	0.588	0.038	NaN	NFKBIE	NFKB inhibitor epsilon	Nucleus	transcription regulator	7.29755e-05	3.81911e-06	up	2.23963	2.23963	1.16326
Erythropoietin Signaling	0.588	0.038	NaN	FGFR2	fibroblast growth factor receptor 2	Plasma Membrane	kinase	0.000292993	7.4204e-05	down	4.45302	-4.45302	-2.15478
Regulation of IL-2 Expression in Activated and Anergic T Lymphocytes	0.588	0.038	NaN	VAV3	vav guanine nucleotide exchange factor 3	Extracellular Space	cytokine	9.63321e-05	7.8327e-06	down	8.02289	-8.02289	-3.00412
Regulation of IL-2 Expression in Activated and Anergic T Lymphocytes	0.588	0.038	NaN	NFKBIE	NFKB inhibitor epsilon	Nucleus	transcription regulator	7.29755e-05	3.81911e-06	up	2.23963	2.23963	1.16326
Regulation of IL-2 Expression in Activated and Anergic T Lymphocytes	0.588	0.038	NaN	MAP3K1	mitogen-activated protein kinase kinase kinase 1	Cytoplasm	kinase	0.000104164	9.08987e-06	down	2.99182	-2.99182	-1.58102
Macropinocytosis Signaling	0.568	0.037	NaN	GAB1	GRB2 associated binding protein 1	Cytoplasm	kinase	0.000120758	1.28231e-05	down	2.38756	-2.38756	-1.25554
Macropinocytosis Signaling	0.568	0.037	NaN	FGFR2	fibroblast growth factor receptor 2	Plasma Membrane	kinase	0.000292993	7.4204e-05	down	4.45302	-4.45302	-2.15478
Macropinocytosis Signaling	0.568	0.037	NaN	ITGB6	integrin subunit beta 6	Plasma Membrane	other	0.000220499	4.13446e-05	down	2.73909	-2.73909	-1.4537
Superpathway of Citrulline Metabolism	0.567	0.0714	NaN	ARG2	arginase 2	Cytoplasm	enzyme	0.000291983	7.3746e-05	up	2.06061	2.06061	1.04307
Phenylalanine Degradation IV (Mammalian, via Side Chain)	0.567	0.0714	NaN	IL4I1	interleukin 4 induced 1	Cytoplasm	enzyme	6.88576e-05	2.98039e-06	up	3.48522	3.48522	1.80125
Regulation of eIF4 and p70S6K Signaling	0.563	0.0318	0	GAB1	GRB2 associated binding protein 1	Cytoplasm	kinase	0.000120758	1.28231e-05	down	2.38756	-2.38756	-1.25554
Regulation of eIF4 and p70S6K Signaling	0.563	0.0318	0	ITGA2	integrin subunit alpha 2	Plasma Membrane	transmembrane receptor	0.000106124	9.61516e-06	up	4.46447	4.46447	2.15849
Regulation of eIF4 and p70S6K Signaling	0.563	0.0318	0	FGFR2	fibroblast growth factor receptor 2	Plasma Membrane	kinase	0.000292993	7.4204e-05	down	4.45302	-4.45302	-2.15478
Regulation of eIF4 and p70S6K Signaling	0.563	0.0318	0	PPP2R1B	protein phosphatase 2 regulatory subunit A, beta	Plasma Membrane	phosphatase	0.00054298	0.000223565	down	3.20601	-3.20601	-1.68078
Regulation of eIF4 and p70S6K Signaling	0.563	0.0318	0	RPSA	ribosomal protein SA	Cytoplasm	translation regulator	4.9534e-05	1.00921e-06	up	4.16121	4.16121	2.057
Role of Oct4 in Mammalian Embryonic Stem Cell Pluripotency	0.562	0.0435	NaN	JARID2	jumonji and AT-rich interaction domain containing 2	Nucleus	transcription regulator	0.000292993	7.42951e-05	up	2.01143	2.01143	1.00822
Role of Oct4 in Mammalian Embryonic Stem Cell Pluripotency	0.562	0.0435	NaN	NR2F6	nuclear receptor subfamily 2 group F member 6	Nucleus	ligand-dependent nuclear receptor	6.05334e-05	2.06189e-06	down	2.2978	-2.2978	-1.20026
PTEN Signaling	0.561	0.0336	1	CDKN1A	cyclin-dependent kinase inhibitor 1A	Nucleus	kinase	0.000177018	2.76906e-05	up	2.34183	2.34183	1.22764
PTEN Signaling	0.561	0.0336	1	ITGA2	integrin subunit alpha 2	Plasma Membrane	transmembrane receptor	0.000106124	9.61516e-06	up	4.46447	4.46447	2.15849
PTEN Signaling	0.561	0.0336	1	FGFR2	fibroblast growth factor receptor 2	Plasma Membrane	kinase	0.000292993	7.4204e-05	down	4.45302	-4.45302	-2.15478
PTEN Signaling	0.561	0.0336	1	CNKSR3	CNKSR family member 3	Plasma Membrane	kinase	0.000104812	9.19111e-06	down	2.05759	-2.05759	-1.04095
Clathrin-mediated Endocytosis Signaling	0.557	0.0305	NaN	GAB1	GRB2 associated binding protein 1	Cytoplasm	kinase	0.000120758	1.28231e-05	down	2.38756	-2.38756	-1.25554
Clathrin-mediated Endocytosis Signaling	0.557	0.0305	NaN	VEGFC	vascular endothelial growth factor C	Extracellular Space	growth factor	4.25833e-05	4.70028e-07	up	2.6596	2.6596	1.41121
Clathrin-mediated Endocytosis Signaling	0.557	0.0305	NaN	FGFR2	fibroblast growth factor receptor 2	Plasma Membrane	kinase	0.000292993	7.4204e-05	down	4.45302	-4.45302	-2.15478
Clathrin-mediated Endocytosis Signaling	0.557	0.0305	NaN	ITGB6	integrin subunit beta 6	Plasma Membrane	other	0.000220499	4.13446e-05	down	2.73909	-2.73909	-1.4537
Clathrin-mediated Endocytosis Signaling	0.557	0.0305	NaN	FGF1	fibroblast growth factor 1	Extracellular Space	growth factor	0.000689416	0.000339749	up	2.7327	2.7327	1.45033
Clathrin-mediated Endocytosis Signaling	0.557	0.0305	NaN	FGF5	fibroblast growth factor 5	Extracellular Space	growth factor	3.65159e-05	2.83522e-07	up	3.22383	3.22383	1.68878
iCOS-iCOSL Signaling in T Helper Cells	0.553	0.0333	NaN	CD40	CD40 molecule	Plasma Membrane	transmembrane receptor	9.69248e-05	8.01981e-06	up	2.53917	2.53917	1.34436
iCOS-iCOSL Signaling in T Helper Cells	0.553	0.0333	NaN	GAB1	GRB2 associated binding protein 1	Cytoplasm	kinase	0.000120758	1.28231e-05	down	2.38756	-2.38756	-1.25554
iCOS-iCOSL Signaling in T Helper Cells	0.553	0.0333	NaN	NFKBIE	NFKB inhibitor epsilon	Nucleus	transcription regulator	7.29755e-05	3.81911e-06	up	2.23963	2.23963	1.16326
iCOS-iCOSL Signaling in T Helper Cells	0.553	0.0333	NaN	FGFR2	fibroblast growth factor receptor 2	Plasma Membrane	kinase	0.000292993	7.4204e-05	down	4.45302	-4.45302	-2.15478
phagosome maturation	0.553	0.0333	NaN	NCF2	neutrophil cytosolic factor 2	Cytoplasm	enzyme	0.000241371	4.9582e-05	up	2.83754	2.83754	1.50464
phagosome maturation	0.553	0.0333	NaN	ATP6V0D2	ATPase H+ transporting V0 subunit d2	Cytoplasm	transporter	0.000761211	0.000399292	up	2.12224	2.12224	1.08559
phagosome maturation	0.553	0.0333	NaN	TAP1	transporter 1, ATP-binding cassette, sub-family B (MDR/TAP)	Cytoplasm	transporter	4.66557e-05	7.245e-07	up	2.08292	2.08292	1.05861
phagosome maturation	0.553	0.0333	NaN	SNAP25	synaptosome associated protein 25kDa	Plasma Membrane	transporter	0.000114304	1.12265e-05	down	2.84358	-2.84358	-1.50771
IL-3 Signaling	0.549	0.0361	NaN	GAB1	GRB2 associated binding protein 1	Cytoplasm	kinase	0.000120758	1.28231e-05	down	2.38756	-2.38756	-1.25554
IL-3 Signaling	0.549	0.0361	NaN	FGFR2	fibroblast growth factor receptor 2	Plasma Membrane	kinase	0.000292993	7.4204e-05	down	4.45302	-4.45302	-2.15478
IL-3 Signaling	0.549	0.0361	NaN	STAT1	signal transducer and activator of transcription 1	Nucleus	transcription regulator	0.000127302	1.44319e-05	down	2.48387	-2.48387	-1.31259
Prolactin Signaling	0.549	0.0361	NaN	GAB1	GRB2 associated binding protein 1	Cytoplasm	kinase	0.000120758	1.28231e-05	down	2.38756	-2.38756	-1.25554
Prolactin Signaling	0.549	0.0361	NaN	FGFR2	fibroblast growth factor receptor 2	Plasma Membrane	kinase	0.000292993	7.4204e-05	down	4.45302	-4.45302	-2.15478
Prolactin Signaling	0.549	0.0361	NaN	STAT1	signal transducer and activator of transcription 1	Nucleus	transcription regulator	0.000127302	1.44319e-05	down	2.48387	-2.48387	-1.31259
Telomere Extension by Telomerase	0.542	0.0667	NaN	TERF1	telomeric repeat binding factor 1	Nucleus	other	8.51936e-05	5.98124e-06	down	2.0612	-2.0612	-1.04349
NAD biosynthesis II (from tryptophan)	0.542	0.0667	NaN	KMO	kynurenine 3-monooxygenase (kynurenine 3-hydroxylase)	Cytoplasm	enzyme	0.000132	1.54366e-05	down	2.75964	-2.75964	-1.46448
Natural Killer Cell Signaling	0.538	0.0328	NaN	GAB1	GRB2 associated binding protein 1	Cytoplasm	kinase	0.000120758	1.28231e-05	down	2.38756	-2.38756	-1.25554
Natural Killer Cell Signaling	0.538	0.0328	NaN	VAV3	vav guanine nucleotide exchange factor 3	Extracellular Space	cytokine	9.63321e-05	7.8327e-06	down	8.02289	-8.02289	-3.00412
Natural Killer Cell Signaling	0.538	0.0328	NaN	FGFR2	fibroblast growth factor receptor 2	Plasma Membrane	kinase	0.000292993	7.4204e-05	down	4.45302	-4.45302	-2.15478
Natural Killer Cell Signaling	0.538	0.0328	NaN	KLRC1	killer cell lectin like receptor C1	Plasma Membrane	transmembrane receptor	6.68109e-05	2.69456e-06	up	3.83336	3.83336	1.93861
Role of NANOG in Mammalian Embryonic Stem Cell Pluripotency	0.538	0.0328	NaN	FZD8	frizzled class receptor 8	Plasma Membrane	G-protein coupled receptor	0.000607384	0.000270472	up	2.43015	2.43015	1.28104
Role of NANOG in Mammalian Embryonic Stem Cell Pluripotency	0.538	0.0328	NaN	GAB1	GRB2 associated binding protein 1	Cytoplasm	kinase	0.000120758	1.28231e-05	down	2.38756	-2.38756	-1.25554
Role of NANOG in Mammalian Embryonic Stem Cell Pluripotency	0.538	0.0328	NaN	FGFR2	fibroblast growth factor receptor 2	Plasma Membrane	kinase	0.000292993	7.4204e-05	down	4.45302	-4.45302	-2.15478
Role of NANOG in Mammalian Embryonic Stem Cell Pluripotency	0.538	0.0328	NaN	WNT5A	Wnt family member 5A	Extracellular Space	cytokine	9.09658e-05	6.84293e-06	up	3.07702	3.07702	1.62154
Graft-versus-Host Disease Signaling	0.537	0.0417	NaN	IL6	interleukin 6	Extracellular Space	cytokine	3.65159e-05	2.68298e-07	up	2.78882	2.78882	1.47965
Graft-versus-Host Disease Signaling	0.537	0.0417	NaN	TNF	tumor necrosis factor	Extracellular Space	cytokine	0.000291147	7.31026e-05	up	2.74571	2.74571	1.45718
Cell Cycle: G2/M DNA Damage Checkpoint Regulation	0.525	0.0408	NaN	CDKN1A	cyclin-dependent kinase inhibitor 1A	Nucleus	kinase	0.000177018	2.76906e-05	up	2.34183	2.34183	1.22764
Cell Cycle: G2/M DNA Damage Checkpoint Regulation	0.525	0.0408	NaN	HIPK2	homeodomain interacting protein kinase 2	Nucleus	kinase	4.76218e-05	8.20133e-07	down	3.90758	-3.90758	-1.96627
Thrombin Signaling	0.522	0.0296	-1.342	PLCB4	phospholipase C beta 4	Cytoplasm	enzyme	0.000577089	0.000248086	down	2.07794	-2.07794	-1.05515
Thrombin Signaling	0.522	0.0296	-1.342	GAB1	GRB2 associated binding protein 1	Cytoplasm	kinase	0.000120758	1.28231e-05	down	2.38756	-2.38756	-1.25554
Thrombin Signaling	0.522	0.0296	-1.342	RHOB	ras homolog family member B	Cytoplasm	enzyme	6.81397e-05	2.79312e-06	down	3.93244	-3.93244	-1.97543
Thrombin Signaling	0.522	0.0296	-1.342	FGFR2	fibroblast growth factor receptor 2	Plasma Membrane	kinase	0.000292993	7.4204e-05	down	4.45302	-4.45302	-2.15478
Thrombin Signaling	0.522	0.0296	-1.342	ADCY7	adenylate cyclase 7	Plasma Membrane	enzyme	0.000171656	2.62247e-05	down	2.13945	-2.13945	-1.09724
Thrombin Signaling	0.522	0.0296	-1.342	GNG12	G protein subunit gamma 12	Plasma Membrane	enzyme	0.000320542	8.8399e-05	down	3.05299	-3.05299	-1.61022
LPS-stimulated MAPK Signaling	0.522	0.0349	NaN	GAB1	GRB2 associated binding protein 1	Cytoplasm	kinase	0.000120758	1.28231e-05	down	2.38756	-2.38756	-1.25554
LPS-stimulated MAPK Signaling	0.522	0.0349	NaN	NFKBIE	NFKB inhibitor epsilon	Nucleus	transcription regulator	7.29755e-05	3.81911e-06	up	2.23963	2.23963	1.16326
LPS-stimulated MAPK Signaling	0.522	0.0349	NaN	FGFR2	fibroblast growth factor receptor 2	Plasma Membrane	kinase	0.000292993	7.4204e-05	down	4.45302	-4.45302	-2.15478
Methylglyoxal Degradation III	0.518	0.0625	NaN	AKR1B10	aldo-keto reductase family 1, member B10 (aldose reductase)	Cytoplasm	enzyme	0.000245566	5.14517e-05	down	2.36178	-2.36178	-1.23988
α-Adrenergic Signaling	0.513	0.0345	NaN	PRKAR2B	protein kinase cAMP-dependent type II regulatory subunit beta	Cytoplasm	kinase	0.000487765	0.000185126	down	3.53523	-3.53523	-1.8218
α-Adrenergic Signaling	0.513	0.0345	NaN	ADCY7	adenylate cyclase 7	Plasma Membrane	enzyme	0.000171656	2.62247e-05	down	2.13945	-2.13945	-1.09724
α-Adrenergic Signaling	0.513	0.0345	NaN	GNG12	G protein subunit gamma 12	Plasma Membrane	enzyme	0.000320542	8.8399e-05	down	3.05299	-3.05299	-1.61022
Assembly of RNA Polymerase II Complex	0.513	0.04	NaN	TAF13	TATA-box binding protein associated factor 13	Nucleus	transcription regulator	0.00113922	0.000750164	up	2.87707	2.87707	1.5246
Assembly of RNA Polymerase II Complex	0.513	0.04	NaN	TAF9B	TATA-box binding protein associated factor 9b	Nucleus	transcription regulator	6.88576e-05	2.9817e-06	down	2.4706	-2.4706	-1.30486
FXR/RXR Activation	0.509	0.0317	NaN	C3	complement component 3	Extracellular Space	peptidase	0.000166276	2.38974e-05	up	3.15758	3.15758	1.65882
FXR/RXR Activation	0.509	0.0317	NaN	SAA1	serum amyloid A1	Extracellular Space	transporter	7.47863e-05	4.10752e-06	up	2.96712	2.96712	1.56907
FXR/RXR Activation	0.509	0.0317	NaN	SAA2	serum amyloid A2	Extracellular Space	other	0.000270696	6.3702e-05	up	2.83328	2.83328	1.50248
FXR/RXR Activation	0.509	0.0317	NaN	TNF	tumor necrosis factor	Extracellular Space	cytokine	0.000291147	7.31026e-05	up	2.74571	2.74571	1.45718
Neuregulin Signaling	0.504	0.0341	NaN	ITGA2	integrin subunit alpha 2	Plasma Membrane	transmembrane receptor	0.000106124	9.61516e-06	up	4.46447	4.46447	2.15849
Neuregulin Signaling	0.504	0.0341	NaN	HBEGF	heparin binding EGF like growth factor	Extracellular Space	growth factor	0.000324605	9.06211e-05	up	2.92802	2.92802	1.54993
Neuregulin Signaling	0.504	0.0341	NaN	AREG	amphiregulin	Extracellular Space	growth factor	0.00030687	8.06945e-05	up	2.63063	2.63063	1.39541
Signaling by Rho Family GTPases	0.503	0.0283	-0.816	GAB1	GRB2 associated binding protein 1	Cytoplasm	kinase	0.000120758	1.28231e-05	down	2.38756	-2.38756	-1.25554
Signaling by Rho Family GTPases	0.503	0.0283	-0.816	RHOB	ras homolog family member B	Cytoplasm	enzyme	6.81397e-05	2.79312e-06	down	3.93244	-3.93244	-1.97543
Signaling by Rho Family GTPases	0.503	0.0283	-0.816	NCF2	neutrophil cytosolic factor 2	Cytoplasm	enzyme	0.000241371	4.9582e-05	up	2.83754	2.83754	1.50464
Signaling by Rho Family GTPases	0.503	0.0283	-0.816	ITGA2	integrin subunit alpha 2	Plasma Membrane	transmembrane receptor	0.000106124	9.61516e-06	up	4.46447	4.46447	2.15849
Signaling by Rho Family GTPases	0.503	0.0283	-0.816	CDH6	cadherin 6	Plasma Membrane	other	5.28114e-05	1.29647e-06	down	2.96946	-2.96946	-1.5702
Signaling by Rho Family GTPases	0.503	0.0283	-0.816	FGFR2	fibroblast growth factor receptor 2	Plasma Membrane	kinase	0.000292993	7.4204e-05	down	4.45302	-4.45302	-2.15478
Signaling by Rho Family GTPases	0.503	0.0283	-0.816	GNG12	G protein subunit gamma 12	Plasma Membrane	enzyme	0.000320542	8.8399e-05	down	3.05299	-3.05299	-1.61022
Tight Junction Signaling	0.499	0.0299	NaN	PRKAR2B	protein kinase cAMP-dependent type II regulatory subunit beta	Cytoplasm	kinase	0.000487765	0.000185126	down	3.53523	-3.53523	-1.8218
Tight Junction Signaling	0.499	0.0299	NaN	CNKSR3	CNKSR family member 3	Plasma Membrane	kinase	0.000104812	9.19111e-06	down	2.05759	-2.05759	-1.04095
Tight Junction Signaling	0.499	0.0299	NaN	PPP2R1B	protein phosphatase 2 regulatory subunit A, beta	Plasma Membrane	phosphatase	0.00054298	0.000223565	down	3.20601	-3.20601	-1.68078
Tight Junction Signaling	0.499	0.0299	NaN	SNAP25	synaptosome associated protein 25kDa	Plasma Membrane	transporter	0.000114304	1.12265e-05	down	2.84358	-2.84358	-1.50771
Tight Junction Signaling	0.499	0.0299	NaN	TNF	tumor necrosis factor	Extracellular Space	cytokine	0.000291147	7.31026e-05	up	2.74571	2.74571	1.45718
CD27 Signaling in Lymphocytes	0.49	0.0385	NaN	NFKBIE	NFKB inhibitor epsilon	Nucleus	transcription regulator	7.29755e-05	3.81911e-06	up	2.23963	2.23963	1.16326
CD27 Signaling in Lymphocytes	0.49	0.0385	NaN	MAP3K1	mitogen-activated protein kinase kinase kinase 1	Cytoplasm	kinase	0.000104164	9.08987e-06	down	2.99182	-2.99182	-1.58102
CD28 Signaling in T Helper Cells	0.488	0.031	NaN	GAB1	GRB2 associated binding protein 1	Cytoplasm	kinase	0.000120758	1.28231e-05	down	2.38756	-2.38756	-1.25554
CD28 Signaling in T Helper Cells	0.488	0.031	NaN	NFKBIE	NFKB inhibitor epsilon	Nucleus	transcription regulator	7.29755e-05	3.81911e-06	up	2.23963	2.23963	1.16326
CD28 Signaling in T Helper Cells	0.488	0.031	NaN	MAP3K1	mitogen-activated protein kinase kinase kinase 1	Cytoplasm	kinase	0.000104164	9.08987e-06	down	2.99182	-2.99182	-1.58102
CD28 Signaling in T Helper Cells	0.488	0.031	NaN	FGFR2	fibroblast growth factor receptor 2	Plasma Membrane	kinase	0.000292993	7.4204e-05	down	4.45302	-4.45302	-2.15478
Wnt/β-catenin Signaling	0.487	0.0296	1	FZD8	frizzled class receptor 8	Plasma Membrane	G-protein coupled receptor	0.000607384	0.000270472	up	2.43015	2.43015	1.28104
Wnt/β-catenin Signaling	0.487	0.0296	1	SFRP4	secreted frizzled related protein 4	Plasma Membrane	transmembrane receptor	0.00117179	0.000782337	down	2.0725	-2.0725	-1.05137
Wnt/β-catenin Signaling	0.487	0.0296	1	MMP7	matrix metallopeptidase 7	Extracellular Space	peptidase	0.000324617	9.07357e-05	down	4.18581	-4.18581	-2.06551
Wnt/β-catenin Signaling	0.487	0.0296	1	PPP2R1B	protein phosphatase 2 regulatory subunit A, beta	Plasma Membrane	phosphatase	0.00054298	0.000223565	down	3.20601	-3.20601	-1.68078
Wnt/β-catenin Signaling	0.487	0.0296	1	WNT5A	Wnt family member 5A	Extracellular Space	cytokine	9.09658e-05	6.84293e-06	up	3.07702	3.07702	1.62154
14-3-3-mediated Signaling	0.481	0.0308	NaN	PLCB4	phospholipase C beta 4	Cytoplasm	enzyme	0.000577089	0.000248086	down	2.07794	-2.07794	-1.05515
14-3-3-mediated Signaling	0.481	0.0308	NaN	GAB1	GRB2 associated binding protein 1	Cytoplasm	kinase	0.000120758	1.28231e-05	down	2.38756	-2.38756	-1.25554
14-3-3-mediated Signaling	0.481	0.0308	NaN	FGFR2	fibroblast growth factor receptor 2	Plasma Membrane	kinase	0.000292993	7.4204e-05	down	4.45302	-4.45302	-2.15478
14-3-3-mediated Signaling	0.481	0.0308	NaN	TNF	tumor necrosis factor	Extracellular Space	cytokine	0.000291147	7.31026e-05	up	2.74571	2.74571	1.45718
Cellular Effects of Sildenafil (Viagra)	0.481	0.0308	NaN	PLCB4	phospholipase C beta 4	Cytoplasm	enzyme	0.000577089	0.000248086	down	2.07794	-2.07794	-1.05515
Cellular Effects of Sildenafil (Viagra)	0.481	0.0308	NaN	PRKAR2B	protein kinase cAMP-dependent type II regulatory subunit beta	Cytoplasm	kinase	0.000487765	0.000185126	down	3.53523	-3.53523	-1.8218
Cellular Effects of Sildenafil (Viagra)	0.481	0.0308	NaN	ADCY7	adenylate cyclase 7	Plasma Membrane	enzyme	0.000171656	2.62247e-05	down	2.13945	-2.13945	-1.09724
Cellular Effects of Sildenafil (Viagra)	0.481	0.0308	NaN	GUCY1B3	guanylate cyclase 1, soluble, beta 3	Cytoplasm	enzyme	0.000294466	7.54152e-05	down	2.03253	-2.03253	-1.02328
Acute Myeloid Leukemia Signaling	0.48	0.033	NaN	KITLG	KIT ligand	Extracellular Space	growth factor	3.70634e-05	2.92673e-07	down	2.80656	-2.80656	-1.4888
Acute Myeloid Leukemia Signaling	0.48	0.033	NaN	GAB1	GRB2 associated binding protein 1	Cytoplasm	kinase	0.000120758	1.28231e-05	down	2.38756	-2.38756	-1.25554
Acute Myeloid Leukemia Signaling	0.48	0.033	NaN	FGFR2	fibroblast growth factor receptor 2	Plasma Membrane	kinase	0.000292993	7.4204e-05	down	4.45302	-4.45302	-2.15478
FcγRIIB Signaling in B Lymphocytes	0.479	0.0377	NaN	GAB1	GRB2 associated binding protein 1	Cytoplasm	kinase	0.000120758	1.28231e-05	down	2.38756	-2.38756	-1.25554
FcγRIIB Signaling in B Lymphocytes	0.479	0.0377	NaN	FGFR2	fibroblast growth factor receptor 2	Plasma Membrane	kinase	0.000292993	7.4204e-05	down	4.45302	-4.45302	-2.15478
Phototransduction Pathway	0.479	0.0377	NaN	PRKAR2B	protein kinase cAMP-dependent type II regulatory subunit beta	Cytoplasm	kinase	0.000487765	0.000185126	down	3.53523	-3.53523	-1.8218
Phototransduction Pathway	0.479	0.0377	NaN	GUCY1B3	guanylate cyclase 1, soluble, beta 3	Cytoplasm	enzyme	0.000294466	7.54152e-05	down	2.03253	-2.03253	-1.02328
D-myo-inositol (1,4,5)-trisphosphate Degradation	0.476	0.0556	NaN	IMPA2	inositol monophosphatase 2	Cytoplasm	phosphatase	0.000179469	2.84106e-05	down	3.52874	-3.52874	-1.81915
Mitochondrial Dysfunction	0.476	0.0292	NaN	PRDX3	peroxiredoxin 3	Cytoplasm	enzyme	3.70634e-05	2.96236e-07	down	2.10772	-2.10772	-1.07569
Mitochondrial Dysfunction	0.476	0.0292	NaN	UCP2	uncoupling protein 2	Cytoplasm	transporter	0.000212663	3.87543e-05	down	2.04574	-2.04574	-1.03262
Mitochondrial Dysfunction	0.476	0.0292	NaN	SOD2	superoxide dismutase 2, mitochondrial	Cytoplasm	enzyme	5.71384e-05	1.58904e-06	up	2.2088	2.2088	1.14326
Mitochondrial Dysfunction	0.476	0.0292	NaN	GPD2	glycerol-3-phosphate dehydrogenase 2	Cytoplasm	enzyme	5.90349e-05	1.79976e-06	down	2.02677	-2.02677	-1.01918
Mitochondrial Dysfunction	0.476	0.0292	NaN	XDH	xanthine dehydrogenase	Cytoplasm	enzyme	0.000240351	4.90388e-05	up	2.04405	2.04405	1.03143
p70S6K Signaling	0.475	0.0305	-1	PLCB4	phospholipase C beta 4	Cytoplasm	enzyme	0.000577089	0.000248086	down	2.07794	-2.07794	-1.05515
p70S6K Signaling	0.475	0.0305	-1	GAB1	GRB2 associated binding protein 1	Cytoplasm	kinase	0.000120758	1.28231e-05	down	2.38756	-2.38756	-1.25554
p70S6K Signaling	0.475	0.0305	-1	FGFR2	fibroblast growth factor receptor 2	Plasma Membrane	kinase	0.000292993	7.4204e-05	down	4.45302	-4.45302	-2.15478
p70S6K Signaling	0.475	0.0305	-1	PPP2R1B	protein phosphatase 2 regulatory subunit A, beta	Plasma Membrane	phosphatase	0.00054298	0.000223565	down	3.20601	-3.20601	-1.68078
RhoGDI Signaling	0.464	0.0289	1	RHOB	ras homolog family member B	Cytoplasm	enzyme	6.81397e-05	2.79312e-06	down	3.93244	-3.93244	-1.97543
RhoGDI Signaling	0.464	0.0289	1	ITGA2	integrin subunit alpha 2	Plasma Membrane	transmembrane receptor	0.000106124	9.61516e-06	up	4.46447	4.46447	2.15849
RhoGDI Signaling	0.464	0.0289	1	CDH6	cadherin 6	Plasma Membrane	other	5.28114e-05	1.29647e-06	down	2.96946	-2.96946	-1.5702
RhoGDI Signaling	0.464	0.0289	1	GNG12	G protein subunit gamma 12	Plasma Membrane	enzyme	0.000320542	8.8399e-05	down	3.05299	-3.05299	-1.61022
RhoGDI Signaling	0.464	0.0289	1	ARHGDIB	Rho GDP dissociation inhibitor beta	Cytoplasm	enzyme	6.05334e-05	1.96135e-06	up	3.30009	3.30009	1.7225
Fcγ Receptor-mediated Phagocytosis in Macrophages and Monocytes	0.464	0.0323	NaN	HMOX1	heme oxygenase 1	Cytoplasm	enzyme	3.07978e-05	1.0198e-07	up	7.17615	7.17615	2.84321
Fcγ Receptor-mediated Phagocytosis in Macrophages and Monocytes	0.464	0.0323	NaN	VAV3	vav guanine nucleotide exchange factor 3	Extracellular Space	cytokine	9.63321e-05	7.8327e-06	down	8.02289	-8.02289	-3.00412
Fcγ Receptor-mediated Phagocytosis in Macrophages and Monocytes	0.464	0.0323	NaN	CSF2	colony stimulating factor 2	Extracellular Space	cytokine	0.000181511	2.91396e-05	up	3.2134	3.2134	1.6841
Salvage Pathways of Pyrimidine Ribonucleotides	0.464	0.0323	NaN	PRKAA1	protein kinase AMP-activated catalytic subunit alpha 1	Cytoplasm	kinase	0.00048552	0.000183941	down	2.44451	-2.44451	-1.28954
Salvage Pathways of Pyrimidine Ribonucleotides	0.464	0.0323	NaN	AK4	adenylate kinase 4	Cytoplasm	kinase	0.000354553	0.000104528	down	2.32812	-2.32812	-1.21917
Salvage Pathways of Pyrimidine Ribonucleotides	0.464	0.0323	NaN	CDA	cytidine deaminase	Nucleus	enzyme	0.000722094	0.000367313	up	2.01104	2.01104	1.00794
PPAR Signaling	0.464	0.0323	NaN	NFKBIE	NFKB inhibitor epsilon	Nucleus	transcription regulator	7.29755e-05	3.81911e-06	up	2.23963	2.23963	1.16326
PPAR Signaling	0.464	0.0323	NaN	TNF	tumor necrosis factor	Extracellular Space	cytokine	0.000291147	7.31026e-05	up	2.74571	2.74571	1.45718
PPAR Signaling	0.464	0.0323	NaN	MAP4K4	mitogen-activated protein kinase kinase kinase kinase 4	Cytoplasm	kinase	0.000136555	1.64327e-05	up	2.15776	2.15776	1.10954
Role of CHK Proteins in Cell Cycle Checkpoint Control	0.458	0.0364	NaN	CDKN1A	cyclin-dependent kinase inhibitor 1A	Nucleus	kinase	0.000177018	2.76906e-05	up	2.34183	2.34183	1.22764
Role of CHK Proteins in Cell Cycle Checkpoint Control	0.458	0.0364	NaN	PPP2R1B	protein phosphatase 2 regulatory subunit A, beta	Plasma Membrane	phosphatase	0.00054298	0.000223565	down	3.20601	-3.20601	-1.68078
GADD45 Signaling	0.458	0.0526	NaN	CDKN1A	cyclin-dependent kinase inhibitor 1A	Nucleus	kinase	0.000177018	2.76906e-05	up	2.34183	2.34183	1.22764
Histamine Degradation	0.458	0.0526	NaN	ALDH1A1	aldehyde dehydrogenase 1 family member A1	Cytoplasm	enzyme	4.38315e-05	5.73166e-07	down	3.45275	-3.45275	-1.78775
Cardiac β-adrenergic Signaling	0.449	0.0296	NaN	PRKAR2B	protein kinase cAMP-dependent type II regulatory subunit beta	Cytoplasm	kinase	0.000487765	0.000185126	down	3.53523	-3.53523	-1.8218
Cardiac β-adrenergic Signaling	0.449	0.0296	NaN	PPP2R1B	protein phosphatase 2 regulatory subunit A, beta	Plasma Membrane	phosphatase	0.00054298	0.000223565	down	3.20601	-3.20601	-1.68078
Cardiac β-adrenergic Signaling	0.449	0.0296	NaN	ADCY7	adenylate cyclase 7	Plasma Membrane	enzyme	0.000171656	2.62247e-05	down	2.13945	-2.13945	-1.09724
Cardiac β-adrenergic Signaling	0.449	0.0296	NaN	GNG12	G protein subunit gamma 12	Plasma Membrane	enzyme	0.000320542	8.8399e-05	down	3.05299	-3.05299	-1.61022
Actin Nucleation by ARP-WASP Complex	0.448	0.0357	NaN	RHOB	ras homolog family member B	Cytoplasm	enzyme	6.81397e-05	2.79312e-06	down	3.93244	-3.93244	-1.97543
Actin Nucleation by ARP-WASP Complex	0.448	0.0357	NaN	ITGA2	integrin subunit alpha 2	Plasma Membrane	transmembrane receptor	0.000106124	9.61516e-06	up	4.46447	4.46447	2.15849
Calcium Signaling	0.437	0.0281	NaN	RCAN1	regulator of calcineurin 1	Nucleus	transcription regulator	7.03519e-05	3.19708e-06	up	2.17179	2.17179	1.11888
Calcium Signaling	0.437	0.0281	NaN	PRKAR2B	protein kinase cAMP-dependent type II regulatory subunit beta	Cytoplasm	kinase	0.000487765	0.000185126	down	3.53523	-3.53523	-1.8218
Calcium Signaling	0.437	0.0281	NaN	MEF2D	myocyte enhancer factor 2D	Nucleus	transcription regulator	0.000102885	8.85955e-06	up	2.07063	2.07063	1.05007
Calcium Signaling	0.437	0.0281	NaN	MCU	mitochondrial calcium uniporter	Cytoplasm	ion channel	6.08588e-05	2.15417e-06	down	2.31706	-2.31706	-1.2123
Calcium Signaling	0.437	0.0281	NaN	RAP1A	RAP1A, member of RAS oncogene family	Cytoplasm	enzyme	5.67199e-05	1.48871e-06	up	2.16819	2.16819	1.11649
Oxidative Ethanol Degradation III	0.423	0.0476	NaN	ALDH1A1	aldehyde dehydrogenase 1 family member A1	Cytoplasm	enzyme	4.38315e-05	5.73166e-07	down	3.45275	-3.45275	-1.78775
Systemic Lupus Erythematosus Signaling	0.412	0.0267	NaN	CD40	CD40 molecule	Plasma Membrane	transmembrane receptor	9.69248e-05	8.01981e-06	up	2.53917	2.53917	1.34436
Systemic Lupus Erythematosus Signaling	0.412	0.0267	NaN	GAB1	GRB2 associated binding protein 1	Cytoplasm	kinase	0.000120758	1.28231e-05	down	2.38756	-2.38756	-1.25554
Systemic Lupus Erythematosus Signaling	0.412	0.0267	NaN	FGFR2	fibroblast growth factor receptor 2	Plasma Membrane	kinase	0.000292993	7.4204e-05	down	4.45302	-4.45302	-2.15478
Systemic Lupus Erythematosus Signaling	0.412	0.0267	NaN	IL6	interleukin 6	Extracellular Space	cytokine	3.65159e-05	2.68298e-07	up	2.78882	2.78882	1.47965
Systemic Lupus Erythematosus Signaling	0.412	0.0267	NaN	LSM5	LSM5 homolog, U6 small nuclear RNA and mRNA degradation associated	Cytoplasm	other	4.38315e-05	5.51746e-07	down	2.88024	-2.88024	-1.52619
Systemic Lupus Erythematosus Signaling	0.412	0.0267	NaN	TNF	tumor necrosis factor	Extracellular Space	cytokine	0.000291147	7.31026e-05	up	2.74571	2.74571	1.45718
Dermatan Sulfate Biosynthesis	0.411	0.0333	NaN	CHST1	carbohydrate sulfotransferase 1	Cytoplasm	enzyme	0.00110681	0.000717112	up	3.40019	3.40019	1.76562
Dermatan Sulfate Biosynthesis	0.411	0.0333	NaN	CSGALNACT2	chondroitin sulfate N-acetylgalactosaminyltransferase 2	Cytoplasm	enzyme	0.000966498	0.000581025	up	2.06044	2.06044	1.04295
Fatty Acid α-oxidation	0.407	0.0455	NaN	ALDH1A1	aldehyde dehydrogenase 1 family member A1	Cytoplasm	enzyme	4.38315e-05	5.73166e-07	down	3.45275	-3.45275	-1.78775
VEGF Signaling	0.393	0.0291	NaN	GAB1	GRB2 associated binding protein 1	Cytoplasm	kinase	0.000120758	1.28231e-05	down	2.38756	-2.38756	-1.25554
VEGF Signaling	0.393	0.0291	NaN	VEGFC	vascular endothelial growth factor C	Extracellular Space	growth factor	4.25833e-05	4.70028e-07	up	2.6596	2.6596	1.41121
VEGF Signaling	0.393	0.0291	NaN	FGFR2	fibroblast growth factor receptor 2	Plasma Membrane	kinase	0.000292993	7.4204e-05	down	4.45302	-4.45302	-2.15478
TCA Cycle II (Eukaryotic)	0.393	0.0435	NaN	SUCLA2	succinate-CoA ligase ADP-forming beta subunit	Cytoplasm	enzyme	0.00010603	9.53441e-06	down	3.90407	-3.90407	-1.96498
Chronic Myeloid Leukemia Signaling	0.387	0.0288	NaN	GAB1	GRB2 associated binding protein 1	Cytoplasm	kinase	0.000120758	1.28231e-05	down	2.38756	-2.38756	-1.25554
Chronic Myeloid Leukemia Signaling	0.387	0.0288	NaN	CDKN1A	cyclin-dependent kinase inhibitor 1A	Nucleus	kinase	0.000177018	2.76906e-05	up	2.34183	2.34183	1.22764
Chronic Myeloid Leukemia Signaling	0.387	0.0288	NaN	FGFR2	fibroblast growth factor receptor 2	Plasma Membrane	kinase	0.000292993	7.4204e-05	down	4.45302	-4.45302	-2.15478
Synaptic Long Term Depression	0.386	0.0274	0	PLA2G4A	phospholipase A2 group IVA	Cytoplasm	enzyme	0.000319621	8.78429e-05	up	2.0774	2.0774	1.05478
Synaptic Long Term Depression	0.386	0.0274	0	PLCB4	phospholipase C beta 4	Cytoplasm	enzyme	0.000577089	0.000248086	down	2.07794	-2.07794	-1.05515
Synaptic Long Term Depression	0.386	0.0274	0	PPP2R1B	protein phosphatase 2 regulatory subunit A, beta	Plasma Membrane	phosphatase	0.00054298	0.000223565	down	3.20601	-3.20601	-1.68078
Synaptic Long Term Depression	0.386	0.0274	0	GUCY1B3	guanylate cyclase 1, soluble, beta 3	Cytoplasm	enzyme	0.000294466	7.54152e-05	down	2.03253	-2.03253	-1.02328
PCP pathway	0.385	0.0317	NaN	FZD8	frizzled class receptor 8	Plasma Membrane	G-protein coupled receptor	0.000607384	0.000270472	up	2.43015	2.43015	1.28104
PCP pathway	0.385	0.0317	NaN	WNT5A	Wnt family member 5A	Extracellular Space	cytokine	9.09658e-05	6.84293e-06	up	3.07702	3.07702	1.62154
IL-22 Signaling	0.379	0.0417	NaN	STAT1	signal transducer and activator of transcription 1	Nucleus	transcription regulator	0.000127302	1.44319e-05	down	2.48387	-2.48387	-1.31259
Role of JAK1, JAK2 and TYK2 in Interferon Signaling	0.379	0.0417	NaN	STAT1	signal transducer and activator of transcription 1	Nucleus	transcription regulator	0.000127302	1.44319e-05	down	2.48387	-2.48387	-1.31259
Estrogen-mediated S-phase Entry	0.379	0.0417	NaN	CDKN1A	cyclin-dependent kinase inhibitor 1A	Nucleus	kinase	0.000177018	2.76906e-05	up	2.34183	2.34183	1.22764
Endometrial Cancer Signaling	0.377	0.0312	NaN	GAB1	GRB2 associated binding protein 1	Cytoplasm	kinase	0.000120758	1.28231e-05	down	2.38756	-2.38756	-1.25554
Endometrial Cancer Signaling	0.377	0.0312	NaN	FGFR2	fibroblast growth factor receptor 2	Plasma Membrane	kinase	0.000292993	7.4204e-05	down	4.45302	-4.45302	-2.15478
IL-2 Signaling	0.377	0.0312	NaN	GAB1	GRB2 associated binding protein 1	Cytoplasm	kinase	0.000120758	1.28231e-05	down	2.38756	-2.38756	-1.25554
IL-2 Signaling	0.377	0.0312	NaN	FGFR2	fibroblast growth factor receptor 2	Plasma Membrane	kinase	0.000292993	7.4204e-05	down	4.45302	-4.45302	-2.15478
Hypoxia Signaling in the Cardiovascular System	0.369	0.0308	NaN	UBE2N	ubiquitin conjugating enzyme E2 N	Cytoplasm	enzyme	0.000101046	8.66474e-06	down	2.23654	-2.23654	-1.16127
Hypoxia Signaling in the Cardiovascular System	0.369	0.0308	NaN	NFKBIE	NFKB inhibitor epsilon	Nucleus	transcription regulator	7.29755e-05	3.81911e-06	up	2.23963	2.23963	1.16326
Superpathway of D-myo-inositol (1,4,5)-trisphosphate Metabolism	0.365	0.04	NaN	IMPA2	inositol monophosphatase 2	Cytoplasm	phosphatase	0.000179469	2.84106e-05	down	3.52874	-3.52874	-1.81915
Gluconeogenesis I	0.365	0.04	NaN	ME1	malic enzyme 1	Cytoplasm	enzyme	8.46898e-05	5.81387e-06	down	2.50435	-2.50435	-1.32443
Ethanol Degradation IV	0.365	0.04	NaN	ALDH1A1	aldehyde dehydrogenase 1 family member A1	Cytoplasm	enzyme	4.38315e-05	5.73166e-07	down	3.45275	-3.45275	-1.78775
Mitotic Roles of Polo-Like Kinase	0.362	0.0303	NaN	PLK2	polo like kinase 2	Nucleus	kinase	0.00010572	9.37622e-06	down	2.12728	-2.12728	-1.08901
Mitotic Roles of Polo-Like Kinase	0.362	0.0303	NaN	PPP2R1B	protein phosphatase 2 regulatory subunit A, beta	Plasma Membrane	phosphatase	0.00054298	0.000223565	down	3.20601	-3.20601	-1.68078
GABA Receptor Signaling	0.354	0.0299	NaN	GPHN	gephyrin	Plasma Membrane	enzyme	0.000595076	0.000261477	down	2.00646	-2.00646	-1.00465
GABA Receptor Signaling	0.354	0.0299	NaN	ADCY7	adenylate cyclase 7	Plasma Membrane	enzyme	0.000171656	2.62247e-05	down	2.13945	-2.13945	-1.09724
NAD Salvage Pathway II	0.353	0.0385	NaN	NT5E	5'-nucleotidase ecto	Plasma Membrane	phosphatase	8.09449e-05	5.25908e-06	up	3.37637	3.37637	1.75547
Type I Diabetes Mellitus Signaling	0.351	0.0273	NaN	NFKBIE	NFKB inhibitor epsilon	Nucleus	transcription regulator	7.29755e-05	3.81911e-06	up	2.23963	2.23963	1.16326
Type I Diabetes Mellitus Signaling	0.351	0.0273	NaN	STAT1	signal transducer and activator of transcription 1	Nucleus	transcription regulator	0.000127302	1.44319e-05	down	2.48387	-2.48387	-1.31259
Type I Diabetes Mellitus Signaling	0.351	0.0273	NaN	TNF	tumor necrosis factor	Extracellular Space	cytokine	0.000291147	7.31026e-05	up	2.74571	2.74571	1.45718
Glioma Signaling	0.351	0.0273	NaN	GAB1	GRB2 associated binding protein 1	Cytoplasm	kinase	0.000120758	1.28231e-05	down	2.38756	-2.38756	-1.25554
Glioma Signaling	0.351	0.0273	NaN	CDKN1A	cyclin-dependent kinase inhibitor 1A	Nucleus	kinase	0.000177018	2.76906e-05	up	2.34183	2.34183	1.22764
Glioma Signaling	0.351	0.0273	NaN	FGFR2	fibroblast growth factor receptor 2	Plasma Membrane	kinase	0.000292993	7.4204e-05	down	4.45302	-4.45302	-2.15478
D-myo-inositol (1,4,5)-Trisphosphate Biosynthesis	0.341	0.037	NaN	PLCB4	phospholipase C beta 4	Cytoplasm	enzyme	0.000577089	0.000248086	down	2.07794	-2.07794	-1.05515
CCR5 Signaling in Macrophages	0.34	0.029	NaN	CCL5	C-C motif chemokine ligand 5	Extracellular Space	cytokine	0.000244253	5.08419e-05	up	3.69923	3.69923	1.88723
CCR5 Signaling in Macrophages	0.34	0.029	NaN	GNG12	G protein subunit gamma 12	Plasma Membrane	enzyme	0.000320542	8.8399e-05	down	3.05299	-3.05299	-1.61022
ErbB2-ErbB3 Signaling	0.34	0.029	NaN	GAB1	GRB2 associated binding protein 1	Cytoplasm	kinase	0.000120758	1.28231e-05	down	2.38756	-2.38756	-1.25554
ErbB2-ErbB3 Signaling	0.34	0.029	NaN	FGFR2	fibroblast growth factor receptor 2	Plasma Membrane	kinase	0.000292993	7.4204e-05	down	4.45302	-4.45302	-2.15478
Myc Mediated Apoptosis Signaling	0.333	0.0286	NaN	GAB1	GRB2 associated binding protein 1	Cytoplasm	kinase	0.000120758	1.28231e-05	down	2.38756	-2.38756	-1.25554
Myc Mediated Apoptosis Signaling	0.333	0.0286	NaN	FGFR2	fibroblast growth factor receptor 2	Plasma Membrane	kinase	0.000292993	7.4204e-05	down	4.45302	-4.45302	-2.15478
Melatonin Signaling	0.326	0.0282	NaN	PLCB4	phospholipase C beta 4	Cytoplasm	enzyme	0.000577089	0.000248086	down	2.07794	-2.07794	-1.05515
Melatonin Signaling	0.326	0.0282	NaN	PRKAR2B	protein kinase cAMP-dependent type II regulatory subunit beta	Cytoplasm	kinase	0.000487765	0.000185126	down	3.53523	-3.53523	-1.8218
ErbB4 Signaling	0.319	0.0278	NaN	GAB1	GRB2 associated binding protein 1	Cytoplasm	kinase	0.000120758	1.28231e-05	down	2.38756	-2.38756	-1.25554
ErbB4 Signaling	0.319	0.0278	NaN	FGFR2	fibroblast growth factor receptor 2	Plasma Membrane	kinase	0.000292993	7.4204e-05	down	4.45302	-4.45302	-2.15478
Intrinsic Prothrombin Activation Pathway	0.318	0.0345	NaN	THBD	thrombomodulin	Plasma Membrane	transmembrane receptor	8.17504e-05	5.46994e-06	up	3.21574	3.21574	1.68515
Glutathione-mediated Detoxification	0.318	0.0345	NaN	GSTA4	glutathione S-transferase alpha 4	Cytoplasm	enzyme	0.000411532	0.000137256	down	2.86343	-2.86343	-1.51774
STAT3 Pathway	0.313	0.0274	NaN	CDKN1A	cyclin-dependent kinase inhibitor 1A	Nucleus	kinase	0.000177018	2.76906e-05	up	2.34183	2.34183	1.22764
STAT3 Pathway	0.313	0.0274	NaN	FGFR2	fibroblast growth factor receptor 2	Plasma Membrane	kinase	0.000292993	7.4204e-05	down	4.45302	-4.45302	-2.15478
Serotonin Degradation	0.306	0.027	NaN	ALDH1A1	aldehyde dehydrogenase 1 family member A1	Cytoplasm	enzyme	4.38315e-05	5.73166e-07	down	3.45275	-3.45275	-1.78775
Serotonin Degradation	0.306	0.027	NaN	IL4I1	interleukin 4 induced 1	Cytoplasm	enzyme	6.88576e-05	2.98039e-06	up	3.48522	3.48522	1.80125
Synaptic Long Term Potentiation	0.298	0.025	NaN	PLCB4	phospholipase C beta 4	Cytoplasm	enzyme	0.000577089	0.000248086	down	2.07794	-2.07794	-1.05515
Synaptic Long Term Potentiation	0.298	0.025	NaN	PRKAR2B	protein kinase cAMP-dependent type II regulatory subunit beta	Cytoplasm	kinase	0.000487765	0.000185126	down	3.53523	-3.53523	-1.8218
Synaptic Long Term Potentiation	0.298	0.025	NaN	RAP1A	RAP1A, member of RAS oncogene family	Cytoplasm	enzyme	5.67199e-05	1.48871e-06	up	2.16819	2.16819	1.11649
Protein Ubiquitination Pathway	0.297	0.0235	NaN	USP36	ubiquitin specific peptidase 36	Nucleus	peptidase	7.12791e-05	3.39386e-06	up	2.06863	2.06863	1.04868
Protein Ubiquitination Pathway	0.297	0.0235	NaN	UBE2N	ubiquitin conjugating enzyme E2 N	Cytoplasm	enzyme	0.000101046	8.66474e-06	down	2.23654	-2.23654	-1.16127
Protein Ubiquitination Pathway	0.297	0.0235	NaN	HSPA9	heat shock protein family A (Hsp70) member 9	Cytoplasm	other	5.12481e-05	1.15744e-06	down	2.64295	-2.64295	-1.40215
Protein Ubiquitination Pathway	0.297	0.0235	NaN	DNAJB6	DnaJ heat shock protein family (Hsp40) member B6	Nucleus	transcription regulator	4.56082e-05	6.29335e-07	up	2.6549	2.6549	1.40866
Protein Ubiquitination Pathway	0.297	0.0235	NaN	DNAJB9	DnaJ heat shock protein family (Hsp40) member B9	Nucleus	other	0.000310326	8.254e-05	up	2.37686	2.37686	1.24906
Protein Ubiquitination Pathway	0.297	0.0235	NaN	TAP1	transporter 1, ATP-binding cassette, sub-family B (MDR/TAP)	Cytoplasm	transporter	4.66557e-05	7.245e-07	up	2.08292	2.08292	1.05861
Role of Wnt/GSK-3β Signaling in the Pathogenesis of Influenza	0.294	0.0263	NaN	FZD8	frizzled class receptor 8	Plasma Membrane	G-protein coupled receptor	0.000607384	0.000270472	up	2.43015	2.43015	1.28104
Role of Wnt/GSK-3β Signaling in the Pathogenesis of Influenza	0.294	0.0263	NaN	WNT5A	Wnt family member 5A	Extracellular Space	cytokine	9.09658e-05	6.84293e-06	up	3.07702	3.07702	1.62154
Gustation Pathway	0.289	0.0246	NaN	P2RY2	purinergic receptor P2Y2	Plasma Membrane	G-protein coupled receptor	0.000285062	7.05316e-05	up	2.09703	2.09703	1.06835
Gustation Pathway	0.289	0.0246	NaN	PRKAR2B	protein kinase cAMP-dependent type II regulatory subunit beta	Cytoplasm	kinase	0.000487765	0.000185126	down	3.53523	-3.53523	-1.8218
Gustation Pathway	0.289	0.0246	NaN	ADCY7	adenylate cyclase 7	Plasma Membrane	enzyme	0.000171656	2.62247e-05	down	2.13945	-2.13945	-1.09724
Fatty Acid β-oxidation I	0.289	0.0312	NaN	HSD17B4	hydroxysteroid (17-beta) dehydrogenase 4	Cytoplasm	enzyme	3.99514e-05	3.42128e-07	down	2.01416	-2.01416	-1.01018
Non-Small Cell Lung Cancer Signaling	0.288	0.026	NaN	GAB1	GRB2 associated binding protein 1	Cytoplasm	kinase	0.000120758	1.28231e-05	down	2.38756	-2.38756	-1.25554
Non-Small Cell Lung Cancer Signaling	0.288	0.026	NaN	FGFR2	fibroblast growth factor receptor 2	Plasma Membrane	kinase	0.000292993	7.4204e-05	down	4.45302	-4.45302	-2.15478
Role of BRCA1 in DNA Damage Response	0.282	0.0256	NaN	CDKN1A	cyclin-dependent kinase inhibitor 1A	Nucleus	kinase	0.000177018	2.76906e-05	up	2.34183	2.34183	1.22764
Role of BRCA1 in DNA Damage Response	0.282	0.0256	NaN	STAT1	signal transducer and activator of transcription 1	Nucleus	transcription regulator	0.000127302	1.44319e-05	down	2.48387	-2.48387	-1.31259
Cyclins and Cell Cycle Regulation	0.282	0.0256	NaN	CDKN1A	cyclin-dependent kinase inhibitor 1A	Nucleus	kinase	0.000177018	2.76906e-05	up	2.34183	2.34183	1.22764
Cyclins and Cell Cycle Regulation	0.282	0.0256	NaN	PPP2R1B	protein phosphatase 2 regulatory subunit A, beta	Plasma Membrane	phosphatase	0.00054298	0.000223565	down	3.20601	-3.20601	-1.68078
Circadian Rhythm Signaling	0.28	0.0303	NaN	PER3	period circadian clock 3	Nucleus	other	4.21674e-05	4.22784e-07	down	2.73607	-2.73607	-1.45211
B Cell Development	0.28	0.0303	NaN	CD40	CD40 molecule	Plasma Membrane	transmembrane receptor	9.69248e-05	8.01981e-06	up	2.53917	2.53917	1.34436
Role of JAK2 in Hormone-like Cytokine Signaling	0.271	0.0294	NaN	STAT1	signal transducer and activator of transcription 1	Nucleus	transcription regulator	0.000127302	1.44319e-05	down	2.48387	-2.48387	-1.31259
Cell Cycle Regulation by BTG Family Proteins	0.263	0.0286	NaN	PPP2R1B	protein phosphatase 2 regulatory subunit A, beta	Plasma Membrane	phosphatase	0.00054298	0.000223565	down	3.20601	-3.20601	-1.68078
Estrogen Receptor Signaling	0.262	0.0234	NaN	PHB2	prohibitin 2	Cytoplasm	transcription regulator	8.50289e-05	5.93702e-06	down	2.19986	-2.19986	-1.13741
Estrogen Receptor Signaling	0.262	0.0234	NaN	TAF13	TATA-box binding protein associated factor 13	Nucleus	transcription regulator	0.00113922	0.000750164	up	2.87707	2.87707	1.5246
Estrogen Receptor Signaling	0.262	0.0234	NaN	TAF9B	TATA-box binding protein associated factor 9b	Nucleus	transcription regulator	6.88576e-05	2.9817e-06	down	2.4706	-2.4706	-1.30486
autophagy	0.255	0.0278	NaN	WIPI1	WD repeat domain, phosphoinositide interacting 1	Cytoplasm	other	6.05334e-05	2.08826e-06	up	2.46982	2.46982	1.30441
Allograft Rejection Signaling	0.25	0.0238	NaN	CD40	CD40 molecule	Plasma Membrane	transmembrane receptor	9.69248e-05	8.01981e-06	up	2.53917	2.53917	1.34436
Allograft Rejection Signaling	0.25	0.0238	NaN	TNF	tumor necrosis factor	Extracellular Space	cytokine	0.000291147	7.31026e-05	up	2.74571	2.74571	1.45718
Ethanol Degradation II	0.247	0.027	NaN	ALDH1A1	aldehyde dehydrogenase 1 family member A1	Cytoplasm	enzyme	4.38315e-05	5.73166e-07	down	3.45275	-3.45275	-1.78775
Antigen Presentation Pathway	0.247	0.027	NaN	TAP1	transporter 1, ATP-binding cassette, sub-family B (MDR/TAP)	Cytoplasm	transporter	4.66557e-05	7.245e-07	up	2.08292	2.08292	1.05861
HIPPO signaling	0.24	0.0233	NaN	FAT4	FAT atypical cadherin 4	Cytoplasm	other	0.000140996	1.76768e-05	down	2.05447	-2.05447	-1.03877
HIPPO signaling	0.24	0.0233	NaN	PPP2R1B	protein phosphatase 2 regulatory subunit A, beta	Plasma Membrane	phosphatase	0.00054298	0.000223565	down	3.20601	-3.20601	-1.68078
IL-4 Signaling	0.236	0.023	NaN	GAB1	GRB2 associated binding protein 1	Cytoplasm	kinase	0.000120758	1.28231e-05	down	2.38756	-2.38756	-1.25554
IL-4 Signaling	0.236	0.023	NaN	FGFR2	fibroblast growth factor receptor 2	Plasma Membrane	kinase	0.000292993	7.4204e-05	down	4.45302	-4.45302	-2.15478
TGF-β Signaling	0.236	0.023	NaN	VDR	vitamin D (1,25- dihydroxyvitamin D3) receptor	Nucleus	transcription regulator	0.000664155	0.000317745	up	3.17167	3.17167	1.66524
TGF-β Signaling	0.236	0.023	NaN	INHBA	inhibin beta A	Extracellular Space	growth factor	6.18657e-05	2.29577e-06	up	3.71771	3.71771	1.89441
Estrogen Biosynthesis	0.232	0.0256	NaN	HSD17B4	hydroxysteroid (17-beta) dehydrogenase 4	Cytoplasm	enzyme	3.99514e-05	3.42128e-07	down	2.01416	-2.01416	-1.01018
Thyroid Cancer Signaling	0.226	0.025	NaN	CXCL1	C-X-C motif chemokine ligand 1	Extracellular Space	cytokine	7.2018e-05	3.46222e-06	up	2.66667	2.66667	1.41504
Triacylglycerol Degradation	0.201	0.0227	NaN	ABHD2	abhydrolase domain containing 2	Other	enzyme	4.9534e-05	1.01467e-06	down	2.64079	-2.64079	-1.40097
