# Supplementary material for: SKA1 promotes tumor metastasis via SAFB-mediated transcription repression of DUSP6 in clear cell renal cell carcinoma
Source: Aging (Albany NY). 2022 Dec 2;14(23):9679–98. doi: 10.18632/aging.204418 (PMC9792197; doi:10.18632/aging.204418)
Supplement: Supplementary Table 3C [file aging-14-204418-s006.xlsx]

## Sheet: Diseases_And_Functions
Supplementary Table 3C. Ranking of disease and functions according to score of individual molecular network.
Categories	Diseases or Functions Annotation	p-Value	Predicted Activation State	Activation z-score	Molecules	# Molecules	Counts of AntibodyList
Cardiovascular System Development and Function	development of vasculature	7.59e-25	Increased	2.67	ACKR3,ADORA2B,AIMP1,ANTXR2,ARHGAP22,ARID3B,ARID4A,BMPER,C3,CAV2,CCL2,CCL5,CD40,CDKN1A,COL13A1,CSF2,CTSS,CXCL1,CXCL2,CXCL5,CXCL8,CYLD,ECE1,EGLN3,EGR1,ELK3,EPHB1,ETS1,F3,FGF1,FGF5,FGFR2,FZD8,GAB1,GEM,GJB2,GPR180,HAS2,HBEGF,HIPK2,HMOX1,HOXA13,ICAM1,ID1,IGFBP3,IL6,INHBA,ISM1,ITGA2,KITLG,MIR17HG,MMP1,MMP14,MMP7,MMP9,NRP2,PAPPA,PCSK5,PDZK1,PLA2G4A,PLAT,PLAU,PLAUR,PPIA,PRKAA1,PROCR,PTGER2,PTGIS,PTGS1,PT…	101	25
Cardiovascular System Development and Function, Organismal Development	angiogenesis	1.53e-24	Increased	2.67	ADORA2B,AIMP1,ARHGAP22,BMPER,C3,CAV2,CCL2,CCL5,CD40,CDKN1A,COL13A1,CSF2,CTSS,CXCL1,CXCL2,CXCL5,CXCL8,CYLD,ECE1,EGLN3,EGR1,ELK3,EPHB1,ETS1,F3,FGF1,FGF5,FGFR2,FZD8,GAB1,GEM,HAS2,HBEGF,HIPK2,HMOX1,HOXA13,ICAM1,ID1,IGFBP3,IL6,INHBA,ISM1,ITGA2,KITLG,MIR17HG,MMP1,MMP14,MMP7,MMP9,NRP2,PAPPA,PCSK5,PDZK1,PLA2G4A,PLAT,PLAU,PLAUR,PPIA,PRKAA1,PROCR,PTGER2,PTGIS,PTGS1,PTX3,RAP1A,RASA3,RCAN1,RGS4,RHOB,ROBO4,RP…	93	25
Cellular Movement	migration of cells	1.52e-23	Increased	2.992	ABHD2,ACKR3,ADORA2B,AIMP1,ALOX5AP,AREG,ARHGDIB,ARRDC3,ATP8A1,C3,CCL2,CCL20,CCL5,CCRL2,CD40,CD82,CDKN1A,CHST1,CLEC4E,COL17A1,CSF2,CTSS,CXCL1,CXCL11,CXCL2,CXCL3,CXCL5,CXCL8,CYLD,DDX58,DNAJB6,DOCK4,DUSP6,EGLN3,EGR1,ELK3,ENAH,EPHB1,ETS1,ETV5,F3,FGF1,FGF5,FGFR2,GAB1,GAL3ST1,GDF15,GJB2,GNG12,GUCY1B3,HAS2,HAVCR1,HBEGF,HMGA2,HMOX1,ICAM1,ID1,IGFBP3,IL6,ILF3,INHBA,ITGA2,ITGB6,KITLG,KLF4,LAMB3,LAMC2,LCP1,LI…	143	30
Cellular Movement	cell movement	4.88e-22	Increased	2.454	ABHD2,ACKR3,ADORA2B,AIMP1,ALOX5AP,AREG,ARHGAP22,ARHGDIB,ARRDC3,ARTN,ATP8A1,C3,CCL2,CCL20,CCL5,CCRL2,CD40,CD82,CDKN1A,CHST1,CLEC4E,COL17A1,CSF2,CTSS,CXCL1,CXCL11,CXCL2,CXCL3,CXCL5,CXCL8,CYLD,DDX58,DNAJB6,DOCK4,DUSP6,EGLN3,EGR1,ELF3,ELK3,ENAH,EPHB1,ETS1,ETV5,F3,FGF1,FGF5,FGFR2,GAB1,GAL3ST1,GDF15,GJB2,GNG12,GUCY1B3,HAS2,HAVCR1,HBEGF,HIPK2,HMGA2,HMOX1,ICAM1,ID1,IGFBP3,IL6,ILF3,INHBA,ITGA2,ITGB6,KITLG…	150	30
Cellular Movement	cell movement of tumor cell lines	8.75e-22	Increased	2.4	ACKR3,AREG,ARHGDIB,ARRDC3,C3,CCL2,CCL20,CCL5,CD40,CD82,CDKN1A,CSF2,CXCL11,CXCL2,CXCL3,CXCL5,CXCL8,DDX58,DNAJB6,DOCK4,EGLN3,EGR1,ENAH,EPHB1,ETS1,ETV5,F3,FGF1,FGF5,FGFR2,GAB1,GDF15,HAS2,HBEGF,HIPK2,HMGA2,HMOX1,ID1,IGFBP3,IL6,ILF3,ITGA2,ITGB6,KITLG,KLF4,LAMB3,LAMC2,LCP1,LRIG1,MAP3K1,MAP4K4,MMP1,MMP14,MMP7,MMP9,MYO10,NREP,NRP2,P2RY2,PHB2,PHLDA1,PLAT,PLAU,PLAUR,PODXL,PPIA,PPIF,RAB11FIP1,RAP1A,RGS3,RHO…	86	23
Cardiovascular System Development and Function, Organismal Development	vasculogenesis	5.3e-21	Increased	2.458	AIMP1,ARHGAP22,BMPER,C3,CAV2,CCL2,CD40,CDKN1A,COL13A1,CSF2,CXCL1,CXCL2,CXCL8,CYLD,ECE1,EGLN3,EGR1,ETS1,F3,FGF1,FGF5,FGFR2,GAB1,GEM,HAS2,HBEGF,HIPK2,HMOX1,HOXA13,ICAM1,ID1,IGFBP3,IL6,INHBA,ITGA2,KITLG,MIR17HG,MMP1,MMP14,MMP7,MMP9,NRP2,PAPPA,PCSK5,PDZK1,PLA2G4A,PLAT,PLAU,PLAUR,PPIA,PRKAA1,PROCR,PTGER2,PTX3,RAP1A,RASA3,RCAN1,RGS4,RHOB,ROBO4,S1PR1,SAA1,SEMA3A,SEMA3C,SEMA6A,SERPIND1,SPRY2,STAT1,STC1,T…	77	24
Cellular Movement	migration of tumor cell lines	1.14e-20	Increased	2.565	ACKR3,AREG,ARHGDIB,ARRDC3,CCL2,CCL20,CCL5,CD40,CD82,CDKN1A,CSF2,CXCL11,CXCL2,CXCL5,CXCL8,DDX58,DNAJB6,EGLN3,EGR1,ENAH,EPHB1,ETS1,ETV5,F3,FGF1,FGF5,FGFR2,GAB1,GDF15,HAS2,HBEGF,HMGA2,HMOX1,ID1,IGFBP3,IL6,ILF3,ITGA2,ITGB6,KITLG,KLF4,LAMB3,LAMC2,MAP3K1,MAP4K4,MMP1,MMP14,MMP7,MMP9,MYO10,NREP,NRP2,P2RY2,PHB2,PHLDA1,PLAT,PLAU,PLAUR,PODXL,PPIF,RAP1A,RGS3,RHOB,RPS6KA5,SEMA3A,SFRP4,SOD2,SPRY2,STAT1,THRB,TL…	76	23
Cellular Function and Maintenance	function of antigen presenting cells	2.36e-20		1.195	ADORA2B,CCL2,CCL5,CD40,CLEC4E,CSF2,CTSS,CYLD,DDX58,EGR1,F3,GDF15,GPR68,ICAM1,IFIH1,IL6,IRAK2,LCP1,LTB,LY96,MAVS,MMP14,MMP7,MMP9,NLRP3,PDCD1LG2,PLA2G4A,PLAT,PLAU,PLAUR,PPIA,PTGER2,RAP1A,SEMA3A,SLAMF8,STAT1,TLR2,TNF,TPCN1,UCP2	40	12
Cellular Movement, Immune Cell Trafficking	leukocyte migration	3.51e-20	Increased	2.931	ACKR3,ADORA2B,AIMP1,ALOX5AP,C3,CCL2,CCL20,CCL5,CCRL2,CD40,CDKN1A,CHST1,CLEC4E,CSF2,CTSS,CXCL1,CXCL11,CXCL2,CXCL3,CXCL5,CXCL8,DDX58,EGLN3,EGR1,ETS1,F3,FGF1,GAL3ST1,GDF15,GJB2,HAVCR1,HMOX1,ICAM1,IGFBP3,IL6,INHBA,ITGA2,KITLG,LCP1,LITAF,LTB,LY96,MAVS,MIR17HG,MMP1,MMP14,MMP7,MMP9,NLRP3,NRP2,NT5E,P2RY2,PDCD1LG2,PELI1,PLA2G4A,PLAT,PLAU,PLAUR,PPIA,PROCR,PTX3,RAP1A,RCAN1,RGS3,RHOB,S1PR1,SAA1,SEMA3A,SERP1,…	83	22
Cellular Movement	invasion of cells	2.61e-19	Increased	2.62	ACKR3,ANXA8/ANXA8L1,AREG,ARRDC3,ARTN,CCL2,CD82,CDKN1A,COPB2,CSF2,CTSS,CXCL1,CXCL5,CXCL8,DDX58,DNAJB6,DNMBP,DOCK4,DUSP6,EGR1,ELF3,ENAH,ETS1,ETV5,F3,FAM43A,FGFR2,GAB1,GDF15,GEM,HAS2,HBEGF,HIPK2,HMGA2,HMOX1,ID1,IL6,ILF3,INHBA,ITGA2,ITGB6,KITLG,KLF4,LAMB3,LCP1,LRIG1,MAP4K4,MIR17HG,MMP1,MMP14,MMP9,NRP2,PAPPA,PLAT,PLAU,PLAUR,PODXL,PPIF,PRKAA1,PTGER2,RAB11FIP1,RAP1A,RGS4,RHOB,RPSA,SAA1,SERP1,SOD2,SP100,…	82	24
Cell Death and Survival	cell death	2.65e-19		1.225	ACKR3,ADD3,ADORA2B,AIMP1,ALDH1A1,AMACR,ANTXR2,AREG,ARG2,ARHGDIB,ARID3B,ARTN,ATP6V0D2,BCL2A1,BRINP1,C3,CCL2,CCL5,CCNG1,CD40,CD82,CDA,CDH6,CDKN1A,CDKN1C,CERS6,CFI,COPB2,CSF2,CTSS,CXCL1,CXCL11,CXCL2,CXCL3,CXCL8,CYB5R4,CYLD,DAP,DDX58,DNAJB6,DUSP6,DUT,ECE1,EGLN3,EGR1,EMP1,ETS1,ETV5,F3,FAT4,FBXO32,FGF1,FGF5,FGFR2,G0S2,GAB1,GALNT3,GDF15,GEM,GJB2,GPHN,HAS2,HBEGF,HERPUD1,HIPK2,HMGA2,HMOX1,HOXA13,HSD17B4,H…	196	34
Cell Death and Survival	necrosis	4.1e-19		0.438	ACKR3,ADORA2B,AIMP1,ALDH1A1,AMACR,ANTXR2,AREG,ARG2,ARID3B,ARTN,BCL2A1,BRINP1,C3,CCL2,CCL5,CCNG1,CD40,CD82,CDA,CDH6,CDKN1A,CDKN1C,CERS6,COPB2,CSF2,CTSS,CXCL1,CXCL11,CXCL2,CXCL3,CXCL8,CYB5R4,CYLD,DDX58,DUSP6,DUT,EGLN3,EGR1,EMP1,ETS1,F3,FBXO32,FGF1,FGF5,FGFR2,G0S2,GAB1,GALNT3,GDF15,GEM,GJB2,HAS2,HBEGF,HERPUD1,HIPK2,HMGA2,HMOX1,HSPA9,ICAM1,ID1,IFIH1,IGFBP3,IL6,INHBA,IRAK2,IRF9,ISM1,ITGA2,KCNK3,KITLG,…	165	32
Tissue Development	development of epithelial tissue	4.34e-19	Increased	2.814	AIMP1,ANTXR2,ARHGAP22,BMPER,C3,CA2,CAV2,CCL2,CD40,CDKN1A,CSF2,CXCL1,CXCL2,CXCL8,ECE1,EGR1,F3,FGF1,FGF5,FGFR2,GAB1,GJB2,HBEGF,HIPK2,HMOX1,HOXA13,HSD17B4,ID1,IL6,INHBA,ITGA2,KITLG,KLF4,MAP3K1,MIR17HG,MMP1,MMP14,MMP9,NRP2,PLA2G4A,PLAT,PLAUR,PPIA,PROCR,RASA3,RCAN1,RHOB,SAA1,SEMA3A,SEMA6A,SERPIND1,SPRY2,STAT1,STC1,TNF,VEGFC,VEZF1,WNT5A,XDH	59	18
Inflammatory Response	inflammatory response	5.18e-19	Increased	3.213	ACKR3,ADORA2B,AIMP1,ALOX5AP,APOL3,BCL2A1,C3,CCL2,CCL20,CCL5,CCRL2,CD40,CDKN1A,CERS6,CLEC4E,CSF2,CTSS,CXCL1,CXCL11,CXCL2,CXCL3,CXCL5,CXCL8,CYLD,EGR1,ETS1,FGF1,GPR68,HAVCR1,HMOX1,ICAM1,IL6,INHBA,IRAK2,ITGA2,ITGB6,KITLG,KLF4,LCP1,LITAF,LY96,MAVS,MMP1,MMP14,MMP7,MMP9,NDFIP1,NLRP3,NT5E,PELI1,PLA2G4A,PLAT,PLAU,PLAUR,PPIA,PROCR,PTGER2,PTGIS,PTGS1,PTX3,RHOB,S1PR1,SAA1,SEMA7A,STAT1,SWAP70,THBD,TLR2,TNF,TN…	75	21
Cardiovascular System Development and Function, Tissue Development	development of endothelial tissue	6.57e-19	Increased	2.654	AIMP1,ARHGAP22,BMPER,C3,CAV2,CCL2,CDKN1A,CSF2,CXCL1,CXCL2,CXCL8,EGR1,F3,FGF1,FGF5,FGFR2,HBEGF,HIPK2,HMOX1,HOXA13,ID1,IL6,INHBA,ITGA2,MIR17HG,MMP1,MMP14,MMP9,NRP2,PLA2G4A,PLAT,PLAUR,PPIA,PROCR,RASA3,RCAN1,RHOB,SAA1,SEMA3A,SEMA6A,SERPIND1,STAT1,STC1,TNF,VEGFC,VEZF1,WNT5A,XDH	48	16
Cellular Function and Maintenance	function of phagocytes	1.23e-18		1.463	ADORA2B,BCL2A1,C3,CCL2,CCL5,CD40,CLEC4E,CSF2,CXCL8,CYLD,DDX58,EGR1,F3,GDF15,GPR68,ICAM1,IFIH1,IL6,IRAK2,LCP1,LTB,LY96,MAVS,MMP14,MMP7,MMP9,NLRP3,PDCD1LG2,PLA2G4A,PLAC8,PLAT,PLAU,PLAUR,PPIA,PTGER2,RAP1A,SEMA3A,SLAMF8,STAT1,TLR2,TNF,TPCN1,UCP2	43	13
Cell-To-Cell Signaling and Interaction, Cellular Movement, Hematological System Development and Function, Immune Cell Trafficking	recruitment of leukocytes	4.6e-18	Increased	3.567	ADORA2B,ALOX5AP,C3,CCL2,CCL20,CCL5,CD40,CLEC4E,CSF2,CXCL1,CXCL11,CXCL2,CXCL3,CXCL5,CXCL8,DDX58,EGR1,ETS1,F3,GDF15,HMOX1,ICAM1,IL6,KITLG,LY96,MMP1,MMP9,NLRP3,P2RY2,PELI1,PTX3,RAP1A,RCAN1,RHOB,S1PR1,SEMA3A,SOD2,SWAP70,TLR2,TNF,UCP2,VAV3,VDR,XDH	44	13
Cellular Function and Maintenance	function of blood cells	8.92e-18	Increased	2.174	ADORA2B,ARHGDIB,BCL2A1,C3,CCL2,CCL5,CCRL2,CD40,CDKN1A,CLEC4E,CSF2,CTSS,CXCL8,CYLD,DDX58,EGR1,ETS1,F3,GDF15,GPR68,HAVCR1,ICAM1,ID1,IFIH1,IL6,IRAK2,ITGA2,LCP1,LTB,LY96,MAVS,MMP14,MMP7,MMP9,NLRP3,NT5E,PDCD1LG2,PLA2G4A,PLAC8,PLAT,PLAU,PLAUR,PNP,PPIA,PTGER2,PTGS1,PTPN13,RAP1A,RCAN1,S1PR1,SEMA3A,SLAMF8,STAT1,TAP1,THBD,TLR2,TNF,TNFAIP3,TPCN1,UCP2,VDR	61	18
Cardiovascular System Development and Function, Cellular Development, Cellular Function and Maintenance, Cellular Growth and Proliferation, Organismal Development, Tissue Development	endothelial cell development	9.11e-18	Increased	2.815	AIMP1,ARHGAP22,BMPER,C3,CAV2,CCL2,CDKN1A,CSF2,CXCL1,CXCL2,CXCL8,EGR1,F3,FGF1,FGF5,FGFR2,HBEGF,HIPK2,HMOX1,HOXA13,ID1,IL6,INHBA,ITGA2,MIR17HG,MMP1,MMP14,MMP9,NRP2,PLA2G4A,PLAUR,PPIA,PROCR,RASA3,RCAN1,SAA1,SEMA3A,SEMA6A,SERPIND1,STAT1,STC1,TNF,VEGFC,VEZF1,WNT5A,XDH	46	16
Cell Death and Survival	necrosis of epithelial tissue	5.01e-17		0.093	AIMP1,ALDH1A1,ARG2,BCL2A1,CD40,CDKN1A,CTSS,CXCL3,CXCL8,CYB5R4,CYLD,DUSP6,EGR1,EMP1,F3,FGF1,GDF15,HIPK2,HMOX1,ICAM1,ID1,IGFBP3,IL6,INHBA,ISM1,ITGA2,MAP3K1,MAVS,MLKL,MMP9,NDEL1,NLRP3,PLA2G4A,PLAT,PLAU,PLAUR,PPIA,PRDX3,PRKAA1,PROCR,PTCH1,PTGIS,PTGS1,RGS4,RHOB,S1PR1,SAA1,SEMA3A,SEMA6A,SEMA7A,SOD2,STAT1,THBD,TLR2,TNF,TNFAIP3,TNFRSF19,TRAF1,UCP2,XDH	60	16
Cellular Growth and Proliferation	proliferation of cells	6.19e-17		1.091	ACKR3,ADORA2B,AIMP1,AK4,AKR1B10,ALDH1A1,ALOX5AP,AMACR,AREG,ARHGDIB,ARID3B,ARID4A,ARRDC3,ARTN,BCL2A1,BMPER,BRINP1,C3,CAV2,CCDC85B,CCL2,CCL20,CCL5,CCNG1,CD40,CD82,CD83,CDA,CDKN1A,CDKN1C,CNOT6,COPB2,CSF2,CTDSPL,CTSS,CXCL1,CXCL11,CXCL2,CXCL3,CXCL5,CXCL8,CYLD,DAP,DDX58,DNAJB6,DNER,DOCK4,DPY30,DUSP6,EGLN3,EGR1,ELF3,EMP1,ENAH,EPHB1,ETS1,ETV5,F3,FAT4,FBXO32,FGF1,FGF5,FGFR2,FZD8,G0S2,GAB1,GAL3ST1,GALNT3,G…	202	30
Cancer, Organismal Injury and Abnormalities	growth of tumor	1.16e-16	Increased	2.279	ACKR3,AIMP1,AKR1B10,AREG,ARRDC3,ARTN,CCL2,CCL5,CD40,CD82,CDKN1A,CERS6,CSF2,CTSS,CXCL1,CXCL11,CXCL3,CXCL5,CXCL8,DNAJB6,DOCK4,EGR1,ETS1,F3,FGF1,FGFR2,GALNT3,GDF15,GPR68,HBEGF,HMGA2,HMOX1,ICAM1,ID1,IGFBP3,IL6,ILF3,INHBA,ITGB6,KITLG,LITAF,LRIG1,MIR17HG,MMP1,MMP14,MMP7,MMP9,NLRP3,NT5E,PHLDA1,PLA2G4A,PLAT,PLAU,PLAUR,PROCR,PTCH1,PTGER2,PTPN13,RCAN1,RHOB,SLC7A11,SOD2,SRGN,STAT1,THBD,THRB,TLR2,TNF,TPD52,V…	73	18
Cellular Function and Maintenance	function of leukocytes	1.33e-16		1.985	ADORA2B,ARHGDIB,BCL2A1,C3,CCL2,CCL5,CCRL2,CD40,CLEC4E,CSF2,CTSS,CXCL8,CYLD,DDX58,EGR1,ETS1,F3,GDF15,GPR68,HAVCR1,ICAM1,IFIH1,IL6,IRAK2,LCP1,LTB,LY96,MAVS,MMP14,MMP7,MMP9,NLRP3,PDCD1LG2,PLA2G4A,PLAC8,PLAT,PLAU,PLAUR,PNP,PPIA,PTGER2,PTPN13,RAP1A,RCAN1,S1PR1,SEMA3A,SLAMF8,STAT1,TAP1,THBD,TLR2,TNF,TNFAIP3,TPCN1,UCP2,VDR	56	15
Organismal Survival	morbidity or mortality	1.36e-16		-0.457	ABHD5,ACKR3,ADAMTS9,ADCY7,ADORA2B,ALDH1A1,AMACR,ANTXR2,AREG,ARHGDIB,ARID3B,ARID4A,BCL2A1,BMPER,C3,CCNG1,CD40,CDA,CDKN1A,CLEC4E,COL13A1,CSF2,CXCL11,CXCL2,CXCL3,CXCL5,CXCL8,CYLD,DDX58,DHRS3,DNAJB6,DNAJB9,ECE1,EGLN3,ELK3,ENAH,ETS1,F3,FAT4,FGFR2,GAB1,GDF15,GJB2,GPD2,GPHN,GUCY1B3,HAS2,HAVCR1,HBEGF,HIPK2,HMGA2,HMOX1,HOXA13,HSD17B4,ICAM1,ID1,IFIH1,IGFBP3,IL6,ILF3,INHBA,IRAK2,IRF9,KITLG,KLF4,LAMC2,LCP1,L…	150	23
Cellular Function and Maintenance, Hematological System Development and Function	function of macrophages	2.16e-16			ADORA2B,CCL2,CCL5,CLEC4E,CSF2,EGR1,F3,GDF15,GPR68,ICAM1,IL6,IRAK2,LCP1,LY96,MAVS,MMP7,NLRP3,PLA2G4A,PLAT,PLAU,PLAUR,PPIA,PTGER2,RAP1A,SLAMF8,STAT1,TLR2,TNF,TPCN1,UCP2	30	9
Cellular Function and Maintenance, Hematological System Development and Function	function of myeloid cells	2.45e-16		0	ADORA2B,BCL2A1,CCL2,CCL5,CLEC4E,CSF2,CXCL8,DDX58,EGR1,F3,GDF15,GPR68,ICAM1,IL6,IRAK2,LCP1,LY96,MAVS,MMP7,MMP9,NLRP3,PLA2G4A,PLAC8,PLAT,PLAU,PLAUR,PPIA,PTGER2,RAP1A,SLAMF8,STAT1,TLR2,TNF,TPCN1,UCP2	35	12
Cell Death and Survival	cell survival	2.88e-16	Increased	2.171	ACKR3,ADORA2B,AIMP1,ANLN,ANTXR2,AREG,ARTN,BCL2A1,C3,CA2,CCL2,CCL5,CCNG1,CD40,CD82,CDKN1A,CDKN1C,COL17A1,COPB2,CSF2,CTDSPL,CXCL1,CXCL11,CXCL2,CXCL3,CXCL8,CYLD,DNAJB6,DUSP6,EGLN3,EGR1,ELF3,EMP1,ETV5,FBXO32,FGF1,FGF5,FGFR2,GAB1,GALNT3,GDF15,GPR180,HBEGF,HERPUD1,HIPK2,HMGA2,HMOX1,ICAM1,IFIH1,IGFBP3,IL6,IRF9,KITLG,KLF4,LRIG1,MAP3K1,MIR17HG,MMP1,MMP9,NCF2,NEFL,PHB2,PLA2G4A,PLAC8,PLAT,PLAU,PLAUR,PLK2,PP…	102	24
Organismal Survival	organismal death	5.82e-16		-1.033	ABHD5,ACKR3,ADAMTS9,ADCY7,ADORA2B,ALDH1A1,AMACR,ANTXR2,AREG,ARHGDIB,ARID3B,ARID4A,BCL2A1,BMPER,C3,CCNG1,CD40,CDA,CDKN1A,COL13A1,CSF2,CXCL11,CXCL2,CXCL3,CXCL5,CXCL8,CYLD,DDX58,DHRS3,DNAJB6,DNAJB9,ECE1,EGLN3,ELK3,ENAH,ETS1,F3,FAT4,FGFR2,GAB1,GDF15,GJB2,GPD2,GPHN,GUCY1B3,HAS2,HAVCR1,HBEGF,HIPK2,HMGA2,HMOX1,HOXA13,HSD17B4,ICAM1,ID1,IFIH1,IGFBP3,IL6,ILF3,INHBA,IRF9,KITLG,KLF4,LAMC2,LCP1,LIN7C,LTB,LY96…	147	22
Cellular Movement	invasion of tumor cell lines	9.72e-16	Increased	2.474	ANXA8/ANXA8L1,AREG,ARRDC3,ARTN,CCL2,CD82,CDKN1A,COPB2,CSF2,CTSS,CXCL5,CXCL8,DDX58,DNAJB6,DNMBP,DOCK4,DUSP6,EGR1,ELF3,ENAH,ETS1,ETV5,FAM43A,FGFR2,GDF15,HAS2,HBEGF,HIPK2,HMOX1,ID1,IL6,ILF3,ITGB6,KLF4,LAMB3,LCP1,LRIG1,MAP4K4,MMP1,MMP14,MMP9,NRP2,PAPPA,PLAT,PLAU,PLAUR,PODXL,PPIF,PRKAA1,PTGER2,RAB11FIP1,RAP1A,RPSA,SAA1,SOD2,SP100,SPRY2,STAT1,TNF,VAV3,VEGFC,WNT5A,WSB1,ZAK	64	20
Dermatological Diseases and Conditions	psoriasis	1.34e-15		1.913	ANXA8/ANXA8L1,ARHGDIB,C3,CCL2,CCL20,CDKN1C,COPB2,CSF2,CTSS,CXCL1,CXCL11,CXCL3,CXCL5,CXCL8,DDX58,EGR1,ELL2,EPSTI1,FGFR2,G0S2,GBAS,GJB2,HMOX1,ICAM1,ID1,IFI44,IFI44L,IGFBP3,IL6,ISG20,ITGA2,LRIG1,ME1,MMP1,MMP14,MMP9,NRP2,OAS1,OAS3,PDZK1,PLAT,PLAU,PPIF,PTGS1,SEMA3A,SERPINB2,SERPINB8,SOD2,STAT1,THBD,TLR2,TNF,TNFAIP3,TWF1,UBE2N,VDR,WNT5A	57	16
Cell Death and Survival	cell viability	1.78e-15	Increased	2.082	ACKR3,AIMP1,ANLN,ANTXR2,AREG,ARTN,BCL2A1,C3,CA2,CCL2,CCL5,CCNG1,CD40,CD82,CDKN1A,CDKN1C,COL17A1,COPB2,CSF2,CTDSPL,CXCL1,CXCL11,CXCL2,CXCL3,CXCL8,CYLD,DNAJB6,DUSP6,EGLN3,EGR1,ELF3,FBXO32,FGF1,FGF5,FGFR2,GAB1,GALNT3,GDF15,GPR180,HBEGF,HERPUD1,HIPK2,HMGA2,HMOX1,ICAM1,IFIH1,IGFBP3,IL6,IRF9,KITLG,KLF4,LRIG1,MAP3K1,MIR17HG,MMP1,MMP9,NCF2,NEFL,PHB2,PLA2G4A,PLAC8,PLAT,PLAU,PLAUR,PLK2,PPIA,PPP1R9A,PPP2R1B…	96	23
Hematological System Development and Function, Immune Cell Trafficking, Inflammatory Response, Tissue Development	accumulation of myeloid cells	2.57e-15	Increased	3.206	ACKR3,AIMP1,BCL2A1,C3,CCL2,CCL5,CD40,CSF2,CXCL1,CXCL2,CXCL3,CXCL8,EGR1,F3,FGF1,FGFR2,HMOX1,ITGA2,MMP7,MMP9,NT5E,P2RY2,PLAT,PLAU,PTX3,THBD,TLR2,TNF,VEGFC	29	11
Cellular Movement, Hematological System Development and Function, Immune Cell Trafficking	cell movement of leukocytes	4.33e-15	Increased	2.56	ACKR3,ALOX5AP,C3,CCL2,CCL20,CCL5,CCRL2,CD40,CDKN1A,CHST1,CSF2,CTSS,CXCL1,CXCL11,CXCL2,CXCL3,CXCL5,CXCL8,DDX58,EGLN3,ETS1,F3,GAL3ST1,GDF15,GJB2,HAVCR1,HMOX1,ICAM1,IGFBP3,IL6,INHBA,KITLG,LCP1,LITAF,LTB,MAVS,MMP14,MMP7,MMP9,NLRP3,NRP2,NT5E,PDCD1LG2,PELI1,PLA2G4A,PLAT,PLAU,PLAUR,PPIA,PROCR,PTX3,RAP1A,RHOB,S1PR1,SAA1,SEMA3A,SERP1,STAT1,STC1,SWAP70,THBD,TLR2,TNF,TNFAIP3,UCP2,VAV3,VEGFC,WNT5A	68	19
Hematological System Development and Function, Immune Cell Trafficking, Inflammatory Response, Tissue Development	accumulation of phagocytes	4.62e-15	Increased	2.984	ACKR3,AIMP1,C3,CCL2,CCL5,CD40,CSF2,CXCL1,CXCL2,CXCL3,CXCL8,EGR1,F3,FGF1,FGFR2,HMOX1,ITGA2,MMP7,MMP9,NT5E,PLAT,PLAU,PTX3,STAT1,TNF,VEGFC	26	12
Cell Death and Survival	apoptosis	5.41e-15		0.334	ADORA2B,AIMP1,ALDH1A1,ANTXR2,AREG,ARG2,ARHGDIB,ARID3B,ATP6V0D2,BCL2A1,C3,CCL2,CCL5,CCNG1,CD40,CD82,CDKN1A,CDKN1C,CERS6,CSF2,CTSS,CXCL1,CXCL2,CXCL8,CYLD,DAP,DDX58,DUSP6,DUT,ECE1,EGLN3,EGR1,ETS1,ETV5,F3,FAT4,FBXO32,FGF1,FGF5,FGFR2,G0S2,GAB1,GALNT3,GDF15,GEM,HAS2,HBEGF,HERPUD1,HIPK2,HMGA2,HMOX1,HOXA13,HSPA9,ICAM1,ID1,IFIH1,IGFBP3,IL6,ILF3,INHBA,IRAK2,ISM1,ITGA2,KITLG,KLF4,LIN7C,LRIG1,LTB,MAP3K1,MAP4…	154	34
Cellular Movement, Immune Cell Trafficking	cell movement of lymphatic system cells	5.98e-15	Increased	2.708	ACKR3,C3,CCL2,CCL20,CCL5,CD40,CSF2,CTSS,CXCL1,CXCL11,CXCL3,CXCL8,DDX58,ETS1,FGF1,GJB2,HMOX1,ICAM1,IL6,KITLG,LCP1,LTB,MAVS,MIR17HG,MMP14,MMP9,NLRP3,NT5E,PDCD1LG2,PELI1,PLAU,PPIA,PROCR,RAP1A,S1PR1,SAA1,SEMA3A,SERP1,STAT1,SWAP70,TLR2,TNF,UCP2,VAV3,VEGFC,WNT5A	46	13
Cellular Movement, Hematological System Development and Function, Immune Cell Trafficking	cell movement of myeloid cells	1.15e-14	Increased	2.915	ALOX5AP,C3,CCL2,CCL20,CCL5,CDKN1A,CSF2,CTSS,CXCL1,CXCL11,CXCL2,CXCL3,CXCL5,CXCL8,EGLN3,F3,GAL3ST1,GDF15,GJB2,HAVCR1,HMOX1,ICAM1,IGFBP3,IL6,INHBA,KITLG,LITAF,LTB,MAVS,MMP14,MMP7,MMP9,NLRP3,NT5E,PLA2G4A,PLAT,PLAU,PLAUR,PPIA,PROCR,PTX3,RHOB,S1PR1,SAA1,SEMA3A,STC1,SWAP70,THBD,TLR2,TNF,TNFAIP3,VAV3,VEGFC,WNT5A	54	15
Cell-To-Cell Signaling and Interaction, Cellular Movement, Hematological System Development and Function, Immune Cell Trafficking	recruitment of myeloid cells	2.04e-14	Increased	2.812	ADORA2B,ALOX5AP,C3,CCL2,CCL20,CCL5,CLEC4E,CSF2,CXCL1,CXCL2,CXCL3,CXCL5,CXCL8,F3,GDF15,ICAM1,IL6,KITLG,LY96,MMP1,MMP9,NLRP3,P2RY2,PTX3,RCAN1,S1PR1,SOD2,SWAP70,TLR2,TNF,VAV3,XDH	32	9
Cell-To-Cell Signaling and Interaction, Cellular Movement, Hematological System Development and Function, Immune Cell Trafficking	recruitment of granulocytes	2.17e-14	Increased	2.655	ADORA2B,ALOX5AP,C3,CCL2,CCL20,CCL5,CLEC4E,CSF2,CXCL1,CXCL2,CXCL3,CXCL5,CXCL8,GDF15,ICAM1,IL6,KITLG,LY96,MMP1,MMP9,NLRP3,P2RY2,PTX3,RCAN1,S1PR1,SOD2,SWAP70,TLR2,TNF,VAV3,XDH	31	8
Cellular Movement, Hematological System Development and Function, Immune Cell Trafficking, Inflammatory Response	cell movement of phagocytes	2.38e-14	Increased	2.521	ALOX5AP,C3,CCL2,CCL20,CCL5,CCRL2,CD40,CDKN1A,CSF2,CTSS,CXCL1,CXCL11,CXCL2,CXCL3,CXCL5,CXCL8,EGLN3,GAL3ST1,GJB2,HAVCR1,HMOX1,ICAM1,IL6,INHBA,KITLG,LITAF,LTB,MAVS,MMP14,MMP7,MMP9,NLRP3,NRP2,NT5E,PLA2G4A,PLAT,PLAU,PLAUR,PPIA,PROCR,PTX3,RHOB,S1PR1,SAA1,SEMA3A,STC1,SWAP70,THBD,TLR2,TNF,TNFAIP3,VAV3,VEGFC,WNT5A	54	13
Organismal Injury and Abnormalities	Fibrosis	2.39e-14		1.212	ADORA2B,ARG2,ARID4A,C3,CAV2,CCL2,CD40,CSF2,EGR1,ELF3,ETS1,F3,FGFR2,HAS2,HBEGF,HMGA2,HMOX1,ICAM1,ID1,IL6,INHBA,IRAK2,ITGB6,LIN7C,MEF2D,MMP1,MMP14,MMP7,MMP9,NLRP3,NT5E,PLA2G4A,PLAC8,PLAT,PLAU,PLAUR,PRDX3,PTGIS,PTX3,SEMA7A,SETBP1,SFRP4,SLC7A11,SOAT1,SOD2,STAT1,STC1,TLR2,TNF,TNFAIP3,VAV3,VDR,XDH	53	13
Cellular Movement	cellular infiltration of cells	4.57e-14		1.949	ALOX5AP,C3,CCL2,CCL5,CD40,CSF2,CXCL2,CXCL3,CXCL5,CXCL8,EGLN3,ETS1,F3,GAL3ST1,GJB2,HAVCR1,HMOX1,ICAM1,IGFBP3,IL6,KITLG,LTB,MAVS,MIR17HG,MMP14,MMP9,NLRP3,NT5E,PELI1,PLA2G4A,PLAT,PLAU,PPIA,PROCR,PTX3,SAA1,STAT1,STC1,THBD,TLR2,TNF,TNFAIP3,UCP2,VAV3	44	12
Cell-To-Cell Signaling and Interaction, Cellular Movement, Hematological System Development and Function, Immune Cell Trafficking, Inflammatory Response	recruitment of phagocytes	5.97e-14	Increased	3.984	ALOX5AP,CCL2,CCL20,CCL5,CD40,CLEC4E,CSF2,CXCL1,CXCL2,CXCL3,CXCL5,CXCL8,ETS1,F3,ICAM1,IL6,LY96,MMP1,MMP9,NLRP3,P2RY2,PTX3,RCAN1,RHOB,S1PR1,SEMA3A,SOD2,TLR2,TNF,UCP2,VAV3,VDR,XDH	33	9
Cellular Movement, Immune Cell Trafficking	cell movement of lymphoid cells	7.84e-14	Increased	2.478	ACKR3,C3,CCL2,CCL20,CCL5,CD40,CSF2,CTSS,CXCL1,CXCL11,CXCL3,CXCL8,DDX58,ETS1,GJB2,HMOX1,ICAM1,IL6,LCP1,LTB,MAVS,MIR17HG,MMP14,MMP9,NLRP3,NT5E,PDCD1LG2,PELI1,PLAU,PPIA,PROCR,RAP1A,S1PR1,SAA1,SEMA3A,SERP1,STAT1,SWAP70,TLR2,TNF,UCP2,VAV3,WNT5A	43	11
Cellular Movement, Hematological System Development and Function, Immune Cell Trafficking	cellular infiltration by leukocytes	8.38e-14	Increased	2.048	ALOX5AP,C3,CCL2,CCL5,CD40,CSF2,CXCL2,CXCL3,CXCL5,CXCL8,EGLN3,ETS1,F3,GAL3ST1,GJB2,HAVCR1,HMOX1,ICAM1,IGFBP3,IL6,KITLG,LTB,MAVS,MMP14,MMP9,NLRP3,NT5E,PELI1,PLA2G4A,PLAT,PLAU,PPIA,PROCR,PTX3,SAA1,STAT1,STC1,THBD,TLR2,TNF,TNFAIP3,UCP2,VAV3	43	12
Cellular Movement, Skeletal and Muscular System Development and Function	migration of muscle cells	9.85e-14	Increased	2.33	ALOX5AP,CCL2,CCL5,CSF2,CXCL1,CXCL2,CXCL3,CXCL8,EGR1,F3,GAB1,HAS2,HBEGF,HMOX1,IL6,MMP7,MMP9,PAPPA,PLAT,PLAU,PLAUR,PPIA,RCAN1,S1PR1,TLR2,TNF	26	9
Cellular Development, Cellular Growth and Proliferation, Organ Development, Skeletal and Muscular System Development and Function, Tissue Development	proliferation of smooth muscle cells	1.1e-13	Increased	2.05	ALOX5AP,CCL2,CCL5,CDKN1A,CDKN1C,CXCL8,EGR1,F3,FGFR2,HAS2,HBEGF,HMGA2,HMOX1,IGFBP3,IL6,INHBA,ITGA2,KLF4,MIR17HG,MMP1,MMP14,MMP9,NCF2,PAPPA,PLAT,PLAU,PLAUR,PPIA,S1PR1,STAT1,THBD,TLR2,TNF,TNFAIP3,XDH	35	15
Cellular Movement	transmigration of cells	1.12e-13		1.93	ACKR3,CCL2,CCL5,CD40,CSF2,CTSS,CXCL11,CXCL2,CXCL3,CXCL5,CXCL8,ENAH,F3,GDF15,ICAM1,ID1,IL6,KITLG,MMP14,MMP9,PDCD1LG2,RAP1A,STC1,TNF,VAV3,XDH	26	9
Cardiovascular System Development and Function, Cellular Movement	migration of endothelial cells	1.47e-13	Increased	2.437	ACKR3,AIMP1,CCL2,CCL5,CSF2,CXCL1,CXCL8,CYLD,ETS1,F3,FGF1,FGF5,GAB1,ICAM1,ID1,IGFBP3,MMP14,MMP9,NRP2,PLA2G4A,PLAU,PLAUR,RCAN1,RHOB,S1PR1,SAA1,SEMA3A,SEMA6D,SERPIND1,SFRP4,SP100,STC1,TAB2,THBD,TNF,VAV3,VEGFC,WNT5A	38	12
Cancer, Organismal Injury and Abnormalities	neoplasia of tumor cell lines	1.47e-13		1.919	ADAMTS9,AREG,ARRDC3,ARTN,CCL2,CD82,CDKN1A,CXCL1,CXCL2,CXCL3,CXCL5,CXCL8,EGR1,ETS1,F3,HAS2,HMOX1,IL6,ILF3,INHBA,ITGA2,KLF4,MMP1,MMP9,PLAU,PLAUR,PROCR,SOD2,SPRY2,STAT1,THBD,TLR2,TNF,TPD52,UBE2N,VAV3,VEGFC,WSB1	38	15
Cellular Movement	cell movement of muscle cells	1.59e-13	Increased	2.547	ALOX5AP,CCL2,CCL5,CSF2,CXCL1,CXCL2,CXCL3,CXCL8,EGR1,F3,GAB1,HAS2,HBEGF,HMOX1,IL6,MMP7,MMP9,PAPPA,PLA2G4A,PLAT,PLAU,PLAUR,PPIA,RCAN1,S1PR1,TLR2,TNF	27	9
Infectious Diseases	Bacterial Infections	1.86e-13		-0.24	ADCY7,AIMP1,ALOX5AP,ANTXR2,C3,CCL2,CCRL2,CD40,CD83,COL17A1,CSF2,CXCL5,CXCL8,CYLD,ENTPD7,F3,FGFR2,GDF15,ICAM1,IL6,ILF3,IRAK2,LCP1,LTB,LY96,MMP14,MMP7,MMP9,MXI1,NLRP3,PLAC8,PLAUR,PTGS1,PTPN13,RPS6KA5,SLAMF8,STAT1,TAP1,TLR2,TNF,TNFAIP3,UCP2,VDR	43	12
Hematological System Development and Function, Tissue Morphology	quantity of blood cells	2.28e-13	Increased	3.568	ACKR3,ADD3,ARHGDIB,ARID4A,BCL2A1,C3,CCL2,CCL20,CCL5,CD40,CD83,CDKN1A,CHST1,CLEC4E,CSF2,CTSS,CXCL2,CXCL8,CYLD,DDX58,EGR1,ENTPD7,ETS1,F3,FGFR2,GALNT3,GDF15,GPR68,HAVCR1,HBEGF,HMOX1,HSPA9,ICAM1,ID1,IGFBP3,IL6,INHBA,ITGB6,JARID2,KITLG,KLF4,KLRC1,LITAF,LTB,MAVS,MIR17HG,MMP9,NDFIP1,NFYA,NLRP3,PDCD1LG2,PLAC8,PLAT,PLAU,PNP,PPIA,PTGER2,PTPN13,RCAN1,RCOR1,SAA1,SERPINB2,SERPINB7,SLC19A2,SLC6A6,SOAT1,STARD7,…	78	19
Cellular Movement, Hematological System Development and Function, Immune Cell Trafficking	cell movement of lymphocytes	2.8e-13	Increased	2.614	ACKR3,C3,CCL2,CCL20,CCL5,CD40,CSF2,CTSS,CXCL1,CXCL11,CXCL3,CXCL8,DDX58,ETS1,GJB2,HMOX1,ICAM1,IL6,LCP1,LTB,MAVS,MMP14,MMP9,NLRP3,NT5E,PDCD1LG2,PELI1,PLAU,PPIA,PROCR,RAP1A,S1PR1,SAA1,SEMA3A,SERP1,STAT1,SWAP70,TLR2,TNF,UCP2,VAV3,WNT5A	42	11
Cellular Movement, Hematological System Development and Function, Immune Cell Trafficking	migration of myeloid cells	3.03e-13	Increased	2.703	C3,CCL2,CCL5,CSF2,CXCL1,CXCL11,CXCL2,CXCL3,CXCL5,CXCL8,F3,GDF15,HMOX1,ICAM1,IGFBP3,IL6,MMP14,MMP7,MMP9,NLRP3,PLAU,PLAUR,SAA1,SWAP70,TNF,VAV3	26	9
Tissue Development	growth of epithelial tissue	3.06e-13		1.874	AIMP1,AREG,BCL2A1,BMPER,C3,CAV2,CCL2,CCL5,CDKN1A,CDKN1C,CSF2,CXCL1,CXCL3,CXCL8,EGR1,F3,FGF1,FGF5,FGFR2,GDF15,HAS2,HBEGF,HIPK2,HMOX1,ID1,IL6,INHBA,KITLG,KLF4,LRIG1,LTB,MIR17HG,MMP1,MMP14,MMP7,MMP9,NRP2,PLA2G4A,PLAUR,PPIA,PROCR,PTCH1,PTGER2,RCAN1,RGS4,SAA1,SEMA3A,SEMA6A,SERPIND1,SLC7A11,STAT1,THRB,TLR2,TNF,VAV3,VDR,VEGFC,WNT5A,XDH	59	18
Hematological System Development and Function, Tissue Morphology	quantity of leukocytes	3.14e-13	Increased	2.954	ACKR3,ARHGDIB,ARID4A,BCL2A1,C3,CCL2,CCL20,CCL5,CD40,CD83,CDKN1A,CHST1,CLEC4E,CSF2,CTSS,CXCL2,CXCL8,CYLD,DDX58,EGR1,ENTPD7,ETS1,F3,FGFR2,GALNT3,GDF15,GPR68,HAVCR1,HBEGF,HMOX1,ICAM1,ID1,IGFBP3,IL6,INHBA,ITGB6,JARID2,KITLG,KLF4,KLRC1,LITAF,LTB,MAVS,MIR17HG,MMP9,NDFIP1,NFYA,NLRP3,PDCD1LG2,PLAC8,PLAT,PLAU,PNP,PPIA,PTGER2,PTPN13,SAA1,SERPINB2,SLC6A6,SOAT1,STARD7,STAT1,STK17B,SWAP70,TAP1,THBD,TLR2,TNF,T…	72	19
Cellular Movement, Skeletal and Muscular System Development and Function	migration of smooth muscle cells	3.25e-13	Increased	2.848	ALOX5AP,CCL2,CCL5,CSF2,CXCL1,CXCL2,CXCL3,CXCL8,EGR1,F3,HAS2,HBEGF,HMOX1,IL6,MMP9,PAPPA,PLAT,PLAU,PLAUR,PPIA,RCAN1,S1PR1,TLR2,TNF	24	8
Cellular Movement, Skeletal and Muscular System Development and Function	cell movement of smooth muscle cells	3.45e-13	Increased	3.039	ALOX5AP,CCL2,CCL5,CSF2,CXCL1,CXCL2,CXCL3,CXCL8,EGR1,F3,HAS2,HBEGF,HMOX1,IL6,MMP9,PAPPA,PLA2G4A,PLAT,PLAU,PLAUR,PPIA,RCAN1,S1PR1,TLR2,TNF	25	8
Cellular Movement	chemotaxis	3.77e-13	Increased	2.824	ACKR3,AIMP1,ARTN,C3,CCL2,CCL20,CCL5,CCRL2,CD40,CDKN1A,CSF2,CXCL1,CXCL11,CXCL2,CXCL3,CXCL5,CXCL8,DOCK4,DUSP6,EPHB1,GAB1,HAVCR1,HBEGF,ICAM1,IL6,INHBA,ITGA2,KITLG,LCP1,LITAF,MAP3K1,MMP14,MMP7,MMP9,NRP2,P2RY2,PLAU,PLAUR,PPIA,RGS3,RHOB,S1PR1,SAA1,SEMA3A,SWAP70,THBD,TLR2,TNF,VAV3,VEGFC,WNT5A	51	13
Cardiovascular System Development and Function, Cellular Development, Cellular Function and Maintenance, Cellular Growth and Proliferation, Organismal Development, Tissue Development	proliferation of endothelial cells	4.05e-13	Increased	2.126	AIMP1,BMPER,C3,CAV2,CCL2,CDKN1A,CSF2,CXCL1,CXCL8,EGR1,F3,FGF1,FGF5,FGFR2,HBEGF,HIPK2,HMOX1,ID1,IL6,INHBA,MMP1,NRP2,PLA2G4A,PLAUR,PPIA,PROCR,RCAN1,SAA1,SEMA3A,SEMA6A,SERPIND1,STAT1,TNF,VEGFC,WNT5A,XDH	36	13
Cellular Movement	cellular infiltration	4.08e-13		1.955	ALOX5AP,C3,CCL2,CCL5,CD40,CSF2,CTSS,CXCL2,CXCL3,CXCL5,CXCL8,EGLN3,ETS1,F3,GAL3ST1,GJB2,HAVCR1,HMOX1,ICAM1,IGFBP3,IL6,KITLG,LTB,MAVS,MIR17HG,MMP14,MMP9,NLRP3,NT5E,PELI1,PLA2G4A,PLAT,PLAU,PPIA,PROCR,PTX3,SAA1,STAT1,STC1,THBD,TLR2,TNF,TNFAIP3,UCP2,VAV3	45	12
Cellular Movement, Hematological System Development and Function, Immune Cell Trafficking	migration of granulocytes	4.26e-13	Increased	2.254	C3,CCL2,CCL5,CSF2,CXCL1,CXCL11,CXCL2,CXCL3,CXCL5,CXCL8,F3,GDF15,ICAM1,IGFBP3,IL6,MMP7,MMP9,NLRP3,PLAU,PLAUR,SAA1,SWAP70,TNF,VAV3	24	9
Cellular Movement	chemotaxis of cells	4.31e-13	Increased	2.845	ACKR3,ARTN,C3,CCL2,CCL20,CCL5,CCRL2,CD40,CDKN1A,CSF2,CXCL1,CXCL11,CXCL2,CXCL3,CXCL5,CXCL8,DOCK4,DUSP6,EPHB1,GAB1,HAVCR1,HBEGF,ICAM1,IL6,INHBA,ITGA2,KITLG,LCP1,LITAF,MAP3K1,MMP14,MMP7,MMP9,NRP2,P2RY2,PLAU,PLAUR,PPIA,RGS3,RHOB,S1PR1,SAA1,SEMA3A,SWAP70,THBD,TLR2,TNF,VAV3,VEGFC,WNT5A	50	13
Hematological System Development and Function, Tissue Development	accumulation of blood cells	4.5e-13	Increased	2.92	ACKR3,AIMP1,BCL2A1,C3,CCL2,CCL5,CD40,CSF2,CXCL1,CXCL2,CXCL3,CXCL8,EGR1,F3,FGF1,FGFR2,HMOX1,ICAM1,IL6,ITGA2,MMP7,MMP9,NFYA,NT5E,P2RY2,PLAT,PLAU,PTX3,S1PR1,STAT1,THBD,TLR2,TNF,VEGFC	34	13
Cardiovascular Disease	vascular lesion	5.07e-13		0.726	ALOX5AP,ARG2,CCL2,CD40,CSF2,CTSS,CXCL2,CYLD,EGR1,F3,HAS2,HMOX1,ICAM1,IL6,MMP14,MMP7,MMP9,PAPPA,PCSK5,PLAU,PTGER2,PTGS1,PTX3,RCAN1,SERPIND1,SOAT1,THBD,TLR2,TNFAIP3,VDR	30	9
Cellular Development	differentiation of cells	5.11e-13	Increased	2.576	ABHD5,ADAMTS9,ADORA2B,ANLN,AREG,ARHGAP26,ARID4A,ATP6V0D2,BCL2A1,BMPER,BRINP1,C3,CA2,CCDC85B,CCL2,CCL5,CD40,CD82,CD83,CDKN1A,CLEC4E,COL13A1,CSF2,CTDSPL,CTDSPL2,CXCL1,CXCL5,CXCL8,CYLD,DDX58,DNER,DOCK4,EGLN3,EGR1,EID1,ELF3,EMP1,EPHB1,ETS1,ETV5,FBXO32,FGF1,FGF5,FGFR2,FZD8,GAB1,GDPD5,GEM,GPR68,HAS2,HAVCR1,HBEGF,HIPK2,HMGA2,HMOX1,HSD17B4,HSPA9,ICAM1,ID1,IGFBP3,IL6,INHBA,ITGA2,JARID2,KITLG,KLF4,LAMB3,LC…	133	24
Hematological System Development and Function, Immune Cell Trafficking, Inflammatory Response, Tissue Development	accumulation of leukocytes	6.14e-13	Increased	2.92	ACKR3,AIMP1,BCL2A1,C3,CCL2,CCL5,CD40,CSF2,CXCL1,CXCL2,CXCL3,CXCL8,EGR1,F3,FGF1,FGFR2,HMOX1,ICAM1,IL6,ITGA2,MMP7,MMP9,NT5E,P2RY2,PLAT,PLAU,PTX3,S1PR1,STAT1,THBD,TLR2,TNF,VEGFC	33	13
Cellular Movement	homing of cells	8.66e-13	Increased	2.561	ACKR3,AIMP1,ARTN,C3,CCL2,CCL20,CCL5,CCRL2,CD40,CDKN1A,CSF2,CXCL1,CXCL11,CXCL2,CXCL3,CXCL5,CXCL8,DOCK4,DUSP6,EPHB1,GAB1,HAVCR1,HBEGF,ICAM1,IGFBP3,IL6,INHBA,ITGA2,KITLG,LCP1,LITAF,MAP3K1,MMP14,MMP7,MMP9,NRP2,P2RY2,PLAU,PLAUR,PPIA,RGS3,RHOB,S1PR1,SAA1,SEMA3A,SWAP70,THBD,TLR2,TNF,VAV3,VEGFC,WNT5A	52	14
Hematological System Development and Function, Inflammatory Response, Tissue Morphology	quantity of phagocytes	1.09e-12	Increased	2.28	ARID4A,BCL2A1,C3,CCL2,CCL20,CD40,CD83,CDKN1A,CLEC4E,CSF2,CTSS,CXCL8,F3,GALNT3,GDF15,GPR68,HAVCR1,HBEGF,ICAM1,ID1,IGFBP3,IL6,ITGB6,JARID2,KITLG,LITAF,LTB,MAVS,MMP9,NDFIP1,NFYA,PLAC8,PLAT,PLAU,PTGER2,SERPINB2,SOAT1,SWAP70,THBD,TLR2,TNF,TNFAIP3,VDR	43	11
Cellular Development, Cellular Growth and Proliferation, Organ Development, Skeletal and Muscular System Development and Function, Tissue Development	proliferation of muscle cells	1.31e-12		1.524	ALOX5AP,CCL2,CCL5,CDKN1A,CDKN1C,CXCL8,DNAJB6,EGR1,F3,FGF1,FGFR2,HAS2,HBEGF,HMGA2,HMOX1,IGFBP3,IL6,INHBA,ITGA2,KLF4,MEF2D,MIR17HG,MMP1,MMP14,MMP7,MMP9,NCF2,PAPPA,PLAT,PLAU,PLAUR,PPIA,RGS4,S1PR1,STAT1,THBD,TLR2,TNF,TNFAIP3,XDH	40	16
Cellular Movement, Hematological System Development and Function, Immune Cell Trafficking	cell movement of mononuclear leukocytes	1.66e-12	Increased	2.672	ACKR3,C3,CCL2,CCL20,CCL5,CD40,CSF2,CTSS,CXCL1,CXCL11,CXCL3,CXCL8,DDX58,ETS1,GJB2,HMOX1,ICAM1,IL6,INHBA,KITLG,LCP1,LTB,MAVS,MMP14,MMP9,NLRP3,NT5E,PDCD1LG2,PELI1,PLAU,PLAUR,PPIA,PROCR,RAP1A,S1PR1,SAA1,SEMA3A,SERP1,STAT1,SWAP70,TLR2,TNF,UCP2,VAV3,WNT5A	45	12
Cancer, Cellular Development, Cellular Growth and Proliferation, Organismal Injury and Abnormalities, Tumor Morphology	proliferation of tumor cells	2.08e-12	Increased	3.519	AREG,ARRDC3,CD40,CD82,CDKN1A,CSF2,CTSS,CXCL1,CXCL11,CXCL3,CXCL8,DOCK4,EGR1,F3,FGF1,GALNT3,GDF15,HBEGF,HMGA2,HMOX1,ID1,IGFBP3,IL6,INHBA,KITLG,LITAF,MIR17HG,MMP14,MMP9,PLAT,PLAU,PLAUR,PROCR,PTCH1,PTPN13,RCAN1,RHOB,STAT1,THRB,TLR2,TNF,TPD52,VDR,VEGFC,WNT5A	45	13
Tissue Morphology	quantity of cells	2.22e-12	Increased	3.437	ACKR3,ADD3,ARHGDIB,ARID4A,BCL2A1,BRINP1,C3,CAV2,CCL2,CCL20,CCL5,CCNG1,CD40,CD83,CDKN1A,CHST1,CLEC4E,CSF2,CTSS,CXCL1,CXCL2,CXCL8,CYB5R4,CYLD,DDX58,DUSP6,EGR1,ENTPD7,ETS1,F3,FGF1,FGFR2,GALNT3,GDF15,GDPD5,GPHN,GPR68,HAVCR1,HBEGF,HIPK2,HMOX1,HSPA9,ICAM1,ID1,IGFBP3,IL6,INHBA,ITGB6,JARID2,KITLG,KLF4,KLRC1,LITAF,LTB,MAVS,MIR17HG,MMP14,MMP7,MMP9,NDFIP1,NEFL,NFYA,NLRP3,NRP2,NT5E,PDCD1LG2,PLAC8,PLAT,PLAU,P…	110	27
Tissue Development	accumulation of cells	2.4e-12	Increased	2.318	ACKR3,AIMP1,BCL2A1,C3,CCL2,CCL5,CD40,CDKN1A,CDKN1C,CSF2,CXCL1,CXCL2,CXCL3,CXCL8,EGR1,F3,FGF1,FGFR2,HMOX1,ICAM1,ID1,IL6,ITGA2,MMP7,MMP9,NFYA,NT5E,P2RY2,PLAT,PLAU,PTX3,RHOB,S1PR1,STAT1,THBD,TLR2,TNF,VEGFC	38	16
Inflammatory Response	inflammation of absolute anatomical region	2.8e-12		0.03	ADORA2B,C3,CA13,CA2,CCL2,CCL5,CD40,CDKN1A,CLEC4E,CSF2,CTSS,CXCL1,CXCL2,CXCL3,CXCL5,CXCL8,CYLD,DDX58,EGLN3,EGR1,ELF3,ENTPD7,F3,FBXO32,FGFR2,GUCY1B3,HAVCR1,HBEGF,HMGA2,HMOX1,ICAM1,ID1,IFIH1,IGFBP3,IL6,IRF9,ITGB6,KLF4,KLRC1,KMO,LITAF,LTB,LY96,MAP3K1,MAVS,MIR17HG,MMP7,MMP9,NDFIP1,NLRP3,NT5E,P2RY2,PDCD1LG2,PELI1,PLA2G4A,PLAT,PLAU,PLAUR,PPIA,PROCR,PTGER2,PTGS1,S1PR1,SCG5,SOD2,SPRY2,STARD7,STAT1,STK17B,…	77	20
Cell-To-Cell Signaling and Interaction, Cellular Movement, Hematological System Development and Function, Immune Cell Trafficking, Inflammatory Response	recruitment of neutrophils	3.31e-12	Increased	2.978	ALOX5AP,CCL2,CCL20,CCL5,CLEC4E,CSF2,CXCL1,CXCL2,CXCL3,CXCL5,CXCL8,ICAM1,IL6,LY96,MMP1,MMP9,NLRP3,P2RY2,PTX3,RCAN1,S1PR1,SOD2,TLR2,TNF,VAV3,XDH	26	7
Organismal Injury and Abnormalities, Respiratory Disease	injury of lung	3.72e-12		-0.344	ADORA2B,C3,CCL2,CSF2,CXCL8,CYLD,EGR1,F3,HMOX1,ICAM1,IGFBP3,IL6,MMP7,NLRP3,NT5E,PLA2G4A,PLAUR,PTGS1,PTX3,S1PR1,STAT1,TLR2,TNF	23	9
Cell-To-Cell Signaling and Interaction	activation of cells	4.81e-12	Increased	2.751	ACKR3,ADORA2B,AREG,BCL2A1,BMPER,C1QTNF1,C3,CCL2,CCL5,CD40,CD83,CDKN1A,CLEC4E,CSF2,CTSS,CXCL1,CXCL2,CXCL3,CXCL5,CXCL8,CYLD,DDX58,ETS1,F3,FGF1,GUCY1B3,HAVCR1,HBEGF,HMOX1,ICAM1,ID1,IL6,INHBA,ITGB6,KITLG,KLF4,KLRC1,LAPTM5,LIN7C,LTB,LY96,MMP1,MMP14,MMP9,NDFIP1,NT5E,P2RY2,PDCD1LG2,PELI1,PLA2G4A,PLAT,PLAU,PLAUR,PPIA,PRKAA1,PROCR,PTGER2,RHOB,SAA1,SERPIND1,STARD7,STAT1,STC1,SWAP70,TAB2,THBD,TLR2,TNF,TNFAI…	72	19
Cell-To-Cell Signaling and Interaction, Cellular Movement, Hematological System Development and Function, Immune Cell Trafficking	recruitment of mononuclear leukocytes	5.44e-12	Increased	3.381	CCL2,CCL20,CCL5,CD40,CLEC4E,CSF2,CXCL11,CXCL3,CXCL8,DDX58,ETS1,F3,ICAM1,IL6,NLRP3,PELI1,S1PR1,SEMA3A,TLR2,TNF,VAV3	21	6
Cell Death and Survival	neuronal cell death	7.66e-12		-0.208	AREG,ARTN,CCL2,CCL5,CDKN1A,CXCL1,CXCL3,CXCL8,DUSP6,EGLN3,EGR1,FGF1,FGF5,GDF15,GJB2,HBEGF,HERPUD1,HIPK2,HMOX1,IGFBP3,IL6,INHBA,IRF9,ITGA2,KCNK3,KITLG,MAP3K1,MEF2D,MMP1,MMP7,MMP9,NCF2,NDEL1,NEFL,NLRP3,PLA2G4A,PLAT,PLAU,PPIF,PPP1R9A,PRDX3,PRKAA1,PTCH1,RCAN1,RPS6KA5,SEMA3A,SLC1A3,SNAP25,SOD2,STAT1,TLR2,TMEM158,TNF,UCP2,UNG,WNT5A	56	18
Cellular Movement, Hematological System Development and Function, Immune Cell Trafficking, Inflammatory Response	migration of phagocytes	8.97e-12	Increased	2.5	C3,CCL2,CCL20,CCL5,CD40,CSF2,CTSS,CXCL1,CXCL11,CXCL2,CXCL3,CXCL5,CXCL8,ICAM1,IL6,KITLG,MMP14,MMP7,MMP9,NLRP3,NRP2,PLAU,PLAUR,RHOB,S1PR1,SAA1,SEMA3A,SWAP70,TLR2,TNF,VAV3,WNT5A	32	9
Inflammatory Disease	chronic inflammatory disorder	1.08e-11		0.255	ADORA2B,ADSS,AREG,ARHGDIB,ATP8A1,C1orf106,C3,CCL2,CCL20,CCL5,CCRL2,CD40,CD83,CDA,CDKN1A,CERS6,CLEC4E,CNEP1R1,CSF2,CXCL1,CXCL2,CXCL3,CXCL5,CXCL8,CYLD,F3,FGF1,FGFR2,FZD8,G0S2,HAVCR1,HBEGF,HMOX1,HNRNPA3,ICAM1,IL6,ITGB6,KMO,LCP1,LTB,MAP4K4,MMP1,MMP9,MTHFD2L,NCF2,NLRP3,PLAUR,PROCR,PTGIS,PTGS1,PTPRN2,RPSA,S1PR1,SAA1,SLC7A11,SLFN5,SNAP25,SPRY2,STAT1,STK17B,THBD,THRB,TLR2,TMEM192,TNF,TNFAIP3,TRAF1,VAV3,V…	71	14
Connective Tissue Disorders, Skeletal and Muscular Disorders	arthropathy	1.13e-11	Increased	2.827	ADAMTS9,ADSS,ALOX5AP,AREG,ARHGDIB,ATP8A1,C3,CCL2,CCL20,CCL5,CCRL2,CD40,CD83,CDA,CDKN1A,CERS6,CLEC4E,CNEP1R1,CSF2,CTSS,CXCL1,CXCL2,CXCL3,CXCL5,CXCL8,EGLN3,ELF3,G0S2,HAVCR1,HMOX1,HNRNPA3,ICAM1,IL6,LCP1,LTB,MAP4K4,MMP1,MMP14,MMP9,MTHFD2L,NLRP3,NT5E,PHB2,PLA2G4A,PLAT,PLAU,PLAUR,PTGER2,PTGIS,PTGS1,PTPRN2,RPSA,S1PR1,SAA1,SERPINB2,SLC1A3,SLC7A11,SLFN5,SNAP25,SOD2,STAT1,STK17B,TLR2,TNF,TNFAIP3,TRAF1,VDR,…	70	11
Inflammatory Response	inflammation of organ	1.18e-11		-0.061	ADORA2B,AREG,C3,CA13,CA2,CCL2,CCL20,CCL5,CD40,CDKN1A,CLEC4E,CSF2,CTSS,CXCL1,CXCL2,CXCL3,CXCL5,CXCL8,CYLD,DDX58,EGLN3,EGR1,ELF3,ENTPD7,F3,FBXO32,FGFR2,GUCY1B3,HAVCR1,HBEGF,HMGA2,HMOX1,ICAM1,ID1,IFIH1,IGFBP3,IL6,IRF9,ITGB6,KLF4,KLRC1,KMO,LTB,LY96,MAP3K1,MAVS,MIR17HG,MMP1,MMP7,MMP9,MXI1,NAV3,NDFIP1,NLRP3,NT5E,P2RY2,PDCD1LG2,PELI1,PLA2G4A,PLAT,PLAU,PLAUR,PPIA,PROCR,PTGER2,PTGS1,RPS6KA5,S1PR1,SCG5,SOA…	85	22
Cellular Movement, Hematological System Development and Function, Immune Cell Trafficking	migration of mononuclear leukocytes	1.22e-11	Increased	2.734	ACKR3,C3,CCL2,CCL20,CCL5,CD40,CSF2,CTSS,CXCL1,CXCL11,CXCL3,CXCL8,DDX58,ETS1,ICAM1,IL6,KITLG,LCP1,LTB,MMP14,MMP9,NLRP3,NT5E,PDCD1LG2,PELI1,PLAU,PLAUR,PROCR,RAP1A,S1PR1,SAA1,SEMA3A,SERP1,STAT1,SWAP70,TLR2,TNF,WNT5A	38	11
Connective Tissue Disorders, Inflammatory Disease, Inflammatory Response, Skeletal and Muscular Disorders	inflammation of joint	1.31e-11	Increased	2.66	ADAMTS9,ADSS,ALOX5AP,AREG,ARHGDIB,ATP8A1,C3,CCL2,CCL20,CCL5,CCRL2,CD40,CD83,CDA,CDKN1A,CERS6,CLEC4E,CNEP1R1,CSF2,CTSS,CXCL1,CXCL2,CXCL3,CXCL5,CXCL8,EGLN3,ELF3,G0S2,HAVCR1,HMOX1,HNRNPA3,ICAM1,IL6,LCP1,LTB,MAP4K4,MMP1,MMP14,MMP9,MTHFD2L,NLRP3,PHB2,PLA2G4A,PLAT,PLAU,PLAUR,PTGER2,PTGIS,PTGS1,PTPRN2,RPSA,S1PR1,SAA1,SERPINB2,SLC1A3,SLC7A11,SLFN5,SNAP25,SOD2,STAT1,STK17B,TLR2,TNF,TNFAIP3,TRAF1,VDR,WNT5A…	69	11
Inflammatory Response	immune response of cells	1.37e-11	Increased	2.916	ADORA2B,C3,CCL2,CD40,CD83,CDKN1A,CSF2,CTSS,CXCL1,CXCL3,CXCL8,CYLD,DDX58,ELF3,ETS1,F3,FBXO32,HBEGF,HMOX1,ICAM1,IFIH1,IL6,LITAF,LY96,MAVS,NLRP3,OTUB2,PDCD1LG2,PELI1,PLA2G4A,PLAU,PLAUR,PNP,PRKAA1,PTGER2,PTX3,RAP1A,SAA1,SIRPB1,SOAT1,SPRY2,STAT1,SWAP70,TAP1,THBD,TLR2,TNF,TRIM55,UCP2,WNT5A	50	14
Cell Death and Survival	cell death of epithelial cells	1.46e-11		-0.293	ALDH1A1,BCL2A1,CD40,CDKN1A,CTSS,CXCL3,CXCL8,CYB5R4,CYLD,EGR1,EMP1,F3,FGF1,GDF15,HIPK2,HMOX1,ICAM1,ID1,IGFBP3,IL6,INHBA,MAP3K1,MAVS,MLKL,NDEL1,NLRP3,PLA2G4A,PLAT,PLAU,PLAUR,PRDX3,PRKAA1,PTCH1,PTGIS,PTGS1,RGS4,S1PR1,SAA1,SEMA7A,SOD2,STAT1,TLR2,TNF,TNFRSF19,TRAF1	45	12
Cellular Movement, Hematological System Development and Function, Immune Cell Trafficking	cell movement of granulocytes	1.57e-11	Increased	2.684	ALOX5AP,C3,CCL2,CCL5,CSF2,CXCL1,CXCL11,CXCL2,CXCL3,CXCL5,CXCL8,F3,GDF15,GJB2,HAVCR1,HMOX1,ICAM1,IGFBP3,IL6,MAVS,MMP7,MMP9,NLRP3,NT5E,PLAT,PLAU,PLAUR,PPIA,PROCR,PTX3,SAA1,SWAP70,THBD,TLR2,TNF,TNFAIP3,VAV3,VEGFC	38	12
Cellular Movement, Hematological System Development and Function, Immune Cell Trafficking	transmigration of leukocytes	1.62e-11		1.871	ACKR3,CCL2,CCL5,CD40,CSF2,CTSS,CXCL11,CXCL2,CXCL3,CXCL5,CXCL8,GDF15,ICAM1,KITLG,MMP14,MMP9,PDCD1LG2,RAP1A,STC1,TNF,VAV3	21	6
Organismal Injury and Abnormalities, Tissue Morphology	morphology of lesion	1.63e-11			ARG2,C3,CCNG1,CD40,CDKN1A,CSF2,CTSS,CXCL3,DUSP6,EGR1,F3,GDF15,HMOX1,ICAM1,IL6,MMP1,MMP7,MMP9,NDFIP1,NT5E,PAPPA,PLA2G4A,PLAT,PLAU,PPIA,PPIF,PTGER2,PTX3,RCAN1,SOAT1,STAT1,THBD,TLR2,TNF,TNFAIP3,UCP2,UNG	37	10
Organismal Injury and Abnormalities, Respiratory Disease	damage of lung	1.78e-11		-0.33	ADORA2B,C3,CCL2,CSF2,CXCL8,CYLD,EGR1,F3,HMOX1,ICAM1,IGFBP3,IL6,MMP7,NLRP3,NT5E,PLA2G4A,PLAUR,PTGS1,PTX3,S1PR1,SEMA7A,STAT1,TLR2,TNF	24	9
Cell-To-Cell Signaling and Interaction, Cellular Movement, Hematological System Development and Function, Immune Cell Trafficking	recruitment of lymphocytes	1.82e-11	Increased	2.831	CCL2,CCL20,CCL5,CD40,CLEC4E,CSF2,CXCL11,CXCL3,CXCL8,DDX58,ETS1,ICAM1,IL6,PELI1,S1PR1,TLR2,TNF,VAV3	18	5
Cell-To-Cell Signaling and Interaction, Cellular Growth and Proliferation, Hematological System Development and Function	stimulation of leukocytes	2.21e-11	Increased	3.124	C3,CCL2,CCL20,CCL5,CD40,CD82,CD83,CLEC4E,CSF2,CXCL11,CXCL3,CXCL5,CXCL8,HMOX1,IL6,KITLG,KLRC1,PDCD1LG2,STEAP1,TLR2,TNF,TNFAIP3,WNT5A,XDH	24	6
Gastrointestinal Disease, Inflammatory Disease	gastroenteritis	2.23e-11		-0.898	AREG,C3,CCL2,CD40,CSF2,CXCL2,CXCL3,CXCL5,CXCL8,CYLD,DDX58,EGLN3,FGFR2,HMOX1,ICAM1,IL6,KMO,LTB,LY96,MAVS,MMP7,MMP9,NLRP3,NT5E,PROCR,PTGS1,S1PR1,STAT1,TLR2,TNF,TNFAIP3,VDR	32	12
Cellular Movement, Immune Cell Trafficking	migration of lymphatic system cells	2.23e-11	Increased	2.852	ACKR3,C3,CCL2,CCL20,CCL5,CD40,CSF2,CTSS,CXCL1,CXCL11,CXCL3,CXCL8,DDX58,ETS1,FGF1,ICAM1,IL6,LCP1,LTB,MMP9,NLRP3,NT5E,PDCD1LG2,PELI1,PLAU,PROCR,RAP1A,S1PR1,SAA1,SEMA3A,SERP1,STAT1,SWAP70,TLR2,TNF,VEGFC,WNT5A	37	11
Cardiovascular Disease	occlusion of artery	2.54e-11	Increased	2.002	ADORA2B,ALOX5AP,ARG2,CCL2,CD40,CDKN1A,CERS6,CSF2,CTSS,CXCL2,DOCK4,EGR1,F3,FAM107B,GDF15,HMOX1,ICAM1,IL6,KLF4,LRIG1,MIR17HG,MMP14,MMP9,PAPPA,PLAT,PLAU,PLAUR,PROCR,PTGER2,PTGS1,PTX3,S1PR1,SAA1,SERPIND1,SLC7A11,SOAT1,THBD,TLR2,TNF,TNFAIP3,VAV3,VDR,VEPH1,XDH	44	9
Cancer, Organismal Injury and Abnormalities	growth of malignant tumor	2.97e-11	Increased	3.13	AIMP1,AKR1B10,AREG,CCL2,CD40,CSF2,CTSS,CXCL1,CXCL11,CXCL3,CXCL5,CXCL8,DOCK4,EGR1,FGF1,GALNT3,GDF15,HMGA2,ID1,IGFBP3,IL6,INHBA,KITLG,LITAF,MIR17HG,MMP1,MMP9,NT5E,PLAT,PLAUR,PTCH1,PTPN13,RCAN1,RHOB,STAT1,THRB,TNF,TPD52,VDR,VEGFC,WNT5A	41	13
Cellular Development, Connective Tissue Development and Function, Tissue Development	differentiation of connective tissue	3.03e-11		1.468	ADORA2B,AREG,ATP6V0D2,BMPER,C3,CA2,CCDC85B,CCL2,CCL5,CDKN1A,CSF2,CXCL8,EGLN3,EMP1,ETS1,FGF1,FGFR2,GPR68,HAS2,HIPK2,HMGA2,HMOX1,HSD17B4,HSPA9,ID1,IL6,INHBA,KITLG,KLF4,LAMB3,MEF2D,MMP1,MMP14,MMP9,NFYA,NLRP3,PKDCC,PLAC8,PLAU,PLAUR,PTCH1,PTGER2,RCOR1,SEMA3A,SEMA7A,SFRP4,SFXN1,SIGLEC15,SOD2,STAT1,STC1,TBL1X,THRB,TLR2,TMEM64,TNF,VDR,WNT5A	58	14
Cardiovascular System Development and Function, Cell-To-Cell Signaling and Interaction	activation of endothelial cells	3.16e-11		1.883	BCL2A1,BMPER,C3,F3,HBEGF,ID1,IL6,MMP9,PLAU,PLAUR,PROCR,SAA1,SERPIND1,TLR2,TNF	15	4
Organismal Development	growth of vessel	3.49e-11		1.565	ACKR3,CCL2,CD40,CXCL8,F3,FGF1,GUCY1B3,HBEGF,IL6,INHBA,KITLG,KLF4,MMP14,PLAU,PRKAA1,PTGIS,RAP1A,ROBO4,SOD2,STAT1,TNF,VEGFC,XDH	23	10
Cell Death and Survival	cell death of tumor cell lines	3.69e-11		-1.166	ACKR3,ADORA2B,AIMP1,ANTXR2,AREG,ARID3B,BCL2A1,BRINP1,CCL2,CCNG1,CD40,CD82,CDA,CDKN1A,CDKN1C,CERS6,CSF2,CXCL8,CYLD,DDX58,DUT,EGLN3,EGR1,ETS1,FBXO32,FGF5,FGFR2,G0S2,GAB1,GDF15,GEM,HBEGF,HERPUD1,HIPK2,HMOX1,HSPA9,ID1,IGFBP3,IL6,INHBA,IRAK2,ITGA2,KITLG,KLF4,LRIG1,MAP3K1,MAVS,MCU,MEF2D,MIR17HG,MLKL,MMP14,MMP7,MMP9,MXI1,NLRP3,NT5E,OAS3,PDZK1,PHB2,PLA2G4A,PLAT,PLAU,PLAUR,PLK2,PPIA,PPP2R1B,PRKAA1,PRKAR2B…	97	24
Connective Tissue Development and Function, Tissue Morphology	quantity of connective tissue	3.75e-11		0.84	ADD3,ALDH1A1,AMACR,ARID4A,C3,CCL2,CCNG1,CD83,CDKN1A,CERS6,CSF2,CXCL8,CYB5R4,CYLD,EGR1,FGFR2,GDF15,GPD2,GPR68,HMGA2,HMOX1,ID1,IGFBP3,IL6,INHBA,JARID2,KITLG,KLF4,MFSD2A,MMP14,MMP7,MMP9,NFYA,NT5E,PLAU,PRKAR2B,RCOR1,S1PR1,SIGLEC15,SLC19A2,SOD2,SPRY2,STAT1,STC1,TNF,TRIM55,UCP2,VDR,WNT5A,XDH	50	15
Cancer, Organismal Injury and Abnormalities	advanced malignant tumor	3.77e-11		0.951	ACKR3,ANXA8/ANXA8L1,CCL2,CCL5,CD40,CD82,CDH6,CDKN1A,CSF2,CXCL1,CXCL2,CXCL3,CXCL5,CXCL8,DDX58,DNAJB6,DOCK4,DUSP6,EMP1,ENAH,F3,FGF1,FGFR2,GDF15,HMOX1,ICAM1,ID1,IL6,INHBA,ITGA2,KCNK6,KLF4,LAMB3,LRIG1,LTB,MIR17HG,MMP1,MMP14,MMP7,MMP9,NRP2,NT5E,PAPPA,PLAT,PLAU,PLAUR,PPIA,PTCH1,PTGER2,PTGS1,PTX3,RGS4,RHOB,SEMA3C,SERPINB2,SETBP1,SLC7A11,STAT1,THBD,THRB,TLR2,TNF,UBE2N,VAV3,VEGFC,WNT5A,WSB1	67	19
Cellular Movement, Hematological System Development and Function, Immune Cell Trafficking, Inflammatory Response	cellular infiltration of phagocytes	3.77e-11	Increased	2.215	C3,CCL2,CSF2,EGLN3,GAL3ST1,HAVCR1,HMOX1,ICAM1,IL6,KITLG,LTB,MAVS,MMP9,NLRP3,PLA2G4A,PLAU,PPIA,PTX3,SAA1,STC1,THBD,TLR2,TNF,TNFAIP3,VAV3	25	6
Organismal Development	morphology of body cavity	3.95e-11			ACKR3,ADAMTS9,AMACR,ANTXR2,AREG,ARG2,ARHGDIB,ARID3B,ARID4A,BMPER,C3,CAV2,CCNG1,CD40,CDKN1A,CFI,CLEC4E,CSF2,CYB5R4,CYLD,DDX58,DHRS3,DUSP6,ECE1,EGLN3,EGR1,ELK3,ETS1,F3,FAT4,FGFR2,GDF15,GUCY1B3,HAS2,HBEGF,HMOX1,ID1,IGFBP3,IL6,INHBA,ITGA2,ITGB6,KITLG,KLF4,LAMC2,LIN7C,LTB,MAP3K1,MAVS,MFSD2A,MMP14,MMP9,MXI1,NLRP3,PDZK1,PEX13,PHB2,PKDCC,PLA2G4A,PLAU,PNP,PTGER2,PTGIS,PTGS1,PTX3,RCAN1,RDH10,REC8,RGS4,RPSA…	90	18
Cardiovascular System Development and Function, Organismal Development	vascularization of absolute anatomical region	3.98e-11	Increased	3.487	AIMP1,C3,CD40,CSF2,F3,FGF1,FGFR2,ICAM1,IGFBP3,INHBA,MMP14,MMP7,MMP9,PLA2G4A,PLAT,PLAU,PLAUR,SEMA3A,STC1,TNF,VEGFC	21	6
Cellular Movement, Hematological System Development and Function, Immune Cell Trafficking, Inflammatory Response	chemotaxis of leukocytes	4.08e-11	Increased	3.084	ACKR3,C3,CCL2,CCL20,CCL5,CCRL2,CD40,CDKN1A,CSF2,CXCL1,CXCL11,CXCL2,CXCL3,CXCL5,CXCL8,HAVCR1,ICAM1,IL6,INHBA,KITLG,LCP1,LITAF,MMP7,MMP9,PLAU,PLAUR,PPIA,RHOB,S1PR1,SAA1,SWAP70,TLR2,TNF,VAV3,VEGFC,WNT5A	36	11
Connective Tissue Disorders, Inflammatory Disease, Skeletal and Muscular Disorders	Rheumatic Disease	5.09e-11	Increased	2.497	ADAMTS9,ADSS,ALOX5AP,AREG,ARHGDIB,ATP8A1,C3,CCL2,CCL20,CCL5,CCRL2,CD40,CD83,CDA,CDKN1A,CERS6,CLEC4E,CNEP1R1,CSF2,CTSS,CXCL1,CXCL2,CXCL3,CXCL5,CXCL8,EGLN3,ELF3,FGFR2,G0S2,GAB1,HAVCR1,HMOX1,HNRNPA3,ICAM1,IFIH1,IL6,LCP1,LTB,MAP4K4,MMP1,MMP14,MMP9,MTHFD2L,NCF2,NLRP3,OAS1,PHB2,PLA2G4A,PLAT,PLAU,PLAUR,PTGER2,PTGIS,PTGS1,PTPRN2,RPSA,S1PR1,SAA1,SERPINB2,SLC1A3,SLC7A11,SLFN5,SNAP25,SOD2,STAT1,STK17B,TAP1,…	75	12
Cell-To-Cell Signaling and Interaction	adhesion of tumor cell lines	5.7e-11	Increased	2.138	ADD3,CCL2,CD82,CXCL2,CXCL8,EGR1,EPHB1,ETS1,ETV5,FGFR2,GDF15,ICAM1,IL6,ITGA2,LAMC2,MMP14,P2RY2,PHLDA1,PLAU,PLAUR,RAP1A,RCAN1,RGS3,RPSA,SERPINB2,SFRP4,SRGN,STAT1,THBD,TLR2,TNF,VEGFC	32	11
Organismal Survival	survival of organism	5.83e-11		0.601	ADORA2B,ANTXR2,AREG,ARHGDIB,BCL2A1,C3,CCL2,CCNG1,CD40,CDA,CDKN1A,CSF2,CXCL11,CXCL2,CXCL3,CYLD,DDX58,EGLN3,ELK3,ETS1,F3,HIPK2,HMGA2,HMOX1,ICAM1,ID1,IL6,INHBA,ITGB6,KITLG,LITAF,LY96,MAVS,MIR17HG,MMP14,MMP9,NLRP3,NT5E,PLAT,PNP,PPIF,PTGIS,PTGS1,PTX3,RDH10,SCG5,SEMA3A,SEMA7A,SOD2,STAT1,TAP1,THBD,THRB,TLR2,TNF,TNFAIP3,UCP2	57	14
Cancer, Organismal Injury and Abnormalities	metastasis	7.15e-11		0.951	ACKR3,CCL2,CCL5,CD40,CD82,CDH6,CDKN1A,CSF2,CXCL1,CXCL2,CXCL3,CXCL5,CXCL8,DDX58,DNAJB6,DOCK4,DUSP6,EMP1,ENAH,F3,FGF1,FGFR2,GDF15,HMOX1,ICAM1,ID1,IL6,INHBA,ITGA2,LAMB3,LTB,MIR17HG,MMP1,MMP14,MMP7,MMP9,NRP2,NT5E,PAPPA,PLAT,PLAU,PLAUR,PPIA,PTCH1,PTGER2,PTGS1,PTX3,RGS4,RHOB,SERPINB2,SETBP1,SLC7A11,STAT1,THBD,THRB,TLR2,TNF,UBE2N,VAV3,VEGFC,WNT5A,WSB1	62	18
Cell-To-Cell Signaling and Interaction, Cellular Movement, Hematological System Development and Function, Immune Cell Trafficking	recruitment of antigen presenting cells	1.03e-10	Increased	3.71	CCL2,CCL20,CCL5,CD40,CLEC4E,CSF2,CXCL3,CXCL8,ETS1,F3,ICAM1,MMP9,P2RY2,RHOB,S1PR1,TLR2,TNF,UCP2,VDR	19	5
Cell Death and Survival	cell viability of tumor cell lines	1.04e-10		0.958	ACKR3,AIMP1,ANLN,ANTXR2,ARTN,BCL2A1,CA2,CCL2,CCNG1,CD40,CD82,CDKN1A,CDKN1C,COPB2,CSF2,CTDSPL,CXCL1,CXCL2,CXCL3,CXCL8,DNAJB6,DUSP6,ELF3,FGFR2,GAB1,GDF15,GPR180,HBEGF,HMGA2,HMOX1,IGFBP3,IL6,KITLG,KLF4,LRIG1,MAP3K1,MIR17HG,PHB2,PLAT,PLAU,PLAUR,PLK2,PPP1R9A,PPP2R1B,PRKAA1,PTPN13,PTPRN2,RCAN1,RPSA,SCG5,SERPINB2,SKA1,SOD2,STC1,TERF1,THBD,TNF,USP36,VEGFC,XDH	60	15
Infectious Diseases	infection of mammalia	1.12e-10		-1.877	ANTXR2,BCL2A1,C3,CD40,CLEC4E,CSF2,CXCL3,CYLD,DDX58,ENTPD7,HMOX1,IFIH1,IL6,IRF9,KLRC1,LCP1,LTB,LY96,MAVS,MMP7,MMP9,NLRP3,PDCD1LG2,PLAC8,PLAU,PLAUR,PTPN13,PTX3,SLAMF8,STAT1,TAP1,TLR2,TNF,UCP2	34	7
Hematological System Development and Function, Tissue Morphology	quantity of mononuclear leukocytes	1.26e-10	Increased	2.75	ACKR3,ARHGDIB,ARID4A,BCL2A1,C3,CCL2,CCL5,CD40,CD83,CDKN1A,CLEC4E,CSF2,CTSS,CXCL8,CYLD,DDX58,EGR1,ENTPD7,ETS1,F3,FGFR2,GALNT3,GPR68,ICAM1,ID1,IGFBP3,IL6,INHBA,ITGB6,JARID2,KITLG,KLF4,KLRC1,LTB,MAVS,MIR17HG,MMP9,NDFIP1,NLRP3,PDCD1LG2,PLAU,PNP,PPIA,PTPN13,SAA1,SERPINB2,SLC6A6,STARD7,STAT1,STK17B,TAP1,TLR2,TNF,TNFAIP3,TRAF1,VAV3,VDR	57	18
Cellular Movement, Hematological System Development and Function, Immune Cell Trafficking, Inflammatory Response	infiltration by neutrophils	1.38e-10		1.452	ALOX5AP,C3,CXCL2,CXCL3,CXCL5,CXCL8,GJB2,HAVCR1,HMOX1,ICAM1,IL6,MAVS,MMP9,NLRP3,NT5E,PLAT,PROCR,PTX3,THBD,TLR2,TNF,TNFAIP3,VAV3	23	6
Cellular Movement, Hematological System Development and Function, Immune Cell Trafficking	cell movement of antigen presenting cells	1.38e-10	Increased	2.105	C3,CCL2,CCL20,CCL5,CCRL2,CD40,CDKN1A,CSF2,CXCL1,CXCL11,CXCL8,EGLN3,GAL3ST1,HAVCR1,HMOX1,ICAM1,LITAF,LTB,MAVS,MMP7,NLRP3,NRP2,PLA2G4A,PLAU,PTX3,RHOB,S1PR1,SAA1,STC1,SWAP70,THBD,TLR2,TNF,TNFAIP3,WNT5A	35	8
Organismal Development	abnormal morphology of body cavity	1.75e-10			ACKR3,ADAMTS9,AMACR,ANTXR2,AREG,ARHGDIB,ARID3B,ARID4A,BMPER,C3,CAV2,CCNG1,CD40,CDKN1A,CFI,CLEC4E,CSF2,CYB5R4,CYLD,DDX58,DHRS3,ECE1,EGLN3,EGR1,ELK3,ETS1,F3,FAT4,FGFR2,GDF15,GUCY1B3,HAS2,HBEGF,HMOX1,ID1,IGFBP3,IL6,ITGB6,KLF4,LAMC2,LIN7C,LTB,MAP3K1,MAVS,MFSD2A,MMP14,MMP9,MXI1,PDZK1,PEX13,PHB2,PKDCC,PLA2G4A,PLAU,PTGER2,PTGIS,PTGS1,PTX3,RCAN1,RDH10,REC8,RPSA,SCG5,SEMA3A,SLC6A6,SOAT1,SOD2,SPRY2,STAT1,T…	79	15
Cellular Movement, Skeletal and Muscular System Development and Function	cell movement of vascular smooth muscle cells	2.09e-10	Increased	2.205	ALOX5AP,CCL2,CCL5,CSF2,CXCL8,EGR1,HAS2,HMOX1,IL6,PAPPA,PLA2G4A,PLAU,PLAUR,PPIA,RCAN1,S1PR1,TLR2,TNF	18	4
Cardiovascular Disease	Infarction	2.24e-10		0.284	ADORA2B,C3,CD40,DUSP6,EGR1,F3,GDF15,GUCY1B3,HMOX1,IL6,KCNK3,KITLG,MMP9,NCF2,NDFIP1,NEFL,NT5E,PLA2G4A,PLAT,PPIA,PPIF,PROCR,PTGER2,PTGS1,PTX3,RCAN1,SOAT1,STAT1,THBD,THRB,TLR2,TNF,TNFAIP3,UCP2,UNG	35	9
Cellular Movement, Hematological System Development and Function, Immune Cell Trafficking	cellular infiltration by granulocytes	2.32e-10		1.899	ALOX5AP,C3,CCL5,CSF2,CXCL2,CXCL3,CXCL5,CXCL8,GJB2,HAVCR1,HMOX1,ICAM1,IL6,MAVS,MMP9,NLRP3,NT5E,PLAT,PPIA,PROCR,PTX3,THBD,TLR2,TNF,TNFAIP3,VAV3	26	6
Cellular Development, Cellular Growth and Proliferation	cell proliferation of tumor cell lines	2.46e-10		1.971	ACKR3,ADORA2B,AKR1B10,ALDH1A1,AMACR,AREG,ARID4A,ARRDC3,ARTN,BRINP1,CCL2,CCL20,CD40,CDKN1A,CDKN1C,COPB2,CSF2,CXCL1,CXCL8,DDX58,DNAJB6,DUSP6,EGR1,ELF3,EMP1,ENAH,ETS1,F3,FBXO32,FGF1,FGF5,FGFR2,GAB1,GDF15,HAS2,HBEGF,HIPK2,HMGA2,HMOX1,ID1,IGFBP3,IL6,ILF3,INHBA,ITGA2,KITLG,KLF4,LCP1,LRIG1,MAP4K4,MIR17HG,MMP1,MMP14,MMP7,MMP9,MXI1,NDFIP1,NR2F6,NRP2,OAS3,P2RY2,PHLDA1,PLA2G4A,PLAT,PLAU,PLAUR,PPIF,PRKAR2B,P…	97	24
Gastrointestinal Disease, Inflammatory Disease	enteritis	2.5e-10		-1.122	AREG,C3,CCL2,CD40,CSF2,CXCL2,CXCL3,CXCL5,CXCL8,CYLD,DDX58,EGLN3,FGFR2,ICAM1,IL6,LTB,LY96,MMP7,MMP9,NLRP3,NT5E,PROCR,PTGS1,S1PR1,STAT1,TLR2,TNF,TNFAIP3,VDR	29	11
Cell Morphology	morphology of cells	2.52e-10			ABHD5,ADD3,AREG,ARID4A,ATP6V0D2,BRINP1,C3,CAV2,CCL2,CD40,CDKN1A,CDKN1C,CERS6,COL13A1,COL17A1,CSF2,CXCL11,CXCL8,CYB5R4,CYLD,DDX58,DNAJB6,DNER,DPY30,ECE1,EGLN3,EGR1,EPHB1,ETS1,ETV5,F3,FGF1,FGFR2,GAB1,GAL3ST1,GALNT3,GDF15,GEM,GPHN,HAS2,HBEGF,HMGA2,HOOK3,HSD17B4,ICAM1,ID1,IGFBP3,IL6,ILF3,INHBA,ITGB6,JTB,KITLG,KLF4,LCP1,LTB,MAP3K1,MFSD2A,MMP14,MMP9,MPP4,MXI1,NDEL1,NEFL,NFYA,NLRP3,NRP2,PEX13,PHLDA1,PIS…	117	21
Hematological System Development and Function, Immune Cell Trafficking, Inflammatory Response, Tissue Development	accumulation of antigen presenting cells	2.71e-10		1.885	ACKR3,AIMP1,CCL2,CCL5,CD40,CSF2,FGF1,FGFR2,HMOX1,NT5E,PLAT,PLAU,PTX3,STAT1,TNF,VEGFC	16	4
Cardiovascular System Development and Function	function of cardiovascular system	2.77e-10		-0.307	ACKR3,ADORA2B,ARG2,C3,CDKN1A,CTSS,ELK3,F3,FBXO32,GAB1,GDF15,HBEGF,HMOX1,ICAM1,ID1,IL6,ITGA2,KITLG,MAP3K1,MFSD2A,MMP1,MMP9,NT5E,PLAT,PLAU,PTGS1,RDH10,SLC6A6,THBD,TLR2,TNF,TNFAIP3,TRIM55,VAV3,VDR,XDH	36	9
Cellular Movement	cell movement of epithelial cells	2.89e-10		1.018	CD82,COL17A1,CXCL1,CXCL11,CXCL2,CXCL8,GAB1,HAS2,HBEGF,ICAM1,IL6,ITGA2,MMP1,MMP14,MMP9,PLAUR,RGS4,S1PR1,SEMA6D,SERPINB2,TNF	21	7
Cardiovascular System Development and Function	vascularization	2.97e-10	Increased	3.203	AIMP1,C3,CD40,CSF2,CXCL3,F3,FGF1,FGFR2,HOXA13,ICAM1,ID1,IGFBP3,INHBA,MMP14,MMP7,MMP9,NRP2,PLA2G4A,PLAT,PLAU,PLAUR,SEMA3A,STC1,TLR2,TNF,TNFAIP3,VEGFC	27	8
Cellular Movement, Hematological System Development and Function, Immune Cell Trafficking	Lymphocyte migration	3.03e-10	Increased	2.423	ACKR3,C3,CCL2,CCL20,CCL5,CD40,CSF2,CTSS,CXCL1,CXCL11,CXCL3,CXCL8,DDX58,ETS1,ICAM1,IL6,LCP1,LTB,NLRP3,NT5E,PDCD1LG2,PELI1,PLAU,PROCR,RAP1A,S1PR1,SAA1,SEMA3A,SERP1,STAT1,SWAP70,TLR2,TNF,WNT5A	34	9
Cardiovascular Disease	atherosclerosis	3.13e-10	Increased	2.101	ADORA2B,ALOX5AP,ARG2,CCL2,CD40,CDKN1A,CERS6,CSF2,CTSS,CXCL2,DOCK4,EGR1,F3,FAM107B,GDF15,HMOX1,ICAM1,IL6,KLF4,LRIG1,MIR17HG,MMP14,MMP9,PAPPA,PLAT,PLAU,PLAUR,PTGS1,PTX3,S1PR1,SAA1,SERPIND1,SLC7A11,SOAT1,THBD,TLR2,TNF,TNFAIP3,VDR,VEPH1,XDH	41	9
Organismal Injury and Abnormalities, Tissue Morphology	size of lesion	3.39e-10			ARG2,C3,CD40,CDKN1A,CSF2,CTSS,CXCL3,DUSP6,EGR1,F3,GDF15,HMOX1,ICAM1,IL6,MMP1,MMP9,NDFIP1,NT5E,PAPPA,PLA2G4A,PLAT,PPIA,PPIF,PTGER2,PTX3,RCAN1,SOAT1,STAT1,THBD,TLR2,TNFAIP3,UCP2,UNG	33	9
Lipid Metabolism, Small Molecule Biochemistry	synthesis of lipid	3.52e-10	Increased	2.087	ABHD5,ACSM3,ADORA2B,ALDH1A1,ALOX5AP,AMACR,AREG,C1QTNF1,C3,CAV2,CCL2,CCL5,CD40,CD82,CD83,CERS6,CHPT1,CNEP1R1,CSF2,CXCL1,CXCL3,CXCL8,EGR1,ERLIN2,FGF1,GAL3ST1,GDF15,HMOX1,IL6,INHBA,KCNK3,KITLG,MAP3K1,ME1,MMP9,PIGV,PISD,PLA2G4A,PLAU,PRKAA1,PTGER2,PTGIS,PTGS1,PTX3,RDH10,RGS3,S1PR1,SEMA3A,SLC1A3,SLC6A6,SOAT1,STC1,TLR2,TNF	54	8
Cellular Movement, Skeletal and Muscular System Development and Function	migration of vascular smooth muscle cells	3.61e-10		1.977	ALOX5AP,CCL2,CCL5,CSF2,CXCL8,EGR1,HAS2,HMOX1,IL6,PAPPA,PLAU,PLAUR,PPIA,RCAN1,S1PR1,TLR2,TNF	17	4
Cellular Function and Maintenance	cellular homeostasis	3.91e-10	Increased	2.236	ABHD5,ACBD5,ADCY7,ADORA2B,BCL2A1,C1QTNF1,C3,CA2,CCL2,CCL20,CCL5,CD40,CD83,CDKN1A,CLEC4E,CSF2,CXCL1,CXCL2,CXCL3,CXCL5,CXCL8,CYB5R4,CYLD,DAP,EGR1,ELF3,ETS1,F3,FGF1,FGF5,FZD8,GAB1,GPD2,HERPUD1,HMOX1,ICAM1,ID1,IGFBP3,IL4I1,IL6,INHBA,KCNJ16,KCNK1,KITLG,KLF4,LTB,MCU,MIR17HG,MMP1,NDFIP1,NR2F6,NT5E,NUCKS1,OAS1,P2RY2,PDCD1LG2,PHB2,PLA2G4A,PLAU,PLK2,PNP,PPIA,PPIF,PRDX3,PRKAA1,PROCR,PTCH1,PTGER2,PTGS1,RAP1A…	96	20
Cellular Growth and Proliferation, Tissue Development	generation of cells	4.12e-10	Increased	2.178	ADCY7,ADORA2B,AIMP1,AREG,ARHGAP22,ARHGDIB,ARID4A,ARTN,BCL2A1,BMPER,C3,CAV2,CCL2,CCL5,CD40,CD83,CDKN1A,CLEC4E,CSF2,CXCL1,CXCL11,CXCL2,CXCL5,CXCL8,CYLD,DNER,ECE1,EGR1,ELF3,ENAH,EPHB1,ETS1,ETV5,F3,FGF1,FGF5,FGFR2,FZD8,GAB1,GAL3ST1,GDPD5,GEM,GPHN,HBEGF,HIPK2,HMOX1,HOXA13,HSD17B4,ICAM1,ID1,IL4I1,IL6,INHBA,ITGA2,KITLG,KLF4,LTB,MAP3K1,MAP4K4,MIR17HG,MMP1,MMP14,MMP9,NDEL1,NDFIP1,NEFL,NFYA,NR2F6,NRP2,PDCD…	115	23
Cellular Movement, Hematological System Development and Function, Immune Cell Trafficking, Inflammatory Response	cell movement of macrophages	4.14e-10	Increased	2.367	C3,CCL2,CCL5,CDKN1A,CSF2,CXCL1,CXCL8,EGLN3,GAL3ST1,HAVCR1,HMOX1,ICAM1,LITAF,LTB,MAVS,MMP7,NLRP3,PLA2G4A,PLAU,PTX3,RHOB,S1PR1,SAA1,STC1,THBD,TLR2,TNF,TNFAIP3,WNT5A	29	8
Cellular Development, Connective Tissue Development and Function, Tissue Development	differentiation of connective tissue cells	4.51e-10		1.922	ADORA2B,AREG,ATP6V0D2,BMPER,C3,CA2,CCDC85B,CCL2,CCL5,CDKN1A,CSF2,CXCL8,EGLN3,FGF1,FGFR2,GPR68,HAS2,HMGA2,HMOX1,HSD17B4,ID1,IL6,INHBA,KITLG,KLF4,LAMB3,MEF2D,MMP1,MMP14,MMP9,NLRP3,PKDCC,PLAC8,PLAU,PLAUR,PTCH1,PTGER2,SEMA3A,SEMA7A,SFRP4,SIGLEC15,SOD2,STAT1,STC1,TBL1X,THRB,TLR2,TMEM64,TNF,VDR,WNT5A	51	13
Gastrointestinal Disease, Inflammatory Disease, Inflammatory Response	colitis	5.58e-10		-0.801	C3,CCL2,CD40,CSF2,CXCL2,CXCL3,CXCL5,CXCL8,CYLD,DDX58,EGLN3,FGFR2,ICAM1,IL6,LTB,LY96,MMP7,MMP9,NLRP3,NT5E,PROCR,PTGS1,S1PR1,STAT1,TLR2,TNF,TNFAIP3,VDR	28	11
Cellular Movement, Hematological System Development and Function, Immune Cell Trafficking, Inflammatory Response	cell movement of neutrophils	5.6e-10	Increased	2.442	ALOX5AP,C3,CCL2,CCL5,CSF2,CXCL1,CXCL2,CXCL3,CXCL5,CXCL8,GJB2,HAVCR1,HMOX1,ICAM1,IL6,MAVS,MMP7,MMP9,NLRP3,NT5E,PLAT,PLAU,PROCR,PTX3,SAA1,THBD,TLR2,TNF,TNFAIP3,VAV3,VEGFC	31	10
Cellular Movement, Hematological System Development and Function, Immune Cell Trafficking	transmigration of mononuclear leukocytes	5.81e-10	Increased	2.548	ACKR3,CCL2,CCL5,CD40,CSF2,CTSS,CXCL11,CXCL8,ICAM1,KITLG,MMP14,MMP9,PDCD1LG2,RAP1A,TNF	15	5
Inflammatory Response	inflammation of body cavity	6.23e-10		-0.684	ADORA2B,C3,CCL2,CCL5,CD40,CDKN1A,CSF2,CTSS,CXCL1,CXCL2,CXCL3,CXCL5,CXCL8,CYLD,DDX58,EGLN3,EGR1,ELF3,F3,FBXO32,FGFR2,GUCY1B3,HAVCR1,HBEGF,HMGA2,HMOX1,ICAM1,IFIH1,IGFBP3,IL6,ITGB6,KLRC1,KMO,LTB,LY96,MAP3K1,MAVS,MMP7,MMP9,NDFIP1,NLRP3,NT5E,P2RY2,PDCD1LG2,PLA2G4A,PLAT,PLAU,PLAUR,PPIA,PROCR,PTGS1,S1PR1,SCG5,SOD2,SPRY2,STARD7,STAT1,TLR2,TNF,TNFAIP3,VAV3,VDR,XDH	63	17
Cell-To-Cell Signaling and Interaction, Hematological System Development and Function	activation of blood cells	7.29e-10	Increased	2.34	ADORA2B,C1QTNF1,C3,CCL2,CCL5,CD40,CD83,CDKN1A,CLEC4E,CSF2,CTSS,CXCL1,CXCL3,CXCL5,CXCL8,DDX58,ETS1,F3,FGF1,GUCY1B3,HAVCR1,HMOX1,ICAM1,IL6,INHBA,ITGB6,KITLG,KLF4,KLRC1,LAPTM5,LTB,LY96,MMP1,MMP9,NDFIP1,NT5E,PDCD1LG2,PELI1,PLAT,PPIA,PRKAA1,PTGER2,RHOB,SAA1,STARD7,STAT1,SWAP70,TAB2,THBD,TLR2,TNF,TNFAIP3,UBE2N,VAV3,WNT5A	55	16
Immunological Disease	systemic autoimmune syndrome	7.36e-10		0.045	ADSS,ALOX5AP,AREG,ARHGDIB,ATP8A1,C3,CA2,CCL2,CCL20,CCL5,CCRL2,CD40,CD83,CDA,CERS6,CLEC4E,CNEP1R1,CSF2,CTSS,CTSW,CXCL1,CXCL2,CXCL3,CXCL5,CXCL8,ENAH,ETS1,G0S2,HAVCR1,HMOX1,HNRNPA3,ICAM1,IFI44,IFIH1,IL6,KMO,LCP1,LTB,MAP4K4,MMP1,MMP9,MTHFD2L,NCF2,NT5E,OAS1,PDCD1LG2,PLAUR,PTGIS,PTGS1,PTPRN2,RPSA,S1PR1,SAA1,SIRPB1,SLC7A11,SLFN5,SOD2,STAT1,STK17B,TAP1,TLR2,TNF,TNFAIP3,TRAF1,UCP2,VDR,WNT5A,XDH,ZNF165,ZNR…	71	11
Cell Death and Survival	apoptosis of blood cells	7.62e-10		0.459	AIMP1,BCL2A1,CCL2,CCL5,CD40,CDKN1A,CSF2,CXCL1,CXCL2,CXCL8,CYLD,EGR1,ETS1,HIPK2,HSPA9,ICAM1,IL6,KITLG,KLF4,LRIG1,MIR17HG,NFYA,NLRP3,PDCD1LG2,PLA2G4A,PLAT,PNP,PPIA,RCAN1,SLC6A6,SOAT1,SOD2,STAT1,STK17B,SWAP70,TLR2,TNF,TNFAIP3,TRAF1,VAV3,VDR,WNT5A	42	14
Cell Signaling, Small Molecule Biochemistry	synthesis of nitric oxide	8.88e-10		0.834	ADORA2B,ARG2,CD40,CSF2,HBEGF,HMOX1,ICAM1,IGFBP3,IL6,KLF4,MAP3K1,P2RY2,PLAU,PRKAA1,PTGER2,PTGIS,PTX3,RPSA,S1PR1,SEMA3A,SOD2,STAT1,STC2,TLR2,TNF,TNFAIP3,UCP2,WNT5A,XDH	29	7
Cellular Movement	cell movement of carcinoma cell lines	1.09e-09	Increased	2.401	AREG,CCL2,CCL5,CD82,CSF2,CXCL3,CXCL8,DDX58,DOCK4,EPHB1,ETS1,HMGA2,HMOX1,ID1,IL6,ITGA2,ITGB6,MMP1,MMP7,NRP2,PODXL,TLR2,TNF,VEGFC,WNT5A	25	11
Cardiovascular Disease, Organismal Injury and Abnormalities, Tissue Morphology	size of infarct	1.09e-09			C3,CD40,DUSP6,EGR1,GDF15,HMOX1,IL6,MMP9,NDFIP1,NT5E,PLA2G4A,PLAT,PPIA,PPIF,PTGER2,RCAN1,STAT1,THBD,TLR2,TNFAIP3,UCP2,UNG	22	6
Hematological System Development and Function, Immune Cell Trafficking, Inflammatory Response, Tissue Development	accumulation of granulocytes	1.11e-09	Increased	3.282	BCL2A1,CCL2,CCL5,CXCL1,CXCL2,CXCL3,CXCL8,EGR1,F3,FGFR2,ITGA2,MMP7,MMP9,P2RY2,PTX3,THBD,TNF	17	10
Cell-To-Cell Signaling and Interaction	aggregation of cells	1.14e-09		-0.168	ADAMTS18,ADORA2B,C1QTNF1,C3,CCL5,CD40,CDKN1A,EPHB1,F3,GDF15,GUCY1B3,HBEGF,ICAM1,IL6,ITGA2,KITLG,MMP1,MMP14,MMP7,MMP9,PLA2G4A,PLAT,PTGER2,PTX3,SEMA3A,SLC7A11,THBD,TLR2,TNF,VAV3,VDR,WNT5A	32	9
Cardiovascular Disease, Hematological Disease	Thrombosis	1.2e-09		-0.792	C3,CFI,F3,GDF15,GUCY1B3,HBEGF,HMOX1,IL6,MMP7,NT5E,PLA2G4A,PLAT,PLAU,PROCR,PTGER2,PTGS1,SERPIND1,THBD,TLR2,TNF,TRIM55,VEGFC	22	4
Cancer, Cellular Development, Cellular Growth and Proliferation, Organismal Injury and Abnormalities, Tumor Morphology	proliferation of cancer cells	1.37e-09	Increased	2.89	AREG,CD40,CSF2,CTSS,CXCL1,CXCL11,CXCL3,CXCL8,DOCK4,EGR1,FGF1,GALNT3,GDF15,HMGA2,ID1,IGFBP3,IL6,INHBA,KITLG,LITAF,MIR17HG,MMP9,PLAT,PLAUR,PTPN13,RCAN1,RHOB,STAT1,THRB,TNF,TPD52,VDR,VEGFC,WNT5A	34	11
Cellular Movement	cell movement of breast cancer cell lines	1.4e-09		1.654	ARHGDIB,ARRDC3,CCL2,CCL5,CXCL11,CXCL5,CXCL8,DNAJB6,ENAH,ETS1,FGF1,FGFR2,GAB1,ID1,IGFBP3,IL6,ILF3,ITGA2,KLF4,LRIG1,MAP4K4,MMP14,MMP9,PLAU,PLAUR,RAP1A,SEMA3A,THRB,VAV3,WNT5A	30	12
Cellular Growth and Proliferation, Connective Tissue Development and Function, Tissue Development	proliferation of connective tissue cells	1.41e-09		1.193	AIMP1,AREG,CCL2,CCNG1,CD40,CDKN1A,CSF2,CXCL3,CXCL8,FGF1,FGFR2,GEM,HAS2,HBEGF,HMOX1,IGFBP3,IL6,INHBA,KITLG,KLF4,LRIG1,MAP3K1,MMP14,MMP7,MMP9,NFYA,PLAT,PLAU,PLAUR,PLK2,PRKAA1,PRKAR2B,PTCH1,PTGER2,RHOB,SAA1,SLC7A11,SOD2,SPRY2,STAT1,STC1,THRB,TNF,VAV3,VDR,WNT5A,XDH	47	13
Cancer, Organismal Injury and Abnormalities, Tumor Morphology	invasion of tumor	1.43e-09	Increased	3.425	AREG,CCL2,CD82,CDKN1C,CTSS,ETS1,F3,GAB1,GDF15,HBEGF,HMOX1,ICAM1,ID1,IL6,ITGA2,KLF4,MMP1,MMP14,MMP9,PLAU,PLAUR,RHOB,THRB,VAV3,VEGFC,WNT5A	26	12
Cancer, Organismal Injury and Abnormalities	invasion of tissue	1.44e-09		1.832	ACKR3,ALDH1A1,CCL2,CXCL8,ENAH,ETS1,FGFR2,GAB1,GEM,HAS2,INHBA,MAP4K4,MMP1,MMP14,MMP7,MMP9,PLAU,RGS4,SP100,THBD,TNF,VEGFC,XDH	23	9
Gastrointestinal Disease, Inflammatory Disease, Inflammatory Response	ulcerative colitis	1.45e-09			CCL2,CD40,CXCL2,CXCL3,CXCL5,CXCL8,FGFR2,ICAM1,IL6,MMP9,NLRP3,PROCR,PTGS1,S1PR1,TLR2,TNF,VDR	17	6
Cellular Development, Cellular Growth and Proliferation, Hematological System Development and Function, Hematopoiesis, Lymphoid Tissue Structure and Development, Tissue Development	development of leukocytes	1.48e-09		0.838	ADCY7,ADORA2B,ARID4A,BCL2A1,C3,CCL2,CCL5,CD40,CD83,CDKN1A,CLEC4E,CSF2,CXCL1,CXCL11,CXCL5,CYLD,EGR1,ELF3,EPHB1,ETS1,FZD8,HMOX1,ICAM1,ID1,IL4I1,IL6,INHBA,KITLG,KLF4,LTB,MIR17HG,MMP14,NDFIP1,NFYA,NR2F6,PDCD1LG2,PHB2,PNP,PRKAA1,PTGS1,S1PR1,SOAT1,STAT1,TAB2,TLR2,TNF,TNFAIP3,UBE2N,VAV3,WNT5A	50	14
Cardiovascular Disease	atherosclerotic lesion	1.49e-09		-0.686	ARG2,CCL2,CD40,CSF2,CTSS,CXCL2,EGR1,F3,HMOX1,ICAM1,MMP9,PAPPA,PLAU,PTX3,SERPIND1,SOAT1,THBD,TLR2,TNFAIP3,VDR	20	6
Cell-To-Cell Signaling and Interaction, Hematological System Development and Function, Immune Cell Trafficking, Inflammatory Response	activation of phagocytes	1.53e-09	Increased	2.448	ADORA2B,C3,CCL2,CCL5,CD40,CLEC4E,CSF2,CXCL1,CXCL3,CXCL5,CXCL8,HAVCR1,HMOX1,ICAM1,IL6,INHBA,ITGB6,KITLG,KLF4,LTB,LY96,MMP9,PELI1,PLAT,PPIA,PTGER2,SAA1,STARD7,STAT1,TLR2,TNF,UBE2N,VAV3,WNT5A	34	9
Cell-To-Cell Signaling and Interaction, Inflammatory Response	immune response of leukocytes	1.53e-09	Increased	3.68	C3,CCL2,CD40,CSF2,CTSS,CXCL1,CXCL3,CXCL8,DDX58,ETS1,F3,HMOX1,ICAM1,IL6,LY96,PDCD1LG2,PLAU,PLAUR,PNP,PRKAA1,PTX3,SAA1,SIRPB1,SOAT1,SWAP70,TAP1,THBD,TLR2,TNF,UCP2,WNT5A	31	9
Cell-To-Cell Signaling and Interaction, Hematological System Development and Function, Immune Cell Trafficking	adhesion of granulocytes	1.65e-09		1.69	C3,CSF2,CXCL1,CXCL2,CXCL3,CXCL8,GDF15,ICAM1,IL6,LCP1,PLAU,PLAUR,SWAP70,THBD,TLR2,TNF,VAV3	17	4
Cardiovascular System Development and Function	neovascularization of organ	1.65e-09	Increased	2.757	AIMP1,C3,F3,FGF1,FGFR2,ICAM1,IGFBP3,INHBA,MMP7,MMP9,PLA2G4A,PLAT,PLAU,PLAUR,SEMA3A,TNF,VEGFC	17	6
Cell-To-Cell Signaling and Interaction, Cellular Growth and Proliferation	stimulation of cells	1.69e-09	Increased	3.292	C3,CCL2,CCL20,CCL5,CD40,CD82,CD83,CLEC4E,CSF2,CXCL11,CXCL3,CXCL5,CXCL8,HBEGF,HMOX1,IGFBP3,IL6,INHBA,KITLG,KLF4,KLRC1,PDCD1LG2,PLAU,PTGER2,STEAP1,TLR2,TNF,TNFAIP3,WNT5A,XDH	30	8
Developmental Disorder	Hypertrophy	1.71e-09		-0.911	C3,CA2,CDKN1A,CSF2,ECE1,EMP1,FBXO32,GDF15,HBEGF,HMOX1,ICAM1,IL6,INHBA,KLF4,MEF2D,MMP1,MMP7,MMP9,MTPN,NT5E,PIGV,PLA2G4A,PLAT,PLAU,PPIA,PRDX3,PRKAA1,PTGIS,RCAN1,RGS4,SEMA3A,SOD2,STC1,TLR2,TNF,TNFAIP3,TRIM55,VAV3,VDR,WNT5A	40	9
Organismal Injury and Abnormalities	Wound	1.74e-09		1.452	AIMP1,C3,CSF2,EGR1,ELK3,ETS1,FGF1,FGFR2,HBEGF,ICAM1,IL6,MAP3K1,MMP7,MMP9,PLA2G4A,PLAT,PLAU,PTGS1,SERPINB2,SOD2,THBD,TLR2,TNF,VDR,WNT5A	25	7
Cellular Development, Cellular Growth and Proliferation	proliferation of blood cells	1.77e-09		-0.547	ARHGDIB,BCL2A1,C3,CCL2,CCL20,CCL5,CD40,CD83,CDKN1A,CDKN1C,CSF2,CXCL2,CXCL3,CXCL8,CYLD,EGR1,EPHB1,ETS1,GDF15,HAVCR1,HIPK2,HMOX1,HSPA9,ICAM1,IL4I1,IL6,INHBA,ISG20,KITLG,KLF4,LAPTM5,LCP1,LY96,MAP3K1,MAVS,MIR17HG,MMP9,MXI1,NDFIP1,NT5E,PDCD1LG2,PELI1,PLAU,PNP,PPIA,RCAN1,RPS6KA5,S1PR1,SETBP1,STAT1,STK17B,SWAP70,TLR2,TNF,TNFAIP3,TRAF1,UBE2N,VAV3,VDR,XDH	60	16
Hematological System Development and Function, Lymphoid Tissue Structure and Development, Tissue Morphology	quantity of lymphocytes	1.8e-09	Increased	2.392	ACKR3,ARHGDIB,ARID4A,BCL2A1,C3,CCL2,CCL5,CD40,CD83,CDKN1A,CLEC4E,CSF2,CTSS,CYLD,DDX58,EGR1,ENTPD7,ETS1,F3,FGFR2,ICAM1,ID1,IGFBP3,IL6,INHBA,ITGB6,KITLG,KLF4,KLRC1,LTB,MAVS,MIR17HG,MMP9,NDFIP1,NLRP3,PDCD1LG2,PLAU,PNP,PPIA,PTPN13,SAA1,SERPINB2,SLC6A6,STARD7,STAT1,STK17B,TAP1,TLR2,TNF,TNFAIP3,TRAF1,VAV3,VDR	53	17
Cardiovascular System Development and Function	neovascularization	2.01e-09	Increased	3.064	AIMP1,C3,CD40,CSF2,F3,FGF1,FGFR2,ICAM1,IGFBP3,INHBA,MMP14,MMP7,MMP9,PLA2G4A,PLAT,PLAU,PLAUR,SEMA3A,TNF,TNFAIP3,VEGFC	21	7
Cell-To-Cell Signaling and Interaction, Cellular Movement, Hematological System Development and Function, Immune Cell Trafficking, Inflammatory Response	recruitment of monocytes	2.43e-09	Increased	2.375	CCL2,CCL20,CCL5,CSF2,CXCL3,CXCL8,F3,ICAM1,NLRP3,SEMA3A,TNF,VAV3	12	3
Cardiovascular System Development and Function, Cell-To-Cell Signaling and Interaction	binding of endothelial cells	2.59e-09		1.966	C3,CCL2,CCL5,CXCL11,CXCL8,F3,FGF1,HAS2,ICAM1,IL6,ITGA2,KITLG,NT5E,PLAUR,S1PR1,TNF	16	6
Cellular Movement	migration of breast cancer cell lines	2.71e-09		1.759	ARHGDIB,ARRDC3,CCL2,CCL5,CXCL11,CXCL5,CXCL8,DNAJB6,ENAH,ETS1,FGF1,FGFR2,GAB1,ID1,IGFBP3,IL6,ILF3,KLF4,MAP4K4,MMP14,MMP9,PLAU,PLAUR,RAP1A,SEMA3A,THRB,WNT5A	27	11
Cell-To-Cell Signaling and Interaction, Hematological System Development and Function, Immune Cell Trafficking, Inflammatory Response	activation of myeloid cells	2.73e-09	Increased	2.188	ADORA2B,C3,CCL2,CCL5,CD40,CLEC4E,CSF2,CXCL1,CXCL3,CXCL5,CXCL8,HAVCR1,HMOX1,ICAM1,IL6,INHBA,ITGB6,KITLG,KLF4,LY96,MMP9,PELI1,PLAT,PPIA,PTGER2,SAA1,STAT1,TLR2,TNF,UBE2N,VAV3,WNT5A	32	9
Connective Tissue Disorders, Immunological Disease, Inflammatory Disease, Inflammatory Response, Skeletal and Muscular Disorders	rheumatoid arthritis	2.77e-09			ADSS,AREG,ARHGDIB,ATP8A1,C3,CCL2,CCL20,CCL5,CCRL2,CD40,CD83,CDA,CERS6,CLEC4E,CNEP1R1,CSF2,CXCL1,CXCL2,CXCL3,CXCL5,CXCL8,G0S2,HAVCR1,HMOX1,HNRNPA3,ICAM1,IL6,LCP1,LTB,MAP4K4,MMP1,MMP9,MTHFD2L,PLAUR,PTGIS,PTGS1,PTPRN2,RPSA,S1PR1,SAA1,SLC7A11,SLFN5,STAT1,STK17B,TLR2,TNF,TNFAIP3,TRAF1,VDR,WNT5A,ZSCAN31	51	10
Gastrointestinal Disease, Inflammatory Response	inflammation of intestine	2.89e-09		-1.556	ADORA2B,C3,CCL2,CD40,CSF2,CXCL2,CXCL3,CXCL5,CXCL8,CYLD,DDX58,EGLN3,FGFR2,ICAM1,IL6,LTB,LY96,MMP7,MMP9,NLRP3,NT5E,PROCR,PTGS1,S1PR1,STAT1,TLR2,TNF,TNFAIP3,VDR	29	11
Connective Tissue Development and Function, Tissue Development	growth of connective tissue	2.92e-09		0.772	AIMP1,AREG,CCL2,CCNG1,CD40,CD83,CDKN1A,CSF2,CXCL3,CXCL8,FGF1,FGFR2,GEM,HAS2,HBEGF,HIPK2,HMOX1,IGFBP3,IL6,INHBA,KITLG,KLF4,LRIG1,MAP3K1,MMP14,MMP7,MMP9,NFYA,PLAT,PLAU,PLAUR,PLK2,PRKAA1,PRKAR2B,PTCH1,PTGER2,RHOB,SAA1,SLC7A11,SOD2,SPRY2,STAT1,STC1,THRB,TNF,VAV3,VDR,WNT5A,XDH	49	13
Hematological System Development and Function, Tissue Morphology	quantity of antigen presenting cells	3.13e-09		1.518	BCL2A1,CCL2,CCL20,CD40,CD83,CLEC4E,CSF2,CTSS,GDF15,GPR68,HAVCR1,HBEGF,IL6,ITGB6,LITAF,LTB,MAVS,MMP9,NFYA,PLAT,PLAU,PTGER2,SOAT1,THBD,TLR2,TNF,TNFAIP3,VDR	28	5
Cell-To-Cell Signaling and Interaction	adhesion of blood cells	3.26e-09		1.741	BMPER,C3,CCL2,CCL20,CCL5,CD40,CD83,CSF2,CXCL1,CXCL11,CXCL2,CXCL3,CXCL8,F3,GDF15,ICAM1,IL6,ITGA2,KITLG,LCP1,NT5E,PLAU,PLAUR,PODXL,PROCR,PTX3,RHOB,SAA1,STAT1,SWAP70,THBD,TLR2,TNF,VAV3	34	9
Inflammatory Response, Respiratory Disease	inflammation of respiratory system component	3.39e-09		1.067	ADORA2B,C3,CCL2,CCL5,CSF2,CTSS,CXCL1,CXCL3,CXCL8,CYLD,EGR1,ELF3,FGFR2,HMGA2,HMOX1,ICAM1,IGFBP3,IL6,ITGB6,KLRC1,LY96,MMP9,NDFIP1,NLRP3,NT5E,P2RY2,PLA2G4A,PLAT,PLAU,PTGS1,STARD7,STAT1,SWAP70,TLR2,TNF,VAV3,VDR	37	10
Cellular Movement, Hematological System Development and Function	cell movement of hematopoietic progenitor cells	3.43e-09		1.8	CCL2,CCL20,CCL5,CSF2,CXCL11,CXCL5,CXCL8,ICAM1,KITLG,LCP1,MMP9,S1PR1,SEMA3A,TNF	14	4
Cellular Movement, Hematological System Development and Function, Immune Cell Trafficking	influx of leukocytes	3.43e-09	Increased	2.308	CCL2,CXCL1,CXCL2,CXCL3,CXCL5,IL6,LY96,MMP9,P2RY2,PLAT,PLAUR,PTX3,TLR2,TNF	14	5
Cancer, Endocrine System Disorders, Organismal Injury and Abnormalities, Reproductive System Disease	gonadal tumor	3.46e-09		1.414	ADAMTS9,ADORA2B,AFF3,ALDH1A1,ANLN,ANXA8/ANXA8L1,ARG2,ARID3B,ARL5B,ATP8A1,CCL2,CDKN1A,CNOT6,CORO2B,CSF2,CTDSPL,CXCL1,CXCL11,CXCL8,DNAJB6,ELF3,ENTPD7,EPHB1,ERLIN2,F3,FAT4,FGF1,FGF5,FGFR2,FHDC1,GDF15,GLCCI1,HAS2,HAVCR1,HBEGF,HMGA2,IFIH1,IGFBP3,IL6,INHBA,ITIH5,KCNK6,KITLG,LAPTM5,LCLAT1,LRIG1,MAP3K1,MFSD2A,MMP1,MMP14,MMP7,MMP9,MYO10,NAV3,NHSL1,NLRP3,NRP2,NT5E,NTM,OAS3,P2RY2,PHLDA1,PHLDB2,PISD,PLAU,PLA…	95	14
Cardiovascular System Development and Function, Organismal Development, Visual System Development and Function	neovascularization of eye	3.89e-09	Increased	2.74	AIMP1,C3,F3,FGFR2,ICAM1,IGFBP3,INHBA,MMP7,MMP9,PLA2G4A,PLAT,PLAU,PLAUR,SEMA3A,TNF,VEGFC	16	6
Cardiovascular System Development and Function, Organismal Development, Visual System Development and Function	vascularization of eye	3.97e-09	Increased	2.901	AIMP1,C3,F3,FGFR2,ICAM1,IGFBP3,INHBA,MMP14,MMP7,MMP9,PLA2G4A,PLAT,PLAU,PLAUR,SEMA3A,TNF,VEGFC	17	6
Skeletal and Muscular System Development and Function	function of muscle	4.06e-09		-0.632	ADORA2B,CAV2,CDKN1A,DUSP6,F3,FBXO32,GAB1,GDF15,HBEGF,HMOX1,ICAM1,IGFBP3,IL6,INHBA,MAP3K1,MIR17HG,MMP14,MMP9,MTPN,PAPPA,PLAT,PLAU,PTGER2,SLC6A6,SOD2,STC1,TLR2,TNF,TRIM55,VAV3,VDR,XDH	32	6
Lymphoid Tissue Structure and Development, Tissue Morphology	quantity of lymphatic system cells	4.12e-09	Increased	2.708	ACKR3,ARHGDIB,ARID4A,BCL2A1,C3,CCL2,CCL5,CD40,CD83,CDKN1A,CLEC4E,CSF2,CTSS,CYLD,DDX58,EGR1,ENTPD7,ETS1,F3,FGFR2,ICAM1,ID1,IGFBP3,IL6,INHBA,ITGB6,KITLG,KLF4,KLRC1,LTB,MAVS,MIR17HG,MMP9,NDFIP1,NLRP3,PDCD1LG2,PLAU,PNP,PPIA,PTPN13,RCAN1,SAA1,SERPINB2,SLC6A6,SOD2,STARD7,STAT1,STK17B,TAP1,TLR2,TNF,TNFAIP3,TRAF1,VAV3,VDR	55	17
Cell Death and Survival	cell death of endothelial cells	4.29e-09		1.217	AIMP1,ARG2,CDKN1A,CXCL8,DUSP6,FGF1,HMOX1,IGFBP3,IL6,ISM1,ITGA2,MMP9,PLAT,PPIA,PROCR,RHOB,SEMA3A,SEMA6A,THBD,TNF,TNFAIP3,UCP2,XDH	23	8
Cell Death and Survival	cell death of connective tissue cells	4.36e-09		-0.047	BCL2A1,CCNG1,CD40,CDKN1A,CXCL8,CYLD,DDX58,EGR1,ETS1,FGFR2,GAB1,GALNT3,HAS2,HBEGF,HIPK2,HMOX1,ID1,IGFBP3,LTB,MAP3K1,MAVS,MLKL,MMP14,MMP9,NLRP3,PLA2G4A,PLAC8,PPP2R1B,PRKAA1,PRKAR2B,RHOB,RPS6KA5,S1PR1,SAA1,SERPINB2,SFRP4,SOD2,STAT1,STC1,STK17B,TNF,TNFAIP3,TRAF1,UNG,VDR,XDH	46	15
Cell-To-Cell Signaling and Interaction, Hematological System Development and Function, Immune Cell Trafficking, Inflammatory Response	adhesion of phagocytes	4.48e-09	Increased	2.553	C3,CCL2,CCL5,CSF2,CXCL1,CXCL2,CXCL3,CXCL8,F3,ICAM1,IL6,KITLG,LCP1,PLAU,PLAUR,RHOB,TLR2,TNF,VAV3	19	7
Cancer, Endocrine System Disorders, Organismal Injury and Abnormalities, Reproductive System Disease	Ovarian Cancer and Tumors	4.87e-09		1.89	ADAMTS9,AFF3,ALDH1A1,ANLN,ANXA8/ANXA8L1,ARG2,ARID3B,ATP8A1,CCL2,CDKN1A,CNOT6,CORO2B,CSF2,CTDSPL,CXCL1,CXCL11,CXCL8,DNAJB6,ELF3,ENTPD7,EPHB1,ERLIN2,F3,FAT4,FGF1,FGF5,FGFR2,FHDC1,GDF15,GLCCI1,HAS2,HAVCR1,HBEGF,HMGA2,IFIH1,IGFBP3,IL6,INHBA,ITIH5,KCNK6,LAPTM5,LCLAT1,LRIG1,MAP3K1,MFSD2A,MMP1,MMP14,MMP7,MMP9,MYO10,NAV3,NHSL1,NLRP3,NRP2,NT5E,NTM,OAS3,P2RY2,PHLDA1,PHLDB2,PISD,PLAU,PLAUR,PODXL,PTGER2,PTGI…	92	13
Organismal Development	abnormal morphology of abdomen	4.94e-09			AMACR,ANTXR2,AREG,ARHGDIB,ARID4A,BMPER,C3,CCNG1,CD40,CDKN1A,CFI,CSF2,CYB5R4,CYLD,DDX58,EGLN3,EGR1,ETS1,FAT4,FGFR2,GDF15,GUCY1B3,HMOX1,IGFBP3,IL6,KLF4,LAMC2,LIN7C,LTB,MAVS,MFSD2A,MMP14,MMP9,MXI1,PDZK1,PEX13,PHB2,PKDCC,PLA2G4A,PLAU,PTGER2,PTGIS,PTGS1,PTX3,RDH10,REC8,RPSA,SCG5,SERP1,SOAT1,SOD2,SPRY2,STAT1,TAB2,TLR2,TNF,TRIM55,UNG,VDR,WNT5A,XDH	61	13
Cell-To-Cell Signaling and Interaction, Hematological System Development and Function, Immune Cell Trafficking, Inflammatory Response	activation of macrophages	5.35e-09	Increased	2.396	ADORA2B,C3,CCL2,CCL5,CD40,CLEC4E,CSF2,CXCL5,CXCL8,HAVCR1,HMOX1,ICAM1,IL6,INHBA,ITGB6,KLF4,MMP9,PELI1,PLAT,PTGER2,STAT1,TLR2,TNF,UBE2N,WNT5A	25	7
Cellular Movement	influx of cells	6.03e-09	Increased	2.507	CCL2,CXCL1,CXCL2,CXCL3,CXCL5,IL6,LY96,MMP9,P2RY2,PLAT,PLAUR,PRKAA1,PTX3,TLR2,TNF	15	6
Cell Death and Survival	apoptosis of leukocytes	6.38e-09		-0.11	AIMP1,BCL2A1,CCL2,CCL5,CD40,CDKN1A,CSF2,CXCL1,CXCL2,CXCL8,CYLD,EGR1,ETS1,ICAM1,IL6,KITLG,KLF4,LRIG1,MIR17HG,NLRP3,PDCD1LG2,PLA2G4A,PLAT,PNP,RCAN1,SLC6A6,SOAT1,SOD2,STAT1,STK17B,SWAP70,TLR2,TNF,TNFAIP3,TRAF1,VAV3,VDR,WNT5A	38	14
Cellular Development, Cellular Growth and Proliferation, Hematological System Development and Function	proliferation of immune cells	6.83e-09		-0.327	ARHGDIB,BCL2A1,C3,CCL2,CCL20,CCL5,CD40,CD83,CDKN1A,CSF2,CXCL2,CXCL3,CXCL8,CYLD,EGR1,EPHB1,ETS1,HAVCR1,HMOX1,ICAM1,IL4I1,IL6,INHBA,ISG20,KITLG,KLF4,LAPTM5,LCP1,LY96,MAP3K1,MAVS,MIR17HG,MMP9,MXI1,NDFIP1,NT5E,PDCD1LG2,PELI1,PLAU,PNP,PPIA,RCAN1,RPS6KA5,S1PR1,SETBP1,STAT1,STK17B,SWAP70,TLR2,TNF,TNFAIP3,TRAF1,UBE2N,VAV3,VDR,XDH	56	15
Cell-To-Cell Signaling and Interaction, Inflammatory Response	immune response of phagocytes	6.91e-09	Increased	3.262	C3,CCL2,CSF2,CXCL1,CXCL3,CXCL8,DDX58,F3,HMOX1,ICAM1,IL6,LY96,PLAU,PLAUR,PRKAA1,PTX3,SAA1,SIRPB1,SOAT1,TLR2,TNF,UCP2,WNT5A	23	8
Cellular Movement, Hematological System Development and Function	migration of hematopoietic progenitor cells	7e-09		1.684	CCL20,CCL5,CSF2,CXCL11,CXCL5,CXCL8,ICAM1,KITLG,MMP9,S1PR1,SEMA3A,TNF	12	3
Cell-To-Cell Signaling and Interaction, Hematological System Development and Function	aggregation of blood cells	7.12e-09		-0.227	ADAMTS18,ADORA2B,C1QTNF1,C3,CCL5,CD40,EPHB1,F3,GDF15,GUCY1B3,ICAM1,IL6,ITGA2,KITLG,MMP1,PLA2G4A,PLAT,PTGER2,PTX3,SEMA3A,SLC7A11,TLR2,TNF,VAV3,VDR	25	5
Cell-To-Cell Signaling and Interaction	binding of cells	7.62e-09		1.538	AREG,C3,CCL2,CCL20,CCL5,CD40,CD82,CD83,CHST1,CSF2,CXCL1,CXCL11,CXCL2,CXCL3,CXCL8,F3,FGF1,GAL3ST1,HAS2,HAVCR1,ICAM1,IGFBP3,IL6,INHBA,ITGA2,KITLG,LY96,NT5E,PLAU,PLAUR,PTX3,RGS3,RHOB,RPSA,S1PR1,SEMA3A,THBD,TLR2,TNF	39	9
Cancer, Organismal Injury and Abnormalities, Tumor Morphology	invasion of malignant tumor	8.19e-09	Increased	2.478	CCL2,CD82,CDKN1C,ETS1,F3,GDF15,HMOX1,ICAM1,ID1,IL6,ITGA2,KLF4,MMP9,PLAU,PLAUR,RHOB,THRB,VAV3,WNT5A	19	10
Cell-To-Cell Signaling and Interaction, Inflammatory Response	response of phagocytes	8.28e-09	Increased	3.306	C3,CCL2,CCL5,CSF2,CXCL1,CXCL3,CXCL8,DDX58,F3,HMOX1,ICAM1,IL6,LY96,PLAU,PLAUR,PRKAA1,PTX3,SAA1,SIRPB1,SOAT1,TLR2,TNF,UCP2,WNT5A	24	8
Cell-To-Cell Signaling and Interaction, Cell-mediated Immune Response, Cellular Movement, Hematological System Development and Function, Immune Cell Trafficking	recruitment of T lymphocytes	8.71e-09	Increased	2.651	CCL2,CCL20,CCL5,CD40,CSF2,CXCL11,CXCL3,CXCL8,DDX58,ETS1,ICAM1,PELI1,TNF	13	4
Cell-To-Cell Signaling and Interaction, Cellular Growth and Proliferation, Hematological System Development and Function	stimulation of mononuclear leukocytes	8.89e-09	Increased	2.45	C3,CCL2,CCL20,CD40,CD82,CD83,CLEC4E,CSF2,CXCL11,HMOX1,IL6,KITLG,KLRC1,PDCD1LG2,STEAP1,TNF,TNFAIP3,XDH	18	4
Cellular Movement	migration of epithelial cells	1.01e-08		1.061	CD82,COL17A1,CXCL1,CXCL2,CXCL8,HAS2,HBEGF,ICAM1,IL6,ITGA2,MMP1,MMP14,MMP9,RGS4,SEMA6D,SERPINB2,TNF	17	7
Cell-To-Cell Signaling and Interaction, Hematological System Development and Function, Immune Cell Trafficking, Inflammatory Response	activation of leukocytes	1.05e-08	Increased	2.385	ADORA2B,C3,CCL2,CCL5,CD40,CD83,CDKN1A,CLEC4E,CSF2,CTSS,CXCL1,CXCL3,CXCL5,CXCL8,DDX58,ETS1,FGF1,HAVCR1,HMOX1,ICAM1,IL6,INHBA,ITGB6,KITLG,KLF4,KLRC1,LAPTM5,LTB,LY96,MMP9,NDFIP1,NT5E,PDCD1LG2,PELI1,PLAT,PPIA,PRKAA1,PTGER2,RHOB,SAA1,STARD7,STAT1,SWAP70,TAB2,TLR2,TNF,TNFAIP3,UBE2N,VAV3,WNT5A	50	14
Cell Death and Survival	cell death of blood cells	1.09e-08	Increased	2.112	AIMP1,ANTXR2,BCL2A1,C3,CCL2,CCL5,CD40,CDKN1A,CSF2,CXCL1,CXCL2,CXCL8,CYLD,EGR1,ETS1,HIPK2,HMOX1,HSPA9,ICAM1,IFIH1,IL6,INHBA,KITLG,KLF4,LRIG1,MIR17HG,NCF2,NFYA,NLRP3,PDCD1LG2,PLA2G4A,PLAT,PNP,PPIA,PRKAA1,RCAN1,SERPINB2,SLC6A6,SOAT1,SOD2,STAT1,STK17B,SWAP70,TLR2,TNF,TNFAIP3,TRAF1,VAV3,VDR,WNT5A	50	15
Cardiovascular Disease	Hypertension	1.1e-08		-1.137	ADORA2B,AFF3,APOL3,ARL5B,C12orf49,CA13,CA2,CCL2,CSF2,DNAJB6,DNAJB9,ECE1,F3,FAT4,FBXO32,FGF1,GAB1,GDF15,GUCY1B3,HAVCR1,HMOX1,ICAM1,IL6,JARID2,KCNK3,LRIG1,MMP1,MMP7,MMP9,MYO10,OLFML2A,PLAT,PTGIS,PTGS1,ROBO4,SEMA5B,SLCO4C1,SNAP25,SOAT1,SPOCD1,THBD,TNF,TSPAN2,VAV3,VDR,VEGFC,VEPH1,ZNF362	48	7
Cellular Movement, Hematological System Development and Function, Immune Cell Trafficking, Inflammatory Response	cellular infiltration by macrophages	1.13e-08	Increased	2.138	C3,CCL2,CSF2,EGLN3,GAL3ST1,HAVCR1,HMOX1,ICAM1,LTB,MAVS,NLRP3,PLA2G4A,PLAU,PTX3,SAA1,STC1,THBD,TLR2,TNF,TNFAIP3	20	3
Cell-To-Cell Signaling and Interaction	response of myeloid cells	1.18e-08	Increased	3.061	C3,CCL2,CSF2,CXCL1,CXCL3,CXCL8,DDX58,F3,HMOX1,ICAM1,IL6,LY96,PLAU,PLAUR,PRKAA1,PTX3,SAA1,SIRPB1,SOAT1,TLR2,TNF,UCP2,WNT5A	23	8
Cell-To-Cell Signaling and Interaction, Hematological System Development and Function, Immune Cell Trafficking, Inflammatory Response	adhesion of neutrophils	1.2e-08	Increased	2.64	C3,CSF2,CXCL1,CXCL2,CXCL3,CXCL8,ICAM1,IL6,LCP1,PLAU,PLAUR,TLR2,TNF,VAV3	14	4
Cellular Growth and Proliferation	colony formation of cells	1.2e-08		-0.271	ACKR3,ALDH1A1,AREG,CCL2,CD82,CDA,CDKN1A,CSF2,CXCL3,DOCK4,EGR1,ELF3,ETS1,FGFR2,HAS2,HMGA2,HMOX1,HSPA9,ID1,IFIH1,IGFBP3,IL6,KITLG,KLF4,MAP3K1,MMP14,MMP9,PHLDA1,PLAU,PTX3,RCAN1,RHOB,RPS6KA5,SOD2,SPRY2,THRB,TLR2,TNF,TPD52,VAV3	40	12
Cardiovascular System Development and Function, Cellular Development, Cellular Growth and Proliferation, Organ Development, Skeletal and Muscular System Development and Function, Tissue Development	proliferation of vascular smooth muscle cells	1.33e-08	Increased	2.211	ALOX5AP,CCL2,CDKN1A,CDKN1C,CXCL8,HAS2,HBEGF,HMOX1,IL6,KLF4,MIR17HG,MMP9,NCF2,PAPPA,PLAUR,PPIA,TLR2,TNF,XDH	19	7
Embryonic Development, Organismal Development	development of body trunk	1.4e-08		0.681	ACKR3,ALDH1A1,AREG,ARID3B,BMPER,CAV2,CCL2,CCL5,CD40,CD83,CDH6,CDKN1A,CSF2,CTSS,CXCL3,CYLD,DHRS3,DNAJB6,DUSP6,ECE1,EGR1,ELK3,ETS1,FAT4,FGF1,FGFR2,FILIP1L,FZD8,GAB1,GDF15,GEM,HAS2,HBEGF,HMOX1,HOXA13,ICAM1,ID1,IL6,INHBA,ITGA2,ITGB6,JARID2,KITLG,LIN7C,LTB,MAP3K1,MIR17HG,MMP14,MMP9,NRP2,PCSK5,PHB2,PKDCC,PLAT,PLAU,PTCH1,PTGER2,PTPRN2,RDH10,RGS4,S1PR1,SCG5,SEMA3A,SEMA3C,SOD2,SPRY2,TAB2,THBD,TLR2,TNF,TRI…	75	14
Cellular Movement, Hematological System Development and Function, Immune Cell Trafficking, Inflammatory Response	chemotaxis of phagocytes	1.49e-08	Increased	3.108	C3,CCL2,CCL20,CCL5,CCRL2,CDKN1A,CSF2,CXCL1,CXCL2,CXCL3,CXCL5,CXCL8,HAVCR1,ICAM1,INHBA,KITLG,LITAF,MMP7,PLAU,PLAUR,PPIA,RHOB,SAA1,SWAP70,TLR2,TNF,VAV3,VEGFC	28	8
Cellular Growth and Proliferation, Lymphoid Tissue Structure and Development	proliferation of lymphatic system cells	1.5e-08		0.175	ARHGDIB,BCL2A1,C3,CCL2,CCL20,CCL5,CD40,CD83,CDKN1A,CSF2,CXCL3,CXCL8,CYLD,EGR1,EPHB1,ETS1,FGF1,HAVCR1,HMOX1,ICAM1,IGFBP3,IL4I1,IL6,INHBA,ISG20,KITLG,KLF4,LAPTM5,LCP1,LY96,MAP3K1,MAVS,MIR17HG,MMP9,MXI1,NDFIP1,NT5E,PDCD1LG2,PELI1,PLAU,PNP,RCAN1,RPS6KA5,S1PR1,SETBP1,STAT1,STK17B,SWAP70,TLR2,TNF,TNFAIP3,TRAF1,UBE2N,VAV3,VDR	55	15
Cellular Movement, Hematological System Development and Function, Immune Cell Trafficking, Inflammatory Response	migration of neutrophils	1.55e-08		1.985	CCL5,CSF2,CXCL1,CXCL2,CXCL3,CXCL5,CXCL8,ICAM1,IL6,MMP7,MMP9,NLRP3,PLAU,SAA1,TNF,VAV3	16	6
Cellular Movement, Hematological System Development and Function, Immune Cell Trafficking, Inflammatory Response	chemotaxis of peripheral blood leukocytes	1.65e-08		0.861	ACKR3,CCL2,CCL20,CCL5,LCP1,PLAUR,PPIA,TLR2,TNF	9	1
Cell-To-Cell Signaling and Interaction, Cellular Movement	attraction of cells	1.74e-08	Increased	2.565	ARTN,C3,CCL2,CCL20,CCL5,CSF2,CXCL1,CXCL11,CXCL3,CXCL5,CXCL8,KITLG,RGS3,SEMA3A,TNF,VEGFC	16	5
Cellular Development, Cellular Growth and Proliferation, Hematological System Development and Function, Hematopoiesis, Lymphoid Tissue Structure and Development, Tissue Development	development of mononuclear leukocytes	1.76e-08		1.057	ADCY7,ADORA2B,BCL2A1,C3,CCL5,CD40,CD83,CDKN1A,CLEC4E,CSF2,CXCL1,CXCL11,CXCL5,CYLD,EGR1,ELF3,EPHB1,ETS1,FZD8,ICAM1,ID1,IL4I1,IL6,INHBA,KITLG,KLF4,LTB,MIR17HG,MMP14,NDFIP1,NR2F6,PDCD1LG2,PHB2,PNP,PRKAA1,PTGS1,S1PR1,STAT1,TAB2,TLR2,TNF,TNFAIP3,UBE2N,VAV3,WNT5A	45	13
Cell-To-Cell Signaling and Interaction, Hematological System Development and Function, Immune Cell Trafficking	adhesion of immune cells	1.95e-08		1.953	BMPER,C3,CCL2,CCL20,CCL5,CD40,CD83,CSF2,CXCL1,CXCL11,CXCL2,CXCL3,CXCL8,F3,GDF15,ICAM1,IL6,KITLG,LCP1,NT5E,PLAU,PLAUR,PODXL,PROCR,RHOB,STAT1,SWAP70,THBD,TLR2,TNF,VAV3	31	8
Cellular Growth and Proliferation	colony formation	2.17e-08		-0.482	ACKR3,ALDH1A1,AREG,CCL2,CD82,CDA,CDKN1A,CSF2,CXCL3,DOCK4,EGR1,ELF3,ETS1,F3,FGFR2,HAS2,HMGA2,HMOX1,HSPA9,ID1,IFIH1,IGFBP3,IL6,KITLG,KLF4,MAP3K1,MMP14,MMP9,PHLDA1,PLAU,PTX3,RCAN1,RHOB,RPS6KA5,SOD2,SPRY2,THRB,TLR2,TNF,TPD52,UBE2N,VAV3	42	13
Digestive System Development and Function	abnormal morphology of digestive system	2.28e-08			AMACR,AREG,ARID4A,C3,CCNG1,CDKN1A,CSF2,CYB5R4,CYLD,DDX58,ECE1,EGLN3,FAT4,FGFR2,GUCY1B3,IGFBP3,IL6,INHBA,KLF4,LAMC2,LTB,MFSD2A,MMP14,MMP9,PDZK1,PKDCC,PLAU,PTGS1,RDH10,RPSA,SCG5,SFRP4,SLC39A13,SOAT1,SOD2,SPRY2,STAT1,TAB2,TLR2,TNF,TRIM55,VDR,WNT5A	43	10
Cancer, Organismal Injury and Abnormalities, Tumor Morphology	progression of tumor	2.28e-08		1.183	ACKR3,CCL5,CDKN1A,CSF2,CXCL8,F3,FGFR2,GDF15,IL6,MMP1,MMP9,NRP2,PLAU,PLAUR,STAT1,THBD,TLR2,TNF,VEGFC,WNT5A	20	10
Hematological System Development and Function, Immune Cell Trafficking, Inflammatory Response, Tissue Development	accumulation of neutrophils	2.32e-08	Increased	2.963	CCL2,CXCL1,CXCL2,CXCL3,CXCL8,EGR1,F3,FGFR2,ITGA2,MMP7,MMP9,PTX3,TNF	13	10
Lipid Metabolism, Small Molecule Biochemistry	fatty acid metabolism	2.37e-08		1.562	ACSM3,ALOX5AP,AREG,ATP8A1,CAV2,CCL2,CCL5,CD40,CD82,CD83,CERS6,CSF2,CTSS,CXCL1,CXCL3,CXCL8,EGR1,ERLIN2,GAL3ST1,GDF15,HMOX1,HSD17B4,IL6,KITLG,MAP3K1,ME1,MFSD2A,MMP7,PAPPA,PLA2G4A,PRKAR2B,PTCH1,PTGER2,PTGIS,PTGR2,PTGS1,S1PR1,SAA1,SEMA3A,SLC1A3,SOAT1,SUCLA2,TLR2,TNF	44	7
Cancer, Endocrine System Disorders, Organismal Injury and Abnormalities, Reproductive System Disease	ovarian cancer	2.57e-08			AFF3,ALDH1A1,ANLN,ANXA8/ANXA8L1,ARG2,ARID3B,ATP8A1,CCL2,CDKN1A,CNOT6,CORO2B,CSF2,CTDSPL,CXCL11,CXCL8,DNAJB6,ELF3,ENTPD7,ERLIN2,F3,FAT4,FGF1,FGF5,FGFR2,FHDC1,GDF15,GLCCI1,HAS2,HAVCR1,HBEGF,HMGA2,IFIH1,IGFBP3,IL6,INHBA,ITIH5,KCNK6,LAPTM5,LCLAT1,LRIG1,MAP3K1,MFSD2A,MMP1,MMP14,MMP7,MMP9,MYO10,NAV3,NHSL1,NLRP3,NRP2,NTM,OAS3,P2RY2,PHLDA1,PHLDB2,PISD,PLAU,PLAUR,PODXL,PTGER2,PTGIS,PTGS1,PTPRN2,PTPRR,RGS3…	88	12
Organismal Injury and Abnormalities, Reproductive System Disease	endometriosis	2.69e-08			CAV2,CCL2,CXCL5,CXCL8,EGR1,ELL2,G0S2,GUCY1B3,HMGA2,HSD17B4,ICAM1,ID1,IL6,INHBA,ISG20,MMP1,MMP14,MMP7,MMP9,PLA2G4A,PLAUR,PLCB4,PLK2,PTGER2,PTGS1,PTPRR,SFRP4,SLC6A6,SPRY2,STC1,TNF,TRAF1,VEGFC	33	9
Inflammatory Response, Respiratory Disease	inflammation of lung	2.69e-08		0.754	ADORA2B,C3,CCL2,CSF2,CTSS,CXCL1,CXCL3,CYLD,EGR1,ELF3,FGFR2,HMGA2,HMOX1,ICAM1,IGFBP3,IL6,ITGB6,KLRC1,LY96,MMP9,NDFIP1,NLRP3,NT5E,P2RY2,PLA2G4A,PLAT,PLAU,PTGS1,STARD7,STAT1,TLR2,TNF,VAV3	33	9
Nucleic Acid Metabolism, Small Molecule Biochemistry	synthesis of purine nucleotide	2.7e-08		-0.303	ADORA2B,ADSS,G0S2,GBAS,GUCY1B3,HMOX1,IL6,MCU,ME1,MEF2D,NT5E,OAS1,PNP,PPIF,PRPS2,PTGIS,SOAT1,SOD2,TNF,UCP2	20	1
Gene Expression	binding of DNA	3.07e-08		-0.745	AIMP1,CD40,CDKN1A,CSF2,CXCL5,CXCL8,DDX58,EGR1,ETS1,FGF1,FZD8,HBEGF,HIPK2,ID1,IGFBP3,IL6,IRF9,ITGA2,KITLG,MAP3K1,NFKBIE,NFYA,NR2F6,OAS1,PELI1,PLAU,PPIA,PTGER2,RHOB,RPS6KA5,S1PR1,SOAT1,SOD2,SP100,STAT1,THRB,TNF,TNFAIP3,UBE2N,VDR	40	14
Cell Cycle	cell cycle progression	3.14e-08		-1.553	ACKR3,ADORA2B,ANLN,AREG,BCL2A1,BRINP1,CCNG1,CD40,CDKN1A,CDKN1C,CSF2,CXCL8,CYLD,DDX58,EGR1,EMP1,ETS1,FGF1,FGFR2,GAB1,GDPD5,GEM,HAS2,HBEGF,HIPK2,HMOX1,HOXA13,HSPA9,ID1,IGFBP3,IL6,INHBA,IRF9,ITGA2,JARID2,JTB,KITLG,KLF4,LRIG1,MAP3K1,MAP9,MIR17HG,MXI1,NFYA,NUCKS1,PDCD1LG2,PER3,PHB2,PLK2,PRKAR2B,PTCH1,PTPRN2,PTX3,RHOB,S1PR1,SKA1,SPRY2,STAT1,TERF1,THRB,TLR2,TNF,VAV3,VEGFC,ZAK,ZNF365	66	18
Cellular Development, Cellular Growth and Proliferation, Hematological System Development and Function, Hematopoiesis, Tissue Development	development of blood cells	3.22e-08		0.738	ADCY7,ADORA2B,ARID4A,BCL2A1,C3,CCL2,CCL5,CD40,CD83,CDKN1A,CLEC4E,CSF2,CXCL1,CXCL11,CXCL5,CYLD,EGR1,ELF3,EPHB1,ETS1,FZD8,HMOX1,ICAM1,ID1,IL4I1,IL6,INHBA,KITLG,KLF4,LTB,MIR17HG,MMP14,NDFIP1,NFYA,NR2F6,PDCD1LG2,PHB2,PNP,PRKAA1,PTGS1,S1PR1,SOAT1,SOD2,STAT1,TAB2,TLR2,TNF,TNFAIP3,UBE2N,VAV3,WNT5A	51	14
Cell-To-Cell Signaling and Interaction, Cellular Movement, Hematological System Development and Function, Immune Cell Trafficking, Inflammatory Response	recruitment of macrophages	3.3e-08	Increased	3.784	CCL2,CD40,CLEC4E,CXCL8,ETS1,F3,ICAM1,MMP9,P2RY2,RHOB,S1PR1,TLR2,TNF,UCP2,VDR	15	5
Cardiovascular System Development and Function, Organ Development	function of heart	3.35e-08		-0.73	ADORA2B,ARG2,FBXO32,GAB1,GDF15,HBEGF,HMOX1,ICAM1,IL6,KITLG,MAP3K1,MMP1,MMP9,PLAT,PLAU,SLC6A6,THBD,TLR2,TNF,TNFAIP3,TRIM55,VAV3,VDR,XDH	24	5
Organismal Development	size of body	3.52e-08		1.217	ABHD5,AREG,ARID4A,BMPER,BRINP1,C3,CDKN1A,CYLD,DHRS3,ETS1,ETV5,F3,FAT4,FGFR2,GDF15,GPD2,GUCY1B3,HBEGF,HMOX1,HSD17B4,ID1,IGFBP3,IL6,ILF3,KCNJ16,LIN7C,MFSD2A,MMP14,MMP9,PAPPA,PEX13,PKDCC,PLA2G4A,PLAC8,PLAT,PLAU,PLCB4,PLK2,PRKAR2B,PTCH1,RCAN1,SCG5,SEMA3A,SERP1,SFRP4,SLC6A6,SOD2,SPRY2,STAT1,STC2,THRB,TNF,TNFAIP3,TSPAN2,VDR,WNT5A,XDH	57	12
Hematological System Development and Function, Immune Cell Trafficking, Inflammatory Response, Tissue Development	accumulation of macrophages	3.67e-08		1.991	ACKR3,AIMP1,CCL2,CCL5,CD40,FGF1,HMOX1,NT5E,PLAT,PLAU,PTX3,TNF,VEGFC	13	2
Cellular Development, Cellular Growth and Proliferation, Embryonic Development, Hematological System Development and Function, Hematopoiesis, Lymphoid Tissue Structure and Development, Organ Development, Organismal Development, Tissue Development	development of lymphocytes	3.68e-08		1.145	ADCY7,ADORA2B,BCL2A1,C3,CCL5,CD40,CD83,CDKN1A,CLEC4E,CSF2,CXCL1,CXCL5,CYLD,EGR1,ELF3,EPHB1,ETS1,FZD8,ICAM1,ID1,IL4I1,IL6,INHBA,KITLG,KLF4,LTB,MIR17HG,MMP14,NDFIP1,NR2F6,PDCD1LG2,PHB2,PNP,PRKAA1,PTGS1,S1PR1,STAT1,TAB2,TLR2,TNF,TNFAIP3,UBE2N,VAV3,WNT5A	44	13
Embryonic Development, Organ Development, Organismal Development	development of lymphatic system	3.8e-08	Increased	2.045	ADCY7,ADORA2B,ARID4A,BCL2A1,C3,CCL5,CD40,CD83,CDKN1A,CLEC4E,CSF2,CXCL1,CXCL5,CXCL8,CYLD,EGR1,ELF3,EPHB1,ETS1,FGF1,FZD8,ICAM1,ID1,IL4I1,IL6,INHBA,JARID2,KITLG,KLF4,LCP1,LTB,MIR17HG,MMP14,NDFIP1,NR2F6,NRP2,PDCD1LG2,PHB2,PNP,PRKAA1,PTGS1,S1PR1,SCG5,STAT1,TAB2,TLR2,TNF,TNFAIP3,UBE2N,VAV3,VEGFC,WNT5A	52	15
Cell Morphology, Tissue Development	tubulation of cells	3.92e-08		0.883	CXCL1,CXCL8,FGF5,ID1,IGFBP3,IL6,PLAU,PLAUR,RAP1A,RCAN1,RGS4,RHOB,S1PR1,SAA1,SEMA3A,SERPIND1,TAB2,VEGFC	18	7
Embryonic Development, Hair and Skin Development and Function, Organ Development, Organismal Development, Tissue Development	formation of skin	3.99e-08		0.705	ABHD5,ARRDC3,CDKN1A,COL17A1,CSF2,CYLD,ELF3,EMP1,FGFR2,GAB1,ID1,IL6,INHBA,ITGA2,KLF4,LAMB3,LAMC2,LRIG1,LTB,MAFF,PTCH1,PTGER2,PTGS1,RDH10,SFRP4,SNAP25,SOD2,TNF,TNFRSF19,VDR,VEGFC	31	9
Cellular Movement, Hematological System Development and Function, Immune Cell Trafficking, Inflammatory Response	chemotaxis of myeloid cells	4.31e-08	Increased	3.211	C3,CCL2,CCL20,CCL5,CDKN1A,CSF2,CXCL1,CXCL2,CXCL3,CXCL5,CXCL8,HAVCR1,ICAM1,INHBA,KITLG,LITAF,MMP7,PLAU,PLAUR,PPIA,RHOB,SAA1,SWAP70,TLR2,TNF,VAV3,VEGFC	27	8
Lipid Metabolism, Small Molecule Biochemistry	synthesis of leukotriene	4.35e-08		1.897	ALOX5AP,CCL5,CSF2,CXCL1,CXCL3,CXCL8,KITLG,PLA2G4A,PTGER2,SOAT1,TLR2,TNF	12	3
Protein Synthesis	quantity of protein in blood	4.61e-08		1.06	AMACR,ARHGDIB,C3,CERS6,CLEC4E,CSF2,CTSS,CYB5R4,EGLN3,F3,GALNT3,GPD2,GPR68,HMOX1,IGFBP3,IL6,IRAK2,KCNK3,KLRC1,LCLAT1,MAVS,MMP9,NLRP3,NT5E,PPIA,PRKAR2B,RPS6KA5,SCG5,SERP1,SLC19A2,SOAT1,SOD2,STAT1,THBD,THRB,TLR2,TNF,VAV3,VDR	39	8
Cancer, Organismal Injury and Abnormalities	metastasis of cells	4.86e-08		1.684	CCL2,CD82,CSF2,CXCL1,CXCL2,CXCL3,CXCL5,CXCL8,F3,HMOX1,INHBA,ITGA2,MMP1,MMP9,PLAU,PLAUR,RHOB,THRB,TLR2,TNF,UBE2N,VAV3,VEGFC,WNT5A,WSB1	25	10
Cellular Development, Connective Tissue Development and Function, Skeletal and Muscular System Development and Function, Tissue Development	differentiation of osteoclasts	5.06e-08		1.196	AREG,ATP6V0D2,C3,CA2,CCL2,CCL5,CSF2,CXCL8,GPR68,ID1,IL6,INHBA,KLF4,PTGER2,SEMA3A,SIGLEC15,STAT1,TLR2,TMEM64,TNF,WNT5A	21	7
Cellular Movement	invasion of carcinoma cell lines	5.47e-08		0.574	AREG,ARTN,CD82,COPB2,CSF2,DDX58,DOCK4,ELF3,ENAH,FGFR2,HAS2,HBEGF,ID1,IL6,ITGB6,LAMB3,MMP9,NRP2,PLAUR,VEGFC,WNT5A,WSB1	22	7
Cellular Development, Cellular Growth and Proliferation, Hematological System Development and Function	proliferation of mononuclear leukocytes	5.5e-08		-0.078	ARHGDIB,BCL2A1,C3,CCL2,CCL5,CD40,CD83,CDKN1A,CSF2,CXCL2,CYLD,EGR1,EPHB1,ETS1,HAVCR1,HMOX1,ICAM1,IL4I1,IL6,INHBA,ISG20,KITLG,KLF4,LAPTM5,LCP1,LY96,MAP3K1,MAVS,MIR17HG,MMP9,MXI1,NDFIP1,NT5E,PDCD1LG2,PELI1,PLAU,PNP,PPIA,RCAN1,RPS6KA5,S1PR1,STAT1,STK17B,SWAP70,TLR2,TNF,TNFAIP3,TRAF1,UBE2N,VAV3,VDR	51	14
Cellular Movement, Hematological System Development and Function, Immune Cell Trafficking, Inflammatory Response	chemotaxis of mononuclear leukocytes	5.64e-08	Increased	2.269	ACKR3,CCL2,CCL20,CCL5,CD40,CSF2,CXCL11,CXCL3,CXCL8,INHBA,LCP1,MMP9,PLAU,PLAUR,PPIA,S1PR1,SAA1,TLR2,TNF,WNT5A	20	4
Cellular Movement, Hair and Skin Development and Function	cell movement of keratinocytes	6.17e-08		1.673	COL17A1,CXCL1,CXCL11,CXCL8,HAS2,HBEGF,ICAM1,IL6,ITGA2,MMP1,MMP9,S1PR1,SERPINB2,TNF	14	6
Cell-To-Cell Signaling and Interaction, Hematological System Development and Function, Immune Cell Trafficking, Inflammatory Response	activation of antigen presenting cells	6.83e-08	Increased	2.72	ADORA2B,C3,CCL2,CCL5,CD40,CLEC4E,CSF2,CTSS,CXCL5,CXCL8,HAVCR1,HMOX1,ICAM1,IL6,INHBA,ITGB6,KLF4,LTB,MMP9,PELI1,PLAT,PTGER2,STARD7,STAT1,TLR2,TNF,UBE2N,WNT5A	28	7
Cell-To-Cell Signaling and Interaction, Cellular Movement	attraction of blood cells	7.07e-08	Increased	2.956	C3,CCL2,CCL20,CCL5,CSF2,CXCL1,CXCL11,CXCL3,CXCL5,CXCL8,KITLG,TNF	12	4
Cell-To-Cell Signaling and Interaction, Cellular Growth and Proliferation, Hematological System Development and Function	stimulation of lymphocytes	7.26e-08	Increased	2.113	C3,CD40,CD82,CD83,CLEC4E,CSF2,CXCL11,HMOX1,IL6,KITLG,KLRC1,PDCD1LG2,STEAP1,TNF,TNFAIP3,XDH	16	3
Cancer, Cell Death and Survival, Organismal Injury and Abnormalities, Tumor Morphology	apoptosis of tumor cells	7.39e-08	Decreased	-2.033	AIMP1,CD40,CDKN1A,CSF2,ETS1,GALNT3,GDF15,HBEGF,HIPK2,HMGA2,IGFBP3,IL6,MAP3K1,MMP9,PHLDA1,PLAU,PLAUR,PNP,PROCR,PTGER2,RHOB,SLC7A11,SPRY2,THRB,TNF,VEGFC	26	6
Cardiovascular Disease, Developmental Disorder, Organismal Injury and Abnormalities	hypertrophy of heart	8.27e-08	Decreased	-2.024	CA2,CDKN1A,ECE1,FBXO32,GDF15,HBEGF,HMOX1,IL6,INHBA,KLF4,MEF2D,MMP1,MMP7,MMP9,MTPN,NT5E,PLA2G4A,PLAT,PLAU,PPIA,RCAN1,RGS4,SEMA3A,SOD2,TNF,TNFAIP3,TRIM55,VAV3,VDR	29	7
Cell-To-Cell Signaling and Interaction	response of antigen presenting cells	8.49e-08	Increased	2.904	C3,CCL5,CD40,CSF2,CTSS,DDX58,HMOX1,IL6,LY96,PLAUR,PRKAA1,PTX3,SAA1,SIRPB1,SOAT1,SWAP70,TAP1,TLR2,TNF,UCP2,WNT5A	21	4
Cardiovascular Disease	peripheral vascular disease	8.6e-08		0.114	ALOX5AP,ARHGDIB,CCL5,CD83,CTSS,CXCL3,GPRC5A,IL6,KLF4,LAPTM5,LCP1,LPXN,LY96,MAP4K4,MMP9,NEFL,PDE4DIP,PLA2G4A,PLAT,PLAUR,PTGER2,PTGS1,SLC19A2,SLC6A6,SNAP25,SOAT1,SUCLA2,TNF,UCP2,UNG,VIMP,VWA5A,XDH	33	4
Cellular Movement, Hematological System Development and Function, Hypersensitivity Response, Immune Cell Trafficking, Inflammatory Response	chemotaxis of mast cells	8.84e-08		1.641	C3,CCL2,CCL5,CXCL8,KITLG,PLAU,SWAP70,VEGFC	8	4
Cellular Movement	migration of carcinoma cell lines	8.99e-08		1.479	AREG,CD82,CSF2,CXCL8,DDX58,EPHB1,ETS1,HMGA2,HMOX1,ID1,IL6,ITGB6,MMP1,MMP7,NRP2,PODXL,TLR2,TNF,VEGFC,WNT5A	20	9
Cellular Movement, Hematological System Development and Function, Hypersensitivity Response, Immune Cell Trafficking	migration of eosinophils	9.05e-08		1.762	C3,CCL5,CXCL11,CXCL2,CXCL8,IGFBP3,PLAUR,SWAP70,TNF	9	3
Hematological System Development and Function, Inflammatory Response, Tissue Morphology	quantity of macrophages	9.13e-08		0.685	CCL2,CD40,CSF2,CTSS,GDF15,GPR68,HAVCR1,HBEGF,IL6,ITGB6,LITAF,MMP9,NFYA,PLAT,PLAU,PTGER2,SOAT1,THBD,TNF,TNFAIP3,VDR	21	4
Free Radical Scavenging	metabolism of reactive oxygen species	9.13e-08	Increased	2.461	ARHGDIB,C3,CCL5,CD40,CDKN1A,CSF2,CXCL2,CXCL8,CYB5R4,ETS1,GSTA4,HAS2,HMOX1,HSPA9,ICAM1,IL4I1,IL6,LCLAT1,MMP1,MMP14,NCF2,PLA2G4A,PLAU,PLAUR,PPIA,PRDX3,PRKAA1,PTGS1,RAP1A,SOD2,SPRY2,STC1,TLR2,TNF,UCP2,VDR,WNT5A,XDH	38	9
Cell Death and Survival	apoptosis of epithelial cells	9.29e-08		-0.328	ALDH1A1,BCL2A1,CD40,CDKN1A,CTSS,CXCL8,EGR1,F3,GDF15,HIPK2,ID1,IL6,INHBA,NLRP3,PLA2G4A,PLAT,PLAU,PLAUR,PTGS1,S1PR1,SAA1,SEMA7A,SOD2,STAT1,TLR2,TNF	26	7
Cell-mediated Immune Response, Cellular Development, Cellular Function and Maintenance, Cellular Growth and Proliferation, Embryonic Development, Hematological System Development and Function, Hematopoiesis, Lymphoid Tissue Structure and Development, Organ Development, Organismal Development, Tissue Development	T cell development	9.36e-08		1.128	ADCY7,ADORA2B,BCL2A1,CCL5,CD40,CD83,CDKN1A,CLEC4E,CSF2,CXCL1,CXCL5,CYLD,EGR1,ELF3,ETS1,FZD8,ICAM1,ID1,IL4I1,IL6,INHBA,KITLG,KLF4,LTB,MIR17HG,NDFIP1,NR2F6,PDCD1LG2,PHB2,PNP,PRKAA1,PTGS1,S1PR1,STAT1,TLR2,TNF,TNFAIP3,UBE2N,VAV3,WNT5A	40	13
Digestive System Development and Function, Organ Morphology, Organismal Development	abnormal morphology of intestine	9.54e-08			AREG,C3,CCNG1,CDKN1A,CYLD,DDX58,FAT4,FGFR2,GUCY1B3,KLF4,LTB,MMP9,PKDCC,PLAU,PTGS1,RDH10,SPRY2,STAT1,TLR2,TNF,VDR,WNT5A	22	8
Lipid Metabolism, Small Molecule Biochemistry	synthesis of eicosanoid	9.54e-08		1.878	ALOX5AP,AREG,CCL5,CD40,CD83,CSF2,CXCL1,CXCL3,CXCL8,HMOX1,IL6,KITLG,MAP3K1,PLA2G4A,PTGER2,PTGIS,PTGS1,S1PR1,SEMA3A,SOAT1,TLR2,TNF	22	4
Cardiovascular System Development and Function	morphology of cardiovascular system	9.57e-08			ACKR3,ADAMTS9,ADD3,ARG2,ARID3B,ARID4A,BMPER,CCL2,CDKN1A,CLEC4E,DHRS3,DUSP6,ECE1,EGLN3,ETS1,F3,FAT4,FGF1,GAB1,GDF15,GPR180,HAS2,HBEGF,HMOX1,IL6,ITGA2,KITLG,MAP3K1,MMP14,MMP9,PAPPA,PLA2G4A,PLAU,PTGIS,RCAN1,RGS4,RHOB,SCG5,SEMA3A,SLC6A6,SNAP25,SOD2,THBD,TLR2,TNF,TRIM55,VAV3,VDR,VEZF1	49	9
Cellular Movement, Renal and Urological System Development and Function	cell movement of kidney cell lines	9.61e-08	Increased	2.555	C3,CCL20,CCL5,CXCL1,CXCL8,DOCK4,ETS1,GAB1,ICAM1,ITGA2,MMP14,MMP9,PLAU,PLAUR,PPIA,SAA1,TLR2	17	5
Cell Death and Survival	cell death of immune cells	9.78e-08		1.595	AIMP1,ANTXR2,BCL2A1,C3,CCL2,CCL5,CD40,CDKN1A,CSF2,CXCL1,CXCL2,CXCL8,CYLD,EGR1,ETS1,HMOX1,ICAM1,IFIH1,IL6,INHBA,KITLG,KLF4,LRIG1,MIR17HG,NCF2,NLRP3,PDCD1LG2,PLA2G4A,PLAT,PNP,PRKAA1,RCAN1,SERPINB2,SLC6A6,SOAT1,SOD2,STAT1,STK17B,SWAP70,TLR2,TNF,TNFAIP3,TRAF1,VAV3,VDR,WNT5A	46	15
Hematological System Development and Function, Lymphoid Tissue Structure and Development, Tissue Morphology	quantity of T lymphocytes	1.01e-07	Increased	2.319	ARHGDIB,ARID4A,BCL2A1,CCL5,CD40,CD83,CDKN1A,CSF2,CTSS,CYLD,DDX58,ENTPD7,ETS1,FGFR2,ICAM1,ID1,IL6,KITLG,KLF4,KLRC1,LTB,MAVS,MIR17HG,MMP9,NDFIP1,NLRP3,PDCD1LG2,PNP,PPIA,PTPN13,SAA1,SLC6A6,STARD7,STAT1,STK17B,TAP1,TLR2,TNF,VAV3,VDR	40	12
Cell-To-Cell Signaling and Interaction, Hematological System Development and Function, Inflammatory Response	binding of professional phagocytic cells	1.04e-07		1.093	C3,CCL2,CCL5,CD40,CD83,CSF2,CXCL1,CXCL2,CXCL8,FGF1,ICAM1,KITLG,RHOB,THBD,TNF	15	5
Cardiovascular System Development and Function, Organ Development, Organ Morphology, Skeletal and Muscular System Development and Function	contractility of cardiac muscle	1.05e-07		-1.311	FBXO32,GAB1,HBEGF,HMOX1,ICAM1,IL6,MAP3K1,MMP9,PLAT,PLAU,SLC6A6,TLR2,TNF,TRIM55,VAV3,VDR,XDH	17	2
Cellular Development, Cellular Growth and Proliferation, Hematological System Development and Function, Lymphoid Tissue Structure and Development	cell proliferation of T lymphocytes	1.08e-07		0.378	ARHGDIB,C3,CCL2,CCL5,CD40,CD83,CDKN1A,CSF2,CYLD,EGR1,EPHB1,ETS1,HAVCR1,HMOX1,ICAM1,IL4I1,IL6,INHBA,ISG20,KITLG,KLF4,LAPTM5,LCP1,MIR17HG,MMP9,MXI1,NDFIP1,NT5E,PDCD1LG2,PELI1,PLAU,PNP,RCAN1,RPS6KA5,STAT1,STK17B,TLR2,TNF,TNFAIP3,TRAF1,UBE2N,VAV3,VDR	43	12
Cell Death and Survival	apoptosis of tumor cell lines	1.09e-07		-0.239	ADORA2B,AIMP1,AREG,ARID3B,BCL2A1,CCNG1,CD40,CD82,CDKN1A,CDKN1C,CERS6,CSF2,CXCL8,CYLD,DDX58,DUT,EGR1,ETS1,FBXO32,FGF5,FGFR2,G0S2,GAB1,GDF15,GEM,HBEGF,HIPK2,HMOX1,HSPA9,ID1,IGFBP3,IL6,INHBA,IRAK2,ITGA2,KITLG,KLF4,MAP3K1,MAVS,MIR17HG,MMP14,MMP7,MMP9,MXI1,OAS3,PHB2,PLAT,PLAU,PLAUR,PLK2,PPIA,PRKAA1,PRKAR2B,PTPN13,RCAN1,RGS3,RHOB,SEMA3A,SFRP4,SOD2,SPRY2,SRI,STAT1,TERF1,TLR2,TNF,TNFAIP3,TPD52,TRAF1,VDR,…	73	21
Organismal Injury and Abnormalities	angiogenesis of lesion	1.09e-07		0.19	C3,CSF2,CTSS,F3,FGFR2,KITLG,MIR17HG,MMP1,MMP14,MMP9,PTGER2,SEMA6A,THBD,TNF,VAV3,VEGFC	16	6
Cellular Development, Hematopoiesis	maturation of antigen presenting cells	1.09e-07		1.444	CCL5,CD40,CD83,CSF2,EGR1,ELF3,HMOX1,ICAM1,IFIH1,IL6,INHBA,STAT1,SWAP70,TLR2,TNF,VEGFC	16	4
Infectious Diseases	infection by Reoviridae	1.09e-07			CCL2,CCL5,CTSS,CXCL1,CXCL8	5	3
Cell-To-Cell Signaling and Interaction, Inflammatory Response	immune response of antigen presenting cells	1.13e-07	Increased	2.785	C3,CD40,CSF2,CTSS,DDX58,HMOX1,IL6,LY96,PLAUR,PRKAA1,PTX3,SAA1,SIRPB1,SOAT1,SWAP70,TAP1,TLR2,TNF,UCP2,WNT5A	20	4
Cellular Development, Hematological System Development and Function, Hematopoiesis	differentiation of leukocytes	1.21e-07		1.151	ADORA2B,ARID4A,BCL2A1,CCL2,CCL5,CD40,CD83,CDKN1A,CLEC4E,CSF2,CXCL1,CXCL5,CXCL8,CYLD,DDX58,EGR1,ELF3,EMP1,ETS1,FZD8,GPR68,HMOX1,HSPA9,ICAM1,ID1,IL6,INHBA,KITLG,KLF4,LCP1,MIR17HG,MMP14,MMP9,NDFIP1,NFYA,PHB2,PLA2G4A,PNP,PRDX3,S1PR1,SEMA3A,STAT1,SWAP70,TLR2,TNF,TNFAIP3,VDR	47	15
Cell-To-Cell Signaling and Interaction	activation of epithelial cells	1.21e-07		1.387	AREG,CXCL2,CXCL8,CYLD,HBEGF,ICAM1,P2RY2,TNF	8	3
Cancer, Organismal Injury and Abnormalities	benign neoplasia	1.24e-07		0.57	ACKR3,ADTRP,AFF3,ALDH1A1,ANTXR2,ANXA8/ANXA8L1,C3,CA2,CDKN1A,COL13A1,COL17A1,CSF2,CYLD,DUT,EGR1,ELF3,EPHB1,FAM46C,FGFR2,HMGA2,HMOX1,ID1,IFI44L,IFIH1,IGFBP3,INHBA,ITIH5,KCNK6,KITLG,LAMB3,LRIG1,MAP3K1,MAVS,MMP1,MMP14,MMP7,MMP9,NAV3,NRP2,PDCD1LG2,PHLDA1,PISD,PLCB4,PTCH1,PTGER2,PTGIS,PTGS1,PTPN13,PTPRR,SEMA3C,SEMA5B,SERPINB2,SERPIND1,SETBP1,SOD2,STAT1,TBL1X,THRB,TLR2,TNFAIP3,TSPAN12,TWF1,UNG,VAV3,VDR	65	14
Cellular Movement	migration of tumor cells	1.25e-07	Increased	2.589	CCL2,CCL5,CD82,CSF2,CXCL1,CXCL11,CXCL8,F3,HBEGF,IL6,KLF4,MAP3K1,MMP14,MMP9,PLAU,PLAUR,RHOB,SERPINB2,SPRY2,THRB,VEGFC,WNT5A	22	9
Cellular Movement	chemotaxis of tumor cell lines	1.27e-07	Increased	2.558	C3,CCL2,CCL20,CCL5,CSF2,CXCL3,CXCL8,ITGA2,KITLG,P2RY2,PLAU,PLAUR,PPIA,RGS3,S1PR1,SEMA3A,TNF	17	4
Cell Death and Survival	apoptosis of phagocytes	1.31e-07		-0.787	BCL2A1,CCL2,CCL5,CD40,CDKN1A,CSF2,CXCL1,CXCL2,CXCL8,IL6,KITLG,NLRP3,PLA2G4A,PLAT,SOAT1,SOD2,STAT1,TLR2,TNF,TNFAIP3	20	9
Cancer, Organismal Injury and Abnormalities	tumorigenesis of tissue	1.31e-07	Increased	2.166	ABHD2,ABHD5,ACBD5,ACSM3,ADAMTS18,ADAMTS9,ADCY7,ADD3,ADORA2B,ADTRP,AFF3,AKR1B10,ALDH1A1,AMACR,ANLN,ANTXR2,ANXA8/ANXA8L1,AP1M2,APOL3,AREG,ARG2,ARHGAP22,ARHGAP26,ARHGAP28,ARHGDIB,ARID3B,ARID4A,ARL5B,ARRDC3,ASB9,ATP6V0D2,ATP8A1,B3GNT7,BBOF1,BCL2A1,BMPER,C12orf49,C1orf106,C1QTNF1,C21orf91,C3,C7orf73,CA13,CA2,CCDC15,CCDC183,CCDC85B,CCDC88C,CCL2,CCL20,CCNG1,CCRL2,CD82,CD83,CDA,CDH6,CDKN1A,CDKN1C,CEP68,C…	402	34
Cellular Movement, Hematological System Development and Function, Immune Cell Trafficking	influx of granulocytes	1.31e-07		1.734	CCL2,CXCL1,CXCL2,CXCL5,IL6,LY96,PLAT,PLAUR,PTX3,TLR2,TNF	11	4
Cellular Development, Cellular Growth and Proliferation, Embryonic Development, Lymphoid Tissue Structure and Development, Organ Development, Organismal Development, Tissue Development	development of lymphatic system cells	1.42e-07		1.468	ADCY7,ADORA2B,ARID4A,BCL2A1,C3,CCL5,CD40,CD83,CDKN1A,CLEC4E,CSF2,CXCL1,CXCL5,CYLD,EGR1,ELF3,EPHB1,ETS1,FZD8,ICAM1,ID1,IL4I1,IL6,INHBA,KITLG,KLF4,LTB,MIR17HG,MMP14,NDFIP1,NR2F6,PDCD1LG2,PHB2,PNP,PRKAA1,PTGS1,S1PR1,STAT1,TAB2,TLR2,TNF,TNFAIP3,UBE2N,VAV3,WNT5A	45	13
Lipid Metabolism, Small Molecule Biochemistry	metabolism of eicosanoid	1.5e-07		1.879	ALOX5AP,AREG,CCL5,CD40,CD83,CSF2,CXCL1,CXCL3,CXCL8,HMOX1,IL6,KITLG,MAP3K1,PLA2G4A,PTGER2,PTGIS,PTGR2,PTGS1,S1PR1,SEMA3A,SOAT1,TLR2,TNF	23	4
Gastrointestinal Disease, Inflammatory Disease	Inflammatory Bowel Disease	1.52e-07		-0.707	C1orf106,CCL2,CD40,CSF2,CXCL2,CXCL3,CXCL5,CXCL8,CYLD,FGFR2,ICAM1,IL6,ITGB6,MMP9,NLRP3,PROCR,PTGS1,S1PR1,THBD,TLR2,TMEM192,TNF,TNFAIP3,VDR	24	8
Neurological Disease	seizures	1.54e-07		-0.386	ARRDC3,C3,CA13,CA2,CD83,CDKN1A,DUSP6,EGR1,ELL2,HMOX1,IL4I1,IL6,INHBA,KCNK1,LAMB3,MIR22HG,MMP9,NRP2,PDE4DIP,PIGV,PLAT,PLAUR,PLK2,PPP1R9A,PTPRN2,RGS4,SCG5,SLC1A3,SOD2,SPRY2,SRGN,THRB	32	5
Nucleic Acid Metabolism, Small Molecule Biochemistry	synthesis of nucleotide	1.57e-07		-0.062	ADCY7,ADORA2B,ADSS,AK4,CCL2,DUT,ECE1,G0S2,GBAS,GUCY1B3,HMOX1,IL6,INHBA,MCU,ME1,MEF2D,NT5E,OAS1,P2RY2,PNP,PPIF,PRPS2,PTGER2,PTGIS,PTGS1,RPSA,SOAT1,SOD2,TNF,UCP2	30	2
Cellular Development, Embryonic Development, Hair and Skin Development and Function, Organ Development, Organismal Development, Tissue Development	differentiation of skin	1.59e-07		0.347	ABHD5,CDKN1A,CYLD,ELF3,FGFR2,GAB1,ID1,IL6,KLF4,LRIG1,MAFF,PTCH1,PTGS1,RDH10,SFRP4,SOD2,TNF,VDR,VEGFC	19	7
Lipid Metabolism, Small Molecule Biochemistry	synthesis of fatty acid	1.61e-07		1.655	ACSM3,ALOX5AP,AREG,CAV2,CCL5,CD40,CD83,CSF2,CXCL1,CXCL3,CXCL8,EGR1,ERLIN2,HMOX1,IL6,KITLG,MAP3K1,PLA2G4A,PTGER2,PTGIS,PTGS1,S1PR1,SEMA3A,SLC1A3,SOAT1,TLR2,TNF	27	5
Cellular Movement, Immune Cell Trafficking, Lymphoid Tissue Structure and Development	chemotaxis of lymphatic system cells	1.61e-07	Increased	2.27	ACKR3,CCL2,CCL20,CCL5,CD40,CXCL11,CXCL3,CXCL8,LCP1,MMP14,MMP9,PPIA,S1PR1,SAA1,VEGFC,WNT5A	16	5
Cardiovascular System Development and Function, Cell-To-Cell Signaling and Interaction	activation of vascular endothelial cells	1.64e-07		1.265	F3,HBEGF,ID1,PLAUR,PROCR,SERPIND1,TLR2,TNF	8	2
Cell-To-Cell Signaling and Interaction, Hematological System Development and Function, Immune Cell Trafficking, Inflammatory Response	activation of neutrophils	1.67e-07	Increased	2.657	C3,CCL2,CCL5,CSF2,CXCL1,CXCL3,CXCL8,HMOX1,IL6,SAA1,TLR2,TNF,VAV3	13	4
Cardiovascular System Development and Function, Tissue Morphology	permeability of vascular system	1.74e-07	Increased	3.109	C3,CXCL2,CXCL8,F3,ICAM1,ID1,MMP9,NT5E,PLAC8,PLAT,PLAU,PROCR,PTX3,S1PR1,SEMA7A,TNF,VEGFC,XDH	18	6
Cellular Movement, Hematological System Development and Function, Immune Cell Trafficking, Inflammatory Response	influx of phagocytes	1.83e-07	Increased	2.22	CCL2,CXCL1,CXCL2,CXCL5,IL6,P2RY2,PLAT,PLAUR,PTX3,TLR2,TNF	11	4
Nucleic Acid Metabolism	metabolism of nucleic acid component or derivative	1.89e-07		0.334	ADCY7,ADORA2B,ADSS,AK4,CCL2,CDA,CYB5R4,DUT,ECE1,ENTPD7,G0S2,GBAS,GPD2,GUCY1B3,HMOX1,IL6,INHBA,MCU,ME1,MEF2D,NT5E,OAS1,OAS3,P2RY2,PNP,PPIF,PRPS2,PTGER2,PTGIS,PTGS1,RPSA,SOAT1,SOD2,SUCLA2,TNF,UCP2,XDH,ZNRD1	38	2
Cancer, Cell Death and Survival, Organismal Injury and Abnormalities, Tumor Morphology	cell death of tumor cells	1.92e-07		-1.338	AIMP1,CD40,CDKN1A,COPB2,CSF2,CXCL11,CXCL8,EGLN3,ETS1,GALNT3,GDF15,HBEGF,HIPK2,HMGA2,HMOX1,HSPA9,IGFBP3,IL6,INHBA,KITLG,MAP3K1,MMP9,PHLDA1,PLAU,PLAUR,PNP,PROCR,PTGER2,RHOB,SLC7A11,SPRY2,STC1,THRB,TNF,VEGFC	35	8
Hematological System Development and Function, Inflammatory Response, Tissue Morphology	quantity of monocytes	1.97e-07		0.969	ARID4A,CD40,CDKN1A,CLEC4E,CSF2,CXCL8,GALNT3,GPR68,ICAM1,ID1,JARID2,KITLG,MMP9,SERPINB2,TNF	15	5
Cell Death and Survival	cell death of phagocytes	2.11e-07		-0.717	BCL2A1,CCL2,CCL5,CD40,CDKN1A,CSF2,CXCL1,CXCL2,CXCL8,HMOX1,IL6,KITLG,NLRP3,PLA2G4A,PLAT,SOAT1,SOD2,STAT1,TLR2,TNF,TNFAIP3	21	9
Cancer, Organismal Injury and Abnormalities	advanced malignant solid tumor	2.12e-07		1.465	ACKR3,ANXA8/ANXA8L1,CCL2,CCL5,CDH6,CSF2,CXCL8,DNAJB6,DUSP6,EMP1,ENAH,FGF1,FGFR2,GDF15,HMOX1,ICAM1,IL6,KCNK6,KLF4,LAMB3,LRIG1,LTB,MMP1,MMP14,MMP7,MMP9,NT5E,PAPPA,PLAT,PLAU,PLAUR,PPIA,PTGS1,PTX3,RGS4,SEMA3C,SLC7A11,STAT1,THBD,THRB,TLR2,VAV3,VEGFC,WNT5A	44	12
Organismal Injury and Abnormalities	calcinosis	2.15e-07		-1	ACKR3,CA2,GALNT3,MMP9,NT5E,PTGS1,SCG5,SFRP4,SOD2,VDR,XPR1	11	1
Cellular Development, Cellular Growth and Proliferation, Hematological System Development and Function, Hematopoiesis	proliferation of hematopoietic cells	2.17e-07		-0.983	CCL2,CCL20,CD40,CDKN1A,CDKN1C,CSF2,CXCL2,CXCL3,CXCL8,EGR1,GDF15,HIPK2,HSPA9,IL6,INHBA,KITLG,KLF4,RCAN1,S1PR1,SETBP1,STAT1,TNF,TNFAIP3,UBE2N	24	11
Cellular Development, Cellular Growth and Proliferation, Hematological System Development and Function, Lymphoid Tissue Structure and Development	proliferation of lymphocytes	2.24e-07		0.043	ARHGDIB,BCL2A1,C3,CCL2,CCL5,CD40,CD83,CDKN1A,CSF2,CYLD,EGR1,EPHB1,ETS1,HAVCR1,HMOX1,ICAM1,IL4I1,IL6,INHBA,ISG20,KITLG,KLF4,LAPTM5,LCP1,LY96,MAP3K1,MAVS,MIR17HG,MMP9,MXI1,NDFIP1,NT5E,PDCD1LG2,PELI1,PLAU,PNP,RCAN1,RPS6KA5,S1PR1,STAT1,STK17B,SWAP70,TLR2,TNF,TNFAIP3,TRAF1,UBE2N,VAV3,VDR	49	13
Cell-To-Cell Signaling and Interaction, Cellular Movement, Immune Cell Trafficking	attraction of phagocytes	2.29e-07	Increased	3.058	C3,CCL2,CCL20,CCL5,CXCL1,CXCL11,CXCL3,CXCL5,CXCL8,TNF	10	3
Cardiovascular Disease, Gastrointestinal Disease, Hematological Disease, Hepatic System Disease	Budd-Chiari syndrome	2.33e-07			F3,IL6,MMP7,PLAT,PLAU,THBD,VEGFC	7	4
Cell-To-Cell Signaling and Interaction, Hematological System Development and Function, Inflammatory Response	aggregation of blood platelets	2.34e-07		-0.143	ADAMTS18,ADORA2B,C1QTNF1,C3,CCL5,CD40,EPHB1,F3,GDF15,GUCY1B3,ITGA2,MMP1,PLA2G4A,PLAT,PTGER2,SEMA3A,SLC7A11,TLR2,VAV3,VDR	20	3
Cardiovascular System Development and Function, Cellular Development, Cellular Function and Maintenance, Cellular Growth and Proliferation, Organismal Development, Tissue Development	cell proliferation of vascular endothelial cells	2.35e-07		1.324	C3,CDKN1A,CXCL1,CXCL8,FGF1,FGF5,HIPK2,IL6,MMP1,NRP2,PLA2G4A,PPIA,RCAN1,SAA1,SEMA3A,SEMA6A,TNF	17	5
Cell Cycle	G0/G1 phase transition of tumor cell lines	2.35e-07			CDKN1A,IL6,KITLG,MMP9,PLAU,PLAUR,STAT1,THRB,TNF	9	5
Cancer, Organismal Injury and Abnormalities, Reproductive System Disease	neoplasia of breast cancer cell lines	2.42e-07		1.042	ARRDC3,ARTN,CCL2,CD82,CXCL1,CXCL2,CXCL3,ILF3,INHBA,ITGA2,PLAUR,TLR2,TNF,UBE2N,VAV3	15	4
Cellular Movement	invasion of breast cancer cell lines	2.43e-07		1.334	ARRDC3,CD82,CDKN1A,CTSS,CXCL5,DNAJB6,DUSP6,ENAH,ETS1,FGFR2,HAS2,ID1,ILF3,MMP1,MMP14,MMP9,PLAU,PLAUR,PODXL,PRKAA1,PTGER2,RAP1A,SP100,TNF	24	10
Cellular Development, Cellular Growth and Proliferation, Hematological System Development and Function, Hematopoiesis	proliferation of hematopoietic progenitor cells	2.6e-07		-1.187	CCL2,CCL20,CD40,CDKN1A,CSF2,CXCL2,CXCL3,CXCL8,EGR1,GDF15,HIPK2,HSPA9,IL6,INHBA,KITLG,KLF4,RCAN1,S1PR1,SETBP1,STAT1,TNF,TNFAIP3,UBE2N	23	10
Cancer, Organismal Injury and Abnormalities	metastasis of tumor cell lines	2.69e-07		1.976	CCL2,CD82,CXCL1,CXCL2,CXCL3,CXCL5,CXCL8,F3,HMOX1,INHBA,ITGA2,MMP1,MMP9,PLAUR,TLR2,TNF,UBE2N,VAV3,VEGFC,WSB1	20	9
Dermatological Diseases and Conditions, Inflammatory Disease	Acne	2.75e-07			AKR1B10,CXCL2,CXCL8,ICAM1,MMP1,MMP9,PLAUR,PTGS1,SAA2,SOD2,TLR2,TNF,VDR	13	4
Cellular Movement, Hematological System Development and Function, Immune Cell Trafficking	cell movement of leukocyte cell lines	2.75e-07		1.547	C3,CCL2,CCL5,CSF2,CXCL3,CXCL8,ICAM1,KITLG,PLAU,RGS3,S1PR1,TNF,WNT5A	13	4
Tissue Development	morphogenesis of epithelial tissue	2.78e-07		1.478	CA2,CXCL2,CXCL8,FGFR2,GAB1,HOXA13,ID1,MAP3K1,MMP14,MMP9,RCAN1,RHOB,SPRY2,STC1,TNF,VEGFC,WNT5A	17	7
Cellular Movement	cell movement of germ cell tumor cell lines	2.86e-07	Increased	2.219	CCL2,CCL5,CXCL3,CXCL8,EPHB1	5	2
Gastrointestinal Disease, Hepatic System Disease, Organismal Injury and Abnormalities	damage of liver	2.89e-07		0.315	AREG,C3,CCL2,CCL5,CD40,CDKN1A,CXCL1,CXCL8,EGR1,HMOX1,IL6,INHBA,LTB,MMP9,NLRP3,NT5E,PLAU,SAA1,SAA2,STAT1,TLR2,TNF,TNFAIP3,TRAF1	24	9
Organismal Functions, Organismal Injury and Abnormalities	healing of lesion	2.92e-07			AIMP1,C3,CSF2,EGR1,ELK3,FGF1,FGFR2,HBEGF,ICAM1,IL6,LAMC2,MAP3K1,MMP7,MMP9,PLAT,PLAU,PTGS1,SERPINB2,WNT5A	19	6
Cellular Movement, Hematological System Development and Function, Immune Cell Trafficking	cell movement of peripheral blood leukocytes	2.95e-07		1.279	ACKR3,CCL2,CCL20,CCL5,CXCL8,ICAM1,LCP1,PLAUR,PPIA,TLR2,TNF	11	2
Cancer, Organismal Injury and Abnormalities, Reproductive System Disease	breast or ovarian cancer	3.01e-07		-0.412	ADAMTS18,ADAMTS9,AFF3,ALDH1A1,ANLN,ANTXR2,ANXA8/ANXA8L1,AREG,ARG2,ARHGDIB,ARID3B,ATP8A1,C3,CCL2,CCNG1,CDKN1A,CNOT6,CORO2B,CSF2,CTDSPL,CXCL1,CXCL11,CXCL2,CXCL3,CXCL8,CYLD,DNAJB6,DNER,DNMBP,DOCK4,EGR1,ELF3,ELK3,ENAH,ENTPD7,ERLIN2,ETS1,F3,FAM107B,FAT4,FGF1,FGF5,FGFR2,FHDC1,GDF15,GJB2,GLCCI1,GLYR1,HAS2,HAVCR1,HBEGF,HMGA2,HMOX1,HNRNPA3,HOOK3,IFIH1,IGFBP3,IL6,ILF3,INHBA,IRF9,ISM1,ITGB6,ITIH5,JARID2,KCN…	142	24
Lipid Metabolism, Small Molecule Biochemistry	conversion of lipid	3.03e-07		-1.323	ABHD5,ALOX5AP,AMACR,CD40,FGFR2,HMOX1,HSD17B4,IL6,LCLAT1,MAP4K4,PRDX3,PTGER2,PTGIS,PTGS1,RDH10,SOD2,TNF	17	2
Infectious Diseases	dengue shock syndrome	3.08e-07			CXCL8,F3,IL6,PLAT,THBD,TNF	6	3
Respiratory Disease	chronic obstructive pulmonary disease	3.29e-07			ADORA2B,CA13,CA2,CCL5,CTSS,CXCL11,CXCL3,CXCL8,HMOX1,IL6,ITGB6,KCNK3,MMP1,MMP9,SFRP4,SLC7A11,TNF,VDR	18	4
Cardiovascular System Development and Function, Cellular Movement	movement of vascular endothelial cells	3.38e-07		1.592	ACKR3,CXCL1,CXCL8,CYLD,FGF5,GAB1,ID1,MMP14,MMP9,PLA2G4A,RCAN1,S1PR1,SAA1,SP100,TAB2,THBD,TNF,VAV3,VEGFC	19	7
Cellular Movement, Hair and Skin Development and Function	migration of keratinocytes	3.48e-07		1.803	COL17A1,CXCL1,CXCL8,HAS2,HBEGF,ICAM1,IL6,ITGA2,MMP1,MMP9,SERPINB2,TNF	12	6
Cellular Development, Cellular Growth and Proliferation	cell proliferation of breast cancer cell lines	3.52e-07		0.95	ACKR3,ARRDC3,ARTN,CDKN1A,CSF2,DNAJB6,ELF3,ENAH,ETS1,F3,FGF1,FGFR2,GDF15,HAS2,HBEGF,ID1,IGFBP3,IL6,ILF3,INHBA,ITGA2,KITLG,KLF4,LRIG1,MMP14,OAS3,PLAU,PLAUR,PTGER2,SOD2,TNF,USP36,VDR,WNT5A	34	11
Cardiovascular System Development and Function, Cellular Movement	migration of vascular endothelial cells	3.56e-07		1.278	ACKR3,CXCL1,CYLD,FGF5,GAB1,ID1,MMP14,MMP9,PLA2G4A,RCAN1,S1PR1,SAA1,SP100,TAB2,THBD,TNF,VAV3,VEGFC	18	6
Cellular Growth and Proliferation, Connective Tissue Development and Function, Tissue Development	proliferation of synovial cells	3.64e-07	Increased	2.183	AREG,CCL2,CDKN1A,CSF2,IL6,PLAU,PLAUR,SAA1,TNF	9	3
Organismal Development	abnormal morphology of thoracic cavity	3.65e-07			ACKR3,ADAMTS9,ARHGDIB,ARID3B,CAV2,CDKN1A,CLEC4E,CSF2,CYLD,DHRS3,ECE1,ELK3,ETS1,F3,FAT4,FGFR2,HAS2,HBEGF,HMOX1,ID1,IL6,ITGB6,LTB,MAP3K1,MMP14,MMP9,PLA2G4A,PTGIS,RCAN1,RDH10,SCG5,SEMA3A,SLC6A6,SOD2,THBD,TLR2,TNF,TRIM55,UNG,VAV3,WNT5A	41	9
Cancer, Organismal Injury and Abnormalities	neoplasia of epithelial tissue	3.73e-07		1.984	ABHD2,ABHD5,ACSM3,ADAMTS18,ADAMTS9,ADCY7,ADD3,ADORA2B,ADTRP,AFF3,AKR1B10,ALDH1A1,AMACR,ANLN,ANTXR2,ANXA8/ANXA8L1,AP1M2,APOL3,AREG,ARG2,ARHGAP22,ARHGAP26,ARHGAP28,ARHGDIB,ARID3B,ARID4A,ARL5B,ARRDC3,ASB9,ATP6V0D2,ATP8A1,B3GNT7,BBOF1,BMPER,C12orf49,C1orf106,C1QTNF1,C21orf91,C3,C7orf73,CA13,CA2,CCDC15,CCDC183,CCDC85B,CCDC88C,CCL2,CCL20,CCNG1,CCRL2,CD82,CD83,CDA,CDH6,CDKN1A,CDKN1C,CEP68,CFI,CGNL1,CHPT…	396	34
Cell-To-Cell Signaling and Interaction, Cellular Growth and Proliferation, Hematological System Development and Function	stimulation of granulocytes	3.8e-07	Increased	2.557	CCL5,CSF2,CXCL3,CXCL5,CXCL8,IL6,TLR2,TNF	8	2
Cell-To-Cell Signaling and Interaction	binding of blood cells	3.81e-07		1.564	C3,CCL2,CCL20,CCL5,CD40,CD83,CSF2,CXCL1,CXCL11,CXCL2,CXCL8,FGF1,ICAM1,ITGA2,KITLG,NT5E,RHOB,SEMA3A,THBD,TLR2,TNF	21	6
Cancer, Organismal Injury and Abnormalities	cancer	3.88e-07	Increased	2.33	ABHD2,ABHD5,ACBD5,ACKR3,ACSM3,ADAMTS18,ADAMTS9,ADCY7,ADD3,ADORA2B,ADTRP,AFF3,AIMP1,AKR1B10,ALDH1A1,ALOX5AP,AMACR,ANLN,ANTXR2,ANXA8/ANXA8L1,AP1M2,APOL3,AREG,ARG2,ARHGAP22,ARHGAP26,ARHGAP28,ARHGDIB,ARID3B,ARID4A,ARL5B,ARRDC3,ASB9,ATP6V0D2,ATP8A1,B3GNT7,BBOF1,BCL2A1,BMPER,C12orf49,C1orf106,C1QTNF1,C21orf91,C3,C7orf73,CA13,CA2,CCDC15,CCDC183,CCDC85B,CCDC88C,CCL2,CCL20,CCL5,CCNG1,CCRL2,CD40,CD82,CD83,…	419	36
Gastrointestinal Disease, Immunological Disease, Ophthalmic Disease, Organismal Injury and Abnormalities	Sjogren's syndrome	3.92e-07			C3,CCL20,CCL5,CD40,CSF2,CXCL3,ETV5,F3,IFIH1,KITLG,MAP3K1,MMP9,STAT1,TLR2	14	4
Cell-mediated Immune Response, Cellular Movement, Hematological System Development and Function, Immune Cell Trafficking	T cell migration	3.93e-07	Increased	2.384	ACKR3,C3,CCL2,CCL20,CCL5,CD40,CTSS,CXCL1,CXCL11,CXCL8,ICAM1,IL6,LCP1,LTB,NLRP3,PDCD1LG2,PLAU,S1PR1,SAA1,SEMA3A,STAT1,TNF,WNT5A	23	6
Cellular Development, Hematopoiesis	maturation of dendritic cells	3.95e-07		1.31	CCL5,CD40,CD83,CSF2,EGR1,ELF3,HMOX1,ICAM1,IFIH1,IL6,INHBA,STAT1,SWAP70,TLR2,TNF	15	3
Respiratory System Development and Function	abnormal morphology of respiratory system	3.97e-07			ALDH1A1,BMPER,CAV2,CDKN1A,CSF2,CYLD,EGLN3,ELK3,FAT4,FGFR2,HBEGF,ID1,ILF3,ITGB6,LTB,MMP14,MMP9,PLAU,RDH10,SNAP25,SPRY2,TLR2,TNF,TRIM55,VDR,WNT5A	26	6
Cell-To-Cell Signaling and Interaction, Hematological System Development and Function, Inflammatory Response	immune response of neutrophils	3.97e-07	Increased	3.084	C3,CSF2,CXCL1,CXCL3,CXCL8,F3,ICAM1,PLAU,PLAUR,PTX3,SAA1,TNF	12	3
Infectious Diseases	replication of Herpesviridae	4e-07	Decreased	-2.351	CXCL3,DDX58,EGR1,IFIH1,IRF9,ISG20,OAS1,SP100,SPRY2,STAT1,TNF	11	4
Cardiovascular System Development and Function, Embryonic Development, Organ Development, Organismal Development, Tissue Development	cardiogenesis	4.24e-07		-0.57	ACKR3,ARID3B,CCL5,CXCL3,DHRS3,DNAJB6,DUSP6,ECE1,FAT4,FGF1,FGFR2,FILIP1L,GAB1,GDF15,HAS2,HBEGF,HMOX1,HOXA13,ID1,IL6,KITLG,MAP3K1,MIR17HG,MMP9,NRP2,PCSK5,PTCH1,RDH10,RGS4,S1PR1,SCG5,SEMA3C,SOD2,TAB2,THBD,TNF,WNT5A	37	7
Cancer, Organismal Injury and Abnormalities	tumorigenesis of malignant tumor	4.27e-07		1.703	CD40,CDKN1A,CSF2,CYLD,EGR1,GDF15,GPR68,IGFBP3,IL6,JARID2,LTB,MIR17HG,MMP1,MMP14,MMP9,MXI1,PLAU,PLAUR,PTCH1,SERPINB2,SLC6A6,THRB,TNF,WNT5A	24	8
Tissue Development	tubulation of epithelial tissue	4.35e-07		1.179	CXCL1,CXCL8,FGF5,ID1,IGFBP3,IL6,PLAU,PLAUR,RCAN1,RGS4,RHOB,SAA1,SERPIND1,TAB2,VEGFC	15	6
Dermatological Diseases and Conditions	chronic psoriasis	4.42e-07			CCL2,COPB2,CXCL1,ELL2,GJB2,HMOX1,ID1,ME1,PPIF,SERPINB8,SOD2,STAT1,THBD,TWF1,UBE2N,VDR	16	4
Cellular Movement, Hematological System Development and Function, Immune Cell Trafficking	migration of leukocyte cell lines	4.49e-07		1.845	C3,CCL2,CCL5,CXCL3,CXCL8,ICAM1,KITLG,S1PR1,WNT5A	9	4
Nucleic Acid Metabolism, Small Molecule Biochemistry	metabolism of nucleotide	4.67e-07		0.02	ADCY7,ADORA2B,ADSS,AK4,CCL2,CYB5R4,DUT,ECE1,ENTPD7,G0S2,GBAS,GPD2,GUCY1B3,HMOX1,IL6,INHBA,MCU,ME1,MEF2D,NT5E,OAS1,P2RY2,PNP,PPIF,PRPS2,PTGER2,PTGIS,PTGS1,RPSA,SOAT1,SOD2,TNF,UCP2	33	2
Cellular Movement, Hematological System Development and Function, Immune Cell Trafficking, Inflammatory Response	influx of neutrophils	4.68e-07	Increased	2.013	CCL2,CXCL1,CXCL2,CXCL5,IL6,PLAT,PLAUR,PTX3,TLR2,TNF	10	4
Digestive System Development and Function	morphology of digestive system	4.69e-07			AMACR,AREG,ARID4A,C3,CCNG1,CDKN1A,CSF2,CYB5R4,CYLD,DDX58,ECE1,EGLN3,EGR1,FAT4,FGFR2,GUCY1B3,IGFBP3,IL6,INHBA,KLF4,LAMC2,LTB,MFSD2A,MMP14,MMP9,NLRP3,PDZK1,PKDCC,PLAU,PTGS1,RDH10,RPSA,SCG5,SFRP4,SLC39A13,SOAT1,SOD2,SPRY2,STAT1,TAB2,THRB,TLR2,TNF,TRIM55,VDR,WNT5A	46	11
Cell-To-Cell Signaling and Interaction, Cellular Movement, Hematological System Development and Function, Immune Cell Trafficking	attraction of neutrophils	4.73e-07	Increased	2.548	CCL2,CCL5,CXCL1,CXCL3,CXCL5,CXCL8,TNF	7	3
Cellular Movement, Hematological System Development and Function, Immune Cell Trafficking, Inflammatory Response	chemotaxis of PBMCs	4.73e-07		1.18	CCL2,CCL20,CCL5,PLAUR,PPIA,TLR2,TNF	7	1
Molecular Transport	secretion of molecule	4.74e-07	Increased	2.148	ABHD5,ADORA2B,CA2,CCL5,CD40,CLEC4E,CSF2,CXCL8,EGR1,ELL2,FGF1,GAB1,GUCY1B3,HMOX1,IL6,INHBA,LIN7C,MAFF,P2RY2,PLA2G4A,PNP,PPIA,PRKAA1,PTGS1,PTPRN2,SAA1,SCG5,SEC24A,SNAP25,SOAT1,SOD2,STAT1,STC1,TLR2,TNF,TPD52,VDR,VEGFC,XDH	39	6
Cancer, Organismal Injury and Abnormalities	epithelial cancer	4.76e-07		1.843	ABHD2,ABHD5,ACSM3,ADAMTS18,ADAMTS9,ADCY7,ADD3,ADORA2B,ADTRP,AFF3,AKR1B10,ALDH1A1,AMACR,ANLN,ANTXR2,ANXA8/ANXA8L1,AP1M2,APOL3,AREG,ARG2,ARHGAP22,ARHGAP26,ARHGAP28,ARID3B,ARID4A,ARL5B,ARRDC3,ASB9,ATP6V0D2,ATP8A1,B3GNT7,BBOF1,BMPER,C12orf49,C1orf106,C1QTNF1,C21orf91,C3,C7orf73,CA13,CA2,CCDC15,CCDC183,CCDC85B,CCDC88C,CCL2,CCL20,CCNG1,CCRL2,CD82,CD83,CDA,CDH6,CDKN1A,CDKN1C,CEP68,CFI,CGNL1,CHPT1,CHST1,…	394	34
Cellular Movement	cell movement of brain cancer cell lines	4.82e-07		1.021	ACKR3,EGR1,FGF5,LRIG1,MMP14,MMP9,NREP,P2RY2,PLAT,PLAU,PLAUR,PPIF,SEMA3A,SOD2,VAV3,VEGFC	16	3
Cellular Movement, Hematological System Development and Function, Immune Cell Trafficking	migration of antigen presenting cells	4.82e-07		1.796	C3,CCL2,CCL20,CCL5,CD40,CSF2,CXCL1,CXCL11,CXCL8,ICAM1,NRP2,PLAU,RHOB,S1PR1,SWAP70,TLR2,TNF,WNT5A	18	4
Immunological Disease	abnormal quantity of cytokine	4.82e-07			C3,EGR1,ICAM1,IFIH1,IRAK2,MMP9,PLA2G4A,PLAT,PLAU,PLAUR,RPS6KA5,TLR2,TNF,VDR	14	4
Cardiovascular Disease, Organismal Injury and Abnormalities	formation of vascular lesion	4.82e-07		0.168	CCL2,CD40,CXCL2,CYLD,HAS2,HMOX1,IL6,MMP9,PCSK5,SERPIND1,SOAT1,THBD,TLR2,VDR	14	5
Cellular Movement, Immune Cell Trafficking	cellular infiltration by lymphoid cells	4.96e-07		1.509	C3,CCL2,CD40,CXCL8,GJB2,HMOX1,IL6,LTB,MAVS,MIR17HG,MMP14,NLRP3,SAA1,STAT1,TNF,UCP2,VAV3	17	5
Cell-To-Cell Signaling and Interaction, Cellular Growth and Proliferation, Hematological System Development and Function	induction of leukocytes	5.15e-07	Increased	2.304	CD40,CD83,CLEC4E,CSF2,CXCL8,IL6,KITLG,KLRC1,STEAP1,TNF,TNFAIP3,WNT5A	12	5
Cellular Development, Hematopoiesis	maturation of phagocytes	5.26e-07		1.188	CCL5,CD40,CD83,CSF2,EGR1,ELF3,HMOX1,ICAM1,IFIH1,IL6,INHBA,KITLG,STAT1,SWAP70,TLR2,TNF	16	4
Cell Cycle	mitosis	5.3e-07		-0.683	ADORA2B,ANLN,AREG,BRINP1,CD40,CDKN1A,CSF2,CYLD,EGR1,FGF1,FGFR2,GEM,HBEGF,HOXA13,IGFBP3,IL6,INHBA,JARID2,JTB,KITLG,MAP9,PHB2,PLK2,PTCH1,PTPRN2,PTX3,S1PR1,SKA1,SPRY2,STAT1,TERF1,THRB,TNF,VAV3,VEGFC,ZNF365	36	10
Cell-To-Cell Signaling and Interaction, Cellular Movement, Immune Cell Trafficking	attraction of leukocytes	5.37e-07	Increased	3.207	C3,CCL2,CCL20,CCL5,CSF2,CXCL1,CXCL11,CXCL3,CXCL5,CXCL8,TNF	11	3
Infectious Diseases	Viral Infection	5.46e-07	Decreased	-2.297	AIMP1,AREG,ARHGDIB,ARRDC3,ARTN,C3,C6orf1,CA2,CAV2,CCL2,CCL20,CCL5,CD40,CEP68,CFI,CHST1,CLEC4E,COPB2,CSF2,CTSS,CTSW,CXCL1,CXCL11,CXCL3,CXCL5,CXCL8,DDX58,EGR1,F3,FBXO21,FGFR2,G3BP2,GAB1,GBAS,GLYR1,GPD2,HAVCR1,HMOX1,HSPA9,ICAM1,IFIH1,IL6,ILF3,IMPA2,IRF9,ISG20,KCNK3,KLRC1,LAPTM5,LIN7C,LRIF1,MAP3K7CL,MAP4K4,MAVS,MMP9,NDFIP1,OAS1,P2RY2,PCSK5,PELI1,PER3,PLAT,PLAU,PLAUR,PPIA,PRKAA1,PTGS1,PTPRN2,PTX3,RAB1…	86	13
Cellular Growth and Proliferation, Tissue Development	proliferation of epithelial cells	5.49e-07		1.185	AREG,BCL2A1,C3,CCL5,CDKN1A,CDKN1C,CSF2,CXCL3,CXCL8,FGF1,FGFR2,GDF15,HAS2,HBEGF,ID1,IL6,INHBA,KITLG,KLF4,LRIG1,LTB,MIR17HG,MMP14,MMP7,MMP9,PTCH1,PTGER2,RGS4,SLC7A11,THRB,TLR2,TNF,VAV3,VDR,VEGFC,WNT5A	36	12
Cellular Movement, Hematological System Development and Function, Hypersensitivity Response, Immune Cell Trafficking, Inflammatory Response	cell movement of mast cells	5.55e-07	Increased	2.038	C3,CCL2,CCL5,CXCL8,ICAM1,KITLG,PLAU,PPIA,SWAP70,VEGFC	10	4
Cellular Movement, Hematological System Development and Function, Immune Cell Trafficking, Inflammatory Response	transmigration of phagocytes	5.84e-07		1.527	CCL2,CCL5,CSF2,CTSS,CXCL3,CXCL5,CXCL8,ICAM1,MMP14,MMP9,TNF,VAV3	12	3
Cancer, Organismal Injury and Abnormalities, Reproductive System Disease	tumorigenesis of genital organ	5.9e-07		1.062	ACSM3,ADAMTS18,ADAMTS9,ADD3,ADORA2B,AFF3,ALDH1A1,AMACR,ANLN,ANTXR2,ANXA8/ANXA8L1,APOL3,ARG2,ARHGDIB,ARID3B,ARID4A,ARL5B,ARRDC3,ATP8A1,BMPER,C1orf106,C3,CA2,CCDC15,CCL2,CCL5,CD82,CD83,CDA,CDKN1A,CEP68,CFI,CNOT6,COL13A1,COL17A1,CORO2B,CSF2,CSGALNACT2,CTDSPL,CTDSPL2,CTSS,CXCL1,CXCL11,CXCL8,DDX58,DNAJB6,DNER,DOCK4,DUT,EGR1,ELF3,ELL2,ENTPD7,EPHB1,ERLIN2,ETV5,F3,FAM127C,FAM13A,FAT4,FGF1,FGF5,FGFR2,FHDC…	203	23
Cancer, Organismal Injury and Abnormalities, Reproductive System Disease	genital tumor	6.11e-07		1.062	ACSM3,ADAMTS18,ADAMTS9,ADD3,ADORA2B,AFF3,ALDH1A1,AMACR,ANLN,ANTXR2,ANXA8/ANXA8L1,APOL3,ARG2,ARHGDIB,ARID3B,ARID4A,ARL5B,ARRDC3,ATP8A1,BMPER,C1orf106,C3,CA2,CCDC15,CCL2,CCL5,CD82,CD83,CDA,CDKN1A,CEP68,CFI,CNOT6,COL13A1,COL17A1,CORO2B,CSF2,CSGALNACT2,CTDSPL,CTDSPL2,CTSS,CXCL1,CXCL11,CXCL8,DDX58,DNAJB6,DNER,DOCK4,DUT,EGR1,ELF3,ELL2,ENTPD7,EPHB1,ERLIN2,ETV5,F3,FAM127C,FAM13A,FAT4,FGF1,FGF5,FGFR2,FHDC…	203	23
Cancer, Organismal Injury and Abnormalities	malignant solid tumor	6.15e-07	Increased	3.144	ABHD2,ABHD5,ACBD5,ACKR3,ACSM3,ADAMTS18,ADAMTS9,ADCY7,ADD3,ADORA2B,ADTRP,AFF3,AIMP1,AKR1B10,ALDH1A1,ALOX5AP,AMACR,ANLN,ANTXR2,ANXA8/ANXA8L1,AP1M2,APOL3,AREG,ARG2,ARHGAP22,ARHGAP26,ARHGAP28,ARHGDIB,ARID3B,ARID4A,ARL5B,ARRDC3,ASB9,ATP6V0D2,ATP8A1,B3GNT7,BBOF1,BMPER,C12orf49,C1orf106,C1QTNF1,C21orf91,C3,C7orf73,CA13,CA2,CCDC15,CCDC183,CCDC85B,CCDC88C,CCL2,CCL20,CCL5,CCNG1,CCRL2,CD40,CD82,CD83,CDA,CDH…	414	36
Cancer, Cell Cycle, Organismal Injury and Abnormalities	interphase of tumor cells	6.3e-07			CDKN1A,CYLD,EGR1,FGF1,IGFBP3,IL6,INHBA,TNF	8	5
Cellular Movement	intravasation of cells	6.33e-07		1.342	MMP1,MMP9,PLAU,PLAUR,VAV3	5	2
Cancer, Organismal Injury and Abnormalities	abdominal neoplasm	6.35e-07		0.276	ABHD2,ABHD5,ACKR3,ACSM3,ADAMTS18,ADAMTS9,ADCY7,ADD3,ADORA2B,ADTRP,AFF3,AIMP1,AKR1B10,ALDH1A1,AMACR,ANLN,ANTXR2,ANXA8/ANXA8L1,AP1M2,APOL3,AREG,ARG2,ARHGAP22,ARHGAP26,ARHGAP28,ARHGDIB,ARID3B,ARID4A,ARL5B,ARRDC3,ASB9,ATP6V0D2,ATP8A1,B3GNT7,BBOF1,BMPER,C12orf49,C1orf106,C1QTNF1,C21orf91,C3,CA2,CCDC15,CCDC183,CCDC88C,CCL2,CCL20,CCL5,CCNG1,CCRL2,CD82,CD83,CDA,CDH6,CDKN1A,CDKN1C,CEP68,CFI,CGNL1,CHPT1,CH…	389	34
Lipid Metabolism, Small Molecule Biochemistry	synthesis of platelet activating factor	6.55e-07	Increased	2.392	CD40,CHPT1,CXCL8,PLA2G4A,PTX3,SLC6A6,TNF	7	1
Cell-mediated Immune Response, Cellular Movement, Hematological System Development and Function, Immune Cell Trafficking	cell movement of T lymphocytes	6.69e-07	Increased	2.818	ACKR3,C3,CCL2,CCL20,CCL5,CD40,CTSS,CXCL11,CXCL8,ICAM1,IL6,LCP1,LTB,NLRP3,PDCD1LG2,S1PR1,SAA1,SEMA3A,STAT1,TNF,WNT5A	21	5
Cardiovascular Disease, Organismal Injury and Abnormalities, Skeletal and Muscular Disorders	myocardial infarction	6.69e-07		-0.305	ADORA2B,C3,DUSP6,GDF15,GUCY1B3,HMOX1,IL6,KCNK3,MMP9,NCF2,NT5E,PLAT,PPIF,PTGS1,PTX3,SOAT1,STAT1,THBD,THRB,TLR2,TNF	21	4
Cellular Development, Hematological System Development and Function	differentiation of blood cells	6.83e-07		1.222	ADORA2B,ANLN,ARID4A,BCL2A1,CCL2,CCL5,CD40,CD83,CDKN1A,CLEC4E,CSF2,CXCL1,CXCL5,CXCL8,CYLD,DDX58,EGR1,ELF3,EMP1,ETS1,FZD8,GPR68,HIPK2,HMOX1,HSPA9,ICAM1,ID1,IL6,INHBA,KITLG,KLF4,LCP1,MIR17HG,MMP14,MMP9,NDFIP1,NFYA,PHB2,PLA2G4A,PNP,PRDX3,RCOR1,S1PR1,SEMA3A,SFXN1,SOD2,STAT1,SWAP70,TLR2,TNF,TNFAIP3,VDR,VEGFC	53	16
Cell-To-Cell Signaling and Interaction	response of granulocytes	6.93e-07	Increased	3.1	C3,CSF2,CXCL1,CXCL3,CXCL8,F3,ICAM1,PLAU,PLAUR,PTX3,SAA1,TLR2,TNF	13	3
Gastrointestinal Disease	benign oral disorder	6.94e-07		0.218	C3,CCL20,CCL5,CD40,CDKN1A,CDKN1C,CSF2,CXCL3,EGR1,ELF3,ETV5,F3,FGFR2,IFIH1,INHBA,ITGB6,KITLG,LAMB3,MAP3K1,MMP1,MMP14,MMP9,PLAC8,SFRP4,SLC39A13,STAT1,TLR2,TNF	28	9
Cardiovascular System Development and Function, Organ Morphology	cardiac contractility	6.98e-07		-1.138	F3,FBXO32,GAB1,HBEGF,HMOX1,ICAM1,IL6,MAP3K1,MMP9,PLAT,PLAU,SLC6A6,TLR2,TNF,TRIM55,VAV3,VDR,XDH	18	3
Cell-To-Cell Signaling and Interaction, Hematological System Development and Function, Immune Cell Trafficking, Inflammatory Response	activation of granulocytes	7.23e-07	Increased	2.49	C3,CCL2,CCL5,CSF2,CXCL1,CXCL3,CXCL8,HMOX1,IL6,KITLG,SAA1,TLR2,TNF,VAV3	14	5
Organismal Injury and Abnormalities, Reproductive System Disease	prostatic disease	7.26e-07		1.067	ADAMTS18,AMACR,ANTXR2,APOL3,ARHGDIB,ARID3B,C3,CA2,CCDC15,CCL2,CCL5,CD82,CDKN1A,CEP68,CFI,CTDSPL,EGR1,EPHB1,ETV5,FAM13A,FGFR2,GALNT3,GDF15,GPHN,GPR107,GPR68,GPRC5A,GPRIN3,HIPK2,HMOX1,HSD17B4,IFI44L,IGFBP3,IL6,KLF4,LCP1,LITAF,MAP3K1,MAP3K7CL,MAP9,ME1,MMP1,MMP7,MMP9,MXI1,NT5E,P2RY2,PAPPA,PCSK5,PDE4DIP,PHLDA1,PLAU,PLAUR,PODXL,PTGS1,PTPRN2,RGS3,ROBO4,RPS6KA5,SETBP1,SIRPB1,SLC25A40,SNAP25,SPOCD1,SPRY2,…	73	13
Cell Death and Survival, Organismal Injury and Abnormalities, Renal and Urological Disease	necrosis of kidney	7.27e-07		-1.269	AREG,BCL2A1,CDH6,CDKN1A,EMP1,F3,FGF1,HIPK2,HMOX1,ICAM1,IGFBP3,MAP3K1,MAVS,MLKL,NDEL1,NLRP3,PLA2G4A,PLAT,PLAU,PRDX3,PRKAA1,PTCH1,PTGIS,RGS4,SOD2,TLR2,TNF,TNFRSF19,TRAF1	29	6
Free Radical Scavenging	synthesis of reactive oxygen species	7.64e-07	Increased	2.638	ARHGDIB,C3,CCL5,CD40,CDKN1A,CSF2,CXCL2,CXCL8,ETS1,HAS2,HMOX1,HSPA9,ICAM1,IL4I1,IL6,LCLAT1,MMP1,MMP14,NCF2,PLA2G4A,PLAU,PLAUR,PPIA,PRKAA1,PTGS1,RAP1A,SOD2,SPRY2,STC1,TLR2,TNF,UCP2,VDR,WNT5A,XDH	35	9
Infectious Diseases	replication of Murine herpesvirus 4	7.9e-07		-1.166	CXCL3,DDX58,IFIH1,ISG20,OAS1,SPRY2	6	1
Lipid Metabolism, Small Molecule Biochemistry	synthesis of leukotriene B4	8.01e-07	Increased	2.596	ALOX5AP,CSF2,CXCL1,CXCL3,CXCL8,PLA2G4A,PTGER2,TNF	8	2
Organismal Functions, Organismal Injury and Abnormalities, Tissue Morphology	healing of wound	8.06e-07			AIMP1,C3,CSF2,EGR1,ELK3,FGF1,FGFR2,HBEGF,ICAM1,IL6,MAP3K1,MMP7,MMP9,PLAT,PLAU,PTGS1,SERPINB2,WNT5A	18	6
Organ Morphology	morphology of skin	8.34e-07			AREG,ARID4A,CDKN1A,COL17A1,EGLN3,EGR1,FGF5,FGFR2,HBEGF,HOXA13,IL6,INHBA,ITGB6,KITLG,KLF4,LAMC2,LRIG1,MMP14,PTGER2,SCG5,SLC39A13,SOAT1,SOD2,TNF,TNFAIP3,VDR	26	7
Cellular Development, Embryonic Development, Hair and Skin Development and Function, Organ Development, Organismal Development, Tissue Development	differentiation of epidermal cells	8.57e-07		1.108	ABHD5,CDKN1A,CYLD,ELF3,FGFR2,GAB1,ID1,IL6,KLF4,LRIG1,MAFF,PTCH1,PTGS1,RDH10,SFRP4,TNF,VDR	17	6
Cell Cycle	mitogenesis	8.57e-07		1.116	AREG,CD40,CSF2,FGF1,FGFR2,HBEGF,IGFBP3,IL6,INHBA,KITLG,PTPRN2,PTX3,SPRY2,STAT1,TNF,VAV3,VEGFC	17	6
Cellular Function and Maintenance	ion homeostasis of cells	8.63e-07	Increased	2.66	C1QTNF1,C3,CA2,CCL2,CCL20,CCL5,CD40,CSF2,CXCL1,CXCL2,CXCL3,CXCL5,CXCL8,F3,HERPUD1,HMOX1,IL6,KCNJ16,KCNK1,KITLG,MCU,MMP1,NDFIP1,P2RY2,PPIA,PRKAA1,S1PR1,SAA1,SFRP4,SLC17A5,SLC39A13,SOD2,STC1,STC2,SWAP70,TLR2,TNF,UCP2,VDR,XPR1	40	9
Cancer, Cellular Movement, Organismal Injury and Abnormalities, Tumor Morphology	invasion of tumor cells	9.3e-07	Increased	2.891	AREG,F3,GAB1,GDF15,HBEGF,HMOX1,ID1,IL6,ITGA2,KLF4,MMP1,MMP14,MMP9,PLAU,PLAUR,RHOB,VEGFC,WNT5A	18	9
Cellular Movement	homing of leukemia cell lines	9.39e-07		1.461	CCL2,CCL20,CCL5,CSF2,CXCL8,KITLG,PLAU,PLAUR,PPIA,S1PR1,TNF	11	3
Molecular Transport	transport of molecule	9.45e-07	Increased	2.45	ABHD5,ADORA2B,AP1M2,ATP6V0D2,ATP8A1,BMPER,C3,CA2,CCL2,CCL5,CD40,CLEC4E,CNKSR3,CSF2,CTSS,CXCL2,CXCL3,CXCL8,EGR1,ELL2,FGF1,GAB1,GDF15,GJB2,GSTA4,GUCY1B3,HMOX1,HOOK3,HSPA9,IL6,INHBA,KCNK1,KCNK3,KCNK6,LIN7C,MAFF,MAP4K4,MCU,MFSD2A,MMP7,NDEL1,NDFIP1,NFKBIE,P2RY2,PAPPA,PDZK1,PHB2,PLA2G4A,PNP,PPIA,PRKAA1,PTCH1,PTGS1,PTPRN2,RAP1A,RHOB,SAA1,SCG5,SEC24A,SFRP4,SFXN1,SLC17A5,SLC19A2,SLC1A3,SLC2A12,SLC37A2,SLC…	86	10
Cell Death and Survival	cell death of myeloid cells	9.46e-07		-1.567	BCL2A1,CCL2,CCL5,CD40,CDKN1A,CSF2,CXCL1,CXCL2,CXCL8,HMOX1,IL6,KITLG,NLRP3,PLA2G4A,PLAT,SOAT1,SOD2,STAT1,TLR2,TNF	20	8
Cancer, Gastrointestinal Disease, Organismal Injury and Abnormalities	oral cancer	9.61e-07			CD83,CXCL1,CXCL2,CXCL3,CXCL8,FGF1,FGFR2,G3BP2,HAS2,HMGA2,IGFBP3,IL6,INHBA,LAMC2,LIN7C,PTCH1,SCG5,SERPINB7,SRGN,THBD,TNF	21	6
Cellular Development, Connective Tissue Development and Function, Tissue Development	differentiation of bone	9.67e-07	Increased	2.39	AREG,ATP6V0D2,BMPER,C3,CA2,CCL2,CCL5,CSF2,CXCL8,FGFR2,GPR68,HSD17B4,ID1,IL6,INHBA,KITLG,KLF4,MEF2D,MMP14,PTCH1,PTGER2,SEMA3A,SEMA7A,SFRP4,SIGLEC15,STAT1,STC1,TLR2,TMEM64,TNF,WNT5A	31	9
Cellular Movement, Hematological System Development and Function, Immune Cell Trafficking	transmigration of lymphocytes	9.81e-07		1.769	ACKR3,CCL5,CD40,CTSS,CXCL11,ICAM1,PDCD1LG2,RAP1A,TNF	9	1
Cellular Development, Cellular Growth and Proliferation, Connective Tissue Development and Function, Tissue Development	cell proliferation of fibroblasts	9.94e-07		1.03	AIMP1,CCL2,CCNG1,CD40,CDKN1A,CXCL3,FGF1,GEM,HBEGF,HMOX1,IGFBP3,IL6,MAP3K1,MMP7,MMP9,NFYA,PLAT,PLAU,PLAUR,PLK2,PRKAR2B,PTGER2,SLC7A11,SOD2,SPRY2,STAT1,TNF,WNT5A	28	8
Cellular Movement, Immune Cell Trafficking, Lymphoid Tissue Structure and Development	homing of lymphatic system cells	9.97e-07	Increased	2.035	ACKR3,CCL2,CCL20,CCL5,CD40,CXCL11,CXCL3,CXCL8,KITLG,LCP1,MMP14,MMP9,PPIA,S1PR1,SAA1,VEGFC,WNT5A	17	6
Cell-To-Cell Signaling and Interaction, Hematological System Development and Function	binding of leukocytes	9.97e-07		1.454	C3,CCL2,CCL20,CCL5,CD40,CD83,CSF2,CXCL1,CXCL11,CXCL2,CXCL8,FGF1,ICAM1,KITLG,NT5E,RHOB,THBD,TNF	18	5
Cardiovascular System Development and Function, Organ Development, Skeletal and Muscular System Development and Function	function of cardiac muscle	9.97e-07		-1.311	FBXO32,GAB1,GDF15,HBEGF,HMOX1,ICAM1,IL6,MAP3K1,MMP9,PLAT,PLAU,SLC6A6,TLR2,TNF,TRIM55,VAV3,VDR,XDH	18	2
Cardiovascular Disease, Organismal Injury and Abnormalities	acute coronary syndrome	1e-06		-0.305	ADORA2B,C3,DUSP6,GDF15,GUCY1B3,HMOX1,IL6,KCNK3,MMP9,NCF2,NT5E,PAPPA,PLAT,PPIF,PTGS1,PTX3,SOAT1,STAT1,THBD,THRB,TLR2,TNF	22	4
Organ Morphology	abnormal morphology of skin	1.06e-06			AREG,ARID4A,CDKN1A,EGLN3,EGR1,FGF5,FGFR2,HBEGF,HOXA13,INHBA,ITGB6,KITLG,KLF4,LAMC2,LRIG1,MMP14,SCG5,SLC39A13,SOAT1,TNF,TNFAIP3,VDR	22	6
Cellular Movement, Hematological System Development and Function, Immune Cell Trafficking	cellular infiltration by mononuclear leukocytes	1.07e-06	Increased	2.207	C3,CCL2,CD40,CSF2,CXCL8,GJB2,HMOX1,IL6,LTB,MAVS,MMP14,MMP9,NLRP3,SAA1,STAT1,TNF,UCP2,VAV3	18	6
Embryonic Development, Organismal Development	development of abdomen	1.08e-06	Increased	2.32	ALDH1A1,AREG,CDH6,CDKN1A,CSF2,CTSS,EGR1,FAT4,FGF1,FGFR2,GAB1,GDF15,GEM,HBEGF,HOXA13,ICAM1,IL6,INHBA,ITGA2,JARID2,KITLG,LIN7C,LTB,MMP14,MMP9,PCSK5,PLAT,PLAU,PTCH1,PTGER2,PTPRN2,RDH10,SCG5,SOD2,SPRY2,TLR2,TNF,VEGFC,WNT5A,XDH	40	9
Cancer, Organismal Injury and Abnormalities	abdominal cancer	1.08e-06		0.294	ABHD2,ABHD5,ACKR3,ACSM3,ADAMTS18,ADAMTS9,ADCY7,ADD3,ADORA2B,ADTRP,AFF3,AIMP1,AKR1B10,ALDH1A1,AMACR,ANLN,ANTXR2,ANXA8/ANXA8L1,AP1M2,APOL3,AREG,ARG2,ARHGAP22,ARHGAP26,ARHGAP28,ARHGDIB,ARID3B,ARID4A,ARL5B,ARRDC3,ASB9,ATP6V0D2,ATP8A1,B3GNT7,BBOF1,BMPER,C12orf49,C1orf106,C1QTNF1,C21orf91,C3,CA2,CCDC15,CCDC183,CCDC88C,CCL2,CCL20,CCL5,CCNG1,CCRL2,CD82,CD83,CDA,CDH6,CDKN1A,CDKN1C,CEP68,CFI,CGNL1,CHPT1,CH…	386	34
Cell-To-Cell Signaling and Interaction, Hematological System Development and Function, Immune Cell Trafficking, Inflammatory Response	activation of T lymphocytes	1.13e-06	Increased	2.796	C3,CCL2,CCL5,CD40,CD83,CDKN1A,CSF2,CXCL8,DDX58,ETS1,FGF1,HAVCR1,ICAM1,IL6,KLRC1,LAPTM5,NDFIP1,NT5E,PDCD1LG2,PELI1,PRKAA1,RHOB,SAA1,STAT1,SWAP70,TLR2,TNF,UBE2N	28	8
Inflammatory Disease, Respiratory Disease	Asthma	1.15e-06			ADORA2B,ARG2,C3,CCL2,CCL5,CSF2,CXCL8,HAVCR1,HMOX1,ICAM1,IL6,MMP9,PTGER2,PTGS1,TLR2,TNF,VDR,WNT5A	18	5
Cardiovascular System Development and Function, Tissue Morphology	permeability of vasculature	1.17e-06	Increased	2.497	C3,F3,ICAM1,ID1,MMP9,NT5E,PLAC8,PLAT,PLAU,PTX3,S1PR1,TNF,VEGFC,XDH	14	4
Cell Death and Survival	apoptosis of mononuclear leukocytes	1.18e-06		0.141	AIMP1,BCL2A1,CCL5,CD40,CDKN1A,CSF2,CYLD,EGR1,ETS1,ICAM1,IL6,KITLG,KLF4,LRIG1,MIR17HG,PDCD1LG2,PNP,RCAN1,SLC6A6,STAT1,STK17B,SWAP70,TLR2,TNF,TRAF1,VAV3,VDR,WNT5A	28	9
Cell-To-Cell Signaling and Interaction, Cellular Movement, Hematological System Development and Function, Immune Cell Trafficking, Inflammatory Response	recruitment of dendritic cells	1.2e-06			CCL2,CCL20,CCL5,CD40,CSF2,CXCL3,CXCL8	7	2
Inflammatory Disease, Organismal Injury and Abnormalities, Renal and Urological Disease	cystitis	1.2e-06			ALDH1A1,FGF1,FZD8,HBEGF,SNAP25,TNF	6	0
Organismal Injury and Abnormalities	injury of mice	1.2e-06		0.689	ADORA2B,C3,COL13A1,F3,GPR180,IL6,ITGB6,LITAF,MMP7,MMP9,PTGS1,TNF	12	4
Embryonic Development, Organ Development, Organismal Development, Tissue Development	development of sensory organ	1.21e-06		1.128	ADAMTS18,ADAMTS9,ALDH1A1,AREG,BMPER,CCL2,CDKN1A,CXCL8,ECE1,EGLN3,EGR1,EPHB1,FGF1,FGFR2,GPHN,HIPK2,HOXA13,ICAM1,ID1,IL6,LRIG1,MAP3K1,MPP4,PCSK5,PTPN13,RDH10,SEMA5B,SEMA6A,SEP15,SLC1A3,SLC39A13,SOD2,SPRY2,STAT1,THBD,THRB,TNF,VEGFC,WNT5A	39	10
Inflammatory Disease, Organismal Injury and Abnormalities, Respiratory Disease	fibrosis of lung	1.21e-06		1.159	ADORA2B,ARG2,C3,CSF2,EGR1,FGFR2,HAS2,HMGA2,ICAM1,ID1,IL6,MMP7,NT5E,PLA2G4A,PLAT,PLAU,SEMA7A,SLC7A11,STAT1,TNF	20	6
Infectious Diseases	replication of virus	1.21e-06		-1.541	AREG,ARHGDIB,ARTN,CCL2,CCL5,CD40,COPB2,CTSW,CXCL3,CXCL8,DDX58,EGR1,FGFR2,GAB1,GLYR1,HMOX1,IFIH1,IL6,ILF3,IRF9,ISG20,MAP3K7CL,MAP4K4,MAVS,MMP9,OAS1,P2RY2,PLAU,PPIA,PTX3,RAB11FIP1,RPSA,SP100,SPRY2,STAT1,TAP1,TLR2,TNF	38	10
Cellular Development, Tissue Development	differentiation of epithelial tissue	1.24e-06		0.926	ABHD5,ADAMTS9,BMPER,CDKN1A,CSF2,CYLD,ELF3,FGF1,FGFR2,GAB1,ID1,IGFBP3,IL6,KITLG,KLF4,LRIG1,MAFF,MIR17HG,PLAU,PTCH1,PTGS1,RDH10,SFRP4,THRB,TNF,VDR,VEGFC,XDH	28	9
Inflammatory Disease, Organismal Injury and Abnormalities, Renal and Urological Disease	chronic interstitial cystitis	1.24e-06			FGF1,FZD8,HBEGF,SNAP25,TNF	5	0
Cellular Movement, Hematological System Development and Function, Immune Cell Trafficking, Inflammatory Response	cell movement of monocytes	1.25e-06	Increased	2.932	CCL2,CCL20,CCL5,CSF2,CTSS,CXCL3,CXCL8,ICAM1,IL6,INHBA,MMP14,MMP9,PLAUR,PPIA,SEMA3A,TNF,VAV3	17	4
Cellular Function and Maintenance	function of dendritic cells	1.31e-06		1.982	CD40,CYLD,DDX58,IFIH1,IRAK2,LTB,MAVS,MMP14,MMP9,PDCD1LG2,SEMA3A,TLR2,TNF	13	5
Embryonic Development, Organ Development, Organ Morphology, Organismal Development, Respiratory System Development and Function, Tissue Development	abnormal morphology of lung	1.32e-06			CAV2,CDKN1A,CSF2,CYLD,ELK3,FAT4,FGFR2,HBEGF,ID1,ITGB6,LTB,MMP14,MMP9,RDH10,TLR2,TNF,TRIM55,WNT5A	18	6
Cellular Movement	cell movement of tumor cells	1.32e-06		1.712	CCL2,CCL5,CD82,CXCL11,CXCL8,F3,HBEGF,IL6,KLF4,MAP3K1,MMP14,MMP9,PLAU,PLAUR,RHOB,SPRY2,THRB,WNT5A	18	7
Organ Morphology, Skeletal and Muscular System Development and Function	morphology of skeletal muscle	1.32e-06			CAV2,CDKN1A,COL13A1,ICAM1,IGFBP3,IL6,ILF3,INHBA,MMP14,MMP9,PLA2G4A,SERP1,SLC6A6,SNAP25,SOD2,STC1,TNF,TRIM55	18	4
Cellular Development, Hematological System Development and Function, Hematopoiesis	differentiation of mononuclear leukocytes	1.34e-06		1.196	ADORA2B,ARID4A,BCL2A1,CCL2,CCL5,CD40,CD83,CLEC4E,CSF2,CXCL1,CXCL5,CXCL8,CYLD,DDX58,EGR1,ELF3,ETS1,FZD8,GPR68,HSPA9,ICAM1,ID1,IL6,INHBA,KITLG,KLF4,LCP1,MIR17HG,MMP14,NDFIP1,PHB2,PNP,S1PR1,STAT1,SWAP70,TLR2,TNF,TNFAIP3	38	13
Respiratory Disease	lower respiratory tract disorder	1.37e-06		1.457	ADORA2B,AREG,C3,CA13,CA2,CCL5,CTSS,CXCL11,CXCL3,CXCL8,HMOX1,IL6,ITGB6,KCNK3,MMP1,MMP9,SFRP4,SLC7A11,TNF,VDR	20	4
Endocrine System Disorders, Gastrointestinal Disease, Metabolic Disease	diabetes mellitus	1.38e-06		0.657	ADAMTS9,ADORA2B,ALDH1A1,ALOX5AP,C3,CA13,CA2,CCL2,CCL5,CCNG1,CD40,CDKN1A,COL13A1,COL17A1,CTSS,CTSW,CXCL8,ENAH,F3,FGF1,FRMD4B,GDF15,GPD2,HAVCR1,ICAM1,ID1,IFI44,IFIH1,IL6,KCNK3,KLF4,KMO,LCP1,LRIG1,MMP9,NCF2,NLRP3,NT5E,OAS1,PDCD1LG2,PTGER2,PTGIS,PTGS1,RHOB,SERPIND1,SIRPB1,SLC7A11,SOAT1,SOD2,STAT1,TAP1,THBD,THRB,TLR2,TNF,UBE2N,UCP2,VDR,VEPH1,XDH,ZNF165,ZNRD1,ZSCAN31	63	9
Cardiovascular System Development and Function, Cell Morphology, Cellular Development, Organismal Development, Tissue Development	tubulation of endothelial cells	1.41e-06		1.179	CXCL1,CXCL8,FGF5,ID1,IGFBP3,IL6,PLAU,PLAUR,RCAN1,RHOB,SAA1,SERPIND1,TAB2,VEGFC	14	6
Cancer, Organismal Injury and Abnormalities, Reproductive System Disease	male genital neoplasm	1.48e-06		1.067	ADAMTS18,ADORA2B,AMACR,ANTXR2,APOL3,ARHGDIB,ARID3B,ARL5B,C3,CA2,CCDC15,CCL2,CCL5,CD82,CDKN1A,CEP68,CFI,CTDSPL,EGR1,EPHB1,ETV5,FAM13A,FGFR2,GALNT3,GDF15,GPHN,GPR107,GPR68,GPRC5A,GPRIN3,HIPK2,HMOX1,HSD17B4,IFI44L,IGFBP3,IL6,KITLG,KLF4,LCP1,LITAF,MAP3K1,MAP3K7CL,MAP9,ME1,MMP1,MMP7,MMP9,MXI1,NT5E,P2RY2,PAPPA,PCSK5,PDE4DIP,PHLDA1,PLAUR,PODXL,PTGS1,PTPRN2,RGS3,ROBO4,RPS6KA5,SETBP1,SIRPB1,SLC25A40,SPOCD…	74	14
Cell Signaling	protein kinase cascade	1.49e-06		-1.112	ADORA2B,APOL3,C1QTNF1,CAV2,CCL2,CCL5,EPHB1,FGFR2,GAB1,HIPK2,HMOX1,ID1,IGFBP3,IL6,IRAK2,LITAF,MAP3K1,MAP4K4,MAVS,NDFIP1,PELI1,PLK2,SFRP4,SLC44A2,STAT1,TNF,TNFAIP3,TNFRSF19,UBE2N,WNT5A,ZAK	31	12
Inflammatory Response, Neurological Disease	inflammation of central nervous system	1.5e-06	Increased	2.027	ADORA2B,C3,CD40,CLEC4E,CSF2,ENTPD7,ID1,IL6,IRF9,KLF4,MAVS,MIR17HG,MMP9,NLRP3,NT5E,PDCD1LG2,PELI1,PLA2G4A,PLAT,PTGER2,S1PR1,STAT1,STK17B,TLR2,TNF,TNFAIP3,TSPAN2,VDR,VEGFC	29	8
Cell-To-Cell Signaling and Interaction	attachment of cells	1.52e-06		1.944	EGR1,EPHB1,ETS1,F3,ICAM1,IL6,ITGA2,PODXL,PTGER2,RHOB,RPSA,SEMA3A,SPRY2,SWAP70,TNF	15	5
Cellular Development	differentiation of lymphatic system cells	1.53e-06		0.897	ADORA2B,BCL2A1,C3,CCL5,CD40,CD83,CDKN1A,CLEC4E,CSF2,CXCL1,CXCL5,CYLD,DDX58,EGR1,ELF3,ETS1,FZD8,HSPA9,ICAM1,ID1,IL6,INHBA,KITLG,KLF4,LCP1,MIR17HG,MMP14,MMP9,NDFIP1,NFYA,PHB2,PNP,RCOR1,S1PR1,SEMA3A,STAT1,SWAP70,TNF,TNFAIP3,VDR	40	13
Cancer, Organismal Injury and Abnormalities	angiogenesis of tumor	1.55e-06		0.428	CSF2,CTSS,F3,FGFR2,MIR17HG,MMP1,MMP14,MMP9,PTGER2,SEMA6A,THBD,TNF,VAV3,VEGFC	14	5
Cellular Development	differentiation of tumor cell lines	1.56e-06		1.358	CDKN1A,CSF2,CTDSPL,EGR1,EID1,ETV5,FGF5,FGFR2,HAVCR1,HMOX1,ID1,IL6,INHBA,KITLG,KLF4,NFYA,PLAT,PLAUR,PPIA,PRDX3,PRKAR2B,PTGER2,SERPINB2,SPRY2,STAT1,THBD,THRB,TNF,VDR	29	8
Cancer, Cell Cycle, Organismal Injury and Abnormalities	interphase of cancer cells	1.59e-06			CDKN1A,CYLD,EGR1,FGF1,IL6,INHBA,TNF	7	4
Cell Morphology, Organ Morphology, Skeletal and Muscular System Development and Function, Tissue Morphology	morphology of skeletal muscle cells	1.59e-06			CAV2,CDKN1A,COL13A1,IL6,ILF3,MMP14,PLA2G4A,SLC6A6,SOD2,TNF,TRIM55	11	2
Free Radical Scavenging	production of reactive oxygen species	1.74e-06	Increased	2.644	ARHGDIB,C3,CCL5,CD40,CDKN1A,CSF2,CXCL2,CXCL8,ETS1,HAS2,HMOX1,HSPA9,ICAM1,IL4I1,IL6,LCLAT1,MMP1,NCF2,PLA2G4A,PPIA,PRKAA1,PTGS1,SOD2,TLR2,TNF,UCP2,WNT5A,XDH	28	8
Gene Expression	binding of interferon-stimulated response element	1.76e-06		0.714	DDX58,IRF9,PLAU,STAT1,TNF,TNFAIP3	6	3
Cellular Movement, Hematological System Development and Function, Immune Cell Trafficking	cellular infiltration by lymphocytes	1.77e-06		1.758	C3,CCL2,CD40,CXCL8,GJB2,HMOX1,IL6,LTB,MAVS,MMP14,NLRP3,SAA1,STAT1,TNF,UCP2,VAV3	16	5
Developmental Disorder	hypertrophy of tissue	1.83e-06		-0.116	CA2,CSF2,ECE1,FBXO32,GDF15,HBEGF,IL6,INHBA,MMP1,MMP9,MTPN,PLAU,PPIA,PRDX3,PRKAA1,RGS4,STC1,TLR2,TNF,TNFAIP3,TRIM55,WNT5A	22	6
Cellular Development, Cellular Growth and Proliferation, Hematological System Development and Function	proliferation of myeloid cells	1.85e-06		-0.242	CCL2,CCL20,CD40,CSF2,CXCL2,CXCL3,CXCL8,HMOX1,IL6,KITLG,SETBP1,TLR2,TNF,XDH	14	5
Cancer, Organismal Injury and Abnormalities, Reproductive System Disease	Prostate Cancer and Tumors	1.86e-06		1.067	ADAMTS18,AMACR,ANTXR2,APOL3,ARHGDIB,ARID3B,C3,CA2,CCDC15,CCL2,CCL5,CD82,CDKN1A,CEP68,CFI,CTDSPL,EGR1,EPHB1,ETV5,FAM13A,FGFR2,GALNT3,GDF15,GPHN,GPR107,GPR68,GPRC5A,GPRIN3,HIPK2,HMOX1,HSD17B4,IFI44L,IGFBP3,IL6,KLF4,LCP1,LITAF,MAP3K1,MAP3K7CL,MAP9,ME1,MMP1,MMP7,MMP9,MXI1,NT5E,P2RY2,PAPPA,PCSK5,PDE4DIP,PHLDA1,PLAUR,PODXL,PTGS1,PTPRN2,RGS3,ROBO4,RPS6KA5,SETBP1,SIRPB1,SLC25A40,SPOCD1,SPRY2,STAT1,STEAP1…	71	13
Metabolic Disease	glucose metabolism disorder	1.88e-06		-0.023	ABHD5,ADAMTS9,ADORA2B,ALDH1A1,ALOX5AP,C3,CA13,CA2,CCL2,CCL5,CCNG1,CD40,CDKN1A,COL13A1,COL17A1,CSF2,CTSS,CTSW,CXCL8,CYB5R4,DNAJB9,ENAH,F3,FGF1,FGFR2,FRMD4B,GDF15,GPD2,HAVCR1,ICAM1,ID1,IFI44,IFIH1,IGFBP3,IL6,KCNK3,KLF4,KMO,LCP1,LRIG1,MMP9,NCF2,NLRP3,NT5E,OAS1,PDCD1LG2,PTGER2,PTGIS,PTGS1,RGS4,RHOB,SCG5,SERPIND1,SIRPB1,SLC6A6,SLC7A11,SOAT1,SOD2,STAT1,TAP1,THBD,THRB,TLR2,TNF,UBE2N,UCP2,VDR,VEPH1,XDH,Z…	72	11
Cell-To-Cell Signaling and Interaction, Cellular Growth and Proliferation, Hematological System Development and Function, Inflammatory Response	stimulation of phagocytes	1.91e-06	Increased	2.366	CCL20,CD40,CSF2,CXCL5,CXCL8,IL6,KITLG,TLR2,TNF,WNT5A	10	4
Lipid Metabolism, Molecular Transport, Small Molecule Biochemistry	secretion of lipid	1.97e-06		1.997	ABHD5,CSF2,CXCL8,EGR1,ELL2,HMOX1,IL6,INHBA,MAFF,P2RY2,PLA2G4A,PRKAA1,PTGS1,PTPRN2,SOAT1,SOD2,TNF,VDR	18	4
Cell-To-Cell Signaling and Interaction, Cellular Growth and Proliferation	induction of cells	2.03e-06	Increased	2.663	CD40,CD83,CLEC4E,CSF2,CXCL8,IL6,INHBA,KITLG,KLF4,KLRC1,STEAP1,TNF,TNFAIP3,WNT5A	14	6
Cardiovascular System Development and Function, Organ Morphology, Organismal Development	morphology of heart	2.03e-06			ACKR3,ADAMTS9,ARG2,ARID3B,CDKN1A,CLEC4E,DHRS3,DUSP6,ECE1,F3,FAT4,GDF15,HAS2,HBEGF,HMOX1,IL6,ITGA2,KITLG,MAP3K1,MMP14,MMP9,PLA2G4A,RCAN1,RGS4,SCG5,SEMA3A,SLC6A6,SOD2,THBD,TLR2,TNF,TRIM55,VAV3,VDR	34	7
Cancer, Organismal Injury and Abnormalities, Tumor Morphology	invasion of carcinoma	2.04e-06		1.633	CCL2,CD82,CDKN1C,ICAM1,ID1,ITGA2,MMP9,PLAU,PLAUR,THRB,WNT5A	11	6
Cancer, Organismal Injury and Abnormalities, Reproductive System Disease	metastasis of breast cancer cell lines	2.04e-06		1.528	CCL2,CXCL1,CXCL2,CXCL3,INHBA,ITGA2,PLAUR,TLR2,TNF,UBE2N,VAV3	11	4
Cellular Movement, Hematological System Development and Function, Immune Cell Trafficking, Inflammatory Response	migration of monocytes	2.11e-06	Increased	2.906	CCL2,CCL20,CCL5,CSF2,CTSS,ICAM1,IL6,MMP14,MMP9,PLAUR,SEMA3A,TNF	12	3
Protein Synthesis	quantity of interleukin	2.11e-06		1.877	ARHGDIB,C3,CLEC4E,F3,IL6,IRAK2,MAVS,MMP9,NLRP3,PPIA,RPS6KA5,STAT1,THBD,TLR2,TNF	15	7
Organismal Injury and Abnormalities, Renal and Urological Disease	urination disorder	2.11e-06		-1.265	C3,CCL2,CCL5,CDKN1A,GAL3ST1,GDF15,HBEGF,ICAM1,IL6,KCNK1,LIN7C,MMP9,MTRR,NLRP3,PODXL,PTGS1,SNAP25,SOD2,STC1,SUCLA2,THBD,TLR2,VDR,XDH	24	4
Lipid Metabolism, Molecular Transport, Small Molecule Biochemistry	concentration of lipid	2.13e-06		0.238	ABHD5,ADORA2B,ALDH1A1,ALOX5AP,AMACR,C3,CCL2,CDKN1A,CERS6,CNEP1R1,CSF2,CTSS,CXCL8,DHRS3,EGR1,FGFR2,GAL3ST1,GALNT3,GPD2,HMOX1,HSD17B4,ICAM1,IL6,INHBA,KCNK3,KITLG,MFSD2A,MMP9,P2RY2,PDZK1,PLA2G4A,PLAT,PRDX3,PRKAA1,PRKAR2B,PTGIS,PTGS1,RGS4,SAA1,SCG5,SEC24A,SOAT1,SOD2,THRB,TLR2,TNF,UCP2,VAV3,VDR,XDH	50	9
Cell Morphology	morphology of tumor cell lines	2.14e-06			CD40,CDKN1A,CDKN1C,DNAJB6,EGR1,FGFR2,GAL3ST1,GDF15,GEM,HBEGF,ID1,IL6,KITLG,KLF4,MMP14,NEFL,PRKAR2B,SOD2,THBD,TNF,WNT5A	21	10
Cancer, Organismal Injury and Abnormalities	metastatic solid tumor	2.2e-06		1.465	ACKR3,CCL2,CCL5,CDH6,CSF2,CXCL8,DNAJB6,DUSP6,EMP1,ENAH,FGF1,FGFR2,GDF15,HMOX1,ICAM1,IL6,LAMB3,LTB,MMP1,MMP14,MMP7,MMP9,NT5E,PAPPA,PLAT,PLAU,PLAUR,PPIA,PTX3,RGS4,SLC7A11,STAT1,THBD,THRB,TLR2,VEGFC,WNT5A	37	11
Gastrointestinal Disease, Hepatic System Disease, Organismal Injury and Abnormalities	injury of liver	2.2e-06		0.331	CCL2,CCL5,CD40,CDKN1A,CXCL1,CXCL8,EGR1,HMOX1,IL6,INHBA,LTB,MMP9,NLRP3,NT5E,SAA1,SAA2,STAT1,TLR2,TNF,TRAF1	20	8
Cardiovascular System Development and Function, Organismal Development	formation of neointima	2.2e-06		0	ACKR3,CCL2,F3,GUCY1B3,INHBA,KITLG,KLF4,PLAU,PTGIS,SOD2	10	4
Cellular Movement, Hematological System Development and Function, Immune Cell Trafficking	transmigration of myeloid cells	2.2e-06		0.845	CCL2,CXCL3,CXCL5,CXCL8,GDF15,ICAM1,MMP14,MMP9,TNF,VAV3	10	3
Dermatological Diseases and Conditions	plaque psoriasis	2.21e-06			CCL2,CCL20,CSF2,CXCL11,CXCL8,GJB2,HMOX1,ITGA2,NRP2,SEMA3A,STAT1,TNF,VDR,WNT5A	14	5
Cell-To-Cell Signaling and Interaction, Cellular Growth and Proliferation, Hematological System Development and Function, Inflammatory Response	stimulation of neutrophils	2.24e-06		1.961	CSF2,CXCL5,CXCL8,TLR2,TNF	5	1
Skeletal and Muscular System Development and Function	size of muscle	2.29e-06			CAV2,CDKN1A,GDF15,ICAM1,IL6,KITLG,MAP3K1,MMP14,PRKAA1,RGS4,SOD2,STC1,TNF,TRIM55,VDR	15	4
Cellular Development, Connective Tissue Development and Function, Tissue Development	differentiation of bone cells	2.32e-06	Increased	2.278	AREG,ATP6V0D2,BMPER,C3,CA2,CCL2,CCL5,CSF2,CXCL8,FGFR2,GPR68,HSD17B4,ID1,IL6,INHBA,KLF4,MEF2D,MMP14,PTCH1,PTGER2,SEMA3A,SEMA7A,SFRP4,SIGLEC15,STAT1,STC1,TLR2,TMEM64,TNF,WNT5A	30	8
Cellular Movement, Hematological System Development and Function, Immune Cell Trafficking	transendothelial migration of leukocytes	2.37e-06		0.013	CXCL11,CXCL8,GDF15,ICAM1,KITLG,RAP1A,STC1,TNF	8	3
Cancer, Organismal Injury and Abnormalities	neoplasia of cells	2.48e-06		1.827	ADAMTS18,ADAMTS9,ADCY7,AFF3,ANLN,AREG,ARG2,ARID3B,ARRDC3,ARTN,ATP8A1,C3,C7orf73,CA13,CA2,CCDC85B,CCL2,CD40,CD82,CD83,CDH6,CDKN1A,CNOT6,COPB2,CORO2B,CSF2,CSGALNACT2,CTDSPL,CXCL1,CXCL2,CXCL3,CXCL5,CXCL8,CYLD,DDX58,DNAJB6,DNMBP,DOCK4,EGR1,ELF3,ENAH,EPSTI1,ERLIN2,ETS1,F3,FAM107B,FAM127C,FAT4,FGF1,FGF5,FGFR2,FHDC1,GAL3ST1,GLCCI1,GLYR1,GPRIN3,HAS2,HAVCR1,HBEGF,HMGA2,HMOX1,HOXA13,ID1,IFI44,IGFBP3,IL6,IL…	170	24
Infectious Diseases	infection by Picornaviridae	2.53e-06			CCL5,CXCL5,CXCL8,ICAM1,IFIH1,STAT1	6	2
Cell-To-Cell Signaling and Interaction, Cellular Movement	chemoattraction	2.61e-06	Increased	2.208	ARTN,C3,CCL2,CCL20,CCL5,CXCL1,CXCL3,CXCL8,RGS3,SEMA3A,TNF,VEGFC	12	4
Immunological Disease	allergy	2.61e-06		1.4	ADORA2B,ALOX5AP,C3,CCL20,CCL5,CCRL2,CD40,CSF2,CTSS,CXCL1,CXCL8,HAVCR1,ICAM1,IL6,KITLG,LY96,MMP9,MXI1,PDCD1LG2,PLA2G4A,PPIA,PTGER2,PTGS1,STARD7,STAT1,TLR2,TNF,TNFAIP3,VAV3,ZNF395	30	7
Neurological Disease	demyelination of spinal cord	2.68e-06		1.633	C3,CCL2,CCL5,CSF2,PLAT,TNF,TNFAIP3	7	2
Lymphoid Tissue Structure and Development, Tissue Development	growth of lymphoid tissue	2.73e-06		0.557	CD40,CDKN1A,CXCL8,EGR1,FGF1,FGFR2,IL6,INHBA,KITLG,KLF4,MIR17HG,SETBP1,TLR2,TNF,TNFAIP3,UBE2N,VDR,VEGFC	18	9
Cellular Movement	cell movement of connective tissue cells	2.77e-06		1.252	AIMP1,CCL2,CCL5,CDKN1A,ENAH,EPHB1,FGF1,HBEGF,IL6,MAP3K1,MMP1,MMP14,MMP7,PLAU,PLAUR,RHOB,S1PR1,SEMA3A,TNF,WNT5A	20	6
Embryonic Development, Organ Development, Organismal Development, Tissue Development, Visual System Development and Function	formation of eye	2.85e-06		1.118	ADAMTS18,ADAMTS9,ALDH1A1,AREG,CCL2,CDKN1A,CXCL8,EGLN3,EGR1,EPHB1,FGF1,FGFR2,GPHN,HIPK2,ICAM1,ID1,IL6,MAP3K1,MPP4,PTPN13,RDH10,SEMA5B,SEMA6A,SEP15,SLC1A3,SLC39A13,SOD2,STAT1,THBD,THRB,TNF,VEGFC	32	9
Cellular Movement, Hematological System Development and Function, Immune Cell Trafficking, Inflammatory Response, Lymphoid Tissue Structure and Development	chemotaxis of lymphocytes	2.87e-06		1.954	ACKR3,CCL2,CCL20,CCL5,CD40,CXCL11,CXCL3,CXCL8,LCP1,MMP9,PPIA,S1PR1,SAA1,WNT5A	14	4
Hematological System Development and Function, Inflammatory Response, Tissue Morphology	quantity of dendritic cells	2.87e-06		1.95	BCL2A1,CCL2,CCL20,CD83,CLEC4E,CSF2,HBEGF,ITGB6,LTB,MAVS,MMP9,TLR2,TNF,VDR	14	3
Cell Morphology, Organ Morphology, Skeletal and Muscular System Development and Function, Tissue Morphology	size of muscle cells	2.87e-06			CAV2,CDKN1A,GDF15,ICAM1,IL6,KITLG,MAP3K1,MMP14,PRKAA1,RGS4,SOD2,TNF,TRIM55,VDR	14	4
Embryonic Development, Organismal Development	development of head	2.89e-06		1.417	ADAMTS18,ADAMTS9,ALDH1A1,AREG,BMPER,CCL2,CDKN1A,CXCL3,CXCL8,DHRS3,DNER,ECE1,EGLN3,EGR1,ENAH,EPHB1,F3,FAT4,FGF1,FGFR2,GPHN,HIPK2,HOXA13,ICAM1,ID1,IL6,INHBA,LRIG1,MAP3K1,MMP14,MPP4,NDEL1,NRP2,PCSK5,PKDCC,PLAU,PLCB4,PRDM8,PTCH1,PTPN13,RDH10,RPSA,S1PR1,SEMA3A,SEMA5B,SEMA6A,SEP15,SLC1A3,SLC39A13,SOD2,SPRY2,STAT1,THBD,THRB,TLR2,TNF,VEGFC,WNT5A	58	11
Infectious Diseases	infection by Influenza A virus	2.89e-06			AREG,C3,CCL2,CCL5,CXCL1,CXCL8,IL6,PTX3	8	4
Cell Death and Survival	cell death of lymphoblastoid cell lines	2.9e-06		0.505	CDA,CDKN1A,IL6,LRIG1,NT5E,PTPRR,SOD2,STAT1,TERF1,TNF,VAV3,WNT5A	12	4
Cellular Movement, Hematological System Development and Function, Immune Cell Trafficking, Inflammatory Response	cell movement of dendritic cells	2.98e-06		1.718	C3,CCL2,CCL20,CCL5,CCRL2,CD40,CSF2,CXCL11,CXCL8,ICAM1,NLRP3,NRP2,PLAU,S1PR1,SWAP70,TNF	16	2
Cellular Movement	cell movement of leukemia cell lines	3.14e-06		1.831	CCL2,CCL20,CCL5,CSF2,CXCL8,GAB1,KITLG,MMP9,PLAU,PLAUR,PPIA,S1PR1,TNF,WNT5A,XDH	15	5
Organismal Injury and Abnormalities, Respiratory Disease	acute lung injury	3.22e-06		1.387	ADORA2B,C3,CXCL8,CYLD,F3,ICAM1,IGFBP3,IL6,NLRP3,PTGS1,S1PR1,TNF	12	5
Cell Death and Survival	apoptosis of lymphatic system cells	3.24e-06		-0.382	ADORA2B,AIMP1,BCL2A1,CCL5,CD40,CDKN1A,CSF2,CYLD,EGR1,ETS1,ICAM1,IL6,KITLG,LRIG1,MIR17HG,PDCD1LG2,PNP,RCAN1,SLC6A6,STAT1,STK17B,SWAP70,TLR2,TNF,TRAF1,VAV3,VDR,WNT5A	28	8
Cell-To-Cell Signaling and Interaction, Cellular Compromise	respiratory burst of cells	3.24e-06	Increased	2.574	C3,CCL2,CXCL1,CXCL2,CXCL3,CXCL8,F3,ICAM1,TNF	9	5
Cancer, Organismal Injury and Abnormalities	pelvic tumor	3.28e-06		0.555	ACSM3,ADAMTS18,ADD3,AFF3,ALDH1A1,AMACR,ANLN,ANTXR2,ANXA8/ANXA8L1,APOL3,AREG,ARG2,ARHGDIB,ARID3B,ARID4A,ARRDC3,ATP8A1,BMPER,C1orf106,C3,CA2,CCDC15,CCL2,CCL5,CD82,CD83,CDA,CDKN1A,CEP68,CFI,CNOT6,COL13A1,COL17A1,CORO2B,CSF2,CSGALNACT2,CTDSPL,CTDSPL2,CTSS,CXCL11,CXCL8,CYB5R4,DDX58,DNAJB6,DNER,DOCK4,EGR1,ELF3,ELL2,ENTPD7,EPHB1,ERLIN2,ETS1,ETV5,F3,FAM127C,FAM13A,FAT4,FGF1,FGF5,FGFR2,FHDC1,FILIP1L,G3BP2…	206	22
Cell-To-Cell Signaling and Interaction, Renal and Urological System Development and Function	adhesion of kidney cells	3.28e-06	Increased	2.442	C3,CCL2,CXCL8,EPHB1,HBEGF,ICAM1,PLAU,PLAUR,RAP1A,SOD2,TNF	11	3
Hematological System Development and Function, Tissue Morphology	quantity of granulocytes	3.29e-06		1.704	ARHGDIB,ARID4A,C3,CCL2,CD40,CDKN1A,CLEC4E,CSF2,CXCL8,DDX58,F3,ICAM1,ID1,IGFBP3,IL6,JARID2,KITLG,MMP9,NDFIP1,PLAC8,SERPINB2,TLR2,TNF,TNFAIP3,VDR	25	11
Cancer, Organismal Injury and Abnormalities, Reproductive System Disease	prostate cancer	3.29e-06			ADAMTS18,AMACR,ANTXR2,APOL3,ARHGDIB,ARID3B,C3,CA2,CCDC15,CCL2,CCL5,CD82,CDKN1A,CEP68,CFI,CTDSPL,EPHB1,ETV5,FAM13A,FGFR2,GALNT3,GDF15,GPHN,GPR107,GPR68,GPRC5A,GPRIN3,HIPK2,HMOX1,HSD17B4,IFI44L,IGFBP3,IL6,KLF4,LCP1,LITAF,MAP3K1,MAP3K7CL,MAP9,ME1,MMP1,MMP7,MMP9,MXI1,NT5E,P2RY2,PAPPA,PCSK5,PDE4DIP,PHLDA1,PLAUR,PODXL,PTGS1,PTPRN2,RGS3,ROBO4,RPS6KA5,SETBP1,SIRPB1,SLC25A40,SPOCD1,STAT1,STEAP1B,TLR2,TNF,…	69	12
Cellular Movement	cell movement of lymphoma cell lines	3.32e-06		1.174	CCL2,CCL20,CCL5,CD40,CXCL8,IL6,LAMC2,RGS3,S1PR1,TNF	10	3
Cell Morphology	morphology of leukocytes	3.35e-06			ABHD5,ARID4A,C3,CCL2,CD40,CDKN1A,CSF2,CXCL11,CXCL8,CYLD,DDX58,EGR1,ETS1,FGFR2,ICAM1,ID1,IL6,ITGB6,KITLG,LTB,MMP9,MXI1,RCAN1,SOAT1,STAT1,TAP1,TNF	27	13
Cancer, Organismal Injury and Abnormalities, Reproductive System Disease	genital tract cancer	3.43e-06		1	ACSM3,ADAMTS18,ADD3,ADORA2B,AFF3,ALDH1A1,AMACR,ANLN,ANTXR2,ANXA8/ANXA8L1,APOL3,ARG2,ARHGDIB,ARID3B,ARID4A,ARL5B,ARRDC3,ATP8A1,BMPER,C1orf106,C3,CA2,CCDC15,CCL2,CCL5,CD82,CD83,CDA,CDKN1A,CEP68,CFI,CNOT6,COL13A1,COL17A1,CORO2B,CSF2,CSGALNACT2,CTDSPL,CTDSPL2,CTSS,CXCL11,CXCL8,DDX58,DNAJB6,DNER,DOCK4,ELF3,ELL2,ENTPD7,EPHB1,ERLIN2,ETV5,F3,FAM127C,FAM13A,FAT4,FGF1,FGF5,FGFR2,FHDC1,FILIP1L,G3BP2,GALNT3,…	194	20
Cell Morphology, Cellular Assembly and Organization, Cellular Function and Maintenance	formation of lamellipodia	3.45e-06		-0.823	CCL2,CD82,FGF1,GAB1,KITLG,LCP1,MAP3K1,NCF2,PHLDB2,PLAU,RHOB,S1PR1,SEMA3A,SIRPB1,SWAP70,VAV3	16	2
Cell Cycle	interphase of brain cancer cell lines	3.5e-06			CDKN1A,CDKN1C,MMP9,MXI1,PLAU,PLAUR,PPIF,PRKAA1	8	4
Cancer, Organismal Injury and Abnormalities	pelvic cancer	3.51e-06		1	ACSM3,ADAMTS18,ADD3,AFF3,ALDH1A1,AMACR,ANLN,ANTXR2,ANXA8/ANXA8L1,APOL3,AREG,ARG2,ARHGDIB,ARID3B,ARID4A,ARRDC3,ATP8A1,BMPER,C1orf106,C3,CA2,CCDC15,CCL2,CCL5,CD82,CD83,CDA,CDKN1A,CEP68,CFI,CNOT6,COL13A1,COL17A1,CORO2B,CSF2,CSGALNACT2,CTDSPL,CTDSPL2,CTSS,CXCL11,CXCL8,CYB5R4,DDX58,DNAJB6,DNER,DOCK4,EGR1,ELF3,ELL2,ENTPD7,EPHB1,ERLIN2,ETS1,ETV5,F3,FAM127C,FAM13A,FAT4,FGF1,FGF5,FGFR2,FHDC1,FILIP1L,G3BP2…	205	22
Infectious Diseases	infection by rotavirus	3.54e-06			CCL2,CCL5,CXCL1,CXCL8	4	3
Cell-To-Cell Signaling and Interaction, Cell-mediated Immune Response, Cellular Movement, Hematological System Development and Function, Immune Cell Trafficking	recruitment of Th17 cells	3.54e-06		1.236	CCL2,CCL20,CCL5,PELI1	4	1
Cell Morphology, Cellular Assembly and Organization, Cellular Function and Maintenance	extension of cellular protrusions	3.55e-06		1.037	CCL2,CD82,CDKN1A,CSF2,CXCL8,DOCK4,GEM,IL6,INHBA,KITLG,NDEL1,NRP2,PLAT,PPP1R9A,RUFY3,S1PR1,SEMA3A,SEMA5B,SEMA7A	19	5
Cancer, Organismal Injury and Abnormalities, Reproductive System Disease	malignant neoplasm of male genital organ	3.59e-06			ADAMTS18,ADORA2B,AMACR,ANTXR2,APOL3,ARHGDIB,ARID3B,ARL5B,C3,CA2,CCDC15,CCL2,CCL5,CD82,CDKN1A,CEP68,CFI,CTDSPL,EPHB1,ETV5,FAM13A,FGFR2,GALNT3,GDF15,GPHN,GPR107,GPR68,GPRC5A,GPRIN3,HIPK2,HMOX1,HSD17B4,IFI44L,IGFBP3,IL6,KLF4,LCP1,LITAF,MAP3K1,MAP3K7CL,MAP9,ME1,MMP1,MMP7,MMP9,MXI1,NT5E,P2RY2,PAPPA,PCSK5,PDE4DIP,PHLDA1,PLAUR,PODXL,PTGS1,PTPRN2,RGS3,ROBO4,RPS6KA5,SETBP1,SIRPB1,SLC25A40,SPOCD1,STAT1,STE…	71	12
Hematological Disease	hemorrhagic disease	3.6e-06		1.156	ARID4A,C3,CCL2,CCL5,CDA,CXCL1,CXCL8,EGR1,F3,GALNT3,HAVCR1,ID1,IL6,MMP9,PLAT,PRDX3,PROCR,PTGS1,S1PR1,SERPINB2,THBD,TNF	22	8
Cell Death and Survival	cell viability of macrophage cancer cell lines	3.76e-06		-0.092	ANTXR2,BCL2A1,PLAT,SERPINB2,TNF	5	0
Cellular Movement, Hematological System Development and Function	mobilization of blood cells	3.79e-06		1.294	CCL2,CCL20,CSF2,CXCL2,CXCL3,CXCL8,KITLG,ROBO4,STAT1,TNF	10	5

## Sheet: Detail
Categories	Diseases or Functions Annotation	p-Value	Predicted Activation State	Activation z-score	Molecules	Entrez Gene Name	Location	Type(s)	Corrected_p-value	P value	Regulation	FCAbsolute	Fold_Change	Log_FC	# Molecules
Cardiovascular System Development and Function	development of vasculature	7.59e-25	Increased	2.67	ACKR3	atypical chemokine receptor 3	Plasma Membrane	G-protein coupled receptor	0.00018251	2.96362e-05	up	2.02777	2.02777	1.0199	101
Cardiovascular System Development and Function	development of vasculature	7.59e-25	Increased	2.67	ADORA2B	adenosine A2b receptor	Plasma Membrane	G-protein coupled receptor	0.000155574	2.11387e-05	up	2.26916	2.26916	1.18216	101
Cardiovascular System Development and Function	development of vasculature	7.59e-25	Increased	2.67	AIMP1	aminoacyl tRNA synthetase complex-interacting multifunctional protein 1	Extracellular Space	cytokine	0.00061013	0.000272183	down	2.17524	-2.17524	-1.12117	101
Cardiovascular System Development and Function	development of vasculature	7.59e-25	Increased	2.67	ANTXR2	anthrax toxin receptor 2	Plasma Membrane	transmembrane receptor	5.23957e-05	1.20403e-06	up	5.25029	5.25029	2.3924	101
Cardiovascular System Development and Function	development of vasculature	7.59e-25	Increased	2.67	ARHGAP22	Rho GTPase activating protein 22	Cytoplasm	other	4.21995e-05	4.57747e-07	up	2.59293	2.59293	1.37458	101
Cardiovascular System Development and Function	development of vasculature	7.59e-25	Increased	2.67	ARID3B	AT-rich interaction domain 3B	Nucleus	transcription regulator	6.27081e-05	2.39932e-06	up	2.2713	2.2713	1.18352	101
Cardiovascular System Development and Function	development of vasculature	7.59e-25	Increased	2.67	ARID4A	AT-rich interaction domain 4A	Nucleus	transcription regulator	0.00031447	8.54576e-05	down	2.07523	-2.07523	-1.05327	101
Cardiovascular System Development and Function	development of vasculature	7.59e-25	Increased	2.67	BMPER	BMP binding endothelial regulator	Extracellular Space	other	0.000275311	6.53595e-05	up	4.43084	4.43084	2.14758	101
Cardiovascular System Development and Function	development of vasculature	7.59e-25	Increased	2.67	C3	complement component 3	Extracellular Space	peptidase	0.000166276	2.38974e-05	up	3.15758	3.15758	1.65882	101
Cardiovascular System Development and Function	development of vasculature	7.59e-25	Increased	2.67	CAV2	caveolin 2	Plasma Membrane	other	0.000299487	7.77613e-05	down	2.2358	-2.2358	-1.16079	101
Cardiovascular System Development and Function	development of vasculature	7.59e-25	Increased	2.67	CCL2	C-C motif chemokine ligand 2	Extracellular Space	cytokine	5.71384e-05	1.64325e-06	up	4.18932	4.18932	2.06672	101
Cardiovascular System Development and Function	development of vasculature	7.59e-25	Increased	2.67	CCL5	C-C motif chemokine ligand 5	Extracellular Space	cytokine	0.000244253	5.08419e-05	up	3.69923	3.69923	1.88723	101
Cardiovascular System Development and Function	development of vasculature	7.59e-25	Increased	2.67	CD40	CD40 molecule	Plasma Membrane	transmembrane receptor	9.69248e-05	8.01981e-06	up	2.53917	2.53917	1.34436	101
Cardiovascular System Development and Function	development of vasculature	7.59e-25	Increased	2.67	CDKN1A	cyclin-dependent kinase inhibitor 1A	Nucleus	kinase	0.000177018	2.76906e-05	up	2.34183	2.34183	1.22764	101
Cardiovascular System Development and Function	development of vasculature	7.59e-25	Increased	2.67	COL13A1	collagen type XIII alpha 1	Plasma Membrane	other	0.000438312	0.000152549	up	2.00617	2.00617	1.00444	101
Cardiovascular System Development and Function	development of vasculature	7.59e-25	Increased	2.67	CSF2	colony stimulating factor 2	Extracellular Space	cytokine	0.000181511	2.91396e-05	up	3.2134	3.2134	1.6841	101
Cardiovascular System Development and Function	development of vasculature	7.59e-25	Increased	2.67	CTSS	cathepsin S	Cytoplasm	peptidase	0.000531564	0.000215648	up	3.37352	3.37352	1.75426	101
Cardiovascular System Development and Function	development of vasculature	7.59e-25	Increased	2.67	CXCL1	C-X-C motif chemokine ligand 1	Extracellular Space	cytokine	7.2018e-05	3.46222e-06	up	2.66667	2.66667	1.41504	101
Cardiovascular System Development and Function	development of vasculature	7.59e-25	Increased	2.67	CXCL2	C-X-C motif chemokine ligand 2	Extracellular Space	cytokine	7.29755e-05	3.81133e-06	up	2.98142	2.98142	1.576	101
Cardiovascular System Development and Function	development of vasculature	7.59e-25	Increased	2.67	CXCL5	C-X-C motif chemokine ligand 5	Extracellular Space	cytokine	0.000517835	0.000205801	up	2.85352	2.85352	1.51274	101
Cardiovascular System Development and Function	development of vasculature	7.59e-25	Increased	2.67	CXCL8	C-X-C motif chemokine ligand 8	Extracellular Space	cytokine	4.70395e-05	7.41202e-07	up	6.01014	6.01014	2.5874	101
Cardiovascular System Development and Function	development of vasculature	7.59e-25	Increased	2.67	CYLD	CYLD lysine 63 deubiquitinase	Nucleus	transcription regulator	5.67199e-05	1.53037e-06	up	2.37536	2.37536	1.24815	101
Cardiovascular System Development and Function	development of vasculature	7.59e-25	Increased	2.67	ECE1	endothelin converting enzyme 1	Plasma Membrane	peptidase	0.000147862	1.93143e-05	up	2.01302	2.01302	1.00936	101
Cardiovascular System Development and Function	development of vasculature	7.59e-25	Increased	2.67	EGLN3	egl-9 family hypoxia-inducible factor 3	Cytoplasm	enzyme	0.000151048	1.99892e-05	down	2.79284	-2.79284	-1.48173	101
Cardiovascular System Development and Function	development of vasculature	7.59e-25	Increased	2.67	EGR1	early growth response 1	Nucleus	transcription regulator	0.000910266	0.000531525	down	2.02311	-2.02311	-1.01658	101
Cardiovascular System Development and Function	development of vasculature	7.59e-25	Increased	2.67	ELK3	ELK3, ETS transcription factor	Nucleus	transcription regulator	0.00024621	5.1675e-05	up	2.23868	2.23868	1.16265	101
Cardiovascular System Development and Function	development of vasculature	7.59e-25	Increased	2.67	EPHB1	EPH receptor B1	Plasma Membrane	kinase	0.0001348	1.60689e-05	up	2.30644	2.30644	1.20567	101
Cardiovascular System Development and Function	development of vasculature	7.59e-25	Increased	2.67	ETS1	ETS proto-oncogene 1, transcription factor	Nucleus	transcription regulator	0.000727446	0.000371116	up	2.14953	2.14953	1.10402	101
Cardiovascular System Development and Function	development of vasculature	7.59e-25	Increased	2.67	F3	coagulation factor III, tissue factor	Plasma Membrane	transmembrane receptor	0.000167293	2.45862e-05	up	2.83358	2.83358	1.50263	101
Cardiovascular System Development and Function	development of vasculature	7.59e-25	Increased	2.67	FGF1	fibroblast growth factor 1	Extracellular Space	growth factor	0.000689416	0.000339749	up	2.7327	2.7327	1.45033	101
Cardiovascular System Development and Function	development of vasculature	7.59e-25	Increased	2.67	FGF5	fibroblast growth factor 5	Extracellular Space	growth factor	3.65159e-05	2.83522e-07	up	3.22383	3.22383	1.68878	101
Cardiovascular System Development and Function	development of vasculature	7.59e-25	Increased	2.67	FGFR2	fibroblast growth factor receptor 2	Plasma Membrane	kinase	0.000292993	7.4204e-05	down	4.45302	-4.45302	-2.15478	101
Cardiovascular System Development and Function	development of vasculature	7.59e-25	Increased	2.67	FZD8	frizzled class receptor 8	Plasma Membrane	G-protein coupled receptor	0.000607384	0.000270472	up	2.43015	2.43015	1.28104	101
Cardiovascular System Development and Function	development of vasculature	7.59e-25	Increased	2.67	GAB1	GRB2 associated binding protein 1	Cytoplasm	kinase	0.000120758	1.28231e-05	down	2.38756	-2.38756	-1.25554	101
Cardiovascular System Development and Function	development of vasculature	7.59e-25	Increased	2.67	GEM	GTP binding protein overexpressed in skeletal muscle	Plasma Membrane	enzyme	0.000122297	1.31545e-05	up	2.14791	2.14791	1.10294	101
Cardiovascular System Development and Function	development of vasculature	7.59e-25	Increased	2.67	GJB2	gap junction protein beta 2	Plasma Membrane	transporter	4.21674e-05	4.2607e-07	up	2.38678	2.38678	1.25507	101
Cardiovascular System Development and Function	development of vasculature	7.59e-25	Increased	2.67	GPR180	G protein-coupled receptor 180	Cytoplasm	other	4.38315e-05	5.30485e-07	up	2.01282	2.01282	1.00922	101
Cardiovascular System Development and Function	development of vasculature	7.59e-25	Increased	2.67	HAS2	hyaluronan synthase 2	Plasma Membrane	enzyme	8.96643e-05	6.63704e-06	up	2.84304	2.84304	1.50743	101
Cardiovascular System Development and Function	development of vasculature	7.59e-25	Increased	2.67	HBEGF	heparin binding EGF like growth factor	Extracellular Space	growth factor	0.000324605	9.06211e-05	up	2.92802	2.92802	1.54993	101
Cardiovascular System Development and Function	development of vasculature	7.59e-25	Increased	2.67	HIPK2	homeodomain interacting protein kinase 2	Nucleus	kinase	4.76218e-05	8.20133e-07	down	3.90758	-3.90758	-1.96627	101
Cardiovascular System Development and Function	development of vasculature	7.59e-25	Increased	2.67	HMOX1	heme oxygenase 1	Cytoplasm	enzyme	3.07978e-05	1.0198e-07	up	7.17615	7.17615	2.84321	101
Cardiovascular System Development and Function	development of vasculature	7.59e-25	Increased	2.67	HOXA13	homeobox A13	Nucleus	transcription regulator	0.000455334	0.000163773	down	2.37492	-2.37492	-1.24788	101
Cardiovascular System Development and Function	development of vasculature	7.59e-25	Increased	2.67	ICAM1	intercellular adhesion molecule 1	Plasma Membrane	transmembrane receptor	4.25833e-05	4.82261e-07	up	4.88337	4.88337	2.28788	101
Cardiovascular System Development and Function	development of vasculature	7.59e-25	Increased	2.67	ID1	inhibitor of DNA binding 1, HLH protein	Nucleus	transcription regulator	6.27081e-05	2.40082e-06	down	2.32483	-2.32483	-1.21713	101
Cardiovascular System Development and Function	development of vasculature	7.59e-25	Increased	2.67	IGFBP3	insulin like growth factor binding protein 3	Extracellular Space	other	2.3646e-05	3.67681e-08	down	2.30432	-2.30432	-1.20434	101
Cardiovascular System Development and Function	development of vasculature	7.59e-25	Increased	2.67	IL6	interleukin 6	Extracellular Space	cytokine	3.65159e-05	2.68298e-07	up	2.78882	2.78882	1.47965	101
Cardiovascular System Development and Function	development of vasculature	7.59e-25	Increased	2.67	INHBA	inhibin beta A	Extracellular Space	growth factor	6.18657e-05	2.29577e-06	up	3.71771	3.71771	1.89441	101
Cardiovascular System Development and Function	development of vasculature	7.59e-25	Increased	2.67	ISM1	isthmin 1, angiogenesis inhibitor	Other	other	5.59787e-05	1.4284e-06	up	3.52491	3.52491	1.81758	101
Cardiovascular System Development and Function	development of vasculature	7.59e-25	Increased	2.67	ITGA2	integrin subunit alpha 2	Plasma Membrane	transmembrane receptor	0.000106124	9.61516e-06	up	4.46447	4.46447	2.15849	101
Cardiovascular System Development and Function	development of vasculature	7.59e-25	Increased	2.67	KITLG	KIT ligand	Extracellular Space	growth factor	3.70634e-05	2.92673e-07	down	2.80656	-2.80656	-1.4888	101
Cardiovascular System Development and Function	development of vasculature	7.59e-25	Increased	2.67	MIR17HG	miR-17-92a-1 cluster host gene	Other	other	0.000810491	0.000443466	down	2.15606	-2.15606	-1.1084	101
Cardiovascular System Development and Function	development of vasculature	7.59e-25	Increased	2.67	MMP1	matrix metallopeptidase 1	Extracellular Space	peptidase	2.99009e-05	6.82824e-08	up	3.68258	3.68258	1.88072	101
Cardiovascular System Development and Function	development of vasculature	7.59e-25	Increased	2.67	MMP14	matrix metallopeptidase 14	Extracellular Space	peptidase	5.71384e-05	1.58188e-06	up	2.21198	2.21198	1.14534	101
Cardiovascular System Development and Function	development of vasculature	7.59e-25	Increased	2.67	MMP7	matrix metallopeptidase 7	Extracellular Space	peptidase	0.000324617	9.07357e-05	down	4.18581	-4.18581	-2.06551	101
Cardiovascular System Development and Function	development of vasculature	7.59e-25	Increased	2.67	MMP9	matrix metallopeptidase 9	Extracellular Space	peptidase	0.000105861	9.4402e-06	up	5.58648	5.58648	2.48194	101
Cardiovascular System Development and Function	development of vasculature	7.59e-25	Increased	2.67	NRP2	neuropilin 2	Plasma Membrane	kinase	0.000805229	0.000439483	down	2.02262	-2.02262	-1.01622	101
Cardiovascular System Development and Function	development of vasculature	7.59e-25	Increased	2.67	PAPPA	pappalysin 1	Extracellular Space	peptidase	0.000596275	0.000262189	up	2.6645	2.6645	1.41387	101
Cardiovascular System Development and Function	development of vasculature	7.59e-25	Increased	2.67	PCSK5	proprotein convertase subtilisin/kexin type 5	Extracellular Space	peptidase	6.83344e-05	2.83433e-06	down	2.0834	-2.0834	-1.05894	101
Cardiovascular System Development and Function	development of vasculature	7.59e-25	Increased	2.67	PDZK1	PDZ domain containing 1	Plasma Membrane	transporter	3.59123e-05	1.64283e-07	down	4.64588	-4.64588	-2.21595	101
Cardiovascular System Development and Function	development of vasculature	7.59e-25	Increased	2.67	PLA2G4A	phospholipase A2 group IVA	Cytoplasm	enzyme	0.000319621	8.78429e-05	up	2.0774	2.0774	1.05478	101
Cardiovascular System Development and Function	development of vasculature	7.59e-25	Increased	2.67	PLAT	plasminogen activator, tissue type	Extracellular Space	peptidase	0.000324331	9.0357e-05	up	2.93037	2.93037	1.55108	101
Cardiovascular System Development and Function	development of vasculature	7.59e-25	Increased	2.67	PLAU	plasminogen activator, urokinase	Extracellular Space	peptidase	7.29755e-05	3.74487e-06	up	4.08751	4.08751	2.03122	101
Cardiovascular System Development and Function	development of vasculature	7.59e-25	Increased	2.67	PLAUR	plasminogen activator, urokinase receptor	Plasma Membrane	transmembrane receptor	5.72628e-05	1.70817e-06	up	3.57375	3.57375	1.83744	101
Cardiovascular System Development and Function	development of vasculature	7.59e-25	Increased	2.67	PPIA	peptidylprolyl isomerase A	Cytoplasm	enzyme	0.000213482	3.91661e-05	down	3.11421	-3.11421	-1.63887	101
Cardiovascular System Development and Function	development of vasculature	7.59e-25	Increased	2.67	PRKAA1	protein kinase AMP-activated catalytic subunit alpha 1	Cytoplasm	kinase	0.00048552	0.000183941	down	2.44451	-2.44451	-1.28954	101
Cardiovascular System Development and Function	development of vasculature	7.59e-25	Increased	2.67	PROCR	protein C receptor	Plasma Membrane	other	4.80549e-05	8.55968e-07	down	2.18783	-2.18783	-1.1295	101
Cardiovascular System Development and Function	development of vasculature	7.59e-25	Increased	2.67	PTGER2	prostaglandin E receptor 2	Plasma Membrane	G-protein coupled receptor	0.000252601	5.47139e-05	down	2.17697	-2.17697	-1.12232	101
Cardiovascular System Development and Function	development of vasculature	7.59e-25	Increased	2.67	PTGIS	prostaglandin I2 (prostacyclin) synthase	Cytoplasm	enzyme	0.00012705	1.42352e-05	down	2.49963	-2.49963	-1.32171	101
Cardiovascular System Development and Function	development of vasculature	7.59e-25	Increased	2.67	PTGS1	prostaglandin-endoperoxide synthase 1	Cytoplasm	enzyme	0.000467757	0.000172084	up	2.1589	2.1589	1.1103	101
Cardiovascular System Development and Function	development of vasculature	7.59e-25	Increased	2.67	PTX3	pentraxin 3	Extracellular Space	other	0.000292993	7.42705e-05	up	3.61367	3.61367	1.85347	101
Cardiovascular System Development and Function	development of vasculature	7.59e-25	Increased	2.67	RAP1A	RAP1A, member of RAS oncogene family	Cytoplasm	enzyme	5.67199e-05	1.48871e-06	up	2.16819	2.16819	1.11649	101
Cardiovascular System Development and Function	development of vasculature	7.59e-25	Increased	2.67	RASA3	RAS p21 protein activator 3	Plasma Membrane	ion channel	8.48538e-05	5.86167e-06	up	2.52339	2.52339	1.33536	101
Cardiovascular System Development and Function	development of vasculature	7.59e-25	Increased	2.67	RCAN1	regulator of calcineurin 1	Nucleus	transcription regulator	7.03519e-05	3.19708e-06	up	2.17179	2.17179	1.11888	101
Cardiovascular System Development and Function	development of vasculature	7.59e-25	Increased	2.67	RGS4	regulator of G-protein signaling 4	Cytoplasm	other	4.9534e-05	9.97018e-07	up	2.89909	2.89909	1.5356	101
Cardiovascular System Development and Function	development of vasculature	7.59e-25	Increased	2.67	RHOB	ras homolog family member B	Cytoplasm	enzyme	6.81397e-05	2.79312e-06	down	3.93244	-3.93244	-1.97543	101
Cardiovascular System Development and Function	development of vasculature	7.59e-25	Increased	2.67	ROBO4	roundabout guidance receptor 4	Plasma Membrane	other	0.00240454	0.0019518	up	4.75767	4.75767	2.25026	101
Cardiovascular System Development and Function	development of vasculature	7.59e-25	Increased	2.67	RPSA	ribosomal protein SA	Cytoplasm	translation regulator	4.9534e-05	1.00921e-06	up	4.16121	4.16121	2.057	101
Cardiovascular System Development and Function	development of vasculature	7.59e-25	Increased	2.67	S1PR1	sphingosine-1-phosphate receptor 1	Plasma Membrane	G-protein coupled receptor	1.48349e-06	3.38774e-10	down	7.79723	-7.79723	-2.96296	101
Cardiovascular System Development and Function	development of vasculature	7.59e-25	Increased	2.67	SAA1	serum amyloid A1	Extracellular Space	transporter	7.47863e-05	4.10752e-06	up	2.96712	2.96712	1.56907	101
Cardiovascular System Development and Function	development of vasculature	7.59e-25	Increased	2.67	SEMA3A	semaphorin 3A	Extracellular Space	other	0.000519394	0.000207155	up	2.7446	2.7446	1.4566	101
Cardiovascular System Development and Function	development of vasculature	7.59e-25	Increased	2.67	SEMA3C	semaphorin 3C	Extracellular Space	other	7.89682e-05	4.88712e-06	up	2.25702	2.25702	1.17442	101
Cardiovascular System Development and Function	development of vasculature	7.59e-25	Increased	2.67	SEMA6A	semaphorin 6A	Plasma Membrane	transmembrane receptor	0.000689694	0.000340277	down	2.06704	-2.06704	-1.04756	101
Cardiovascular System Development and Function	development of vasculature	7.59e-25	Increased	2.67	SERPIND1	serpin family D member 1	Extracellular Space	other	0.000730228	0.000373821	up	2.96837	2.96837	1.56967	101
Cardiovascular System Development and Function	development of vasculature	7.59e-25	Increased	2.67	SNAP25	synaptosome associated protein 25kDa	Plasma Membrane	transporter	0.000114304	1.12265e-05	down	2.84358	-2.84358	-1.50771	101
Cardiovascular System Development and Function	development of vasculature	7.59e-25	Increased	2.67	SP100	SP100 nuclear antigen	Nucleus	transcription regulator	0.000850382	0.00047736	up	2.11249	2.11249	1.07894	101
Cardiovascular System Development and Function	development of vasculature	7.59e-25	Increased	2.67	SPRY2	sprouty RTK signaling antagonist 2	Plasma Membrane	other	0.000410306	0.000136093	up	2.82721	2.82721	1.49938	101
Cardiovascular System Development and Function	development of vasculature	7.59e-25	Increased	2.67	SRGN	serglycin	Cytoplasm	other	0.000152117	2.0184e-05	up	2.12857	2.12857	1.08989	101
Cardiovascular System Development and Function	development of vasculature	7.59e-25	Increased	2.67	STAT1	signal transducer and activator of transcription 1	Nucleus	transcription regulator	0.000127302	1.44319e-05	down	2.48387	-2.48387	-1.31259	101
Cardiovascular System Development and Function	development of vasculature	7.59e-25	Increased	2.67	STC1	stanniocalcin 1	Extracellular Space	kinase	0.000278723	6.72781e-05	up	2.19527	2.19527	1.1344	101
Cardiovascular System Development and Function	development of vasculature	7.59e-25	Increased	2.67	TAB2	TGF-beta activated kinase 1/MAP3K7 binding protein 2	Cytoplasm	other	7.07354e-05	3.22612e-06	down	2.16795	-2.16795	-1.11633	101
Cardiovascular System Development and Function	development of vasculature	7.59e-25	Increased	2.67	THBD	thrombomodulin	Plasma Membrane	transmembrane receptor	8.17504e-05	5.46994e-06	up	3.21574	3.21574	1.68515	101
Cardiovascular System Development and Function	development of vasculature	7.59e-25	Increased	2.67	TLR2	toll like receptor 2	Plasma Membrane	transmembrane receptor	8.09449e-05	5.23963e-06	up	4.16405	4.16405	2.05799	101
Cardiovascular System Development and Function	development of vasculature	7.59e-25	Increased	2.67	TNF	tumor necrosis factor	Extracellular Space	cytokine	0.000291147	7.31026e-05	up	2.74571	2.74571	1.45718	101
Cardiovascular System Development and Function	development of vasculature	7.59e-25	Increased	2.67	TNFAIP3	TNF alpha induced protein 3	Nucleus	enzyme	4.63841e-05	6.73483e-07	up	3.2656	3.2656	1.70735	101
Cardiovascular System Development and Function	development of vasculature	7.59e-25	Increased	2.67	TSPAN12	tetraspanin 12	Plasma Membrane	other	0.000254085	5.55272e-05	down	2.6916	-2.6916	-1.42846	101
Cardiovascular System Development and Function	development of vasculature	7.59e-25	Increased	2.67	VAV3	vav guanine nucleotide exchange factor 3	Extracellular Space	cytokine	9.63321e-05	7.8327e-06	down	8.02289	-8.02289	-3.00412	101
Cardiovascular System Development and Function	development of vasculature	7.59e-25	Increased	2.67	VDR	vitamin D (1,25- dihydroxyvitamin D3) receptor	Nucleus	transcription regulator	0.000664155	0.000317745	up	3.17167	3.17167	1.66524	101
Cardiovascular System Development and Function	development of vasculature	7.59e-25	Increased	2.67	VEGFC	vascular endothelial growth factor C	Extracellular Space	growth factor	4.25833e-05	4.70028e-07	up	2.6596	2.6596	1.41121	101
Cardiovascular System Development and Function	development of vasculature	7.59e-25	Increased	2.67	VEZF1	vascular endothelial zinc finger 1	Nucleus	transcription regulator	0.000350557	0.000102189	down	3.01663	-3.01663	-1.59294	101
Cardiovascular System Development and Function	development of vasculature	7.59e-25	Increased	2.67	WNT5A	Wnt family member 5A	Extracellular Space	cytokine	9.09658e-05	6.84293e-06	up	3.07702	3.07702	1.62154	101
Cardiovascular System Development and Function	development of vasculature	7.59e-25	Increased	2.67	XDH	xanthine dehydrogenase	Cytoplasm	enzyme	0.000240351	4.90388e-05	up	2.04405	2.04405	1.03143	101
Cardiovascular System Development and Function, Organismal Development	angiogenesis	1.53e-24	Increased	2.67	ADORA2B	adenosine A2b receptor	Plasma Membrane	G-protein coupled receptor	0.000155574	2.11387e-05	up	2.26916	2.26916	1.18216	93
Cardiovascular System Development and Function, Organismal Development	angiogenesis	1.53e-24	Increased	2.67	AIMP1	aminoacyl tRNA synthetase complex-interacting multifunctional protein 1	Extracellular Space	cytokine	0.00061013	0.000272183	down	2.17524	-2.17524	-1.12117	93
Cardiovascular System Development and Function, Organismal Development	angiogenesis	1.53e-24	Increased	2.67	ARHGAP22	Rho GTPase activating protein 22	Cytoplasm	other	4.21995e-05	4.57747e-07	up	2.59293	2.59293	1.37458	93
Cardiovascular System Development and Function, Organismal Development	angiogenesis	1.53e-24	Increased	2.67	BMPER	BMP binding endothelial regulator	Extracellular Space	other	0.000275311	6.53595e-05	up	4.43084	4.43084	2.14758	93
Cardiovascular System Development and Function, Organismal Development	angiogenesis	1.53e-24	Increased	2.67	C3	complement component 3	Extracellular Space	peptidase	0.000166276	2.38974e-05	up	3.15758	3.15758	1.65882	93
Cardiovascular System Development and Function, Organismal Development	angiogenesis	1.53e-24	Increased	2.67	CAV2	caveolin 2	Plasma Membrane	other	0.000299487	7.77613e-05	down	2.2358	-2.2358	-1.16079	93
Cardiovascular System Development and Function, Organismal Development	angiogenesis	1.53e-24	Increased	2.67	CCL2	C-C motif chemokine ligand 2	Extracellular Space	cytokine	5.71384e-05	1.64325e-06	up	4.18932	4.18932	2.06672	93
Cardiovascular System Development and Function, Organismal Development	angiogenesis	1.53e-24	Increased	2.67	CCL5	C-C motif chemokine ligand 5	Extracellular Space	cytokine	0.000244253	5.08419e-05	up	3.69923	3.69923	1.88723	93
Cardiovascular System Development and Function, Organismal Development	angiogenesis	1.53e-24	Increased	2.67	CD40	CD40 molecule	Plasma Membrane	transmembrane receptor	9.69248e-05	8.01981e-06	up	2.53917	2.53917	1.34436	93
Cardiovascular System Development and Function, Organismal Development	angiogenesis	1.53e-24	Increased	2.67	CDKN1A	cyclin-dependent kinase inhibitor 1A	Nucleus	kinase	0.000177018	2.76906e-05	up	2.34183	2.34183	1.22764	93
Cardiovascular System Development and Function, Organismal Development	angiogenesis	1.53e-24	Increased	2.67	COL13A1	collagen type XIII alpha 1	Plasma Membrane	other	0.000438312	0.000152549	up	2.00617	2.00617	1.00444	93
Cardiovascular System Development and Function, Organismal Development	angiogenesis	1.53e-24	Increased	2.67	CSF2	colony stimulating factor 2	Extracellular Space	cytokine	0.000181511	2.91396e-05	up	3.2134	3.2134	1.6841	93
Cardiovascular System Development and Function, Organismal Development	angiogenesis	1.53e-24	Increased	2.67	CTSS	cathepsin S	Cytoplasm	peptidase	0.000531564	0.000215648	up	3.37352	3.37352	1.75426	93
Cardiovascular System Development and Function, Organismal Development	angiogenesis	1.53e-24	Increased	2.67	CXCL1	C-X-C motif chemokine ligand 1	Extracellular Space	cytokine	7.2018e-05	3.46222e-06	up	2.66667	2.66667	1.41504	93
Cardiovascular System Development and Function, Organismal Development	angiogenesis	1.53e-24	Increased	2.67	CXCL2	C-X-C motif chemokine ligand 2	Extracellular Space	cytokine	7.29755e-05	3.81133e-06	up	2.98142	2.98142	1.576	93
Cardiovascular System Development and Function, Organismal Development	angiogenesis	1.53e-24	Increased	2.67	CXCL5	C-X-C motif chemokine ligand 5	Extracellular Space	cytokine	0.000517835	0.000205801	up	2.85352	2.85352	1.51274	93
Cardiovascular System Development and Function, Organismal Development	angiogenesis	1.53e-24	Increased	2.67	CXCL8	C-X-C motif chemokine ligand 8	Extracellular Space	cytokine	4.70395e-05	7.41202e-07	up	6.01014	6.01014	2.5874	93
Cardiovascular System Development and Function, Organismal Development	angiogenesis	1.53e-24	Increased	2.67	CYLD	CYLD lysine 63 deubiquitinase	Nucleus	transcription regulator	5.67199e-05	1.53037e-06	up	2.37536	2.37536	1.24815	93
Cardiovascular System Development and Function, Organismal Development	angiogenesis	1.53e-24	Increased	2.67	ECE1	endothelin converting enzyme 1	Plasma Membrane	peptidase	0.000147862	1.93143e-05	up	2.01302	2.01302	1.00936	93
Cardiovascular System Development and Function, Organismal Development	angiogenesis	1.53e-24	Increased	2.67	EGLN3	egl-9 family hypoxia-inducible factor 3	Cytoplasm	enzyme	0.000151048	1.99892e-05	down	2.79284	-2.79284	-1.48173	93
Cardiovascular System Development and Function, Organismal Development	angiogenesis	1.53e-24	Increased	2.67	EGR1	early growth response 1	Nucleus	transcription regulator	0.000910266	0.000531525	down	2.02311	-2.02311	-1.01658	93
Cardiovascular System Development and Function, Organismal Development	angiogenesis	1.53e-24	Increased	2.67	ELK3	ELK3, ETS transcription factor	Nucleus	transcription regulator	0.00024621	5.1675e-05	up	2.23868	2.23868	1.16265	93
Cardiovascular System Development and Function, Organismal Development	angiogenesis	1.53e-24	Increased	2.67	EPHB1	EPH receptor B1	Plasma Membrane	kinase	0.0001348	1.60689e-05	up	2.30644	2.30644	1.20567	93
Cardiovascular System Development and Function, Organismal Development	angiogenesis	1.53e-24	Increased	2.67	ETS1	ETS proto-oncogene 1, transcription factor	Nucleus	transcription regulator	0.000727446	0.000371116	up	2.14953	2.14953	1.10402	93
Cardiovascular System Development and Function, Organismal Development	angiogenesis	1.53e-24	Increased	2.67	F3	coagulation factor III, tissue factor	Plasma Membrane	transmembrane receptor	0.000167293	2.45862e-05	up	2.83358	2.83358	1.50263	93
Cardiovascular System Development and Function, Organismal Development	angiogenesis	1.53e-24	Increased	2.67	FGF1	fibroblast growth factor 1	Extracellular Space	growth factor	0.000689416	0.000339749	up	2.7327	2.7327	1.45033	93
Cardiovascular System Development and Function, Organismal Development	angiogenesis	1.53e-24	Increased	2.67	FGF5	fibroblast growth factor 5	Extracellular Space	growth factor	3.65159e-05	2.83522e-07	up	3.22383	3.22383	1.68878	93
Cardiovascular System Development and Function, Organismal Development	angiogenesis	1.53e-24	Increased	2.67	FGFR2	fibroblast growth factor receptor 2	Plasma Membrane	kinase	0.000292993	7.4204e-05	down	4.45302	-4.45302	-2.15478	93
Cardiovascular System Development and Function, Organismal Development	angiogenesis	1.53e-24	Increased	2.67	FZD8	frizzled class receptor 8	Plasma Membrane	G-protein coupled receptor	0.000607384	0.000270472	up	2.43015	2.43015	1.28104	93
Cardiovascular System Development and Function, Organismal Development	angiogenesis	1.53e-24	Increased	2.67	GAB1	GRB2 associated binding protein 1	Cytoplasm	kinase	0.000120758	1.28231e-05	down	2.38756	-2.38756	-1.25554	93
Cardiovascular System Development and Function, Organismal Development	angiogenesis	1.53e-24	Increased	2.67	GEM	GTP binding protein overexpressed in skeletal muscle	Plasma Membrane	enzyme	0.000122297	1.31545e-05	up	2.14791	2.14791	1.10294	93
Cardiovascular System Development and Function, Organismal Development	angiogenesis	1.53e-24	Increased	2.67	HAS2	hyaluronan synthase 2	Plasma Membrane	enzyme	8.96643e-05	6.63704e-06	up	2.84304	2.84304	1.50743	93
Cardiovascular System Development and Function, Organismal Development	angiogenesis	1.53e-24	Increased	2.67	HBEGF	heparin binding EGF like growth factor	Extracellular Space	growth factor	0.000324605	9.06211e-05	up	2.92802	2.92802	1.54993	93
Cardiovascular System Development and Function, Organismal Development	angiogenesis	1.53e-24	Increased	2.67	HIPK2	homeodomain interacting protein kinase 2	Nucleus	kinase	4.76218e-05	8.20133e-07	down	3.90758	-3.90758	-1.96627	93
Cardiovascular System Development and Function, Organismal Development	angiogenesis	1.53e-24	Increased	2.67	HMOX1	heme oxygenase 1	Cytoplasm	enzyme	3.07978e-05	1.0198e-07	up	7.17615	7.17615	2.84321	93
Cardiovascular System Development and Function, Organismal Development	angiogenesis	1.53e-24	Increased	2.67	HOXA13	homeobox A13	Nucleus	transcription regulator	0.000455334	0.000163773	down	2.37492	-2.37492	-1.24788	93
Cardiovascular System Development and Function, Organismal Development	angiogenesis	1.53e-24	Increased	2.67	ICAM1	intercellular adhesion molecule 1	Plasma Membrane	transmembrane receptor	4.25833e-05	4.82261e-07	up	4.88337	4.88337	2.28788	93
Cardiovascular System Development and Function, Organismal Development	angiogenesis	1.53e-24	Increased	2.67	ID1	inhibitor of DNA binding 1, HLH protein	Nucleus	transcription regulator	6.27081e-05	2.40082e-06	down	2.32483	-2.32483	-1.21713	93
Cardiovascular System Development and Function, Organismal Development	angiogenesis	1.53e-24	Increased	2.67	IGFBP3	insulin like growth factor binding protein 3	Extracellular Space	other	2.3646e-05	3.67681e-08	down	2.30432	-2.30432	-1.20434	93
Cardiovascular System Development and Function, Organismal Development	angiogenesis	1.53e-24	Increased	2.67	IL6	interleukin 6	Extracellular Space	cytokine	3.65159e-05	2.68298e-07	up	2.78882	2.78882	1.47965	93
Cardiovascular System Development and Function, Organismal Development	angiogenesis	1.53e-24	Increased	2.67	INHBA	inhibin beta A	Extracellular Space	growth factor	6.18657e-05	2.29577e-06	up	3.71771	3.71771	1.89441	93
Cardiovascular System Development and Function, Organismal Development	angiogenesis	1.53e-24	Increased	2.67	ISM1	isthmin 1, angiogenesis inhibitor	Other	other	5.59787e-05	1.4284e-06	up	3.52491	3.52491	1.81758	93
Cardiovascular System Development and Function, Organismal Development	angiogenesis	1.53e-24	Increased	2.67	ITGA2	integrin subunit alpha 2	Plasma Membrane	transmembrane receptor	0.000106124	9.61516e-06	up	4.46447	4.46447	2.15849	93
Cardiovascular System Development and Function, Organismal Development	angiogenesis	1.53e-24	Increased	2.67	KITLG	KIT ligand	Extracellular Space	growth factor	3.70634e-05	2.92673e-07	down	2.80656	-2.80656	-1.4888	93
Cardiovascular System Development and Function, Organismal Development	angiogenesis	1.53e-24	Increased	2.67	MIR17HG	miR-17-92a-1 cluster host gene	Other	other	0.000810491	0.000443466	down	2.15606	-2.15606	-1.1084	93
Cardiovascular System Development and Function, Organismal Development	angiogenesis	1.53e-24	Increased	2.67	MMP1	matrix metallopeptidase 1	Extracellular Space	peptidase	2.99009e-05	6.82824e-08	up	3.68258	3.68258	1.88072	93
Cardiovascular System Development and Function, Organismal Development	angiogenesis	1.53e-24	Increased	2.67	MMP14	matrix metallopeptidase 14	Extracellular Space	peptidase	5.71384e-05	1.58188e-06	up	2.21198	2.21198	1.14534	93
Cardiovascular System Development and Function, Organismal Development	angiogenesis	1.53e-24	Increased	2.67	MMP7	matrix metallopeptidase 7	Extracellular Space	peptidase	0.000324617	9.07357e-05	down	4.18581	-4.18581	-2.06551	93
Cardiovascular System Development and Function, Organismal Development	angiogenesis	1.53e-24	Increased	2.67	MMP9	matrix metallopeptidase 9	Extracellular Space	peptidase	0.000105861	9.4402e-06	up	5.58648	5.58648	2.48194	93
Cardiovascular System Development and Function, Organismal Development	angiogenesis	1.53e-24	Increased	2.67	NRP2	neuropilin 2	Plasma Membrane	kinase	0.000805229	0.000439483	down	2.02262	-2.02262	-1.01622	93
Cardiovascular System Development and Function, Organismal Development	angiogenesis	1.53e-24	Increased	2.67	PAPPA	pappalysin 1	Extracellular Space	peptidase	0.000596275	0.000262189	up	2.6645	2.6645	1.41387	93
Cardiovascular System Development and Function, Organismal Development	angiogenesis	1.53e-24	Increased	2.67	PCSK5	proprotein convertase subtilisin/kexin type 5	Extracellular Space	peptidase	6.83344e-05	2.83433e-06	down	2.0834	-2.0834	-1.05894	93
Cardiovascular System Development and Function, Organismal Development	angiogenesis	1.53e-24	Increased	2.67	PDZK1	PDZ domain containing 1	Plasma Membrane	transporter	3.59123e-05	1.64283e-07	down	4.64588	-4.64588	-2.21595	93
Cardiovascular System Development and Function, Organismal Development	angiogenesis	1.53e-24	Increased	2.67	PLA2G4A	phospholipase A2 group IVA	Cytoplasm	enzyme	0.000319621	8.78429e-05	up	2.0774	2.0774	1.05478	93
Cardiovascular System Development and Function, Organismal Development	angiogenesis	1.53e-24	Increased	2.67	PLAT	plasminogen activator, tissue type	Extracellular Space	peptidase	0.000324331	9.0357e-05	up	2.93037	2.93037	1.55108	93
Cardiovascular System Development and Function, Organismal Development	angiogenesis	1.53e-24	Increased	2.67	PLAU	plasminogen activator, urokinase	Extracellular Space	peptidase	7.29755e-05	3.74487e-06	up	4.08751	4.08751	2.03122	93
Cardiovascular System Development and Function, Organismal Development	angiogenesis	1.53e-24	Increased	2.67	PLAUR	plasminogen activator, urokinase receptor	Plasma Membrane	transmembrane receptor	5.72628e-05	1.70817e-06	up	3.57375	3.57375	1.83744	93
Cardiovascular System Development and Function, Organismal Development	angiogenesis	1.53e-24	Increased	2.67	PPIA	peptidylprolyl isomerase A	Cytoplasm	enzyme	0.000213482	3.91661e-05	down	3.11421	-3.11421	-1.63887	93
Cardiovascular System Development and Function, Organismal Development	angiogenesis	1.53e-24	Increased	2.67	PRKAA1	protein kinase AMP-activated catalytic subunit alpha 1	Cytoplasm	kinase	0.00048552	0.000183941	down	2.44451	-2.44451	-1.28954	93
Cardiovascular System Development and Function, Organismal Development	angiogenesis	1.53e-24	Increased	2.67	PROCR	protein C receptor	Plasma Membrane	other	4.80549e-05	8.55968e-07	down	2.18783	-2.18783	-1.1295	93
Cardiovascular System Development and Function, Organismal Development	angiogenesis	1.53e-24	Increased	2.67	PTGER2	prostaglandin E receptor 2	Plasma Membrane	G-protein coupled receptor	0.000252601	5.47139e-05	down	2.17697	-2.17697	-1.12232	93
Cardiovascular System Development and Function, Organismal Development	angiogenesis	1.53e-24	Increased	2.67	PTGIS	prostaglandin I2 (prostacyclin) synthase	Cytoplasm	enzyme	0.00012705	1.42352e-05	down	2.49963	-2.49963	-1.32171	93
Cardiovascular System Development and Function, Organismal Development	angiogenesis	1.53e-24	Increased	2.67	PTGS1	prostaglandin-endoperoxide synthase 1	Cytoplasm	enzyme	0.000467757	0.000172084	up	2.1589	2.1589	1.1103	93
Cardiovascular System Development and Function, Organismal Development	angiogenesis	1.53e-24	Increased	2.67	PTX3	pentraxin 3	Extracellular Space	other	0.000292993	7.42705e-05	up	3.61367	3.61367	1.85347	93
Cardiovascular System Development and Function, Organismal Development	angiogenesis	1.53e-24	Increased	2.67	RAP1A	RAP1A, member of RAS oncogene family	Cytoplasm	enzyme	5.67199e-05	1.48871e-06	up	2.16819	2.16819	1.11649	93
Cardiovascular System Development and Function, Organismal Development	angiogenesis	1.53e-24	Increased	2.67	RASA3	RAS p21 protein activator 3	Plasma Membrane	ion channel	8.48538e-05	5.86167e-06	up	2.52339	2.52339	1.33536	93
Cardiovascular System Development and Function, Organismal Development	angiogenesis	1.53e-24	Increased	2.67	RCAN1	regulator of calcineurin 1	Nucleus	transcription regulator	7.03519e-05	3.19708e-06	up	2.17179	2.17179	1.11888	93
Cardiovascular System Development and Function, Organismal Development	angiogenesis	1.53e-24	Increased	2.67	RGS4	regulator of G-protein signaling 4	Cytoplasm	other	4.9534e-05	9.97018e-07	up	2.89909	2.89909	1.5356	93
Cardiovascular System Development and Function, Organismal Development	angiogenesis	1.53e-24	Increased	2.67	RHOB	ras homolog family member B	Cytoplasm	enzyme	6.81397e-05	2.79312e-06	down	3.93244	-3.93244	-1.97543	93
Cardiovascular System Development and Function, Organismal Development	angiogenesis	1.53e-24	Increased	2.67	ROBO4	roundabout guidance receptor 4	Plasma Membrane	other	0.00240454	0.0019518	up	4.75767	4.75767	2.25026	93
Cardiovascular System Development and Function, Organismal Development	angiogenesis	1.53e-24	Increased	2.67	RPSA	ribosomal protein SA	Cytoplasm	translation regulator	4.9534e-05	1.00921e-06	up	4.16121	4.16121	2.057	93
Cardiovascular System Development and Function, Organismal Development	angiogenesis	1.53e-24	Increased	2.67	S1PR1	sphingosine-1-phosphate receptor 1	Plasma Membrane	G-protein coupled receptor	1.48349e-06	3.38774e-10	down	7.79723	-7.79723	-2.96296	93
Cardiovascular System Development and Function, Organismal Development	angiogenesis	1.53e-24	Increased	2.67	SAA1	serum amyloid A1	Extracellular Space	transporter	7.47863e-05	4.10752e-06	up	2.96712	2.96712	1.56907	93
Cardiovascular System Development and Function, Organismal Development	angiogenesis	1.53e-24	Increased	2.67	SEMA3A	semaphorin 3A	Extracellular Space	other	0.000519394	0.000207155	up	2.7446	2.7446	1.4566	93
Cardiovascular System Development and Function, Organismal Development	angiogenesis	1.53e-24	Increased	2.67	SEMA3C	semaphorin 3C	Extracellular Space	other	7.89682e-05	4.88712e-06	up	2.25702	2.25702	1.17442	93
Cardiovascular System Development and Function, Organismal Development	angiogenesis	1.53e-24	Increased	2.67	SEMA6A	semaphorin 6A	Plasma Membrane	transmembrane receptor	0.000689694	0.000340277	down	2.06704	-2.06704	-1.04756	93
Cardiovascular System Development and Function, Organismal Development	angiogenesis	1.53e-24	Increased	2.67	SERPIND1	serpin family D member 1	Extracellular Space	other	0.000730228	0.000373821	up	2.96837	2.96837	1.56967	93
Cardiovascular System Development and Function, Organismal Development	angiogenesis	1.53e-24	Increased	2.67	SP100	SP100 nuclear antigen	Nucleus	transcription regulator	0.000850382	0.00047736	up	2.11249	2.11249	1.07894	93
Cardiovascular System Development and Function, Organismal Development	angiogenesis	1.53e-24	Increased	2.67	SPRY2	sprouty RTK signaling antagonist 2	Plasma Membrane	other	0.000410306	0.000136093	up	2.82721	2.82721	1.49938	93
Cardiovascular System Development and Function, Organismal Development	angiogenesis	1.53e-24	Increased	2.67	SRGN	serglycin	Cytoplasm	other	0.000152117	2.0184e-05	up	2.12857	2.12857	1.08989	93
Cardiovascular System Development and Function, Organismal Development	angiogenesis	1.53e-24	Increased	2.67	STAT1	signal transducer and activator of transcription 1	Nucleus	transcription regulator	0.000127302	1.44319e-05	down	2.48387	-2.48387	-1.31259	93
Cardiovascular System Development and Function, Organismal Development	angiogenesis	1.53e-24	Increased	2.67	STC1	stanniocalcin 1	Extracellular Space	kinase	0.000278723	6.72781e-05	up	2.19527	2.19527	1.1344	93
Cardiovascular System Development and Function, Organismal Development	angiogenesis	1.53e-24	Increased	2.67	TAB2	TGF-beta activated kinase 1/MAP3K7 binding protein 2	Cytoplasm	other	7.07354e-05	3.22612e-06	down	2.16795	-2.16795	-1.11633	93
Cardiovascular System Development and Function, Organismal Development	angiogenesis	1.53e-24	Increased	2.67	THBD	thrombomodulin	Plasma Membrane	transmembrane receptor	8.17504e-05	5.46994e-06	up	3.21574	3.21574	1.68515	93
Cardiovascular System Development and Function, Organismal Development	angiogenesis	1.53e-24	Increased	2.67	TLR2	toll like receptor 2	Plasma Membrane	transmembrane receptor	8.09449e-05	5.23963e-06	up	4.16405	4.16405	2.05799	93
Cardiovascular System Development and Function, Organismal Development	angiogenesis	1.53e-24	Increased	2.67	TNF	tumor necrosis factor	Extracellular Space	cytokine	0.000291147	7.31026e-05	up	2.74571	2.74571	1.45718	93
Cardiovascular System Development and Function, Organismal Development	angiogenesis	1.53e-24	Increased	2.67	TNFAIP3	TNF alpha induced protein 3	Nucleus	enzyme	4.63841e-05	6.73483e-07	up	3.2656	3.2656	1.70735	93
Cardiovascular System Development and Function, Organismal Development	angiogenesis	1.53e-24	Increased	2.67	TSPAN12	tetraspanin 12	Plasma Membrane	other	0.000254085	5.55272e-05	down	2.6916	-2.6916	-1.42846	93
Cardiovascular System Development and Function, Organismal Development	angiogenesis	1.53e-24	Increased	2.67	VAV3	vav guanine nucleotide exchange factor 3	Extracellular Space	cytokine	9.63321e-05	7.8327e-06	down	8.02289	-8.02289	-3.00412	93
Cardiovascular System Development and Function, Organismal Development	angiogenesis	1.53e-24	Increased	2.67	VEGFC	vascular endothelial growth factor C	Extracellular Space	growth factor	4.25833e-05	4.70028e-07	up	2.6596	2.6596	1.41121	93
Cardiovascular System Development and Function, Organismal Development	angiogenesis	1.53e-24	Increased	2.67	VEZF1	vascular endothelial zinc finger 1	Nucleus	transcription regulator	0.000350557	0.000102189	down	3.01663	-3.01663	-1.59294	93
Cardiovascular System Development and Function, Organismal Development	angiogenesis	1.53e-24	Increased	2.67	WNT5A	Wnt family member 5A	Extracellular Space	cytokine	9.09658e-05	6.84293e-06	up	3.07702	3.07702	1.62154	93
Cardiovascular System Development and Function, Organismal Development	angiogenesis	1.53e-24	Increased	2.67	XDH	xanthine dehydrogenase	Cytoplasm	enzyme	0.000240351	4.90388e-05	up	2.04405	2.04405	1.03143	93
Cellular Movement	migration of cells	1.52e-23	Increased	2.992	ABHD2	abhydrolase domain containing 2	Other	enzyme	4.9534e-05	1.01467e-06	down	2.64079	-2.64079	-1.40097	143
Cellular Movement	migration of cells	1.52e-23	Increased	2.992	ACKR3	atypical chemokine receptor 3	Plasma Membrane	G-protein coupled receptor	0.00018251	2.96362e-05	up	2.02777	2.02777	1.0199	143
Cellular Movement	migration of cells	1.52e-23	Increased	2.992	ADORA2B	adenosine A2b receptor	Plasma Membrane	G-protein coupled receptor	0.000155574	2.11387e-05	up	2.26916	2.26916	1.18216	143
Cellular Movement	migration of cells	1.52e-23	Increased	2.992	AIMP1	aminoacyl tRNA synthetase complex-interacting multifunctional protein 1	Extracellular Space	cytokine	0.00061013	0.000272183	down	2.17524	-2.17524	-1.12117	143
Cellular Movement	migration of cells	1.52e-23	Increased	2.992	ALOX5AP	arachidonate 5-lipoxygenase activating protein	Plasma Membrane	other	0.000451005	0.00016139	up	2.27085	2.27085	1.18323	143
Cellular Movement	migration of cells	1.52e-23	Increased	2.992	AREG	amphiregulin	Extracellular Space	growth factor	0.00030687	8.06945e-05	up	2.63063	2.63063	1.39541	143
Cellular Movement	migration of cells	1.52e-23	Increased	2.992	ARHGDIB	Rho GDP dissociation inhibitor beta	Cytoplasm	enzyme	6.05334e-05	1.96135e-06	up	3.30009	3.30009	1.7225	143
Cellular Movement	migration of cells	1.52e-23	Increased	2.992	ARRDC3	arrestin domain containing 3	Plasma Membrane	other	0.000106882	9.78984e-06	down	2.06704	-2.06704	-1.04756	143
Cellular Movement	migration of cells	1.52e-23	Increased	2.992	ATP8A1	ATPase phospholipid transporting 8A1	Cytoplasm	transporter	0.0014257	0.00102394	down	4.30788	-4.30788	-2.10698	143
Cellular Movement	migration of cells	1.52e-23	Increased	2.992	C3	complement component 3	Extracellular Space	peptidase	0.000166276	2.38974e-05	up	3.15758	3.15758	1.65882	143
Cellular Movement	migration of cells	1.52e-23	Increased	2.992	CCL2	C-C motif chemokine ligand 2	Extracellular Space	cytokine	5.71384e-05	1.64325e-06	up	4.18932	4.18932	2.06672	143
Cellular Movement	migration of cells	1.52e-23	Increased	2.992	CCL20	C-C motif chemokine ligand 20	Extracellular Space	cytokine	0.00012705	1.42377e-05	up	3.12207	3.12207	1.6425	143
Cellular Movement	migration of cells	1.52e-23	Increased	2.992	CCL5	C-C motif chemokine ligand 5	Extracellular Space	cytokine	0.000244253	5.08419e-05	up	3.69923	3.69923	1.88723	143
Cellular Movement	migration of cells	1.52e-23	Increased	2.992	CCRL2	C-C motif chemokine receptor like 2	Plasma Membrane	G-protein coupled receptor	0.000666537	0.000320999	up	2.14323	2.14323	1.09978	143
Cellular Movement	migration of cells	1.52e-23	Increased	2.992	CD40	CD40 molecule	Plasma Membrane	transmembrane receptor	9.69248e-05	8.01981e-06	up	2.53917	2.53917	1.34436	143
Cellular Movement	migration of cells	1.52e-23	Increased	2.992	CD82	CD82 molecule	Plasma Membrane	other	0.000155574	2.11222e-05	up	2.66006	2.66006	1.41146	143
Cellular Movement	migration of cells	1.52e-23	Increased	2.992	CDKN1A	cyclin-dependent kinase inhibitor 1A	Nucleus	kinase	0.000177018	2.76906e-05	up	2.34183	2.34183	1.22764	143
Cellular Movement	migration of cells	1.52e-23	Increased	2.992	CHST1	carbohydrate sulfotransferase 1	Cytoplasm	enzyme	0.00110681	0.000717112	up	3.40019	3.40019	1.76562	143
Cellular Movement	migration of cells	1.52e-23	Increased	2.992	CLEC4E	C-type lectin domain family 4 member E	Plasma Membrane	other	3.65159e-05	2.25759e-07	up	3.93093	3.93093	1.97487	143
Cellular Movement	migration of cells	1.52e-23	Increased	2.992	COL17A1	collagen type XVII alpha 1	Extracellular Space	other	0.00172369	0.00130231	up	2.55161	2.55161	1.35141	143
Cellular Movement	migration of cells	1.52e-23	Increased	2.992	CSF2	colony stimulating factor 2	Extracellular Space	cytokine	0.000181511	2.91396e-05	up	3.2134	3.2134	1.6841	143
Cellular Movement	migration of cells	1.52e-23	Increased	2.992	CTSS	cathepsin S	Cytoplasm	peptidase	0.000531564	0.000215648	up	3.37352	3.37352	1.75426	143
Cellular Movement	migration of cells	1.52e-23	Increased	2.992	CXCL1	C-X-C motif chemokine ligand 1	Extracellular Space	cytokine	7.2018e-05	3.46222e-06	up	2.66667	2.66667	1.41504	143
Cellular Movement	migration of cells	1.52e-23	Increased	2.992	CXCL11	C-X-C motif chemokine ligand 11	Other	cytokine	0.000621227	0.000282085	up	2.52305	2.52305	1.33517	143
Cellular Movement	migration of cells	1.52e-23	Increased	2.992	CXCL2	C-X-C motif chemokine ligand 2	Extracellular Space	cytokine	7.29755e-05	3.81133e-06	up	2.98142	2.98142	1.576	143
Cellular Movement	migration of cells	1.52e-23	Increased	2.992	CXCL3	C-X-C motif chemokine ligand 3	Extracellular Space	cytokine	0.000453284	0.000162494	up	3.10131	3.10131	1.63288	143
Cellular Movement	migration of cells	1.52e-23	Increased	2.992	CXCL5	C-X-C motif chemokine ligand 5	Extracellular Space	cytokine	0.000517835	0.000205801	up	2.85352	2.85352	1.51274	143
Cellular Movement	migration of cells	1.52e-23	Increased	2.992	CXCL8	C-X-C motif chemokine ligand 8	Extracellular Space	cytokine	4.70395e-05	7.41202e-07	up	6.01014	6.01014	2.5874	143
Cellular Movement	migration of cells	1.52e-23	Increased	2.992	CYLD	CYLD lysine 63 deubiquitinase	Nucleus	transcription regulator	5.67199e-05	1.53037e-06	up	2.37536	2.37536	1.24815	143
Cellular Movement	migration of cells	1.52e-23	Increased	2.992	DDX58	DEXD/H-box helicase 58	Cytoplasm	enzyme	7.88016e-05	4.63882e-06	up	2.39664	2.39664	1.26101	143
Cellular Movement	migration of cells	1.52e-23	Increased	2.992	DNAJB6	DnaJ heat shock protein family (Hsp40) member B6	Nucleus	transcription regulator	4.56082e-05	6.29335e-07	up	2.6549	2.6549	1.40866	143
Cellular Movement	migration of cells	1.52e-23	Increased	2.992	DOCK4	dedicator of cytokinesis 4	Plasma Membrane	other	3.0027e-05	8.92081e-08	up	3.29638	3.29638	1.72088	143
Cellular Movement	migration of cells	1.52e-23	Increased	2.992	DUSP6	dual specificity phosphatase 6	Cytoplasm	phosphatase	4.05507e-05	3.60207e-07	up	4.36083	4.36083	2.1246	143
Cellular Movement	migration of cells	1.52e-23	Increased	2.992	EGLN3	egl-9 family hypoxia-inducible factor 3	Cytoplasm	enzyme	0.000151048	1.99892e-05	down	2.79284	-2.79284	-1.48173	143
Cellular Movement	migration of cells	1.52e-23	Increased	2.992	EGR1	early growth response 1	Nucleus	transcription regulator	0.000910266	0.000531525	down	2.02311	-2.02311	-1.01658	143
Cellular Movement	migration of cells	1.52e-23	Increased	2.992	ELK3	ELK3, ETS transcription factor	Nucleus	transcription regulator	0.00024621	5.1675e-05	up	2.23868	2.23868	1.16265	143
Cellular Movement	migration of cells	1.52e-23	Increased	2.992	ENAH	enabled homolog (Drosophila)	Plasma Membrane	other	0.00010603	9.54714e-06	down	2.97451	-2.97451	-1.57265	143
Cellular Movement	migration of cells	1.52e-23	Increased	2.992	EPHB1	EPH receptor B1	Plasma Membrane	kinase	0.0001348	1.60689e-05	up	2.30644	2.30644	1.20567	143
Cellular Movement	migration of cells	1.52e-23	Increased	2.992	ETS1	ETS proto-oncogene 1, transcription factor	Nucleus	transcription regulator	0.000727446	0.000371116	up	2.14953	2.14953	1.10402	143
Cellular Movement	migration of cells	1.52e-23	Increased	2.992	ETV5	ETS variant 5	Nucleus	transcription regulator	0.000287693	7.17426e-05	up	2.60151	2.60151	1.37935	143
Cellular Movement	migration of cells	1.52e-23	Increased	2.992	F3	coagulation factor III, tissue factor	Plasma Membrane	transmembrane receptor	0.000167293	2.45862e-05	up	2.83358	2.83358	1.50263	143
Cellular Movement	migration of cells	1.52e-23	Increased	2.992	FGF1	fibroblast growth factor 1	Extracellular Space	growth factor	0.000689416	0.000339749	up	2.7327	2.7327	1.45033	143
Cellular Movement	migration of cells	1.52e-23	Increased	2.992	FGF5	fibroblast growth factor 5	Extracellular Space	growth factor	3.65159e-05	2.83522e-07	up	3.22383	3.22383	1.68878	143
Cellular Movement	migration of cells	1.52e-23	Increased	2.992	FGFR2	fibroblast growth factor receptor 2	Plasma Membrane	kinase	0.000292993	7.4204e-05	down	4.45302	-4.45302	-2.15478	143
Cellular Movement	migration of cells	1.52e-23	Increased	2.992	GAB1	GRB2 associated binding protein 1	Cytoplasm	kinase	0.000120758	1.28231e-05	down	2.38756	-2.38756	-1.25554	143
Cellular Movement	migration of cells	1.52e-23	Increased	2.992	GAL3ST1	galactose-3-O-sulfotransferase 1	Cytoplasm	enzyme	7.01231e-05	3.15466e-06	down	2.06855	-2.06855	-1.04862	143
Cellular Movement	migration of cells	1.52e-23	Increased	2.992	GDF15	growth differentiation factor 15	Extracellular Space	growth factor	0.00194823	0.00151467	up	2.20534	2.20534	1.141	143
Cellular Movement	migration of cells	1.52e-23	Increased	2.992	GJB2	gap junction protein beta 2	Plasma Membrane	transporter	4.21674e-05	4.2607e-07	up	2.38678	2.38678	1.25507	143
Cellular Movement	migration of cells	1.52e-23	Increased	2.992	GNG12	G protein subunit gamma 12	Plasma Membrane	enzyme	0.000320542	8.8399e-05	down	3.05299	-3.05299	-1.61022	143
Cellular Movement	migration of cells	1.52e-23	Increased	2.992	GUCY1B3	guanylate cyclase 1, soluble, beta 3	Cytoplasm	enzyme	0.000294466	7.54152e-05	down	2.03253	-2.03253	-1.02328	143
Cellular Movement	migration of cells	1.52e-23	Increased	2.992	HAS2	hyaluronan synthase 2	Plasma Membrane	enzyme	8.96643e-05	6.63704e-06	up	2.84304	2.84304	1.50743	143
Cellular Movement	migration of cells	1.52e-23	Increased	2.992	HAVCR1	hepatitis A virus cellular receptor 1	Plasma Membrane	other	0.000114195	1.1129e-05	down	2.97561	-2.97561	-1.57319	143
Cellular Movement	migration of cells	1.52e-23	Increased	2.992	HBEGF	heparin binding EGF like growth factor	Extracellular Space	growth factor	0.000324605	9.06211e-05	up	2.92802	2.92802	1.54993	143
Cellular Movement	migration of cells	1.52e-23	Increased	2.992	HMGA2	high mobility group AT-hook 2	Nucleus	enzyme	7.36928e-05	3.96405e-06	up	2.57121	2.57121	1.36245	143
Cellular Movement	migration of cells	1.52e-23	Increased	2.992	HMOX1	heme oxygenase 1	Cytoplasm	enzyme	3.07978e-05	1.0198e-07	up	7.17615	7.17615	2.84321	143
Cellular Movement	migration of cells	1.52e-23	Increased	2.992	ICAM1	intercellular adhesion molecule 1	Plasma Membrane	transmembrane receptor	4.25833e-05	4.82261e-07	up	4.88337	4.88337	2.28788	143
Cellular Movement	migration of cells	1.52e-23	Increased	2.992	ID1	inhibitor of DNA binding 1, HLH protein	Nucleus	transcription regulator	6.27081e-05	2.40082e-06	down	2.32483	-2.32483	-1.21713	143
Cellular Movement	migration of cells	1.52e-23	Increased	2.992	IGFBP3	insulin like growth factor binding protein 3	Extracellular Space	other	2.3646e-05	3.67681e-08	down	2.30432	-2.30432	-1.20434	143
Cellular Movement	migration of cells	1.52e-23	Increased	2.992	IL6	interleukin 6	Extracellular Space	cytokine	3.65159e-05	2.68298e-07	up	2.78882	2.78882	1.47965	143
Cellular Movement	migration of cells	1.52e-23	Increased	2.992	ILF3	interleukin enhancer binding factor 3	Nucleus	transcription regulator	4.25833e-05	4.81981e-07	down	2.13305	-2.13305	-1.09292	143
Cellular Movement	migration of cells	1.52e-23	Increased	2.992	INHBA	inhibin beta A	Extracellular Space	growth factor	6.18657e-05	2.29577e-06	up	3.71771	3.71771	1.89441	143
Cellular Movement	migration of cells	1.52e-23	Increased	2.992	ITGA2	integrin subunit alpha 2	Plasma Membrane	transmembrane receptor	0.000106124	9.61516e-06	up	4.46447	4.46447	2.15849	143
Cellular Movement	migration of cells	1.52e-23	Increased	2.992	ITGB6	integrin subunit beta 6	Plasma Membrane	other	0.000220499	4.13446e-05	down	2.73909	-2.73909	-1.4537	143
Cellular Movement	migration of cells	1.52e-23	Increased	2.992	KITLG	KIT ligand	Extracellular Space	growth factor	3.70634e-05	2.92673e-07	down	2.80656	-2.80656	-1.4888	143
Cellular Movement	migration of cells	1.52e-23	Increased	2.992	KLF4	Kruppel-like factor 4 (gut)	Nucleus	transcription regulator	8.10095e-05	5.36545e-06	up	3.086	3.086	1.62574	143
Cellular Movement	migration of cells	1.52e-23	Increased	2.992	LAMB3	laminin subunit beta 3	Extracellular Space	transporter	4.21995e-05	4.45304e-07	up	3.24474	3.24474	1.6981	143
Cellular Movement	migration of cells	1.52e-23	Increased	2.992	LAMC2	laminin subunit gamma 2	Extracellular Space	other	4.99694e-05	1.06168e-06	up	2.58961	2.58961	1.37274	143
Cellular Movement	migration of cells	1.52e-23	Increased	2.992	LCP1	lymphocyte cytosolic protein 1	Cytoplasm	other	0.000136714	1.65312e-05	up	3.16095	3.16095	1.66036	143
Cellular Movement	migration of cells	1.52e-23	Increased	2.992	LITAF	lipopolysaccharide induced TNF factor	Nucleus	transcription regulator	5.71384e-05	1.65447e-06	down	2.76449	-2.76449	-1.46701	143
Cellular Movement	migration of cells	1.52e-23	Increased	2.992	LTB	lymphotoxin beta	Extracellular Space	cytokine	0.000325041	9.10768e-05	up	3.23391	3.23391	1.69328	143
Cellular Movement	migration of cells	1.52e-23	Increased	2.992	LY96	lymphocyte antigen 96	Plasma Membrane	transmembrane receptor	0.000399174	0.000129442	up	2.09875	2.09875	1.06953	143
Cellular Movement	migration of cells	1.52e-23	Increased	2.992	MAP3K1	mitogen-activated protein kinase kinase kinase 1	Cytoplasm	kinase	0.000104164	9.08987e-06	down	2.99182	-2.99182	-1.58102	143
Cellular Movement	migration of cells	1.52e-23	Increased	2.992	MAP4K4	mitogen-activated protein kinase kinase kinase kinase 4	Cytoplasm	kinase	0.000136555	1.64327e-05	up	2.15776	2.15776	1.10954	143
Cellular Movement	migration of cells	1.52e-23	Increased	2.992	MAVS	mitochondrial antiviral signaling protein	Cytoplasm	other	0.001397	0.000996787	down	2.47268	-2.47268	-1.30607	143
Cellular Movement	migration of cells	1.52e-23	Increased	2.992	MIR17HG	miR-17-92a-1 cluster host gene	Other	other	0.000810491	0.000443466	down	2.15606	-2.15606	-1.1084	143
Cellular Movement	migration of cells	1.52e-23	Increased	2.992	MMP1	matrix metallopeptidase 1	Extracellular Space	peptidase	2.99009e-05	6.82824e-08	up	3.68258	3.68258	1.88072	143
Cellular Movement	migration of cells	1.52e-23	Increased	2.992	MMP14	matrix metallopeptidase 14	Extracellular Space	peptidase	5.71384e-05	1.58188e-06	up	2.21198	2.21198	1.14534	143
Cellular Movement	migration of cells	1.52e-23	Increased	2.992	MMP7	matrix metallopeptidase 7	Extracellular Space	peptidase	0.000324617	9.07357e-05	down	4.18581	-4.18581	-2.06551	143
Cellular Movement	migration of cells	1.52e-23	Increased	2.992	MMP9	matrix metallopeptidase 9	Extracellular Space	peptidase	0.000105861	9.4402e-06	up	5.58648	5.58648	2.48194	143
Cellular Movement	migration of cells	1.52e-23	Increased	2.992	MYO10	myosin X	Cytoplasm	other	0.000162608	2.2763e-05	up	3.21829	3.21829	1.68629	143
Cellular Movement	migration of cells	1.52e-23	Increased	2.992	NCF2	neutrophil cytosolic factor 2	Cytoplasm	enzyme	0.000241371	4.9582e-05	up	2.83754	2.83754	1.50464	143
Cellular Movement	migration of cells	1.52e-23	Increased	2.992	NDEL1	nudE neurodevelopment protein 1 like 1	Nucleus	other	9.02543e-05	6.7397e-06	up	2.10114	2.10114	1.07117	143
Cellular Movement	migration of cells	1.52e-23	Increased	2.992	NLRP3	NLR family, pyrin domain containing 3	Cytoplasm	other	0.000235207	4.68615e-05	up	3.66524	3.66524	1.87391	143
Cellular Movement	migration of cells	1.52e-23	Increased	2.992	NREP	neuronal regeneration related protein	Cytoplasm	other	3.0027e-05	9.59985e-08	down	2.03785	-2.03785	-1.02705	143
Cellular Movement	migration of cells	1.52e-23	Increased	2.992	NRP2	neuropilin 2	Plasma Membrane	kinase	0.000805229	0.000439483	down	2.02262	-2.02262	-1.01622	143
Cellular Movement	migration of cells	1.52e-23	Increased	2.992	NT5E	5'-nucleotidase ecto	Plasma Membrane	phosphatase	8.09449e-05	5.25908e-06	up	3.37637	3.37637	1.75547	143
Cellular Movement	migration of cells	1.52e-23	Increased	2.992	P2RY2	purinergic receptor P2Y2	Plasma Membrane	G-protein coupled receptor	0.000285062	7.05316e-05	up	2.09703	2.09703	1.06835	143
Cellular Movement	migration of cells	1.52e-23	Increased	2.992	PAPPA	pappalysin 1	Extracellular Space	peptidase	0.000596275	0.000262189	up	2.6645	2.6645	1.41387	143
Cellular Movement	migration of cells	1.52e-23	Increased	2.992	PDCD1LG2	programmed cell death 1 ligand 2	Plasma Membrane	enzyme	8.09449e-05	5.28019e-06	up	3.84934	3.84934	1.94461	143
Cellular Movement	migration of cells	1.52e-23	Increased	2.992	PDCL	phosducin like	Cytoplasm	enzyme	0.000408328	0.000135021	down	2.04215	-2.04215	-1.03009	143
Cellular Movement	migration of cells	1.52e-23	Increased	2.992	PDE4DIP	phosphodiesterase 4D interacting protein	Cytoplasm	enzyme	0.00265385	0.00219068	up	2.03402	2.03402	1.02434	143
Cellular Movement	migration of cells	1.52e-23	Increased	2.992	PELI1	pellino E3 ubiquitin protein ligase 1	Cytoplasm	enzyme	0.00158172	0.00117464	down	2.50182	-2.50182	-1.32298	143
Cellular Movement	migration of cells	1.52e-23	Increased	2.992	PEX13	peroxisomal biogenesis factor 13	Cytoplasm	transporter	7.25781e-05	3.65497e-06	down	2.32362	-2.32362	-1.21637	143
Cellular Movement	migration of cells	1.52e-23	Increased	2.992	PHB2	prohibitin 2	Cytoplasm	transcription regulator	8.50289e-05	5.93702e-06	down	2.19986	-2.19986	-1.13741	143
Cellular Movement	migration of cells	1.52e-23	Increased	2.992	PHLDA1	pleckstrin homology like domain family A member 1	Cytoplasm	other	4.21674e-05	4.04011e-07	up	2.56874	2.56874	1.36106	143
Cellular Movement	migration of cells	1.52e-23	Increased	2.992	PLA2G4A	phospholipase A2 group IVA	Cytoplasm	enzyme	0.000319621	8.78429e-05	up	2.0774	2.0774	1.05478	143
Cellular Movement	migration of cells	1.52e-23	Increased	2.992	PLAT	plasminogen activator, tissue type	Extracellular Space	peptidase	0.000324331	9.0357e-05	up	2.93037	2.93037	1.55108	143
Cellular Movement	migration of cells	1.52e-23	Increased	2.992	PLAU	plasminogen activator, urokinase	Extracellular Space	peptidase	7.29755e-05	3.74487e-06	up	4.08751	4.08751	2.03122	143
Cellular Movement	migration of cells	1.52e-23	Increased	2.992	PLAUR	plasminogen activator, urokinase receptor	Plasma Membrane	transmembrane receptor	5.72628e-05	1.70817e-06	up	3.57375	3.57375	1.83744	143
Cellular Movement	migration of cells	1.52e-23	Increased	2.992	PODXL	podocalyxin like	Plasma Membrane	kinase	6.8669e-05	2.89323e-06	up	2.31816	2.31816	1.21298	143
Cellular Movement	migration of cells	1.52e-23	Increased	2.992	PPIA	peptidylprolyl isomerase A	Cytoplasm	enzyme	0.000213482	3.91661e-05	down	3.11421	-3.11421	-1.63887	143
Cellular Movement	migration of cells	1.52e-23	Increased	2.992	PPIF	peptidylprolyl isomerase F	Cytoplasm	enzyme	0.000117299	1.19067e-05	up	2.2634	2.2634	1.17849	143
Cellular Movement	migration of cells	1.52e-23	Increased	2.992	PROCR	protein C receptor	Plasma Membrane	other	4.80549e-05	8.55968e-07	down	2.18783	-2.18783	-1.1295	143
Cellular Movement	migration of cells	1.52e-23	Increased	2.992	PTX3	pentraxin 3	Extracellular Space	other	0.000292993	7.42705e-05	up	3.61367	3.61367	1.85347	143
Cellular Movement	migration of cells	1.52e-23	Increased	2.992	RAP1A	RAP1A, member of RAS oncogene family	Cytoplasm	enzyme	5.67199e-05	1.48871e-06	up	2.16819	2.16819	1.11649	143
Cellular Movement	migration of cells	1.52e-23	Increased	2.992	RCAN1	regulator of calcineurin 1	Nucleus	transcription regulator	7.03519e-05	3.19708e-06	up	2.17179	2.17179	1.11888	143
Cellular Movement	migration of cells	1.52e-23	Increased	2.992	RGS3	regulator of G-protein signaling 3	Nucleus	other	0.00146999	0.00106616	up	2.21155	2.21155	1.14506	143
Cellular Movement	migration of cells	1.52e-23	Increased	2.992	RGS4	regulator of G-protein signaling 4	Cytoplasm	other	4.9534e-05	9.97018e-07	up	2.89909	2.89909	1.5356	143
Cellular Movement	migration of cells	1.52e-23	Increased	2.992	RHOB	ras homolog family member B	Cytoplasm	enzyme	6.81397e-05	2.79312e-06	down	3.93244	-3.93244	-1.97543	143
Cellular Movement	migration of cells	1.52e-23	Increased	2.992	ROBO4	roundabout guidance receptor 4	Plasma Membrane	other	0.00240454	0.0019518	up	4.75767	4.75767	2.25026	143
Cellular Movement	migration of cells	1.52e-23	Increased	2.992	RPS6KA5	ribosomal protein S6 kinase A5	Nucleus	kinase	0.000896053	0.000519236	up	2.57033	2.57033	1.36195	143
Cellular Movement	migration of cells	1.52e-23	Increased	2.992	RPSA	ribosomal protein SA	Cytoplasm	translation regulator	4.9534e-05	1.00921e-06	up	4.16121	4.16121	2.057	143
Cellular Movement	migration of cells	1.52e-23	Increased	2.992	RUFY3	RUN and FYVE domain containing 3	Plasma Membrane	other	9.42406e-05	7.47856e-06	down	2.03719	-2.03719	-1.02658	143
Cellular Movement	migration of cells	1.52e-23	Increased	2.992	S1PR1	sphingosine-1-phosphate receptor 1	Plasma Membrane	G-protein coupled receptor	1.48349e-06	3.38774e-10	down	7.79723	-7.79723	-2.96296	143
Cellular Movement	migration of cells	1.52e-23	Increased	2.992	SAA1	serum amyloid A1	Extracellular Space	transporter	7.47863e-05	4.10752e-06	up	2.96712	2.96712	1.56907	143
Cellular Movement	migration of cells	1.52e-23	Increased	2.992	SEMA3A	semaphorin 3A	Extracellular Space	other	0.000519394	0.000207155	up	2.7446	2.7446	1.4566	143
Cellular Movement	migration of cells	1.52e-23	Increased	2.992	SEMA3C	semaphorin 3C	Extracellular Space	other	7.89682e-05	4.88712e-06	up	2.25702	2.25702	1.17442	143
Cellular Movement	migration of cells	1.52e-23	Increased	2.992	SEMA6A	semaphorin 6A	Plasma Membrane	transmembrane receptor	0.000689694	0.000340277	down	2.06704	-2.06704	-1.04756	143
Cellular Movement	migration of cells	1.52e-23	Increased	2.992	SEMA6D	semaphorin 6D	Plasma Membrane	other	0.000594512	0.000260818	down	2.52299	-2.52299	-1.33513	143
Cellular Movement	migration of cells	1.52e-23	Increased	2.992	SERP1	stress-associated endoplasmic reticulum protein 1	Cytoplasm	other	7.47863e-05	4.12444e-06	up	3.26233	3.26233	1.7059	143
Cellular Movement	migration of cells	1.52e-23	Increased	2.992	SERPINB2	serpin family B member 2	Extracellular Space	other	0.00148016	0.00107657	up	4.30458	4.30458	2.10587	143
Cellular Movement	migration of cells	1.52e-23	Increased	2.992	SERPIND1	serpin family D member 1	Extracellular Space	other	0.000730228	0.000373821	up	2.96837	2.96837	1.56967	143
Cellular Movement	migration of cells	1.52e-23	Increased	2.992	SFRP4	secreted frizzled related protein 4	Plasma Membrane	transmembrane receptor	0.00117179	0.000782337	down	2.0725	-2.0725	-1.05137	143
Cellular Movement	migration of cells	1.52e-23	Increased	2.992	SLC1A3	solute carrier family 1 member 3	Plasma Membrane	transporter	0.000666537	0.000319893	up	2.92206	2.92206	1.54699	143
Cellular Movement	migration of cells	1.52e-23	Increased	2.992	SOD2	superoxide dismutase 2, mitochondrial	Cytoplasm	enzyme	5.71384e-05	1.58904e-06	up	2.2088	2.2088	1.14326	143
Cellular Movement	migration of cells	1.52e-23	Increased	2.992	SP100	SP100 nuclear antigen	Nucleus	transcription regulator	0.000850382	0.00047736	up	2.11249	2.11249	1.07894	143
Cellular Movement	migration of cells	1.52e-23	Increased	2.992	SPRY2	sprouty RTK signaling antagonist 2	Plasma Membrane	other	0.000410306	0.000136093	up	2.82721	2.82721	1.49938	143
Cellular Movement	migration of cells	1.52e-23	Increased	2.992	STAT1	signal transducer and activator of transcription 1	Nucleus	transcription regulator	0.000127302	1.44319e-05	down	2.48387	-2.48387	-1.31259	143
Cellular Movement	migration of cells	1.52e-23	Increased	2.992	STC1	stanniocalcin 1	Extracellular Space	kinase	0.000278723	6.72781e-05	up	2.19527	2.19527	1.1344	143
Cellular Movement	migration of cells	1.52e-23	Increased	2.992	SWAP70	SWAP switching B-cell complex 70kDa subunit	Cytoplasm	other	5.71384e-05	1.62624e-06	down	2.19703	-2.19703	-1.13556	143
Cellular Movement	migration of cells	1.52e-23	Increased	2.992	TAB2	TGF-beta activated kinase 1/MAP3K7 binding protein 2	Cytoplasm	other	7.07354e-05	3.22612e-06	down	2.16795	-2.16795	-1.11633	143
Cellular Movement	migration of cells	1.52e-23	Increased	2.992	THBD	thrombomodulin	Plasma Membrane	transmembrane receptor	8.17504e-05	5.46994e-06	up	3.21574	3.21574	1.68515	143
Cellular Movement	migration of cells	1.52e-23	Increased	2.992	THRB	thyroid hormone receptor beta	Nucleus	ligand-dependent nuclear receptor	0.000438312	0.000152593	down	3.65533	-3.65533	-1.87	143
Cellular Movement	migration of cells	1.52e-23	Increased	2.992	TLR2	toll like receptor 2	Plasma Membrane	transmembrane receptor	8.09449e-05	5.23963e-06	up	4.16405	4.16405	2.05799	143
Cellular Movement	migration of cells	1.52e-23	Increased	2.992	TNF	tumor necrosis factor	Extracellular Space	cytokine	0.000291147	7.31026e-05	up	2.74571	2.74571	1.45718	143
Cellular Movement	migration of cells	1.52e-23	Increased	2.992	TNFAIP3	TNF alpha induced protein 3	Nucleus	enzyme	4.63841e-05	6.73483e-07	up	3.2656	3.2656	1.70735	143
Cellular Movement	migration of cells	1.52e-23	Increased	2.992	TNFRSF19	tumor necrosis factor receptor superfamily member 19	Plasma Membrane	transmembrane receptor	7.83021e-05	4.53929e-06	down	3.32882	-3.32882	-1.73501	143
Cellular Movement	migration of cells	1.52e-23	Increased	2.992	UCP2	uncoupling protein 2	Cytoplasm	transporter	0.000212663	3.87543e-05	down	2.04574	-2.04574	-1.03262	143
Cellular Movement	migration of cells	1.52e-23	Increased	2.992	VAV3	vav guanine nucleotide exchange factor 3	Extracellular Space	cytokine	9.63321e-05	7.8327e-06	down	8.02289	-8.02289	-3.00412	143
Cellular Movement	migration of cells	1.52e-23	Increased	2.992	VDR	vitamin D (1,25- dihydroxyvitamin D3) receptor	Nucleus	transcription regulator	0.000664155	0.000317745	up	3.17167	3.17167	1.66524	143
Cellular Movement	migration of cells	1.52e-23	Increased	2.992	VEGFC	vascular endothelial growth factor C	Extracellular Space	growth factor	4.25833e-05	4.70028e-07	up	2.6596	2.6596	1.41121	143
Cellular Movement	migration of cells	1.52e-23	Increased	2.992	WNT5A	Wnt family member 5A	Extracellular Space	cytokine	9.09658e-05	6.84293e-06	up	3.07702	3.07702	1.62154	143
Cellular Movement	migration of cells	1.52e-23	Increased	2.992	XDH	xanthine dehydrogenase	Cytoplasm	enzyme	0.000240351	4.90388e-05	up	2.04405	2.04405	1.03143	143
Cellular Movement	cell movement	4.88e-22	Increased	2.454	ABHD2	abhydrolase domain containing 2	Other	enzyme	4.9534e-05	1.01467e-06	down	2.64079	-2.64079	-1.40097	150
Cellular Movement	cell movement	4.88e-22	Increased	2.454	ACKR3	atypical chemokine receptor 3	Plasma Membrane	G-protein coupled receptor	0.00018251	2.96362e-05	up	2.02777	2.02777	1.0199	150
Cellular Movement	cell movement	4.88e-22	Increased	2.454	ADORA2B	adenosine A2b receptor	Plasma Membrane	G-protein coupled receptor	0.000155574	2.11387e-05	up	2.26916	2.26916	1.18216	150
Cellular Movement	cell movement	4.88e-22	Increased	2.454	AIMP1	aminoacyl tRNA synthetase complex-interacting multifunctional protein 1	Extracellular Space	cytokine	0.00061013	0.000272183	down	2.17524	-2.17524	-1.12117	150
Cellular Movement	cell movement	4.88e-22	Increased	2.454	ALOX5AP	arachidonate 5-lipoxygenase activating protein	Plasma Membrane	other	0.000451005	0.00016139	up	2.27085	2.27085	1.18323	150
Cellular Movement	cell movement	4.88e-22	Increased	2.454	AREG	amphiregulin	Extracellular Space	growth factor	0.00030687	8.06945e-05	up	2.63063	2.63063	1.39541	150
Cellular Movement	cell movement	4.88e-22	Increased	2.454	ARHGAP22	Rho GTPase activating protein 22	Cytoplasm	other	4.21995e-05	4.57747e-07	up	2.59293	2.59293	1.37458	150
Cellular Movement	cell movement	4.88e-22	Increased	2.454	ARHGDIB	Rho GDP dissociation inhibitor beta	Cytoplasm	enzyme	6.05334e-05	1.96135e-06	up	3.30009	3.30009	1.7225	150
Cellular Movement	cell movement	4.88e-22	Increased	2.454	ARRDC3	arrestin domain containing 3	Plasma Membrane	other	0.000106882	9.78984e-06	down	2.06704	-2.06704	-1.04756	150
Cellular Movement	cell movement	4.88e-22	Increased	2.454	ARTN	artemin	Extracellular Space	growth factor	0.000206984	3.7069e-05	down	2.07866	-2.07866	-1.05565	150
Cellular Movement	cell movement	4.88e-22	Increased	2.454	ATP8A1	ATPase phospholipid transporting 8A1	Cytoplasm	transporter	0.0014257	0.00102394	down	4.30788	-4.30788	-2.10698	150
Cellular Movement	cell movement	4.88e-22	Increased	2.454	C3	complement component 3	Extracellular Space	peptidase	0.000166276	2.38974e-05	up	3.15758	3.15758	1.65882	150
Cellular Movement	cell movement	4.88e-22	Increased	2.454	CCL2	C-C motif chemokine ligand 2	Extracellular Space	cytokine	5.71384e-05	1.64325e-06	up	4.18932	4.18932	2.06672	150
Cellular Movement	cell movement	4.88e-22	Increased	2.454	CCL20	C-C motif chemokine ligand 20	Extracellular Space	cytokine	0.00012705	1.42377e-05	up	3.12207	3.12207	1.6425	150
Cellular Movement	cell movement	4.88e-22	Increased	2.454	CCL5	C-C motif chemokine ligand 5	Extracellular Space	cytokine	0.000244253	5.08419e-05	up	3.69923	3.69923	1.88723	150
Cellular Movement	cell movement	4.88e-22	Increased	2.454	CCRL2	C-C motif chemokine receptor like 2	Plasma Membrane	G-protein coupled receptor	0.000666537	0.000320999	up	2.14323	2.14323	1.09978	150
Cellular Movement	cell movement	4.88e-22	Increased	2.454	CD40	CD40 molecule	Plasma Membrane	transmembrane receptor	9.69248e-05	8.01981e-06	up	2.53917	2.53917	1.34436	150
Cellular Movement	cell movement	4.88e-22	Increased	2.454	CD82	CD82 molecule	Plasma Membrane	other	0.000155574	2.11222e-05	up	2.66006	2.66006	1.41146	150
Cellular Movement	cell movement	4.88e-22	Increased	2.454	CDKN1A	cyclin-dependent kinase inhibitor 1A	Nucleus	kinase	0.000177018	2.76906e-05	up	2.34183	2.34183	1.22764	150
Cellular Movement	cell movement	4.88e-22	Increased	2.454	CHST1	carbohydrate sulfotransferase 1	Cytoplasm	enzyme	0.00110681	0.000717112	up	3.40019	3.40019	1.76562	150
Cellular Movement	cell movement	4.88e-22	Increased	2.454	CLEC4E	C-type lectin domain family 4 member E	Plasma Membrane	other	3.65159e-05	2.25759e-07	up	3.93093	3.93093	1.97487	150
Cellular Movement	cell movement	4.88e-22	Increased	2.454	COL17A1	collagen type XVII alpha 1	Extracellular Space	other	0.00172369	0.00130231	up	2.55161	2.55161	1.35141	150
Cellular Movement	cell movement	4.88e-22	Increased	2.454	CSF2	colony stimulating factor 2	Extracellular Space	cytokine	0.000181511	2.91396e-05	up	3.2134	3.2134	1.6841	150
Cellular Movement	cell movement	4.88e-22	Increased	2.454	CTSS	cathepsin S	Cytoplasm	peptidase	0.000531564	0.000215648	up	3.37352	3.37352	1.75426	150
Cellular Movement	cell movement	4.88e-22	Increased	2.454	CXCL1	C-X-C motif chemokine ligand 1	Extracellular Space	cytokine	7.2018e-05	3.46222e-06	up	2.66667	2.66667	1.41504	150
Cellular Movement	cell movement	4.88e-22	Increased	2.454	CXCL11	C-X-C motif chemokine ligand 11	Other	cytokine	0.000621227	0.000282085	up	2.52305	2.52305	1.33517	150
Cellular Movement	cell movement	4.88e-22	Increased	2.454	CXCL2	C-X-C motif chemokine ligand 2	Extracellular Space	cytokine	7.29755e-05	3.81133e-06	up	2.98142	2.98142	1.576	150
Cellular Movement	cell movement	4.88e-22	Increased	2.454	CXCL3	C-X-C motif chemokine ligand 3	Extracellular Space	cytokine	0.000453284	0.000162494	up	3.10131	3.10131	1.63288	150
Cellular Movement	cell movement	4.88e-22	Increased	2.454	CXCL5	C-X-C motif chemokine ligand 5	Extracellular Space	cytokine	0.000517835	0.000205801	up	2.85352	2.85352	1.51274	150
Cellular Movement	cell movement	4.88e-22	Increased	2.454	CXCL8	C-X-C motif chemokine ligand 8	Extracellular Space	cytokine	4.70395e-05	7.41202e-07	up	6.01014	6.01014	2.5874	150
Cellular Movement	cell movement	4.88e-22	Increased	2.454	CYLD	CYLD lysine 63 deubiquitinase	Nucleus	transcription regulator	5.67199e-05	1.53037e-06	up	2.37536	2.37536	1.24815	150
Cellular Movement	cell movement	4.88e-22	Increased	2.454	DDX58	DEXD/H-box helicase 58	Cytoplasm	enzyme	7.88016e-05	4.63882e-06	up	2.39664	2.39664	1.26101	150
Cellular Movement	cell movement	4.88e-22	Increased	2.454	DNAJB6	DnaJ heat shock protein family (Hsp40) member B6	Nucleus	transcription regulator	4.56082e-05	6.29335e-07	up	2.6549	2.6549	1.40866	150
Cellular Movement	cell movement	4.88e-22	Increased	2.454	DOCK4	dedicator of cytokinesis 4	Plasma Membrane	other	3.0027e-05	8.92081e-08	up	3.29638	3.29638	1.72088	150
Cellular Movement	cell movement	4.88e-22	Increased	2.454	DUSP6	dual specificity phosphatase 6	Cytoplasm	phosphatase	4.05507e-05	3.60207e-07	up	4.36083	4.36083	2.1246	150
Cellular Movement	cell movement	4.88e-22	Increased	2.454	EGLN3	egl-9 family hypoxia-inducible factor 3	Cytoplasm	enzyme	0.000151048	1.99892e-05	down	2.79284	-2.79284	-1.48173	150
Cellular Movement	cell movement	4.88e-22	Increased	2.454	EGR1	early growth response 1	Nucleus	transcription regulator	0.000910266	0.000531525	down	2.02311	-2.02311	-1.01658	150
Cellular Movement	cell movement	4.88e-22	Increased	2.454	ELF3	E74 like ETS transcription factor 3	Nucleus	transcription regulator	6.05334e-05	1.99347e-06	down	2.80437	-2.80437	-1.48768	150
Cellular Movement	cell movement	4.88e-22	Increased	2.454	ELK3	ELK3, ETS transcription factor	Nucleus	transcription regulator	0.00024621	5.1675e-05	up	2.23868	2.23868	1.16265	150
Cellular Movement	cell movement	4.88e-22	Increased	2.454	ENAH	enabled homolog (Drosophila)	Plasma Membrane	other	0.00010603	9.54714e-06	down	2.97451	-2.97451	-1.57265	150
Cellular Movement	cell movement	4.88e-22	Increased	2.454	EPHB1	EPH receptor B1	Plasma Membrane	kinase	0.0001348	1.60689e-05	up	2.30644	2.30644	1.20567	150
Cellular Movement	cell movement	4.88e-22	Increased	2.454	ETS1	ETS proto-oncogene 1, transcription factor	Nucleus	transcription regulator	0.000727446	0.000371116	up	2.14953	2.14953	1.10402	150
Cellular Movement	cell movement	4.88e-22	Increased	2.454	ETV5	ETS variant 5	Nucleus	transcription regulator	0.000287693	7.17426e-05	up	2.60151	2.60151	1.37935	150
Cellular Movement	cell movement	4.88e-22	Increased	2.454	F3	coagulation factor III, tissue factor	Plasma Membrane	transmembrane receptor	0.000167293	2.45862e-05	up	2.83358	2.83358	1.50263	150
Cellular Movement	cell movement	4.88e-22	Increased	2.454	FGF1	fibroblast growth factor 1	Extracellular Space	growth factor	0.000689416	0.000339749	up	2.7327	2.7327	1.45033	150
Cellular Movement	cell movement	4.88e-22	Increased	2.454	FGF5	fibroblast growth factor 5	Extracellular Space	growth factor	3.65159e-05	2.83522e-07	up	3.22383	3.22383	1.68878	150
Cellular Movement	cell movement	4.88e-22	Increased	2.454	FGFR2	fibroblast growth factor receptor 2	Plasma Membrane	kinase	0.000292993	7.4204e-05	down	4.45302	-4.45302	-2.15478	150
Cellular Movement	cell movement	4.88e-22	Increased	2.454	GAB1	GRB2 associated binding protein 1	Cytoplasm	kinase	0.000120758	1.28231e-05	down	2.38756	-2.38756	-1.25554	150
Cellular Movement	cell movement	4.88e-22	Increased	2.454	GAL3ST1	galactose-3-O-sulfotransferase 1	Cytoplasm	enzyme	7.01231e-05	3.15466e-06	down	2.06855	-2.06855	-1.04862	150
Cellular Movement	cell movement	4.88e-22	Increased	2.454	GDF15	growth differentiation factor 15	Extracellular Space	growth factor	0.00194823	0.00151467	up	2.20534	2.20534	1.141	150
Cellular Movement	cell movement	4.88e-22	Increased	2.454	GJB2	gap junction protein beta 2	Plasma Membrane	transporter	4.21674e-05	4.2607e-07	up	2.38678	2.38678	1.25507	150
Cellular Movement	cell movement	4.88e-22	Increased	2.454	GNG12	G protein subunit gamma 12	Plasma Membrane	enzyme	0.000320542	8.8399e-05	down	3.05299	-3.05299	-1.61022	150
Cellular Movement	cell movement	4.88e-22	Increased	2.454	GUCY1B3	guanylate cyclase 1, soluble, beta 3	Cytoplasm	enzyme	0.000294466	7.54152e-05	down	2.03253	-2.03253	-1.02328	150
Cellular Movement	cell movement	4.88e-22	Increased	2.454	HAS2	hyaluronan synthase 2	Plasma Membrane	enzyme	8.96643e-05	6.63704e-06	up	2.84304	2.84304	1.50743	150
Cellular Movement	cell movement	4.88e-22	Increased	2.454	HAVCR1	hepatitis A virus cellular receptor 1	Plasma Membrane	other	0.000114195	1.1129e-05	down	2.97561	-2.97561	-1.57319	150
Cellular Movement	cell movement	4.88e-22	Increased	2.454	HBEGF	heparin binding EGF like growth factor	Extracellular Space	growth factor	0.000324605	9.06211e-05	up	2.92802	2.92802	1.54993	150
Cellular Movement	cell movement	4.88e-22	Increased	2.454	HIPK2	homeodomain interacting protein kinase 2	Nucleus	kinase	4.76218e-05	8.20133e-07	down	3.90758	-3.90758	-1.96627	150
Cellular Movement	cell movement	4.88e-22	Increased	2.454	HMGA2	high mobility group AT-hook 2	Nucleus	enzyme	7.36928e-05	3.96405e-06	up	2.57121	2.57121	1.36245	150
Cellular Movement	cell movement	4.88e-22	Increased	2.454	HMOX1	heme oxygenase 1	Cytoplasm	enzyme	3.07978e-05	1.0198e-07	up	7.17615	7.17615	2.84321	150
Cellular Movement	cell movement	4.88e-22	Increased	2.454	ICAM1	intercellular adhesion molecule 1	Plasma Membrane	transmembrane receptor	4.25833e-05	4.82261e-07	up	4.88337	4.88337	2.28788	150
Cellular Movement	cell movement	4.88e-22	Increased	2.454	ID1	inhibitor of DNA binding 1, HLH protein	Nucleus	transcription regulator	6.27081e-05	2.40082e-06	down	2.32483	-2.32483	-1.21713	150
Cellular Movement	cell movement	4.88e-22	Increased	2.454	IGFBP3	insulin like growth factor binding protein 3	Extracellular Space	other	2.3646e-05	3.67681e-08	down	2.30432	-2.30432	-1.20434	150
Cellular Movement	cell movement	4.88e-22	Increased	2.454	IL6	interleukin 6	Extracellular Space	cytokine	3.65159e-05	2.68298e-07	up	2.78882	2.78882	1.47965	150
Cellular Movement	cell movement	4.88e-22	Increased	2.454	ILF3	interleukin enhancer binding factor 3	Nucleus	transcription regulator	4.25833e-05	4.81981e-07	down	2.13305	-2.13305	-1.09292	150
Cellular Movement	cell movement	4.88e-22	Increased	2.454	INHBA	inhibin beta A	Extracellular Space	growth factor	6.18657e-05	2.29577e-06	up	3.71771	3.71771	1.89441	150
Cellular Movement	cell movement	4.88e-22	Increased	2.454	ITGA2	integrin subunit alpha 2	Plasma Membrane	transmembrane receptor	0.000106124	9.61516e-06	up	4.46447	4.46447	2.15849	150
Cellular Movement	cell movement	4.88e-22	Increased	2.454	ITGB6	integrin subunit beta 6	Plasma Membrane	other	0.000220499	4.13446e-05	down	2.73909	-2.73909	-1.4537	150
Cellular Movement	cell movement	4.88e-22	Increased	2.454	KITLG	KIT ligand	Extracellular Space	growth factor	3.70634e-05	2.92673e-07	down	2.80656	-2.80656	-1.4888	150
Cellular Movement	cell movement	4.88e-22	Increased	2.454	KLF4	Kruppel-like factor 4 (gut)	Nucleus	transcription regulator	8.10095e-05	5.36545e-06	up	3.086	3.086	1.62574	150
Cellular Movement	cell movement	4.88e-22	Increased	2.454	LAMB3	laminin subunit beta 3	Extracellular Space	transporter	4.21995e-05	4.45304e-07	up	3.24474	3.24474	1.6981	150
Cellular Movement	cell movement	4.88e-22	Increased	2.454	LAMC2	laminin subunit gamma 2	Extracellular Space	other	4.99694e-05	1.06168e-06	up	2.58961	2.58961	1.37274	150
Cellular Movement	cell movement	4.88e-22	Increased	2.454	LCP1	lymphocyte cytosolic protein 1	Cytoplasm	other	0.000136714	1.65312e-05	up	3.16095	3.16095	1.66036	150
Cellular Movement	cell movement	4.88e-22	Increased	2.454	LITAF	lipopolysaccharide induced TNF factor	Nucleus	transcription regulator	5.71384e-05	1.65447e-06	down	2.76449	-2.76449	-1.46701	150
Cellular Movement	cell movement	4.88e-22	Increased	2.454	LRIG1	leucine-rich repeats and immunoglobulin like domains 1	Extracellular Space	other	0.000368078	0.000112928	up	2.6276	2.6276	1.39375	150
Cellular Movement	cell movement	4.88e-22	Increased	2.454	LTB	lymphotoxin beta	Extracellular Space	cytokine	0.000325041	9.10768e-05	up	3.23391	3.23391	1.69328	150
Cellular Movement	cell movement	4.88e-22	Increased	2.454	LY96	lymphocyte antigen 96	Plasma Membrane	transmembrane receptor	0.000399174	0.000129442	up	2.09875	2.09875	1.06953	150
Cellular Movement	cell movement	4.88e-22	Increased	2.454	MAP3K1	mitogen-activated protein kinase kinase kinase 1	Cytoplasm	kinase	0.000104164	9.08987e-06	down	2.99182	-2.99182	-1.58102	150
Cellular Movement	cell movement	4.88e-22	Increased	2.454	MAP4K4	mitogen-activated protein kinase kinase kinase kinase 4	Cytoplasm	kinase	0.000136555	1.64327e-05	up	2.15776	2.15776	1.10954	150
Cellular Movement	cell movement	4.88e-22	Increased	2.454	MAVS	mitochondrial antiviral signaling protein	Cytoplasm	other	0.001397	0.000996787	down	2.47268	-2.47268	-1.30607	150
Cellular Movement	cell movement	4.88e-22	Increased	2.454	MIR17HG	miR-17-92a-1 cluster host gene	Other	other	0.000810491	0.000443466	down	2.15606	-2.15606	-1.1084	150
Cellular Movement	cell movement	4.88e-22	Increased	2.454	MMP1	matrix metallopeptidase 1	Extracellular Space	peptidase	2.99009e-05	6.82824e-08	up	3.68258	3.68258	1.88072	150
Cellular Movement	cell movement	4.88e-22	Increased	2.454	MMP14	matrix metallopeptidase 14	Extracellular Space	peptidase	5.71384e-05	1.58188e-06	up	2.21198	2.21198	1.14534	150
Cellular Movement	cell movement	4.88e-22	Increased	2.454	MMP7	matrix metallopeptidase 7	Extracellular Space	peptidase	0.000324617	9.07357e-05	down	4.18581	-4.18581	-2.06551	150
Cellular Movement	cell movement	4.88e-22	Increased	2.454	MMP9	matrix metallopeptidase 9	Extracellular Space	peptidase	0.000105861	9.4402e-06	up	5.58648	5.58648	2.48194	150
Cellular Movement	cell movement	4.88e-22	Increased	2.454	MYO10	myosin X	Cytoplasm	other	0.000162608	2.2763e-05	up	3.21829	3.21829	1.68629	150
Cellular Movement	cell movement	4.88e-22	Increased	2.454	NCF2	neutrophil cytosolic factor 2	Cytoplasm	enzyme	0.000241371	4.9582e-05	up	2.83754	2.83754	1.50464	150
Cellular Movement	cell movement	4.88e-22	Increased	2.454	NDEL1	nudE neurodevelopment protein 1 like 1	Nucleus	other	9.02543e-05	6.7397e-06	up	2.10114	2.10114	1.07117	150
Cellular Movement	cell movement	4.88e-22	Increased	2.454	NLRP3	NLR family, pyrin domain containing 3	Cytoplasm	other	0.000235207	4.68615e-05	up	3.66524	3.66524	1.87391	150
Cellular Movement	cell movement	4.88e-22	Increased	2.454	NREP	neuronal regeneration related protein	Cytoplasm	other	3.0027e-05	9.59985e-08	down	2.03785	-2.03785	-1.02705	150
Cellular Movement	cell movement	4.88e-22	Increased	2.454	NRP2	neuropilin 2	Plasma Membrane	kinase	0.000805229	0.000439483	down	2.02262	-2.02262	-1.01622	150
Cellular Movement	cell movement	4.88e-22	Increased	2.454	NT5E	5'-nucleotidase ecto	Plasma Membrane	phosphatase	8.09449e-05	5.25908e-06	up	3.37637	3.37637	1.75547	150
Cellular Movement	cell movement	4.88e-22	Increased	2.454	P2RY2	purinergic receptor P2Y2	Plasma Membrane	G-protein coupled receptor	0.000285062	7.05316e-05	up	2.09703	2.09703	1.06835	150
Cellular Movement	cell movement	4.88e-22	Increased	2.454	PAPPA	pappalysin 1	Extracellular Space	peptidase	0.000596275	0.000262189	up	2.6645	2.6645	1.41387	150
Cellular Movement	cell movement	4.88e-22	Increased	2.454	PDCD1LG2	programmed cell death 1 ligand 2	Plasma Membrane	enzyme	8.09449e-05	5.28019e-06	up	3.84934	3.84934	1.94461	150
Cellular Movement	cell movement	4.88e-22	Increased	2.454	PDCL	phosducin like	Cytoplasm	enzyme	0.000408328	0.000135021	down	2.04215	-2.04215	-1.03009	150
Cellular Movement	cell movement	4.88e-22	Increased	2.454	PDE4DIP	phosphodiesterase 4D interacting protein	Cytoplasm	enzyme	0.00265385	0.00219068	up	2.03402	2.03402	1.02434	150
Cellular Movement	cell movement	4.88e-22	Increased	2.454	PELI1	pellino E3 ubiquitin protein ligase 1	Cytoplasm	enzyme	0.00158172	0.00117464	down	2.50182	-2.50182	-1.32298	150
Cellular Movement	cell movement	4.88e-22	Increased	2.454	PEX13	peroxisomal biogenesis factor 13	Cytoplasm	transporter	7.25781e-05	3.65497e-06	down	2.32362	-2.32362	-1.21637	150
Cellular Movement	cell movement	4.88e-22	Increased	2.454	PHB2	prohibitin 2	Cytoplasm	transcription regulator	8.50289e-05	5.93702e-06	down	2.19986	-2.19986	-1.13741	150
Cellular Movement	cell movement	4.88e-22	Increased	2.454	PHLDA1	pleckstrin homology like domain family A member 1	Cytoplasm	other	4.21674e-05	4.04011e-07	up	2.56874	2.56874	1.36106	150
Cellular Movement	cell movement	4.88e-22	Increased	2.454	PLA2G4A	phospholipase A2 group IVA	Cytoplasm	enzyme	0.000319621	8.78429e-05	up	2.0774	2.0774	1.05478	150
Cellular Movement	cell movement	4.88e-22	Increased	2.454	PLAT	plasminogen activator, tissue type	Extracellular Space	peptidase	0.000324331	9.0357e-05	up	2.93037	2.93037	1.55108	150
Cellular Movement	cell movement	4.88e-22	Increased	2.454	PLAU	plasminogen activator, urokinase	Extracellular Space	peptidase	7.29755e-05	3.74487e-06	up	4.08751	4.08751	2.03122	150
Cellular Movement	cell movement	4.88e-22	Increased	2.454	PLAUR	plasminogen activator, urokinase receptor	Plasma Membrane	transmembrane receptor	5.72628e-05	1.70817e-06	up	3.57375	3.57375	1.83744	150
Cellular Movement	cell movement	4.88e-22	Increased	2.454	PODXL	podocalyxin like	Plasma Membrane	kinase	6.8669e-05	2.89323e-06	up	2.31816	2.31816	1.21298	150
Cellular Movement	cell movement	4.88e-22	Increased	2.454	PPIA	peptidylprolyl isomerase A	Cytoplasm	enzyme	0.000213482	3.91661e-05	down	3.11421	-3.11421	-1.63887	150
Cellular Movement	cell movement	4.88e-22	Increased	2.454	PPIF	peptidylprolyl isomerase F	Cytoplasm	enzyme	0.000117299	1.19067e-05	up	2.2634	2.2634	1.17849	150
Cellular Movement	cell movement	4.88e-22	Increased	2.454	PROCR	protein C receptor	Plasma Membrane	other	4.80549e-05	8.55968e-07	down	2.18783	-2.18783	-1.1295	150
Cellular Movement	cell movement	4.88e-22	Increased	2.454	PTPRR	protein tyrosine phosphatase, receptor type R	Plasma Membrane	phosphatase	0.000304557	7.97384e-05	up	2.32023	2.32023	1.21427	150
Cellular Movement	cell movement	4.88e-22	Increased	2.454	PTX3	pentraxin 3	Extracellular Space	other	0.000292993	7.42705e-05	up	3.61367	3.61367	1.85347	150
Cellular Movement	cell movement	4.88e-22	Increased	2.454	RAB11FIP1	RAB11 family interacting protein 1	Cytoplasm	other	0.000464526	0.000170497	down	3.11373	-3.11373	-1.63864	150
Cellular Movement	cell movement	4.88e-22	Increased	2.454	RAP1A	RAP1A, member of RAS oncogene family	Cytoplasm	enzyme	5.67199e-05	1.48871e-06	up	2.16819	2.16819	1.11649	150
Cellular Movement	cell movement	4.88e-22	Increased	2.454	RCAN1	regulator of calcineurin 1	Nucleus	transcription regulator	7.03519e-05	3.19708e-06	up	2.17179	2.17179	1.11888	150
Cellular Movement	cell movement	4.88e-22	Increased	2.454	RGS3	regulator of G-protein signaling 3	Nucleus	other	0.00146999	0.00106616	up	2.21155	2.21155	1.14506	150
Cellular Movement	cell movement	4.88e-22	Increased	2.454	RGS4	regulator of G-protein signaling 4	Cytoplasm	other	4.9534e-05	9.97018e-07	up	2.89909	2.89909	1.5356	150
Cellular Movement	cell movement	4.88e-22	Increased	2.454	RHOB	ras homolog family member B	Cytoplasm	enzyme	6.81397e-05	2.79312e-06	down	3.93244	-3.93244	-1.97543	150
Cellular Movement	cell movement	4.88e-22	Increased	2.454	ROBO4	roundabout guidance receptor 4	Plasma Membrane	other	0.00240454	0.0019518	up	4.75767	4.75767	2.25026	150
Cellular Movement	cell movement	4.88e-22	Increased	2.454	RPS6KA5	ribosomal protein S6 kinase A5	Nucleus	kinase	0.000896053	0.000519236	up	2.57033	2.57033	1.36195	150
Cellular Movement	cell movement	4.88e-22	Increased	2.454	RPSA	ribosomal protein SA	Cytoplasm	translation regulator	4.9534e-05	1.00921e-06	up	4.16121	4.16121	2.057	150
Cellular Movement	cell movement	4.88e-22	Increased	2.454	RUFY3	RUN and FYVE domain containing 3	Plasma Membrane	other	9.42406e-05	7.47856e-06	down	2.03719	-2.03719	-1.02658	150
Cellular Movement	cell movement	4.88e-22	Increased	2.454	S1PR1	sphingosine-1-phosphate receptor 1	Plasma Membrane	G-protein coupled receptor	1.48349e-06	3.38774e-10	down	7.79723	-7.79723	-2.96296	150
Cellular Movement	cell movement	4.88e-22	Increased	2.454	SAA1	serum amyloid A1	Extracellular Space	transporter	7.47863e-05	4.10752e-06	up	2.96712	2.96712	1.56907	150
Cellular Movement	cell movement	4.88e-22	Increased	2.454	SEMA3A	semaphorin 3A	Extracellular Space	other	0.000519394	0.000207155	up	2.7446	2.7446	1.4566	150
Cellular Movement	cell movement	4.88e-22	Increased	2.454	SEMA3C	semaphorin 3C	Extracellular Space	other	7.89682e-05	4.88712e-06	up	2.25702	2.25702	1.17442	150
Cellular Movement	cell movement	4.88e-22	Increased	2.454	SEMA6A	semaphorin 6A	Plasma Membrane	transmembrane receptor	0.000689694	0.000340277	down	2.06704	-2.06704	-1.04756	150
Cellular Movement	cell movement	4.88e-22	Increased	2.454	SEMA6D	semaphorin 6D	Plasma Membrane	other	0.000594512	0.000260818	down	2.52299	-2.52299	-1.33513	150
Cellular Movement	cell movement	4.88e-22	Increased	2.454	SERP1	stress-associated endoplasmic reticulum protein 1	Cytoplasm	other	7.47863e-05	4.12444e-06	up	3.26233	3.26233	1.7059	150
Cellular Movement	cell movement	4.88e-22	Increased	2.454	SERPINB2	serpin family B member 2	Extracellular Space	other	0.00148016	0.00107657	up	4.30458	4.30458	2.10587	150
Cellular Movement	cell movement	4.88e-22	Increased	2.454	SERPIND1	serpin family D member 1	Extracellular Space	other	0.000730228	0.000373821	up	2.96837	2.96837	1.56967	150
Cellular Movement	cell movement	4.88e-22	Increased	2.454	SFRP4	secreted frizzled related protein 4	Plasma Membrane	transmembrane receptor	0.00117179	0.000782337	down	2.0725	-2.0725	-1.05137	150
Cellular Movement	cell movement	4.88e-22	Increased	2.454	SLC1A3	solute carrier family 1 member 3	Plasma Membrane	transporter	0.000666537	0.000319893	up	2.92206	2.92206	1.54699	150
Cellular Movement	cell movement	4.88e-22	Increased	2.454	SOD2	superoxide dismutase 2, mitochondrial	Cytoplasm	enzyme	5.71384e-05	1.58904e-06	up	2.2088	2.2088	1.14326	150
Cellular Movement	cell movement	4.88e-22	Increased	2.454	SP100	SP100 nuclear antigen	Nucleus	transcription regulator	0.000850382	0.00047736	up	2.11249	2.11249	1.07894	150
Cellular Movement	cell movement	4.88e-22	Increased	2.454	SPRY2	sprouty RTK signaling antagonist 2	Plasma Membrane	other	0.000410306	0.000136093	up	2.82721	2.82721	1.49938	150
Cellular Movement	cell movement	4.88e-22	Increased	2.454	STAT1	signal transducer and activator of transcription 1	Nucleus	transcription regulator	0.000127302	1.44319e-05	down	2.48387	-2.48387	-1.31259	150
Cellular Movement	cell movement	4.88e-22	Increased	2.454	STC1	stanniocalcin 1	Extracellular Space	kinase	0.000278723	6.72781e-05	up	2.19527	2.19527	1.1344	150
Cellular Movement	cell movement	4.88e-22	Increased	2.454	SWAP70	SWAP switching B-cell complex 70kDa subunit	Cytoplasm	other	5.71384e-05	1.62624e-06	down	2.19703	-2.19703	-1.13556	150
Cellular Movement	cell movement	4.88e-22	Increased	2.454	TAB2	TGF-beta activated kinase 1/MAP3K7 binding protein 2	Cytoplasm	other	7.07354e-05	3.22612e-06	down	2.16795	-2.16795	-1.11633	150
Cellular Movement	cell movement	4.88e-22	Increased	2.454	THBD	thrombomodulin	Plasma Membrane	transmembrane receptor	8.17504e-05	5.46994e-06	up	3.21574	3.21574	1.68515	150
Cellular Movement	cell movement	4.88e-22	Increased	2.454	THRB	thyroid hormone receptor beta	Nucleus	ligand-dependent nuclear receptor	0.000438312	0.000152593	down	3.65533	-3.65533	-1.87	150
Cellular Movement	cell movement	4.88e-22	Increased	2.454	TLR2	toll like receptor 2	Plasma Membrane	transmembrane receptor	8.09449e-05	5.23963e-06	up	4.16405	4.16405	2.05799	150
Cellular Movement	cell movement	4.88e-22	Increased	2.454	TNF	tumor necrosis factor	Extracellular Space	cytokine	0.000291147	7.31026e-05	up	2.74571	2.74571	1.45718	150
Cellular Movement	cell movement	4.88e-22	Increased	2.454	TNFAIP3	TNF alpha induced protein 3	Nucleus	enzyme	4.63841e-05	6.73483e-07	up	3.2656	3.2656	1.70735	150
Cellular Movement	cell movement	4.88e-22	Increased	2.454	TNFRSF19	tumor necrosis factor receptor superfamily member 19	Plasma Membrane	transmembrane receptor	7.83021e-05	4.53929e-06	down	3.32882	-3.32882	-1.73501	150
Cellular Movement	cell movement	4.88e-22	Increased	2.454	UCP2	uncoupling protein 2	Cytoplasm	transporter	0.000212663	3.87543e-05	down	2.04574	-2.04574	-1.03262	150
Cellular Movement	cell movement	4.88e-22	Increased	2.454	VAV3	vav guanine nucleotide exchange factor 3	Extracellular Space	cytokine	9.63321e-05	7.8327e-06	down	8.02289	-8.02289	-3.00412	150
Cellular Movement	cell movement	4.88e-22	Increased	2.454	VDR	vitamin D (1,25- dihydroxyvitamin D3) receptor	Nucleus	transcription regulator	0.000664155	0.000317745	up	3.17167	3.17167	1.66524	150
Cellular Movement	cell movement	4.88e-22	Increased	2.454	VEGFC	vascular endothelial growth factor C	Extracellular Space	growth factor	4.25833e-05	4.70028e-07	up	2.6596	2.6596	1.41121	150
Cellular Movement	cell movement	4.88e-22	Increased	2.454	WNT5A	Wnt family member 5A	Extracellular Space	cytokine	9.09658e-05	6.84293e-06	up	3.07702	3.07702	1.62154	150
Cellular Movement	cell movement	4.88e-22	Increased	2.454	XDH	xanthine dehydrogenase	Cytoplasm	enzyme	0.000240351	4.90388e-05	up	2.04405	2.04405	1.03143	150
Cellular Movement	cell movement of tumor cell lines	8.75e-22	Increased	2.4	ACKR3	atypical chemokine receptor 3	Plasma Membrane	G-protein coupled receptor	0.00018251	2.96362e-05	up	2.02777	2.02777	1.0199	86
Cellular Movement	cell movement of tumor cell lines	8.75e-22	Increased	2.4	AREG	amphiregulin	Extracellular Space	growth factor	0.00030687	8.06945e-05	up	2.63063	2.63063	1.39541	86
Cellular Movement	cell movement of tumor cell lines	8.75e-22	Increased	2.4	ARHGDIB	Rho GDP dissociation inhibitor beta	Cytoplasm	enzyme	6.05334e-05	1.96135e-06	up	3.30009	3.30009	1.7225	86
Cellular Movement	cell movement of tumor cell lines	8.75e-22	Increased	2.4	ARRDC3	arrestin domain containing 3	Plasma Membrane	other	0.000106882	9.78984e-06	down	2.06704	-2.06704	-1.04756	86
Cellular Movement	cell movement of tumor cell lines	8.75e-22	Increased	2.4	C3	complement component 3	Extracellular Space	peptidase	0.000166276	2.38974e-05	up	3.15758	3.15758	1.65882	86
Cellular Movement	cell movement of tumor cell lines	8.75e-22	Increased	2.4	CCL2	C-C motif chemokine ligand 2	Extracellular Space	cytokine	5.71384e-05	1.64325e-06	up	4.18932	4.18932	2.06672	86
Cellular Movement	cell movement of tumor cell lines	8.75e-22	Increased	2.4	CCL20	C-C motif chemokine ligand 20	Extracellular Space	cytokine	0.00012705	1.42377e-05	up	3.12207	3.12207	1.6425	86
Cellular Movement	cell movement of tumor cell lines	8.75e-22	Increased	2.4	CCL5	C-C motif chemokine ligand 5	Extracellular Space	cytokine	0.000244253	5.08419e-05	up	3.69923	3.69923	1.88723	86
Cellular Movement	cell movement of tumor cell lines	8.75e-22	Increased	2.4	CD40	CD40 molecule	Plasma Membrane	transmembrane receptor	9.69248e-05	8.01981e-06	up	2.53917	2.53917	1.34436	86
Cellular Movement	cell movement of tumor cell lines	8.75e-22	Increased	2.4	CD82	CD82 molecule	Plasma Membrane	other	0.000155574	2.11222e-05	up	2.66006	2.66006	1.41146	86
Cellular Movement	cell movement of tumor cell lines	8.75e-22	Increased	2.4	CDKN1A	cyclin-dependent kinase inhibitor 1A	Nucleus	kinase	0.000177018	2.76906e-05	up	2.34183	2.34183	1.22764	86
Cellular Movement	cell movement of tumor cell lines	8.75e-22	Increased	2.4	CSF2	colony stimulating factor 2	Extracellular Space	cytokine	0.000181511	2.91396e-05	up	3.2134	3.2134	1.6841	86
Cellular Movement	cell movement of tumor cell lines	8.75e-22	Increased	2.4	CXCL11	C-X-C motif chemokine ligand 11	Other	cytokine	0.000621227	0.000282085	up	2.52305	2.52305	1.33517	86
Cellular Movement	cell movement of tumor cell lines	8.75e-22	Increased	2.4	CXCL2	C-X-C motif chemokine ligand 2	Extracellular Space	cytokine	7.29755e-05	3.81133e-06	up	2.98142	2.98142	1.576	86
Cellular Movement	cell movement of tumor cell lines	8.75e-22	Increased	2.4	CXCL3	C-X-C motif chemokine ligand 3	Extracellular Space	cytokine	0.000453284	0.000162494	up	3.10131	3.10131	1.63288	86
Cellular Movement	cell movement of tumor cell lines	8.75e-22	Increased	2.4	CXCL5	C-X-C motif chemokine ligand 5	Extracellular Space	cytokine	0.000517835	0.000205801	up	2.85352	2.85352	1.51274	86
Cellular Movement	cell movement of tumor cell lines	8.75e-22	Increased	2.4	CXCL8	C-X-C motif chemokine ligand 8	Extracellular Space	cytokine	4.70395e-05	7.41202e-07	up	6.01014	6.01014	2.5874	86
Cellular Movement	cell movement of tumor cell lines	8.75e-22	Increased	2.4	DDX58	DEXD/H-box helicase 58	Cytoplasm	enzyme	7.88016e-05	4.63882e-06	up	2.39664	2.39664	1.26101	86
Cellular Movement	cell movement of tumor cell lines	8.75e-22	Increased	2.4	DNAJB6	DnaJ heat shock protein family (Hsp40) member B6	Nucleus	transcription regulator	4.56082e-05	6.29335e-07	up	2.6549	2.6549	1.40866	86
Cellular Movement	cell movement of tumor cell lines	8.75e-22	Increased	2.4	DOCK4	dedicator of cytokinesis 4	Plasma Membrane	other	3.0027e-05	8.92081e-08	up	3.29638	3.29638	1.72088	86
Cellular Movement	cell movement of tumor cell lines	8.75e-22	Increased	2.4	EGLN3	egl-9 family hypoxia-inducible factor 3	Cytoplasm	enzyme	0.000151048	1.99892e-05	down	2.79284	-2.79284	-1.48173	86
Cellular Movement	cell movement of tumor cell lines	8.75e-22	Increased	2.4	EGR1	early growth response 1	Nucleus	transcription regulator	0.000910266	0.000531525	down	2.02311	-2.02311	-1.01658	86
Cellular Movement	cell movement of tumor cell lines	8.75e-22	Increased	2.4	ENAH	enabled homolog (Drosophila)	Plasma Membrane	other	0.00010603	9.54714e-06	down	2.97451	-2.97451	-1.57265	86
Cellular Movement	cell movement of tumor cell lines	8.75e-22	Increased	2.4	EPHB1	EPH receptor B1	Plasma Membrane	kinase	0.0001348	1.60689e-05	up	2.30644	2.30644	1.20567	86
Cellular Movement	cell movement of tumor cell lines	8.75e-22	Increased	2.4	ETS1	ETS proto-oncogene 1, transcription factor	Nucleus	transcription regulator	0.000727446	0.000371116	up	2.14953	2.14953	1.10402	86
Cellular Movement	cell movement of tumor cell lines	8.75e-22	Increased	2.4	ETV5	ETS variant 5	Nucleus	transcription regulator	0.000287693	7.17426e-05	up	2.60151	2.60151	1.37935	86
Cellular Movement	cell movement of tumor cell lines	8.75e-22	Increased	2.4	F3	coagulation factor III, tissue factor	Plasma Membrane	transmembrane receptor	0.000167293	2.45862e-05	up	2.83358	2.83358	1.50263	86
Cellular Movement	cell movement of tumor cell lines	8.75e-22	Increased	2.4	FGF1	fibroblast growth factor 1	Extracellular Space	growth factor	0.000689416	0.000339749	up	2.7327	2.7327	1.45033	86
Cellular Movement	cell movement of tumor cell lines	8.75e-22	Increased	2.4	FGF5	fibroblast growth factor 5	Extracellular Space	growth factor	3.65159e-05	2.83522e-07	up	3.22383	3.22383	1.68878	86
Cellular Movement	cell movement of tumor cell lines	8.75e-22	Increased	2.4	FGFR2	fibroblast growth factor receptor 2	Plasma Membrane	kinase	0.000292993	7.4204e-05	down	4.45302	-4.45302	-2.15478	86
Cellular Movement	cell movement of tumor cell lines	8.75e-22	Increased	2.4	GAB1	GRB2 associated binding protein 1	Cytoplasm	kinase	0.000120758	1.28231e-05	down	2.38756	-2.38756	-1.25554	86
Cellular Movement	cell movement of tumor cell lines	8.75e-22	Increased	2.4	GDF15	growth differentiation factor 15	Extracellular Space	growth factor	0.00194823	0.00151467	up	2.20534	2.20534	1.141	86
Cellular Movement	cell movement of tumor cell lines	8.75e-22	Increased	2.4	HAS2	hyaluronan synthase 2	Plasma Membrane	enzyme	8.96643e-05	6.63704e-06	up	2.84304	2.84304	1.50743	86
Cellular Movement	cell movement of tumor cell lines	8.75e-22	Increased	2.4	HBEGF	heparin binding EGF like growth factor	Extracellular Space	growth factor	0.000324605	9.06211e-05	up	2.92802	2.92802	1.54993	86
Cellular Movement	cell movement of tumor cell lines	8.75e-22	Increased	2.4	HIPK2	homeodomain interacting protein kinase 2	Nucleus	kinase	4.76218e-05	8.20133e-07	down	3.90758	-3.90758	-1.96627	86
Cellular Movement	cell movement of tumor cell lines	8.75e-22	Increased	2.4	HMGA2	high mobility group AT-hook 2	Nucleus	enzyme	7.36928e-05	3.96405e-06	up	2.57121	2.57121	1.36245	86
Cellular Movement	cell movement of tumor cell lines	8.75e-22	Increased	2.4	HMOX1	heme oxygenase 1	Cytoplasm	enzyme	3.07978e-05	1.0198e-07	up	7.17615	7.17615	2.84321	86
Cellular Movement	cell movement of tumor cell lines	8.75e-22	Increased	2.4	ID1	inhibitor of DNA binding 1, HLH protein	Nucleus	transcription regulator	6.27081e-05	2.40082e-06	down	2.32483	-2.32483	-1.21713	86
Cellular Movement	cell movement of tumor cell lines	8.75e-22	Increased	2.4	IGFBP3	insulin like growth factor binding protein 3	Extracellular Space	other	2.3646e-05	3.67681e-08	down	2.30432	-2.30432	-1.20434	86
Cellular Movement	cell movement of tumor cell lines	8.75e-22	Increased	2.4	IL6	interleukin 6	Extracellular Space	cytokine	3.65159e-05	2.68298e-07	up	2.78882	2.78882	1.47965	86
Cellular Movement	cell movement of tumor cell lines	8.75e-22	Increased	2.4	ILF3	interleukin enhancer binding factor 3	Nucleus	transcription regulator	4.25833e-05	4.81981e-07	down	2.13305	-2.13305	-1.09292	86
Cellular Movement	cell movement of tumor cell lines	8.75e-22	Increased	2.4	ITGA2	integrin subunit alpha 2	Plasma Membrane	transmembrane receptor	0.000106124	9.61516e-06	up	4.46447	4.46447	2.15849	86
Cellular Movement	cell movement of tumor cell lines	8.75e-22	Increased	2.4	ITGB6	integrin subunit beta 6	Plasma Membrane	other	0.000220499	4.13446e-05	down	2.73909	-2.73909	-1.4537	86
Cellular Movement	cell movement of tumor cell lines	8.75e-22	Increased	2.4	KITLG	KIT ligand	Extracellular Space	growth factor	3.70634e-05	2.92673e-07	down	2.80656	-2.80656	-1.4888	86
Cellular Movement	cell movement of tumor cell lines	8.75e-22	Increased	2.4	KLF4	Kruppel-like factor 4 (gut)	Nucleus	transcription regulator	8.10095e-05	5.36545e-06	up	3.086	3.086	1.62574	86
Cellular Movement	cell movement of tumor cell lines	8.75e-22	Increased	2.4	LAMB3	laminin subunit beta 3	Extracellular Space	transporter	4.21995e-05	4.45304e-07	up	3.24474	3.24474	1.6981	86
Cellular Movement	cell movement of tumor cell lines	8.75e-22	Increased	2.4	LAMC2	laminin subunit gamma 2	Extracellular Space	other	4.99694e-05	1.06168e-06	up	2.58961	2.58961	1.37274	86
Cellular Movement	cell movement of tumor cell lines	8.75e-22	Increased	2.4	LCP1	lymphocyte cytosolic protein 1	Cytoplasm	other	0.000136714	1.65312e-05	up	3.16095	3.16095	1.66036	86
Cellular Movement	cell movement of tumor cell lines	8.75e-22	Increased	2.4	LRIG1	leucine-rich repeats and immunoglobulin like domains 1	Extracellular Space	other	0.000368078	0.000112928	up	2.6276	2.6276	1.39375	86
Cellular Movement	cell movement of tumor cell lines	8.75e-22	Increased	2.4	MAP3K1	mitogen-activated protein kinase kinase kinase 1	Cytoplasm	kinase	0.000104164	9.08987e-06	down	2.99182	-2.99182	-1.58102	86
Cellular Movement	cell movement of tumor cell lines	8.75e-22	Increased	2.4	MAP4K4	mitogen-activated protein kinase kinase kinase kinase 4	Cytoplasm	kinase	0.000136555	1.64327e-05	up	2.15776	2.15776	1.10954	86
Cellular Movement	cell movement of tumor cell lines	8.75e-22	Increased	2.4	MMP1	matrix metallopeptidase 1	Extracellular Space	peptidase	2.99009e-05	6.82824e-08	up	3.68258	3.68258	1.88072	86
Cellular Movement	cell movement of tumor cell lines	8.75e-22	Increased	2.4	MMP14	matrix metallopeptidase 14	Extracellular Space	peptidase	5.71384e-05	1.58188e-06	up	2.21198	2.21198	1.14534	86
Cellular Movement	cell movement of tumor cell lines	8.75e-22	Increased	2.4	MMP7	matrix metallopeptidase 7	Extracellular Space	peptidase	0.000324617	9.07357e-05	down	4.18581	-4.18581	-2.06551	86
Cellular Movement	cell movement of tumor cell lines	8.75e-22	Increased	2.4	MMP9	matrix metallopeptidase 9	Extracellular Space	peptidase	0.000105861	9.4402e-06	up	5.58648	5.58648	2.48194	86
Cellular Movement	cell movement of tumor cell lines	8.75e-22	Increased	2.4	MYO10	myosin X	Cytoplasm	other	0.000162608	2.2763e-05	up	3.21829	3.21829	1.68629	86
Cellular Movement	cell movement of tumor cell lines	8.75e-22	Increased	2.4	NREP	neuronal regeneration related protein	Cytoplasm	other	3.0027e-05	9.59985e-08	down	2.03785	-2.03785	-1.02705	86
Cellular Movement	cell movement of tumor cell lines	8.75e-22	Increased	2.4	NRP2	neuropilin 2	Plasma Membrane	kinase	0.000805229	0.000439483	down	2.02262	-2.02262	-1.01622	86
Cellular Movement	cell movement of tumor cell lines	8.75e-22	Increased	2.4	P2RY2	purinergic receptor P2Y2	Plasma Membrane	G-protein coupled receptor	0.000285062	7.05316e-05	up	2.09703	2.09703	1.06835	86
Cellular Movement	cell movement of tumor cell lines	8.75e-22	Increased	2.4	PHB2	prohibitin 2	Cytoplasm	transcription regulator	8.50289e-05	5.93702e-06	down	2.19986	-2.19986	-1.13741	86
Cellular Movement	cell movement of tumor cell lines	8.75e-22	Increased	2.4	PHLDA1	pleckstrin homology like domain family A member 1	Cytoplasm	other	4.21674e-05	4.04011e-07	up	2.56874	2.56874	1.36106	86
Cellular Movement	cell movement of tumor cell lines	8.75e-22	Increased	2.4	PLAT	plasminogen activator, tissue type	Extracellular Space	peptidase	0.000324331	9.0357e-05	up	2.93037	2.93037	1.55108	86
Cellular Movement	cell movement of tumor cell lines	8.75e-22	Increased	2.4	PLAU	plasminogen activator, urokinase	Extracellular Space	peptidase	7.29755e-05	3.74487e-06	up	4.08751	4.08751	2.03122	86
Cellular Movement	cell movement of tumor cell lines	8.75e-22	Increased	2.4	PLAUR	plasminogen activator, urokinase receptor	Plasma Membrane	transmembrane receptor	5.72628e-05	1.70817e-06	up	3.57375	3.57375	1.83744	86
Cellular Movement	cell movement of tumor cell lines	8.75e-22	Increased	2.4	PODXL	podocalyxin like	Plasma Membrane	kinase	6.8669e-05	2.89323e-06	up	2.31816	2.31816	1.21298	86
Cellular Movement	cell movement of tumor cell lines	8.75e-22	Increased	2.4	PPIA	peptidylprolyl isomerase A	Cytoplasm	enzyme	0.000213482	3.91661e-05	down	3.11421	-3.11421	-1.63887	86
Cellular Movement	cell movement of tumor cell lines	8.75e-22	Increased	2.4	PPIF	peptidylprolyl isomerase F	Cytoplasm	enzyme	0.000117299	1.19067e-05	up	2.2634	2.2634	1.17849	86
Cellular Movement	cell movement of tumor cell lines	8.75e-22	Increased	2.4	RAB11FIP1	RAB11 family interacting protein 1	Cytoplasm	other	0.000464526	0.000170497	down	3.11373	-3.11373	-1.63864	86
Cellular Movement	cell movement of tumor cell lines	8.75e-22	Increased	2.4	RAP1A	RAP1A, member of RAS oncogene family	Cytoplasm	enzyme	5.67199e-05	1.48871e-06	up	2.16819	2.16819	1.11649	86
Cellular Movement	cell movement of tumor cell lines	8.75e-22	Increased	2.4	RGS3	regulator of G-protein signaling 3	Nucleus	other	0.00146999	0.00106616	up	2.21155	2.21155	1.14506	86
Cellular Movement	cell movement of tumor cell lines	8.75e-22	Increased	2.4	RHOB	ras homolog family member B	Cytoplasm	enzyme	6.81397e-05	2.79312e-06	down	3.93244	-3.93244	-1.97543	86
Cellular Movement	cell movement of tumor cell lines	8.75e-22	Increased	2.4	RPS6KA5	ribosomal protein S6 kinase A5	Nucleus	kinase	0.000896053	0.000519236	up	2.57033	2.57033	1.36195	86
Cellular Movement	cell movement of tumor cell lines	8.75e-22	Increased	2.4	S1PR1	sphingosine-1-phosphate receptor 1	Plasma Membrane	G-protein coupled receptor	1.48349e-06	3.38774e-10	down	7.79723	-7.79723	-2.96296	86
Cellular Movement	cell movement of tumor cell lines	8.75e-22	Increased	2.4	SEMA3A	semaphorin 3A	Extracellular Space	other	0.000519394	0.000207155	up	2.7446	2.7446	1.4566	86
Cellular Movement	cell movement of tumor cell lines	8.75e-22	Increased	2.4	SFRP4	secreted frizzled related protein 4	Plasma Membrane	transmembrane receptor	0.00117179	0.000782337	down	2.0725	-2.0725	-1.05137	86
Cellular Movement	cell movement of tumor cell lines	8.75e-22	Increased	2.4	SOD2	superoxide dismutase 2, mitochondrial	Cytoplasm	enzyme	5.71384e-05	1.58904e-06	up	2.2088	2.2088	1.14326	86
Cellular Movement	cell movement of tumor cell lines	8.75e-22	Increased	2.4	SPRY2	sprouty RTK signaling antagonist 2	Plasma Membrane	other	0.000410306	0.000136093	up	2.82721	2.82721	1.49938	86
Cellular Movement	cell movement of tumor cell lines	8.75e-22	Increased	2.4	STAT1	signal transducer and activator of transcription 1	Nucleus	transcription regulator	0.000127302	1.44319e-05	down	2.48387	-2.48387	-1.31259	86
Cellular Movement	cell movement of tumor cell lines	8.75e-22	Increased	2.4	THBD	thrombomodulin	Plasma Membrane	transmembrane receptor	8.17504e-05	5.46994e-06	up	3.21574	3.21574	1.68515	86
Cellular Movement	cell movement of tumor cell lines	8.75e-22	Increased	2.4	THRB	thyroid hormone receptor beta	Nucleus	ligand-dependent nuclear receptor	0.000438312	0.000152593	down	3.65533	-3.65533	-1.87	86
Cellular Movement	cell movement of tumor cell lines	8.75e-22	Increased	2.4	TLR2	toll like receptor 2	Plasma Membrane	transmembrane receptor	8.09449e-05	5.23963e-06	up	4.16405	4.16405	2.05799	86
Cellular Movement	cell movement of tumor cell lines	8.75e-22	Increased	2.4	TNF	tumor necrosis factor	Extracellular Space	cytokine	0.000291147	7.31026e-05	up	2.74571	2.74571	1.45718	86
Cellular Movement	cell movement of tumor cell lines	8.75e-22	Increased	2.4	VAV3	vav guanine nucleotide exchange factor 3	Extracellular Space	cytokine	9.63321e-05	7.8327e-06	down	8.02289	-8.02289	-3.00412	86
Cellular Movement	cell movement of tumor cell lines	8.75e-22	Increased	2.4	VEGFC	vascular endothelial growth factor C	Extracellular Space	growth factor	4.25833e-05	4.70028e-07	up	2.6596	2.6596	1.41121	86
Cellular Movement	cell movement of tumor cell lines	8.75e-22	Increased	2.4	WNT5A	Wnt family member 5A	Extracellular Space	cytokine	9.09658e-05	6.84293e-06	up	3.07702	3.07702	1.62154	86
Cellular Movement	cell movement of tumor cell lines	8.75e-22	Increased	2.4	XDH	xanthine dehydrogenase	Cytoplasm	enzyme	0.000240351	4.90388e-05	up	2.04405	2.04405	1.03143	86
Cardiovascular System Development and Function, Organismal Development	vasculogenesis	5.3e-21	Increased	2.458	AIMP1	aminoacyl tRNA synthetase complex-interacting multifunctional protein 1	Extracellular Space	cytokine	0.00061013	0.000272183	down	2.17524	-2.17524	-1.12117	77
Cardiovascular System Development and Function, Organismal Development	vasculogenesis	5.3e-21	Increased	2.458	ARHGAP22	Rho GTPase activating protein 22	Cytoplasm	other	4.21995e-05	4.57747e-07	up	2.59293	2.59293	1.37458	77
Cardiovascular System Development and Function, Organismal Development	vasculogenesis	5.3e-21	Increased	2.458	BMPER	BMP binding endothelial regulator	Extracellular Space	other	0.000275311	6.53595e-05	up	4.43084	4.43084	2.14758	77
Cardiovascular System Development and Function, Organismal Development	vasculogenesis	5.3e-21	Increased	2.458	C3	complement component 3	Extracellular Space	peptidase	0.000166276	2.38974e-05	up	3.15758	3.15758	1.65882	77
Cardiovascular System Development and Function, Organismal Development	vasculogenesis	5.3e-21	Increased	2.458	CAV2	caveolin 2	Plasma Membrane	other	0.000299487	7.77613e-05	down	2.2358	-2.2358	-1.16079	77
Cardiovascular System Development and Function, Organismal Development	vasculogenesis	5.3e-21	Increased	2.458	CCL2	C-C motif chemokine ligand 2	Extracellular Space	cytokine	5.71384e-05	1.64325e-06	up	4.18932	4.18932	2.06672	77
Cardiovascular System Development and Function, Organismal Development	vasculogenesis	5.3e-21	Increased	2.458	CD40	CD40 molecule	Plasma Membrane	transmembrane receptor	9.69248e-05	8.01981e-06	up	2.53917	2.53917	1.34436	77
Cardiovascular System Development and Function, Organismal Development	vasculogenesis	5.3e-21	Increased	2.458	CDKN1A	cyclin-dependent kinase inhibitor 1A	Nucleus	kinase	0.000177018	2.76906e-05	up	2.34183	2.34183	1.22764	77
Cardiovascular System Development and Function, Organismal Development	vasculogenesis	5.3e-21	Increased	2.458	COL13A1	collagen type XIII alpha 1	Plasma Membrane	other	0.000438312	0.000152549	up	2.00617	2.00617	1.00444	77
Cardiovascular System Development and Function, Organismal Development	vasculogenesis	5.3e-21	Increased	2.458	CSF2	colony stimulating factor 2	Extracellular Space	cytokine	0.000181511	2.91396e-05	up	3.2134	3.2134	1.6841	77
Cardiovascular System Development and Function, Organismal Development	vasculogenesis	5.3e-21	Increased	2.458	CXCL1	C-X-C motif chemokine ligand 1	Extracellular Space	cytokine	7.2018e-05	3.46222e-06	up	2.66667	2.66667	1.41504	77
Cardiovascular System Development and Function, Organismal Development	vasculogenesis	5.3e-21	Increased	2.458	CXCL2	C-X-C motif chemokine ligand 2	Extracellular Space	cytokine	7.29755e-05	3.81133e-06	up	2.98142	2.98142	1.576	77
Cardiovascular System Development and Function, Organismal Development	vasculogenesis	5.3e-21	Increased	2.458	CXCL8	C-X-C motif chemokine ligand 8	Extracellular Space	cytokine	4.70395e-05	7.41202e-07	up	6.01014	6.01014	2.5874	77
Cardiovascular System Development and Function, Organismal Development	vasculogenesis	5.3e-21	Increased	2.458	CYLD	CYLD lysine 63 deubiquitinase	Nucleus	transcription regulator	5.67199e-05	1.53037e-06	up	2.37536	2.37536	1.24815	77
Cardiovascular System Development and Function, Organismal Development	vasculogenesis	5.3e-21	Increased	2.458	ECE1	endothelin converting enzyme 1	Plasma Membrane	peptidase	0.000147862	1.93143e-05	up	2.01302	2.01302	1.00936	77
Cardiovascular System Development and Function, Organismal Development	vasculogenesis	5.3e-21	Increased	2.458	EGLN3	egl-9 family hypoxia-inducible factor 3	Cytoplasm	enzyme	0.000151048	1.99892e-05	down	2.79284	-2.79284	-1.48173	77
Cardiovascular System Development and Function, Organismal Development	vasculogenesis	5.3e-21	Increased	2.458	EGR1	early growth response 1	Nucleus	transcription regulator	0.000910266	0.000531525	down	2.02311	-2.02311	-1.01658	77
Cardiovascular System Development and Function, Organismal Development	vasculogenesis	5.3e-21	Increased	2.458	ETS1	ETS proto-oncogene 1, transcription factor	Nucleus	transcription regulator	0.000727446	0.000371116	up	2.14953	2.14953	1.10402	77
Cardiovascular System Development and Function, Organismal Development	vasculogenesis	5.3e-21	Increased	2.458	F3	coagulation factor III, tissue factor	Plasma Membrane	transmembrane receptor	0.000167293	2.45862e-05	up	2.83358	2.83358	1.50263	77
Cardiovascular System Development and Function, Organismal Development	vasculogenesis	5.3e-21	Increased	2.458	FGF1	fibroblast growth factor 1	Extracellular Space	growth factor	0.000689416	0.000339749	up	2.7327	2.7327	1.45033	77
Cardiovascular System Development and Function, Organismal Development	vasculogenesis	5.3e-21	Increased	2.458	FGF5	fibroblast growth factor 5	Extracellular Space	growth factor	3.65159e-05	2.83522e-07	up	3.22383	3.22383	1.68878	77
Cardiovascular System Development and Function, Organismal Development	vasculogenesis	5.3e-21	Increased	2.458	FGFR2	fibroblast growth factor receptor 2	Plasma Membrane	kinase	0.000292993	7.4204e-05	down	4.45302	-4.45302	-2.15478	77
Cardiovascular System Development and Function, Organismal Development	vasculogenesis	5.3e-21	Increased	2.458	GAB1	GRB2 associated binding protein 1	Cytoplasm	kinase	0.000120758	1.28231e-05	down	2.38756	-2.38756	-1.25554	77
Cardiovascular System Development and Function, Organismal Development	vasculogenesis	5.3e-21	Increased	2.458	GEM	GTP binding protein overexpressed in skeletal muscle	Plasma Membrane	enzyme	0.000122297	1.31545e-05	up	2.14791	2.14791	1.10294	77
Cardiovascular System Development and Function, Organismal Development	vasculogenesis	5.3e-21	Increased	2.458	HAS2	hyaluronan synthase 2	Plasma Membrane	enzyme	8.96643e-05	6.63704e-06	up	2.84304	2.84304	1.50743	77
Cardiovascular System Development and Function, Organismal Development	vasculogenesis	5.3e-21	Increased	2.458	HBEGF	heparin binding EGF like growth factor	Extracellular Space	growth factor	0.000324605	9.06211e-05	up	2.92802	2.92802	1.54993	77
Cardiovascular System Development and Function, Organismal Development	vasculogenesis	5.3e-21	Increased	2.458	HIPK2	homeodomain interacting protein kinase 2	Nucleus	kinase	4.76218e-05	8.20133e-07	down	3.90758	-3.90758	-1.96627	77
Cardiovascular System Development and Function, Organismal Development	vasculogenesis	5.3e-21	Increased	2.458	HMOX1	heme oxygenase 1	Cytoplasm	enzyme	3.07978e-05	1.0198e-07	up	7.17615	7.17615	2.84321	77
Cardiovascular System Development and Function, Organismal Development	vasculogenesis	5.3e-21	Increased	2.458	HOXA13	homeobox A13	Nucleus	transcription regulator	0.000455334	0.000163773	down	2.37492	-2.37492	-1.24788	77
Cardiovascular System Development and Function, Organismal Development	vasculogenesis	5.3e-21	Increased	2.458	ICAM1	intercellular adhesion molecule 1	Plasma Membrane	transmembrane receptor	4.25833e-05	4.82261e-07	up	4.88337	4.88337	2.28788	77
Cardiovascular System Development and Function, Organismal Development	vasculogenesis	5.3e-21	Increased	2.458	ID1	inhibitor of DNA binding 1, HLH protein	Nucleus	transcription regulator	6.27081e-05	2.40082e-06	down	2.32483	-2.32483	-1.21713	77
Cardiovascular System Development and Function, Organismal Development	vasculogenesis	5.3e-21	Increased	2.458	IGFBP3	insulin like growth factor binding protein 3	Extracellular Space	other	2.3646e-05	3.67681e-08	down	2.30432	-2.30432	-1.20434	77
Cardiovascular System Development and Function, Organismal Development	vasculogenesis	5.3e-21	Increased	2.458	IL6	interleukin 6	Extracellular Space	cytokine	3.65159e-05	2.68298e-07	up	2.78882	2.78882	1.47965	77
Cardiovascular System Development and Function, Organismal Development	vasculogenesis	5.3e-21	Increased	2.458	INHBA	inhibin beta A	Extracellular Space	growth factor	6.18657e-05	2.29577e-06	up	3.71771	3.71771	1.89441	77
Cardiovascular System Development and Function, Organismal Development	vasculogenesis	5.3e-21	Increased	2.458	ITGA2	integrin subunit alpha 2	Plasma Membrane	transmembrane receptor	0.000106124	9.61516e-06	up	4.46447	4.46447	2.15849	77
Cardiovascular System Development and Function, Organismal Development	vasculogenesis	5.3e-21	Increased	2.458	KITLG	KIT ligand	Extracellular Space	growth factor	3.70634e-05	2.92673e-07	down	2.80656	-2.80656	-1.4888	77
Cardiovascular System Development and Function, Organismal Development	vasculogenesis	5.3e-21	Increased	2.458	MIR17HG	miR-17-92a-1 cluster host gene	Other	other	0.000810491	0.000443466	down	2.15606	-2.15606	-1.1084	77
Cardiovascular System Development and Function, Organismal Development	vasculogenesis	5.3e-21	Increased	2.458	MMP1	matrix metallopeptidase 1	Extracellular Space	peptidase	2.99009e-05	6.82824e-08	up	3.68258	3.68258	1.88072	77
Cardiovascular System Development and Function, Organismal Development	vasculogenesis	5.3e-21	Increased	2.458	MMP14	matrix metallopeptidase 14	Extracellular Space	peptidase	5.71384e-05	1.58188e-06	up	2.21198	2.21198	1.14534	77
Cardiovascular System Development and Function, Organismal Development	vasculogenesis	5.3e-21	Increased	2.458	MMP7	matrix metallopeptidase 7	Extracellular Space	peptidase	0.000324617	9.07357e-05	down	4.18581	-4.18581	-2.06551	77
Cardiovascular System Development and Function, Organismal Development	vasculogenesis	5.3e-21	Increased	2.458	MMP9	matrix metallopeptidase 9	Extracellular Space	peptidase	0.000105861	9.4402e-06	up	5.58648	5.58648	2.48194	77
Cardiovascular System Development and Function, Organismal Development	vasculogenesis	5.3e-21	Increased	2.458	NRP2	neuropilin 2	Plasma Membrane	kinase	0.000805229	0.000439483	down	2.02262	-2.02262	-1.01622	77
Cardiovascular System Development and Function, Organismal Development	vasculogenesis	5.3e-21	Increased	2.458	PAPPA	pappalysin 1	Extracellular Space	peptidase	0.000596275	0.000262189	up	2.6645	2.6645	1.41387	77
Cardiovascular System Development and Function, Organismal Development	vasculogenesis	5.3e-21	Increased	2.458	PCSK5	proprotein convertase subtilisin/kexin type 5	Extracellular Space	peptidase	6.83344e-05	2.83433e-06	down	2.0834	-2.0834	-1.05894	77
Cardiovascular System Development and Function, Organismal Development	vasculogenesis	5.3e-21	Increased	2.458	PDZK1	PDZ domain containing 1	Plasma Membrane	transporter	3.59123e-05	1.64283e-07	down	4.64588	-4.64588	-2.21595	77
Cardiovascular System Development and Function, Organismal Development	vasculogenesis	5.3e-21	Increased	2.458	PLA2G4A	phospholipase A2 group IVA	Cytoplasm	enzyme	0.000319621	8.78429e-05	up	2.0774	2.0774	1.05478	77
Cardiovascular System Development and Function, Organismal Development	vasculogenesis	5.3e-21	Increased	2.458	PLAT	plasminogen activator, tissue type	Extracellular Space	peptidase	0.000324331	9.0357e-05	up	2.93037	2.93037	1.55108	77
Cardiovascular System Development and Function, Organismal Development	vasculogenesis	5.3e-21	Increased	2.458	PLAU	plasminogen activator, urokinase	Extracellular Space	peptidase	7.29755e-05	3.74487e-06	up	4.08751	4.08751	2.03122	77
Cardiovascular System Development and Function, Organismal Development	vasculogenesis	5.3e-21	Increased	2.458	PLAUR	plasminogen activator, urokinase receptor	Plasma Membrane	transmembrane receptor	5.72628e-05	1.70817e-06	up	3.57375	3.57375	1.83744	77
Cardiovascular System Development and Function, Organismal Development	vasculogenesis	5.3e-21	Increased	2.458	PPIA	peptidylprolyl isomerase A	Cytoplasm	enzyme	0.000213482	3.91661e-05	down	3.11421	-3.11421	-1.63887	77
Cardiovascular System Development and Function, Organismal Development	vasculogenesis	5.3e-21	Increased	2.458	PRKAA1	protein kinase AMP-activated catalytic subunit alpha 1	Cytoplasm	kinase	0.00048552	0.000183941	down	2.44451	-2.44451	-1.28954	77
Cardiovascular System Development and Function, Organismal Development	vasculogenesis	5.3e-21	Increased	2.458	PROCR	protein C receptor	Plasma Membrane	other	4.80549e-05	8.55968e-07	down	2.18783	-2.18783	-1.1295	77
Cardiovascular System Development and Function, Organismal Development	vasculogenesis	5.3e-21	Increased	2.458	PTGER2	prostaglandin E receptor 2	Plasma Membrane	G-protein coupled receptor	0.000252601	5.47139e-05	down	2.17697	-2.17697	-1.12232	77
Cardiovascular System Development and Function, Organismal Development	vasculogenesis	5.3e-21	Increased	2.458	PTX3	pentraxin 3	Extracellular Space	other	0.000292993	7.42705e-05	up	3.61367	3.61367	1.85347	77
Cardiovascular System Development and Function, Organismal Development	vasculogenesis	5.3e-21	Increased	2.458	RAP1A	RAP1A, member of RAS oncogene family	Cytoplasm	enzyme	5.67199e-05	1.48871e-06	up	2.16819	2.16819	1.11649	77
Cardiovascular System Development and Function, Organismal Development	vasculogenesis	5.3e-21	Increased	2.458	RASA3	RAS p21 protein activator 3	Plasma Membrane	ion channel	8.48538e-05	5.86167e-06	up	2.52339	2.52339	1.33536	77
Cardiovascular System Development and Function, Organismal Development	vasculogenesis	5.3e-21	Increased	2.458	RCAN1	regulator of calcineurin 1	Nucleus	transcription regulator	7.03519e-05	3.19708e-06	up	2.17179	2.17179	1.11888	77
Cardiovascular System Development and Function, Organismal Development	vasculogenesis	5.3e-21	Increased	2.458	RGS4	regulator of G-protein signaling 4	Cytoplasm	other	4.9534e-05	9.97018e-07	up	2.89909	2.89909	1.5356	77
Cardiovascular System Development and Function, Organismal Development	vasculogenesis	5.3e-21	Increased	2.458	RHOB	ras homolog family member B	Cytoplasm	enzyme	6.81397e-05	2.79312e-06	down	3.93244	-3.93244	-1.97543	77
Cardiovascular System Development and Function, Organismal Development	vasculogenesis	5.3e-21	Increased	2.458	ROBO4	roundabout guidance receptor 4	Plasma Membrane	other	0.00240454	0.0019518	up	4.75767	4.75767	2.25026	77
Cardiovascular System Development and Function, Organismal Development	vasculogenesis	5.3e-21	Increased	2.458	S1PR1	sphingosine-1-phosphate receptor 1	Plasma Membrane	G-protein coupled receptor	1.48349e-06	3.38774e-10	down	7.79723	-7.79723	-2.96296	77
Cardiovascular System Development and Function, Organismal Development	vasculogenesis	5.3e-21	Increased	2.458	SAA1	serum amyloid A1	Extracellular Space	transporter	7.47863e-05	4.10752e-06	up	2.96712	2.96712	1.56907	77
Cardiovascular System Development and Function, Organismal Development	vasculogenesis	5.3e-21	Increased	2.458	SEMA3A	semaphorin 3A	Extracellular Space	other	0.000519394	0.000207155	up	2.7446	2.7446	1.4566	77
Cardiovascular System Development and Function, Organismal Development	vasculogenesis	5.3e-21	Increased	2.458	SEMA3C	semaphorin 3C	Extracellular Space	other	7.89682e-05	4.88712e-06	up	2.25702	2.25702	1.17442	77
Cardiovascular System Development and Function, Organismal Development	vasculogenesis	5.3e-21	Increased	2.458	SEMA6A	semaphorin 6A	Plasma Membrane	transmembrane receptor	0.000689694	0.000340277	down	2.06704	-2.06704	-1.04756	77
Cardiovascular System Development and Function, Organismal Development	vasculogenesis	5.3e-21	Increased	2.458	SERPIND1	serpin family D member 1	Extracellular Space	other	0.000730228	0.000373821	up	2.96837	2.96837	1.56967	77
Cardiovascular System Development and Function, Organismal Development	vasculogenesis	5.3e-21	Increased	2.458	SPRY2	sprouty RTK signaling antagonist 2	Plasma Membrane	other	0.000410306	0.000136093	up	2.82721	2.82721	1.49938	77
Cardiovascular System Development and Function, Organismal Development	vasculogenesis	5.3e-21	Increased	2.458	STAT1	signal transducer and activator of transcription 1	Nucleus	transcription regulator	0.000127302	1.44319e-05	down	2.48387	-2.48387	-1.31259	77
Cardiovascular System Development and Function, Organismal Development	vasculogenesis	5.3e-21	Increased	2.458	STC1	stanniocalcin 1	Extracellular Space	kinase	0.000278723	6.72781e-05	up	2.19527	2.19527	1.1344	77
Cardiovascular System Development and Function, Organismal Development	vasculogenesis	5.3e-21	Increased	2.458	TAB2	TGF-beta activated kinase 1/MAP3K7 binding protein 2	Cytoplasm	other	7.07354e-05	3.22612e-06	down	2.16795	-2.16795	-1.11633	77
Cardiovascular System Development and Function, Organismal Development	vasculogenesis	5.3e-21	Increased	2.458	THBD	thrombomodulin	Plasma Membrane	transmembrane receptor	8.17504e-05	5.46994e-06	up	3.21574	3.21574	1.68515	77
Cardiovascular System Development and Function, Organismal Development	vasculogenesis	5.3e-21	Increased	2.458	TNF	tumor necrosis factor	Extracellular Space	cytokine	0.000291147	7.31026e-05	up	2.74571	2.74571	1.45718	77
Cardiovascular System Development and Function, Organismal Development	vasculogenesis	5.3e-21	Increased	2.458	TNFAIP3	TNF alpha induced protein 3	Nucleus	enzyme	4.63841e-05	6.73483e-07	up	3.2656	3.2656	1.70735	77
Cardiovascular System Development and Function, Organismal Development	vasculogenesis	5.3e-21	Increased	2.458	VEGFC	vascular endothelial growth factor C	Extracellular Space	growth factor	4.25833e-05	4.70028e-07	up	2.6596	2.6596	1.41121	77
Cardiovascular System Development and Function, Organismal Development	vasculogenesis	5.3e-21	Increased	2.458	VEZF1	vascular endothelial zinc finger 1	Nucleus	transcription regulator	0.000350557	0.000102189	down	3.01663	-3.01663	-1.59294	77
Cardiovascular System Development and Function, Organismal Development	vasculogenesis	5.3e-21	Increased	2.458	WNT5A	Wnt family member 5A	Extracellular Space	cytokine	9.09658e-05	6.84293e-06	up	3.07702	3.07702	1.62154	77
Cardiovascular System Development and Function, Organismal Development	vasculogenesis	5.3e-21	Increased	2.458	XDH	xanthine dehydrogenase	Cytoplasm	enzyme	0.000240351	4.90388e-05	up	2.04405	2.04405	1.03143	77
Cellular Movement	migration of tumor cell lines	1.14e-20	Increased	2.565	ACKR3	atypical chemokine receptor 3	Plasma Membrane	G-protein coupled receptor	0.00018251	2.96362e-05	up	2.02777	2.02777	1.0199	76
Cellular Movement	migration of tumor cell lines	1.14e-20	Increased	2.565	AREG	amphiregulin	Extracellular Space	growth factor	0.00030687	8.06945e-05	up	2.63063	2.63063	1.39541	76
Cellular Movement	migration of tumor cell lines	1.14e-20	Increased	2.565	ARHGDIB	Rho GDP dissociation inhibitor beta	Cytoplasm	enzyme	6.05334e-05	1.96135e-06	up	3.30009	3.30009	1.7225	76
Cellular Movement	migration of tumor cell lines	1.14e-20	Increased	2.565	ARRDC3	arrestin domain containing 3	Plasma Membrane	other	0.000106882	9.78984e-06	down	2.06704	-2.06704	-1.04756	76
Cellular Movement	migration of tumor cell lines	1.14e-20	Increased	2.565	CCL2	C-C motif chemokine ligand 2	Extracellular Space	cytokine	5.71384e-05	1.64325e-06	up	4.18932	4.18932	2.06672	76
Cellular Movement	migration of tumor cell lines	1.14e-20	Increased	2.565	CCL20	C-C motif chemokine ligand 20	Extracellular Space	cytokine	0.00012705	1.42377e-05	up	3.12207	3.12207	1.6425	76
Cellular Movement	migration of tumor cell lines	1.14e-20	Increased	2.565	CCL5	C-C motif chemokine ligand 5	Extracellular Space	cytokine	0.000244253	5.08419e-05	up	3.69923	3.69923	1.88723	76
Cellular Movement	migration of tumor cell lines	1.14e-20	Increased	2.565	CD40	CD40 molecule	Plasma Membrane	transmembrane receptor	9.69248e-05	8.01981e-06	up	2.53917	2.53917	1.34436	76
Cellular Movement	migration of tumor cell lines	1.14e-20	Increased	2.565	CD82	CD82 molecule	Plasma Membrane	other	0.000155574	2.11222e-05	up	2.66006	2.66006	1.41146	76
Cellular Movement	migration of tumor cell lines	1.14e-20	Increased	2.565	CDKN1A	cyclin-dependent kinase inhibitor 1A	Nucleus	kinase	0.000177018	2.76906e-05	up	2.34183	2.34183	1.22764	76
Cellular Movement	migration of tumor cell lines	1.14e-20	Increased	2.565	CSF2	colony stimulating factor 2	Extracellular Space	cytokine	0.000181511	2.91396e-05	up	3.2134	3.2134	1.6841	76
Cellular Movement	migration of tumor cell lines	1.14e-20	Increased	2.565	CXCL11	C-X-C motif chemokine ligand 11	Other	cytokine	0.000621227	0.000282085	up	2.52305	2.52305	1.33517	76
Cellular Movement	migration of tumor cell lines	1.14e-20	Increased	2.565	CXCL2	C-X-C motif chemokine ligand 2	Extracellular Space	cytokine	7.29755e-05	3.81133e-06	up	2.98142	2.98142	1.576	76
Cellular Movement	migration of tumor cell lines	1.14e-20	Increased	2.565	CXCL5	C-X-C motif chemokine ligand 5	Extracellular Space	cytokine	0.000517835	0.000205801	up	2.85352	2.85352	1.51274	76
Cellular Movement	migration of tumor cell lines	1.14e-20	Increased	2.565	CXCL8	C-X-C motif chemokine ligand 8	Extracellular Space	cytokine	4.70395e-05	7.41202e-07	up	6.01014	6.01014	2.5874	76
Cellular Movement	migration of tumor cell lines	1.14e-20	Increased	2.565	DDX58	DEXD/H-box helicase 58	Cytoplasm	enzyme	7.88016e-05	4.63882e-06	up	2.39664	2.39664	1.26101	76
Cellular Movement	migration of tumor cell lines	1.14e-20	Increased	2.565	DNAJB6	DnaJ heat shock protein family (Hsp40) member B6	Nucleus	transcription regulator	4.56082e-05	6.29335e-07	up	2.6549	2.6549	1.40866	76
Cellular Movement	migration of tumor cell lines	1.14e-20	Increased	2.565	EGLN3	egl-9 family hypoxia-inducible factor 3	Cytoplasm	enzyme	0.000151048	1.99892e-05	down	2.79284	-2.79284	-1.48173	76
Cellular Movement	migration of tumor cell lines	1.14e-20	Increased	2.565	EGR1	early growth response 1	Nucleus	transcription regulator	0.000910266	0.000531525	down	2.02311	-2.02311	-1.01658	76
Cellular Movement	migration of tumor cell lines	1.14e-20	Increased	2.565	ENAH	enabled homolog (Drosophila)	Plasma Membrane	other	0.00010603	9.54714e-06	down	2.97451	-2.97451	-1.57265	76
Cellular Movement	migration of tumor cell lines	1.14e-20	Increased	2.565	EPHB1	EPH receptor B1	Plasma Membrane	kinase	0.0001348	1.60689e-05	up	2.30644	2.30644	1.20567	76
Cellular Movement	migration of tumor cell lines	1.14e-20	Increased	2.565	ETS1	ETS proto-oncogene 1, transcription factor	Nucleus	transcription regulator	0.000727446	0.000371116	up	2.14953	2.14953	1.10402	76
Cellular Movement	migration of tumor cell lines	1.14e-20	Increased	2.565	ETV5	ETS variant 5	Nucleus	transcription regulator	0.000287693	7.17426e-05	up	2.60151	2.60151	1.37935	76
Cellular Movement	migration of tumor cell lines	1.14e-20	Increased	2.565	F3	coagulation factor III, tissue factor	Plasma Membrane	transmembrane receptor	0.000167293	2.45862e-05	up	2.83358	2.83358	1.50263	76
Cellular Movement	migration of tumor cell lines	1.14e-20	Increased	2.565	FGF1	fibroblast growth factor 1	Extracellular Space	growth factor	0.000689416	0.000339749	up	2.7327	2.7327	1.45033	76
Cellular Movement	migration of tumor cell lines	1.14e-20	Increased	2.565	FGF5	fibroblast growth factor 5	Extracellular Space	growth factor	3.65159e-05	2.83522e-07	up	3.22383	3.22383	1.68878	76
Cellular Movement	migration of tumor cell lines	1.14e-20	Increased	2.565	FGFR2	fibroblast growth factor receptor 2	Plasma Membrane	kinase	0.000292993	7.4204e-05	down	4.45302	-4.45302	-2.15478	76
Cellular Movement	migration of tumor cell lines	1.14e-20	Increased	2.565	GAB1	GRB2 associated binding protein 1	Cytoplasm	kinase	0.000120758	1.28231e-05	down	2.38756	-2.38756	-1.25554	76
Cellular Movement	migration of tumor cell lines	1.14e-20	Increased	2.565	GDF15	growth differentiation factor 15	Extracellular Space	growth factor	0.00194823	0.00151467	up	2.20534	2.20534	1.141	76
Cellular Movement	migration of tumor cell lines	1.14e-20	Increased	2.565	HAS2	hyaluronan synthase 2	Plasma Membrane	enzyme	8.96643e-05	6.63704e-06	up	2.84304	2.84304	1.50743	76
Cellular Movement	migration of tumor cell lines	1.14e-20	Increased	2.565	HBEGF	heparin binding EGF like growth factor	Extracellular Space	growth factor	0.000324605	9.06211e-05	up	2.92802	2.92802	1.54993	76
Cellular Movement	migration of tumor cell lines	1.14e-20	Increased	2.565	HMGA2	high mobility group AT-hook 2	Nucleus	enzyme	7.36928e-05	3.96405e-06	up	2.57121	2.57121	1.36245	76
Cellular Movement	migration of tumor cell lines	1.14e-20	Increased	2.565	HMOX1	heme oxygenase 1	Cytoplasm	enzyme	3.07978e-05	1.0198e-07	up	7.17615	7.17615	2.84321	76
Cellular Movement	migration of tumor cell lines	1.14e-20	Increased	2.565	ID1	inhibitor of DNA binding 1, HLH protein	Nucleus	transcription regulator	6.27081e-05	2.40082e-06	down	2.32483	-2.32483	-1.21713	76
Cellular Movement	migration of tumor cell lines	1.14e-20	Increased	2.565	IGFBP3	insulin like growth factor binding protein 3	Extracellular Space	other	2.3646e-05	3.67681e-08	down	2.30432	-2.30432	-1.20434	76
Cellular Movement	migration of tumor cell lines	1.14e-20	Increased	2.565	IL6	interleukin 6	Extracellular Space	cytokine	3.65159e-05	2.68298e-07	up	2.78882	2.78882	1.47965	76
Cellular Movement	migration of tumor cell lines	1.14e-20	Increased	2.565	ILF3	interleukin enhancer binding factor 3	Nucleus	transcription regulator	4.25833e-05	4.81981e-07	down	2.13305	-2.13305	-1.09292	76
Cellular Movement	migration of tumor cell lines	1.14e-20	Increased	2.565	ITGA2	integrin subunit alpha 2	Plasma Membrane	transmembrane receptor	0.000106124	9.61516e-06	up	4.46447	4.46447	2.15849	76
Cellular Movement	migration of tumor cell lines	1.14e-20	Increased	2.565	ITGB6	integrin subunit beta 6	Plasma Membrane	other	0.000220499	4.13446e-05	down	2.73909	-2.73909	-1.4537	76
Cellular Movement	migration of tumor cell lines	1.14e-20	Increased	2.565	KITLG	KIT ligand	Extracellular Space	growth factor	3.70634e-05	2.92673e-07	down	2.80656	-2.80656	-1.4888	76
Cellular Movement	migration of tumor cell lines	1.14e-20	Increased	2.565	KLF4	Kruppel-like factor 4 (gut)	Nucleus	transcription regulator	8.10095e-05	5.36545e-06	up	3.086	3.086	1.62574	76
Cellular Movement	migration of tumor cell lines	1.14e-20	Increased	2.565	LAMB3	laminin subunit beta 3	Extracellular Space	transporter	4.21995e-05	4.45304e-07	up	3.24474	3.24474	1.6981	76
Cellular Movement	migration of tumor cell lines	1.14e-20	Increased	2.565	LAMC2	laminin subunit gamma 2	Extracellular Space	other	4.99694e-05	1.06168e-06	up	2.58961	2.58961	1.37274	76
Cellular Movement	migration of tumor cell lines	1.14e-20	Increased	2.565	MAP3K1	mitogen-activated protein kinase kinase kinase 1	Cytoplasm	kinase	0.000104164	9.08987e-06	down	2.99182	-2.99182	-1.58102	76
Cellular Movement	migration of tumor cell lines	1.14e-20	Increased	2.565	MAP4K4	mitogen-activated protein kinase kinase kinase kinase 4	Cytoplasm	kinase	0.000136555	1.64327e-05	up	2.15776	2.15776	1.10954	76
Cellular Movement	migration of tumor cell lines	1.14e-20	Increased	2.565	MMP1	matrix metallopeptidase 1	Extracellular Space	peptidase	2.99009e-05	6.82824e-08	up	3.68258	3.68258	1.88072	76
Cellular Movement	migration of tumor cell lines	1.14e-20	Increased	2.565	MMP14	matrix metallopeptidase 14	Extracellular Space	peptidase	5.71384e-05	1.58188e-06	up	2.21198	2.21198	1.14534	76
Cellular Movement	migration of tumor cell lines	1.14e-20	Increased	2.565	MMP7	matrix metallopeptidase 7	Extracellular Space	peptidase	0.000324617	9.07357e-05	down	4.18581	-4.18581	-2.06551	76
Cellular Movement	migration of tumor cell lines	1.14e-20	Increased	2.565	MMP9	matrix metallopeptidase 9	Extracellular Space	peptidase	0.000105861	9.4402e-06	up	5.58648	5.58648	2.48194	76
Cellular Movement	migration of tumor cell lines	1.14e-20	Increased	2.565	MYO10	myosin X	Cytoplasm	other	0.000162608	2.2763e-05	up	3.21829	3.21829	1.68629	76
Cellular Movement	migration of tumor cell lines	1.14e-20	Increased	2.565	NREP	neuronal regeneration related protein	Cytoplasm	other	3.0027e-05	9.59985e-08	down	2.03785	-2.03785	-1.02705	76
Cellular Movement	migration of tumor cell lines	1.14e-20	Increased	2.565	NRP2	neuropilin 2	Plasma Membrane	kinase	0.000805229	0.000439483	down	2.02262	-2.02262	-1.01622	76
Cellular Movement	migration of tumor cell lines	1.14e-20	Increased	2.565	P2RY2	purinergic receptor P2Y2	Plasma Membrane	G-protein coupled receptor	0.000285062	7.05316e-05	up	2.09703	2.09703	1.06835	76
Cellular Movement	migration of tumor cell lines	1.14e-20	Increased	2.565	PHB2	prohibitin 2	Cytoplasm	transcription regulator	8.50289e-05	5.93702e-06	down	2.19986	-2.19986	-1.13741	76
Cellular Movement	migration of tumor cell lines	1.14e-20	Increased	2.565	PHLDA1	pleckstrin homology like domain family A member 1	Cytoplasm	other	4.21674e-05	4.04011e-07	up	2.56874	2.56874	1.36106	76
Cellular Movement	migration of tumor cell lines	1.14e-20	Increased	2.565	PLAT	plasminogen activator, tissue type	Extracellular Space	peptidase	0.000324331	9.0357e-05	up	2.93037	2.93037	1.55108	76
Cellular Movement	migration of tumor cell lines	1.14e-20	Increased	2.565	PLAU	plasminogen activator, urokinase	Extracellular Space	peptidase	7.29755e-05	3.74487e-06	up	4.08751	4.08751	2.03122	76
Cellular Movement	migration of tumor cell lines	1.14e-20	Increased	2.565	PLAUR	plasminogen activator, urokinase receptor	Plasma Membrane	transmembrane receptor	5.72628e-05	1.70817e-06	up	3.57375	3.57375	1.83744	76
Cellular Movement	migration of tumor cell lines	1.14e-20	Increased	2.565	PODXL	podocalyxin like	Plasma Membrane	kinase	6.8669e-05	2.89323e-06	up	2.31816	2.31816	1.21298	76
Cellular Movement	migration of tumor cell lines	1.14e-20	Increased	2.565	PPIF	peptidylprolyl isomerase F	Cytoplasm	enzyme	0.000117299	1.19067e-05	up	2.2634	2.2634	1.17849	76
Cellular Movement	migration of tumor cell lines	1.14e-20	Increased	2.565	RAP1A	RAP1A, member of RAS oncogene family	Cytoplasm	enzyme	5.67199e-05	1.48871e-06	up	2.16819	2.16819	1.11649	76
Cellular Movement	migration of tumor cell lines	1.14e-20	Increased	2.565	RGS3	regulator of G-protein signaling 3	Nucleus	other	0.00146999	0.00106616	up	2.21155	2.21155	1.14506	76
Cellular Movement	migration of tumor cell lines	1.14e-20	Increased	2.565	RHOB	ras homolog family member B	Cytoplasm	enzyme	6.81397e-05	2.79312e-06	down	3.93244	-3.93244	-1.97543	76
Cellular Movement	migration of tumor cell lines	1.14e-20	Increased	2.565	RPS6KA5	ribosomal protein S6 kinase A5	Nucleus	kinase	0.000896053	0.000519236	up	2.57033	2.57033	1.36195	76
Cellular Movement	migration of tumor cell lines	1.14e-20	Increased	2.565	SEMA3A	semaphorin 3A	Extracellular Space	other	0.000519394	0.000207155	up	2.7446	2.7446	1.4566	76
Cellular Movement	migration of tumor cell lines	1.14e-20	Increased	2.565	SFRP4	secreted frizzled related protein 4	Plasma Membrane	transmembrane receptor	0.00117179	0.000782337	down	2.0725	-2.0725	-1.05137	76
Cellular Movement	migration of tumor cell lines	1.14e-20	Increased	2.565	SOD2	superoxide dismutase 2, mitochondrial	Cytoplasm	enzyme	5.71384e-05	1.58904e-06	up	2.2088	2.2088	1.14326	76
Cellular Movement	migration of tumor cell lines	1.14e-20	Increased	2.565	SPRY2	sprouty RTK signaling antagonist 2	Plasma Membrane	other	0.000410306	0.000136093	up	2.82721	2.82721	1.49938	76
Cellular Movement	migration of tumor cell lines	1.14e-20	Increased	2.565	STAT1	signal transducer and activator of transcription 1	Nucleus	transcription regulator	0.000127302	1.44319e-05	down	2.48387	-2.48387	-1.31259	76
Cellular Movement	migration of tumor cell lines	1.14e-20	Increased	2.565	THRB	thyroid hormone receptor beta	Nucleus	ligand-dependent nuclear receptor	0.000438312	0.000152593	down	3.65533	-3.65533	-1.87	76
Cellular Movement	migration of tumor cell lines	1.14e-20	Increased	2.565	TLR2	toll like receptor 2	Plasma Membrane	transmembrane receptor	8.09449e-05	5.23963e-06	up	4.16405	4.16405	2.05799	76
Cellular Movement	migration of tumor cell lines	1.14e-20	Increased	2.565	TNF	tumor necrosis factor	Extracellular Space	cytokine	0.000291147	7.31026e-05	up	2.74571	2.74571	1.45718	76
Cellular Movement	migration of tumor cell lines	1.14e-20	Increased	2.565	VAV3	vav guanine nucleotide exchange factor 3	Extracellular Space	cytokine	9.63321e-05	7.8327e-06	down	8.02289	-8.02289	-3.00412	76
Cellular Movement	migration of tumor cell lines	1.14e-20	Increased	2.565	VEGFC	vascular endothelial growth factor C	Extracellular Space	growth factor	4.25833e-05	4.70028e-07	up	2.6596	2.6596	1.41121	76
Cellular Movement	migration of tumor cell lines	1.14e-20	Increased	2.565	WNT5A	Wnt family member 5A	Extracellular Space	cytokine	9.09658e-05	6.84293e-06	up	3.07702	3.07702	1.62154	76
Cellular Movement	migration of tumor cell lines	1.14e-20	Increased	2.565	XDH	xanthine dehydrogenase	Cytoplasm	enzyme	0.000240351	4.90388e-05	up	2.04405	2.04405	1.03143	76
Cellular Function and Maintenance	function of antigen presenting cells	2.36e-20		1.195	ADORA2B	adenosine A2b receptor	Plasma Membrane	G-protein coupled receptor	0.000155574	2.11387e-05	up	2.26916	2.26916	1.18216	40
Cellular Function and Maintenance	function of antigen presenting cells	2.36e-20		1.195	CCL2	C-C motif chemokine ligand 2	Extracellular Space	cytokine	5.71384e-05	1.64325e-06	up	4.18932	4.18932	2.06672	40
Cellular Function and Maintenance	function of antigen presenting cells	2.36e-20		1.195	CCL5	C-C motif chemokine ligand 5	Extracellular Space	cytokine	0.000244253	5.08419e-05	up	3.69923	3.69923	1.88723	40
Cellular Function and Maintenance	function of antigen presenting cells	2.36e-20		1.195	CD40	CD40 molecule	Plasma Membrane	transmembrane receptor	9.69248e-05	8.01981e-06	up	2.53917	2.53917	1.34436	40
Cellular Function and Maintenance	function of antigen presenting cells	2.36e-20		1.195	CLEC4E	C-type lectin domain family 4 member E	Plasma Membrane	other	3.65159e-05	2.25759e-07	up	3.93093	3.93093	1.97487	40
Cellular Function and Maintenance	function of antigen presenting cells	2.36e-20		1.195	CSF2	colony stimulating factor 2	Extracellular Space	cytokine	0.000181511	2.91396e-05	up	3.2134	3.2134	1.6841	40
Cellular Function and Maintenance	function of antigen presenting cells	2.36e-20		1.195	CTSS	cathepsin S	Cytoplasm	peptidase	0.000531564	0.000215648	up	3.37352	3.37352	1.75426	40
Cellular Function and Maintenance	function of antigen presenting cells	2.36e-20		1.195	CYLD	CYLD lysine 63 deubiquitinase	Nucleus	transcription regulator	5.67199e-05	1.53037e-06	up	2.37536	2.37536	1.24815	40
Cellular Function and Maintenance	function of antigen presenting cells	2.36e-20		1.195	DDX58	DEXD/H-box helicase 58	Cytoplasm	enzyme	7.88016e-05	4.63882e-06	up	2.39664	2.39664	1.26101	40
Cellular Function and Maintenance	function of antigen presenting cells	2.36e-20		1.195	EGR1	early growth response 1	Nucleus	transcription regulator	0.000910266	0.000531525	down	2.02311	-2.02311	-1.01658	40
Cellular Function and Maintenance	function of antigen presenting cells	2.36e-20		1.195	F3	coagulation factor III, tissue factor	Plasma Membrane	transmembrane receptor	0.000167293	2.45862e-05	up	2.83358	2.83358	1.50263	40
Cellular Function and Maintenance	function of antigen presenting cells	2.36e-20		1.195	GDF15	growth differentiation factor 15	Extracellular Space	growth factor	0.00194823	0.00151467	up	2.20534	2.20534	1.141	40
Cellular Function and Maintenance	function of antigen presenting cells	2.36e-20		1.195	GPR68	G protein-coupled receptor 68	Plasma Membrane	G-protein coupled receptor	0.000123476	1.34876e-05	up	6.20326	6.20326	2.63303	40
Cellular Function and Maintenance	function of antigen presenting cells	2.36e-20		1.195	ICAM1	intercellular adhesion molecule 1	Plasma Membrane	transmembrane receptor	4.25833e-05	4.82261e-07	up	4.88337	4.88337	2.28788	40
Cellular Function and Maintenance	function of antigen presenting cells	2.36e-20		1.195	IFIH1	interferon induced with helicase C domain 1	Nucleus	enzyme	6.05334e-05	2.0177e-06	up	2.86486	2.86486	1.51846	40
Cellular Function and Maintenance	function of antigen presenting cells	2.36e-20		1.195	IL6	interleukin 6	Extracellular Space	cytokine	3.65159e-05	2.68298e-07	up	2.78882	2.78882	1.47965	40
Cellular Function and Maintenance	function of antigen presenting cells	2.36e-20		1.195	IRAK2	interleukin 1 receptor associated kinase 2	Plasma Membrane	kinase	0.000118827	1.23196e-05	up	3.36683	3.36683	1.75139	40
Cellular Function and Maintenance	function of antigen presenting cells	2.36e-20		1.195	LCP1	lymphocyte cytosolic protein 1	Cytoplasm	other	0.000136714	1.65312e-05	up	3.16095	3.16095	1.66036	40
Cellular Function and Maintenance	function of antigen presenting cells	2.36e-20		1.195	LTB	lymphotoxin beta	Extracellular Space	cytokine	0.000325041	9.10768e-05	up	3.23391	3.23391	1.69328	40
Cellular Function and Maintenance	function of antigen presenting cells	2.36e-20		1.195	LY96	lymphocyte antigen 96	Plasma Membrane	transmembrane receptor	0.000399174	0.000129442	up	2.09875	2.09875	1.06953	40
Cellular Function and Maintenance	function of antigen presenting cells	2.36e-20		1.195	MAVS	mitochondrial antiviral signaling protein	Cytoplasm	other	0.001397	0.000996787	down	2.47268	-2.47268	-1.30607	40
Cellular Function and Maintenance	function of antigen presenting cells	2.36e-20		1.195	MMP14	matrix metallopeptidase 14	Extracellular Space	peptidase	5.71384e-05	1.58188e-06	up	2.21198	2.21198	1.14534	40
Cellular Function and Maintenance	function of antigen presenting cells	2.36e-20		1.195	MMP7	matrix metallopeptidase 7	Extracellular Space	peptidase	0.000324617	9.07357e-05	down	4.18581	-4.18581	-2.06551	40
Cellular Function and Maintenance	function of antigen presenting cells	2.36e-20		1.195	MMP9	matrix metallopeptidase 9	Extracellular Space	peptidase	0.000105861	9.4402e-06	up	5.58648	5.58648	2.48194	40
Cellular Function and Maintenance	function of antigen presenting cells	2.36e-20		1.195	NLRP3	NLR family, pyrin domain containing 3	Cytoplasm	other	0.000235207	4.68615e-05	up	3.66524	3.66524	1.87391	40
Cellular Function and Maintenance	function of antigen presenting cells	2.36e-20		1.195	PDCD1LG2	programmed cell death 1 ligand 2	Plasma Membrane	enzyme	8.09449e-05	5.28019e-06	up	3.84934	3.84934	1.94461	40
Cellular Function and Maintenance	function of antigen presenting cells	2.36e-20		1.195	PLA2G4A	phospholipase A2 group IVA	Cytoplasm	enzyme	0.000319621	8.78429e-05	up	2.0774	2.0774	1.05478	40
Cellular Function and Maintenance	function of antigen presenting cells	2.36e-20		1.195	PLAT	plasminogen activator, tissue type	Extracellular Space	peptidase	0.000324331	9.0357e-05	up	2.93037	2.93037	1.55108	40
Cellular Function and Maintenance	function of antigen presenting cells	2.36e-20		1.195	PLAU	plasminogen activator, urokinase	Extracellular Space	peptidase	7.29755e-05	3.74487e-06	up	4.08751	4.08751	2.03122	40
Cellular Function and Maintenance	function of antigen presenting cells	2.36e-20		1.195	PLAUR	plasminogen activator, urokinase receptor	Plasma Membrane	transmembrane receptor	5.72628e-05	1.70817e-06	up	3.57375	3.57375	1.83744	40
Cellular Function and Maintenance	function of antigen presenting cells	2.36e-20		1.195	PPIA	peptidylprolyl isomerase A	Cytoplasm	enzyme	0.000213482	3.91661e-05	down	3.11421	-3.11421	-1.63887	40
Cellular Function and Maintenance	function of antigen presenting cells	2.36e-20		1.195	PTGER2	prostaglandin E receptor 2	Plasma Membrane	G-protein coupled receptor	0.000252601	5.47139e-05	down	2.17697	-2.17697	-1.12232	40
Cellular Function and Maintenance	function of antigen presenting cells	2.36e-20		1.195	RAP1A	RAP1A, member of RAS oncogene family	Cytoplasm	enzyme	5.67199e-05	1.48871e-06	up	2.16819	2.16819	1.11649	40
Cellular Function and Maintenance	function of antigen presenting cells	2.36e-20		1.195	SEMA3A	semaphorin 3A	Extracellular Space	other	0.000519394	0.000207155	up	2.7446	2.7446	1.4566	40
Cellular Function and Maintenance	function of antigen presenting cells	2.36e-20		1.195	SLAMF8	SLAM family member 8	Extracellular Space	other	7.88016e-05	4.7411e-06	up	3.16658	3.16658	1.66293	40
Cellular Function and Maintenance	function of antigen presenting cells	2.36e-20		1.195	STAT1	signal transducer and activator of transcription 1	Nucleus	transcription regulator	0.000127302	1.44319e-05	down	2.48387	-2.48387	-1.31259	40
Cellular Function and Maintenance	function of antigen presenting cells	2.36e-20		1.195	TLR2	toll like receptor 2	Plasma Membrane	transmembrane receptor	8.09449e-05	5.23963e-06	up	4.16405	4.16405	2.05799	40
Cellular Function and Maintenance	function of antigen presenting cells	2.36e-20		1.195	TNF	tumor necrosis factor	Extracellular Space	cytokine	0.000291147	7.31026e-05	up	2.74571	2.74571	1.45718	40
Cellular Function and Maintenance	function of antigen presenting cells	2.36e-20		1.195	TPCN1	two pore segment channel 1	Plasma Membrane	ion channel	0.000102976	8.88898e-06	up	2.02403	2.02403	1.01723	40
Cellular Function and Maintenance	function of antigen presenting cells	2.36e-20		1.195	UCP2	uncoupling protein 2	Cytoplasm	transporter	0.000212663	3.87543e-05	down	2.04574	-2.04574	-1.03262	40
Cellular Movement, Immune Cell Trafficking	leukocyte migration	3.51e-20	Increased	2.931	ACKR3	atypical chemokine receptor 3	Plasma Membrane	G-protein coupled receptor	0.00018251	2.96362e-05	up	2.02777	2.02777	1.0199	83
Cellular Movement, Immune Cell Trafficking	leukocyte migration	3.51e-20	Increased	2.931	ADORA2B	adenosine A2b receptor	Plasma Membrane	G-protein coupled receptor	0.000155574	2.11387e-05	up	2.26916	2.26916	1.18216	83
Cellular Movement, Immune Cell Trafficking	leukocyte migration	3.51e-20	Increased	2.931	AIMP1	aminoacyl tRNA synthetase complex-interacting multifunctional protein 1	Extracellular Space	cytokine	0.00061013	0.000272183	down	2.17524	-2.17524	-1.12117	83
Cellular Movement, Immune Cell Trafficking	leukocyte migration	3.51e-20	Increased	2.931	ALOX5AP	arachidonate 5-lipoxygenase activating protein	Plasma Membrane	other	0.000451005	0.00016139	up	2.27085	2.27085	1.18323	83
Cellular Movement, Immune Cell Trafficking	leukocyte migration	3.51e-20	Increased	2.931	C3	complement component 3	Extracellular Space	peptidase	0.000166276	2.38974e-05	up	3.15758	3.15758	1.65882	83
Cellular Movement, Immune Cell Trafficking	leukocyte migration	3.51e-20	Increased	2.931	CCL2	C-C motif chemokine ligand 2	Extracellular Space	cytokine	5.71384e-05	1.64325e-06	up	4.18932	4.18932	2.06672	83
Cellular Movement, Immune Cell Trafficking	leukocyte migration	3.51e-20	Increased	2.931	CCL20	C-C motif chemokine ligand 20	Extracellular Space	cytokine	0.00012705	1.42377e-05	up	3.12207	3.12207	1.6425	83
Cellular Movement, Immune Cell Trafficking	leukocyte migration	3.51e-20	Increased	2.931	CCL5	C-C motif chemokine ligand 5	Extracellular Space	cytokine	0.000244253	5.08419e-05	up	3.69923	3.69923	1.88723	83
Cellular Movement, Immune Cell Trafficking	leukocyte migration	3.51e-20	Increased	2.931	CCRL2	C-C motif chemokine receptor like 2	Plasma Membrane	G-protein coupled receptor	0.000666537	0.000320999	up	2.14323	2.14323	1.09978	83
Cellular Movement, Immune Cell Trafficking	leukocyte migration	3.51e-20	Increased	2.931	CD40	CD40 molecule	Plasma Membrane	transmembrane receptor	9.69248e-05	8.01981e-06	up	2.53917	2.53917	1.34436	83
Cellular Movement, Immune Cell Trafficking	leukocyte migration	3.51e-20	Increased	2.931	CDKN1A	cyclin-dependent kinase inhibitor 1A	Nucleus	kinase	0.000177018	2.76906e-05	up	2.34183	2.34183	1.22764	83
Cellular Movement, Immune Cell Trafficking	leukocyte migration	3.51e-20	Increased	2.931	CHST1	carbohydrate sulfotransferase 1	Cytoplasm	enzyme	0.00110681	0.000717112	up	3.40019	3.40019	1.76562	83
Cellular Movement, Immune Cell Trafficking	leukocyte migration	3.51e-20	Increased	2.931	CLEC4E	C-type lectin domain family 4 member E	Plasma Membrane	other	3.65159e-05	2.25759e-07	up	3.93093	3.93093	1.97487	83
Cellular Movement, Immune Cell Trafficking	leukocyte migration	3.51e-20	Increased	2.931	CSF2	colony stimulating factor 2	Extracellular Space	cytokine	0.000181511	2.91396e-05	up	3.2134	3.2134	1.6841	83
Cellular Movement, Immune Cell Trafficking	leukocyte migration	3.51e-20	Increased	2.931	CTSS	cathepsin S	Cytoplasm	peptidase	0.000531564	0.000215648	up	3.37352	3.37352	1.75426	83
Cellular Movement, Immune Cell Trafficking	leukocyte migration	3.51e-20	Increased	2.931	CXCL1	C-X-C motif chemokine ligand 1	Extracellular Space	cytokine	7.2018e-05	3.46222e-06	up	2.66667	2.66667	1.41504	83
Cellular Movement, Immune Cell Trafficking	leukocyte migration	3.51e-20	Increased	2.931	CXCL11	C-X-C motif chemokine ligand 11	Other	cytokine	0.000621227	0.000282085	up	2.52305	2.52305	1.33517	83
Cellular Movement, Immune Cell Trafficking	leukocyte migration	3.51e-20	Increased	2.931	CXCL2	C-X-C motif chemokine ligand 2	Extracellular Space	cytokine	7.29755e-05	3.81133e-06	up	2.98142	2.98142	1.576	83
Cellular Movement, Immune Cell Trafficking	leukocyte migration	3.51e-20	Increased	2.931	CXCL3	C-X-C motif chemokine ligand 3	Extracellular Space	cytokine	0.000453284	0.000162494	up	3.10131	3.10131	1.63288	83
Cellular Movement, Immune Cell Trafficking	leukocyte migration	3.51e-20	Increased	2.931	CXCL5	C-X-C motif chemokine ligand 5	Extracellular Space	cytokine	0.000517835	0.000205801	up	2.85352	2.85352	1.51274	83
Cellular Movement, Immune Cell Trafficking	leukocyte migration	3.51e-20	Increased	2.931	CXCL8	C-X-C motif chemokine ligand 8	Extracellular Space	cytokine	4.70395e-05	7.41202e-07	up	6.01014	6.01014	2.5874	83
Cellular Movement, Immune Cell Trafficking	leukocyte migration	3.51e-20	Increased	2.931	DDX58	DEXD/H-box helicase 58	Cytoplasm	enzyme	7.88016e-05	4.63882e-06	up	2.39664	2.39664	1.26101	83
Cellular Movement, Immune Cell Trafficking	leukocyte migration	3.51e-20	Increased	2.931	EGLN3	egl-9 family hypoxia-inducible factor 3	Cytoplasm	enzyme	0.000151048	1.99892e-05	down	2.79284	-2.79284	-1.48173	83
Cellular Movement, Immune Cell Trafficking	leukocyte migration	3.51e-20	Increased	2.931	EGR1	early growth response 1	Nucleus	transcription regulator	0.000910266	0.000531525	down	2.02311	-2.02311	-1.01658	83
Cellular Movement, Immune Cell Trafficking	leukocyte migration	3.51e-20	Increased	2.931	ETS1	ETS proto-oncogene 1, transcription factor	Nucleus	transcription regulator	0.000727446	0.000371116	up	2.14953	2.14953	1.10402	83
Cellular Movement, Immune Cell Trafficking	leukocyte migration	3.51e-20	Increased	2.931	F3	coagulation factor III, tissue factor	Plasma Membrane	transmembrane receptor	0.000167293	2.45862e-05	up	2.83358	2.83358	1.50263	83
Cellular Movement, Immune Cell Trafficking	leukocyte migration	3.51e-20	Increased	2.931	FGF1	fibroblast growth factor 1	Extracellular Space	growth factor	0.000689416	0.000339749	up	2.7327	2.7327	1.45033	83
Cellular Movement, Immune Cell Trafficking	leukocyte migration	3.51e-20	Increased	2.931	GAL3ST1	galactose-3-O-sulfotransferase 1	Cytoplasm	enzyme	7.01231e-05	3.15466e-06	down	2.06855	-2.06855	-1.04862	83
Cellular Movement, Immune Cell Trafficking	leukocyte migration	3.51e-20	Increased	2.931	GDF15	growth differentiation factor 15	Extracellular Space	growth factor	0.00194823	0.00151467	up	2.20534	2.20534	1.141	83
Cellular Movement, Immune Cell Trafficking	leukocyte migration	3.51e-20	Increased	2.931	GJB2	gap junction protein beta 2	Plasma Membrane	transporter	4.21674e-05	4.2607e-07	up	2.38678	2.38678	1.25507	83
Cellular Movement, Immune Cell Trafficking	leukocyte migration	3.51e-20	Increased	2.931	HAVCR1	hepatitis A virus cellular receptor 1	Plasma Membrane	other	0.000114195	1.1129e-05	down	2.97561	-2.97561	-1.57319	83
Cellular Movement, Immune Cell Trafficking	leukocyte migration	3.51e-20	Increased	2.931	HMOX1	heme oxygenase 1	Cytoplasm	enzyme	3.07978e-05	1.0198e-07	up	7.17615	7.17615	2.84321	83
Cellular Movement, Immune Cell Trafficking	leukocyte migration	3.51e-20	Increased	2.931	ICAM1	intercellular adhesion molecule 1	Plasma Membrane	transmembrane receptor	4.25833e-05	4.82261e-07	up	4.88337	4.88337	2.28788	83
Cellular Movement, Immune Cell Trafficking	leukocyte migration	3.51e-20	Increased	2.931	IGFBP3	insulin like growth factor binding protein 3	Extracellular Space	other	2.3646e-05	3.67681e-08	down	2.30432	-2.30432	-1.20434	83
Cellular Movement, Immune Cell Trafficking	leukocyte migration	3.51e-20	Increased	2.931	IL6	interleukin 6	Extracellular Space	cytokine	3.65159e-05	2.68298e-07	up	2.78882	2.78882	1.47965	83
Cellular Movement, Immune Cell Trafficking	leukocyte migration	3.51e-20	Increased	2.931	INHBA	inhibin beta A	Extracellular Space	growth factor	6.18657e-05	2.29577e-06	up	3.71771	3.71771	1.89441	83
Cellular Movement, Immune Cell Trafficking	leukocyte migration	3.51e-20	Increased	2.931	ITGA2	integrin subunit alpha 2	Plasma Membrane	transmembrane receptor	0.000106124	9.61516e-06	up	4.46447	4.46447	2.15849	83
Cellular Movement, Immune Cell Trafficking	leukocyte migration	3.51e-20	Increased	2.931	KITLG	KIT ligand	Extracellular Space	growth factor	3.70634e-05	2.92673e-07	down	2.80656	-2.80656	-1.4888	83
Cellular Movement, Immune Cell Trafficking	leukocyte migration	3.51e-20	Increased	2.931	LCP1	lymphocyte cytosolic protein 1	Cytoplasm	other	0.000136714	1.65312e-05	up	3.16095	3.16095	1.66036	83
Cellular Movement, Immune Cell Trafficking	leukocyte migration	3.51e-20	Increased	2.931	LITAF	lipopolysaccharide induced TNF factor	Nucleus	transcription regulator	5.71384e-05	1.65447e-06	down	2.76449	-2.76449	-1.46701	83
Cellular Movement, Immune Cell Trafficking	leukocyte migration	3.51e-20	Increased	2.931	LTB	lymphotoxin beta	Extracellular Space	cytokine	0.000325041	9.10768e-05	up	3.23391	3.23391	1.69328	83
Cellular Movement, Immune Cell Trafficking	leukocyte migration	3.51e-20	Increased	2.931	LY96	lymphocyte antigen 96	Plasma Membrane	transmembrane receptor	0.000399174	0.000129442	up	2.09875	2.09875	1.06953	83
Cellular Movement, Immune Cell Trafficking	leukocyte migration	3.51e-20	Increased	2.931	MAVS	mitochondrial antiviral signaling protein	Cytoplasm	other	0.001397	0.000996787	down	2.47268	-2.47268	-1.30607	83
Cellular Movement, Immune Cell Trafficking	leukocyte migration	3.51e-20	Increased	2.931	MIR17HG	miR-17-92a-1 cluster host gene	Other	other	0.000810491	0.000443466	down	2.15606	-2.15606	-1.1084	83
Cellular Movement, Immune Cell Trafficking	leukocyte migration	3.51e-20	Increased	2.931	MMP1	matrix metallopeptidase 1	Extracellular Space	peptidase	2.99009e-05	6.82824e-08	up	3.68258	3.68258	1.88072	83
Cellular Movement, Immune Cell Trafficking	leukocyte migration	3.51e-20	Increased	2.931	MMP14	matrix metallopeptidase 14	Extracellular Space	peptidase	5.71384e-05	1.58188e-06	up	2.21198	2.21198	1.14534	83
Cellular Movement, Immune Cell Trafficking	leukocyte migration	3.51e-20	Increased	2.931	MMP7	matrix metallopeptidase 7	Extracellular Space	peptidase	0.000324617	9.07357e-05	down	4.18581	-4.18581	-2.06551	83
Cellular Movement, Immune Cell Trafficking	leukocyte migration	3.51e-20	Increased	2.931	MMP9	matrix metallopeptidase 9	Extracellular Space	peptidase	0.000105861	9.4402e-06	up	5.58648	5.58648	2.48194	83
Cellular Movement, Immune Cell Trafficking	leukocyte migration	3.51e-20	Increased	2.931	NLRP3	NLR family, pyrin domain containing 3	Cytoplasm	other	0.000235207	4.68615e-05	up	3.66524	3.66524	1.87391	83
Cellular Movement, Immune Cell Trafficking	leukocyte migration	3.51e-20	Increased	2.931	NRP2	neuropilin 2	Plasma Membrane	kinase	0.000805229	0.000439483	down	2.02262	-2.02262	-1.01622	83
Cellular Movement, Immune Cell Trafficking	leukocyte migration	3.51e-20	Increased	2.931	NT5E	5'-nucleotidase ecto	Plasma Membrane	phosphatase	8.09449e-05	5.25908e-06	up	3.37637	3.37637	1.75547	83
Cellular Movement, Immune Cell Trafficking	leukocyte migration	3.51e-20	Increased	2.931	P2RY2	purinergic receptor P2Y2	Plasma Membrane	G-protein coupled receptor	0.000285062	7.05316e-05	up	2.09703	2.09703	1.06835	83
Cellular Movement, Immune Cell Trafficking	leukocyte migration	3.51e-20	Increased	2.931	PDCD1LG2	programmed cell death 1 ligand 2	Plasma Membrane	enzyme	8.09449e-05	5.28019e-06	up	3.84934	3.84934	1.94461	83
Cellular Movement, Immune Cell Trafficking	leukocyte migration	3.51e-20	Increased	2.931	PELI1	pellino E3 ubiquitin protein ligase 1	Cytoplasm	enzyme	0.00158172	0.00117464	down	2.50182	-2.50182	-1.32298	83
Cellular Movement, Immune Cell Trafficking	leukocyte migration	3.51e-20	Increased	2.931	PLA2G4A	phospholipase A2 group IVA	Cytoplasm	enzyme	0.000319621	8.78429e-05	up	2.0774	2.0774	1.05478	83
Cellular Movement, Immune Cell Trafficking	leukocyte migration	3.51e-20	Increased	2.931	PLAT	plasminogen activator, tissue type	Extracellular Space	peptidase	0.000324331	9.0357e-05	up	2.93037	2.93037	1.55108	83
Cellular Movement, Immune Cell Trafficking	leukocyte migration	3.51e-20	Increased	2.931	PLAU	plasminogen activator, urokinase	Extracellular Space	peptidase	7.29755e-05	3.74487e-06	up	4.08751	4.08751	2.03122	83
Cellular Movement, Immune Cell Trafficking	leukocyte migration	3.51e-20	Increased	2.931	PLAUR	plasminogen activator, urokinase receptor	Plasma Membrane	transmembrane receptor	5.72628e-05	1.70817e-06	up	3.57375	3.57375	1.83744	83
Cellular Movement, Immune Cell Trafficking	leukocyte migration	3.51e-20	Increased	2.931	PPIA	peptidylprolyl isomerase A	Cytoplasm	enzyme	0.000213482	3.91661e-05	down	3.11421	-3.11421	-1.63887	83
Cellular Movement, Immune Cell Trafficking	leukocyte migration	3.51e-20	Increased	2.931	PROCR	protein C receptor	Plasma Membrane	other	4.80549e-05	8.55968e-07	down	2.18783	-2.18783	-1.1295	83
Cellular Movement, Immune Cell Trafficking	leukocyte migration	3.51e-20	Increased	2.931	PTX3	pentraxin 3	Extracellular Space	other	0.000292993	7.42705e-05	up	3.61367	3.61367	1.85347	83
Cellular Movement, Immune Cell Trafficking	leukocyte migration	3.51e-20	Increased	2.931	RAP1A	RAP1A, member of RAS oncogene family	Cytoplasm	enzyme	5.67199e-05	1.48871e-06	up	2.16819	2.16819	1.11649	83
Cellular Movement, Immune Cell Trafficking	leukocyte migration	3.51e-20	Increased	2.931	RCAN1	regulator of calcineurin 1	Nucleus	transcription regulator	7.03519e-05	3.19708e-06	up	2.17179	2.17179	1.11888	83
Cellular Movement, Immune Cell Trafficking	leukocyte migration	3.51e-20	Increased	2.931	RGS3	regulator of G-protein signaling 3	Nucleus	other	0.00146999	0.00106616	up	2.21155	2.21155	1.14506	83
Cellular Movement, Immune Cell Trafficking	leukocyte migration	3.51e-20	Increased	2.931	RHOB	ras homolog family member B	Cytoplasm	enzyme	6.81397e-05	2.79312e-06	down	3.93244	-3.93244	-1.97543	83
Cellular Movement, Immune Cell Trafficking	leukocyte migration	3.51e-20	Increased	2.931	S1PR1	sphingosine-1-phosphate receptor 1	Plasma Membrane	G-protein coupled receptor	1.48349e-06	3.38774e-10	down	7.79723	-7.79723	-2.96296	83
Cellular Movement, Immune Cell Trafficking	leukocyte migration	3.51e-20	Increased	2.931	SAA1	serum amyloid A1	Extracellular Space	transporter	7.47863e-05	4.10752e-06	up	2.96712	2.96712	1.56907	83
Cellular Movement, Immune Cell Trafficking	leukocyte migration	3.51e-20	Increased	2.931	SEMA3A	semaphorin 3A	Extracellular Space	other	0.000519394	0.000207155	up	2.7446	2.7446	1.4566	83
Cellular Movement, Immune Cell Trafficking	leukocyte migration	3.51e-20	Increased	2.931	SERP1	stress-associated endoplasmic reticulum protein 1	Cytoplasm	other	7.47863e-05	4.12444e-06	up	3.26233	3.26233	1.7059	83
Cellular Movement, Immune Cell Trafficking	leukocyte migration	3.51e-20	Increased	2.931	SOD2	superoxide dismutase 2, mitochondrial	Cytoplasm	enzyme	5.71384e-05	1.58904e-06	up	2.2088	2.2088	1.14326	83
Cellular Movement, Immune Cell Trafficking	leukocyte migration	3.51e-20	Increased	2.931	STAT1	signal transducer and activator of transcription 1	Nucleus	transcription regulator	0.000127302	1.44319e-05	down	2.48387	-2.48387	-1.31259	83
Cellular Movement, Immune Cell Trafficking	leukocyte migration	3.51e-20	Increased	2.931	STC1	stanniocalcin 1	Extracellular Space	kinase	0.000278723	6.72781e-05	up	2.19527	2.19527	1.1344	83
Cellular Movement, Immune Cell Trafficking	leukocyte migration	3.51e-20	Increased	2.931	SWAP70	SWAP switching B-cell complex 70kDa subunit	Cytoplasm	other	5.71384e-05	1.62624e-06	down	2.19703	-2.19703	-1.13556	83
Cellular Movement, Immune Cell Trafficking	leukocyte migration	3.51e-20	Increased	2.931	THBD	thrombomodulin	Plasma Membrane	transmembrane receptor	8.17504e-05	5.46994e-06	up	3.21574	3.21574	1.68515	83
Cellular Movement, Immune Cell Trafficking	leukocyte migration	3.51e-20	Increased	2.931	TLR2	toll like receptor 2	Plasma Membrane	transmembrane receptor	8.09449e-05	5.23963e-06	up	4.16405	4.16405	2.05799	83
Cellular Movement, Immune Cell Trafficking	leukocyte migration	3.51e-20	Increased	2.931	TNF	tumor necrosis factor	Extracellular Space	cytokine	0.000291147	7.31026e-05	up	2.74571	2.74571	1.45718	83
Cellular Movement, Immune Cell Trafficking	leukocyte migration	3.51e-20	Increased	2.931	TNFAIP3	TNF alpha induced protein 3	Nucleus	enzyme	4.63841e-05	6.73483e-07	up	3.2656	3.2656	1.70735	83
Cellular Movement, Immune Cell Trafficking	leukocyte migration	3.51e-20	Increased	2.931	UCP2	uncoupling protein 2	Cytoplasm	transporter	0.000212663	3.87543e-05	down	2.04574	-2.04574	-1.03262	83
Cellular Movement, Immune Cell Trafficking	leukocyte migration	3.51e-20	Increased	2.931	VAV3	vav guanine nucleotide exchange factor 3	Extracellular Space	cytokine	9.63321e-05	7.8327e-06	down	8.02289	-8.02289	-3.00412	83
Cellular Movement, Immune Cell Trafficking	leukocyte migration	3.51e-20	Increased	2.931	VDR	vitamin D (1,25- dihydroxyvitamin D3) receptor	Nucleus	transcription regulator	0.000664155	0.000317745	up	3.17167	3.17167	1.66524	83
Cellular Movement, Immune Cell Trafficking	leukocyte migration	3.51e-20	Increased	2.931	VEGFC	vascular endothelial growth factor C	Extracellular Space	growth factor	4.25833e-05	4.70028e-07	up	2.6596	2.6596	1.41121	83
Cellular Movement, Immune Cell Trafficking	leukocyte migration	3.51e-20	Increased	2.931	WNT5A	Wnt family member 5A	Extracellular Space	cytokine	9.09658e-05	6.84293e-06	up	3.07702	3.07702	1.62154	83
Cellular Movement, Immune Cell Trafficking	leukocyte migration	3.51e-20	Increased	2.931	XDH	xanthine dehydrogenase	Cytoplasm	enzyme	0.000240351	4.90388e-05	up	2.04405	2.04405	1.03143	83
Cellular Movement	invasion of cells	2.61e-19	Increased	2.62	ACKR3	atypical chemokine receptor 3	Plasma Membrane	G-protein coupled receptor	0.00018251	2.96362e-05	up	2.02777	2.02777	1.0199	82
Cellular Movement	invasion of cells	2.61e-19	Increased	2.62	ANXA8/ANXA8L1	annexin A8-like 1	Plasma Membrane	other	0.00121248	0.0008211	up	2.6304	2.6304	1.39528	82
Cellular Movement	invasion of cells	2.61e-19	Increased	2.62	AREG	amphiregulin	Extracellular Space	growth factor	0.00030687	8.06945e-05	up	2.63063	2.63063	1.39541	82
Cellular Movement	invasion of cells	2.61e-19	Increased	2.62	ARRDC3	arrestin domain containing 3	Plasma Membrane	other	0.000106882	9.78984e-06	down	2.06704	-2.06704	-1.04756	82
Cellular Movement	invasion of cells	2.61e-19	Increased	2.62	ARTN	artemin	Extracellular Space	growth factor	0.000206984	3.7069e-05	down	2.07866	-2.07866	-1.05565	82
Cellular Movement	invasion of cells	2.61e-19	Increased	2.62	CCL2	C-C motif chemokine ligand 2	Extracellular Space	cytokine	5.71384e-05	1.64325e-06	up	4.18932	4.18932	2.06672	82
Cellular Movement	invasion of cells	2.61e-19	Increased	2.62	CD82	CD82 molecule	Plasma Membrane	other	0.000155574	2.11222e-05	up	2.66006	2.66006	1.41146	82
Cellular Movement	invasion of cells	2.61e-19	Increased	2.62	CDKN1A	cyclin-dependent kinase inhibitor 1A	Nucleus	kinase	0.000177018	2.76906e-05	up	2.34183	2.34183	1.22764	82
Cellular Movement	invasion of cells	2.61e-19	Increased	2.62	COPB2	coatomer protein complex subunit beta 2	Cytoplasm	transporter	9.63321e-05	7.85242e-06	down	2.97235	-2.97235	-1.5716	82
Cellular Movement	invasion of cells	2.61e-19	Increased	2.62	CSF2	colony stimulating factor 2	Extracellular Space	cytokine	0.000181511	2.91396e-05	up	3.2134	3.2134	1.6841	82
Cellular Movement	invasion of cells	2.61e-19	Increased	2.62	CTSS	cathepsin S	Cytoplasm	peptidase	0.000531564	0.000215648	up	3.37352	3.37352	1.75426	82
Cellular Movement	invasion of cells	2.61e-19	Increased	2.62	CXCL1	C-X-C motif chemokine ligand 1	Extracellular Space	cytokine	7.2018e-05	3.46222e-06	up	2.66667	2.66667	1.41504	82
Cellular Movement	invasion of cells	2.61e-19	Increased	2.62	CXCL5	C-X-C motif chemokine ligand 5	Extracellular Space	cytokine	0.000517835	0.000205801	up	2.85352	2.85352	1.51274	82
Cellular Movement	invasion of cells	2.61e-19	Increased	2.62	CXCL8	C-X-C motif chemokine ligand 8	Extracellular Space	cytokine	4.70395e-05	7.41202e-07	up	6.01014	6.01014	2.5874	82
Cellular Movement	invasion of cells	2.61e-19	Increased	2.62	DDX58	DEXD/H-box helicase 58	Cytoplasm	enzyme	7.88016e-05	4.63882e-06	up	2.39664	2.39664	1.26101	82
Cellular Movement	invasion of cells	2.61e-19	Increased	2.62	DNAJB6	DnaJ heat shock protein family (Hsp40) member B6	Nucleus	transcription regulator	4.56082e-05	6.29335e-07	up	2.6549	2.6549	1.40866	82
Cellular Movement	invasion of cells	2.61e-19	Increased	2.62	DNMBP	dynamin binding protein	Cytoplasm	other	0.000123281	1.34256e-05	up	2.22464	2.22464	1.15357	82
Cellular Movement	invasion of cells	2.61e-19	Increased	2.62	DOCK4	dedicator of cytokinesis 4	Plasma Membrane	other	3.0027e-05	8.92081e-08	up	3.29638	3.29638	1.72088	82
Cellular Movement	invasion of cells	2.61e-19	Increased	2.62	DUSP6	dual specificity phosphatase 6	Cytoplasm	phosphatase	4.05507e-05	3.60207e-07	up	4.36083	4.36083	2.1246	82
Cellular Movement	invasion of cells	2.61e-19	Increased	2.62	EGR1	early growth response 1	Nucleus	transcription regulator	0.000910266	0.000531525	down	2.02311	-2.02311	-1.01658	82
Cellular Movement	invasion of cells	2.61e-19	Increased	2.62	ELF3	E74 like ETS transcription factor 3	Nucleus	transcription regulator	6.05334e-05	1.99347e-06	down	2.80437	-2.80437	-1.48768	82
Cellular Movement	invasion of cells	2.61e-19	Increased	2.62	ENAH	enabled homolog (Drosophila)	Plasma Membrane	other	0.00010603	9.54714e-06	down	2.97451	-2.97451	-1.57265	82
Cellular Movement	invasion of cells	2.61e-19	Increased	2.62	ETS1	ETS proto-oncogene 1, transcription factor	Nucleus	transcription regulator	0.000727446	0.000371116	up	2.14953	2.14953	1.10402	82
Cellular Movement	invasion of cells	2.61e-19	Increased	2.62	ETV5	ETS variant 5	Nucleus	transcription regulator	0.000287693	7.17426e-05	up	2.60151	2.60151	1.37935	82
Cellular Movement	invasion of cells	2.61e-19	Increased	2.62	F3	coagulation factor III, tissue factor	Plasma Membrane	transmembrane receptor	0.000167293	2.45862e-05	up	2.83358	2.83358	1.50263	82
Cellular Movement	invasion of cells	2.61e-19	Increased	2.62	FAM43A	family with sequence similarity 43 member A	Other	other	0.000259857	5.79902e-05	up	3.5897	3.5897	1.84386	82
Cellular Movement	invasion of cells	2.61e-19	Increased	2.62	FGFR2	fibroblast growth factor receptor 2	Plasma Membrane	kinase	0.000292993	7.4204e-05	down	4.45302	-4.45302	-2.15478	82
Cellular Movement	invasion of cells	2.61e-19	Increased	2.62	GAB1	GRB2 associated binding protein 1	Cytoplasm	kinase	0.000120758	1.28231e-05	down	2.38756	-2.38756	-1.25554	82
Cellular Movement	invasion of cells	2.61e-19	Increased	2.62	GDF15	growth differentiation factor 15	Extracellular Space	growth factor	0.00194823	0.00151467	up	2.20534	2.20534	1.141	82
Cellular Movement	invasion of cells	2.61e-19	Increased	2.62	GEM	GTP binding protein overexpressed in skeletal muscle	Plasma Membrane	enzyme	0.000122297	1.31545e-05	up	2.14791	2.14791	1.10294	82
Cellular Movement	invasion of cells	2.61e-19	Increased	2.62	HAS2	hyaluronan synthase 2	Plasma Membrane	enzyme	8.96643e-05	6.63704e-06	up	2.84304	2.84304	1.50743	82
Cellular Movement	invasion of cells	2.61e-19	Increased	2.62	HBEGF	heparin binding EGF like growth factor	Extracellular Space	growth factor	0.000324605	9.06211e-05	up	2.92802	2.92802	1.54993	82
Cellular Movement	invasion of cells	2.61e-19	Increased	2.62	HIPK2	homeodomain interacting protein kinase 2	Nucleus	kinase	4.76218e-05	8.20133e-07	down	3.90758	-3.90758	-1.96627	82
Cellular Movement	invasion of cells	2.61e-19	Increased	2.62	HMGA2	high mobility group AT-hook 2	Nucleus	enzyme	7.36928e-05	3.96405e-06	up	2.57121	2.57121	1.36245	82
Cellular Movement	invasion of cells	2.61e-19	Increased	2.62	HMOX1	heme oxygenase 1	Cytoplasm	enzyme	3.07978e-05	1.0198e-07	up	7.17615	7.17615	2.84321	82
Cellular Movement	invasion of cells	2.61e-19	Increased	2.62	ID1	inhibitor of DNA binding 1, HLH protein	Nucleus	transcription regulator	6.27081e-05	2.40082e-06	down	2.32483	-2.32483	-1.21713	82
Cellular Movement	invasion of cells	2.61e-19	Increased	2.62	IL6	interleukin 6	Extracellular Space	cytokine	3.65159e-05	2.68298e-07	up	2.78882	2.78882	1.47965	82
Cellular Movement	invasion of cells	2.61e-19	Increased	2.62	ILF3	interleukin enhancer binding factor 3	Nucleus	transcription regulator	4.25833e-05	4.81981e-07	down	2.13305	-2.13305	-1.09292	82
Cellular Movement	invasion of cells	2.61e-19	Increased	2.62	INHBA	inhibin beta A	Extracellular Space	growth factor	6.18657e-05	2.29577e-06	up	3.71771	3.71771	1.89441	82
Cellular Movement	invasion of cells	2.61e-19	Increased	2.62	ITGA2	integrin subunit alpha 2	Plasma Membrane	transmembrane receptor	0.000106124	9.61516e-06	up	4.46447	4.46447	2.15849	82
Cellular Movement	invasion of cells	2.61e-19	Increased	2.62	ITGB6	integrin subunit beta 6	Plasma Membrane	other	0.000220499	4.13446e-05	down	2.73909	-2.73909	-1.4537	82
Cellular Movement	invasion of cells	2.61e-19	Increased	2.62	KITLG	KIT ligand	Extracellular Space	growth factor	3.70634e-05	2.92673e-07	down	2.80656	-2.80656	-1.4888	82
Cellular Movement	invasion of cells	2.61e-19	Increased	2.62	KLF4	Kruppel-like factor 4 (gut)	Nucleus	transcription regulator	8.10095e-05	5.36545e-06	up	3.086	3.086	1.62574	82
Cellular Movement	invasion of cells	2.61e-19	Increased	2.62	LAMB3	laminin subunit beta 3	Extracellular Space	transporter	4.21995e-05	4.45304e-07	up	3.24474	3.24474	1.6981	82
Cellular Movement	invasion of cells	2.61e-19	Increased	2.62	LCP1	lymphocyte cytosolic protein 1	Cytoplasm	other	0.000136714	1.65312e-05	up	3.16095	3.16095	1.66036	82
Cellular Movement	invasion of cells	2.61e-19	Increased	2.62	LRIG1	leucine-rich repeats and immunoglobulin like domains 1	Extracellular Space	other	0.000368078	0.000112928	up	2.6276	2.6276	1.39375	82
Cellular Movement	invasion of cells	2.61e-19	Increased	2.62	MAP4K4	mitogen-activated protein kinase kinase kinase kinase 4	Cytoplasm	kinase	0.000136555	1.64327e-05	up	2.15776	2.15776	1.10954	82
Cellular Movement	invasion of cells	2.61e-19	Increased	2.62	MIR17HG	miR-17-92a-1 cluster host gene	Other	other	0.000810491	0.000443466	down	2.15606	-2.15606	-1.1084	82
Cellular Movement	invasion of cells	2.61e-19	Increased	2.62	MMP1	matrix metallopeptidase 1	Extracellular Space	peptidase	2.99009e-05	6.82824e-08	up	3.68258	3.68258	1.88072	82
Cellular Movement	invasion of cells	2.61e-19	Increased	2.62	MMP14	matrix metallopeptidase 14	Extracellular Space	peptidase	5.71384e-05	1.58188e-06	up	2.21198	2.21198	1.14534	82
Cellular Movement	invasion of cells	2.61e-19	Increased	2.62	MMP9	matrix metallopeptidase 9	Extracellular Space	peptidase	0.000105861	9.4402e-06	up	5.58648	5.58648	2.48194	82
Cellular Movement	invasion of cells	2.61e-19	Increased	2.62	NRP2	neuropilin 2	Plasma Membrane	kinase	0.000805229	0.000439483	down	2.02262	-2.02262	-1.01622	82
Cellular Movement	invasion of cells	2.61e-19	Increased	2.62	PAPPA	pappalysin 1	Extracellular Space	peptidase	0.000596275	0.000262189	up	2.6645	2.6645	1.41387	82
Cellular Movement	invasion of cells	2.61e-19	Increased	2.62	PLAT	plasminogen activator, tissue type	Extracellular Space	peptidase	0.000324331	9.0357e-05	up	2.93037	2.93037	1.55108	82
Cellular Movement	invasion of cells	2.61e-19	Increased	2.62	PLAU	plasminogen activator, urokinase	Extracellular Space	peptidase	7.29755e-05	3.74487e-06	up	4.08751	4.08751	2.03122	82
Cellular Movement	invasion of cells	2.61e-19	Increased	2.62	PLAUR	plasminogen activator, urokinase receptor	Plasma Membrane	transmembrane receptor	5.72628e-05	1.70817e-06	up	3.57375	3.57375	1.83744	82
Cellular Movement	invasion of cells	2.61e-19	Increased	2.62	PODXL	podocalyxin like	Plasma Membrane	kinase	6.8669e-05	2.89323e-06	up	2.31816	2.31816	1.21298	82
Cellular Movement	invasion of cells	2.61e-19	Increased	2.62	PPIF	peptidylprolyl isomerase F	Cytoplasm	enzyme	0.000117299	1.19067e-05	up	2.2634	2.2634	1.17849	82
Cellular Movement	invasion of cells	2.61e-19	Increased	2.62	PRKAA1	protein kinase AMP-activated catalytic subunit alpha 1	Cytoplasm	kinase	0.00048552	0.000183941	down	2.44451	-2.44451	-1.28954	82
Cellular Movement	invasion of cells	2.61e-19	Increased	2.62	PTGER2	prostaglandin E receptor 2	Plasma Membrane	G-protein coupled receptor	0.000252601	5.47139e-05	down	2.17697	-2.17697	-1.12232	82
Cellular Movement	invasion of cells	2.61e-19	Increased	2.62	RAB11FIP1	RAB11 family interacting protein 1	Cytoplasm	other	0.000464526	0.000170497	down	3.11373	-3.11373	-1.63864	82
Cellular Movement	invasion of cells	2.61e-19	Increased	2.62	RAP1A	RAP1A, member of RAS oncogene family	Cytoplasm	enzyme	5.67199e-05	1.48871e-06	up	2.16819	2.16819	1.11649	82
Cellular Movement	invasion of cells	2.61e-19	Increased	2.62	RGS4	regulator of G-protein signaling 4	Cytoplasm	other	4.9534e-05	9.97018e-07	up	2.89909	2.89909	1.5356	82
Cellular Movement	invasion of cells	2.61e-19	Increased	2.62	RHOB	ras homolog family member B	Cytoplasm	enzyme	6.81397e-05	2.79312e-06	down	3.93244	-3.93244	-1.97543	82
Cellular Movement	invasion of cells	2.61e-19	Increased	2.62	RPSA	ribosomal protein SA	Cytoplasm	translation regulator	4.9534e-05	1.00921e-06	up	4.16121	4.16121	2.057	82
Cellular Movement	invasion of cells	2.61e-19	Increased	2.62	SAA1	serum amyloid A1	Extracellular Space	transporter	7.47863e-05	4.10752e-06	up	2.96712	2.96712	1.56907	82
Cellular Movement	invasion of cells	2.61e-19	Increased	2.62	SERP1	stress-associated endoplasmic reticulum protein 1	Cytoplasm	other	7.47863e-05	4.12444e-06	up	3.26233	3.26233	1.7059	82
Cellular Movement	invasion of cells	2.61e-19	Increased	2.62	SOD2	superoxide dismutase 2, mitochondrial	Cytoplasm	enzyme	5.71384e-05	1.58904e-06	up	2.2088	2.2088	1.14326	82
Cellular Movement	invasion of cells	2.61e-19	Increased	2.62	SP100	SP100 nuclear antigen	Nucleus	transcription regulator	0.000850382	0.00047736	up	2.11249	2.11249	1.07894	82
Cellular Movement	invasion of cells	2.61e-19	Increased	2.62	SPRY2	sprouty RTK signaling antagonist 2	Plasma Membrane	other	0.000410306	0.000136093	up	2.82721	2.82721	1.49938	82
Cellular Movement	invasion of cells	2.61e-19	Increased	2.62	STAT1	signal transducer and activator of transcription 1	Nucleus	transcription regulator	0.000127302	1.44319e-05	down	2.48387	-2.48387	-1.31259	82
Cellular Movement	invasion of cells	2.61e-19	Increased	2.62	THBD	thrombomodulin	Plasma Membrane	transmembrane receptor	8.17504e-05	5.46994e-06	up	3.21574	3.21574	1.68515	82
Cellular Movement	invasion of cells	2.61e-19	Increased	2.62	THRB	thyroid hormone receptor beta	Nucleus	ligand-dependent nuclear receptor	0.000438312	0.000152593	down	3.65533	-3.65533	-1.87	82
Cellular Movement	invasion of cells	2.61e-19	Increased	2.62	TLR2	toll like receptor 2	Plasma Membrane	transmembrane receptor	8.09449e-05	5.23963e-06	up	4.16405	4.16405	2.05799	82
Cellular Movement	invasion of cells	2.61e-19	Increased	2.62	TNF	tumor necrosis factor	Extracellular Space	cytokine	0.000291147	7.31026e-05	up	2.74571	2.74571	1.45718	82
Cellular Movement	invasion of cells	2.61e-19	Increased	2.62	VAV3	vav guanine nucleotide exchange factor 3	Extracellular Space	cytokine	9.63321e-05	7.8327e-06	down	8.02289	-8.02289	-3.00412	82
Cellular Movement	invasion of cells	2.61e-19	Increased	2.62	VDR	vitamin D (1,25- dihydroxyvitamin D3) receptor	Nucleus	transcription regulator	0.000664155	0.000317745	up	3.17167	3.17167	1.66524	82
Cellular Movement	invasion of cells	2.61e-19	Increased	2.62	VEGFC	vascular endothelial growth factor C	Extracellular Space	growth factor	4.25833e-05	4.70028e-07	up	2.6596	2.6596	1.41121	82
Cellular Movement	invasion of cells	2.61e-19	Increased	2.62	WNT5A	Wnt family member 5A	Extracellular Space	cytokine	9.09658e-05	6.84293e-06	up	3.07702	3.07702	1.62154	82
Cellular Movement	invasion of cells	2.61e-19	Increased	2.62	WSB1	WD repeat and SOCS box containing 1	Other	other	0.000514457	0.000202834	down	2.31514	-2.31514	-1.2111	82
Cellular Movement	invasion of cells	2.61e-19	Increased	2.62	XDH	xanthine dehydrogenase	Cytoplasm	enzyme	0.000240351	4.90388e-05	up	2.04405	2.04405	1.03143	82
Cellular Movement	invasion of cells	2.61e-19	Increased	2.62	ZAK	sterile alpha motif and leucine zipper containing kinase AZK	Cytoplasm	kinase	4.9534e-05	9.30809e-07	down	3.37023	-3.37023	-1.75285	82
Cell Death and Survival	cell death	2.65e-19		1.225	ACKR3	atypical chemokine receptor 3	Plasma Membrane	G-protein coupled receptor	0.00018251	2.96362e-05	up	2.02777	2.02777	1.0199	196
Cell Death and Survival	cell death	2.65e-19		1.225	ADD3	adducin 3	Cytoplasm	other	4.76218e-05	8.21065e-07	down	2.36919	-2.36919	-1.24439	196
Cell Death and Survival	cell death	2.65e-19		1.225	ADORA2B	adenosine A2b receptor	Plasma Membrane	G-protein coupled receptor	0.000155574	2.11387e-05	up	2.26916	2.26916	1.18216	196
Cell Death and Survival	cell death	2.65e-19		1.225	AIMP1	aminoacyl tRNA synthetase complex-interacting multifunctional protein 1	Extracellular Space	cytokine	0.00061013	0.000272183	down	2.17524	-2.17524	-1.12117	196
Cell Death and Survival	cell death	2.65e-19		1.225	ALDH1A1	aldehyde dehydrogenase 1 family member A1	Cytoplasm	enzyme	4.38315e-05	5.73166e-07	down	3.45275	-3.45275	-1.78775	196
Cell Death and Survival	cell death	2.65e-19		1.225	AMACR	alpha-methylacyl-CoA racemase	Cytoplasm	enzyme	0.000457031	0.000164694	down	2.48248	-2.48248	-1.31178	196
Cell Death and Survival	cell death	2.65e-19		1.225	ANTXR2	anthrax toxin receptor 2	Plasma Membrane	transmembrane receptor	5.23957e-05	1.20403e-06	up	5.25029	5.25029	2.3924	196
Cell Death and Survival	cell death	2.65e-19		1.225	AREG	amphiregulin	Extracellular Space	growth factor	0.00030687	8.06945e-05	up	2.63063	2.63063	1.39541	196
Cell Death and Survival	cell death	2.65e-19		1.225	ARG2	arginase 2	Cytoplasm	enzyme	0.000291983	7.3746e-05	up	2.06061	2.06061	1.04307	196
Cell Death and Survival	cell death	2.65e-19		1.225	ARHGDIB	Rho GDP dissociation inhibitor beta	Cytoplasm	enzyme	6.05334e-05	1.96135e-06	up	3.30009	3.30009	1.7225	196
Cell Death and Survival	cell death	2.65e-19		1.225	ARID3B	AT-rich interaction domain 3B	Nucleus	transcription regulator	6.27081e-05	2.39932e-06	up	2.2713	2.2713	1.18352	196
Cell Death and Survival	cell death	2.65e-19		1.225	ARTN	artemin	Extracellular Space	growth factor	0.000206984	3.7069e-05	down	2.07866	-2.07866	-1.05565	196
Cell Death and Survival	cell death	2.65e-19		1.225	ATP6V0D2	ATPase H+ transporting V0 subunit d2	Cytoplasm	transporter	0.000761211	0.000399292	up	2.12224	2.12224	1.08559	196
Cell Death and Survival	cell death	2.65e-19		1.225	BCL2A1	BCL2 related protein A1	Cytoplasm	other	2.49541e-05	4.55887e-08	up	11.3611	11.3611	3.50603	196
Cell Death and Survival	cell death	2.65e-19		1.225	BRINP1	BMP/retinoic acid inducible neural specific 1	Nucleus	peptidase	0.000163502	2.30561e-05	down	2.51468	-2.51468	-1.33037	196
Cell Death and Survival	cell death	2.65e-19		1.225	C3	complement component 3	Extracellular Space	peptidase	0.000166276	2.38974e-05	up	3.15758	3.15758	1.65882	196
Cell Death and Survival	cell death	2.65e-19		1.225	CCL2	C-C motif chemokine ligand 2	Extracellular Space	cytokine	5.71384e-05	1.64325e-06	up	4.18932	4.18932	2.06672	196
Cell Death and Survival	cell death	2.65e-19		1.225	CCL5	C-C motif chemokine ligand 5	Extracellular Space	cytokine	0.000244253	5.08419e-05	up	3.69923	3.69923	1.88723	196
Cell Death and Survival	cell death	2.65e-19		1.225	CCNG1	cyclin G1	Nucleus	other	5.23957e-05	1.25288e-06	down	2.53544	-2.53544	-1.34224	196
Cell Death and Survival	cell death	2.65e-19		1.225	CD40	CD40 molecule	Plasma Membrane	transmembrane receptor	9.69248e-05	8.01981e-06	up	2.53917	2.53917	1.34436	196
Cell Death and Survival	cell death	2.65e-19		1.225	CD82	CD82 molecule	Plasma Membrane	other	0.000155574	2.11222e-05	up	2.66006	2.66006	1.41146	196
Cell Death and Survival	cell death	2.65e-19		1.225	CDA	cytidine deaminase	Nucleus	enzyme	0.000722094	0.000367313	up	2.01104	2.01104	1.00794	196
Cell Death and Survival	cell death	2.65e-19		1.225	CDH6	cadherin 6	Plasma Membrane	other	5.28114e-05	1.29647e-06	down	2.96946	-2.96946	-1.5702	196
Cell Death and Survival	cell death	2.65e-19		1.225	CDKN1A	cyclin-dependent kinase inhibitor 1A	Nucleus	kinase	0.000177018	2.76906e-05	up	2.34183	2.34183	1.22764	196
Cell Death and Survival	cell death	2.65e-19		1.225	CDKN1C	cyclin-dependent kinase inhibitor 1C	Nucleus	other	9.05642e-05	6.78352e-06	down	2.73683	-2.73683	-1.45251	196
Cell Death and Survival	cell death	2.65e-19		1.225	CERS6	ceramide synthase 6	Nucleus	transcription regulator	0.000239634	4.85159e-05	down	2.09715	-2.09715	-1.06843	196
Cell Death and Survival	cell death	2.65e-19		1.225	CFI	complement factor I	Extracellular Space	peptidase	0.000113272	1.09702e-05	down	2.57781	-2.57781	-1.36614	196
Cell Death and Survival	cell death	2.65e-19		1.225	COPB2	coatomer protein complex subunit beta 2	Cytoplasm	transporter	9.63321e-05	7.85242e-06	down	2.97235	-2.97235	-1.5716	196
Cell Death and Survival	cell death	2.65e-19		1.225	CSF2	colony stimulating factor 2	Extracellular Space	cytokine	0.000181511	2.91396e-05	up	3.2134	3.2134	1.6841	196
Cell Death and Survival	cell death	2.65e-19		1.225	CTSS	cathepsin S	Cytoplasm	peptidase	0.000531564	0.000215648	up	3.37352	3.37352	1.75426	196
Cell Death and Survival	cell death	2.65e-19		1.225	CXCL1	C-X-C motif chemokine ligand 1	Extracellular Space	cytokine	7.2018e-05	3.46222e-06	up	2.66667	2.66667	1.41504	196
Cell Death and Survival	cell death	2.65e-19		1.225	CXCL11	C-X-C motif chemokine ligand 11	Other	cytokine	0.000621227	0.000282085	up	2.52305	2.52305	1.33517	196
Cell Death and Survival	cell death	2.65e-19		1.225	CXCL2	C-X-C motif chemokine ligand 2	Extracellular Space	cytokine	7.29755e-05	3.81133e-06	up	2.98142	2.98142	1.576	196
Cell Death and Survival	cell death	2.65e-19		1.225	CXCL3	C-X-C motif chemokine ligand 3	Extracellular Space	cytokine	0.000453284	0.000162494	up	3.10131	3.10131	1.63288	196
Cell Death and Survival	cell death	2.65e-19		1.225	CXCL8	C-X-C motif chemokine ligand 8	Extracellular Space	cytokine	4.70395e-05	7.41202e-07	up	6.01014	6.01014	2.5874	196
Cell Death and Survival	cell death	2.65e-19		1.225	CYB5R4	cytochrome b5 reductase 4	Cytoplasm	enzyme	4.63841e-05	6.92223e-07	down	2.04363	-2.04363	-1.03113	196
Cell Death and Survival	cell death	2.65e-19		1.225	CYLD	CYLD lysine 63 deubiquitinase	Nucleus	transcription regulator	5.67199e-05	1.53037e-06	up	2.37536	2.37536	1.24815	196
Cell Death and Survival	cell death	2.65e-19		1.225	DAP	death-associated protein	Cytoplasm	transcription regulator	0.000137712	1.67916e-05	down	2.37834	-2.37834	-1.24996	196
Cell Death and Survival	cell death	2.65e-19		1.225	DDX58	DEXD/H-box helicase 58	Cytoplasm	enzyme	7.88016e-05	4.63882e-06	up	2.39664	2.39664	1.26101	196
Cell Death and Survival	cell death	2.65e-19		1.225	DNAJB6	DnaJ heat shock protein family (Hsp40) member B6	Nucleus	transcription regulator	4.56082e-05	6.29335e-07	up	2.6549	2.6549	1.40866	196
Cell Death and Survival	cell death	2.65e-19		1.225	DUSP6	dual specificity phosphatase 6	Cytoplasm	phosphatase	4.05507e-05	3.60207e-07	up	4.36083	4.36083	2.1246	196
Cell Death and Survival	cell death	2.65e-19		1.225	DUT	deoxyuridine triphosphatase	Nucleus	enzyme	0.000180774	2.89799e-05	down	3.33942	-3.33942	-1.7396	196
Cell Death and Survival	cell death	2.65e-19		1.225	ECE1	endothelin converting enzyme 1	Plasma Membrane	peptidase	0.000147862	1.93143e-05	up	2.01302	2.01302	1.00936	196
Cell Death and Survival	cell death	2.65e-19		1.225	EGLN3	egl-9 family hypoxia-inducible factor 3	Cytoplasm	enzyme	0.000151048	1.99892e-05	down	2.79284	-2.79284	-1.48173	196
Cell Death and Survival	cell death	2.65e-19		1.225	EGR1	early growth response 1	Nucleus	transcription regulator	0.000910266	0.000531525	down	2.02311	-2.02311	-1.01658	196
Cell Death and Survival	cell death	2.65e-19		1.225	EMP1	epithelial membrane protein 1	Plasma Membrane	other	7.2018e-05	3.47547e-06	up	3.52521	3.52521	1.81771	196
Cell Death and Survival	cell death	2.65e-19		1.225	ETS1	ETS proto-oncogene 1, transcription factor	Nucleus	transcription regulator	0.000727446	0.000371116	up	2.14953	2.14953	1.10402	196
Cell Death and Survival	cell death	2.65e-19		1.225	ETV5	ETS variant 5	Nucleus	transcription regulator	0.000287693	7.17426e-05	up	2.60151	2.60151	1.37935	196
Cell Death and Survival	cell death	2.65e-19		1.225	F3	coagulation factor III, tissue factor	Plasma Membrane	transmembrane receptor	0.000167293	2.45862e-05	up	2.83358	2.83358	1.50263	196
Cell Death and Survival	cell death	2.65e-19		1.225	FAT4	FAT atypical cadherin 4	Cytoplasm	other	0.000140996	1.76768e-05	down	2.05447	-2.05447	-1.03877	196
Cell Death and Survival	cell death	2.65e-19		1.225	FBXO32	F-box protein 32	Cytoplasm	enzyme	0.000134066	1.59195e-05	up	2.08519	2.08519	1.06018	196
Cell Death and Survival	cell death	2.65e-19		1.225	FGF1	fibroblast growth factor 1	Extracellular Space	growth factor	0.000689416	0.000339749	up	2.7327	2.7327	1.45033	196
Cell Death and Survival	cell death	2.65e-19		1.225	FGF5	fibroblast growth factor 5	Extracellular Space	growth factor	3.65159e-05	2.83522e-07	up	3.22383	3.22383	1.68878	196
Cell Death and Survival	cell death	2.65e-19		1.225	FGFR2	fibroblast growth factor receptor 2	Plasma Membrane	kinase	0.000292993	7.4204e-05	down	4.45302	-4.45302	-2.15478	196
Cell Death and Survival	cell death	2.65e-19		1.225	G0S2	G0/G1 switch 2	Cytoplasm	other	4.86622e-05	8.94566e-07	up	2.78473	2.78473	1.47754	196
Cell Death and Survival	cell death	2.65e-19		1.225	GAB1	GRB2 associated binding protein 1	Cytoplasm	kinase	0.000120758	1.28231e-05	down	2.38756	-2.38756	-1.25554	196
Cell Death and Survival	cell death	2.65e-19		1.225	GALNT3	polypeptide N-acetylgalactosaminyltransferase 3	Cytoplasm	enzyme	6.1152e-05	2.17153e-06	up	2.46405	2.46405	1.30103	196
Cell Death and Survival	cell death	2.65e-19		1.225	GDF15	growth differentiation factor 15	Extracellular Space	growth factor	0.00194823	0.00151467	up	2.20534	2.20534	1.141	196
Cell Death and Survival	cell death	2.65e-19		1.225	GEM	GTP binding protein overexpressed in skeletal muscle	Plasma Membrane	enzyme	0.000122297	1.31545e-05	up	2.14791	2.14791	1.10294	196
Cell Death and Survival	cell death	2.65e-19		1.225	GJB2	gap junction protein beta 2	Plasma Membrane	transporter	4.21674e-05	4.2607e-07	up	2.38678	2.38678	1.25507	196
Cell Death and Survival	cell death	2.65e-19		1.225	GPHN	gephyrin	Plasma Membrane	enzyme	0.000595076	0.000261477	down	2.00646	-2.00646	-1.00465	196
Cell Death and Survival	cell death	2.65e-19		1.225	HAS2	hyaluronan synthase 2	Plasma Membrane	enzyme	8.96643e-05	6.63704e-06	up	2.84304	2.84304	1.50743	196
Cell Death and Survival	cell death	2.65e-19		1.225	HBEGF	heparin binding EGF like growth factor	Extracellular Space	growth factor	0.000324605	9.06211e-05	up	2.92802	2.92802	1.54993	196
Cell Death and Survival	cell death	2.65e-19		1.225	HERPUD1	homocysteine inducible ER protein with ubiquitin like domain 1	Cytoplasm	other	6.854e-05	2.87996e-06	up	3.03957	3.03957	1.60387	196
Cell Death and Survival	cell death	2.65e-19		1.225	HIPK2	homeodomain interacting protein kinase 2	Nucleus	kinase	4.76218e-05	8.20133e-07	down	3.90758	-3.90758	-1.96627	196
Cell Death and Survival	cell death	2.65e-19		1.225	HMGA2	high mobility group AT-hook 2	Nucleus	enzyme	7.36928e-05	3.96405e-06	up	2.57121	2.57121	1.36245	196
Cell Death and Survival	cell death	2.65e-19		1.225	HMOX1	heme oxygenase 1	Cytoplasm	enzyme	3.07978e-05	1.0198e-07	up	7.17615	7.17615	2.84321	196
Cell Death and Survival	cell death	2.65e-19		1.225	HOXA13	homeobox A13	Nucleus	transcription regulator	0.000455334	0.000163773	down	2.37492	-2.37492	-1.24788	196
Cell Death and Survival	cell death	2.65e-19		1.225	HSD17B4	hydroxysteroid (17-beta) dehydrogenase 4	Cytoplasm	enzyme	3.99514e-05	3.42128e-07	down	2.01416	-2.01416	-1.01018	196
Cell Death and Survival	cell death	2.65e-19		1.225	HSPA9	heat shock protein family A (Hsp70) member 9	Cytoplasm	other	5.12481e-05	1.15744e-06	down	2.64295	-2.64295	-1.40215	196
Cell Death and Survival	cell death	2.65e-19		1.225	ICAM1	intercellular adhesion molecule 1	Plasma Membrane	transmembrane receptor	4.25833e-05	4.82261e-07	up	4.88337	4.88337	2.28788	196
Cell Death and Survival	cell death	2.65e-19		1.225	ID1	inhibitor of DNA binding 1, HLH protein	Nucleus	transcription regulator	6.27081e-05	2.40082e-06	down	2.32483	-2.32483	-1.21713	196
Cell Death and Survival	cell death	2.65e-19		1.225	IFIH1	interferon induced with helicase C domain 1	Nucleus	enzyme	6.05334e-05	2.0177e-06	up	2.86486	2.86486	1.51846	196
Cell Death and Survival	cell death	2.65e-19		1.225	IGFBP3	insulin like growth factor binding protein 3	Extracellular Space	other	2.3646e-05	3.67681e-08	down	2.30432	-2.30432	-1.20434	196
Cell Death and Survival	cell death	2.65e-19		1.225	IL6	interleukin 6	Extracellular Space	cytokine	3.65159e-05	2.68298e-07	up	2.78882	2.78882	1.47965	196
Cell Death and Survival	cell death	2.65e-19		1.225	ILF3	interleukin enhancer binding factor 3	Nucleus	transcription regulator	4.25833e-05	4.81981e-07	down	2.13305	-2.13305	-1.09292	196
Cell Death and Survival	cell death	2.65e-19		1.225	INHBA	inhibin beta A	Extracellular Space	growth factor	6.18657e-05	2.29577e-06	up	3.71771	3.71771	1.89441	196
Cell Death and Survival	cell death	2.65e-19		1.225	IRAK2	interleukin 1 receptor associated kinase 2	Plasma Membrane	kinase	0.000118827	1.23196e-05	up	3.36683	3.36683	1.75139	196
Cell Death and Survival	cell death	2.65e-19		1.225	IRF9	interferon regulatory factor 9	Nucleus	transcription regulator	0.000133447	1.57552e-05	up	2.37847	2.37847	1.25003	196
Cell Death and Survival	cell death	2.65e-19		1.225	ISG20	interferon stimulated exonuclease gene 20kDa	Nucleus	enzyme	0.000697086	0.000346553	up	2.89234	2.89234	1.53224	196
Cell Death and Survival	cell death	2.65e-19		1.225	ISM1	isthmin 1, angiogenesis inhibitor	Other	other	5.59787e-05	1.4284e-06	up	3.52491	3.52491	1.81758	196
Cell Death and Survival	cell death	2.65e-19		1.225	ITGA2	integrin subunit alpha 2	Plasma Membrane	transmembrane receptor	0.000106124	9.61516e-06	up	4.46447	4.46447	2.15849	196
Cell Death and Survival	cell death	2.65e-19		1.225	KCNK3	potassium two pore domain channel subfamily K member 3	Plasma Membrane	ion channel	0.00040766	0.000134693	up	2.22179	2.22179	1.15172	196
Cell Death and Survival	cell death	2.65e-19		1.225	KITLG	KIT ligand	Extracellular Space	growth factor	3.70634e-05	2.92673e-07	down	2.80656	-2.80656	-1.4888	196
Cell Death and Survival	cell death	2.65e-19		1.225	KLF4	Kruppel-like factor 4 (gut)	Nucleus	transcription regulator	8.10095e-05	5.36545e-06	up	3.086	3.086	1.62574	196
Cell Death and Survival	cell death	2.65e-19		1.225	KLRC1	killer cell lectin like receptor C1	Plasma Membrane	transmembrane receptor	6.68109e-05	2.69456e-06	up	3.83336	3.83336	1.93861	196
Cell Death and Survival	cell death	2.65e-19		1.225	LIN7C	lin-7 homolog C, crumbs cell polarity complex component	Cytoplasm	other	7.88016e-05	4.73871e-06	down	2.48142	-2.48142	-1.31117	196
Cell Death and Survival	cell death	2.65e-19		1.225	LRIG1	leucine-rich repeats and immunoglobulin like domains 1	Extracellular Space	other	0.000368078	0.000112928	up	2.6276	2.6276	1.39375	196
Cell Death and Survival	cell death	2.65e-19		1.225	LTB	lymphotoxin beta	Extracellular Space	cytokine	0.000325041	9.10768e-05	up	3.23391	3.23391	1.69328	196
Cell Death and Survival	cell death	2.65e-19		1.225	MAP3K1	mitogen-activated protein kinase kinase kinase 1	Cytoplasm	kinase	0.000104164	9.08987e-06	down	2.99182	-2.99182	-1.58102	196
Cell Death and Survival	cell death	2.65e-19		1.225	MAP4K4	mitogen-activated protein kinase kinase kinase kinase 4	Cytoplasm	kinase	0.000136555	1.64327e-05	up	2.15776	2.15776	1.10954	196
Cell Death and Survival	cell death	2.65e-19		1.225	MAVS	mitochondrial antiviral signaling protein	Cytoplasm	other	0.001397	0.000996787	down	2.47268	-2.47268	-1.30607	196
Cell Death and Survival	cell death	2.65e-19		1.225	MCU	mitochondrial calcium uniporter	Cytoplasm	ion channel	6.08588e-05	2.15417e-06	down	2.31706	-2.31706	-1.2123	196
Cell Death and Survival	cell death	2.65e-19		1.225	MEF2D	myocyte enhancer factor 2D	Nucleus	transcription regulator	0.000102885	8.85955e-06	up	2.07063	2.07063	1.05007	196
Cell Death and Survival	cell death	2.65e-19		1.225	MIR17HG	miR-17-92a-1 cluster host gene	Other	other	0.000810491	0.000443466	down	2.15606	-2.15606	-1.1084	196
Cell Death and Survival	cell death	2.65e-19		1.225	MLKL	mixed lineage kinase domain-like	Cytoplasm	kinase	8.59099e-05	6.10447e-06	up	2.02262	2.02262	1.01622	196
Cell Death and Survival	cell death	2.65e-19		1.225	MMP1	matrix metallopeptidase 1	Extracellular Space	peptidase	2.99009e-05	6.82824e-08	up	3.68258	3.68258	1.88072	196
Cell Death and Survival	cell death	2.65e-19		1.225	MMP14	matrix metallopeptidase 14	Extracellular Space	peptidase	5.71384e-05	1.58188e-06	up	2.21198	2.21198	1.14534	196
Cell Death and Survival	cell death	2.65e-19		1.225	MMP7	matrix metallopeptidase 7	Extracellular Space	peptidase	0.000324617	9.07357e-05	down	4.18581	-4.18581	-2.06551	196
Cell Death and Survival	cell death	2.65e-19		1.225	MMP9	matrix metallopeptidase 9	Extracellular Space	peptidase	0.000105861	9.4402e-06	up	5.58648	5.58648	2.48194	196
Cell Death and Survival	cell death	2.65e-19		1.225	MTPN	myotrophin	Nucleus	transcription regulator	0.000241371	4.95333e-05	down	2.30585	-2.30585	-1.2053	196
Cell Death and Survival	cell death	2.65e-19		1.225	MXI1	MAX interactor 1, dimerization protein	Nucleus	transcription regulator	0.000287699	7.17973e-05	down	3.20286	-3.20286	-1.67936	196
Cell Death and Survival	cell death	2.65e-19		1.225	NCF2	neutrophil cytosolic factor 2	Cytoplasm	enzyme	0.000241371	4.9582e-05	up	2.83754	2.83754	1.50464	196
Cell Death and Survival	cell death	2.65e-19		1.225	NDEL1	nudE neurodevelopment protein 1 like 1	Nucleus	other	9.02543e-05	6.7397e-06	up	2.10114	2.10114	1.07117	196
Cell Death and Survival	cell death	2.65e-19		1.225	NEFL	neurofilament, light polypeptide	Cytoplasm	other	0.00012962	1.49185e-05	down	2.57733	-2.57733	-1.36588	196
Cell Death and Survival	cell death	2.65e-19		1.225	NFYA	nuclear transcription factor Y subunit alpha	Nucleus	transcription regulator	0.000230974	4.52045e-05	down	2.1825	-2.1825	-1.12598	196
Cell Death and Survival	cell death	2.65e-19		1.225	NLRP3	NLR family, pyrin domain containing 3	Cytoplasm	other	0.000235207	4.68615e-05	up	3.66524	3.66524	1.87391	196
Cell Death and Survival	cell death	2.65e-19		1.225	NT5E	5'-nucleotidase ecto	Plasma Membrane	phosphatase	8.09449e-05	5.25908e-06	up	3.37637	3.37637	1.75547	196
Cell Death and Survival	cell death	2.65e-19		1.225	OAS1	2'-5'-oligoadenylate synthetase 1	Cytoplasm	enzyme	0.000831887	0.000462867	up	2.54895	2.54895	1.3499	196
Cell Death and Survival	cell death	2.65e-19		1.225	OAS3	2'-5'-oligoadenylate synthetase 3	Cytoplasm	enzyme	0.000375918	0.00011733	up	2.42183	2.42183	1.2761	196
Cell Death and Survival	cell death	2.65e-19		1.225	PDCD1LG2	programmed cell death 1 ligand 2	Plasma Membrane	enzyme	8.09449e-05	5.28019e-06	up	3.84934	3.84934	1.94461	196
Cell Death and Survival	cell death	2.65e-19		1.225	PDZK1	PDZ domain containing 1	Plasma Membrane	transporter	3.59123e-05	1.64283e-07	down	4.64588	-4.64588	-2.21595	196
Cell Death and Survival	cell death	2.65e-19		1.225	PEX13	peroxisomal biogenesis factor 13	Cytoplasm	transporter	7.25781e-05	3.65497e-06	down	2.32362	-2.32362	-1.21637	196
Cell Death and Survival	cell death	2.65e-19		1.225	PHB2	prohibitin 2	Cytoplasm	transcription regulator	8.50289e-05	5.93702e-06	down	2.19986	-2.19986	-1.13741	196
Cell Death and Survival	cell death	2.65e-19		1.225	PHLDA1	pleckstrin homology like domain family A member 1	Cytoplasm	other	4.21674e-05	4.04011e-07	up	2.56874	2.56874	1.36106	196
Cell Death and Survival	cell death	2.65e-19		1.225	PLA2G4A	phospholipase A2 group IVA	Cytoplasm	enzyme	0.000319621	8.78429e-05	up	2.0774	2.0774	1.05478	196
Cell Death and Survival	cell death	2.65e-19		1.225	PLAC8	placenta specific 8	Nucleus	other	5.71384e-05	1.64277e-06	down	2.36696	-2.36696	-1.24304	196
Cell Death and Survival	cell death	2.65e-19		1.225	PLAT	plasminogen activator, tissue type	Extracellular Space	peptidase	0.000324331	9.0357e-05	up	2.93037	2.93037	1.55108	196
Cell Death and Survival	cell death	2.65e-19		1.225	PLAU	plasminogen activator, urokinase	Extracellular Space	peptidase	7.29755e-05	3.74487e-06	up	4.08751	4.08751	2.03122	196
Cell Death and Survival	cell death	2.65e-19		1.225	PLAUR	plasminogen activator, urokinase receptor	Plasma Membrane	transmembrane receptor	5.72628e-05	1.70817e-06	up	3.57375	3.57375	1.83744	196
Cell Death and Survival	cell death	2.65e-19		1.225	PLK2	polo like kinase 2	Nucleus	kinase	0.00010572	9.37622e-06	down	2.12728	-2.12728	-1.08901	196
Cell Death and Survival	cell death	2.65e-19		1.225	PNP	purine nucleoside phosphorylase	Nucleus	enzyme	0.000136714	1.65212e-05	up	2.01143	2.01143	1.00822	196
Cell Death and Survival	cell death	2.65e-19		1.225	PPIA	peptidylprolyl isomerase A	Cytoplasm	enzyme	0.000213482	3.91661e-05	down	3.11421	-3.11421	-1.63887	196
Cell Death and Survival	cell death	2.65e-19		1.225	PPIF	peptidylprolyl isomerase F	Cytoplasm	enzyme	0.000117299	1.19067e-05	up	2.2634	2.2634	1.17849	196
Cell Death and Survival	cell death	2.65e-19		1.225	PPP1R9A	protein phosphatase 1 regulatory subunit 9A	Plasma Membrane	other	4.38315e-05	5.85554e-07	down	2.17687	-2.17687	-1.12225	196
Cell Death and Survival	cell death	2.65e-19		1.225	PPP2R1B	protein phosphatase 2 regulatory subunit A, beta	Plasma Membrane	phosphatase	0.00054298	0.000223565	down	3.20601	-3.20601	-1.68078	196
Cell Death and Survival	cell death	2.65e-19		1.225	PRDX3	peroxiredoxin 3	Cytoplasm	enzyme	3.70634e-05	2.96236e-07	down	2.10772	-2.10772	-1.07569	196
Cell Death and Survival	cell death	2.65e-19		1.225	PRKAA1	protein kinase AMP-activated catalytic subunit alpha 1	Cytoplasm	kinase	0.00048552	0.000183941	down	2.44451	-2.44451	-1.28954	196
Cell Death and Survival	cell death	2.65e-19		1.225	PRKAR2B	protein kinase cAMP-dependent type II regulatory subunit beta	Cytoplasm	kinase	0.000487765	0.000185126	down	3.53523	-3.53523	-1.8218	196
Cell Death and Survival	cell death	2.65e-19		1.225	PROCR	protein C receptor	Plasma Membrane	other	4.80549e-05	8.55968e-07	down	2.18783	-2.18783	-1.1295	196
Cell Death and Survival	cell death	2.65e-19		1.225	PTCH1	patched 1	Plasma Membrane	transmembrane receptor	0.000788746	0.000423282	down	2.08064	-2.08064	-1.05703	196
Cell Death and Survival	cell death	2.65e-19		1.225	PTGER2	prostaglandin E receptor 2	Plasma Membrane	G-protein coupled receptor	0.000252601	5.47139e-05	down	2.17697	-2.17697	-1.12232	196
Cell Death and Survival	cell death	2.65e-19		1.225	PTGIS	prostaglandin I2 (prostacyclin) synthase	Cytoplasm	enzyme	0.00012705	1.42352e-05	down	2.49963	-2.49963	-1.32171	196
Cell Death and Survival	cell death	2.65e-19		1.225	PTGS1	prostaglandin-endoperoxide synthase 1	Cytoplasm	enzyme	0.000467757	0.000172084	up	2.1589	2.1589	1.1103	196
Cell Death and Survival	cell death	2.65e-19		1.225	PTPN13	protein tyrosine phosphatase, non-receptor type 13	Cytoplasm	phosphatase	0.00056923	0.000241718	down	2.30453	-2.30453	-1.20447	196
Cell Death and Survival	cell death	2.65e-19		1.225	PTPRR	protein tyrosine phosphatase, receptor type R	Plasma Membrane	phosphatase	0.000304557	7.97384e-05	up	2.32023	2.32023	1.21427	196
Cell Death and Survival	cell death	2.65e-19		1.225	RAP1A	RAP1A, member of RAS oncogene family	Cytoplasm	enzyme	5.67199e-05	1.48871e-06	up	2.16819	2.16819	1.11649	196
Cell Death and Survival	cell death	2.65e-19		1.225	RBM43	RNA binding motif protein 43	Other	other	0.000911071	0.000532307	down	2.49965	-2.49965	-1.32173	196
Cell Death and Survival	cell death	2.65e-19		1.225	RCAN1	regulator of calcineurin 1	Nucleus	transcription regulator	7.03519e-05	3.19708e-06	up	2.17179	2.17179	1.11888	196
Cell Death and Survival	cell death	2.65e-19		1.225	RDH10	retinol dehydrogenase 10 (all-trans)	Nucleus	enzyme	0.00180195	0.00137543	down	3.43556	-3.43556	-1.78055	196
Cell Death and Survival	cell death	2.65e-19		1.225	RGS3	regulator of G-protein signaling 3	Nucleus	other	0.00146999	0.00106616	up	2.21155	2.21155	1.14506	196
Cell Death and Survival	cell death	2.65e-19		1.225	RGS4	regulator of G-protein signaling 4	Cytoplasm	other	4.9534e-05	9.97018e-07	up	2.89909	2.89909	1.5356	196
Cell Death and Survival	cell death	2.65e-19		1.225	RHOB	ras homolog family member B	Cytoplasm	enzyme	6.81397e-05	2.79312e-06	down	3.93244	-3.93244	-1.97543	196
Cell Death and Survival	cell death	2.65e-19		1.225	RPS6KA5	ribosomal protein S6 kinase A5	Nucleus	kinase	0.000896053	0.000519236	up	2.57033	2.57033	1.36195	196
Cell Death and Survival	cell death	2.65e-19		1.225	RPSA	ribosomal protein SA	Cytoplasm	translation regulator	4.9534e-05	1.00921e-06	up	4.16121	4.16121	2.057	196
Cell Death and Survival	cell death	2.65e-19		1.225	S1PR1	sphingosine-1-phosphate receptor 1	Plasma Membrane	G-protein coupled receptor	1.48349e-06	3.38774e-10	down	7.79723	-7.79723	-2.96296	196
Cell Death and Survival	cell death	2.65e-19		1.225	SAA1	serum amyloid A1	Extracellular Space	transporter	7.47863e-05	4.10752e-06	up	2.96712	2.96712	1.56907	196
Cell Death and Survival	cell death	2.65e-19		1.225	SCG5	secretogranin V	Extracellular Space	other	4.9534e-05	1.00408e-06	up	4.95408	4.95408	2.30862	196
Cell Death and Survival	cell death	2.65e-19		1.225	SCLY	selenocysteine lyase	Cytoplasm	enzyme	0.000257527	5.66631e-05	down	2.85702	-2.85702	-1.51451	196
Cell Death and Survival	cell death	2.65e-19		1.225	SEMA3A	semaphorin 3A	Extracellular Space	other	0.000519394	0.000207155	up	2.7446	2.7446	1.4566	196
Cell Death and Survival	cell death	2.65e-19		1.225	SEMA6A	semaphorin 6A	Plasma Membrane	transmembrane receptor	0.000689694	0.000340277	down	2.06704	-2.06704	-1.04756	196
Cell Death and Survival	cell death	2.65e-19		1.225	SEMA7A	semaphorin 7A (John Milton Hagen blood group)	Plasma Membrane	transmembrane receptor	7.21903e-05	3.52387e-06	up	3.20441	3.20441	1.68006	196
Cell Death and Survival	cell death	2.65e-19		1.225	SEP15	15 kDa selenoprotein	Cytoplasm	enzyme	3.19575e-05	1.09469e-07	down	2.56349	-2.56349	-1.35811	196
Cell Death and Survival	cell death	2.65e-19		1.225	SERP1	stress-associated endoplasmic reticulum protein 1	Cytoplasm	other	7.47863e-05	4.12444e-06	up	3.26233	3.26233	1.7059	196
Cell Death and Survival	cell death	2.65e-19		1.225	SERPINB2	serpin family B member 2	Extracellular Space	other	0.00148016	0.00107657	up	4.30458	4.30458	2.10587	196
Cell Death and Survival	cell death	2.65e-19		1.225	SFRP4	secreted frizzled related protein 4	Plasma Membrane	transmembrane receptor	0.00117179	0.000782337	down	2.0725	-2.0725	-1.05137	196
Cell Death and Survival	cell death	2.65e-19		1.225	SLC17A5	solute carrier family 17 member 5	Plasma Membrane	transporter	8.493e-05	5.90056e-06	up	2.78165	2.78165	1.47594	196
Cell Death and Survival	cell death	2.65e-19		1.225	SLC19A2	solute carrier family 19 member 2	Plasma Membrane	transporter	0.000225409	4.33162e-05	up	2.20476	2.20476	1.14062	196
Cell Death and Survival	cell death	2.65e-19		1.225	SLC1A3	solute carrier family 1 member 3	Plasma Membrane	transporter	0.000666537	0.000319893	up	2.92206	2.92206	1.54699	196
Cell Death and Survival	cell death	2.65e-19		1.225	SLC6A6	solute carrier family 6 member 6	Plasma Membrane	transporter	0.000127232	1.43531e-05	down	2.39218	-2.39218	-1.25833	196
Cell Death and Survival	cell death	2.65e-19		1.225	SLC7A11	solute carrier family 7 member 11	Plasma Membrane	transporter	7.00793e-05	3.12327e-06	up	2.30715	2.30715	1.20611	196
Cell Death and Survival	cell death	2.65e-19		1.225	SNAP25	synaptosome associated protein 25kDa	Plasma Membrane	transporter	0.000114304	1.12265e-05	down	2.84358	-2.84358	-1.50771	196
Cell Death and Survival	cell death	2.65e-19		1.225	SOAT1	sterol O-acyltransferase 1	Cytoplasm	enzyme	0.00010086	8.59989e-06	down	2.14992	-2.14992	-1.10428	196
Cell Death and Survival	cell death	2.65e-19		1.225	SOD2	superoxide dismutase 2, mitochondrial	Cytoplasm	enzyme	5.71384e-05	1.58904e-06	up	2.2088	2.2088	1.14326	196
Cell Death and Survival	cell death	2.65e-19		1.225	SPRY2	sprouty RTK signaling antagonist 2	Plasma Membrane	other	0.000410306	0.000136093	up	2.82721	2.82721	1.49938	196
Cell Death and Survival	cell death	2.65e-19		1.225	SRI	sorcin	Cytoplasm	transporter	5.67199e-05	1.5399e-06	down	3.03755	-3.03755	-1.60291	196
Cell Death and Survival	cell death	2.65e-19		1.225	STAT1	signal transducer and activator of transcription 1	Nucleus	transcription regulator	0.000127302	1.44319e-05	down	2.48387	-2.48387	-1.31259	196
Cell Death and Survival	cell death	2.65e-19		1.225	STC1	stanniocalcin 1	Extracellular Space	kinase	0.000278723	6.72781e-05	up	2.19527	2.19527	1.1344	196
Cell Death and Survival	cell death	2.65e-19		1.225	STK17B	serine/threonine kinase 17b	Nucleus	kinase	7.88016e-05	4.85087e-06	up	2.06719	2.06719	1.04767	196
Cell Death and Survival	cell death	2.65e-19		1.225	SUSD6	sushi domain containing 6	Other	other	5.71384e-05	1.61585e-06	up	2.39685	2.39685	1.26114	196
Cell Death and Survival	cell death	2.65e-19		1.225	SWAP70	SWAP switching B-cell complex 70kDa subunit	Cytoplasm	other	5.71384e-05	1.62624e-06	down	2.19703	-2.19703	-1.13556	196
Cell Death and Survival	cell death	2.65e-19		1.225	TAB2	TGF-beta activated kinase 1/MAP3K7 binding protein 2	Cytoplasm	other	7.07354e-05	3.22612e-06	down	2.16795	-2.16795	-1.11633	196
Cell Death and Survival	cell death	2.65e-19		1.225	TAF9B	TATA-box binding protein associated factor 9b	Nucleus	transcription regulator	6.88576e-05	2.9817e-06	down	2.4706	-2.4706	-1.30486	196
Cell Death and Survival	cell death	2.65e-19		1.225	TAP1	transporter 1, ATP-binding cassette, sub-family B (MDR/TAP)	Cytoplasm	transporter	4.66557e-05	7.245e-07	up	2.08292	2.08292	1.05861	196
Cell Death and Survival	cell death	2.65e-19		1.225	TERF1	telomeric repeat binding factor 1	Nucleus	other	8.51936e-05	5.98124e-06	down	2.0612	-2.0612	-1.04349	196
Cell Death and Survival	cell death	2.65e-19		1.225	THBD	thrombomodulin	Plasma Membrane	transmembrane receptor	8.17504e-05	5.46994e-06	up	3.21574	3.21574	1.68515	196
Cell Death and Survival	cell death	2.65e-19		1.225	THRB	thyroid hormone receptor beta	Nucleus	ligand-dependent nuclear receptor	0.000438312	0.000152593	down	3.65533	-3.65533	-1.87	196
Cell Death and Survival	cell death	2.65e-19		1.225	TLR2	toll like receptor 2	Plasma Membrane	transmembrane receptor	8.09449e-05	5.23963e-06	up	4.16405	4.16405	2.05799	196
Cell Death and Survival	cell death	2.65e-19		1.225	TMEM158	transmembrane protein 158 (gene/pseudogene)	Plasma Membrane	other	5.23957e-05	1.25439e-06	up	2.73725	2.73725	1.45273	196
Cell Death and Survival	cell death	2.65e-19		1.225	TNF	tumor necrosis factor	Extracellular Space	cytokine	0.000291147	7.31026e-05	up	2.74571	2.74571	1.45718	196
Cell Death and Survival	cell death	2.65e-19		1.225	TNFAIP3	TNF alpha induced protein 3	Nucleus	enzyme	4.63841e-05	6.73483e-07	up	3.2656	3.2656	1.70735	196
Cell Death and Survival	cell death	2.65e-19		1.225	TNFRSF19	tumor necrosis factor receptor superfamily member 19	Plasma Membrane	transmembrane receptor	7.83021e-05	4.53929e-06	down	3.32882	-3.32882	-1.73501	196
Cell Death and Survival	cell death	2.65e-19		1.225	TPD52	tumor protein D52	Cytoplasm	other	3.65159e-05	2.46409e-07	down	2.27479	-2.27479	-1.18573	196
Cell Death and Survival	cell death	2.65e-19		1.225	TRAF1	TNF receptor associated factor 1	Cytoplasm	other	7.2424e-05	3.63029e-06	up	5.55985	5.55985	2.47505	196
Cell Death and Survival	cell death	2.65e-19		1.225	TSPAN2	tetraspanin 2	Extracellular Space	other	7.55498e-05	4.17517e-06	down	2.36973	-2.36973	-1.24472	196
Cell Death and Survival	cell death	2.65e-19		1.225	UBE2N	ubiquitin conjugating enzyme E2 N	Cytoplasm	enzyme	0.000101046	8.66474e-06	down	2.23654	-2.23654	-1.16127	196
Cell Death and Survival	cell death	2.65e-19		1.225	UCP2	uncoupling protein 2	Cytoplasm	transporter	0.000212663	3.87543e-05	down	2.04574	-2.04574	-1.03262	196
Cell Death and Survival	cell death	2.65e-19		1.225	UNG	uracil DNA glycosylase	Nucleus	enzyme	0.000545803	0.000225773	down	2.10693	-2.10693	-1.07514	196
Cell Death and Survival	cell death	2.65e-19		1.225	VAV3	vav guanine nucleotide exchange factor 3	Extracellular Space	cytokine	9.63321e-05	7.8327e-06	down	8.02289	-8.02289	-3.00412	196
Cell Death and Survival	cell death	2.65e-19		1.225	VDR	vitamin D (1,25- dihydroxyvitamin D3) receptor	Nucleus	transcription regulator	0.000664155	0.000317745	up	3.17167	3.17167	1.66524	196
Cell Death and Survival	cell death	2.65e-19		1.225	VEGFC	vascular endothelial growth factor C	Extracellular Space	growth factor	4.25833e-05	4.70028e-07	up	2.6596	2.6596	1.41121	196
Cell Death and Survival	cell death	2.65e-19		1.225	WNT5A	Wnt family member 5A	Extracellular Space	cytokine	9.09658e-05	6.84293e-06	up	3.07702	3.07702	1.62154	196
Cell Death and Survival	cell death	2.65e-19		1.225	WSB1	WD repeat and SOCS box containing 1	Other	other	0.000514457	0.000202834	down	2.31514	-2.31514	-1.2111	196
Cell Death and Survival	cell death	2.65e-19		1.225	XDH	xanthine dehydrogenase	Cytoplasm	enzyme	0.000240351	4.90388e-05	up	2.04405	2.04405	1.03143	196
Cell Death and Survival	cell death	2.65e-19		1.225	XPR1	xenotropic and polytropic retrovirus receptor 1	Plasma Membrane	G-protein coupled receptor	0.000234311	4.64716e-05	down	3.06335	-3.06335	-1.61511	196
Cell Death and Survival	cell death	2.65e-19		1.225	ZAK	sterile alpha motif and leucine zipper containing kinase AZK	Cytoplasm	kinase	4.9534e-05	9.30809e-07	down	3.37023	-3.37023	-1.75285	196
Cell Death and Survival	necrosis	4.1e-19		0.438	ACKR3	atypical chemokine receptor 3	Plasma Membrane	G-protein coupled receptor	0.00018251	2.96362e-05	up	2.02777	2.02777	1.0199	165
Cell Death and Survival	necrosis	4.1e-19		0.438	ADORA2B	adenosine A2b receptor	Plasma Membrane	G-protein coupled receptor	0.000155574	2.11387e-05	up	2.26916	2.26916	1.18216	165
Cell Death and Survival	necrosis	4.1e-19		0.438	AIMP1	aminoacyl tRNA synthetase complex-interacting multifunctional protein 1	Extracellular Space	cytokine	0.00061013	0.000272183	down	2.17524	-2.17524	-1.12117	165
Cell Death and Survival	necrosis	4.1e-19		0.438	ALDH1A1	aldehyde dehydrogenase 1 family member A1	Cytoplasm	enzyme	4.38315e-05	5.73166e-07	down	3.45275	-3.45275	-1.78775	165
Cell Death and Survival	necrosis	4.1e-19		0.438	AMACR	alpha-methylacyl-CoA racemase	Cytoplasm	enzyme	0.000457031	0.000164694	down	2.48248	-2.48248	-1.31178	165
Cell Death and Survival	necrosis	4.1e-19		0.438	ANTXR2	anthrax toxin receptor 2	Plasma Membrane	transmembrane receptor	5.23957e-05	1.20403e-06	up	5.25029	5.25029	2.3924	165
Cell Death and Survival	necrosis	4.1e-19		0.438	AREG	amphiregulin	Extracellular Space	growth factor	0.00030687	8.06945e-05	up	2.63063	2.63063	1.39541	165
Cell Death and Survival	necrosis	4.1e-19		0.438	ARG2	arginase 2	Cytoplasm	enzyme	0.000291983	7.3746e-05	up	2.06061	2.06061	1.04307	165
Cell Death and Survival	necrosis	4.1e-19		0.438	ARID3B	AT-rich interaction domain 3B	Nucleus	transcription regulator	6.27081e-05	2.39932e-06	up	2.2713	2.2713	1.18352	165
Cell Death and Survival	necrosis	4.1e-19		0.438	ARTN	artemin	Extracellular Space	growth factor	0.000206984	3.7069e-05	down	2.07866	-2.07866	-1.05565	165
Cell Death and Survival	necrosis	4.1e-19		0.438	BCL2A1	BCL2 related protein A1	Cytoplasm	other	2.49541e-05	4.55887e-08	up	11.3611	11.3611	3.50603	165
Cell Death and Survival	necrosis	4.1e-19		0.438	BRINP1	BMP/retinoic acid inducible neural specific 1	Nucleus	peptidase	0.000163502	2.30561e-05	down	2.51468	-2.51468	-1.33037	165
Cell Death and Survival	necrosis	4.1e-19		0.438	C3	complement component 3	Extracellular Space	peptidase	0.000166276	2.38974e-05	up	3.15758	3.15758	1.65882	165
Cell Death and Survival	necrosis	4.1e-19		0.438	CCL2	C-C motif chemokine ligand 2	Extracellular Space	cytokine	5.71384e-05	1.64325e-06	up	4.18932	4.18932	2.06672	165
Cell Death and Survival	necrosis	4.1e-19		0.438	CCL5	C-C motif chemokine ligand 5	Extracellular Space	cytokine	0.000244253	5.08419e-05	up	3.69923	3.69923	1.88723	165
Cell Death and Survival	necrosis	4.1e-19		0.438	CCNG1	cyclin G1	Nucleus	other	5.23957e-05	1.25288e-06	down	2.53544	-2.53544	-1.34224	165
Cell Death and Survival	necrosis	4.1e-19		0.438	CD40	CD40 molecule	Plasma Membrane	transmembrane receptor	9.69248e-05	8.01981e-06	up	2.53917	2.53917	1.34436	165
Cell Death and Survival	necrosis	4.1e-19		0.438	CD82	CD82 molecule	Plasma Membrane	other	0.000155574	2.11222e-05	up	2.66006	2.66006	1.41146	165
Cell Death and Survival	necrosis	4.1e-19		0.438	CDA	cytidine deaminase	Nucleus	enzyme	0.000722094	0.000367313	up	2.01104	2.01104	1.00794	165
Cell Death and Survival	necrosis	4.1e-19		0.438	CDH6	cadherin 6	Plasma Membrane	other	5.28114e-05	1.29647e-06	down	2.96946	-2.96946	-1.5702	165
Cell Death and Survival	necrosis	4.1e-19		0.438	CDKN1A	cyclin-dependent kinase inhibitor 1A	Nucleus	kinase	0.000177018	2.76906e-05	up	2.34183	2.34183	1.22764	165
Cell Death and Survival	necrosis	4.1e-19		0.438	CDKN1C	cyclin-dependent kinase inhibitor 1C	Nucleus	other	9.05642e-05	6.78352e-06	down	2.73683	-2.73683	-1.45251	165
Cell Death and Survival	necrosis	4.1e-19		0.438	CERS6	ceramide synthase 6	Nucleus	transcription regulator	0.000239634	4.85159e-05	down	2.09715	-2.09715	-1.06843	165
Cell Death and Survival	necrosis	4.1e-19		0.438	COPB2	coatomer protein complex subunit beta 2	Cytoplasm	transporter	9.63321e-05	7.85242e-06	down	2.97235	-2.97235	-1.5716	165
Cell Death and Survival	necrosis	4.1e-19		0.438	CSF2	colony stimulating factor 2	Extracellular Space	cytokine	0.000181511	2.91396e-05	up	3.2134	3.2134	1.6841	165
Cell Death and Survival	necrosis	4.1e-19		0.438	CTSS	cathepsin S	Cytoplasm	peptidase	0.000531564	0.000215648	up	3.37352	3.37352	1.75426	165
Cell Death and Survival	necrosis	4.1e-19		0.438	CXCL1	C-X-C motif chemokine ligand 1	Extracellular Space	cytokine	7.2018e-05	3.46222e-06	up	2.66667	2.66667	1.41504	165
Cell Death and Survival	necrosis	4.1e-19		0.438	CXCL11	C-X-C motif chemokine ligand 11	Other	cytokine	0.000621227	0.000282085	up	2.52305	2.52305	1.33517	165
Cell Death and Survival	necrosis	4.1e-19		0.438	CXCL2	C-X-C motif chemokine ligand 2	Extracellular Space	cytokine	7.29755e-05	3.81133e-06	up	2.98142	2.98142	1.576	165
Cell Death and Survival	necrosis	4.1e-19		0.438	CXCL3	C-X-C motif chemokine ligand 3	Extracellular Space	cytokine	0.000453284	0.000162494	up	3.10131	3.10131	1.63288	165
Cell Death and Survival	necrosis	4.1e-19		0.438	CXCL8	C-X-C motif chemokine ligand 8	Extracellular Space	cytokine	4.70395e-05	7.41202e-07	up	6.01014	6.01014	2.5874	165
Cell Death and Survival	necrosis	4.1e-19		0.438	CYB5R4	cytochrome b5 reductase 4	Cytoplasm	enzyme	4.63841e-05	6.92223e-07	down	2.04363	-2.04363	-1.03113	165
Cell Death and Survival	necrosis	4.1e-19		0.438	CYLD	CYLD lysine 63 deubiquitinase	Nucleus	transcription regulator	5.67199e-05	1.53037e-06	up	2.37536	2.37536	1.24815	165
Cell Death and Survival	necrosis	4.1e-19		0.438	DDX58	DEXD/H-box helicase 58	Cytoplasm	enzyme	7.88016e-05	4.63882e-06	up	2.39664	2.39664	1.26101	165
Cell Death and Survival	necrosis	4.1e-19		0.438	DUSP6	dual specificity phosphatase 6	Cytoplasm	phosphatase	4.05507e-05	3.60207e-07	up	4.36083	4.36083	2.1246	165
Cell Death and Survival	necrosis	4.1e-19		0.438	DUT	deoxyuridine triphosphatase	Nucleus	enzyme	0.000180774	2.89799e-05	down	3.33942	-3.33942	-1.7396	165
Cell Death and Survival	necrosis	4.1e-19		0.438	EGLN3	egl-9 family hypoxia-inducible factor 3	Cytoplasm	enzyme	0.000151048	1.99892e-05	down	2.79284	-2.79284	-1.48173	165
Cell Death and Survival	necrosis	4.1e-19		0.438	EGR1	early growth response 1	Nucleus	transcription regulator	0.000910266	0.000531525	down	2.02311	-2.02311	-1.01658	165
Cell Death and Survival	necrosis	4.1e-19		0.438	EMP1	epithelial membrane protein 1	Plasma Membrane	other	7.2018e-05	3.47547e-06	up	3.52521	3.52521	1.81771	165
Cell Death and Survival	necrosis	4.1e-19		0.438	ETS1	ETS proto-oncogene 1, transcription factor	Nucleus	transcription regulator	0.000727446	0.000371116	up	2.14953	2.14953	1.10402	165
Cell Death and Survival	necrosis	4.1e-19		0.438	F3	coagulation factor III, tissue factor	Plasma Membrane	transmembrane receptor	0.000167293	2.45862e-05	up	2.83358	2.83358	1.50263	165
Cell Death and Survival	necrosis	4.1e-19		0.438	FBXO32	F-box protein 32	Cytoplasm	enzyme	0.000134066	1.59195e-05	up	2.08519	2.08519	1.06018	165
Cell Death and Survival	necrosis	4.1e-19		0.438	FGF1	fibroblast growth factor 1	Extracellular Space	growth factor	0.000689416	0.000339749	up	2.7327	2.7327	1.45033	165
Cell Death and Survival	necrosis	4.1e-19		0.438	FGF5	fibroblast growth factor 5	Extracellular Space	growth factor	3.65159e-05	2.83522e-07	up	3.22383	3.22383	1.68878	165
Cell Death and Survival	necrosis	4.1e-19		0.438	FGFR2	fibroblast growth factor receptor 2	Plasma Membrane	kinase	0.000292993	7.4204e-05	down	4.45302	-4.45302	-2.15478	165
Cell Death and Survival	necrosis	4.1e-19		0.438	G0S2	G0/G1 switch 2	Cytoplasm	other	4.86622e-05	8.94566e-07	up	2.78473	2.78473	1.47754	165
Cell Death and Survival	necrosis	4.1e-19		0.438	GAB1	GRB2 associated binding protein 1	Cytoplasm	kinase	0.000120758	1.28231e-05	down	2.38756	-2.38756	-1.25554	165
Cell Death and Survival	necrosis	4.1e-19		0.438	GALNT3	polypeptide N-acetylgalactosaminyltransferase 3	Cytoplasm	enzyme	6.1152e-05	2.17153e-06	up	2.46405	2.46405	1.30103	165
Cell Death and Survival	necrosis	4.1e-19		0.438	GDF15	growth differentiation factor 15	Extracellular Space	growth factor	0.00194823	0.00151467	up	2.20534	2.20534	1.141	165
Cell Death and Survival	necrosis	4.1e-19		0.438	GEM	GTP binding protein overexpressed in skeletal muscle	Plasma Membrane	enzyme	0.000122297	1.31545e-05	up	2.14791	2.14791	1.10294	165
Cell Death and Survival	necrosis	4.1e-19		0.438	GJB2	gap junction protein beta 2	Plasma Membrane	transporter	4.21674e-05	4.2607e-07	up	2.38678	2.38678	1.25507	165
Cell Death and Survival	necrosis	4.1e-19		0.438	HAS2	hyaluronan synthase 2	Plasma Membrane	enzyme	8.96643e-05	6.63704e-06	up	2.84304	2.84304	1.50743	165
Cell Death and Survival	necrosis	4.1e-19		0.438	HBEGF	heparin binding EGF like growth factor	Extracellular Space	growth factor	0.000324605	9.06211e-05	up	2.92802	2.92802	1.54993	165
Cell Death and Survival	necrosis	4.1e-19		0.438	HERPUD1	homocysteine inducible ER protein with ubiquitin like domain 1	Cytoplasm	other	6.854e-05	2.87996e-06	up	3.03957	3.03957	1.60387	165
Cell Death and Survival	necrosis	4.1e-19		0.438	HIPK2	homeodomain interacting protein kinase 2	Nucleus	kinase	4.76218e-05	8.20133e-07	down	3.90758	-3.90758	-1.96627	165
Cell Death and Survival	necrosis	4.1e-19		0.438	HMGA2	high mobility group AT-hook 2	Nucleus	enzyme	7.36928e-05	3.96405e-06	up	2.57121	2.57121	1.36245	165
Cell Death and Survival	necrosis	4.1e-19		0.438	HMOX1	heme oxygenase 1	Cytoplasm	enzyme	3.07978e-05	1.0198e-07	up	7.17615	7.17615	2.84321	165
Cell Death and Survival	necrosis	4.1e-19		0.438	HSPA9	heat shock protein family A (Hsp70) member 9	Cytoplasm	other	5.12481e-05	1.15744e-06	down	2.64295	-2.64295	-1.40215	165
Cell Death and Survival	necrosis	4.1e-19		0.438	ICAM1	intercellular adhesion molecule 1	Plasma Membrane	transmembrane receptor	4.25833e-05	4.82261e-07	up	4.88337	4.88337	2.28788	165
Cell Death and Survival	necrosis	4.1e-19		0.438	ID1	inhibitor of DNA binding 1, HLH protein	Nucleus	transcription regulator	6.27081e-05	2.40082e-06	down	2.32483	-2.32483	-1.21713	165
Cell Death and Survival	necrosis	4.1e-19		0.438	IFIH1	interferon induced with helicase C domain 1	Nucleus	enzyme	6.05334e-05	2.0177e-06	up	2.86486	2.86486	1.51846	165
Cell Death and Survival	necrosis	4.1e-19		0.438	IGFBP3	insulin like growth factor binding protein 3	Extracellular Space	other	2.3646e-05	3.67681e-08	down	2.30432	-2.30432	-1.20434	165
Cell Death and Survival	necrosis	4.1e-19		0.438	IL6	interleukin 6	Extracellular Space	cytokine	3.65159e-05	2.68298e-07	up	2.78882	2.78882	1.47965	165
Cell Death and Survival	necrosis	4.1e-19		0.438	INHBA	inhibin beta A	Extracellular Space	growth factor	6.18657e-05	2.29577e-06	up	3.71771	3.71771	1.89441	165
Cell Death and Survival	necrosis	4.1e-19		0.438	IRAK2	interleukin 1 receptor associated kinase 2	Plasma Membrane	kinase	0.000118827	1.23196e-05	up	3.36683	3.36683	1.75139	165
Cell Death and Survival	necrosis	4.1e-19		0.438	IRF9	interferon regulatory factor 9	Nucleus	transcription regulator	0.000133447	1.57552e-05	up	2.37847	2.37847	1.25003	165
Cell Death and Survival	necrosis	4.1e-19		0.438	ISM1	isthmin 1, angiogenesis inhibitor	Other	other	5.59787e-05	1.4284e-06	up	3.52491	3.52491	1.81758	165
Cell Death and Survival	necrosis	4.1e-19		0.438	ITGA2	integrin subunit alpha 2	Plasma Membrane	transmembrane receptor	0.000106124	9.61516e-06	up	4.46447	4.46447	2.15849	165
Cell Death and Survival	necrosis	4.1e-19		0.438	KCNK3	potassium two pore domain channel subfamily K member 3	Plasma Membrane	ion channel	0.00040766	0.000134693	up	2.22179	2.22179	1.15172	165
Cell Death and Survival	necrosis	4.1e-19		0.438	KITLG	KIT ligand	Extracellular Space	growth factor	3.70634e-05	2.92673e-07	down	2.80656	-2.80656	-1.4888	165
Cell Death and Survival	necrosis	4.1e-19		0.438	KLF4	Kruppel-like factor 4 (gut)	Nucleus	transcription regulator	8.10095e-05	5.36545e-06	up	3.086	3.086	1.62574	165
Cell Death and Survival	necrosis	4.1e-19		0.438	LRIG1	leucine-rich repeats and immunoglobulin like domains 1	Extracellular Space	other	0.000368078	0.000112928	up	2.6276	2.6276	1.39375	165
Cell Death and Survival	necrosis	4.1e-19		0.438	LTB	lymphotoxin beta	Extracellular Space	cytokine	0.000325041	9.10768e-05	up	3.23391	3.23391	1.69328	165
Cell Death and Survival	necrosis	4.1e-19		0.438	MAP3K1	mitogen-activated protein kinase kinase kinase 1	Cytoplasm	kinase	0.000104164	9.08987e-06	down	2.99182	-2.99182	-1.58102	165
Cell Death and Survival	necrosis	4.1e-19		0.438	MAVS	mitochondrial antiviral signaling protein	Cytoplasm	other	0.001397	0.000996787	down	2.47268	-2.47268	-1.30607	165
Cell Death and Survival	necrosis	4.1e-19		0.438	MCU	mitochondrial calcium uniporter	Cytoplasm	ion channel	6.08588e-05	2.15417e-06	down	2.31706	-2.31706	-1.2123	165
Cell Death and Survival	necrosis	4.1e-19		0.438	MEF2D	myocyte enhancer factor 2D	Nucleus	transcription regulator	0.000102885	8.85955e-06	up	2.07063	2.07063	1.05007	165
Cell Death and Survival	necrosis	4.1e-19		0.438	MIR17HG	miR-17-92a-1 cluster host gene	Other	other	0.000810491	0.000443466	down	2.15606	-2.15606	-1.1084	165
Cell Death and Survival	necrosis	4.1e-19		0.438	MLKL	mixed lineage kinase domain-like	Cytoplasm	kinase	8.59099e-05	6.10447e-06	up	2.02262	2.02262	1.01622	165
Cell Death and Survival	necrosis	4.1e-19		0.438	MMP1	matrix metallopeptidase 1	Extracellular Space	peptidase	2.99009e-05	6.82824e-08	up	3.68258	3.68258	1.88072	165
Cell Death and Survival	necrosis	4.1e-19		0.438	MMP14	matrix metallopeptidase 14	Extracellular Space	peptidase	5.71384e-05	1.58188e-06	up	2.21198	2.21198	1.14534	165
Cell Death and Survival	necrosis	4.1e-19		0.438	MMP7	matrix metallopeptidase 7	Extracellular Space	peptidase	0.000324617	9.07357e-05	down	4.18581	-4.18581	-2.06551	165
Cell Death and Survival	necrosis	4.1e-19		0.438	MMP9	matrix metallopeptidase 9	Extracellular Space	peptidase	0.000105861	9.4402e-06	up	5.58648	5.58648	2.48194	165
Cell Death and Survival	necrosis	4.1e-19		0.438	MTPN	myotrophin	Nucleus	transcription regulator	0.000241371	4.95333e-05	down	2.30585	-2.30585	-1.2053	165
Cell Death and Survival	necrosis	4.1e-19		0.438	MXI1	MAX interactor 1, dimerization protein	Nucleus	transcription regulator	0.000287699	7.17973e-05	down	3.20286	-3.20286	-1.67936	165
Cell Death and Survival	necrosis	4.1e-19		0.438	NCF2	neutrophil cytosolic factor 2	Cytoplasm	enzyme	0.000241371	4.9582e-05	up	2.83754	2.83754	1.50464	165
Cell Death and Survival	necrosis	4.1e-19		0.438	NDEL1	nudE neurodevelopment protein 1 like 1	Nucleus	other	9.02543e-05	6.7397e-06	up	2.10114	2.10114	1.07117	165
Cell Death and Survival	necrosis	4.1e-19		0.438	NEFL	neurofilament, light polypeptide	Cytoplasm	other	0.00012962	1.49185e-05	down	2.57733	-2.57733	-1.36588	165
Cell Death and Survival	necrosis	4.1e-19		0.438	NFYA	nuclear transcription factor Y subunit alpha	Nucleus	transcription regulator	0.000230974	4.52045e-05	down	2.1825	-2.1825	-1.12598	165
Cell Death and Survival	necrosis	4.1e-19		0.438	NLRP3	NLR family, pyrin domain containing 3	Cytoplasm	other	0.000235207	4.68615e-05	up	3.66524	3.66524	1.87391	165
Cell Death and Survival	necrosis	4.1e-19		0.438	NT5E	5'-nucleotidase ecto	Plasma Membrane	phosphatase	8.09449e-05	5.25908e-06	up	3.37637	3.37637	1.75547	165
Cell Death and Survival	necrosis	4.1e-19		0.438	OAS3	2'-5'-oligoadenylate synthetase 3	Cytoplasm	enzyme	0.000375918	0.00011733	up	2.42183	2.42183	1.2761	165
Cell Death and Survival	necrosis	4.1e-19		0.438	PDCD1LG2	programmed cell death 1 ligand 2	Plasma Membrane	enzyme	8.09449e-05	5.28019e-06	up	3.84934	3.84934	1.94461	165
Cell Death and Survival	necrosis	4.1e-19		0.438	PDZK1	PDZ domain containing 1	Plasma Membrane	transporter	3.59123e-05	1.64283e-07	down	4.64588	-4.64588	-2.21595	165
Cell Death and Survival	necrosis	4.1e-19		0.438	PHB2	prohibitin 2	Cytoplasm	transcription regulator	8.50289e-05	5.93702e-06	down	2.19986	-2.19986	-1.13741	165
Cell Death and Survival	necrosis	4.1e-19		0.438	PHLDA1	pleckstrin homology like domain family A member 1	Cytoplasm	other	4.21674e-05	4.04011e-07	up	2.56874	2.56874	1.36106	165
Cell Death and Survival	necrosis	4.1e-19		0.438	PLA2G4A	phospholipase A2 group IVA	Cytoplasm	enzyme	0.000319621	8.78429e-05	up	2.0774	2.0774	1.05478	165
Cell Death and Survival	necrosis	4.1e-19		0.438	PLAC8	placenta specific 8	Nucleus	other	5.71384e-05	1.64277e-06	down	2.36696	-2.36696	-1.24304	165
Cell Death and Survival	necrosis	4.1e-19		0.438	PLAT	plasminogen activator, tissue type	Extracellular Space	peptidase	0.000324331	9.0357e-05	up	2.93037	2.93037	1.55108	165
Cell Death and Survival	necrosis	4.1e-19		0.438	PLAU	plasminogen activator, urokinase	Extracellular Space	peptidase	7.29755e-05	3.74487e-06	up	4.08751	4.08751	2.03122	165
Cell Death and Survival	necrosis	4.1e-19		0.438	PLAUR	plasminogen activator, urokinase receptor	Plasma Membrane	transmembrane receptor	5.72628e-05	1.70817e-06	up	3.57375	3.57375	1.83744	165
Cell Death and Survival	necrosis	4.1e-19		0.438	PLK2	polo like kinase 2	Nucleus	kinase	0.00010572	9.37622e-06	down	2.12728	-2.12728	-1.08901	165
Cell Death and Survival	necrosis	4.1e-19		0.438	PNP	purine nucleoside phosphorylase	Nucleus	enzyme	0.000136714	1.65212e-05	up	2.01143	2.01143	1.00822	165
Cell Death and Survival	necrosis	4.1e-19		0.438	PPIA	peptidylprolyl isomerase A	Cytoplasm	enzyme	0.000213482	3.91661e-05	down	3.11421	-3.11421	-1.63887	165
Cell Death and Survival	necrosis	4.1e-19		0.438	PPIF	peptidylprolyl isomerase F	Cytoplasm	enzyme	0.000117299	1.19067e-05	up	2.2634	2.2634	1.17849	165
Cell Death and Survival	necrosis	4.1e-19		0.438	PPP1R9A	protein phosphatase 1 regulatory subunit 9A	Plasma Membrane	other	4.38315e-05	5.85554e-07	down	2.17687	-2.17687	-1.12225	165
Cell Death and Survival	necrosis	4.1e-19		0.438	PPP2R1B	protein phosphatase 2 regulatory subunit A, beta	Plasma Membrane	phosphatase	0.00054298	0.000223565	down	3.20601	-3.20601	-1.68078	165
Cell Death and Survival	necrosis	4.1e-19		0.438	PRDX3	peroxiredoxin 3	Cytoplasm	enzyme	3.70634e-05	2.96236e-07	down	2.10772	-2.10772	-1.07569	165
Cell Death and Survival	necrosis	4.1e-19		0.438	PRKAA1	protein kinase AMP-activated catalytic subunit alpha 1	Cytoplasm	kinase	0.00048552	0.000183941	down	2.44451	-2.44451	-1.28954	165
Cell Death and Survival	necrosis	4.1e-19		0.438	PRKAR2B	protein kinase cAMP-dependent type II regulatory subunit beta	Cytoplasm	kinase	0.000487765	0.000185126	down	3.53523	-3.53523	-1.8218	165
Cell Death and Survival	necrosis	4.1e-19		0.438	PROCR	protein C receptor	Plasma Membrane	other	4.80549e-05	8.55968e-07	down	2.18783	-2.18783	-1.1295	165
Cell Death and Survival	necrosis	4.1e-19		0.438	PTCH1	patched 1	Plasma Membrane	transmembrane receptor	0.000788746	0.000423282	down	2.08064	-2.08064	-1.05703	165
Cell Death and Survival	necrosis	4.1e-19		0.438	PTGER2	prostaglandin E receptor 2	Plasma Membrane	G-protein coupled receptor	0.000252601	5.47139e-05	down	2.17697	-2.17697	-1.12232	165
Cell Death and Survival	necrosis	4.1e-19		0.438	PTGIS	prostaglandin I2 (prostacyclin) synthase	Cytoplasm	enzyme	0.00012705	1.42352e-05	down	2.49963	-2.49963	-1.32171	165
Cell Death and Survival	necrosis	4.1e-19		0.438	PTGS1	prostaglandin-endoperoxide synthase 1	Cytoplasm	enzyme	0.000467757	0.000172084	up	2.1589	2.1589	1.1103	165
Cell Death and Survival	necrosis	4.1e-19		0.438	PTPN13	protein tyrosine phosphatase, non-receptor type 13	Cytoplasm	phosphatase	0.00056923	0.000241718	down	2.30453	-2.30453	-1.20447	165
Cell Death and Survival	necrosis	4.1e-19		0.438	PTPRR	protein tyrosine phosphatase, receptor type R	Plasma Membrane	phosphatase	0.000304557	7.97384e-05	up	2.32023	2.32023	1.21427	165
Cell Death and Survival	necrosis	4.1e-19		0.438	RBM43	RNA binding motif protein 43	Other	other	0.000911071	0.000532307	down	2.49965	-2.49965	-1.32173	165
Cell Death and Survival	necrosis	4.1e-19		0.438	RCAN1	regulator of calcineurin 1	Nucleus	transcription regulator	7.03519e-05	3.19708e-06	up	2.17179	2.17179	1.11888	165
Cell Death and Survival	necrosis	4.1e-19		0.438	RDH10	retinol dehydrogenase 10 (all-trans)	Nucleus	enzyme	0.00180195	0.00137543	down	3.43556	-3.43556	-1.78055	165
Cell Death and Survival	necrosis	4.1e-19		0.438	RGS3	regulator of G-protein signaling 3	Nucleus	other	0.00146999	0.00106616	up	2.21155	2.21155	1.14506	165
Cell Death and Survival	necrosis	4.1e-19		0.438	RGS4	regulator of G-protein signaling 4	Cytoplasm	other	4.9534e-05	9.97018e-07	up	2.89909	2.89909	1.5356	165
Cell Death and Survival	necrosis	4.1e-19		0.438	RHOB	ras homolog family member B	Cytoplasm	enzyme	6.81397e-05	2.79312e-06	down	3.93244	-3.93244	-1.97543	165
Cell Death and Survival	necrosis	4.1e-19		0.438	RPS6KA5	ribosomal protein S6 kinase A5	Nucleus	kinase	0.000896053	0.000519236	up	2.57033	2.57033	1.36195	165
Cell Death and Survival	necrosis	4.1e-19		0.438	RPSA	ribosomal protein SA	Cytoplasm	translation regulator	4.9534e-05	1.00921e-06	up	4.16121	4.16121	2.057	165
Cell Death and Survival	necrosis	4.1e-19		0.438	S1PR1	sphingosine-1-phosphate receptor 1	Plasma Membrane	G-protein coupled receptor	1.48349e-06	3.38774e-10	down	7.79723	-7.79723	-2.96296	165
Cell Death and Survival	necrosis	4.1e-19		0.438	SAA1	serum amyloid A1	Extracellular Space	transporter	7.47863e-05	4.10752e-06	up	2.96712	2.96712	1.56907	165
Cell Death and Survival	necrosis	4.1e-19		0.438	SCG5	secretogranin V	Extracellular Space	other	4.9534e-05	1.00408e-06	up	4.95408	4.95408	2.30862	165
Cell Death and Survival	necrosis	4.1e-19		0.438	SEMA3A	semaphorin 3A	Extracellular Space	other	0.000519394	0.000207155	up	2.7446	2.7446	1.4566	165
Cell Death and Survival	necrosis	4.1e-19		0.438	SEMA6A	semaphorin 6A	Plasma Membrane	transmembrane receptor	0.000689694	0.000340277	down	2.06704	-2.06704	-1.04756	165
Cell Death and Survival	necrosis	4.1e-19		0.438	SEMA7A	semaphorin 7A (John Milton Hagen blood group)	Plasma Membrane	transmembrane receptor	7.21903e-05	3.52387e-06	up	3.20441	3.20441	1.68006	165
Cell Death and Survival	necrosis	4.1e-19		0.438	SERP1	stress-associated endoplasmic reticulum protein 1	Cytoplasm	other	7.47863e-05	4.12444e-06	up	3.26233	3.26233	1.7059	165
Cell Death and Survival	necrosis	4.1e-19		0.438	SERPINB2	serpin family B member 2	Extracellular Space	other	0.00148016	0.00107657	up	4.30458	4.30458	2.10587	165
Cell Death and Survival	necrosis	4.1e-19		0.438	SFRP4	secreted frizzled related protein 4	Plasma Membrane	transmembrane receptor	0.00117179	0.000782337	down	2.0725	-2.0725	-1.05137	165
Cell Death and Survival	necrosis	4.1e-19		0.438	SLC1A3	solute carrier family 1 member 3	Plasma Membrane	transporter	0.000666537	0.000319893	up	2.92206	2.92206	1.54699	165
Cell Death and Survival	necrosis	4.1e-19		0.438	SLC6A6	solute carrier family 6 member 6	Plasma Membrane	transporter	0.000127232	1.43531e-05	down	2.39218	-2.39218	-1.25833	165
Cell Death and Survival	necrosis	4.1e-19		0.438	SLC7A11	solute carrier family 7 member 11	Plasma Membrane	transporter	7.00793e-05	3.12327e-06	up	2.30715	2.30715	1.20611	165
Cell Death and Survival	necrosis	4.1e-19		0.438	SNAP25	synaptosome associated protein 25kDa	Plasma Membrane	transporter	0.000114304	1.12265e-05	down	2.84358	-2.84358	-1.50771	165
Cell Death and Survival	necrosis	4.1e-19		0.438	SOAT1	sterol O-acyltransferase 1	Cytoplasm	enzyme	0.00010086	8.59989e-06	down	2.14992	-2.14992	-1.10428	165
Cell Death and Survival	necrosis	4.1e-19		0.438	SOD2	superoxide dismutase 2, mitochondrial	Cytoplasm	enzyme	5.71384e-05	1.58904e-06	up	2.2088	2.2088	1.14326	165
Cell Death and Survival	necrosis	4.1e-19		0.438	SPRY2	sprouty RTK signaling antagonist 2	Plasma Membrane	other	0.000410306	0.000136093	up	2.82721	2.82721	1.49938	165
Cell Death and Survival	necrosis	4.1e-19		0.438	SRI	sorcin	Cytoplasm	transporter	5.67199e-05	1.5399e-06	down	3.03755	-3.03755	-1.60291	165
Cell Death and Survival	necrosis	4.1e-19		0.438	STAT1	signal transducer and activator of transcription 1	Nucleus	transcription regulator	0.000127302	1.44319e-05	down	2.48387	-2.48387	-1.31259	165
Cell Death and Survival	necrosis	4.1e-19		0.438	STC1	stanniocalcin 1	Extracellular Space	kinase	0.000278723	6.72781e-05	up	2.19527	2.19527	1.1344	165
Cell Death and Survival	necrosis	4.1e-19		0.438	STK17B	serine/threonine kinase 17b	Nucleus	kinase	7.88016e-05	4.85087e-06	up	2.06719	2.06719	1.04767	165
Cell Death and Survival	necrosis	4.1e-19		0.438	SWAP70	SWAP switching B-cell complex 70kDa subunit	Cytoplasm	other	5.71384e-05	1.62624e-06	down	2.19703	-2.19703	-1.13556	165
Cell Death and Survival	necrosis	4.1e-19		0.438	TERF1	telomeric repeat binding factor 1	Nucleus	other	8.51936e-05	5.98124e-06	down	2.0612	-2.0612	-1.04349	165
Cell Death and Survival	necrosis	4.1e-19		0.438	THBD	thrombomodulin	Plasma Membrane	transmembrane receptor	8.17504e-05	5.46994e-06	up	3.21574	3.21574	1.68515	165
Cell Death and Survival	necrosis	4.1e-19		0.438	THRB	thyroid hormone receptor beta	Nucleus	ligand-dependent nuclear receptor	0.000438312	0.000152593	down	3.65533	-3.65533	-1.87	165
Cell Death and Survival	necrosis	4.1e-19		0.438	TLR2	toll like receptor 2	Plasma Membrane	transmembrane receptor	8.09449e-05	5.23963e-06	up	4.16405	4.16405	2.05799	165
Cell Death and Survival	necrosis	4.1e-19		0.438	TMEM158	transmembrane protein 158 (gene/pseudogene)	Plasma Membrane	other	5.23957e-05	1.25439e-06	up	2.73725	2.73725	1.45273	165
Cell Death and Survival	necrosis	4.1e-19		0.438	TNF	tumor necrosis factor	Extracellular Space	cytokine	0.000291147	7.31026e-05	up	2.74571	2.74571	1.45718	165
Cell Death and Survival	necrosis	4.1e-19		0.438	TNFAIP3	TNF alpha induced protein 3	Nucleus	enzyme	4.63841e-05	6.73483e-07	up	3.2656	3.2656	1.70735	165
Cell Death and Survival	necrosis	4.1e-19		0.438	TNFRSF19	tumor necrosis factor receptor superfamily member 19	Plasma Membrane	transmembrane receptor	7.83021e-05	4.53929e-06	down	3.32882	-3.32882	-1.73501	165
Cell Death and Survival	necrosis	4.1e-19		0.438	TPD52	tumor protein D52	Cytoplasm	other	3.65159e-05	2.46409e-07	down	2.27479	-2.27479	-1.18573	165
Cell Death and Survival	necrosis	4.1e-19		0.438	TRAF1	TNF receptor associated factor 1	Cytoplasm	other	7.2424e-05	3.63029e-06	up	5.55985	5.55985	2.47505	165
Cell Death and Survival	necrosis	4.1e-19		0.438	UCP2	uncoupling protein 2	Cytoplasm	transporter	0.000212663	3.87543e-05	down	2.04574	-2.04574	-1.03262	165
Cell Death and Survival	necrosis	4.1e-19		0.438	UNG	uracil DNA glycosylase	Nucleus	enzyme	0.000545803	0.000225773	down	2.10693	-2.10693	-1.07514	165
Cell Death and Survival	necrosis	4.1e-19		0.438	VAV3	vav guanine nucleotide exchange factor 3	Extracellular Space	cytokine	9.63321e-05	7.8327e-06	down	8.02289	-8.02289	-3.00412	165
Cell Death and Survival	necrosis	4.1e-19		0.438	VDR	vitamin D (1,25- dihydroxyvitamin D3) receptor	Nucleus	transcription regulator	0.000664155	0.000317745	up	3.17167	3.17167	1.66524	165
Cell Death and Survival	necrosis	4.1e-19		0.438	VEGFC	vascular endothelial growth factor C	Extracellular Space	growth factor	4.25833e-05	4.70028e-07	up	2.6596	2.6596	1.41121	165
Cell Death and Survival	necrosis	4.1e-19		0.438	WNT5A	Wnt family member 5A	Extracellular Space	cytokine	9.09658e-05	6.84293e-06	up	3.07702	3.07702	1.62154	165
Cell Death and Survival	necrosis	4.1e-19		0.438	WSB1	WD repeat and SOCS box containing 1	Other	other	0.000514457	0.000202834	down	2.31514	-2.31514	-1.2111	165
Cell Death and Survival	necrosis	4.1e-19		0.438	XDH	xanthine dehydrogenase	Cytoplasm	enzyme	0.000240351	4.90388e-05	up	2.04405	2.04405	1.03143	165
Cell Death and Survival	necrosis	4.1e-19		0.438	XPR1	xenotropic and polytropic retrovirus receptor 1	Plasma Membrane	G-protein coupled receptor	0.000234311	4.64716e-05	down	3.06335	-3.06335	-1.61511	165
Tissue Development	development of epithelial tissue	4.34e-19	Increased	2.814	AIMP1	aminoacyl tRNA synthetase complex-interacting multifunctional protein 1	Extracellular Space	cytokine	0.00061013	0.000272183	down	2.17524	-2.17524	-1.12117	59
Tissue Development	development of epithelial tissue	4.34e-19	Increased	2.814	ANTXR2	anthrax toxin receptor 2	Plasma Membrane	transmembrane receptor	5.23957e-05	1.20403e-06	up	5.25029	5.25029	2.3924	59
Tissue Development	development of epithelial tissue	4.34e-19	Increased	2.814	ARHGAP22	Rho GTPase activating protein 22	Cytoplasm	other	4.21995e-05	4.57747e-07	up	2.59293	2.59293	1.37458	59
Tissue Development	development of epithelial tissue	4.34e-19	Increased	2.814	BMPER	BMP binding endothelial regulator	Extracellular Space	other	0.000275311	6.53595e-05	up	4.43084	4.43084	2.14758	59
Tissue Development	development of epithelial tissue	4.34e-19	Increased	2.814	C3	complement component 3	Extracellular Space	peptidase	0.000166276	2.38974e-05	up	3.15758	3.15758	1.65882	59
Tissue Development	development of epithelial tissue	4.34e-19	Increased	2.814	CA2	carbonic anhydrase 2	Cytoplasm	enzyme	8.02025e-05	5.01838e-06	down	2.0211	-2.0211	-1.01514	59
Tissue Development	development of epithelial tissue	4.34e-19	Increased	2.814	CAV2	caveolin 2	Plasma Membrane	other	0.000299487	7.77613e-05	down	2.2358	-2.2358	-1.16079	59
[truncated: 19,552 more rows]
