# Supplementary material for: SKA1 promotes tumor metastasis via SAFB-mediated transcription repression of DUSP6 in clear cell renal cell carcinoma
Source: Aging (Albany NY). 2022 Dec 2;14(23):9679–98. doi: 10.18632/aging.204418 (PMC9792197; doi:10.18632/aging.204418)
Supplement: Supplementary Table 3D [file aging-14-204418-s007.xlsx]

## Sheet: Networks
ID	Molecules in Network	Score	Focus Molecules	Top Diseases and Functions	Counts of AntibodyList
1	AKR1B10,Aldose Reductase,ARG2,arginase,ATP8A1,CDKN1C,Cg,cyclooxygenase,DUSP6,ECE1,FILIP1L,FSH,Gamma tubulin,GEM,GJB2,KCNK3,Lh,Nos,NR2F6,PAPPA,PEPCK,PHLDA1,Pkc(s),PTGS1,PTPase,PTPRN2,PTPRR,SFRP4,Sod,STC1,STC2,STEAP1,TMEM158,UCP2,UNG	33	23	Cancer, Gastrointestinal Disease, Organismal Injury and Abnormalities	2
2	Alpha catenin,Ap1,AREG,CD3,CDA,CHPT1,COPB2,COQ5,CTSW,DNAJB6,EPHB1,ETS1,Focal adhesion kinase,Histone h3,Histone h4,HSD17B4,Hsp90,Importin alpha,MAP3K1,MAP4K4,Metalloprotease,Mmp,MMP7,MMP9,p85 (pik3r),PLAU,PPIA,PROCR,PTCH1,PTGER2,PTPN13,SRGN,SUSD6,TCR,UBE2W	33	23	Cardiovascular Disease, Cellular Movement, Cancer	3
3	2' 5' oas,ADCY7,ARHGAP22,ARID3B,ARL5B,ARRDC3,C1QTNF1,CCDC15,CD80/CD86,Cebp,CERS6,coagulation factor,Collagen type VII,Gpd,GPD2,GUCY,HLA-DQ,IL17a dimer,IL4I1,KMO,LAMB3,LAMC2,MFSD2A,MLKL,MTHFD2L,OAS1,Par,peptidase,peroxidase,Serine Protease,SERPINB8,SERPIND1,TNF,VEZF1,ZNF365	31	22	Connective Tissue Disorders, Dermatological Diseases and Conditions, Developmental Disorder	0
4	ALOX5AP,ARHGAP26,ARHGDIB,Cbp/p300,CCNG1,chemokine receptor,Cpla2,CXCL5,ELL2,ETV5,HIPK2,HNRNPA3,Holo RNA polymerase II,KITLG,LAPTM5,Mapk,Mek,Pias,PLA2G4A,Ppp2c,Rho gdi,RPS6KA5,SEMA5B,SIRPB1,SLC44A2,Smad1/5/8,Sos,SP100,sphingomyelinase,SPRY2,Srebp,TAF13,TAF9B,TPD52,WSB1	31	22	Cell Cycle, Lipid Metabolism, Small Molecule Biochemistry	3
5	26s Proteasome,Actin,Alp,Alpha tubulin,AMACR,ATP6V0D2,CCDC183,Ck2,Creb,CTDSPL2,DENND6A,DNMBP,DPY30,FHDC1,GALNT3,GBAS,GPHN,GTPase,Hsp70,ID1,Insulin,MCU,MTORC1,NDEL1,NEFL,NUCKS1,PDE4DIP,Pka catalytic subunit,Proinsulin,RNA polymerase II,SCG5,SEP15,SNAP25,SSR1,WIPI1	31	22	Cellular Assembly and Organization, Cellular Function and Maintenance, Nervous System Development and Function	2
6	Akt,ARTN,C-C chemokine receptor,c-Src,CAV2,Caveolin,CD82,DHRS3,DUT,Ecm,ENAH,Filamin,FKHR,GDF15,Integrin,Integrin alpha 3 beta 1,Integrin alpha 4 beta 1,Integrinβ,JINK1/2,LCP1,Lfa-1,LPXN,LRIG1,MYO10,NDFIP1,PLAC8,PLAUR,Ptk,RDH10,RHOB,SEMA6D,SEMA7A,SIGLEC15,SWAP70,TGFBR	27	20	Cellular Movement, Cell-To-Cell Signaling and Interaction, Hematological System Development and Function	0
7	C1D,Cadherin,CDH6,COL13A1,DNAJB9,EGR1,estrogen receptor,Growth hormone,GUCY1B3,histone deacetylase,IFI44L,IGFBP3,INTERLEUKIN,ME1,MMP1,N-cor,NT5E,OAS3,PKDCC,Rar,ROBO4,Rxr,secreted MMP,SERP1,SLC19A2,TBL1X,THRB,thymidine kinase,thyroid hormone receptor,Timp,trypsin,USP36,VDR,Vegf,VitaminD3-VDR-RXR	26	20	Organ Morphology, Dermatological Diseases and Conditions, Endocrine System Development and Function	4
8	ADD3,ASB9,ATPase,C3,CCL20,CD40,CFI,chemokine,Cr3,creatine kinase,CXCL1,CXCL3,CXCL8,CXCL11,CYB5R4,DOCK4,elastase,F3,Fibrinogen,HMOX1,ICAM1,Il8r,LDL,MMP14,NADPH oxidase,P2RY2,Pdgf (complex),PDGF BB,PI3K (family),Pld,Rock,SLC6A6,TMEM11,tyrosine kinase,XDH	26	20	Cell-To-Cell Signaling and Interaction, Cellular Movement, Hematological System Development and Function	3
9	ANLN,APOL3,Caspase 3/7,CDKN1A,CNOT6,CSF2,Cyclin B,CYP,ELF3,Gsk3,IFI44,IFN Beta,IgG1,Igg3,Igm,IL12 (family),ILF3,Immunoglobulin,INHBA,Interferon alpha,MHC CLASS I (family),NAV3,PHB2,REC8,RPSA,SGK2,SKA1,SLFN5,Smad,STAT,STAT1,STAT5a/b,TAP1,Tgf beta,TWF1	25	19	Cancer, Endocrine System Disorders, Organismal Injury and Abnormalities	3
10	ACBD5,ADAMTS18,ATP6AP1,ATP6V1B1,DAPP1,FAM13A,FGFBP1,HMGA2,HMGB3,ICAM3,ITGB6,KCNK1,KLHL7,KYNU,MAPK7,MAZ,MYO1E,NXF1,PAQR3,PLCL2,PNISR,PNP,PODXL,PTBP1,RAF1,RAVER2,SARAF,SLC35F6,SPRED1,SRPK2,TM4SF19,TMEM192,ZAK,ZBED6CL,ZNF680	24	18	Cell-To-Cell Signaling and Interaction, Cell Morphology, Cellular Function and Maintenance	2
11	AIMP1,Alpha Actinin,ANTXR2,Collagen type II,Collagen type III,Collagen type IV,Collagen(s),ERK1/2,Fibrin,GAL3ST1,gelatinase,HERPUD1,IMPA2,ITGB6,KLRC1,Laminin,MIR17HG,N-type Calcium Channel,Pdgf Ab,PDGF-AA,Pkg,PLAT,Plc beta,PLCB4,PRDM8,Rab5,Rab11,RAB11FIP1,RGS3,RGS4,SEMA6A,SERPINB7,SMAD1/5,THBD,TPCN1	22	18	Cardiac Necrosis/Cell Death, Cardiovascular Disease, Cell Death and Survival	1
12	ADRB,ALDH,ALDH1A1,ARID4A,C8,calpain,Casein,CCL2,Cdk,CHST1,CXCL2,Cyclin A,Cyclin D,Cyclin E,DNA-methyltransferase,E2f,EID1,FAM127C,FBXO21,Hdac,HISTONE,HOXA13,JARID2,KLF4,MTPN,PP1 protein complex group,PP1-C,PPIF,PPP1R9A,Rb,RCOR1,SLC7A11,SLCO4A1,Wnt,WNT5A	22	18	Digestive System Development and Function, Embryonic Development, Organismal Development	4
13	ADGRE5,COL15A1,COX15,CTDSPL,DUSP3,ELAVL1,ERLIN2,FAM46C,FKBP14,FLVCR1,FZD6,GLYR1,GPR107,GPR180,GPR89A/GPR89B,LIN7C,MOSPD2,PAPLN,PCMTD1,PM20D2,PRPS2,PXDC1,SFXN1,SFXN4,SLC30A5,SLC39A14,SLCO4C1,TFAP2C,TMEM2,TMEM17,TMEM65,TMTC4,VEZT,ZNF362,ZNF395	22	17	Molecular Transport, Cellular Function and Maintenance, Small Molecule Biochemistry	0
14	ABCC5,ABHD2,ACTN3,BRCA1,BRINP1,CDCA2,COPE,COTL1,DAGLB,DNTTIP1,DUT,ELFN2,ESR1,FAT4,FRMD4B,GOLGA8DP,HIST1H2AE,HMGA2,KCNK6,LRIF1,MAP3K7CL,MARCH4,NUDT14,OTUB2,PISD,PPP1CA,PPP2R5C,RAPGEF6,REL,SAMD11,SHMT2,SLC39A13,TNFRSF10A,ZBTB8OS,ZNF544	22	17	Organ Morphology, Cancer, Endocrine System Disorders	1
15	ACKR1,ACTR3C,ADORA2B,ANXA8/ANXA8L1,BBOF1,BDKRB1,C21orf91,CCDC85B,CCRL2,CELSR2,CXCR6,FGF6,GDPD5,GPR146,GPRC5A,GPRC5B,HIC1,HTR2B,KRAS,mir-21,MTRR,MZT1,OBFC1,P2RY1,P2RY6,PER3,PTGR2,S1PR1,S1PR2,S1PR3,S1PR4,SLC52A2,TERF1,TGFB1,ZNF165	20	16	Cellular Development, Tissue Morphology, Cellular Growth and Proliferation	1
16	ADSS,ADTRP,AFF3,BRIP1,C12orf49,CCL16,CHST9,DEPDC1,dihydrotestosterone,ELSPBP1,FAM160A2,FAM86C1,FOXO1,G0S2,GPR20,HNF4A,HOOK3,HPD,LSM5,ME1,MXI1,NCF1C,NFYA,PEX13,PRPF38B,SBNO2,SFSWAP,SLC1A4,SLC25A40,TAL1,TMEM156,TOX,TRIM55,ZC3H10,ZNRD1	19	16	Cell Cycle, Cellular Assembly and Organization, Hereditary Disorder	1
17	ABCB7,ABCB10,AGO4,APP,CPOX,DGUOK,ENTPD7,FBXO2,FECH,FZD4,GGA2,GGA3,GLRX5,GSAP,JTB,NDP,NECAP1,NECAP2,NIM1K,NTM,OLFML2A,PPOX,PSENEN,RGS14,RUFY3,SLAMF8,SLC17A5,SUCLA2,SUCLG1,TCP11L1,TOMM5,TSPAN12,UBE2S,VWA5A,ZXDC	19	16	Hereditary Disorder, Ophthalmic Disease, Organismal Injury and Abnormalities	2
18	ACKR3,AKT1,B3GNT7,Beta Arrestin,BMF,BMP7,CGNL1,CTHRC1,CTNNB1,DYNLL1,ELMOD2,EMP1,EPSTI1,FGF20,FOXP1,FZD8,GDF3,GLCCI1,GLIPR1,GPRIN3,KISS1R,LACC1,LTB4R2,MT1L,MTA1,NHSL1,NR3C1,PALM2,PHLDB2,POU5F1,PPP2CA,QSER1,TNFRSF19,TRAC,WNT16	18	16	Cardiovascular Disease, Organismal Injury and Abnormalities, Embryonic Development	5
19	1-acylglycerol-3-phosphate O-acyltransferase,14-3-3,ABHD5,AMPK,caspase,CNKSR3,Cofilin,CRLS1,cytochrome C,cytochrome-c oxidase,FAM43A,FBXO32,HAS2,Hsp27,ITIH5,KCNJ16,LCLAT1,Ldh (complex),MAP2K1/2,Mitochondrial complex 1,Mlc,Na+,K+ -ATPase,p70 S6k,PARP,PDZK1,Pka,PP2A,PPP2R1B,PRDX3,PRKAA,PRKAA1,SETBP1,SOD2,SRI,STK17B	18	17	Embryonic Development, Organ Development, Organismal Development	2
20	ADAMTS9,ARHGAP28,BMPER,Ciap,CYLD,DAP,DDX58,ETS,Fascin,Ferritin,G0S2,I kappa b kinase,IFIH1,Ikk (family),IL-1R,IRAK,IRF,LY96,Lymphotoxin,MAP3K,MAVS,NFkB (complex),NFkB (family),NfkB-RelA,NfkB1-RelA,NIK,OTUB2,P-TEFb,SCLY,SLC2A12,Stat3-Stat3,TNFRSF19,TRAF,tryptase,VIMP	17	15	Infectious Diseases, Cell-To-Cell Signaling and Interaction, Hair and Skin Development and Function	4
21	Aconitase,APC/APC2,BCL2A1,CNEP1R1,collagen,CSF,HLA-DR,HMGA2,HSP,HSPA9,Ifn gamma,Ikb,IKK (complex),IL1,IRAK2,LITAF,NFKBIE,NLRP3,NREP,P glycoprotein,P38 MAPK,PELI1,Pro-inflammatory Cytokine,Smad2/3,Smad2/3-Smad4,TAB2,Tlr,TLR2,Tnf (family),Tnf receptor,TNFAIP3,TRAF1,UBE2N,Ubiquitin,ZNF697	17	16	Cell Signaling, Inflammatory Response, Organismal Survival	3
22	Angiotensin II receptor type 1,CA2,Ctbp,ELK3,ERK,Fcgr3,Fgf,FGF1,FGF5,Fgfr,FGFR2,GSE1,Hspg,JUN/JUNB/JUND,MAFF,Mapk kinase,N-Cadherin,NCK,Neuropilin,NRP2,Oas,PCSK5,PLC gamma,Rsk,Sema3,SEMA3A,SEMA3C,SERCA,SERPINB2,SYK/ZAP,TCF,TLR2/TLR4,VAV,VAV3,VEGFC	16	14	Cardiovascular System Development and Function, Organismal Development, Cellular Development	3
23	AK4,C1orf106,C6orf1,COPS5,DOCK4,DUOX1,EGFR,EGFR ligand,FAM98A,FASLG,G3BP2,glycochenodeoxycholate,HAVCR1,KLHL21,LAD1,LRCH2,MGARP,MIR22HG,MPP4,MT1L,PHLDA1,Pik3r,PLK2,PLPP1,PROCR,RPS21,SFN,SGPP2,SH2D3A,singlet oxygen,sphingosine-1-phosphate,sphingosine-1-phosphate phosphatase,TNS4,TP73,WT1	16	14	Cell Death and Survival, Cancer, Gastrointestinal Disease	2
24	7S NGF,Alpha 1 antitrypsin,ALT,C/ebp,C1q,CLEC4E,COL17A1,CTSS,EGLN3,Fc gamma receptor,Fcgr2,GBP3,GOT,GSTA4,HDL,hemoglobin,IgG,IgG2a,IL6,IL23,Inflammasome (Nalp3, Asc, Casp1),LTB,MHC Class II (complex),MHC II,MIR124,MIRLET7,Nr1h,Pgk,PTGIS,PTX3,SAA,SAA1,SAA2,SEC24A,Sphk	15	13	Increased Levels of ALT, Cellular Movement, Hematological System Development and Function	1
25	ACSM3,beta-estradiol,BOK,CORO2B,CSGALNACT2,CUL3,CXorf56,DDIT3,EMP1,FAM167A,FGF6,FGFBP1,GNRH2,GSTP1,Gstt3,HRAS,IL17RD,IL20RA,KRTAP2-3/KRTAP2-4,LMNA,LRRC8B,MAPK1,MIR320,MMD,MUC5B,p38 Sapk,Relaxin,RHOBTB1,RLN2,SLC52A1,TMEM37,TMEM64,TSC22D1,VEPH1,ZSCAN31	15	13	Connective Tissue Development and Function, Skeletal and Muscular System Development and Function, Tissue Morphology	2

## Sheet: Detail
Supplementary Table 3D. The top 3 associated networks covered cancer, gastrointestinal disease and organismal injury and abnormalities.
ID	Molecules in Network	Entrez Gene Name	Location	Type(s)	Corrected_p-value	P value	Regulation	FCAbsolute	Fold_Change	Log_FC	Score	Focus Molecules	Top Diseases and Functions
1	AKR1B10	aldo-keto reductase family 1, member B10 (aldose reductase)	Cytoplasm	enzyme	0.000245566	5.14517e-05	down	2.36178	-2.36178	-1.23988	33	23	Cancer, Gastrointestinal Disease, Organismal Injury and Abnormalities
1	Aldose Reductase										33	23	Cancer, Gastrointestinal Disease, Organismal Injury and Abnormalities
1	ARG2	arginase 2	Cytoplasm	enzyme	0.000291983	7.3746e-05	up	2.06061	2.06061	1.04307	33	23	Cancer, Gastrointestinal Disease, Organismal Injury and Abnormalities
1	arginase										33	23	Cancer, Gastrointestinal Disease, Organismal Injury and Abnormalities
1	ATP8A1	ATPase phospholipid transporting 8A1	Cytoplasm	transporter	0.0014257	0.00102394	down	4.30788	-4.30788	-2.10698	33	23	Cancer, Gastrointestinal Disease, Organismal Injury and Abnormalities
1	CDKN1C	cyclin-dependent kinase inhibitor 1C	Nucleus	other	9.05642e-05	6.78352e-06	down	2.73683	-2.73683	-1.45251	33	23	Cancer, Gastrointestinal Disease, Organismal Injury and Abnormalities
1	Cg										33	23	Cancer, Gastrointestinal Disease, Organismal Injury and Abnormalities
1	cyclooxygenase										33	23	Cancer, Gastrointestinal Disease, Organismal Injury and Abnormalities
1	DUSP6	dual specificity phosphatase 6	Cytoplasm	phosphatase	4.05507e-05	3.60207e-07	up	4.36083	4.36083	2.1246	33	23	Cancer, Gastrointestinal Disease, Organismal Injury and Abnormalities
1	ECE1	endothelin converting enzyme 1	Plasma Membrane	peptidase	0.000147862	1.93143e-05	up	2.01302	2.01302	1.00936	33	23	Cancer, Gastrointestinal Disease, Organismal Injury and Abnormalities
1	FILIP1L	filamin A interacting protein 1-like	Nucleus	other	0.000132141	1.55105e-05	down	2.28505	-2.28505	-1.19223	33	23	Cancer, Gastrointestinal Disease, Organismal Injury and Abnormalities
1	FSH										33	23	Cancer, Gastrointestinal Disease, Organismal Injury and Abnormalities
1	Gamma tubulin										33	23	Cancer, Gastrointestinal Disease, Organismal Injury and Abnormalities
1	GEM	GTP binding protein overexpressed in skeletal muscle	Plasma Membrane	enzyme	0.000122297	1.31545e-05	up	2.14791	2.14791	1.10294	33	23	Cancer, Gastrointestinal Disease, Organismal Injury and Abnormalities
1	GJB2	gap junction protein beta 2	Plasma Membrane	transporter	4.21674e-05	4.2607e-07	up	2.38678	2.38678	1.25507	33	23	Cancer, Gastrointestinal Disease, Organismal Injury and Abnormalities
1	KCNK3	potassium two pore domain channel subfamily K member 3	Plasma Membrane	ion channel	0.00040766	0.000134693	up	2.22179	2.22179	1.15172	33	23	Cancer, Gastrointestinal Disease, Organismal Injury and Abnormalities
1	Lh										33	23	Cancer, Gastrointestinal Disease, Organismal Injury and Abnormalities
1	Nos										33	23	Cancer, Gastrointestinal Disease, Organismal Injury and Abnormalities
1	NR2F6	nuclear receptor subfamily 2 group F member 6	Nucleus	ligand-dependent nuclear receptor	6.05334e-05	2.06189e-06	down	2.2978	-2.2978	-1.20026	33	23	Cancer, Gastrointestinal Disease, Organismal Injury and Abnormalities
1	PAPPA	pappalysin 1	Extracellular Space	peptidase	0.000596275	0.000262189	up	2.6645	2.6645	1.41387	33	23	Cancer, Gastrointestinal Disease, Organismal Injury and Abnormalities
1	PEPCK										33	23	Cancer, Gastrointestinal Disease, Organismal Injury and Abnormalities
1	PHLDA1	pleckstrin homology like domain family A member 1	Cytoplasm	other	4.21674e-05	4.04011e-07	up	2.56874	2.56874	1.36106	33	23	Cancer, Gastrointestinal Disease, Organismal Injury and Abnormalities
1	Pkc(s)										33	23	Cancer, Gastrointestinal Disease, Organismal Injury and Abnormalities
1	PTGS1	prostaglandin-endoperoxide synthase 1	Cytoplasm	enzyme	0.000467757	0.000172084	up	2.1589	2.1589	1.1103	33	23	Cancer, Gastrointestinal Disease, Organismal Injury and Abnormalities
1	PTPase										33	23	Cancer, Gastrointestinal Disease, Organismal Injury and Abnormalities
1	PTPRN2	protein tyrosine phosphatase, receptor type N2	Plasma Membrane	phosphatase	6.18657e-05	2.29182e-06	up	4.20327	4.20327	2.07151	33	23	Cancer, Gastrointestinal Disease, Organismal Injury and Abnormalities
1	PTPRR	protein tyrosine phosphatase, receptor type R	Plasma Membrane	phosphatase	0.000304557	7.97384e-05	up	2.32023	2.32023	1.21427	33	23	Cancer, Gastrointestinal Disease, Organismal Injury and Abnormalities
1	SFRP4	secreted frizzled related protein 4	Plasma Membrane	transmembrane receptor	0.00117179	0.000782337	down	2.0725	-2.0725	-1.05137	33	23	Cancer, Gastrointestinal Disease, Organismal Injury and Abnormalities
1	Sod										33	23	Cancer, Gastrointestinal Disease, Organismal Injury and Abnormalities
1	STC1	stanniocalcin 1	Extracellular Space	kinase	0.000278723	6.72781e-05	up	2.19527	2.19527	1.1344	33	23	Cancer, Gastrointestinal Disease, Organismal Injury and Abnormalities
1	STC2	stanniocalcin 2	Extracellular Space	other	6.68109e-05	2.70814e-06	up	2.3721	2.3721	1.24616	33	23	Cancer, Gastrointestinal Disease, Organismal Injury and Abnormalities
1	STEAP1	six transmembrane epithelial antigen of the prostate 1	Plasma Membrane	transporter	0.000299619	7.78297e-05	up	2.28441	2.28441	1.19182	33	23	Cancer, Gastrointestinal Disease, Organismal Injury and Abnormalities
1	TMEM158	transmembrane protein 158 (gene/pseudogene)	Plasma Membrane	other	5.23957e-05	1.25439e-06	up	2.73725	2.73725	1.45273	33	23	Cancer, Gastrointestinal Disease, Organismal Injury and Abnormalities
1	UCP2	uncoupling protein 2	Cytoplasm	transporter	0.000212663	3.87543e-05	down	2.04574	-2.04574	-1.03262	33	23	Cancer, Gastrointestinal Disease, Organismal Injury and Abnormalities
1	UNG	uracil DNA glycosylase	Nucleus	enzyme	0.000545803	0.000225773	down	2.10693	-2.10693	-1.07514	33	23	Cancer, Gastrointestinal Disease, Organismal Injury and Abnormalities
2	Alpha catenin										33	23	Cardiovascular Disease, Cellular Movement, Cancer
2	Ap1										33	23	Cardiovascular Disease, Cellular Movement, Cancer
2	AREG	amphiregulin	Extracellular Space	growth factor	0.00030687	8.06945e-05	up	2.63063	2.63063	1.39541	33	23	Cardiovascular Disease, Cellular Movement, Cancer
2	CD3										33	23	Cardiovascular Disease, Cellular Movement, Cancer
2	CDA	cytidine deaminase	Nucleus	enzyme	0.000722094	0.000367313	up	2.01104	2.01104	1.00794	33	23	Cardiovascular Disease, Cellular Movement, Cancer
2	CHPT1	choline phosphotransferase 1	Cytoplasm	enzyme	0.000497943	0.000191546	down	2.1177	-2.1177	-1.0825	33	23	Cardiovascular Disease, Cellular Movement, Cancer
2	COPB2	coatomer protein complex subunit beta 2	Cytoplasm	transporter	9.63321e-05	7.85242e-06	down	2.97235	-2.97235	-1.5716	33	23	Cardiovascular Disease, Cellular Movement, Cancer
2	COQ5	coenzyme Q5, methyltransferase	Cytoplasm	enzyme	6.88576e-05	3.00179e-06	down	2.45121	-2.45121	-1.29349	33	23	Cardiovascular Disease, Cellular Movement, Cancer
2	CTSW	cathepsin W	Cytoplasm	peptidase	0.000406267	0.000133505	up	2.33386	2.33386	1.22272	33	23	Cardiovascular Disease, Cellular Movement, Cancer
2	DNAJB6	DnaJ heat shock protein family (Hsp40) member B6	Nucleus	transcription regulator	4.56082e-05	6.29335e-07	up	2.6549	2.6549	1.40866	33	23	Cardiovascular Disease, Cellular Movement, Cancer
2	EPHB1	EPH receptor B1	Plasma Membrane	kinase	0.0001348	1.60689e-05	up	2.30644	2.30644	1.20567	33	23	Cardiovascular Disease, Cellular Movement, Cancer
2	ETS1	ETS proto-oncogene 1, transcription factor	Nucleus	transcription regulator	0.000727446	0.000371116	up	2.14953	2.14953	1.10402	33	23	Cardiovascular Disease, Cellular Movement, Cancer
2	Focal adhesion kinase										33	23	Cardiovascular Disease, Cellular Movement, Cancer
2	Histone h3										33	23	Cardiovascular Disease, Cellular Movement, Cancer
2	Histone h4										33	23	Cardiovascular Disease, Cellular Movement, Cancer
2	HSD17B4	hydroxysteroid (17-beta) dehydrogenase 4	Cytoplasm	enzyme	3.99514e-05	3.42128e-07	down	2.01416	-2.01416	-1.01018	33	23	Cardiovascular Disease, Cellular Movement, Cancer
2	Hsp90										33	23	Cardiovascular Disease, Cellular Movement, Cancer
2	Importin alpha										33	23	Cardiovascular Disease, Cellular Movement, Cancer
2	MAP3K1	mitogen-activated protein kinase kinase kinase 1	Cytoplasm	kinase	0.000104164	9.08987e-06	down	2.99182	-2.99182	-1.58102	33	23	Cardiovascular Disease, Cellular Movement, Cancer
2	MAP4K4	mitogen-activated protein kinase kinase kinase kinase 4	Cytoplasm	kinase	0.000136555	1.64327e-05	up	2.15776	2.15776	1.10954	33	23	Cardiovascular Disease, Cellular Movement, Cancer
2	Metalloprotease										33	23	Cardiovascular Disease, Cellular Movement, Cancer
2	Mmp										33	23	Cardiovascular Disease, Cellular Movement, Cancer
2	MMP7	matrix metallopeptidase 7	Extracellular Space	peptidase	0.000324617	9.07357e-05	down	4.18581	-4.18581	-2.06551	33	23	Cardiovascular Disease, Cellular Movement, Cancer
2	MMP9	matrix metallopeptidase 9	Extracellular Space	peptidase	0.000105861	9.4402e-06	up	5.58648	5.58648	2.48194	33	23	Cardiovascular Disease, Cellular Movement, Cancer
2	p85 (pik3r)										33	23	Cardiovascular Disease, Cellular Movement, Cancer
2	PLAU	plasminogen activator, urokinase	Extracellular Space	peptidase	7.29755e-05	3.74487e-06	up	4.08751	4.08751	2.03122	33	23	Cardiovascular Disease, Cellular Movement, Cancer
2	PPIA	peptidylprolyl isomerase A	Cytoplasm	enzyme	0.000213482	3.91661e-05	down	3.11421	-3.11421	-1.63887	33	23	Cardiovascular Disease, Cellular Movement, Cancer
2	PROCR	protein C receptor	Plasma Membrane	other	4.80549e-05	8.55968e-07	down	2.18783	-2.18783	-1.1295	33	23	Cardiovascular Disease, Cellular Movement, Cancer
2	PTCH1	patched 1	Plasma Membrane	transmembrane receptor	0.000788746	0.000423282	down	2.08064	-2.08064	-1.05703	33	23	Cardiovascular Disease, Cellular Movement, Cancer
2	PTGER2	prostaglandin E receptor 2	Plasma Membrane	G-protein coupled receptor	0.000252601	5.47139e-05	down	2.17697	-2.17697	-1.12232	33	23	Cardiovascular Disease, Cellular Movement, Cancer
2	PTPN13	protein tyrosine phosphatase, non-receptor type 13	Cytoplasm	phosphatase	0.00056923	0.000241718	down	2.30453	-2.30453	-1.20447	33	23	Cardiovascular Disease, Cellular Movement, Cancer
2	SRGN	serglycin	Cytoplasm	other	0.000152117	2.0184e-05	up	2.12857	2.12857	1.08989	33	23	Cardiovascular Disease, Cellular Movement, Cancer
2	SUSD6	sushi domain containing 6	Other	other	5.71384e-05	1.61585e-06	up	2.39685	2.39685	1.26114	33	23	Cardiovascular Disease, Cellular Movement, Cancer
2	TCR										33	23	Cardiovascular Disease, Cellular Movement, Cancer
2	UBE2W	ubiquitin conjugating enzyme E2 W (putative)	Nucleus	enzyme	0.000241371	4.96137e-05	down	2.4976	-2.4976	-1.32054	33	23	Cardiovascular Disease, Cellular Movement, Cancer
3	2' 5' oas										31	22	Connective Tissue Disorders, Dermatological Diseases and Conditions, Developmental Disorder
3	ADCY7	adenylate cyclase 7	Plasma Membrane	enzyme	0.000171656	2.62247e-05	down	2.13945	-2.13945	-1.09724	31	22	Connective Tissue Disorders, Dermatological Diseases and Conditions, Developmental Disorder
3	ARHGAP22	Rho GTPase activating protein 22	Cytoplasm	other	4.21995e-05	4.57747e-07	up	2.59293	2.59293	1.37458	31	22	Connective Tissue Disorders, Dermatological Diseases and Conditions, Developmental Disorder
3	ARID3B	AT-rich interaction domain 3B	Nucleus	transcription regulator	6.27081e-05	2.39932e-06	up	2.2713	2.2713	1.18352	31	22	Connective Tissue Disorders, Dermatological Diseases and Conditions, Developmental Disorder
3	ARL5B	ADP ribosylation factor like GTPase 5B	Other	enzyme	0.000173975	2.69365e-05	up	2.25232	2.25232	1.17141	31	22	Connective Tissue Disorders, Dermatological Diseases and Conditions, Developmental Disorder
3	ARRDC3	arrestin domain containing 3	Plasma Membrane	other	0.000106882	9.78984e-06	down	2.06704	-2.06704	-1.04756	31	22	Connective Tissue Disorders, Dermatological Diseases and Conditions, Developmental Disorder
3	C1QTNF1	C1q and tumor necrosis factor related protein 1	Extracellular Space	other	0.000568222	0.000240942	up	2.0921	2.0921	1.06495	31	22	Connective Tissue Disorders, Dermatological Diseases and Conditions, Developmental Disorder
3	CCDC15	coiled-coil domain containing 15	Cytoplasm	other	0.000358423	0.000106487	up	2.38246	2.38246	1.25245	31	22	Connective Tissue Disorders, Dermatological Diseases and Conditions, Developmental Disorder
3	CD80/CD86										31	22	Connective Tissue Disorders, Dermatological Diseases and Conditions, Developmental Disorder
3	Cebp										31	22	Connective Tissue Disorders, Dermatological Diseases and Conditions, Developmental Disorder
3	CERS6	ceramide synthase 6	Nucleus	transcription regulator	0.000239634	4.85159e-05	down	2.09715	-2.09715	-1.06843	31	22	Connective Tissue Disorders, Dermatological Diseases and Conditions, Developmental Disorder
3	coagulation factor										31	22	Connective Tissue Disorders, Dermatological Diseases and Conditions, Developmental Disorder
3	Collagen type VII										31	22	Connective Tissue Disorders, Dermatological Diseases and Conditions, Developmental Disorder
3	Gpd										31	22	Connective Tissue Disorders, Dermatological Diseases and Conditions, Developmental Disorder
3	GPD2	glycerol-3-phosphate dehydrogenase 2	Cytoplasm	enzyme	5.90349e-05	1.79976e-06	down	2.02677	-2.02677	-1.01918	31	22	Connective Tissue Disorders, Dermatological Diseases and Conditions, Developmental Disorder
3	GUCY										31	22	Connective Tissue Disorders, Dermatological Diseases and Conditions, Developmental Disorder
3	HLA-DQ										31	22	Connective Tissue Disorders, Dermatological Diseases and Conditions, Developmental Disorder
3	IL17a dimer										31	22	Connective Tissue Disorders, Dermatological Diseases and Conditions, Developmental Disorder
3	IL4I1	interleukin 4 induced 1	Cytoplasm	enzyme	6.88576e-05	2.98039e-06	up	3.48522	3.48522	1.80125	31	22	Connective Tissue Disorders, Dermatological Diseases and Conditions, Developmental Disorder
3	KMO	kynurenine 3-monooxygenase (kynurenine 3-hydroxylase)	Cytoplasm	enzyme	0.000132	1.54366e-05	down	2.75964	-2.75964	-1.46448	31	22	Connective Tissue Disorders, Dermatological Diseases and Conditions, Developmental Disorder
3	LAMB3	laminin subunit beta 3	Extracellular Space	transporter	4.21995e-05	4.45304e-07	up	3.24474	3.24474	1.6981	31	22	Connective Tissue Disorders, Dermatological Diseases and Conditions, Developmental Disorder
3	LAMC2	laminin subunit gamma 2	Extracellular Space	other	4.99694e-05	1.06168e-06	up	2.58961	2.58961	1.37274	31	22	Connective Tissue Disorders, Dermatological Diseases and Conditions, Developmental Disorder
3	MFSD2A	major facilitator superfamily domain containing 2A	Plasma Membrane	transporter	7.83021e-05	4.55078e-06	up	2.05282	2.05282	1.03761	31	22	Connective Tissue Disorders, Dermatological Diseases and Conditions, Developmental Disorder
3	MLKL	mixed lineage kinase domain-like	Cytoplasm	kinase	8.59099e-05	6.10447e-06	up	2.02262	2.02262	1.01622	31	22	Connective Tissue Disorders, Dermatological Diseases and Conditions, Developmental Disorder
3	MTHFD2L	methylenetetrahydrofolate dehydrogenase (NADP+ dependent) 2-like	Cytoplasm	enzyme	0.00025278	5.48636e-05	up	2.88445	2.88445	1.5283	31	22	Connective Tissue Disorders, Dermatological Diseases and Conditions, Developmental Disorder
3	OAS1	2'-5'-oligoadenylate synthetase 1	Cytoplasm	enzyme	0.000831887	0.000462867	up	2.54895	2.54895	1.3499	31	22	Connective Tissue Disorders, Dermatological Diseases and Conditions, Developmental Disorder
3	Par										31	22	Connective Tissue Disorders, Dermatological Diseases and Conditions, Developmental Disorder
3	peptidase										31	22	Connective Tissue Disorders, Dermatological Diseases and Conditions, Developmental Disorder
3	peroxidase										31	22	Connective Tissue Disorders, Dermatological Diseases and Conditions, Developmental Disorder
3	Serine Protease										31	22	Connective Tissue Disorders, Dermatological Diseases and Conditions, Developmental Disorder
3	SERPINB8	serpin family B member 8	Cytoplasm	other	4.9534e-05	9.96752e-07	up	3.91082	3.91082	1.96747	31	22	Connective Tissue Disorders, Dermatological Diseases and Conditions, Developmental Disorder
3	SERPIND1	serpin family D member 1	Extracellular Space	other	0.000730228	0.000373821	up	2.96837	2.96837	1.56967	31	22	Connective Tissue Disorders, Dermatological Diseases and Conditions, Developmental Disorder
3	TNF	tumor necrosis factor	Extracellular Space	cytokine	0.000291147	7.31026e-05	up	2.74571	2.74571	1.45718	31	22	Connective Tissue Disorders, Dermatological Diseases and Conditions, Developmental Disorder
3	VEZF1	vascular endothelial zinc finger 1	Nucleus	transcription regulator	0.000350557	0.000102189	down	3.01663	-3.01663	-1.59294	31	22	Connective Tissue Disorders, Dermatological Diseases and Conditions, Developmental Disorder
3	ZNF365	zinc finger protein 365	Cytoplasm	other	0.000762044	0.000399903	down	2.02599	-2.02599	-1.01863	31	22	Connective Tissue Disorders, Dermatological Diseases and Conditions, Developmental Disorder
4	ALOX5AP	arachidonate 5-lipoxygenase activating protein	Plasma Membrane	other	0.000451005	0.00016139	up	2.27085	2.27085	1.18323	31	22	Cell Cycle, Lipid Metabolism, Small Molecule Biochemistry
4	ARHGAP26	Rho GTPase activating protein 26	Cytoplasm	other	0.000431776	0.000149348	up	2.01876	2.01876	1.01347	31	22	Cell Cycle, Lipid Metabolism, Small Molecule Biochemistry
4	ARHGDIB	Rho GDP dissociation inhibitor beta	Cytoplasm	enzyme	6.05334e-05	1.96135e-06	up	3.30009	3.30009	1.7225	31	22	Cell Cycle, Lipid Metabolism, Small Molecule Biochemistry
4	Cbp/p300										31	22	Cell Cycle, Lipid Metabolism, Small Molecule Biochemistry
4	CCNG1	cyclin G1	Nucleus	other	5.23957e-05	1.25288e-06	down	2.53544	-2.53544	-1.34224	31	22	Cell Cycle, Lipid Metabolism, Small Molecule Biochemistry
4	chemokine receptor										31	22	Cell Cycle, Lipid Metabolism, Small Molecule Biochemistry
4	Cpla2										31	22	Cell Cycle, Lipid Metabolism, Small Molecule Biochemistry
4	CXCL5	C-X-C motif chemokine ligand 5	Extracellular Space	cytokine	0.000517835	0.000205801	up	2.85352	2.85352	1.51274	31	22	Cell Cycle, Lipid Metabolism, Small Molecule Biochemistry
4	ELL2	elongation factor for RNA polymerase II 2	Nucleus	transcription regulator	0.000110537	1.05135e-05	up	2.5337	2.5337	1.34125	31	22	Cell Cycle, Lipid Metabolism, Small Molecule Biochemistry
4	ETV5	ETS variant 5	Nucleus	transcription regulator	0.000287693	7.17426e-05	up	2.60151	2.60151	1.37935	31	22	Cell Cycle, Lipid Metabolism, Small Molecule Biochemistry
4	HIPK2	homeodomain interacting protein kinase 2	Nucleus	kinase	4.76218e-05	8.20133e-07	down	3.90758	-3.90758	-1.96627	31	22	Cell Cycle, Lipid Metabolism, Small Molecule Biochemistry
4	HNRNPA3	heterogeneous nuclear ribonucleoprotein A3	Nucleus	other	3.99514e-05	3.34675e-07	down	3.2923	-3.2923	-1.7191	31	22	Cell Cycle, Lipid Metabolism, Small Molecule Biochemistry
4	Holo RNA polymerase II										31	22	Cell Cycle, Lipid Metabolism, Small Molecule Biochemistry
4	KITLG	KIT ligand	Extracellular Space	growth factor	3.70634e-05	2.92673e-07	down	2.80656	-2.80656	-1.4888	31	22	Cell Cycle, Lipid Metabolism, Small Molecule Biochemistry
4	LAPTM5	lysosomal protein transmembrane 5	Plasma Membrane	other	0.000266427	6.07086e-05	up	2.71377	2.71377	1.4403	31	22	Cell Cycle, Lipid Metabolism, Small Molecule Biochemistry
4	Mapk										31	22	Cell Cycle, Lipid Metabolism, Small Molecule Biochemistry
4	Mek										31	22	Cell Cycle, Lipid Metabolism, Small Molecule Biochemistry
4	Pias										31	22	Cell Cycle, Lipid Metabolism, Small Molecule Biochemistry
4	PLA2G4A	phospholipase A2 group IVA	Cytoplasm	enzyme	0.000319621	8.78429e-05	up	2.0774	2.0774	1.05478	31	22	Cell Cycle, Lipid Metabolism, Small Molecule Biochemistry
4	Ppp2c										31	22	Cell Cycle, Lipid Metabolism, Small Molecule Biochemistry
4	Rho gdi										31	22	Cell Cycle, Lipid Metabolism, Small Molecule Biochemistry
4	RPS6KA5	ribosomal protein S6 kinase A5	Nucleus	kinase	0.000896053	0.000519236	up	2.57033	2.57033	1.36195	31	22	Cell Cycle, Lipid Metabolism, Small Molecule Biochemistry
4	SEMA5B	semaphorin 5B	Plasma Membrane	other	0.000621227	0.000281984	down	2.57682	-2.57682	-1.36559	31	22	Cell Cycle, Lipid Metabolism, Small Molecule Biochemistry
4	SIRPB1	signal regulatory protein beta 1	Plasma Membrane	other	9.31449e-05	7.33074e-06	up	7.64011	7.64011	2.93359	31	22	Cell Cycle, Lipid Metabolism, Small Molecule Biochemistry
4	SLC44A2	solute carrier family 44 member 2	Extracellular Space	transporter	0.000270696	6.3668e-05	down	2.19611	-2.19611	-1.13495	31	22	Cell Cycle, Lipid Metabolism, Small Molecule Biochemistry
4	Smad1/5/8										31	22	Cell Cycle, Lipid Metabolism, Small Molecule Biochemistry
4	Sos										31	22	Cell Cycle, Lipid Metabolism, Small Molecule Biochemistry
4	SP100	SP100 nuclear antigen	Nucleus	transcription regulator	0.000850382	0.00047736	up	2.11249	2.11249	1.07894	31	22	Cell Cycle, Lipid Metabolism, Small Molecule Biochemistry
4	sphingomyelinase										31	22	Cell Cycle, Lipid Metabolism, Small Molecule Biochemistry
4	SPRY2	sprouty RTK signaling antagonist 2	Plasma Membrane	other	0.000410306	0.000136093	up	2.82721	2.82721	1.49938	31	22	Cell Cycle, Lipid Metabolism, Small Molecule Biochemistry
4	Srebp										31	22	Cell Cycle, Lipid Metabolism, Small Molecule Biochemistry
4	TAF13	TATA-box binding protein associated factor 13	Nucleus	transcription regulator	0.00113922	0.000750164	up	2.87707	2.87707	1.5246	31	22	Cell Cycle, Lipid Metabolism, Small Molecule Biochemistry
4	TAF9B	TATA-box binding protein associated factor 9b	Nucleus	transcription regulator	6.88576e-05	2.9817e-06	down	2.4706	-2.4706	-1.30486	31	22	Cell Cycle, Lipid Metabolism, Small Molecule Biochemistry
4	TPD52	tumor protein D52	Cytoplasm	other	3.65159e-05	2.46409e-07	down	2.27479	-2.27479	-1.18573	31	22	Cell Cycle, Lipid Metabolism, Small Molecule Biochemistry
4	WSB1	WD repeat and SOCS box containing 1	Other	other	0.000514457	0.000202834	down	2.31514	-2.31514	-1.2111	31	22	Cell Cycle, Lipid Metabolism, Small Molecule Biochemistry
5	26s Proteasome										31	22	Cellular Assembly and Organization, Cellular Function and Maintenance, Nervous System Development and Function
5	Actin										31	22	Cellular Assembly and Organization, Cellular Function and Maintenance, Nervous System Development and Function
5	Alp										31	22	Cellular Assembly and Organization, Cellular Function and Maintenance, Nervous System Development and Function
5	Alpha tubulin										31	22	Cellular Assembly and Organization, Cellular Function and Maintenance, Nervous System Development and Function
5	AMACR	alpha-methylacyl-CoA racemase	Cytoplasm	enzyme	0.000457031	0.000164694	down	2.48248	-2.48248	-1.31178	31	22	Cellular Assembly and Organization, Cellular Function and Maintenance, Nervous System Development and Function
5	ATP6V0D2	ATPase H+ transporting V0 subunit d2	Cytoplasm	transporter	0.000761211	0.000399292	up	2.12224	2.12224	1.08559	31	22	Cellular Assembly and Organization, Cellular Function and Maintenance, Nervous System Development and Function
5	CCDC183	coiled-coil domain containing 183	Other	other	0.000380538	0.000119455	down	2.65138	-2.65138	-1.40675	31	22	Cellular Assembly and Organization, Cellular Function and Maintenance, Nervous System Development and Function
5	Ck2										31	22	Cellular Assembly and Organization, Cellular Function and Maintenance, Nervous System Development and Function
5	Creb										31	22	Cellular Assembly and Organization, Cellular Function and Maintenance, Nervous System Development and Function
5	CTDSPL2	CTD small phosphatase like 2	Nucleus	phosphatase	0.0013138	0.000917318	down	2.52162	-2.52162	-1.33435	31	22	Cellular Assembly and Organization, Cellular Function and Maintenance, Nervous System Development and Function
5	DENND6A	DENN domain containing 6A	Cytoplasm	other	0.000227273	4.40555e-05	down	2.33001	-2.33001	-1.22034	31	22	Cellular Assembly and Organization, Cellular Function and Maintenance, Nervous System Development and Function
5	DNMBP	dynamin binding protein	Cytoplasm	other	0.000123281	1.34256e-05	up	2.22464	2.22464	1.15357	31	22	Cellular Assembly and Organization, Cellular Function and Maintenance, Nervous System Development and Function
5	DPY30	dpy-30, histone methyltransferase complex regulatory subunit	Nucleus	enzyme	2.3646e-05	2.73989e-08	down	2.4923	-2.4923	-1.31748	31	22	Cellular Assembly and Organization, Cellular Function and Maintenance, Nervous System Development and Function
5	FHDC1	FH2 domain containing 1	Other	other	0.000899279	0.000521902	down	3.95331	-3.95331	-1.98306	31	22	Cellular Assembly and Organization, Cellular Function and Maintenance, Nervous System Development and Function
5	GALNT3	polypeptide N-acetylgalactosaminyltransferase 3	Cytoplasm	enzyme	6.1152e-05	2.17153e-06	up	2.46405	2.46405	1.30103	31	22	Cellular Assembly and Organization, Cellular Function and Maintenance, Nervous System Development and Function
5	GBAS	glioblastoma amplified sequence	Plasma Membrane	other	0.000254085	5.54824e-05	down	2.25688	-2.25688	-1.17433	31	22	Cellular Assembly and Organization, Cellular Function and Maintenance, Nervous System Development and Function
5	GPHN	gephyrin	Plasma Membrane	enzyme	0.000595076	0.000261477	down	2.00646	-2.00646	-1.00465	31	22	Cellular Assembly and Organization, Cellular Function and Maintenance, Nervous System Development and Function
5	GTPase										31	22	Cellular Assembly and Organization, Cellular Function and Maintenance, Nervous System Development and Function
5	Hsp70										31	22	Cellular Assembly and Organization, Cellular Function and Maintenance, Nervous System Development and Function
5	ID1	inhibitor of DNA binding 1, HLH protein	Nucleus	transcription regulator	6.27081e-05	2.40082e-06	down	2.32483	-2.32483	-1.21713	31	22	Cellular Assembly and Organization, Cellular Function and Maintenance, Nervous System Development and Function
5	Insulin										31	22	Cellular Assembly and Organization, Cellular Function and Maintenance, Nervous System Development and Function
5	MCU	mitochondrial calcium uniporter	Cytoplasm	ion channel	6.08588e-05	2.15417e-06	down	2.31706	-2.31706	-1.2123	31	22	Cellular Assembly and Organization, Cellular Function and Maintenance, Nervous System Development and Function
5	MTORC1										31	22	Cellular Assembly and Organization, Cellular Function and Maintenance, Nervous System Development and Function
5	NDEL1	nudE neurodevelopment protein 1 like 1	Nucleus	other	9.02543e-05	6.7397e-06	up	2.10114	2.10114	1.07117	31	22	Cellular Assembly and Organization, Cellular Function and Maintenance, Nervous System Development and Function
5	NEFL	neurofilament, light polypeptide	Cytoplasm	other	0.00012962	1.49185e-05	down	2.57733	-2.57733	-1.36588	31	22	Cellular Assembly and Organization, Cellular Function and Maintenance, Nervous System Development and Function
5	NUCKS1	nuclear casein kinase and cyclin-dependent kinase substrate 1	Nucleus	kinase	0.000606727	0.000269889	down	2.08664	-2.08664	-1.06119	31	22	Cellular Assembly and Organization, Cellular Function and Maintenance, Nervous System Development and Function
5	PDE4DIP	phosphodiesterase 4D interacting protein	Cytoplasm	enzyme	0.00265385	0.00219068	up	2.03402	2.03402	1.02434	31	22	Cellular Assembly and Organization, Cellular Function and Maintenance, Nervous System Development and Function
5	Pka catalytic subunit										31	22	Cellular Assembly and Organization, Cellular Function and Maintenance, Nervous System Development and Function
5	Proinsulin										31	22	Cellular Assembly and Organization, Cellular Function and Maintenance, Nervous System Development and Function
5	RNA polymerase II										31	22	Cellular Assembly and Organization, Cellular Function and Maintenance, Nervous System Development and Function
5	SCG5	secretogranin V	Extracellular Space	other	4.9534e-05	1.00408e-06	up	4.95408	4.95408	2.30862	31	22	Cellular Assembly and Organization, Cellular Function and Maintenance, Nervous System Development and Function
5	SEP15	15 kDa selenoprotein	Cytoplasm	enzyme	3.19575e-05	1.09469e-07	down	2.56349	-2.56349	-1.35811	31	22	Cellular Assembly and Organization, Cellular Function and Maintenance, Nervous System Development and Function
5	SNAP25	synaptosome associated protein 25kDa	Plasma Membrane	transporter	0.000114304	1.12265e-05	down	2.84358	-2.84358	-1.50771	31	22	Cellular Assembly and Organization, Cellular Function and Maintenance, Nervous System Development and Function
5	SSR1	signal sequence receptor, alpha	Cytoplasm	other	7.83021e-05	4.54686e-06	down	2.22103	-2.22103	-1.15123	31	22	Cellular Assembly and Organization, Cellular Function and Maintenance, Nervous System Development and Function
5	WIPI1	WD repeat domain, phosphoinositide interacting 1	Cytoplasm	other	6.05334e-05	2.08826e-06	up	2.46982	2.46982	1.30441	31	22	Cellular Assembly and Organization, Cellular Function and Maintenance, Nervous System Development and Function
6	Akt										27	20	Cellular Movement, Cell-To-Cell Signaling and Interaction, Hematological System Development and Function
6	ARTN	artemin	Extracellular Space	growth factor	0.000206984	3.7069e-05	down	2.07866	-2.07866	-1.05565	27	20	Cellular Movement, Cell-To-Cell Signaling and Interaction, Hematological System Development and Function
6	C-C chemokine receptor										27	20	Cellular Movement, Cell-To-Cell Signaling and Interaction, Hematological System Development and Function
6	c-Src										27	20	Cellular Movement, Cell-To-Cell Signaling and Interaction, Hematological System Development and Function
6	CAV2	caveolin 2	Plasma Membrane	other	0.000299487	7.77613e-05	down	2.2358	-2.2358	-1.16079	27	20	Cellular Movement, Cell-To-Cell Signaling and Interaction, Hematological System Development and Function
6	Caveolin										27	20	Cellular Movement, Cell-To-Cell Signaling and Interaction, Hematological System Development and Function
6	CD82	CD82 molecule	Plasma Membrane	other	0.000155574	2.11222e-05	up	2.66006	2.66006	1.41146	27	20	Cellular Movement, Cell-To-Cell Signaling and Interaction, Hematological System Development and Function
6	DHRS3	dehydrogenase/reductase (SDR family) member 3	Cytoplasm	enzyme	5.50777e-05	1.38983e-06	down	2.98607	-2.98607	-1.57825	27	20	Cellular Movement, Cell-To-Cell Signaling and Interaction, Hematological System Development and Function
6	DUT	deoxyuridine triphosphatase	Nucleus	enzyme	0.000180774	2.89799e-05	down	3.33942	-3.33942	-1.7396	27	20	Cellular Movement, Cell-To-Cell Signaling and Interaction, Hematological System Development and Function
6	Ecm										27	20	Cellular Movement, Cell-To-Cell Signaling and Interaction, Hematological System Development and Function
6	ENAH	enabled homolog (Drosophila)	Plasma Membrane	other	0.00010603	9.54714e-06	down	2.97451	-2.97451	-1.57265	27	20	Cellular Movement, Cell-To-Cell Signaling and Interaction, Hematological System Development and Function
6	Filamin										27	20	Cellular Movement, Cell-To-Cell Signaling and Interaction, Hematological System Development and Function
6	FKHR										27	20	Cellular Movement, Cell-To-Cell Signaling and Interaction, Hematological System Development and Function
6	GDF15	growth differentiation factor 15	Extracellular Space	growth factor	0.00194823	0.00151467	up	2.20534	2.20534	1.141	27	20	Cellular Movement, Cell-To-Cell Signaling and Interaction, Hematological System Development and Function
6	Integrin										27	20	Cellular Movement, Cell-To-Cell Signaling and Interaction, Hematological System Development and Function
6	Integrin alpha 3 beta 1										27	20	Cellular Movement, Cell-To-Cell Signaling and Interaction, Hematological System Development and Function
6	Integrin alpha 4 beta 1										27	20	Cellular Movement, Cell-To-Cell Signaling and Interaction, Hematological System Development and Function
6	Integrinβ										27	20	Cellular Movement, Cell-To-Cell Signaling and Interaction, Hematological System Development and Function
6	JINK1/2										27	20	Cellular Movement, Cell-To-Cell Signaling and Interaction, Hematological System Development and Function
6	LCP1	lymphocyte cytosolic protein 1	Cytoplasm	other	0.000136714	1.65312e-05	up	3.16095	3.16095	1.66036	27	20	Cellular Movement, Cell-To-Cell Signaling and Interaction, Hematological System Development and Function
6	Lfa-1										27	20	Cellular Movement, Cell-To-Cell Signaling and Interaction, Hematological System Development and Function
6	LPXN	leupaxin	Cytoplasm	transcription regulator	5.79149e-05	1.75239e-06	up	2.21204	2.21204	1.14538	27	20	Cellular Movement, Cell-To-Cell Signaling and Interaction, Hematological System Development and Function
6	LRIG1	leucine-rich repeats and immunoglobulin like domains 1	Extracellular Space	other	0.000368078	0.000112928	up	2.6276	2.6276	1.39375	27	20	Cellular Movement, Cell-To-Cell Signaling and Interaction, Hematological System Development and Function
6	MYO10	myosin X	Cytoplasm	other	0.000162608	2.2763e-05	up	3.21829	3.21829	1.68629	27	20	Cellular Movement, Cell-To-Cell Signaling and Interaction, Hematological System Development and Function
6	NDFIP1	Nedd4 family interacting protein 1	Cytoplasm	other	0.000278723	6.72383e-05	down	2.1428	-2.1428	-1.0995	27	20	Cellular Movement, Cell-To-Cell Signaling and Interaction, Hematological System Development and Function
6	PLAC8	placenta specific 8	Nucleus	other	5.71384e-05	1.64277e-06	down	2.36696	-2.36696	-1.24304	27	20	Cellular Movement, Cell-To-Cell Signaling and Interaction, Hematological System Development and Function
6	PLAUR	plasminogen activator, urokinase receptor	Plasma Membrane	transmembrane receptor	5.72628e-05	1.70817e-06	up	3.57375	3.57375	1.83744	27	20	Cellular Movement, Cell-To-Cell Signaling and Interaction, Hematological System Development and Function
6	Ptk										27	20	Cellular Movement, Cell-To-Cell Signaling and Interaction, Hematological System Development and Function
6	RDH10	retinol dehydrogenase 10 (all-trans)	Nucleus	enzyme	0.00180195	0.00137543	down	3.43556	-3.43556	-1.78055	27	20	Cellular Movement, Cell-To-Cell Signaling and Interaction, Hematological System Development and Function
6	RHOB	ras homolog family member B	Cytoplasm	enzyme	6.81397e-05	2.79312e-06	down	3.93244	-3.93244	-1.97543	27	20	Cellular Movement, Cell-To-Cell Signaling and Interaction, Hematological System Development and Function
6	SEMA6D	semaphorin 6D	Plasma Membrane	other	0.000594512	0.000260818	down	2.52299	-2.52299	-1.33513	27	20	Cellular Movement, Cell-To-Cell Signaling and Interaction, Hematological System Development and Function
6	SEMA7A	semaphorin 7A (John Milton Hagen blood group)	Plasma Membrane	transmembrane receptor	7.21903e-05	3.52387e-06	up	3.20441	3.20441	1.68006	27	20	Cellular Movement, Cell-To-Cell Signaling and Interaction, Hematological System Development and Function
6	SIGLEC15	sialic acid binding Ig like lectin 15	Plasma Membrane	other	0.000106445	9.73534e-06	up	6.60921	6.60921	2.72448	27	20	Cellular Movement, Cell-To-Cell Signaling and Interaction, Hematological System Development and Function
6	SWAP70	SWAP switching B-cell complex 70kDa subunit	Cytoplasm	other	5.71384e-05	1.62624e-06	down	2.19703	-2.19703	-1.13556	27	20	Cellular Movement, Cell-To-Cell Signaling and Interaction, Hematological System Development and Function
6	TGFBR										27	20	Cellular Movement, Cell-To-Cell Signaling and Interaction, Hematological System Development and Function
7	C1D	C1D nuclear receptor corepressor	Nucleus	transcription regulator	0.000118722	1.22951e-05	down	2.52776	-2.52776	-1.33786	26	20	Organ Morphology, Dermatological Diseases and Conditions, Endocrine System Development and Function
7	Cadherin										26	20	Organ Morphology, Dermatological Diseases and Conditions, Endocrine System Development and Function
7	CDH6	cadherin 6	Plasma Membrane	other	5.28114e-05	1.29647e-06	down	2.96946	-2.96946	-1.5702	26	20	Organ Morphology, Dermatological Diseases and Conditions, Endocrine System Development and Function
7	COL13A1	collagen type XIII alpha 1	Plasma Membrane	other	0.000438312	0.000152549	up	2.00617	2.00617	1.00444	26	20	Organ Morphology, Dermatological Diseases and Conditions, Endocrine System Development and Function
7	DNAJB9	DnaJ heat shock protein family (Hsp40) member B9	Nucleus	other	0.000310326	8.254e-05	up	2.37686	2.37686	1.24906	26	20	Organ Morphology, Dermatological Diseases and Conditions, Endocrine System Development and Function
7	EGR1	early growth response 1	Nucleus	transcription regulator	0.000910266	0.000531525	down	2.02311	-2.02311	-1.01658	26	20	Organ Morphology, Dermatological Diseases and Conditions, Endocrine System Development and Function
7	estrogen receptor										26	20	Organ Morphology, Dermatological Diseases and Conditions, Endocrine System Development and Function
7	Growth hormone										26	20	Organ Morphology, Dermatological Diseases and Conditions, Endocrine System Development and Function
7	GUCY1B3	guanylate cyclase 1, soluble, beta 3	Cytoplasm	enzyme	0.000294466	7.54152e-05	down	2.03253	-2.03253	-1.02328	26	20	Organ Morphology, Dermatological Diseases and Conditions, Endocrine System Development and Function
7	histone deacetylase										26	20	Organ Morphology, Dermatological Diseases and Conditions, Endocrine System Development and Function
7	IFI44L	interferon induced protein 44 like	Nucleus	other	0.000293744	7.49843e-05	up	2.10705	2.10705	1.07522	26	20	Organ Morphology, Dermatological Diseases and Conditions, Endocrine System Development and Function
7	IGFBP3	insulin like growth factor binding protein 3	Extracellular Space	other	2.3646e-05	3.67681e-08	down	2.30432	-2.30432	-1.20434	26	20	Organ Morphology, Dermatological Diseases and Conditions, Endocrine System Development and Function
7	INTERLEUKIN										26	20	Organ Morphology, Dermatological Diseases and Conditions, Endocrine System Development and Function
7	ME1	malic enzyme 1	Cytoplasm	enzyme	8.46898e-05	5.81387e-06	down	2.50435	-2.50435	-1.32443	26	20	Organ Morphology, Dermatological Diseases and Conditions, Endocrine System Development and Function
7	MMP1	matrix metallopeptidase 1	Extracellular Space	peptidase	2.99009e-05	6.82824e-08	up	3.68258	3.68258	1.88072	26	20	Organ Morphology, Dermatological Diseases and Conditions, Endocrine System Development and Function
7	N-cor										26	20	Organ Morphology, Dermatological Diseases and Conditions, Endocrine System Development and Function
7	NT5E	5'-nucleotidase ecto	Plasma Membrane	phosphatase	8.09449e-05	5.25908e-06	up	3.37637	3.37637	1.75547	26	20	Organ Morphology, Dermatological Diseases and Conditions, Endocrine System Development and Function
7	OAS3	2'-5'-oligoadenylate synthetase 3	Cytoplasm	enzyme	0.000375918	0.00011733	up	2.42183	2.42183	1.2761	26	20	Organ Morphology, Dermatological Diseases and Conditions, Endocrine System Development and Function
7	PKDCC	protein kinase domain containing, cytoplasmic	Cytoplasm	kinase	0.00027058	6.32901e-05	down	2.34171	-2.34171	-1.22756	26	20	Organ Morphology, Dermatological Diseases and Conditions, Endocrine System Development and Function
7	Rar										26	20	Organ Morphology, Dermatological Diseases and Conditions, Endocrine System Development and Function
7	ROBO4	roundabout guidance receptor 4	Plasma Membrane	other	0.00240454	0.0019518	up	4.75767	4.75767	2.25026	26	20	Organ Morphology, Dermatological Diseases and Conditions, Endocrine System Development and Function
7	Rxr										26	20	Organ Morphology, Dermatological Diseases and Conditions, Endocrine System Development and Function
7	secreted MMP										26	20	Organ Morphology, Dermatological Diseases and Conditions, Endocrine System Development and Function
7	SERP1	stress-associated endoplasmic reticulum protein 1	Cytoplasm	other	7.47863e-05	4.12444e-06	up	3.26233	3.26233	1.7059	26	20	Organ Morphology, Dermatological Diseases and Conditions, Endocrine System Development and Function
7	SLC19A2	solute carrier family 19 member 2	Plasma Membrane	transporter	0.000225409	4.33162e-05	up	2.20476	2.20476	1.14062	26	20	Organ Morphology, Dermatological Diseases and Conditions, Endocrine System Development and Function
7	TBL1X	transducin (beta)-like 1X-linked	Nucleus	transcription regulator	7.36928e-05	3.95656e-06	down	2.03937	-2.03937	-1.02812	26	20	Organ Morphology, Dermatological Diseases and Conditions, Endocrine System Development and Function
7	THRB	thyroid hormone receptor beta	Nucleus	ligand-dependent nuclear receptor	0.000438312	0.000152593	down	3.65533	-3.65533	-1.87	26	20	Organ Morphology, Dermatological Diseases and Conditions, Endocrine System Development and Function
7	thymidine kinase										26	20	Organ Morphology, Dermatological Diseases and Conditions, Endocrine System Development and Function
7	thyroid hormone receptor										26	20	Organ Morphology, Dermatological Diseases and Conditions, Endocrine System Development and Function
7	Timp										26	20	Organ Morphology, Dermatological Diseases and Conditions, Endocrine System Development and Function
7	trypsin										26	20	Organ Morphology, Dermatological Diseases and Conditions, Endocrine System Development and Function
7	USP36	ubiquitin specific peptidase 36	Nucleus	peptidase	7.12791e-05	3.39386e-06	up	2.06863	2.06863	1.04868	26	20	Organ Morphology, Dermatological Diseases and Conditions, Endocrine System Development and Function
7	VDR	vitamin D (1,25- dihydroxyvitamin D3) receptor	Nucleus	transcription regulator	0.000664155	0.000317745	up	3.17167	3.17167	1.66524	26	20	Organ Morphology, Dermatological Diseases and Conditions, Endocrine System Development and Function
7	Vegf										26	20	Organ Morphology, Dermatological Diseases and Conditions, Endocrine System Development and Function
7	VitaminD3-VDR-RXR										26	20	Organ Morphology, Dermatological Diseases and Conditions, Endocrine System Development and Function
8	ADD3	adducin 3	Cytoplasm	other	4.76218e-05	8.21065e-07	down	2.36919	-2.36919	-1.24439	26	20	Cell-To-Cell Signaling and Interaction, Cellular Movement, Hematological System Development and Function
8	ASB9	ankyrin repeat and SOCS box containing 9	Nucleus	transcription regulator	0.000877494	0.000502069	down	2.715	-2.715	-1.44095	26	20	Cell-To-Cell Signaling and Interaction, Cellular Movement, Hematological System Development and Function
8	ATPase										26	20	Cell-To-Cell Signaling and Interaction, Cellular Movement, Hematological System Development and Function
8	C3	complement component 3	Extracellular Space	peptidase	0.000166276	2.38974e-05	up	3.15758	3.15758	1.65882	26	20	Cell-To-Cell Signaling and Interaction, Cellular Movement, Hematological System Development and Function
8	CCL20	C-C motif chemokine ligand 20	Extracellular Space	cytokine	0.00012705	1.42377e-05	up	3.12207	3.12207	1.6425	26	20	Cell-To-Cell Signaling and Interaction, Cellular Movement, Hematological System Development and Function
8	CD40	CD40 molecule	Plasma Membrane	transmembrane receptor	9.69248e-05	8.01981e-06	up	2.53917	2.53917	1.34436	26	20	Cell-To-Cell Signaling and Interaction, Cellular Movement, Hematological System Development and Function
8	CFI	complement factor I	Extracellular Space	peptidase	0.000113272	1.09702e-05	down	2.57781	-2.57781	-1.36614	26	20	Cell-To-Cell Signaling and Interaction, Cellular Movement, Hematological System Development and Function
8	chemokine										26	20	Cell-To-Cell Signaling and Interaction, Cellular Movement, Hematological System Development and Function
8	Cr3										26	20	Cell-To-Cell Signaling and Interaction, Cellular Movement, Hematological System Development and Function
8	creatine kinase										26	20	Cell-To-Cell Signaling and Interaction, Cellular Movement, Hematological System Development and Function
8	CXCL1	C-X-C motif chemokine ligand 1	Extracellular Space	cytokine	7.2018e-05	3.46222e-06	up	2.66667	2.66667	1.41504	26	20	Cell-To-Cell Signaling and Interaction, Cellular Movement, Hematological System Development and Function
8	CXCL3	C-X-C motif chemokine ligand 3	Extracellular Space	cytokine	0.000453284	0.000162494	up	3.10131	3.10131	1.63288	26	20	Cell-To-Cell Signaling and Interaction, Cellular Movement, Hematological System Development and Function
8	CXCL8	C-X-C motif chemokine ligand 8	Extracellular Space	cytokine	4.70395e-05	7.41202e-07	up	6.01014	6.01014	2.5874	26	20	Cell-To-Cell Signaling and Interaction, Cellular Movement, Hematological System Development and Function
8	CXCL11	C-X-C motif chemokine ligand 11	Other	cytokine	0.000621227	0.000282085	up	2.52305	2.52305	1.33517	26	20	Cell-To-Cell Signaling and Interaction, Cellular Movement, Hematological System Development and Function
8	CYB5R4	cytochrome b5 reductase 4	Cytoplasm	enzyme	4.63841e-05	6.92223e-07	down	2.04363	-2.04363	-1.03113	26	20	Cell-To-Cell Signaling and Interaction, Cellular Movement, Hematological System Development and Function
8	DOCK4	dedicator of cytokinesis 4	Plasma Membrane	other	3.0027e-05	8.92081e-08	up	3.29638	3.29638	1.72088	26	20	Cell-To-Cell Signaling and Interaction, Cellular Movement, Hematological System Development and Function
8	elastase										26	20	Cell-To-Cell Signaling and Interaction, Cellular Movement, Hematological System Development and Function
8	F3	coagulation factor III, tissue factor	Plasma Membrane	transmembrane receptor	0.000167293	2.45862e-05	up	2.83358	2.83358	1.50263	26	20	Cell-To-Cell Signaling and Interaction, Cellular Movement, Hematological System Development and Function
8	Fibrinogen										26	20	Cell-To-Cell Signaling and Interaction, Cellular Movement, Hematological System Development and Function
8	HMOX1	heme oxygenase 1	Cytoplasm	enzyme	3.07978e-05	1.0198e-07	up	7.17615	7.17615	2.84321	26	20	Cell-To-Cell Signaling and Interaction, Cellular Movement, Hematological System Development and Function
8	ICAM1	intercellular adhesion molecule 1	Plasma Membrane	transmembrane receptor	4.25833e-05	4.82261e-07	up	4.88337	4.88337	2.28788	26	20	Cell-To-Cell Signaling and Interaction, Cellular Movement, Hematological System Development and Function
8	Il8r										26	20	Cell-To-Cell Signaling and Interaction, Cellular Movement, Hematological System Development and Function
8	LDL										26	20	Cell-To-Cell Signaling and Interaction, Cellular Movement, Hematological System Development and Function
8	MMP14	matrix metallopeptidase 14	Extracellular Space	peptidase	5.71384e-05	1.58188e-06	up	2.21198	2.21198	1.14534	26	20	Cell-To-Cell Signaling and Interaction, Cellular Movement, Hematological System Development and Function
8	NADPH oxidase										26	20	Cell-To-Cell Signaling and Interaction, Cellular Movement, Hematological System Development and Function
8	P2RY2	purinergic receptor P2Y2	Plasma Membrane	G-protein coupled receptor	0.000285062	7.05316e-05	up	2.09703	2.09703	1.06835	26	20	Cell-To-Cell Signaling and Interaction, Cellular Movement, Hematological System Development and Function
8	Pdgf (complex)										26	20	Cell-To-Cell Signaling and Interaction, Cellular Movement, Hematological System Development and Function
8	PDGF BB										26	20	Cell-To-Cell Signaling and Interaction, Cellular Movement, Hematological System Development and Function
8	PI3K (family)										26	20	Cell-To-Cell Signaling and Interaction, Cellular Movement, Hematological System Development and Function
8	Pld										26	20	Cell-To-Cell Signaling and Interaction, Cellular Movement, Hematological System Development and Function
8	Rock										26	20	Cell-To-Cell Signaling and Interaction, Cellular Movement, Hematological System Development and Function
8	SLC6A6	solute carrier family 6 member 6	Plasma Membrane	transporter	0.000127232	1.43531e-05	down	2.39218	-2.39218	-1.25833	26	20	Cell-To-Cell Signaling and Interaction, Cellular Movement, Hematological System Development and Function
8	TMEM11	transmembrane protein 11	Plasma Membrane	G-protein coupled receptor	0.000215082	3.97845e-05	down	2.2187	-2.2187	-1.14972	26	20	Cell-To-Cell Signaling and Interaction, Cellular Movement, Hematological System Development and Function
8	tyrosine kinase										26	20	Cell-To-Cell Signaling and Interaction, Cellular Movement, Hematological System Development and Function
8	XDH	xanthine dehydrogenase	Cytoplasm	enzyme	0.000240351	4.90388e-05	up	2.04405	2.04405	1.03143	26	20	Cell-To-Cell Signaling and Interaction, Cellular Movement, Hematological System Development and Function
9	ANLN	anillin actin binding protein	Cytoplasm	other	8.06388e-05	5.08741e-06	down	3.42713	-3.42713	-1.777	25	19	Cancer, Endocrine System Disorders, Organismal Injury and Abnormalities
9	APOL3	apolipoprotein L3	Cytoplasm	transporter	0.00400959	0.00352842	up	2.17757	2.17757	1.12272	25	19	Cancer, Endocrine System Disorders, Organismal Injury and Abnormalities
9	Caspase 3/7										25	19	Cancer, Endocrine System Disorders, Organismal Injury and Abnormalities
9	CDKN1A	cyclin-dependent kinase inhibitor 1A	Nucleus	kinase	0.000177018	2.76906e-05	up	2.34183	2.34183	1.22764	25	19	Cancer, Endocrine System Disorders, Organismal Injury and Abnormalities
9	CNOT6	CCR4-NOT transcription complex subunit 6	Nucleus	enzyme	0.00050315	0.000194611	down	2.20555	-2.20555	-1.14114	25	19	Cancer, Endocrine System Disorders, Organismal Injury and Abnormalities
9	CSF2	colony stimulating factor 2	Extracellular Space	cytokine	0.000181511	2.91396e-05	up	3.2134	3.2134	1.6841	25	19	Cancer, Endocrine System Disorders, Organismal Injury and Abnormalities
9	Cyclin B										25	19	Cancer, Endocrine System Disorders, Organismal Injury and Abnormalities
9	CYP										25	19	Cancer, Endocrine System Disorders, Organismal Injury and Abnormalities
9	ELF3	E74 like ETS transcription factor 3	Nucleus	transcription regulator	6.05334e-05	1.99347e-06	down	2.80437	-2.80437	-1.48768	25	19	Cancer, Endocrine System Disorders, Organismal Injury and Abnormalities
9	Gsk3										25	19	Cancer, Endocrine System Disorders, Organismal Injury and Abnormalities
9	IFI44	interferon induced protein 44	Cytoplasm	other	0.000286069	7.09782e-05	up	2.08619	2.08619	1.06087	25	19	Cancer, Endocrine System Disorders, Organismal Injury and Abnormalities
9	IFN Beta										25	19	Cancer, Endocrine System Disorders, Organismal Injury and Abnormalities
9	IgG1										25	19	Cancer, Endocrine System Disorders, Organismal Injury and Abnormalities
9	Igg3										25	19	Cancer, Endocrine System Disorders, Organismal Injury and Abnormalities
9	Igm										25	19	Cancer, Endocrine System Disorders, Organismal Injury and Abnormalities
9	IL12 (family)										25	19	Cancer, Endocrine System Disorders, Organismal Injury and Abnormalities
9	ILF3	interleukin enhancer binding factor 3	Nucleus	transcription regulator	4.25833e-05	4.81981e-07	down	2.13305	-2.13305	-1.09292	25	19	Cancer, Endocrine System Disorders, Organismal Injury and Abnormalities
9	Immunoglobulin										25	19	Cancer, Endocrine System Disorders, Organismal Injury and Abnormalities
9	INHBA	inhibin beta A	Extracellular Space	growth factor	6.18657e-05	2.29577e-06	up	3.71771	3.71771	1.89441	25	19	Cancer, Endocrine System Disorders, Organismal Injury and Abnormalities
9	Interferon alpha										25	19	Cancer, Endocrine System Disorders, Organismal Injury and Abnormalities
9	MHC CLASS I (family)										25	19	Cancer, Endocrine System Disorders, Organismal Injury and Abnormalities
9	NAV3	neuron navigator 3	Nucleus	other	0.000108193	9.9941e-06	up	2.39898	2.39898	1.26242	25	19	Cancer, Endocrine System Disorders, Organismal Injury and Abnormalities
9	PHB2	prohibitin 2	Cytoplasm	transcription regulator	8.50289e-05	5.93702e-06	down	2.19986	-2.19986	-1.13741	25	19	Cancer, Endocrine System Disorders, Organismal Injury and Abnormalities
9	REC8	REC8 meiotic recombination protein	Nucleus	other	0.000796046	0.0004302	up	2.0942	2.0942	1.0664	25	19	Cancer, Endocrine System Disorders, Organismal Injury and Abnormalities
9	RPSA	ribosomal protein SA	Cytoplasm	translation regulator	4.9534e-05	1.00921e-06	up	4.16121	4.16121	2.057	25	19	Cancer, Endocrine System Disorders, Organismal Injury and Abnormalities
9	SGK2	SGK2, serine/threonine kinase 2	Cytoplasm	kinase	0.00024621	5.17158e-05	down	2.09053	-2.09053	-1.06387	25	19	Cancer, Endocrine System Disorders, Organismal Injury and Abnormalities
9	SKA1	spindle and kinetochore associated complex subunit 1	Nucleus	other	5.71384e-05	1.6748e-06	down	3.55249	-3.55249	-1.82883	25	19	Cancer, Endocrine System Disorders, Organismal Injury and Abnormalities
9	SLFN5	schlafen family member 5	Nucleus	enzyme	0.000802502	0.000436345	up	2.17454	2.17454	1.12071	25	19	Cancer, Endocrine System Disorders, Organismal Injury and Abnormalities
9	Smad										25	19	Cancer, Endocrine System Disorders, Organismal Injury and Abnormalities
9	STAT										25	19	Cancer, Endocrine System Disorders, Organismal Injury and Abnormalities
9	STAT1	signal transducer and activator of transcription 1	Nucleus	transcription regulator	0.000127302	1.44319e-05	down	2.48387	-2.48387	-1.31259	25	19	Cancer, Endocrine System Disorders, Organismal Injury and Abnormalities
9	STAT5a/b										25	19	Cancer, Endocrine System Disorders, Organismal Injury and Abnormalities
9	TAP1	transporter 1, ATP-binding cassette, sub-family B (MDR/TAP)	Cytoplasm	transporter	4.66557e-05	7.245e-07	up	2.08292	2.08292	1.05861	25	19	Cancer, Endocrine System Disorders, Organismal Injury and Abnormalities
9	Tgf beta										25	19	Cancer, Endocrine System Disorders, Organismal Injury and Abnormalities
9	TWF1	twinfilin actin binding protein 1	Cytoplasm	kinase	4.9534e-05	9.45398e-07	down	3.5115	-3.5115	-1.81209	25	19	Cancer, Endocrine System Disorders, Organismal Injury and Abnormalities
10	ACBD5	acyl-CoA binding domain containing 5	Nucleus	other	0.000127741	1.46002e-05	down	3.04728	-3.04728	-1.60752	24	18	Cell-To-Cell Signaling and Interaction, Cell Morphology, Cellular Function and Maintenance
10	ADAMTS18	ADAM metallopeptidase with thrombospondin type 1 motif 18	Extracellular Space	peptidase	0.000518353	0.000206264	up	6.31978	6.31978	2.65987	24	18	Cell-To-Cell Signaling and Interaction, Cell Morphology, Cellular Function and Maintenance
10	ATP6AP1										24	18	Cell-To-Cell Signaling and Interaction, Cell Morphology, Cellular Function and Maintenance
10	ATP6V1B1										24	18	Cell-To-Cell Signaling and Interaction, Cell Morphology, Cellular Function and Maintenance
10	DAPP1										24	18	Cell-To-Cell Signaling and Interaction, Cell Morphology, Cellular Function and Maintenance
10	FAM13A	family with sequence similarity 13 member A	Cytoplasm	other	8.1074e-05	5.39691e-06	down	3.13146	-3.13146	-1.64684	24	18	Cell-To-Cell Signaling and Interaction, Cell Morphology, Cellular Function and Maintenance
10	FGFBP1										24	18	Cell-To-Cell Signaling and Interaction, Cell Morphology, Cellular Function and Maintenance
10	HMGA2	high mobility group AT-hook 2	Nucleus	enzyme	7.36928e-05	3.96405e-06	up	2.57121	2.57121	1.36245	24	18	Cell-To-Cell Signaling and Interaction, Cell Morphology, Cellular Function and Maintenance
10	HMGB3										24	18	Cell-To-Cell Signaling and Interaction, Cell Morphology, Cellular Function and Maintenance
10	ICAM3										24	18	Cell-To-Cell Signaling and Interaction, Cell Morphology, Cellular Function and Maintenance
10	ITGB6	integrin subunit beta 6	Plasma Membrane	other	0.000220499	4.13446e-05	down	2.73909	-2.73909	-1.4537	24	18	Cell-To-Cell Signaling and Interaction, Cell Morphology, Cellular Function and Maintenance
10	KCNK1	potassium two pore domain channel subfamily K member 1	Plasma Membrane	ion channel	0.00012766	1.45505e-05	up	2.38766	2.38766	1.2556	24	18	Cell-To-Cell Signaling and Interaction, Cell Morphology, Cellular Function and Maintenance
10	KLHL7	kelch like family member 7	Nucleus	other	6.05334e-05	2.02976e-06	down	2.58584	-2.58584	-1.37063	24	18	Cell-To-Cell Signaling and Interaction, Cell Morphology, Cellular Function and Maintenance
10	KYNU										24	18	Cell-To-Cell Signaling and Interaction, Cell Morphology, Cellular Function and Maintenance
10	MAPK7										24	18	Cell-To-Cell Signaling and Interaction, Cell Morphology, Cellular Function and Maintenance
10	MAZ										24	18	Cell-To-Cell Signaling and Interaction, Cell Morphology, Cellular Function and Maintenance
10	MYO1E										24	18	Cell-To-Cell Signaling and Interaction, Cell Morphology, Cellular Function and Maintenance
10	NXF1										24	18	Cell-To-Cell Signaling and Interaction, Cell Morphology, Cellular Function and Maintenance
10	PAQR3										24	18	Cell-To-Cell Signaling and Interaction, Cell Morphology, Cellular Function and Maintenance
10	PLCL2										24	18	Cell-To-Cell Signaling and Interaction, Cell Morphology, Cellular Function and Maintenance
10	PNISR	PNN-interacting serine/arginine-rich protein	Nucleus	other	0.000196726	3.41515e-05	down	2.09629	-2.09629	-1.06784	24	18	Cell-To-Cell Signaling and Interaction, Cell Morphology, Cellular Function and Maintenance
10	PNP	purine nucleoside phosphorylase	Nucleus	enzyme	0.000136714	1.65212e-05	up	2.01143	2.01143	1.00822	24	18	Cell-To-Cell Signaling and Interaction, Cell Morphology, Cellular Function and Maintenance
10	PODXL	podocalyxin like	Plasma Membrane	kinase	6.8669e-05	2.89323e-06	up	2.31816	2.31816	1.21298	24	18	Cell-To-Cell Signaling and Interaction, Cell Morphology, Cellular Function and Maintenance
10	PTBP1										24	18	Cell-To-Cell Signaling and Interaction, Cell Morphology, Cellular Function and Maintenance
10	RAF1										24	18	Cell-To-Cell Signaling and Interaction, Cell Morphology, Cellular Function and Maintenance
10	RAVER2	ribonucleoprotein, PTB binding 2	Nucleus	other	0.000109886	1.02885e-05	down	2.35778	-2.35778	-1.23743	24	18	Cell-To-Cell Signaling and Interaction, Cell Morphology, Cellular Function and Maintenance
10	SARAF	store-operated calcium entry-associated regulatory factor	Cytoplasm	other	3.65159e-05	2.34428e-07	down	2.91797	-2.91797	-1.54496	24	18	Cell-To-Cell Signaling and Interaction, Cell Morphology, Cellular Function and Maintenance
10	SLC35F6	solute carrier family 35 member F6	Cytoplasm	other	0.000103066	8.90855e-06	down	2.25392	-2.25392	-1.17244	24	18	Cell-To-Cell Signaling and Interaction, Cell Morphology, Cellular Function and Maintenance
10	SPRED1										24	18	Cell-To-Cell Signaling and Interaction, Cell Morphology, Cellular Function and Maintenance
10	SRPK2										24	18	Cell-To-Cell Signaling and Interaction, Cell Morphology, Cellular Function and Maintenance
10	TM4SF19	transmembrane 4 L six family member 19	Other	other	0.000249775	5.35576e-05	up	2.44012	2.44012	1.28695	24	18	Cell-To-Cell Signaling and Interaction, Cell Morphology, Cellular Function and Maintenance
10	TMEM192	transmembrane protein 192	Cytoplasm	other	6.95703e-05	3.07418e-06	down	2.90548	-2.90548	-1.53877	24	18	Cell-To-Cell Signaling and Interaction, Cell Morphology, Cellular Function and Maintenance
10	ZAK	sterile alpha motif and leucine zipper containing kinase AZK	Cytoplasm	kinase	4.9534e-05	9.30809e-07	down	3.37023	-3.37023	-1.75285	24	18	Cell-To-Cell Signaling and Interaction, Cell Morphology, Cellular Function and Maintenance
10	ZBED6CL	ZBED6 C-terminal like	Other	other	0.000277673	6.65489e-05	down	2.06833	-2.06833	-1.04846	24	18	Cell-To-Cell Signaling and Interaction, Cell Morphology, Cellular Function and Maintenance
10	ZNF680	zinc finger protein 680	Nucleus	other	0.000791957	0.000426608	down	2.11313	-2.11313	-1.07938	24	18	Cell-To-Cell Signaling and Interaction, Cell Morphology, Cellular Function and Maintenance
11	AIMP1	aminoacyl tRNA synthetase complex-interacting multifunctional protein 1	Extracellular Space	cytokine	0.00061013	0.000272183	down	2.17524	-2.17524	-1.12117	22	18	Cardiac Necrosis/Cell Death, Cardiovascular Disease, Cell Death and Survival
11	Alpha Actinin										22	18	Cardiac Necrosis/Cell Death, Cardiovascular Disease, Cell Death and Survival
11	ANTXR2	anthrax toxin receptor 2	Plasma Membrane	transmembrane receptor	5.23957e-05	1.20403e-06	up	5.25029	5.25029	2.3924	22	18	Cardiac Necrosis/Cell Death, Cardiovascular Disease, Cell Death and Survival
11	Collagen type II										22	18	Cardiac Necrosis/Cell Death, Cardiovascular Disease, Cell Death and Survival
11	Collagen type III										22	18	Cardiac Necrosis/Cell Death, Cardiovascular Disease, Cell Death and Survival
11	Collagen type IV										22	18	Cardiac Necrosis/Cell Death, Cardiovascular Disease, Cell Death and Survival
11	Collagen(s)										22	18	Cardiac Necrosis/Cell Death, Cardiovascular Disease, Cell Death and Survival
11	ERK1/2										22	18	Cardiac Necrosis/Cell Death, Cardiovascular Disease, Cell Death and Survival
11	Fibrin										22	18	Cardiac Necrosis/Cell Death, Cardiovascular Disease, Cell Death and Survival
11	GAL3ST1	galactose-3-O-sulfotransferase 1	Cytoplasm	enzyme	7.01231e-05	3.15466e-06	down	2.06855	-2.06855	-1.04862	22	18	Cardiac Necrosis/Cell Death, Cardiovascular Disease, Cell Death and Survival
11	gelatinase										22	18	Cardiac Necrosis/Cell Death, Cardiovascular Disease, Cell Death and Survival
11	HERPUD1	homocysteine inducible ER protein with ubiquitin like domain 1	Cytoplasm	other	6.854e-05	2.87996e-06	up	3.03957	3.03957	1.60387	22	18	Cardiac Necrosis/Cell Death, Cardiovascular Disease, Cell Death and Survival
11	IMPA2	inositol monophosphatase 2	Cytoplasm	phosphatase	0.000179469	2.84106e-05	down	3.52874	-3.52874	-1.81915	22	18	Cardiac Necrosis/Cell Death, Cardiovascular Disease, Cell Death and Survival
11	ITGB6	integrin subunit beta 6	Plasma Membrane	other	0.000220499	4.13446e-05	down	2.73909	-2.73909	-1.4537	22	18	Cardiac Necrosis/Cell Death, Cardiovascular Disease, Cell Death and Survival
11	KLRC1	killer cell lectin like receptor C1	Plasma Membrane	transmembrane receptor	6.68109e-05	2.69456e-06	up	3.83336	3.83336	1.93861	22	18	Cardiac Necrosis/Cell Death, Cardiovascular Disease, Cell Death and Survival
11	Laminin										22	18	Cardiac Necrosis/Cell Death, Cardiovascular Disease, Cell Death and Survival
11	MIR17HG	miR-17-92a-1 cluster host gene	Other	other	0.000810491	0.000443466	down	2.15606	-2.15606	-1.1084	22	18	Cardiac Necrosis/Cell Death, Cardiovascular Disease, Cell Death and Survival
11	N-type Calcium Channel										22	18	Cardiac Necrosis/Cell Death, Cardiovascular Disease, Cell Death and Survival
11	Pdgf Ab										22	18	Cardiac Necrosis/Cell Death, Cardiovascular Disease, Cell Death and Survival
11	PDGF-AA										22	18	Cardiac Necrosis/Cell Death, Cardiovascular Disease, Cell Death and Survival
11	Pkg										22	18	Cardiac Necrosis/Cell Death, Cardiovascular Disease, Cell Death and Survival
11	PLAT	plasminogen activator, tissue type	Extracellular Space	peptidase	0.000324331	9.0357e-05	up	2.93037	2.93037	1.55108	22	18	Cardiac Necrosis/Cell Death, Cardiovascular Disease, Cell Death and Survival
11	Plc beta										22	18	Cardiac Necrosis/Cell Death, Cardiovascular Disease, Cell Death and Survival
11	PLCB4	phospholipase C beta 4	Cytoplasm	enzyme	0.000577089	0.000248086	down	2.07794	-2.07794	-1.05515	22	18	Cardiac Necrosis/Cell Death, Cardiovascular Disease, Cell Death and Survival
11	PRDM8	PR domain 8	Nucleus	transcription regulator	0.000719475	0.000364913	up	2.53127	2.53127	1.33986	22	18	Cardiac Necrosis/Cell Death, Cardiovascular Disease, Cell Death and Survival
11	Rab5										22	18	Cardiac Necrosis/Cell Death, Cardiovascular Disease, Cell Death and Survival
11	Rab11										22	18	Cardiac Necrosis/Cell Death, Cardiovascular Disease, Cell Death and Survival
11	RAB11FIP1	RAB11 family interacting protein 1	Cytoplasm	other	0.000464526	0.000170497	down	3.11373	-3.11373	-1.63864	22	18	Cardiac Necrosis/Cell Death, Cardiovascular Disease, Cell Death and Survival
11	RGS3	regulator of G-protein signaling 3	Nucleus	other	0.00146999	0.00106616	up	2.21155	2.21155	1.14506	22	18	Cardiac Necrosis/Cell Death, Cardiovascular Disease, Cell Death and Survival
11	RGS4	regulator of G-protein signaling 4	Cytoplasm	other	4.9534e-05	9.97018e-07	up	2.89909	2.89909	1.5356	22	18	Cardiac Necrosis/Cell Death, Cardiovascular Disease, Cell Death and Survival
11	SEMA6A	semaphorin 6A	Plasma Membrane	transmembrane receptor	0.000689694	0.000340277	down	2.06704	-2.06704	-1.04756	22	18	Cardiac Necrosis/Cell Death, Cardiovascular Disease, Cell Death and Survival
11	SERPINB7	serpin family B member 7	Cytoplasm	other	0.00069412	0.000343731	up	2.89034	2.89034	1.53124	22	18	Cardiac Necrosis/Cell Death, Cardiovascular Disease, Cell Death and Survival
11	SMAD1/5										22	18	Cardiac Necrosis/Cell Death, Cardiovascular Disease, Cell Death and Survival
11	THBD	thrombomodulin	Plasma Membrane	transmembrane receptor	8.17504e-05	5.46994e-06	up	3.21574	3.21574	1.68515	22	18	Cardiac Necrosis/Cell Death, Cardiovascular Disease, Cell Death and Survival
11	TPCN1	two pore segment channel 1	Plasma Membrane	ion channel	0.000102976	8.88898e-06	up	2.02403	2.02403	1.01723	22	18	Cardiac Necrosis/Cell Death, Cardiovascular Disease, Cell Death and Survival
12	ADRB										22	18	Digestive System Development and Function, Embryonic Development, Organismal Development
12	ALDH										22	18	Digestive System Development and Function, Embryonic Development, Organismal Development
12	ALDH1A1	aldehyde dehydrogenase 1 family member A1	Cytoplasm	enzyme	4.38315e-05	5.73166e-07	down	3.45275	-3.45275	-1.78775	22	18	Digestive System Development and Function, Embryonic Development, Organismal Development
12	ARID4A	AT-rich interaction domain 4A	Nucleus	transcription regulator	0.00031447	8.54576e-05	down	2.07523	-2.07523	-1.05327	22	18	Digestive System Development and Function, Embryonic Development, Organismal Development
12	C8										22	18	Digestive System Development and Function, Embryonic Development, Organismal Development
12	calpain										22	18	Digestive System Development and Function, Embryonic Development, Organismal Development
12	Casein										22	18	Digestive System Development and Function, Embryonic Development, Organismal Development
12	CCL2	C-C motif chemokine ligand 2	Extracellular Space	cytokine	5.71384e-05	1.64325e-06	up	4.18932	4.18932	2.06672	22	18	Digestive System Development and Function, Embryonic Development, Organismal Development
12	Cdk										22	18	Digestive System Development and Function, Embryonic Development, Organismal Development
12	CHST1	carbohydrate sulfotransferase 1	Cytoplasm	enzyme	0.00110681	0.000717112	up	3.40019	3.40019	1.76562	22	18	Digestive System Development and Function, Embryonic Development, Organismal Development
12	CXCL2	C-X-C motif chemokine ligand 2	Extracellular Space	cytokine	7.29755e-05	3.81133e-06	up	2.98142	2.98142	1.576	22	18	Digestive System Development and Function, Embryonic Development, Organismal Development
12	Cyclin A										22	18	Digestive System Development and Function, Embryonic Development, Organismal Development
12	Cyclin D										22	18	Digestive System Development and Function, Embryonic Development, Organismal Development
12	Cyclin E										22	18	Digestive System Development and Function, Embryonic Development, Organismal Development
12	DNA-methyltransferase										22	18	Digestive System Development and Function, Embryonic Development, Organismal Development
12	E2f										22	18	Digestive System Development and Function, Embryonic Development, Organismal Development
12	EID1	EP300 interacting inhibitor of differentiation 1	Nucleus	transcription regulator	6.05334e-05	2.01676e-06	down	3.33862	-3.33862	-1.73925	22	18	Digestive System Development and Function, Embryonic Development, Organismal Development
12	FAM127C	family with sequence similarity 127 member C	Other	other	0.000411066	0.000136678	down	2.61003	-2.61003	-1.38407	22	18	Digestive System Development and Function, Embryonic Development, Organismal Development
12	FBXO21	F-box protein 21	Extracellular Space	enzyme	5.7214e-05	1.69199e-06	down	2.2189	-2.2189	-1.14985	22	18	Digestive System Development and Function, Embryonic Development, Organismal Development
12	Hdac										22	18	Digestive System Development and Function, Embryonic Development, Organismal Development
12	HISTONE										22	18	Digestive System Development and Function, Embryonic Development, Organismal Development
12	HOXA13	homeobox A13	Nucleus	transcription regulator	0.000455334	0.000163773	down	2.37492	-2.37492	-1.24788	22	18	Digestive System Development and Function, Embryonic Development, Organismal Development
12	JARID2	jumonji and AT-rich interaction domain containing 2	Nucleus	transcription regulator	0.000292993	7.42951e-05	up	2.01143	2.01143	1.00822	22	18	Digestive System Development and Function, Embryonic Development, Organismal Development
12	KLF4	Kruppel-like factor 4 (gut)	Nucleus	transcription regulator	8.10095e-05	5.36545e-06	up	3.086	3.086	1.62574	22	18	Digestive System Development and Function, Embryonic Development, Organismal Development
12	MTPN	myotrophin	Nucleus	transcription regulator	0.000241371	4.95333e-05	down	2.30585	-2.30585	-1.2053	22	18	Digestive System Development and Function, Embryonic Development, Organismal Development
12	PP1 protein complex group										22	18	Digestive System Development and Function, Embryonic Development, Organismal Development
12	PP1-C										22	18	Digestive System Development and Function, Embryonic Development, Organismal Development
12	PPIF	peptidylprolyl isomerase F	Cytoplasm	enzyme	0.000117299	1.19067e-05	up	2.2634	2.2634	1.17849	22	18	Digestive System Development and Function, Embryonic Development, Organismal Development
12	PPP1R9A	protein phosphatase 1 regulatory subunit 9A	Plasma Membrane	other	4.38315e-05	5.85554e-07	down	2.17687	-2.17687	-1.12225	22	18	Digestive System Development and Function, Embryonic Development, Organismal Development
12	Rb										22	18	Digestive System Development and Function, Embryonic Development, Organismal Development
12	RCOR1	REST corepressor 1	Nucleus	transcription regulator	0.000130721	1.51497e-05	down	2.5425	-2.5425	-1.34625	22	18	Digestive System Development and Function, Embryonic Development, Organismal Development
12	SLC7A11	solute carrier family 7 member 11	Plasma Membrane	transporter	7.00793e-05	3.12327e-06	up	2.30715	2.30715	1.20611	22	18	Digestive System Development and Function, Embryonic Development, Organismal Development
12	SLCO4A1	solute carrier organic anion transporter family member 4A1	Plasma Membrane	transporter	7.83021e-05	4.54106e-06	up	2.03149	2.03149	1.02254	22	18	Digestive System Development and Function, Embryonic Development, Organismal Development
12	Wnt										22	18	Digestive System Development and Function, Embryonic Development, Organismal Development
12	WNT5A	Wnt family member 5A	Extracellular Space	cytokine	9.09658e-05	6.84293e-06	up	3.07702	3.07702	1.62154	22	18	Digestive System Development and Function, Embryonic Development, Organismal Development
13	ADGRE5										22	17	Molecular Transport, Cellular Function and Maintenance, Small Molecule Biochemistry
13	COL15A1										22	17	Molecular Transport, Cellular Function and Maintenance, Small Molecule Biochemistry
13	COX15										22	17	Molecular Transport, Cellular Function and Maintenance, Small Molecule Biochemistry
13	CTDSPL	CTD small phosphatase like	Nucleus	other	0.000665895	0.000318958	down	2.13468	-2.13468	-1.09402	22	17	Molecular Transport, Cellular Function and Maintenance, Small Molecule Biochemistry
13	DUSP3										22	17	Molecular Transport, Cellular Function and Maintenance, Small Molecule Biochemistry
13	ELAVL1										22	17	Molecular Transport, Cellular Function and Maintenance, Small Molecule Biochemistry
13	ERLIN2	ER lipid raft associated 2	Plasma Membrane	kinase	0.000429686	0.000147935	down	3.83597	-3.83597	-1.93959	22	17	Molecular Transport, Cellular Function and Maintenance, Small Molecule Biochemistry
13	FAM46C	family with sequence similarity 46 member C	Extracellular Space	other	0.000426629	0.00014609	up	2.06534	2.06534	1.04638	22	17	Molecular Transport, Cellular Function and Maintenance, Small Molecule Biochemistry
13	FKBP14										22	17	Molecular Transport, Cellular Function and Maintenance, Small Molecule Biochemistry
13	FLVCR1										22	17	Molecular Transport, Cellular Function and Maintenance, Small Molecule Biochemistry
13	FZD6										22	17	Molecular Transport, Cellular Function and Maintenance, Small Molecule Biochemistry
13	GLYR1	glyoxylate reductase 1 homolog	Other	other	0.000114331	1.13183e-05	up	2.44655	2.44655	1.29075	22	17	Molecular Transport, Cellular Function and Maintenance, Small Molecule Biochemistry
13	GPR107	G protein-coupled receptor 107	Plasma Membrane	G-protein coupled receptor	5.71384e-05	1.65376e-06	down	2.29106	-2.29106	-1.19602	22	17	Molecular Transport, Cellular Function and Maintenance, Small Molecule Biochemistry
13	GPR180	G protein-coupled receptor 180	Cytoplasm	other	4.38315e-05	5.30485e-07	up	2.01282	2.01282	1.00922	22	17	Molecular Transport, Cellular Function and Maintenance, Small Molecule Biochemistry
13	GPR89A/GPR89B										22	17	Molecular Transport, Cellular Function and Maintenance, Small Molecule Biochemistry
13	LIN7C	lin-7 homolog C, crumbs cell polarity complex component	Cytoplasm	other	7.88016e-05	4.73871e-06	down	2.48142	-2.48142	-1.31117	22	17	Molecular Transport, Cellular Function and Maintenance, Small Molecule Biochemistry
13	MOSPD2										22	17	Molecular Transport, Cellular Function and Maintenance, Small Molecule Biochemistry
13	PAPLN	papilin, proteoglycan-like sulfated glycoprotein	Extracellular Space	other	7.83021e-05	4.54008e-06	down	2.45871	-2.45871	-1.2979	22	17	Molecular Transport, Cellular Function and Maintenance, Small Molecule Biochemistry
13	PCMTD1	protein-L-isoaspartate (D-aspartate) O-methyltransferase domain containing 1	Cytoplasm	enzyme	0.000195001	3.35762e-05	down	2.71614	-2.71614	-1.44156	22	17	Molecular Transport, Cellular Function and Maintenance, Small Molecule Biochemistry
13	PM20D2	peptidase M20 domain containing 2	Nucleus	other	0.000337477	9.70662e-05	down	2.14672	-2.14672	-1.10213	22	17	Molecular Transport, Cellular Function and Maintenance, Small Molecule Biochemistry
13	PRPS2	phosphoribosyl pyrophosphate synthetase 2	Cytoplasm	kinase	3.20466e-05	1.13433e-07	down	2.49178	-2.49178	-1.31718	22	17	Molecular Transport, Cellular Function and Maintenance, Small Molecule Biochemistry
13	PXDC1										22	17	Molecular Transport, Cellular Function and Maintenance, Small Molecule Biochemistry
13	SFXN1	sideroflexin 1	Cytoplasm	transporter	0.00010603	9.49495e-06	down	2.82353	-2.82353	-1.4975	22	17	Molecular Transport, Cellular Function and Maintenance, Small Molecule Biochemistry
13	SFXN4										22	17	Molecular Transport, Cellular Function and Maintenance, Small Molecule Biochemistry
13	SLC30A5										22	17	Molecular Transport, Cellular Function and Maintenance, Small Molecule Biochemistry
13	SLC39A14										22	17	Molecular Transport, Cellular Function and Maintenance, Small Molecule Biochemistry
13	SLCO4C1	solute carrier organic anion transporter family member 4C1	Plasma Membrane	transporter	0.00029133	7.32805e-05	down	2.56709	-2.56709	-1.36013	22	17	Molecular Transport, Cellular Function and Maintenance, Small Molecule Biochemistry
13	TFAP2C										22	17	Molecular Transport, Cellular Function and Maintenance, Small Molecule Biochemistry
13	TMEM2										22	17	Molecular Transport, Cellular Function and Maintenance, Small Molecule Biochemistry
13	TMEM17										22	17	Molecular Transport, Cellular Function and Maintenance, Small Molecule Biochemistry
13	TMEM65	transmembrane protein 65	Cytoplasm	other	4.85023e-05	8.70151e-07	down	2.96159	-2.96159	-1.56637	22	17	Molecular Transport, Cellular Function and Maintenance, Small Molecule Biochemistry
13	TMTC4	transmembrane and tetratricopeptide repeat containing 4	Other	other	0.00271903	0.00225582	down	2.49012	-2.49012	-1.31622	22	17	Molecular Transport, Cellular Function and Maintenance, Small Molecule Biochemistry
13	VEZT										22	17	Molecular Transport, Cellular Function and Maintenance, Small Molecule Biochemistry
13	ZNF362	zinc finger protein 362	Other	other	0.00037581	0.000117146	down	2.33043	-2.33043	-1.2206	22	17	Molecular Transport, Cellular Function and Maintenance, Small Molecule Biochemistry
13	ZNF395	zinc finger protein 395	Cytoplasm	other	0.000278723	6.71603e-05	down	2.04394	-2.04394	-1.03135	22	17	Molecular Transport, Cellular Function and Maintenance, Small Molecule Biochemistry
14	ABCC5										22	17	Organ Morphology, Cancer, Endocrine System Disorders
14	ABHD2	abhydrolase domain containing 2	Other	enzyme	4.9534e-05	1.01467e-06	down	2.64079	-2.64079	-1.40097	22	17	Organ Morphology, Cancer, Endocrine System Disorders
14	ACTN3										22	17	Organ Morphology, Cancer, Endocrine System Disorders
14	BRCA1										22	17	Organ Morphology, Cancer, Endocrine System Disorders
14	BRINP1	BMP/retinoic acid inducible neural specific 1	Nucleus	peptidase	0.000163502	2.30561e-05	down	2.51468	-2.51468	-1.33037	22	17	Organ Morphology, Cancer, Endocrine System Disorders
14	CDCA2										22	17	Organ Morphology, Cancer, Endocrine System Disorders
14	COPE										22	17	Organ Morphology, Cancer, Endocrine System Disorders
14	COTL1										22	17	Organ Morphology, Cancer, Endocrine System Disorders
14	DAGLB										22	17	Organ Morphology, Cancer, Endocrine System Disorders
14	DNTTIP1										22	17	Organ Morphology, Cancer, Endocrine System Disorders
14	DUT	deoxyuridine triphosphatase	Nucleus	enzyme	0.000180774	2.89799e-05	down	3.33942	-3.33942	-1.7396	22	17	Organ Morphology, Cancer, Endocrine System Disorders
14	ELFN2	extracellular leucine-rich repeat and fibronectin type III domain containing 2	Extracellular Space	other	0.000140191	1.74934e-05	down	2.72619	-2.72619	-1.44688	22	17	Organ Morphology, Cancer, Endocrine System Disorders
14	ESR1										22	17	Organ Morphology, Cancer, Endocrine System Disorders
14	FAT4	FAT atypical cadherin 4	Cytoplasm	other	0.000140996	1.76768e-05	down	2.05447	-2.05447	-1.03877	22	17	Organ Morphology, Cancer, Endocrine System Disorders
14	FRMD4B	FERM domain containing 4B	Cytoplasm	other	0.000404908	0.000132735	down	2.08261	-2.08261	-1.05839	22	17	Organ Morphology, Cancer, Endocrine System Disorders
14	GOLGA8DP	golgin A8 family member D, pseudogene	Other	other	9.63123e-05	7.76393e-06	up	3.5817	3.5817	1.84064	22	17	Organ Morphology, Cancer, Endocrine System Disorders
14	HIST1H2AE										22	17	Organ Morphology, Cancer, Endocrine System Disorders
14	HMGA2	high mobility group AT-hook 2	Nucleus	enzyme	7.36928e-05	3.96405e-06	up	2.57121	2.57121	1.36245	22	17	Organ Morphology, Cancer, Endocrine System Disorders
14	KCNK6	potassium two pore domain channel subfamily K member 6	Plasma Membrane	ion channel	0.000140929	1.76201e-05	up	2.00551	2.00551	1.00397	22	17	Organ Morphology, Cancer, Endocrine System Disorders
14	LRIF1	ligand dependent nuclear receptor interacting factor 1	Nucleus	other	8.10095e-05	5.33863e-06	up	2.00533	2.00533	1.00384	22	17	Organ Morphology, Cancer, Endocrine System Disorders
14	MAP3K7CL	MAP3K7 C-terminal like	Other	other	0.000389921	0.000124438	down	2.40998	-2.40998	-1.26902	22	17	Organ Morphology, Cancer, Endocrine System Disorders
14	MARCH4	membrane associated ring-CH-type finger 4	Cytoplasm	enzyme	0.00022863	4.45095e-05	up	2.33852	2.33852	1.22559	22	17	Organ Morphology, Cancer, Endocrine System Disorders
14	NUDT14										22	17	Organ Morphology, Cancer, Endocrine System Disorders
14	OTUB2	OTU deubiquitinase, ubiquitin aldehyde binding 2	Nucleus	enzyme	0.000260041	5.80771e-05	up	2.71453	2.71453	1.4407	22	17	Organ Morphology, Cancer, Endocrine System Disorders
14	PISD	phosphatidylserine decarboxylase	Cytoplasm	enzyme	0.000441987	0.000154771	down	2.04948	-2.04948	-1.03525	22	17	Organ Morphology, Cancer, Endocrine System Disorders
14	PPP1CA										22	17	Organ Morphology, Cancer, Endocrine System Disorders
14	PPP2R5C										22	17	Organ Morphology, Cancer, Endocrine System Disorders
14	RAPGEF6										22	17	Organ Morphology, Cancer, Endocrine System Disorders
14	REL										22	17	Organ Morphology, Cancer, Endocrine System Disorders
14	SAMD11	sterile alpha motif domain containing 11	Nucleus	other	0.000120639	1.27278e-05	down	2.07691	-2.07691	-1.05444	22	17	Organ Morphology, Cancer, Endocrine System Disorders
14	SHMT2										22	17	Organ Morphology, Cancer, Endocrine System Disorders
14	SLC39A13	solute carrier family 39 member 13	Cytoplasm	transporter	9.09658e-05	6.86554e-06	up	2.05211	2.05211	1.03711	22	17	Organ Morphology, Cancer, Endocrine System Disorders
14	TNFRSF10A										22	17	Organ Morphology, Cancer, Endocrine System Disorders
14	ZBTB8OS	zinc finger and BTB domain containing 8 opposite strand	Cytoplasm	other	8.30816e-05	5.60194e-06	down	2.6253	-2.6253	-1.39248	22	17	Organ Morphology, Cancer, Endocrine System Disorders
14	ZNF544										22	17	Organ Morphology, Cancer, Endocrine System Disorders
15	ACKR1										20	16	Cellular Development, Tissue Morphology, Cellular Growth and Proliferation
15	ACTR3C	ARP3 actin-related protein 3 homolog C	Cytoplasm	other	0.000414328	0.000138945	down	2.0889	-2.0889	-1.06274	20	16	Cellular Development, Tissue Morphology, Cellular Growth and Proliferation
15	ADORA2B	adenosine A2b receptor	Plasma Membrane	G-protein coupled receptor	0.000155574	2.11387e-05	up	2.26916	2.26916	1.18216	20	16	Cellular Development, Tissue Morphology, Cellular Growth and Proliferation
15	ANXA8/ANXA8L1	annexin A8-like 1	Plasma Membrane	other	0.00121248	0.0008211	up	2.6304	2.6304	1.39528	20	16	Cellular Development, Tissue Morphology, Cellular Growth and Proliferation
15	BBOF1	basal body orientation factor 1	Other	other	0.000201373	3.54553e-05	up	2.30701	2.30701	1.20602	20	16	Cellular Development, Tissue Morphology, Cellular Growth and Proliferation
15	BDKRB1										20	16	Cellular Development, Tissue Morphology, Cellular Growth and Proliferation
15	C21orf91	chromosome 21 open reading frame 91	Other	other	0.000193866	3.32924e-05	down	2.06976	-2.06976	-1.04946	20	16	Cellular Development, Tissue Morphology, Cellular Growth and Proliferation
15	CCDC85B	coiled-coil domain containing 85B	Cytoplasm	other	0.000114195	1.11352e-05	down	2.24285	-2.24285	-1.16533	20	16	Cellular Development, Tissue Morphology, Cellular Growth and Proliferation
15	CCRL2	C-C motif chemokine receptor like 2	Plasma Membrane	G-protein coupled receptor	0.000666537	0.000320999	up	2.14323	2.14323	1.09978	20	16	Cellular Development, Tissue Morphology, Cellular Growth and Proliferation
15	CELSR2										20	16	Cellular Development, Tissue Morphology, Cellular Growth and Proliferation
15	CXCR6										20	16	Cellular Development, Tissue Morphology, Cellular Growth and Proliferation
15	FGF6										20	16	Cellular Development, Tissue Morphology, Cellular Growth and Proliferation
15	GDPD5	glycerophosphodiester phosphodiesterase domain containing 5	Plasma Membrane	enzyme	0.000159281	2.19152e-05	up	3.12873	3.12873	1.64558	20	16	Cellular Development, Tissue Morphology, Cellular Growth and Proliferation
15	GPR146										20	16	Cellular Development, Tissue Morphology, Cellular Growth and Proliferation
15	GPRC5A	G protein-coupled receptor class C group 5 member A	Plasma Membrane	G-protein coupled receptor	0.000429686	0.000148011	down	2.68292	-2.68292	-1.4238	20	16	Cellular Development, Tissue Morphology, Cellular Growth and Proliferation
15	GPRC5B										20	16	Cellular Development, Tissue Morphology, Cellular Growth and Proliferation
15	HIC1										20	16	Cellular Development, Tissue Morphology, Cellular Growth and Proliferation
15	HTR2B										20	16	Cellular Development, Tissue Morphology, Cellular Growth and Proliferation
15	KRAS										20	16	Cellular Development, Tissue Morphology, Cellular Growth and Proliferation
15	mir-21										20	16	Cellular Development, Tissue Morphology, Cellular Growth and Proliferation
15	MTRR	5-methyltetrahydrofolate-homocysteine methyltransferase reductase	Cytoplasm	enzyme	0.000185215	3.03475e-05	down	2.31122	-2.31122	-1.20866	20	16	Cellular Development, Tissue Morphology, Cellular Growth and Proliferation
15	MZT1	mitotic spindle organizing protein 1	Cytoplasm	other	4.25833e-05	4.91084e-07	up	2.57274	2.57274	1.3633	20	16	Cellular Development, Tissue Morphology, Cellular Growth and Proliferation
15	OBFC1										20	16	Cellular Development, Tissue Morphology, Cellular Growth and Proliferation
15	P2RY1										20	16	Cellular Development, Tissue Morphology, Cellular Growth and Proliferation
15	P2RY6										20	16	Cellular Development, Tissue Morphology, Cellular Growth and Proliferation
15	PER3	period circadian clock 3	Nucleus	other	4.21674e-05	4.22784e-07	down	2.73607	-2.73607	-1.45211	20	16	Cellular Development, Tissue Morphology, Cellular Growth and Proliferation
15	PTGR2	prostaglandin reductase 2	Cytoplasm	enzyme	0.000201811	3.56014e-05	down	2.37036	-2.37036	-1.2451	20	16	Cellular Development, Tissue Morphology, Cellular Growth and Proliferation
15	S1PR1	sphingosine-1-phosphate receptor 1	Plasma Membrane	G-protein coupled receptor	1.48349e-06	3.38774e-10	down	7.79723	-7.79723	-2.96296	20	16	Cellular Development, Tissue Morphology, Cellular Growth and Proliferation
15	S1PR2										20	16	Cellular Development, Tissue Morphology, Cellular Growth and Proliferation
15	S1PR3										20	16	Cellular Development, Tissue Morphology, Cellular Growth and Proliferation
15	S1PR4										20	16	Cellular Development, Tissue Morphology, Cellular Growth and Proliferation
15	SLC52A2										20	16	Cellular Development, Tissue Morphology, Cellular Growth and Proliferation
15	TERF1	telomeric repeat binding factor 1	Nucleus	other	8.51936e-05	5.98124e-06	down	2.0612	-2.0612	-1.04349	20	16	Cellular Development, Tissue Morphology, Cellular Growth and Proliferation
15	TGFB1										20	16	Cellular Development, Tissue Morphology, Cellular Growth and Proliferation
15	ZNF165	zinc finger protein 165	Nucleus	transcription regulator	0.000375918	0.000117288	up	2.54252	2.54252	1.34626	20	16	Cellular Development, Tissue Morphology, Cellular Growth and Proliferation
16	ADSS	adenylosuccinate synthase	Cytoplasm	enzyme	9.31449e-05	7.37034e-06	down	3.2606	-3.2606	-1.70514	19	16	Cell Cycle, Cellular Assembly and Organization, Hereditary Disorder
16	ADTRP	androgen dependent TFPI regulating protein	Plasma Membrane	other	0.000111196	1.06142e-05	up	3.08899	3.08899	1.62714	19	16	Cell Cycle, Cellular Assembly and Organization, Hereditary Disorder
16	AFF3	AF4/FMR2 family member 3	Nucleus	transcription regulator	6.68109e-05	2.70307e-06	up	2.08376	2.08376	1.05919	19	16	Cell Cycle, Cellular Assembly and Organization, Hereditary Disorder
16	BRIP1										19	16	Cell Cycle, Cellular Assembly and Organization, Hereditary Disorder
16	C12orf49	chromosome 12 open reading frame 49	Other	other	0.00185274	0.00142535	down	2.02152	-2.02152	-1.01544	19	16	Cell Cycle, Cellular Assembly and Organization, Hereditary Disorder
16	CCL16										19	16	Cell Cycle, Cellular Assembly and Organization, Hereditary Disorder
16	CHST9	carbohydrate sulfotransferase 9	Cytoplasm	enzyme	0.000109102	1.01652e-05	down	3.82965	-3.82965	-1.93721	19	16	Cell Cycle, Cellular Assembly and Organization, Hereditary Disorder
16	DEPDC1										19	16	Cell Cycle, Cellular Assembly and Organization, Hereditary Disorder
16	dihydrotestosterone										19	16	Cell Cycle, Cellular Assembly and Organization, Hereditary Disorder
16	ELSPBP1										19	16	Cell Cycle, Cellular Assembly and Organization, Hereditary Disorder
16	FAM160A2										19	16	Cell Cycle, Cellular Assembly and Organization, Hereditary Disorder
16	FAM86C1										19	16	Cell Cycle, Cellular Assembly and Organization, Hereditary Disorder
16	FOXO1										19	16	Cell Cycle, Cellular Assembly and Organization, Hereditary Disorder
16	G0S2	G0/G1 switch 2	Cytoplasm	other	4.86622e-05	8.94566e-07	up	2.78473	2.78473	1.47754	19	16	Cell Cycle, Cellular Assembly and Organization, Hereditary Disorder
16	GPR20										19	16	Cell Cycle, Cellular Assembly and Organization, Hereditary Disorder
16	HNF4A										19	16	Cell Cycle, Cellular Assembly and Organization, Hereditary Disorder
16	HOOK3	hook microtubule-tethering protein 3	Cytoplasm	other	0.000454525	0.000163324	down	2.02663	-2.02663	-1.01908	19	16	Cell Cycle, Cellular Assembly and Organization, Hereditary Disorder
16	HPD										19	16	Cell Cycle, Cellular Assembly and Organization, Hereditary Disorder
16	LSM5	LSM5 homolog, U6 small nuclear RNA and mRNA degradation associated	Cytoplasm	other	4.38315e-05	5.51746e-07	down	2.88024	-2.88024	-1.52619	19	16	Cell Cycle, Cellular Assembly and Organization, Hereditary Disorder
16	ME1	malic enzyme 1	Cytoplasm	enzyme	8.46898e-05	5.81387e-06	down	2.50435	-2.50435	-1.32443	19	16	Cell Cycle, Cellular Assembly and Organization, Hereditary Disorder
16	MXI1	MAX interactor 1, dimerization protein	Nucleus	transcription regulator	0.000287699	7.17973e-05	down	3.20286	-3.20286	-1.67936	19	16	Cell Cycle, Cellular Assembly and Organization, Hereditary Disorder
16	NCF1C										19	16	Cell Cycle, Cellular Assembly and Organization, Hereditary Disorder
16	NFYA	nuclear transcription factor Y subunit alpha	Nucleus	transcription regulator	0.000230974	4.52045e-05	down	2.1825	-2.1825	-1.12598	19	16	Cell Cycle, Cellular Assembly and Organization, Hereditary Disorder
16	PEX13	peroxisomal biogenesis factor 13	Cytoplasm	transporter	7.25781e-05	3.65497e-06	down	2.32362	-2.32362	-1.21637	19	16	Cell Cycle, Cellular Assembly and Organization, Hereditary Disorder
16	PRPF38B										19	16	Cell Cycle, Cellular Assembly and Organization, Hereditary Disorder
16	SBNO2										19	16	Cell Cycle, Cellular Assembly and Organization, Hereditary Disorder
16	SFSWAP										19	16	Cell Cycle, Cellular Assembly and Organization, Hereditary Disorder
16	SLC1A4										19	16	Cell Cycle, Cellular Assembly and Organization, Hereditary Disorder
16	SLC25A40	solute carrier family 25 member 40	Cytoplasm	other	8.78863e-05	6.3923e-06	down	2.0186	-2.0186	-1.01335	19	16	Cell Cycle, Cellular Assembly and Organization, Hereditary Disorder
16	TAL1										19	16	Cell Cycle, Cellular Assembly and Organization, Hereditary Disorder
16	TMEM156	transmembrane protein 156	Other	other	0.000371105	0.000114959	up	7.23848	7.23848	2.85569	19	16	Cell Cycle, Cellular Assembly and Organization, Hereditary Disorder
16	TOX										19	16	Cell Cycle, Cellular Assembly and Organization, Hereditary Disorder
16	TRIM55	tripartite motif containing 55	Cytoplasm	other	0.000238078	4.79528e-05	up	2.50066	2.50066	1.32231	19	16	Cell Cycle, Cellular Assembly and Organization, Hereditary Disorder
16	ZC3H10										19	16	Cell Cycle, Cellular Assembly and Organization, Hereditary Disorder
16	ZNRD1	zinc ribbon domain containing 1	Nucleus	transcription regulator	0.00025278	5.48138e-05	down	2.60434	-2.60434	-1.38092	19	16	Cell Cycle, Cellular Assembly and Organization, Hereditary Disorder
17	ABCB7										19	16	Hereditary Disorder, Ophthalmic Disease, Organismal Injury and Abnormalities
17	ABCB10										19	16	Hereditary Disorder, Ophthalmic Disease, Organismal Injury and Abnormalities
17	AGO4										19	16	Hereditary Disorder, Ophthalmic Disease, Organismal Injury and Abnormalities
17	APP										19	16	Hereditary Disorder, Ophthalmic Disease, Organismal Injury and Abnormalities
17	CPOX										19	16	Hereditary Disorder, Ophthalmic Disease, Organismal Injury and Abnormalities
17	DGUOK										19	16	Hereditary Disorder, Ophthalmic Disease, Organismal Injury and Abnormalities
17	ENTPD7	ectonucleoside triphosphate diphosphohydrolase 7	Cytoplasm	enzyme	7.29755e-05	3.76723e-06	up	2.43567	2.43567	1.28432	19	16	Hereditary Disorder, Ophthalmic Disease, Organismal Injury and Abnormalities
17	FBXO2										19	16	Hereditary Disorder, Ophthalmic Disease, Organismal Injury and Abnormalities
17	FECH										19	16	Hereditary Disorder, Ophthalmic Disease, Organismal Injury and Abnormalities
17	FZD4										19	16	Hereditary Disorder, Ophthalmic Disease, Organismal Injury and Abnormalities
17	GGA2										19	16	Hereditary Disorder, Ophthalmic Disease, Organismal Injury and Abnormalities
17	GGA3										19	16	Hereditary Disorder, Ophthalmic Disease, Organismal Injury and Abnormalities
17	GLRX5	glutaredoxin 5	Cytoplasm	other	8.02025e-05	5.01026e-06	down	2.47387	-2.47387	-1.30677	19	16	Hereditary Disorder, Ophthalmic Disease, Organismal Injury and Abnormalities
17	GSAP	gamma-secretase activating protein	Cytoplasm	peptidase	0.000666537	0.000319519	up	2.03345	2.03345	1.02393	19	16	Hereditary Disorder, Ophthalmic Disease, Organismal Injury and Abnormalities
17	JTB	jumping translocation breakpoint	Plasma Membrane	other	5.1787e-05	1.17671e-06	down	2.50617	-2.50617	-1.32549	19	16	Hereditary Disorder, Ophthalmic Disease, Organismal Injury and Abnormalities
17	NDP										19	16	Hereditary Disorder, Ophthalmic Disease, Organismal Injury and Abnormalities
17	NECAP1										19	16	Hereditary Disorder, Ophthalmic Disease, Organismal Injury and Abnormalities
17	NECAP2	NECAP endocytosis associated 2	Cytoplasm	other	7.2424e-05	3.62593e-06	up	2.07938	2.07938	1.05616	19	16	Hereditary Disorder, Ophthalmic Disease, Organismal Injury and Abnormalities
17	NIM1K	NIM1 serine/threonine protein kinase	Other	kinase	0.000272572	6.43305e-05	down	2.76006	-2.76006	-1.4647	19	16	Hereditary Disorder, Ophthalmic Disease, Organismal Injury and Abnormalities
17	NTM	neurotrimin	Plasma Membrane	other	0.000170444	2.58643e-05	up	2.96833	2.96833	1.56965	19	16	Hereditary Disorder, Ophthalmic Disease, Organismal Injury and Abnormalities
17	OLFML2A	olfactomedin like 2A	Extracellular Space	other	0.000501029	0.00019349	down	2.22716	-2.22716	-1.15521	19	16	Hereditary Disorder, Ophthalmic Disease, Organismal Injury and Abnormalities
17	PPOX										19	16	Hereditary Disorder, Ophthalmic Disease, Organismal Injury and Abnormalities
17	PSENEN										19	16	Hereditary Disorder, Ophthalmic Disease, Organismal Injury and Abnormalities
17	RGS14										19	16	Hereditary Disorder, Ophthalmic Disease, Organismal Injury and Abnormalities
17	RUFY3	RUN and FYVE domain containing 3	Plasma Membrane	other	9.42406e-05	7.47856e-06	down	2.03719	-2.03719	-1.02658	19	16	Hereditary Disorder, Ophthalmic Disease, Organismal Injury and Abnormalities
17	SLAMF8	SLAM family member 8	Extracellular Space	other	7.88016e-05	4.7411e-06	up	3.16658	3.16658	1.66293	19	16	Hereditary Disorder, Ophthalmic Disease, Organismal Injury and Abnormalities
17	SLC17A5	solute carrier family 17 member 5	Plasma Membrane	transporter	8.493e-05	5.90056e-06	up	2.78165	2.78165	1.47594	19	16	Hereditary Disorder, Ophthalmic Disease, Organismal Injury and Abnormalities
17	SUCLA2	succinate-CoA ligase ADP-forming beta subunit	Cytoplasm	enzyme	0.00010603	9.53441e-06	down	3.90407	-3.90407	-1.96498	19	16	Hereditary Disorder, Ophthalmic Disease, Organismal Injury and Abnormalities
17	SUCLG1										19	16	Hereditary Disorder, Ophthalmic Disease, Organismal Injury and Abnormalities
17	TCP11L1	t-complex 11 like 1	Cytoplasm	other	0.000451669	0.00016173	up	2.04888	2.04888	1.03483	19	16	Hereditary Disorder, Ophthalmic Disease, Organismal Injury and Abnormalities
17	TOMM5	translocase of outer mitochondrial membrane 5	Cytoplasm	other	3.0027e-05	8.14067e-08	down	3.598	-3.598	-1.84719	19	16	Hereditary Disorder, Ophthalmic Disease, Organismal Injury and Abnormalities
17	TSPAN12	tetraspanin 12	Plasma Membrane	other	0.000254085	5.55272e-05	down	2.6916	-2.6916	-1.42846	19	16	Hereditary Disorder, Ophthalmic Disease, Organismal Injury and Abnormalities
17	UBE2S										19	16	Hereditary Disorder, Ophthalmic Disease, Organismal Injury and Abnormalities
17	VWA5A	von Willebrand factor A domain containing 5A	Nucleus	other	0.000280012	6.82183e-05	down	2.11349	-2.11349	-1.07963	19	16	Hereditary Disorder, Ophthalmic Disease, Organismal Injury and Abnormalities
17	ZXDC										19	16	Hereditary Disorder, Ophthalmic Disease, Organismal Injury and Abnormalities
18	ACKR3	atypical chemokine receptor 3	Plasma Membrane	G-protein coupled receptor	0.00018251	2.96362e-05	up	2.02777	2.02777	1.0199	18	16	Cardiovascular Disease, Organismal Injury and Abnormalities, Embryonic Development
18	AKT1										18	16	Cardiovascular Disease, Organismal Injury and Abnormalities, Embryonic Development
18	B3GNT7	UDP-GlcNAc:betaGal beta-1,3-N-acetylglucosaminyltransferase 7	Cytoplasm	enzyme	7.2018e-05	3.47838e-06	up	2.03894	2.03894	1.02782	18	16	Cardiovascular Disease, Organismal Injury and Abnormalities, Embryonic Development
18	Beta Arrestin										18	16	Cardiovascular Disease, Organismal Injury and Abnormalities, Embryonic Development
18	BMF										18	16	Cardiovascular Disease, Organismal Injury and Abnormalities, Embryonic Development
18	BMP7										18	16	Cardiovascular Disease, Organismal Injury and Abnormalities, Embryonic Development
18	CGNL1	cingulin-like 1	Plasma Membrane	other	0.000368078	0.000112837	down	2.00997	-2.00997	-1.00717	18	16	Cardiovascular Disease, Organismal Injury and Abnormalities, Embryonic Development
18	CTHRC1										18	16	Cardiovascular Disease, Organismal Injury and Abnormalities, Embryonic Development
18	CTNNB1										18	16	Cardiovascular Disease, Organismal Injury and Abnormalities, Embryonic Development
18	DYNLL1										18	16	Cardiovascular Disease, Organismal Injury and Abnormalities, Embryonic Development
18	ELMOD2	ELMO domain containing 2	Other	other	0.0002917	7.34608e-05	down	2.42455	-2.42455	-1.27771	18	16	Cardiovascular Disease, Organismal Injury and Abnormalities, Embryonic Development
18	EMP1	epithelial membrane protein 1	Plasma Membrane	other	7.2018e-05	3.47547e-06	up	3.52521	3.52521	1.81771	18	16	Cardiovascular Disease, Organismal Injury and Abnormalities, Embryonic Development
18	EPSTI1	epithelial stromal interaction 1 (breast)	Other	other	0.00032133	8.9064e-05	up	2.52469	2.52469	1.3361	18	16	Cardiovascular Disease, Organismal Injury and Abnormalities, Embryonic Development
18	FGF20										18	16	Cardiovascular Disease, Organismal Injury and Abnormalities, Embryonic Development
18	FOXP1										18	16	Cardiovascular Disease, Organismal Injury and Abnormalities, Embryonic Development
18	FZD8	frizzled class receptor 8	Plasma Membrane	G-protein coupled receptor	0.000607384	0.000270472	up	2.43015	2.43015	1.28104	18	16	Cardiovascular Disease, Organismal Injury and Abnormalities, Embryonic Development
18	GDF3										18	16	Cardiovascular Disease, Organismal Injury and Abnormalities, Embryonic Development
18	GLCCI1	glucocorticoid induced 1	Cytoplasm	other	0.00050518	0.000196523	down	3.11434	-3.11434	-1.63893	18	16	Cardiovascular Disease, Organismal Injury and Abnormalities, Embryonic Development
18	GLIPR1										18	16	Cardiovascular Disease, Organismal Injury and Abnormalities, Embryonic Development
18	GPRIN3	GPRIN family member 3	Other	other	0.00115369	0.000763098	down	2.56257	-2.56257	-1.35759	18	16	Cardiovascular Disease, Organismal Injury and Abnormalities, Embryonic Development
18	KISS1R										18	16	Cardiovascular Disease, Organismal Injury and Abnormalities, Embryonic Development
18	LACC1	laccase domain containing 1	Other	other	0.000114459	1.1357e-05	up	3.07939	3.07939	1.62265	18	16	Cardiovascular Disease, Organismal Injury and Abnormalities, Embryonic Development
18	LTB4R2										18	16	Cardiovascular Disease, Organismal Injury and Abnormalities, Embryonic Development
18	MT1L										18	16	Cardiovascular Disease, Organismal Injury and Abnormalities, Embryonic Development
18	MTA1										18	16	Cardiovascular Disease, Organismal Injury and Abnormalities, Embryonic Development
18	NHSL1	NHS like 1	Other	other	0.000111733	1.06911e-05	up	2.1702	2.1702	1.11783	18	16	Cardiovascular Disease, Organismal Injury and Abnormalities, Embryonic Development
18	NR3C1										18	16	Cardiovascular Disease, Organismal Injury and Abnormalities, Embryonic Development
18	PALM2	paralemmin 2	Plasma Membrane	other	0.000247298	5.21815e-05	up	2.08663	2.08663	1.06117	18	16	Cardiovascular Disease, Organismal Injury and Abnormalities, Embryonic Development
18	PHLDB2	pleckstrin homology like domain family B member 2	Cytoplasm	other	0.000179082	2.82998e-05	down	2.42501	-2.42501	-1.27799	18	16	Cardiovascular Disease, Organismal Injury and Abnormalities, Embryonic Development
18	POU5F1										18	16	Cardiovascular Disease, Organismal Injury and Abnormalities, Embryonic Development
18	PPP2CA										18	16	Cardiovascular Disease, Organismal Injury and Abnormalities, Embryonic Development
18	QSER1	glutamine and serine rich 1	Other	other	0.000106124	9.69393e-06	down	2.00397	-2.00397	-1.00286	18	16	Cardiovascular Disease, Organismal Injury and Abnormalities, Embryonic Development
18	TNFRSF19	tumor necrosis factor receptor superfamily member 19	Plasma Membrane	transmembrane receptor	7.83021e-05	4.53929e-06	down	3.32882	-3.32882	-1.73501	18	16	Cardiovascular Disease, Organismal Injury and Abnormalities, Embryonic Development
18	TRAC	T-cell receptor alpha constant	Plasma Membrane	other	8.53921e-05	6.00611e-06	up	4.65602	4.65602	2.2191	18	16	Cardiovascular Disease, Organismal Injury and Abnormalities, Embryonic Development
18	WNT16										18	16	Cardiovascular Disease, Organismal Injury and Abnormalities, Embryonic Development
19	1-acylglycerol-3-phosphate O-acyltransferase										18	17	Embryonic Development, Organ Development, Organismal Development
19	14-3-3										18	17	Embryonic Development, Organ Development, Organismal Development
19	ABHD5	abhydrolase domain containing 5	Cytoplasm	enzyme	0.000223981	4.29378e-05	down	2.45649	-2.45649	-1.2966	18	17	Embryonic Development, Organ Development, Organismal Development
19	AMPK										18	17	Embryonic Development, Organ Development, Organismal Development
19	caspase										18	17	Embryonic Development, Organ Development, Organismal Development
19	CNKSR3	CNKSR family member 3	Plasma Membrane	kinase	0.000104812	9.19111e-06	down	2.05759	-2.05759	-1.04095	18	17	Embryonic Development, Organ Development, Organismal Development
19	Cofilin										18	17	Embryonic Development, Organ Development, Organismal Development
19	CRLS1	cardiolipin synthase 1	Cytoplasm	enzyme	9.24278e-05	7.1639e-06	down	2.05449	-2.05449	-1.03878	18	17	Embryonic Development, Organ Development, Organismal Development
19	cytochrome C										18	17	Embryonic Development, Organ Development, Organismal Development
19	cytochrome-c oxidase										18	17	Embryonic Development, Organ Development, Organismal Development
19	FAM43A	family with sequence similarity 43 member A	Other	other	0.000259857	5.79902e-05	up	3.5897	3.5897	1.84386	18	17	Embryonic Development, Organ Development, Organismal Development
19	FBXO32	F-box protein 32	Cytoplasm	enzyme	0.000134066	1.59195e-05	up	2.08519	2.08519	1.06018	18	17	Embryonic Development, Organ Development, Organismal Development
19	HAS2	hyaluronan synthase 2	Plasma Membrane	enzyme	8.96643e-05	6.63704e-06	up	2.84304	2.84304	1.50743	18	17	Embryonic Development, Organ Development, Organismal Development
19	Hsp27										18	17	Embryonic Development, Organ Development, Organismal Development
19	ITIH5	inter-alpha-trypsin inhibitor heavy chain family member 5	Other	other	0.00218052	0.00173411	down	2.27015	-2.27015	-1.18279	18	17	Embryonic Development, Organ Development, Organismal Development
19	KCNJ16	potassium voltage-gated channel subfamily J member 16	Plasma Membrane	ion channel	6.27081e-05	2.40579e-06	down	3.12894	-3.12894	-1.64567	18	17	Embryonic Development, Organ Development, Organismal Development
19	LCLAT1	lysocardiolipin acyltransferase 1	Cytoplasm	enzyme	0.000563238	0.000238177	down	2.21825	-2.21825	-1.14942	18	17	Embryonic Development, Organ Development, Organismal Development
19	Ldh (complex)										18	17	Embryonic Development, Organ Development, Organismal Development
19	MAP2K1/2										18	17	Embryonic Development, Organ Development, Organismal Development
19	Mitochondrial complex 1										18	17	Embryonic Development, Organ Development, Organismal Development
19	Mlc										18	17	Embryonic Development, Organ Development, Organismal Development
19	Na+										18	17	Embryonic Development, Organ Development, Organismal Development
19	K+ -ATPase										18	17	Embryonic Development, Organ Development, Organismal Development
19	p70 S6k										18	17	Embryonic Development, Organ Development, Organismal Development
19	PARP										18	17	Embryonic Development, Organ Development, Organismal Development
19	PDZK1	PDZ domain containing 1	Plasma Membrane	transporter	3.59123e-05	1.64283e-07	down	4.64588	-4.64588	-2.21595	18	17	Embryonic Development, Organ Development, Organismal Development
19	Pka										18	17	Embryonic Development, Organ Development, Organismal Development
19	PP2A										18	17	Embryonic Development, Organ Development, Organismal Development
19	PPP2R1B	protein phosphatase 2 regulatory subunit A, beta	Plasma Membrane	phosphatase	0.00054298	0.000223565	down	3.20601	-3.20601	-1.68078	18	17	Embryonic Development, Organ Development, Organismal Development
19	PRDX3	peroxiredoxin 3	Cytoplasm	enzyme	3.70634e-05	2.96236e-07	down	2.10772	-2.10772	-1.07569	18	17	Embryonic Development, Organ Development, Organismal Development
19	PRKAA										18	17	Embryonic Development, Organ Development, Organismal Development
19	PRKAA1	protein kinase AMP-activated catalytic subunit alpha 1	Cytoplasm	kinase	0.00048552	0.000183941	down	2.44451	-2.44451	-1.28954	18	17	Embryonic Development, Organ Development, Organismal Development
19	SETBP1	SET binding protein 1	Nucleus	other	0.000223863	4.28658e-05	up	2.27989	2.27989	1.18897	18	17	Embryonic Development, Organ Development, Organismal Development
19	SOD2	superoxide dismutase 2, mitochondrial	Cytoplasm	enzyme	5.71384e-05	1.58904e-06	up	2.2088	2.2088	1.14326	18	17	Embryonic Development, Organ Development, Organismal Development
19	SRI	sorcin	Cytoplasm	transporter	5.67199e-05	1.5399e-06	down	3.03755	-3.03755	-1.60291	18	17	Embryonic Development, Organ Development, Organismal Development
19	STK17B	serine/threonine kinase 17b	Nucleus	kinase	7.88016e-05	4.85087e-06	up	2.06719	2.06719	1.04767	18	17	Embryonic Development, Organ Development, Organismal Development
20	ADAMTS9	ADAM metallopeptidase with thrombospondin type 1 motif 9	Extracellular Space	peptidase	0.000362797	0.000109127	up	3.03762	3.03762	1.60294	17	15	Infectious Diseases, Cell-To-Cell Signaling and Interaction, Hair and Skin Development and Function
20	ARHGAP28	Rho GTPase activating protein 28	Cytoplasm	other	0.000335854	9.62924e-05	down	3.42046	-3.42046	-1.77419	17	15	Infectious Diseases, Cell-To-Cell Signaling and Interaction, Hair and Skin Development and Function
20	BMPER	BMP binding endothelial regulator	Extracellular Space	other	0.000275311	6.53595e-05	up	4.43084	4.43084	2.14758	17	15	Infectious Diseases, Cell-To-Cell Signaling and Interaction, Hair and Skin Development and Function
20	Ciap										17	15	Infectious Diseases, Cell-To-Cell Signaling and Interaction, Hair and Skin Development and Function
20	CYLD	CYLD lysine 63 deubiquitinase	Nucleus	transcription regulator	5.67199e-05	1.53037e-06	up	2.37536	2.37536	1.24815	17	15	Infectious Diseases, Cell-To-Cell Signaling and Interaction, Hair and Skin Development and Function
20	DAP	death-associated protein	Cytoplasm	transcription regulator	0.000137712	1.67916e-05	down	2.37834	-2.37834	-1.24996	17	15	Infectious Diseases, Cell-To-Cell Signaling and Interaction, Hair and Skin Development and Function
20	DDX58	DEXD/H-box helicase 58	Cytoplasm	enzyme	7.88016e-05	4.63882e-06	up	2.39664	2.39664	1.26101	17	15	Infectious Diseases, Cell-To-Cell Signaling and Interaction, Hair and Skin Development and Function
20	ETS										17	15	Infectious Diseases, Cell-To-Cell Signaling and Interaction, Hair and Skin Development and Function
20	Fascin										17	15	Infectious Diseases, Cell-To-Cell Signaling and Interaction, Hair and Skin Development and Function
20	Ferritin										17	15	Infectious Diseases, Cell-To-Cell Signaling and Interaction, Hair and Skin Development and Function
20	G0S2	G0/G1 switch 2	Cytoplasm	other	4.86622e-05	8.94566e-07	up	2.78473	2.78473	1.47754	17	15	Infectious Diseases, Cell-To-Cell Signaling and Interaction, Hair and Skin Development and Function
20	I kappa b kinase										17	15	Infectious Diseases, Cell-To-Cell Signaling and Interaction, Hair and Skin Development and Function
20	IFIH1	interferon induced with helicase C domain 1	Nucleus	enzyme	6.05334e-05	2.0177e-06	up	2.86486	2.86486	1.51846	17	15	Infectious Diseases, Cell-To-Cell Signaling and Interaction, Hair and Skin Development and Function
20	Ikk (family)										17	15	Infectious Diseases, Cell-To-Cell Signaling and Interaction, Hair and Skin Development and Function
20	IL-1R										17	15	Infectious Diseases, Cell-To-Cell Signaling and Interaction, Hair and Skin Development and Function
20	IRAK										17	15	Infectious Diseases, Cell-To-Cell Signaling and Interaction, Hair and Skin Development and Function
20	IRF										17	15	Infectious Diseases, Cell-To-Cell Signaling and Interaction, Hair and Skin Development and Function
20	LY96	lymphocyte antigen 96	Plasma Membrane	transmembrane receptor	0.000399174	0.000129442	up	2.09875	2.09875	1.06953	17	15	Infectious Diseases, Cell-To-Cell Signaling and Interaction, Hair and Skin Development and Function
20	Lymphotoxin										17	15	Infectious Diseases, Cell-To-Cell Signaling and Interaction, Hair and Skin Development and Function
20	MAP3K										17	15	Infectious Diseases, Cell-To-Cell Signaling and Interaction, Hair and Skin Development and Function
20	MAVS	mitochondrial antiviral signaling protein	Cytoplasm	other	0.001397	0.000996787	down	2.47268	-2.47268	-1.30607	17	15	Infectious Diseases, Cell-To-Cell Signaling and Interaction, Hair and Skin Development and Function
20	NFkB (complex)										17	15	Infectious Diseases, Cell-To-Cell Signaling and Interaction, Hair and Skin Development and Function
20	NFkB (family)										17	15	Infectious Diseases, Cell-To-Cell Signaling and Interaction, Hair and Skin Development and Function
20	NfkB-RelA										17	15	Infectious Diseases, Cell-To-Cell Signaling and Interaction, Hair and Skin Development and Function
20	NfkB1-RelA										17	15	Infectious Diseases, Cell-To-Cell Signaling and Interaction, Hair and Skin Development and Function
20	NIK										17	15	Infectious Diseases, Cell-To-Cell Signaling and Interaction, Hair and Skin Development and Function
20	OTUB2	OTU deubiquitinase, ubiquitin aldehyde binding 2	Nucleus	enzyme	0.000260041	5.80771e-05	up	2.71453	2.71453	1.4407	17	15	Infectious Diseases, Cell-To-Cell Signaling and Interaction, Hair and Skin Development and Function
20	P-TEFb										17	15	Infectious Diseases, Cell-To-Cell Signaling and Interaction, Hair and Skin Development and Function
20	SCLY	selenocysteine lyase	Cytoplasm	enzyme	0.000257527	5.66631e-05	down	2.85702	-2.85702	-1.51451	17	15	Infectious Diseases, Cell-To-Cell Signaling and Interaction, Hair and Skin Development and Function
20	SLC2A12	solute carrier family 2 member 12	Plasma Membrane	transporter	0.0008161	0.00044961	down	2.19518	-2.19518	-1.13434	17	15	Infectious Diseases, Cell-To-Cell Signaling and Interaction, Hair and Skin Development and Function
20	Stat3-Stat3										17	15	Infectious Diseases, Cell-To-Cell Signaling and Interaction, Hair and Skin Development and Function
20	TNFRSF19	tumor necrosis factor receptor superfamily member 19	Plasma Membrane	transmembrane receptor	7.83021e-05	4.53929e-06	down	3.32882	-3.32882	-1.73501	17	15	Infectious Diseases, Cell-To-Cell Signaling and Interaction, Hair and Skin Development and Function
20	TRAF										17	15	Infectious Diseases, Cell-To-Cell Signaling and Interaction, Hair and Skin Development and Function
20	tryptase										17	15	Infectious Diseases, Cell-To-Cell Signaling and Interaction, Hair and Skin Development and Function
20	VIMP	VCP interacting membrane selenoprotein	Cytoplasm	other	6.20888e-05	2.31114e-06	up	2.20795	2.20795	1.14271	17	15	Infectious Diseases, Cell-To-Cell Signaling and Interaction, Hair and Skin Development and Function
21	Aconitase										17	16	Cell Signaling, Inflammatory Response, Organismal Survival
21	APC/APC2										17	16	Cell Signaling, Inflammatory Response, Organismal Survival
21	BCL2A1	BCL2 related protein A1	Cytoplasm	other	2.49541e-05	4.55887e-08	up	11.3611	11.3611	3.50603	17	16	Cell Signaling, Inflammatory Response, Organismal Survival
21	CNEP1R1	CTD nuclear envelope phosphatase 1 regulatory subunit 1	Nucleus	other	0.000171064	2.60057e-05	up	3.00631	3.00631	1.58799	17	16	Cell Signaling, Inflammatory Response, Organismal Survival
21	collagen										17	16	Cell Signaling, Inflammatory Response, Organismal Survival
21	CSF										17	16	Cell Signaling, Inflammatory Response, Organismal Survival
21	HLA-DR										17	16	Cell Signaling, Inflammatory Response, Organismal Survival
21	HMGA2	high mobility group AT-hook 2	Nucleus	enzyme	7.36928e-05	3.96405e-06	up	2.57121	2.57121	1.36245	17	16	Cell Signaling, Inflammatory Response, Organismal Survival
21	HSP										17	16	Cell Signaling, Inflammatory Response, Organismal Survival
21	HSPA9	heat shock protein family A (Hsp70) member 9	Cytoplasm	other	5.12481e-05	1.15744e-06	down	2.64295	-2.64295	-1.40215	17	16	Cell Signaling, Inflammatory Response, Organismal Survival
21	Ifn gamma										17	16	Cell Signaling, Inflammatory Response, Organismal Survival
21	Ikb										17	16	Cell Signaling, Inflammatory Response, Organismal Survival
21	IKK (complex)										17	16	Cell Signaling, Inflammatory Response, Organismal Survival
21	IL1										17	16	Cell Signaling, Inflammatory Response, Organismal Survival
21	IRAK2	interleukin 1 receptor associated kinase 2	Plasma Membrane	kinase	0.000118827	1.23196e-05	up	3.36683	3.36683	1.75139	17	16	Cell Signaling, Inflammatory Response, Organismal Survival
21	LITAF	lipopolysaccharide induced TNF factor	Nucleus	transcription regulator	5.71384e-05	1.65447e-06	down	2.76449	-2.76449	-1.46701	17	16	Cell Signaling, Inflammatory Response, Organismal Survival
21	NFKBIE	NFKB inhibitor epsilon	Nucleus	transcription regulator	7.29755e-05	3.81911e-06	up	2.23963	2.23963	1.16326	17	16	Cell Signaling, Inflammatory Response, Organismal Survival
21	NLRP3	NLR family, pyrin domain containing 3	Cytoplasm	other	0.000235207	4.68615e-05	up	3.66524	3.66524	1.87391	17	16	Cell Signaling, Inflammatory Response, Organismal Survival
21	NREP	neuronal regeneration related protein	Cytoplasm	other	3.0027e-05	9.59985e-08	down	2.03785	-2.03785	-1.02705	17	16	Cell Signaling, Inflammatory Response, Organismal Survival
21	P glycoprotein										17	16	Cell Signaling, Inflammatory Response, Organismal Survival
21	P38 MAPK										17	16	Cell Signaling, Inflammatory Response, Organismal Survival
21	PELI1	pellino E3 ubiquitin protein ligase 1	Cytoplasm	enzyme	0.00158172	0.00117464	down	2.50182	-2.50182	-1.32298	17	16	Cell Signaling, Inflammatory Response, Organismal Survival
21	Pro-inflammatory Cytokine										17	16	Cell Signaling, Inflammatory Response, Organismal Survival
21	Smad2/3										17	16	Cell Signaling, Inflammatory Response, Organismal Survival
21	Smad2/3-Smad4										17	16	Cell Signaling, Inflammatory Response, Organismal Survival
21	TAB2	TGF-beta activated kinase 1/MAP3K7 binding protein 2	Cytoplasm	other	7.07354e-05	3.22612e-06	down	2.16795	-2.16795	-1.11633	17	16	Cell Signaling, Inflammatory Response, Organismal Survival
21	Tlr										17	16	Cell Signaling, Inflammatory Response, Organismal Survival
21	TLR2	toll like receptor 2	Plasma Membrane	transmembrane receptor	8.09449e-05	5.23963e-06	up	4.16405	4.16405	2.05799	17	16	Cell Signaling, Inflammatory Response, Organismal Survival
21	Tnf (family)										17	16	Cell Signaling, Inflammatory Response, Organismal Survival
21	Tnf receptor										17	16	Cell Signaling, Inflammatory Response, Organismal Survival
21	TNFAIP3	TNF alpha induced protein 3	Nucleus	enzyme	4.63841e-05	6.73483e-07	up	3.2656	3.2656	1.70735	17	16	Cell Signaling, Inflammatory Response, Organismal Survival
21	TRAF1	TNF receptor associated factor 1	Cytoplasm	other	7.2424e-05	3.63029e-06	up	5.55985	5.55985	2.47505	17	16	Cell Signaling, Inflammatory Response, Organismal Survival
21	UBE2N	ubiquitin conjugating enzyme E2 N	Cytoplasm	enzyme	0.000101046	8.66474e-06	down	2.23654	-2.23654	-1.16127	17	16	Cell Signaling, Inflammatory Response, Organismal Survival
21	Ubiquitin										17	16	Cell Signaling, Inflammatory Response, Organismal Survival
21	ZNF697	zinc finger protein 697	Other	other	7.2424e-05	3.61697e-06	up	2.50791	2.50791	1.32649	17	16	Cell Signaling, Inflammatory Response, Organismal Survival
22	Angiotensin II receptor type 1										16	14	Cardiovascular System Development and Function, Organismal Development, Cellular Development
22	CA2	carbonic anhydrase 2	Cytoplasm	enzyme	8.02025e-05	5.01838e-06	down	2.0211	-2.0211	-1.01514	16	14	Cardiovascular System Development and Function, Organismal Development, Cellular Development
22	Ctbp										16	14	Cardiovascular System Development and Function, Organismal Development, Cellular Development
22	ELK3	ELK3, ETS transcription factor	Nucleus	transcription regulator	0.00024621	5.1675e-05	up	2.23868	2.23868	1.16265	16	14	Cardiovascular System Development and Function, Organismal Development, Cellular Development
22	ERK										16	14	Cardiovascular System Development and Function, Organismal Development, Cellular Development
22	Fcgr3										16	14	Cardiovascular System Development and Function, Organismal Development, Cellular Development
22	Fgf										16	14	Cardiovascular System Development and Function, Organismal Development, Cellular Development
22	FGF1	fibroblast growth factor 1	Extracellular Space	growth factor	0.000689416	0.000339749	up	2.7327	2.7327	1.45033	16	14	Cardiovascular System Development and Function, Organismal Development, Cellular Development
22	FGF5	fibroblast growth factor 5	Extracellular Space	growth factor	3.65159e-05	2.83522e-07	up	3.22383	3.22383	1.68878	16	14	Cardiovascular System Development and Function, Organismal Development, Cellular Development
22	Fgfr										16	14	Cardiovascular System Development and Function, Organismal Development, Cellular Development
22	FGFR2	fibroblast growth factor receptor 2	Plasma Membrane	kinase	0.000292993	7.4204e-05	down	4.45302	-4.45302	-2.15478	16	14	Cardiovascular System Development and Function, Organismal Development, Cellular Development
22	GSE1	Gse1 coiled-coil protein	Extracellular Space	other	0.000684402	0.000335559	down	2.01924	-2.01924	-1.01381	16	14	Cardiovascular System Development and Function, Organismal Development, Cellular Development
22	Hspg										16	14	Cardiovascular System Development and Function, Organismal Development, Cellular Development
22	JUN/JUNB/JUND										16	14	Cardiovascular System Development and Function, Organismal Development, Cellular Development
22	MAFF	v-maf avian musculoaponeurotic fibrosarcoma oncogene homolog F	Nucleus	transcription regulator	4.21674e-05	4.08421e-07	up	2.66875	2.66875	1.41617	16	14	Cardiovascular System Development and Function, Organismal Development, Cellular Development
22	Mapk kinase										16	14	Cardiovascular System Development and Function, Organismal Development, Cellular Development
22	N-Cadherin										16	14	Cardiovascular System Development and Function, Organismal Development, Cellular Development
22	NCK										16	14	Cardiovascular System Development and Function, Organismal Development, Cellular Development
22	Neuropilin										16	14	Cardiovascular System Development and Function, Organismal Development, Cellular Development
22	NRP2	neuropilin 2	Plasma Membrane	kinase	0.000805229	0.000439483	down	2.02262	-2.02262	-1.01622	16	14	Cardiovascular System Development and Function, Organismal Development, Cellular Development
22	Oas										16	14	Cardiovascular System Development and Function, Organismal Development, Cellular Development
22	PCSK5	proprotein convertase subtilisin/kexin type 5	Extracellular Space	peptidase	6.83344e-05	2.83433e-06	down	2.0834	-2.0834	-1.05894	16	14	Cardiovascular System Development and Function, Organismal Development, Cellular Development
22	PLC gamma										16	14	Cardiovascular System Development and Function, Organismal Development, Cellular Development
22	Rsk										16	14	Cardiovascular System Development and Function, Organismal Development, Cellular Development
22	Sema3										16	14	Cardiovascular System Development and Function, Organismal Development, Cellular Development
22	SEMA3A	semaphorin 3A	Extracellular Space	other	0.000519394	0.000207155	up	2.7446	2.7446	1.4566	16	14	Cardiovascular System Development and Function, Organismal Development, Cellular Development
22	SEMA3C	semaphorin 3C	Extracellular Space	other	7.89682e-05	4.88712e-06	up	2.25702	2.25702	1.17442	16	14	Cardiovascular System Development and Function, Organismal Development, Cellular Development
22	SERCA										16	14	Cardiovascular System Development and Function, Organismal Development, Cellular Development
22	SERPINB2	serpin family B member 2	Extracellular Space	other	0.00148016	0.00107657	up	4.30458	4.30458	2.10587	16	14	Cardiovascular System Development and Function, Organismal Development, Cellular Development
22	SYK/ZAP										16	14	Cardiovascular System Development and Function, Organismal Development, Cellular Development
22	TCF										16	14	Cardiovascular System Development and Function, Organismal Development, Cellular Development
22	TLR2/TLR4										16	14	Cardiovascular System Development and Function, Organismal Development, Cellular Development
22	VAV										16	14	Cardiovascular System Development and Function, Organismal Development, Cellular Development
22	VAV3	vav guanine nucleotide exchange factor 3	Extracellular Space	cytokine	9.63321e-05	7.8327e-06	down	8.02289	-8.02289	-3.00412	16	14	Cardiovascular System Development and Function, Organismal Development, Cellular Development
22	VEGFC	vascular endothelial growth factor C	Extracellular Space	growth factor	4.25833e-05	4.70028e-07	up	2.6596	2.6596	1.41121	16	14	Cardiovascular System Development and Function, Organismal Development, Cellular Development
23	AK4	adenylate kinase 4	Cytoplasm	kinase	0.000354553	0.000104528	down	2.32812	-2.32812	-1.21917	16	14	Cell Death and Survival, Cancer, Gastrointestinal Disease
23	C1orf106	chromosome 1 open reading frame 106	Other	other	5.28463e-05	1.30939e-06	up	4.13028	4.13028	2.04624	16	14	Cell Death and Survival, Cancer, Gastrointestinal Disease
23	C6orf1	chromosome 6 open reading frame 1	Other	other	6.89565e-05	3.02344e-06	up	2.22987	2.22987	1.15696	16	14	Cell Death and Survival, Cancer, Gastrointestinal Disease
23	COPS5										16	14	Cell Death and Survival, Cancer, Gastrointestinal Disease
23	DOCK4	dedicator of cytokinesis 4	Plasma Membrane	other	3.0027e-05	8.92081e-08	up	3.29638	3.29638	1.72088	16	14	Cell Death and Survival, Cancer, Gastrointestinal Disease
23	DUOX1										16	14	Cell Death and Survival, Cancer, Gastrointestinal Disease
23	EGFR										16	14	Cell Death and Survival, Cancer, Gastrointestinal Disease
23	EGFR ligand										16	14	Cell Death and Survival, Cancer, Gastrointestinal Disease
23	FAM98A										16	14	Cell Death and Survival, Cancer, Gastrointestinal Disease
23	FASLG										16	14	Cell Death and Survival, Cancer, Gastrointestinal Disease
23	G3BP2	G3BP stress granule assembly factor 2	Cytoplasm	enzyme	0.000168797	2.52097e-05	down	2.31805	-2.31805	-1.21291	16	14	Cell Death and Survival, Cancer, Gastrointestinal Disease
23	glycochenodeoxycholate										16	14	Cell Death and Survival, Cancer, Gastrointestinal Disease
23	HAVCR1	hepatitis A virus cellular receptor 1	Plasma Membrane	other	0.000114195	1.1129e-05	down	2.97561	-2.97561	-1.57319	16	14	Cell Death and Survival, Cancer, Gastrointestinal Disease
23	KLHL21										16	14	Cell Death and Survival, Cancer, Gastrointestinal Disease
23	LAD1										16	14	Cell Death and Survival, Cancer, Gastrointestinal Disease
23	LRCH2	leucine-rich repeats and calponin homology (CH) domain containing 2	Other	other	4.05507e-05	3.57071e-07	down	2.85967	-2.85967	-1.51585	16	14	Cell Death and Survival, Cancer, Gastrointestinal Disease
23	MGARP	mitochondria localized glutamic acid rich protein	Cytoplasm	other	0.00114137	0.000752875	down	2.33439	-2.33439	-1.22305	16	14	Cell Death and Survival, Cancer, Gastrointestinal Disease
23	MIR22HG	MIR22 host gene	Other	other	4.72356e-05	7.58099e-07	up	2.1692	2.1692	1.11716	16	14	Cell Death and Survival, Cancer, Gastrointestinal Disease
23	MPP4	membrane palmitoylated protein 4	Cytoplasm	kinase	0.000268545	6.19052e-05	up	6.90618	6.90618	2.78789	16	14	Cell Death and Survival, Cancer, Gastrointestinal Disease
23	MT1L										16	14	Cell Death and Survival, Cancer, Gastrointestinal Disease
23	PHLDA1	pleckstrin homology like domain family A member 1	Cytoplasm	other	4.21674e-05	4.04011e-07	up	2.56874	2.56874	1.36106	16	14	Cell Death and Survival, Cancer, Gastrointestinal Disease
23	Pik3r										16	14	Cell Death and Survival, Cancer, Gastrointestinal Disease
23	PLK2	polo like kinase 2	Nucleus	kinase	0.00010572	9.37622e-06	down	2.12728	-2.12728	-1.08901	16	14	Cell Death and Survival, Cancer, Gastrointestinal Disease
23	PLPP1										16	14	Cell Death and Survival, Cancer, Gastrointestinal Disease
23	PROCR	protein C receptor	Plasma Membrane	other	4.80549e-05	8.55968e-07	down	2.18783	-2.18783	-1.1295	16	14	Cell Death and Survival, Cancer, Gastrointestinal Disease
23	RPS21										16	14	Cell Death and Survival, Cancer, Gastrointestinal Disease
23	SFN										16	14	Cell Death and Survival, Cancer, Gastrointestinal Disease
23	SGPP2	sphingosine-1-phosphate phosphatase 2	Cytoplasm	phosphatase	0.000169763	2.54897e-05	up	2.02405	2.02405	1.01725	16	14	Cell Death and Survival, Cancer, Gastrointestinal Disease
23	SH2D3A										16	14	Cell Death and Survival, Cancer, Gastrointestinal Disease
23	singlet oxygen										16	14	Cell Death and Survival, Cancer, Gastrointestinal Disease
23	sphingosine-1-phosphate										16	14	Cell Death and Survival, Cancer, Gastrointestinal Disease
23	sphingosine-1-phosphate phosphatase										16	14	Cell Death and Survival, Cancer, Gastrointestinal Disease
23	TNS4										16	14	Cell Death and Survival, Cancer, Gastrointestinal Disease
23	TP73										16	14	Cell Death and Survival, Cancer, Gastrointestinal Disease
23	WT1										16	14	Cell Death and Survival, Cancer, Gastrointestinal Disease
24	7S NGF										15	13	Increased Levels of ALT, Cellular Movement, Hematological System Development and Function
24	Alpha 1 antitrypsin										15	13	Increased Levels of ALT, Cellular Movement, Hematological System Development and Function
24	ALT										15	13	Increased Levels of ALT, Cellular Movement, Hematological System Development and Function
24	C/ebp										15	13	Increased Levels of ALT, Cellular Movement, Hematological System Development and Function
24	C1q										15	13	Increased Levels of ALT, Cellular Movement, Hematological System Development and Function
24	CLEC4E	C-type lectin domain family 4 member E	Plasma Membrane	other	3.65159e-05	2.25759e-07	up	3.93093	3.93093	1.97487	15	13	Increased Levels of ALT, Cellular Movement, Hematological System Development and Function
24	COL17A1	collagen type XVII alpha 1	Extracellular Space	other	0.00172369	0.00130231	up	2.55161	2.55161	1.35141	15	13	Increased Levels of ALT, Cellular Movement, Hematological System Development and Function
24	CTSS	cathepsin S	Cytoplasm	peptidase	0.000531564	0.000215648	up	3.37352	3.37352	1.75426	15	13	Increased Levels of ALT, Cellular Movement, Hematological System Development and Function
24	EGLN3	egl-9 family hypoxia-inducible factor 3	Cytoplasm	enzyme	0.000151048	1.99892e-05	down	2.79284	-2.79284	-1.48173	15	13	Increased Levels of ALT, Cellular Movement, Hematological System Development and Function
24	Fc gamma receptor										15	13	Increased Levels of ALT, Cellular Movement, Hematological System Development and Function
24	Fcgr2										15	13	Increased Levels of ALT, Cellular Movement, Hematological System Development and Function
24	GBP3	guanylate binding protein 3	Cytoplasm	enzyme	5.72628e-05	1.70067e-06	up	2.32619	2.32619	1.21797	15	13	Increased Levels of ALT, Cellular Movement, Hematological System Development and Function
24	GOT										15	13	Increased Levels of ALT, Cellular Movement, Hematological System Development and Function
24	GSTA4	glutathione S-transferase alpha 4	Cytoplasm	enzyme	0.000411532	0.000137256	down	2.86343	-2.86343	-1.51774	15	13	Increased Levels of ALT, Cellular Movement, Hematological System Development and Function
24	HDL										15	13	Increased Levels of ALT, Cellular Movement, Hematological System Development and Function
24	hemoglobin										15	13	Increased Levels of ALT, Cellular Movement, Hematological System Development and Function
24	IgG										15	13	Increased Levels of ALT, Cellular Movement, Hematological System Development and Function
24	IgG2a										15	13	Increased Levels of ALT, Cellular Movement, Hematological System Development and Function
24	IL6	interleukin 6	Extracellular Space	cytokine	3.65159e-05	2.68298e-07	up	2.78882	2.78882	1.47965	15	13	Increased Levels of ALT, Cellular Movement, Hematological System Development and Function
24	IL23										15	13	Increased Levels of ALT, Cellular Movement, Hematological System Development and Function
24	Inflammasome (Nalp3										15	13	Increased Levels of ALT, Cellular Movement, Hematological System Development and Function
24	Asc										15	13	Increased Levels of ALT, Cellular Movement, Hematological System Development and Function
24	Casp1)										15	13	Increased Levels of ALT, Cellular Movement, Hematological System Development and Function
24	LTB	lymphotoxin beta	Extracellular Space	cytokine	0.000325041	9.10768e-05	up	3.23391	3.23391	1.69328	15	13	Increased Levels of ALT, Cellular Movement, Hematological System Development and Function
24	MHC Class II (complex)										15	13	Increased Levels of ALT, Cellular Movement, Hematological System Development and Function
24	MHC II										15	13	Increased Levels of ALT, Cellular Movement, Hematological System Development and Function
24	MIR124										15	13	Increased Levels of ALT, Cellular Movement, Hematological System Development and Function
24	MIRLET7										15	13	Increased Levels of ALT, Cellular Movement, Hematological System Development and Function
24	Nr1h										15	13	Increased Levels of ALT, Cellular Movement, Hematological System Development and Function
24	Pgk										15	13	Increased Levels of ALT, Cellular Movement, Hematological System Development and Function
24	PTGIS	prostaglandin I2 (prostacyclin) synthase	Cytoplasm	enzyme	0.00012705	1.42352e-05	down	2.49963	-2.49963	-1.32171	15	13	Increased Levels of ALT, Cellular Movement, Hematological System Development and Function
24	PTX3	pentraxin 3	Extracellular Space	other	0.000292993	7.42705e-05	up	3.61367	3.61367	1.85347	15	13	Increased Levels of ALT, Cellular Movement, Hematological System Development and Function
24	SAA										15	13	Increased Levels of ALT, Cellular Movement, Hematological System Development and Function
24	SAA1	serum amyloid A1	Extracellular Space	transporter	7.47863e-05	4.10752e-06	up	2.96712	2.96712	1.56907	15	13	Increased Levels of ALT, Cellular Movement, Hematological System Development and Function
24	SAA2	serum amyloid A2	Extracellular Space	other	0.000270696	6.3702e-05	up	2.83328	2.83328	1.50248	15	13	Increased Levels of ALT, Cellular Movement, Hematological System Development and Function
24	SEC24A	SEC24 homolog A, COPII coat complex component	Cytoplasm	transporter	7.21903e-05	3.49628e-06	up	2.20327	2.20327	1.13964	15	13	Increased Levels of ALT, Cellular Movement, Hematological System Development and Function
24	Sphk										15	13	Increased Levels of ALT, Cellular Movement, Hematological System Development and Function
25	ACSM3	acyl-CoA synthetase medium-chain family member 3	Cytoplasm	enzyme	0.000221432	4.21221e-05	down	2.53801	-2.53801	-1.3437	15	13	Connective Tissue Development and Function, Skeletal and Muscular System Development and Function, Tissue Morphology
25	beta-estradiol										15	13	Connective Tissue Development and Function, Skeletal and Muscular System Development and Function, Tissue Morphology
25	BOK										15	13	Connective Tissue Development and Function, Skeletal and Muscular System Development and Function, Tissue Morphology
25	CORO2B	coronin 2B	Other	other	0.000791957	0.000426071	up	2.66867	2.66867	1.41612	15	13	Connective Tissue Development and Function, Skeletal and Muscular System Development and Function, Tissue Morphology
25	CSGALNACT2	chondroitin sulfate N-acetylgalactosaminyltransferase 2	Cytoplasm	enzyme	0.000966498	0.000581025	up	2.06044	2.06044	1.04295	15	13	Connective Tissue Development and Function, Skeletal and Muscular System Development and Function, Tissue Morphology
25	CUL3										15	13	Connective Tissue Development and Function, Skeletal and Muscular System Development and Function, Tissue Morphology
25	CXorf56	chromosome X open reading frame 56	Extracellular Space	other	0.00050518	0.000196357	down	2.11068	-2.11068	-1.07771	15	13	Connective Tissue Development and Function, Skeletal and Muscular System Development and Function, Tissue Morphology
25	DDIT3										15	13	Connective Tissue Development and Function, Skeletal and Muscular System Development and Function, Tissue Morphology
25	EMP1	epithelial membrane protein 1	Plasma Membrane	other	7.2018e-05	3.47547e-06	up	3.52521	3.52521	1.81771	15	13	Connective Tissue Development and Function, Skeletal and Muscular System Development and Function, Tissue Morphology
25	FAM167A	family with sequence similarity 167 member A	Other	other	0.000937104	0.00055779	up	2.3185	2.3185	1.21319	15	13	Connective Tissue Development and Function, Skeletal and Muscular System Development and Function, Tissue Morphology
25	FGF6										15	13	Connective Tissue Development and Function, Skeletal and Muscular System Development and Function, Tissue Morphology
25	FGFBP1										15	13	Connective Tissue Development and Function, Skeletal and Muscular System Development and Function, Tissue Morphology
25	GNRH2										15	13	Connective Tissue Development and Function, Skeletal and Muscular System Development and Function, Tissue Morphology
25	GSTP1										15	13	Connective Tissue Development and Function, Skeletal and Muscular System Development and Function, Tissue Morphology
25	Gstt3										15	13	Connective Tissue Development and Function, Skeletal and Muscular System Development and Function, Tissue Morphology
25	HRAS										15	13	Connective Tissue Development and Function, Skeletal and Muscular System Development and Function, Tissue Morphology
25	IL17RD										15	13	Connective Tissue Development and Function, Skeletal and Muscular System Development and Function, Tissue Morphology
25	IL20RA										15	13	Connective Tissue Development and Function, Skeletal and Muscular System Development and Function, Tissue Morphology
25	KRTAP2-3/KRTAP2-4	keratin associated protein 2-3	Other	other	0.000401387	0.000130297	up	2.9059	2.9059	1.53899	15	13	Connective Tissue Development and Function, Skeletal and Muscular System Development and Function, Tissue Morphology
25	LMNA										15	13	Connective Tissue Development and Function, Skeletal and Muscular System Development and Function, Tissue Morphology
25	LRRC8B	leucine-rich repeat containing 8 family member B	Other	other	0.00457136	0.00408019	down	2.19667	-2.19667	-1.13532	15	13	Connective Tissue Development and Function, Skeletal and Muscular System Development and Function, Tissue Morphology
25	MAPK1										15	13	Connective Tissue Development and Function, Skeletal and Muscular System Development and Function, Tissue Morphology
25	MIR320										15	13	Connective Tissue Development and Function, Skeletal and Muscular System Development and Function, Tissue Morphology
25	MMD										15	13	Connective Tissue Development and Function, Skeletal and Muscular System Development and Function, Tissue Morphology
25	MUC5B										15	13	Connective Tissue Development and Function, Skeletal and Muscular System Development and Function, Tissue Morphology
25	p38 Sapk										15	13	Connective Tissue Development and Function, Skeletal and Muscular System Development and Function, Tissue Morphology
25	Relaxin										15	13	Connective Tissue Development and Function, Skeletal and Muscular System Development and Function, Tissue Morphology
25	RHOBTB1	Rho related BTB domain containing 1	Other	enzyme	0.000185215	3.03471e-05	down	2.60771	-2.60771	-1.38278	15	13	Connective Tissue Development and Function, Skeletal and Muscular System Development and Function, Tissue Morphology
25	RLN2										15	13	Connective Tissue Development and Function, Skeletal and Muscular System Development and Function, Tissue Morphology
25	SLC52A1										15	13	Connective Tissue Development and Function, Skeletal and Muscular System Development and Function, Tissue Morphology
25	TMEM37	transmembrane protein 37	Plasma Membrane	ion channel	0.00041659	0.000140132	down	2.69458	-2.69458	-1.43006	15	13	Connective Tissue Development and Function, Skeletal and Muscular System Development and Function, Tissue Morphology
25	TMEM64	transmembrane protein 64	Cytoplasm	other	7.01231e-05	3.14832e-06	down	3.48886	-3.48886	-1.80275	15	13	Connective Tissue Development and Function, Skeletal and Muscular System Development and Function, Tissue Morphology
25	TSC22D1										15	13	Connective Tissue Development and Function, Skeletal and Muscular System Development and Function, Tissue Morphology
25	VEPH1	ventricular zone expressed PH domain containing 1	Nucleus	other	0.000447669	0.000158951	up	2.61637	2.61637	1.38756	15	13	Connective Tissue Development and Function, Skeletal and Muscular System Development and Function, Tissue Morphology
25	ZSCAN31	zinc finger and SCAN domain containing 31	Nucleus	transcription regulator	0.000402295	0.000131189	down	3.55825	-3.55825	-1.83117	15	13	Connective Tissue Development and Function, Skeletal and Muscular System Development and Function, Tissue Morphology
